# Supplementary material for: Strategies to Identify Recognition Signals and Targets of SUMOylation
Source: Hindawi journal article supplement (doi:10.1155/2012/875148), 2012-01-01
Supplement: f1 [file 875148.f1.pdf]

## Supplementary Legends

Supplementary Figure 1: Integrated view of the role of SUMO in the Glucocorticoid Receptor Signalling pathway. Ingenuity analysis of proteins that have been identified (in gray) in recent studies: PGK1, PKM2, ACSL3, PKLR, GAPDH, LDHB, ADH5, HK1, GPI, HK2, ENO1, ALDH3A2, DLAT, ALDH1A2, DLD, ALDOA, LDHA and ALDOC (Figure 4 and supplementary table 1) by mass spectrometry using His-6-SUMO-tagged.

Supplementary Figure 2: Integrated view of the role of SUMO in the Ubiquitin-Proteasome pathway. Ingenuity analysis of proteins that have been identified (in gray) in recent studies: USP14, ANAPC1, HSPA5, USP39, USO1, HSPA4, HSP90B1, HSP90AB1, PSMC6, BRCA1, UBB, DNAJC9, HSPH1, HSPA9, MDM2, HSPD1, PSMD3, HSPA8, ANAPC4, PSMC1, PSMD2, PSMD12, HSP90AA1, PSMD1, UBC, USP34, USP25, VHL and UBE2I (Figure 4 and supplementary table 1) by mass spectrometry using His-6-SUMO-tagged.

Supplementary table 1. Databases of putative and real sumoylated proteins used in this work.

Supplementary table 2. Overlapping of datasets of putative and real sumoylated proteins used in this work.

Supplementary table 3. Databases of sumoylated peptides used in this work.

Supplementary table 4. Molecular functions of putative and real sumoylated proteins found using IPA.

Supplementary table 5. Canonical pathways of putative and real sumoylated proteins found using IPA.

Supplementary table 6. Biomarkers and potential drug targets found in putative and real sumoylated proteins using IPA.

### Proteins considered in all comparisons

blomsterMCP.txt not , Gallison.txt, matic.txt, phosphosite.txt:

293@,DDX3X,PRMT5,HNRPD,L,NKRF,MAGEB2,CFLAR,PSMD3,HNRNP,R,PRPF3,NARS,NRD1,SYNCRIP,EIF5B,H2AFY,CS,SLC25A12,RSL1D1,SRP72,MTA2,ALDH1A2,PRPF6,IKBKAP,SMC2,AHSA1,STAU1,LDHA,PNP,PGK1,HBZ,ALB,TFRC,ALDOA,ANXA1,TUBB4A,HIST1H2AB,HIST1H2AE,ATP1A1,SLC25A5,EIF2S1,RPLP0,ATP5B,ENO1,GPI,LDHB,ANXA2,TUBB,PFN1,HSP90AA1,HSP90AB1,SRPR,ASNS,HMBS,SNRNP70,VIM,RPSA,DLD,ALDOC,DLAT,HSPD1,HSPA5,HSPA8,ACADM,G6PD,ADH5,PABPC1,IMPDH2,CKB,EEF2,PDIA4,P4HA1,FDPS,PKM2,HSP90B1,DARS,RPS2,HIST1H1B,FAH,UBTF,TCP1,RPL7,V

CL,RPL17,HK1,EIF2AK2,VDAC1,GART,PAICS,WARS,RPS3,AHCY,MCM3,ATP5A1,MSN,U2AF2,APEX1,TKT,EEF1D,RPL12,PDIA3,NMT1,PKLR,SERPINB1,SDHA,RRM2,ATIC,PYCR1,MCM4,MCM5,HSPA4,RPL22,FUS,ATP5C1,CPOX,PPP1CC,TALDO1,RBMX,HSPA9,RPL3,FEN1,CCT6A,RPL13A,STAT3,MDH1,MDH2,HADHA,GARS,STAT5A,LRPPRC,MSH2,VDAC2,RPL5,CAPZB,ARC1,CCT5,CCT3,TUFM,AARS,SARS,MCM2,GMPS,RPL14,CCT8,CCT4,MSH6,HK2,CAPZA1,BLVRA,ACLY,YARS,USP14,VCP,NAP1L1,MARS,EIF4A1,RPS3A,ATP6V0D1,RPS7,PPP1CA,PPP1CB,PSMC1,RPS8,RPS16,RPS18,PSMC6,RPL7A,RPS6,HIST1H2BC,HIST1H2BE,HIST1H2BF,HIST1H2BI,HIST1H2BJ,RAN,PPIA,AP2B1,GNAI1,GNB2L1,ACTC1,EEF1A1,TUBA1B,TUBB4B,CCT2,MPP1,CAP1,EXOSC10,PLCB3,RPL18A,RPL6,AKR1C1,AKR1C3,PPAT,PRDX1,RPL18,DHX9,ILF2,ILF3,TRAP1,HNRNPA0,PSMD2,PABPC4,NACA,TUBB2A,HNRNPD,BOP1,FLNC,RBM39,MCM6,SMC1A,RRP1B,GANAB,CHD4,SART3,EFTUD2,KARS,PPA1,NONO,PCBP1,PCBP2,SF3B3,DDDB1,FSCN1,NDUFA9,IMMT,HNRNPUL2,TIMM50,LARP7,USP39,CDCA8,RRP12,PRPF8,DARS2,TUBA1A,SND1,DHX30,FERMT3,DDX42,KIAA1967,NUP93,LRRC47,ABCF1,PRPF31,DNAJC9,DDX1,PSMF1,HSPH1,MYO18A,GCN1L1,DHX38,NUP205,ANP32B,DDX17,UPF1,DDX27,RBM14,SRPK1,PSMD1,POP1,PHB2,CCT7,EBNA1BP2,PRMT1,DDX50,WDR77,TUBB6,DDX23,UTP14A,ACAT2,SPATA16,GTPBP4,WDR33,XRN2,GHITM,FN3K,RNPEP,DDX21,NANS,FARSB,SMC4,ATAD3A,RBM28,IGF2BP1,RCC2,LARS,DHCR7,SRP68,RALY,CORO1C,PRPF19,RPL26L1,VDAC3,FARSA,DRG1,UTP18,PSAT1

Gallison.txt not , blomsterMCP.txt, matic.txt, phosphosite.txt:

306@,BTBD11,PGRMC1,PIK3C2A,NOP56,AP3D1,CHD1,CHD2,SLC27A2,ZNF263,ZNF609,ZNF646,ZBTB5,ERC2,AXIN1,YY2,DHX15,DAPK3,TBX1,PLRG1,NDUFB3,URB1,ZIC3,CCNT2,USO1,ABCB7,PRPF40A,MAF,ERLIN1,NUP155,ZMPSTE24,ARL6IP5,ZNF202,LETM1,TNKS,ZIC2,SGPL1,WIZ,DLGAP3,ONECUT2,HAND1,CA2,KRT14,KRT1,RPN1,ARG1,EPHX1,SLC3A2,CYC1,KRT19,H2AFZ,KRT10,KRT13,JUP,DSP,HIST1H1D,ATP2A2,ZNF37A,XBP1,SON,POU3F3,POU3F2,RFX1,ATP2B4,ABCD3,HOXA9,OTX1,KRT9,DDOST,TMPO,RPL27A,STT3A,CAMLG,SSR4,BCAP31,ATP1B3,BRPF1,FOXG1,MAZ,TMEM33,NUP107,SEC61B,RAB2A,RPL15,RAB1A,UBA52,TRA2B,SEC11A,NOP14,REEP5,SPTBN1,DSG1,CREB5,KRT17,DLX2,BAX,DSC1,RBBP4,NCBP1,NUP160,BPTF,TP53BP1,LMAN2,FOXF2,NNT,SLC39A6,PRPF4B,STIM1,TRA2A,DYRK1A,SPTAN1,PKP1,MLEC,KRT81,ITPR3,TRIP12,LBR,ARID5B,NOLC1,KRT72,NCAPD2,PWP2,KRT31,KIAA0020,SF3B4,TSC22D1,NSDHL,CPEB4,AMOT,GLE1,ZNF326,NOM1,FLG2,FAM76B,MIA3,DNNTIP2,NUP188,BEND3,KPRP,RIF1,CACHD1,ARID2,INTS3,KIAA1429,IQSEC1,SUMO4,DHRS7B,TMEM214,TAF2,ZC3H14,TMEM205,PTPLB,RNF111,USP34,HIST2H3D,HIST2H3C,HIST2H3A,CBLL1,LPCAT2,HIST3H2A,NUFIP2,MTDH,CAND1,HRNR,PHF6,ELMOD2,MLL5,ZNF687,KRT78,STAG2,JAGN1,C4orf32,GDPD1,UBAC2,SCCPDH,LEMD2,SLC30A7,LPCAT1,ARID1B,SMARCC2,PMFBP1,RDH11,STT3B,HM13,NUP210,NOC3L,PHIP,SYNE2,AUTS2,BRI3BP,SLC39A7,CENPI,TNPO1,NKD2,SMARCE1,NCLN,CIRH1A,LRRC59,RBM33,TMX3,ZNF462,IPO9,PPP1R10,CLCC1,TMEM209,SPEN,RNF2,CDX2,ATXN2,HIST1H2BN,ADPGK,ESYT1,TMEM43,TMEM48,C1orf35,NOC4L,NUP85,FANCD2,KIAA1715,BRD8,ANAPC1,TMX1,ZNF644,ZNF768,NOL6,NOL11,FBRS,XPO5,PREB,BRD7,OSTC,KRT82,BMP2K,PDS5B,SACM1L,FANCI,SLTM,SMPD4,TEX10,CDK12,TECR,CALML5,PTPLAD1,TMEM111,H2AFY2,SEN1,ZBTB4,ZNF319,RERE,STX18,TFIP11,SEL1L,SEC63,SUN2,CCNL1,GPATCH8,ZNF777,ZNF608,SLC39A10,YEATS2,TMCO1,SSR3,TIMELESS,FOXJ3,SMC3,LRCH1,LEMD3,TNPO3,MAFB,GTF3C3,AUP1,DNMT3A,TUBB2B,DGKE,HIST1H2AG,HIST1H2AI,HIST1H2AK,HIST1H2AL,HIST1H2AM,WDR75,VAPA,S100A9,PDS5A,WDR3,CDIPT,HSD17B12,YWHAZ,PDS5B,UBC,UBB,UBA52,RPS27A,GATA6,RDH11,ZNF777,VAPB,DCD,SRPRB,TRA2A,KTN1,RAB1A,EMD,ALDH3A2,CYCS,ACSL3,ORC5,TPR

blomsterMCP.txt, Gallison.txt not , matic.txt, phosphosite.txt:  
57@,PES1,XPO1,ACTN4,SMARCA5,DKC1,SNRNP200,GAPDH,HSPA1A,HSPA1B,SLC25A6,HNRNPL,  
HIST1H1C,NCL,FBL,HNRNPA2B1,SFPQ,RPL13,PTBP1,HNRNPH3,HIST1H2BB,MYH9,MYH10,IARS,M  
ATR3,FASN,COPA,CSE1L,RAB10,HIST1H4A,HIST1H4B,HIST1H4C,HIST1H4D,HIST1H4E,HIST1H4F,HI  
ST1H4H,HIST2H4A,HIST2H4B,HIST1H4I,HIST1H4J,HIST1H4K,HIST1H4L,HIST4H4,PRKDC,SLC25A3,  
CLTC,SSRP1,MDC1,PDCD11,BMS1,KPNB1,H2AFV,CYFIP1,FTSJ3,MYBBP1A,DDX18,BAZ1B,TLN1  
matic.txt not , blomsterMCP.txt, Gallison.txt, phosphosite.txt: 5@,SAP18,SNRPD2,AHNAK,ZBTB2,SLK

blomsterMCP.txt, matic.txt not , Gallison.txt, phosphosite.txt: 0@

Gallison.txt, matic.txt not , blomsterMCP.txt, phosphosite.txt: 2@,CANX,BRD4

blomsterMCP.txt, Gallison.txt, matic.txt not , phosphosite.txt: 0@

phosphosite.txt not , blomsterMCP.txt, Gallison.txt, matic.txt:

209@,KCNK1,PSMD12,ARNTL,DNM1L,NR5A2,RGPD8,TCERG1,MDM4,ATXN7,TP73,MAFG,ZEB2,T  
BL1X,LECT1,ZBTB7A,KLF8,NFATC1,KRT75,DHFR,SOD1,FOS,KRT6A,ESR1,NR3C1,KRT6B,TP53,TYMS  
,APP,JUN,SSB,KRT8,RB1,PGR,SP1,IGF1R,NR3C2,KRT7,ANXA5,MYB,AR,RARA,IRF1,SRF,SKIL,IRF2,ET  
S1,GATA1,CREB1,ATF7,CAPN2,CEBPB,PTPN1,ELK1,WT1,RXRA,KCNA5,SP100,CDK2,YY1,NFKBIA,P  
DE4A,ARID4A,KDM5A,SHMT1,RORA,CBS,SOX6,ZNF76,SREBF1,PPARG,SNCA,BRCA1,VHL,ETV5,ET  
V6,ELK3,CASP2,HTT,SLC1A2,ETV4,RAD52,NR4A2,YAP1,NRIP1,KRT6C,MAPKAPK2,CEBPD,GSK3B,P  
APOLA,CLCN7,HDGF,BLM,ATXN1,NRL,NR1H2,HDAC4,SOX10,KLF3,FOXL2,UBE2K,ESRRG,UBE2I,H  
MGN5,HSF1,NFKB2,MDM2,FLI1,KRT76,SATB1,POU5F1,MEF2A,SP3,CENPC1,LMNB2,HSF2,ZBTB16  
,MEF2C,PPARA,EP300,SREBF2,NR1H3,MAP3K1,NR5A1,CTBP1,XRCC4,SMAD4,HDAC1,TDG,MORC  
3,IKBKE,WRN,HIC1,MEF2D,POLD3,TAF5,NCOA2,CEBPE,NCOA1,TAF12,NFE2,HIF1A,ZXDC,GLYR1,P  
LAG1,RGPD4,GATAD2A,AHNAK2,ZFPM1,CKAP2L,MYOCD,PIAS4,NIN,SNIP1,GATAD2B,MAML1,TF  
AP2C,PROX1,KHSRP,KAT5,MKL1,FUBP1,SIRT1,FYTTD1,CDK5RAP2,PARK7,FMO2,ELF4,RGPD5, RGP  
D6,EPAS1,ARID3A,BACH2,TBL1XR1,SAP130,HIPK2,ZFP106,TP63,GCM1,DYRK4,PDGFC, TOPORS,SA  
LL1,NHP2,ZNF234,ZNF226,HSFX1,MRC2,UBA2,ZMYM2,DAXX,IFT172,TRPS1,USP25,XPO7,ANAPC4  
,ZNF221,CPSF3,RCOR1,HSF4,PLAGL2,SCAF8,SATB2,PA2G4,RUVBL2,RUVBL1,NOP58,TBX22,IKBKG,  
NCOA3

blomsterMCP.txt, phosphosite.txt not , Gallison.txt, matic.txt:

9@,NPM1,EPRS,PCNA,DDX5,ACADVL,HNRNPA3,HNRNPK,XPC,SAFB

Gallison.txt, phosphosite.txt not , blomsterMCP.txt, matic.txt:

17@,CBX4,KRT3,KRT2,CTCF,HNRNPF,SUMO3,ZNF146,KRT79,MAFA,ATXN2L,CHD8,KRT84,MBD1,  
ZNF148,ZNF711,XRCC5,DYNC1H1

blomsterMCP.txt, Gallison.txt, phosphosite.txt not , matic.txt:

7@,HNRNPA1, TOP2A,LMNB1, DNMT1, HNRNPH1, HNRNPU, TOP2B

matic.txt, phosphosite.txt not , blomsterMCP.txt, Gallison.txt:

32@,TRIM24,CD3EAP,MYO1B,FOSL2,MAP4,STAT1,VASP,ADAR,KHDRBS1,RLF,NAB1,IFI16,ZNF800  
,ARID4B,ZMYM1,PTRF,CCAR1,RBM12B,FNBP4,ZBTB38,ZNF280C,KDM2B,GEMIN5,RREB1,SYMPK,  
ZBTB9,THOC1,ERBB2IP,HNRNPUL1,ZNF295,TRIM33,ZBTB1

blomsterMCP.txt, matic.txt, phosphosite.txt not , Gallison.txt:

6@,SART1,LMNA,PARP1, TOP1,ACTB,SAFB2

Gallison.txt, matic.txt, phosphosite.txt not , blomsterMCP.txt:  
21@,KRT5,PML,RANGAP1,YLPM1,RBM25,RANBP2,SUMO2,SUMO1,ACTG1,GTF2I,TRIM28,TCOF1,  
ZMYM4,PBRM1,RSF1,PNN,BCLAF1,ACIN1,ZMYND8,ZNF451,GTF2I  
intersect all: 6@,SF3B1,HNRNPC,FLNA,MKI67,HNRNPM,NUMA1

93% of all proteins reported by Matic et al have been reported in at least one other study.

The biggest pairwise overlap of SUMOylated proteins was found between Matic and phosphosite with a  
overlap of 20.5%.

All pair wise comparisons:

|                                    |            |
|------------------------------------|------------|
| blomsterMCP.txt vs Gallison.txt    | 307 71 346 |
| blomsterMCP.txt vs matic.txt       | 365 13 59  |
| blomsterMCP.txt vs phosphosite.txt | 350 28 278 |
| Gallison.txt vs matic.txt          | 389 28 44  |
| Gallison.txt vs phosphosite.txt    | 367 50 256 |
| matic.txt vs phosphosite.txt       | 8 64 242   |
