# Supplementary material for: Strategies to Identify Recognition Signals and Targets of SUMOylation
Source: Hindawi journal article supplement (doi:10.1155/2012/875148), 2012-01-01

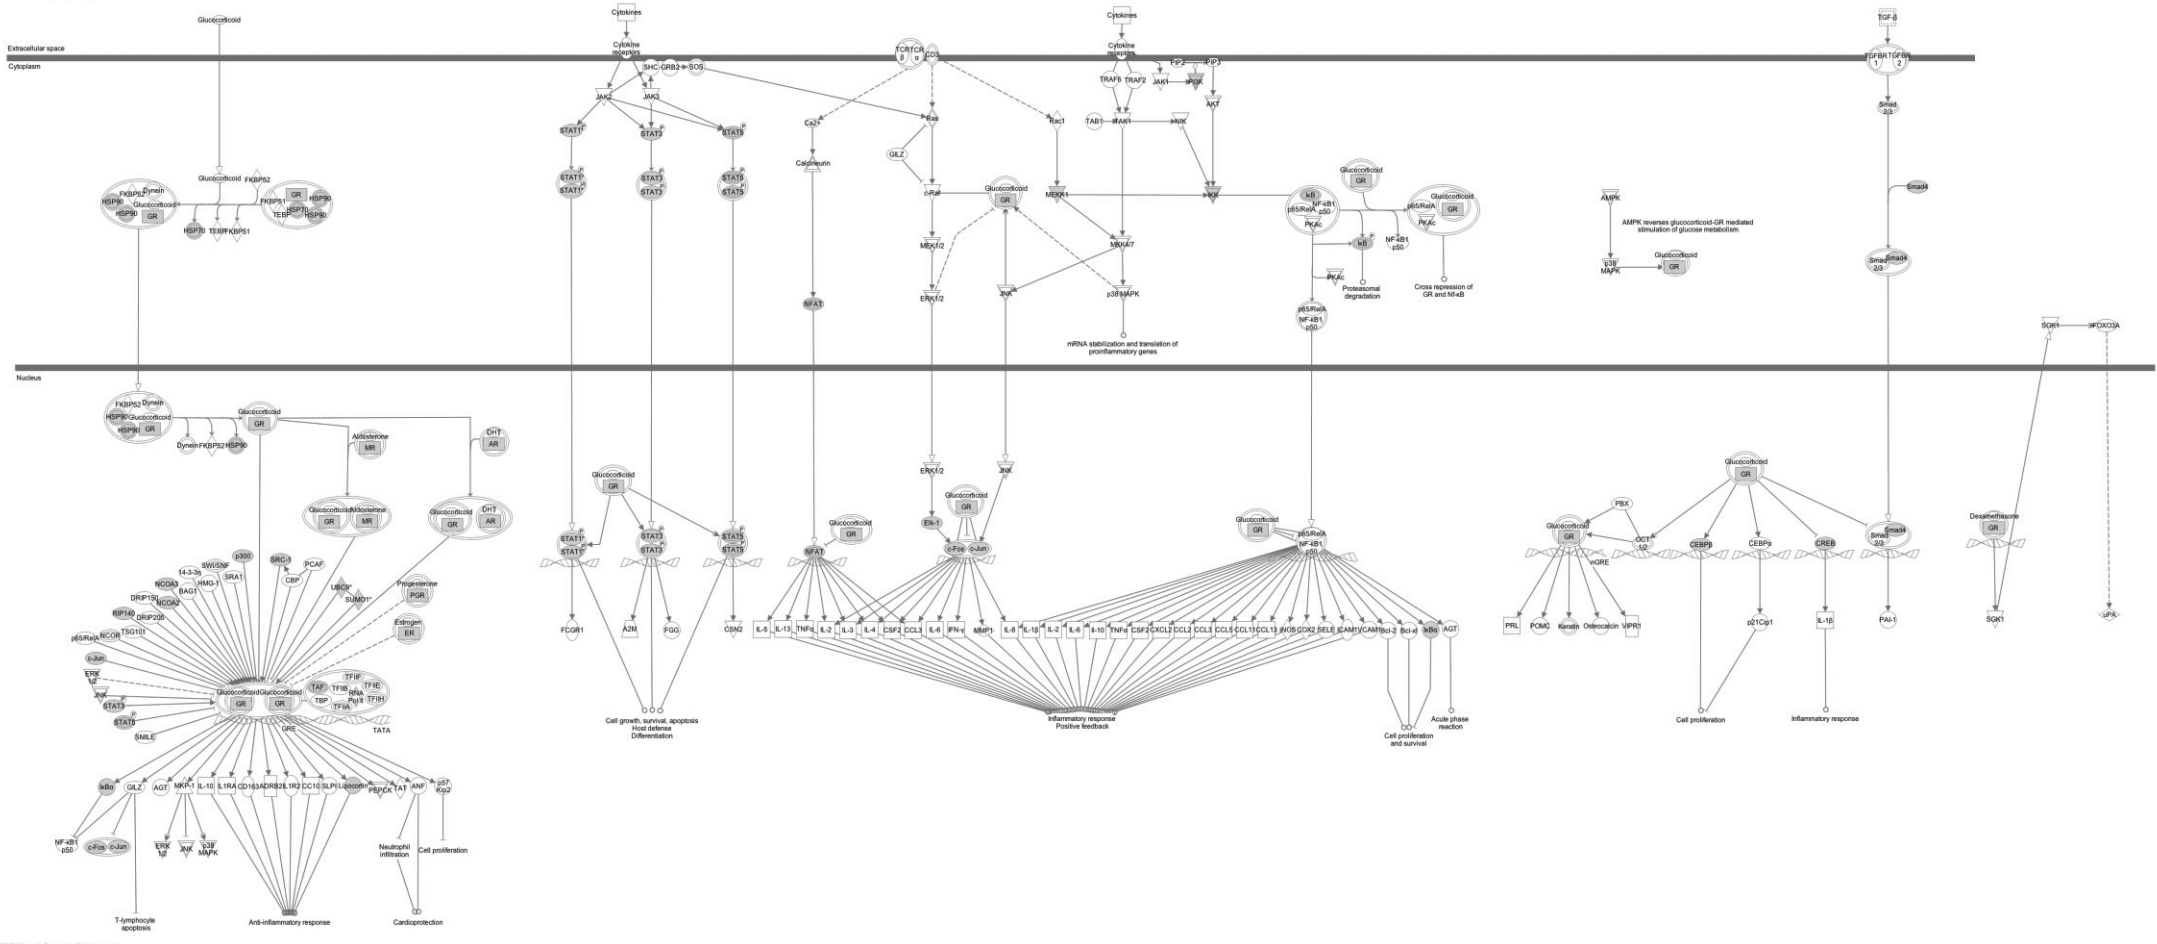

Supplement: f2 [file 875148.f2.pdf]
