# Supplementary material for: Strategies to Identify Recognition Signals and Targets of SUMOylation
Source: Biochem Res Int. 2012 Jul 1;2012:875148. doi: 10.1155/2012/875148 (PMC3395311; doi:10.1155/2012/875148)
Supplement: Supplementary file 4 [file 875148.f4.xls]

## Sheet: All
Supplementary table 1. Databases of putative and real sumoylated proteins used in this work.
Ac	Name	ref	Annotation	IPI
P46060	RAGP1_HUMAN	Blomster
Q13263	TIF1B_HUMAN	Blomster
P63165	SUMO1_HUMAN	Blomster
P61956	SUMO2_HUMAN	Blomster
Q9UBG0	MRC2_HUMAN	Blomster
Q8IYA6	CKP2L_HUMAN	Blomster
P46060	RAGP1_HUMAN	Blomster
Q13263	TIF1B_HUMAN	Blomster
P63165	SUMO1_HUMAN	Blomster
P61956	SUMO2_HUMAN	Blomster
Q16666	IF16_HUMAN	Blomster
Q9UPN6	RBM16_HUMAN	Blomster
Q9UG01	IF172_HUMAN	Blomster
Q99518	FMO2_HUMAN	Blomster
Q96QD9	FYTD1_HUMAN	Blomster
Q9UBD0	HSFX1_HUMAN	Blomster
Q8IYA6	CKP2L_HUMAN	Blomster
	ACIN1	Matic
	ACTB	Matic
	ADAR	Matic
	AHNAK	Matic
	ANX5	Matic
	APC4	Matic
	APC4	Matic
	ARID4B	Matic
	BCLAF1	Matic
	BRD4	Matic
	CANX	Matic
	CCAR1	Matic
	CD3EAP	Matic
	ERBB2IP	Matic
	FLNA	Matic
	FNBP4	Matic
	FOSL2	Matic
	GEMIN5	Matic
	GRL	Matic
	GRL	Matic
	GTF2I	Matic
	HNRNPC	Matic
	HNRNPM	Matic
	HNRNPM	Matic
	HNRNPUL1	Matic
	IFI16	Matic
	KDM2B	Matic
	KHDRBS1	Matic
	KRT5	Matic
	LMNA	Matic
	MAP4	Matic
	MKI67	Matic
	MYO1B	Matic
	NAB1	Matic
	NOL5	Matic
	NOL5	Matic
	NOLA2	Matic
	NP60	Matic
	NSBP1	Matic
	NUMA1	Matic
	PARP1	Matic
	PBRM1	Matic
	PML	Matic
	PNN	Matic
	PSMD12	Matic
	PTRF	Matic
	RANBP2	Matic
	RANBP2	Matic
	RANBP2	Matic
	RANGAP1	Matic
	RBM12B	Matic
	RBM25	Matic
	RLF	Matic
	RLF	Matic
	RREB1	Matic
	RSF1	Matic
	RSF1	Matic
	RSF1	Matic
	RSF1	Matic
	RSF1	Matic
	RSF1	Matic
	SAE2	Matic
	SAFB2	Matic
	SAFB2	Matic
	SAFB2	Matic
	SAFB2	Matic
	SAFB2	Matic
	SAP18	Matic
	SART1	Matic
	SEC22B	Matic
	SF3B1	Matic
	SLK	Matic
	SNIP-1	Matic
	SNRPD2	Matic
	STAT1	Matic
	SUMO1	Matic
	SUMO2	Matic
	SYMPK	Matic
	TCOF1	Matic
	THOC1	Matic
	TOP1	Matic
	TOP2	Matic
	TOP2	Matic
	TRIM24	Matic
	TRIM28; TIF1B	Matic
	TRIM28; TIF1B	Matic
	TRIM28; TIF1B	Matic
	TRIM33	Matic
	VASP	Matic
	YLPM1	Matic
	ZBTB1	Matic
	ZBTB2	Matic
	ZBTB38	Matic
	ZBTB9	Matic
	ZMYM1	Matic
	ZMYM4	Matic
	ZMYM4	Matic
	ZMYND8	Matic
	ZNF280C	Matic
	ZNF280C	Matic
	ZNF295	Matic
	ZNF451	Matic
	ZNF800	Matic
	HIF-1	Matic2008
	SUMO-1	Matic2009
	SUMO-2	Matic2010
P46061		HSIAO	table 1
Q9UBT2		HSIAO	table 1
P23497		HSIAO	table 1
Q9UBT2		HSIAO	table 1
P04637		HSIAO	table 1
Q9UBT2		HSIAO	table 1
Q9UBT2		HSIAO	table 1
P46061		HSIAO	table 1
P23497		HSIAO	table 1
Q9UBT2		HSIAO	table 1
P61956		HSIAO	table 1
P23497		HSIAO	table 1
Q9UBT2		HSIAO	table 1
P61956		HSIAO	table 1
P04637		HSIAO	table 1
Q9UBT2		HSIAO	table 1
P61956		HSIAO	table 1
Q9UBT2		HSIAO	table 1
P61956		HSIAO	table 1
Q9UHP3		HSIAO	table 2
P61956		HSIAO	table 2
P46060		HSIAO	table 3
P46060		HSIAO	table 3
P63165		HSIAO	table 3
P61956		HSIAO	table 3
Q9HCK8		HSIAO	table 3
Q14204		HSIAO	table 3
P61956		HSIAO	table 3
P46060		HSIAO	table 3
P61956		HSIAO	table 3
P46060		HSIAO	table 3
P63165		HSIAO	table 3
P46060		HSIAO	table 3
P46060		HSIAO	table 3
P46060		HSIAO	table 3
P49748		HSIAO	table 3
P46060		HSIAO	table 3
P63165		HSIAO	table 3
P61956		HSIAO	table 3
P63165		HSIAO	table 3
P07814		HSIAO	table 3
P63165		HSIAO	table 3
P46060		HSIAO	table 3
P63279		HSIAO	table 3
P46060		HSIAO	table 3
P49792		HSIAO	table 3
Q7Z3J3		HSIAO	table 3
P63165		HSIAO	table 3
P61956		HSIAO	table 3
P46060		HSIAO	table 3
P61956		HSIAO	table 3
P46060		HSIAO	table 3
P46060		HSIAO	table 3
P46060		HSIAO	table 3
P46060		HSIAO	table 3
P46060		HSIAO	table 3
P46060		HSIAO	table 3
P46060		HSIAO	table 3
P49748		HSIAO	table 4
P46060		HSIAO	table 4
P46061		HSIAO	table 4
Q9UBT2		HSIAO	table 4
		Gallison	AS	IPI00171626
		Gallison	AS	IPI00171626
		Gallison	AS	IPI00171626
		Gallison	AS	IPI00790251
		Gallison	AS	IPI00790251
		Gallison	AS	IPI00790251
		Gallison	AS	IPI00790251
		Gallison	AS	IPI00790251
		Gallison	AS	IPI00790251
		Gallison	AS	IPI00790251
		Gallison	AS	IPI00790251
		Gallison	AS	IPI00790251
		Gallison	AS	IPI00790251
		Gallison	AS	IPI00790251
		Gallison	AS	IPI00790251
		Gallison	AS	IPI00790251
		Gallison	AS	IPI00790251
		Gallison	AS	IPI00790251
		Gallison	AS	IPI00790251
		Gallison	AS	IPI00790251
		Gallison	AS	IPI00790251
		Gallison	AS	IPI00790251
		Gallison	AS	IPI00790251
		Gallison	AS	IPI00003519
		Gallison	AS	IPI00003519
		Gallison	AS	IPI00003519
		Gallison	AS	IPI00003519
		Gallison	AS	IPI00003519
		Gallison	AS	IPI00021263
		Gallison	AS	IPI00021263
		Gallison	AS	IPI00027493
		Gallison	AS	IPI00027493
		Gallison	AS	IPI00027493
		Gallison	AS	IPI00027493
		Gallison	AS	IPI00465361
		Gallison	AS	IPI00465361
		Gallison	AS	IPI00465361
		Gallison	AS	IPI00470528
		Gallison	AS	IPI00470528
		Gallison	AS	IPI00470528
		Gallison	AS	IPI00470528
		Gallison	AS	IPI00470528
		Gallison	AS	IPI00025329
		Gallison	AS	IPI00025329
		Gallison	AS	IPI00456758
		Gallison	AS	IPI00456758
		Gallison	AS	IPI00456758
		Gallison	AS	IPI00456758
		Gallison	AS	IPI00456758
		Gallison	AS	IPI00456758
		Gallison	AS	IPI00878557
		Gallison	AS	IPI00878557
		Gallison	AS	IPI00878557
		Gallison	AS	IPI00878557
		Gallison	AS	IPI00878557
		Gallison	AS	IPI00878557
		Gallison	AS	IPI00878557
		Gallison	AS	IPI00878557
		Gallison	AS	IPI00878557
		Gallison	AS	IPI00878557
		Gallison	AS	IPI00878557
		Gallison	AS	IPI00878557
		Gallison	AS	IPI00878557
		Gallison	AS	IPI00878557
		Gallison	AS	IPI00878557
		Gallison	AS	IPI00878557
		Gallison	AS	IPI00878557
		Gallison	AS	IPI00878557
		Gallison	AS	IPI00878557
		Gallison	AS	IPI00878557
		Gallison	AS	IPI00878557
		Gallison	AS	IPI00878557
		Gallison	AS	IPI00878557
		Gallison	AS	IPI00878557
		Gallison	AS	IPI00878557
		Gallison	AS	IPI00878557
		Gallison	AS	IPI00878557
		Gallison	AS	IPI00878557
		Gallison	AS	IPI00878557
		Gallison	AS	IPI00878557
		Gallison	AS	IPI00878557
		Gallison	AS	IPI00878557
		Gallison	AS	IPI00878557
		Gallison	AS	IPI00878557
		Gallison	AS	IPI00878557
		Gallison	AS	IPI00878557
		Gallison	AS	IPI00878557
		Gallison	AS	IPI00878557
		Gallison	AS	IPI00878557
		Gallison	AS	IPI00878557
		Gallison	AS	IPI00878557
		Gallison	AS	IPI00878557
		Gallison	AS	IPI00878557
		Gallison	AS	IPI00878557
		Gallison	AS	IPI00878557
		Gallison	AS	IPI00878557
		Gallison	AS	IPI00878557
		Gallison	AS	IPI00878557
		Gallison	AS	IPI00878557
		Gallison	AS	IPI00878557
		Gallison	AS	IPI00021440
		Gallison	AS	IPI00021440
		Gallison	AS	IPI00021440
		Gallison	AS	IPI00021440
		Gallison	AS	IPI00021440
		Gallison	AS	IPI00021440
		Gallison	AS	IPI00021440
		Gallison	AS	IPI00007188
		Gallison	AS	IPI00007188
		Gallison	AS	IPI00007188
		Gallison	AS	IPI00007188
		Gallison	AS	IPI00007188
		Gallison	AS	IPI00024143
		Gallison	AS	IPI00024143
		Gallison	AS	IPI00024143
		Gallison	AS	IPI00024143
		Gallison	AS	IPI00024143
		Gallison	AS	IPI00024143
		Gallison	AS	IPI00013808
		Gallison	AS	IPI00013808
		Gallison	AS	IPI00013808
		Gallison	AS	IPI00706094
		Gallison	AS	IPI00706094
		Gallison	AS	IPI00706094
		Gallison	AS	IPI00294834
		Gallison	AS	IPI00294834
		Gallison	AS	IPI00294834
		Gallison	AS	IPI00294834
		Gallison	AS	IPI00294834
		Gallison	AS	IPI00294834
		Gallison	AS	IPI00294834
		Gallison	AS	IPI00220834
		Gallison	AS	IPI00220834
		Gallison	AS	IPI00844578
		Gallison	AS	IPI00844578
		Gallison	AS	IPI00844578
		Gallison	AS	IPI00844578
		Gallison	AS	IPI00844578
		Gallison	AS	IPI00844578
		Gallison	AS	IPI00844578
		Gallison	AS	IPI00844578
		Gallison	AS	IPI00844578
		Gallison	AS	IPI00844578
		Gallison	AS	IPI00844578
		Gallison	AS	IPI00844578
		Gallison	AS	IPI00844578
		Gallison	AS	IPI00844578
		Gallison	AS	IPI00301323
		Gallison	AS	IPI00301323
		Gallison	AS	IPI00477923
		Gallison	AS	IPI00477923
		Gallison	AS	IPI00477923
		Gallison	AS	IPI00477923
		Gallison	AS	IPI00477923
		Gallison	AS	IPI00477923
		Gallison	AS	IPI00477923
		Gallison	AS	IPI00477923
		Gallison	AS	IPI00477923
		Gallison	AS	IPI00218200
		Gallison	AS	IPI00218200
		Gallison	AS	IPI00218200
		Gallison	AS	IPI00218200
		Gallison	AS	IPI00218200
		Gallison	AS	IPI00218200
		Gallison	AS	IPI00218200
		Gallison	AS	IPI00218200
		Gallison	AS	IPI00218200
		Gallison	AS	IPI00218200
		Gallison	AS	IPI00218200
		Gallison	AS	IPI00218200
		Gallison	AS	IPI00218200
		Gallison	AS	IPI00218200
		Gallison	AS	IPI00218200
		Gallison	AS	IPI00218200
		Gallison	AS	IPI00218200
		Gallison	AS	IPI00218200
		Gallison	AS	IPI00218200
		Gallison	AS	IPI00218200
		Gallison	AS	IPI00103599
		Gallison	AS	IPI00103599
		Gallison	AS	IPI00103599
		Gallison	AS	IPI00027180
		Gallison	AS	IPI00027180
		Gallison	AS	IPI00025729
		Gallison	AS	IPI00025729
		Gallison	AS	IPI00025729
		Gallison	AS	IPI00021536
		Gallison	AS	IPI00021536
		Gallison	AS	IPI00478946
		Gallison	AS	IPI00478946
		Gallison	AS	IPI00478946
		Gallison	AS	IPI00478946
		Gallison	AS	IPI00478946
		Gallison	AS	IPI00478946
		Gallison	AS	IPI00478946
		Gallison	AS	IPI00478946
		Gallison	AS	IPI00478946
		Gallison	AS	IPI00478946
		Gallison	AS	IPI00478946
		Gallison	AS	IPI00478946
		Gallison	AS	IPI00478946
		Gallison	AS	IPI00478946
		Gallison	AS	IPI00478946
		Gallison	AS	IPI00218414
		Gallison	AS	IPI00218414
		Gallison	AS	IPI00884054
		Gallison	AS	IPI00884054
		Gallison	AS	IPI00884054
		Gallison	AS	IPI00884054
		Gallison	AS	IPI00884054
		Gallison	AS	IPI00884054
		Gallison	AS	IPI00884054
		Gallison	AS	IPI00884054
		Gallison	AS	IPI00884054
		Gallison	AS	IPI00884054
		Gallison	AS	IPI00010872
		Gallison	AS	IPI00010872
		Gallison	AS	IPI00010872
		Gallison	AS	IPI00010872
		Gallison	AS	IPI00010872
		Gallison	AS	IPI00010872
		Gallison	AS	IPI00010872
		Gallison	AS	IPI00010872
		Gallison	AS	IPI00010872
		Gallison	AS	IPI00010872
		Gallison	AS	IPI00010872
		Gallison	AS	IPI00010872
		Gallison	AS	IPI00010872
		Gallison	AS	IPI00010872
		Gallison	AS	IPI00010872
		Gallison	AS	IPI00010872
		Gallison	AS	IPI00010872
		Gallison	AS	IPI00010872
		Gallison	AS	IPI00010872
		Gallison	AS	IPI00010872
		Gallison	AS	IPI00010872
		Gallison	AS	IPI00010872
		Gallison	AS	IPI00010872
		Gallison	AS	IPI00010872
		Gallison	AS	IPI00010872
		Gallison	AS	IPI00010872
		Gallison	AS	IPI00010872
		Gallison	AS	IPI00010872
		Gallison	AS	IPI00010872
		Gallison	AS	IPI00010872
		Gallison	AS	IPI00010872
		Gallison	AS	IPI00010872
		Gallison	AS	IPI00010872
		Gallison	AS	IPI00010872
		Gallison	AS	IPI00010872
		Gallison	AS	IPI00010872
		Gallison	AS	IPI00010872
		Gallison	AS	IPI00010872
		Gallison	AS	IPI00010872
		Gallison	AS	IPI00010872
		Gallison	AS	IPI00010872
		Gallison	AS	IPI00010872
		Gallison	AS	IPI00010872
		Gallison	AS	IPI00010872
		Gallison	AS	IPI00010872
		Gallison	AS	IPI00010872
		Gallison	AS	IPI00010872
		Gallison	AS	IPI00010872
		Gallison	AS	IPI00010872
		Gallison	AS	IPI00010872
		Gallison	AS	IPI00306723
		Gallison	AS	IPI00306723
		Gallison	AS	IPI00306723
		Gallison	AS	IPI00306723
		Gallison	AS	IPI00306723
		Gallison	AS	IPI00306723
		Gallison	AS	IPI00306723
		Gallison	AS	IPI00009235
		Gallison	AS	IPI00009235
		Gallison	AS	IPI00009235
		Gallison	AS	IPI00009235
		Gallison	AS	IPI00910164
		Gallison	AS	IPI00910164
		Gallison	AS	IPI00910164
		Gallison	AS	IPI00910164
		Gallison	AS	IPI00910164
		Gallison	AS	IPI00295940
		Gallison	AS	IPI00295940
		Gallison	AS	IPI00295940
		Gallison	AS	IPI00295940
		Gallison	AS	IPI00295940
		Gallison	AS	IPI00295940
		Gallison	AS	IPI00295940
		Gallison	AS	IPI00295940
		Gallison	AS	IPI00295940
		Gallison	AS	IPI00295940
		Gallison	AS	IPI00020984
		Gallison	AS	IPI00020984
		Gallison	AS	IPI00020984
		Gallison	AS	IPI00020984
		Gallison	AS	IPI00020984
		Gallison	AS	IPI00020984
		Gallison	AS	IPI00020984
		Gallison	AS	IPI00020984
		Gallison	AS	IPI00020984
		Gallison	AS	IPI00020984
		Gallison	AS	IPI00020984
		Gallison	AS	IPI00020984
		Gallison	AS	IPI00020984
		Gallison	AS	IPI00020984
		Gallison	AS	IPI00020984
		Gallison	AS	IPI00020984
		Gallison	AS	IPI00020984
		Gallison	AS	IPI00910738
		Gallison	AS	IPI00910738
		Gallison	AS	IPI00297851
		Gallison	AS	IPI00297851
		Gallison	AS	IPI00297851
		Gallison	AS	IPI00297851
		Gallison	AS	IPI00297851
		Gallison	AS	IPI00297851
		Gallison	AS	IPI00297851
		Gallison	AS	IPI00297851
		Gallison	AS	IPI00297851
		Gallison	AS	IPI00297851
		Gallison	AS	IPI00297851
		Gallison	AS	IPI00297851
		Gallison	AS	IPI00297851
		Gallison	AS	IPI00297851
		Gallison	AS	IPI00297851
		Gallison	AS	IPI00297851
		Gallison	AS	IPI00297851
		Gallison	AS	IPI00297851
		Gallison	AS	IPI00297851
		Gallison	AS	IPI00297851
		Gallison	AS	IPI00297851
		Gallison	AS	IPI00552978
		Gallison	AS	IPI00552978
		Gallison	AS	IPI00552978
		Gallison	AS	IPI00552978
		Gallison	AS	IPI00552978
		Gallison	AS	IPI00552978
		Gallison	AS	IPI00552978
		Gallison	AS	IPI00552978
		Gallison	AS	IPI00552978
		Gallison	AS	IPI00299524
		Gallison	AS	IPI00299524
		Gallison	AS	IPI00220994
		Gallison	AS	IPI00220994
		Gallison	AS	IPI00220994
		Gallison	AS	IPI00030247
		Gallison	AS	IPI00030247
		Gallison	AS	IPI00030247
		Gallison	AS	IPI00030247
		Gallison	AS	IPI00030247
		Gallison	AS	IPI00030247
		Gallison	AS	IPI00030247
		Gallison	AS	IPI00030247
		Gallison	AS	IPI00030247
		Gallison	AS	IPI00030247
		Gallison	AS	IPI00030247
		Gallison	AS	IPI00030247
		Gallison	AS	IPI00030247
		Gallison	AS	IPI00030247
		Gallison	AS	IPI00030247
		Gallison	AS	IPI00030247
		Gallison	AS	IPI00030247
		Gallison	AS	IPI00030247
		Gallison	AS	IPI00030247
		Gallison	AS	IPI00030247
		Gallison	AS	IPI00030247
		Gallison	AS	IPI00030247
		Gallison	AS	IPI00030247
		Gallison	AS	IPI00030247
		Gallison	AS	IPI00030247
		Gallison	AS	IPI00030247
		Gallison	AS	IPI00030247
		Gallison	AS	IPI00030247
		Gallison	AS	IPI00030247
		Gallison	AS	IPI00030247
		Gallison	AS	IPI00030247
		Gallison	AS	IPI00030247
		Gallison	AS	IPI00030247
		Gallison	AS	IPI00030247
		Gallison	AS	IPI00030247
		Gallison	AS	IPI00030247
		Gallison	AS	IPI00030247
		Gallison	AS	IPI00030247
		Gallison	AS	IPI00030247
		Gallison	AS	IPI00465315
		Gallison	AS	IPI00465315
		Gallison	AS	IPI00465315
		Gallison	AS	IPI00029264
		Gallison	AS	IPI00029264
		Gallison	AS	IPI00456969
		Gallison	AS	IPI00456969
		Gallison	AS	IPI00456969
		Gallison	AS	IPI00015213
		Gallison	AS	IPI00015213
		Gallison	AS	IPI00550165
		Gallison	AS	IPI00550165
		Gallison	AS	IPI00290410
		Gallison	AS	IPI00290410
		Gallison	AS	IPI00003293
		Gallison	AS	IPI00003293
		Gallison	AS	IPI00106642
		Gallison	AS	IPI00106642
		Gallison	AS	IPI00106642
		Gallison	AS	IPI00106642
		Gallison	AS	IPI00106642
		Gallison	AS	IPI00106642
		Gallison	AS	IPI00106642
		Gallison	AS	IPI00106642
		Gallison	AS	IPI00008195
		Gallison	AS	IPI00008195
		Gallison	AS	IPI00008195
		Gallison	AS	IPI00008195
		Gallison	AS	IPI00008195
		Gallison	AS	IPI00008195
		Gallison	AS	IPI00008195
		Gallison	AS	IPI00008195
		Gallison	AS	IPI00008195
		Gallison	AS	IPI00008195
		Gallison	AS	IPI00008195
		Gallison	AS	IPI00413611
		Gallison	AS	IPI00413611
		Gallison	AS	IPI00413611
		Gallison	AS	IPI00413611
		Gallison	AS	IPI00413611
		Gallison	AS	IPI00413611
		Gallison	AS	IPI00413611
		Gallison	AS	IPI00413611
		Gallison	AS	IPI00413611
		Gallison	AS	IPI00413611
		Gallison	AS	IPI00413611
		Gallison	AS	IPI00413611
		Gallison	AS	IPI00413611
		Gallison	AS	IPI00413611
		Gallison	AS	IPI00413611
		Gallison	AS	IPI00413611
		Gallison	AS	IPI00413611
		Gallison	AS	IPI00413611
		Gallison	AS	IPI00413611
		Gallison	AS	IPI00413611
		Gallison	AS	IPI00413611
		Gallison	AS	IPI00413611
		Gallison	AS	IPI00025874
		Gallison	AS	IPI00025874
		Gallison	AS	IPI00025874
		Gallison	AS	IPI00025874
		Gallison	AS	IPI00025874
		Gallison	AS	IPI00025874
		Gallison	AS	IPI00025874
		Gallison	AS	IPI00025874
		Gallison	AS	IPI00025874
		Gallison	AS	IPI00025874
		Gallison	AS	IPI00025874
		Gallison	AS	IPI00025874
		Gallison	AS	IPI00025874
		Gallison	AS	IPI00025874
		Gallison	AS	IPI00025874
		Gallison	AS	IPI00025874
		Gallison	AS	IPI00025874
		Gallison	AS	IPI00025874
		Gallison	AS	IPI00025874
		Gallison	AS	IPI00025874
		Gallison	AS	IPI00025874
		Gallison	AS	IPI00025874
		Gallison	AS	IPI00025874
		Gallison	AS	IPI00025874
		Gallison	AS	IPI00025874
		Gallison	AS	IPI00844076
		Gallison	AS	IPI00844076
		Gallison	AS	IPI00844076
		Gallison	AS	IPI00844076
		Gallison	AS	IPI00844076
		Gallison	AS	IPI00844076
		Gallison	AS	IPI00844076
		Gallison	AS	IPI00844076
		Gallison	AS	IPI00844076
		Gallison	AS	IPI00844076
		Gallison	AS	IPI00844076
		Gallison	AS	IPI00297492
		Gallison	AS	IPI00297492
		Gallison	AS	IPI00152377
		Gallison	AS	IPI00152377
		Gallison	AS	IPI00152377
		Gallison	AS	IPI00297084
		Gallison	AS	IPI00297084
		Gallison	AS	IPI00297084
		Gallison	AS	IPI00002506
		Gallison	AS	IPI00002506
		Gallison	AS	IPI00221325
		Gallison	AS	IPI00221325
		Gallison	AS	IPI00221325
		Gallison	AS	IPI00221325
		Gallison	AS	IPI00221325
		Gallison	AS	IPI00221325
		Gallison	AS	IPI00221325
		Gallison	AS	IPI00221325
		Gallison	AS	IPI00221325
		Gallison	AS	IPI00221325
		Gallison	AS	IPI00221325
		Gallison	AS	IPI00221325
		Gallison	AS	IPI00221325
		Gallison	AS	IPI00290429
		Gallison	AS	IPI00290429
		Gallison	AS	IPI00290429
		Gallison	AS	IPI00290429
		Gallison	AS	IPI00290429
		Gallison	AS	IPI00290429
		Gallison	AS	IPI00290429
		Gallison	AS	IPI00026993
		Gallison	AS	IPI00026993
		Gallison	AS	IPI00217918
		Gallison	AS	IPI00217918
		Gallison	AS	IPI00007940
		Gallison	AS	IPI00007940
		Gallison	AS	IPI00007940
		Gallison	AS	IPI00007940
		Gallison	AS	IPI00007676
		Gallison	AS	IPI00007676
		Gallison	AS	IPI00007676
		Gallison	AS	IPI00007676
		Gallison	AS	IPI00016910
		Gallison	AS	IPI00016910
		Gallison	AS	IPI00298961
		Gallison	AS	IPI00298961
		Gallison	AS	IPI00298961
		Gallison	AS	IPI00298961
		Gallison	AS	IPI00026970
		Gallison	AS	IPI00026970
		Gallison	AS	IPI00026970
		Gallison	AS	IPI00026970
		Gallison	AS	IPI00026970
		Gallison	AS	IPI00026970
		Gallison	AS	IPI00026970
		Gallison	AS	IPI00026970
		Gallison	AS	IPI00026970
		Gallison	AS	IPI00026781
		Gallison	AS	IPI00026781
		Gallison	AS	IPI00026256
		Gallison	AS	IPI00026256
		Gallison	AS	IPI00397801
		Gallison	AS	IPI00397801
		Gallison	AS	IPI00397801
		Gallison	AS	IPI00397801
		Gallison	AS	IPI00397801
		Gallison	AS	IPI00397801
		Gallison	AS	IPI00397801
		Gallison	AS	IPI00397801
		Gallison	AS	IPI00030319
		Gallison	AS	IPI00030319
		Gallison	AS	IPI00024386
		Gallison	AS	IPI00024386
		Gallison	AS	IPI00024386
		Gallison	AS	IPI00024386
		Gallison	AS	IPI00024386
		Gallison	AS	IPI00024386
		Gallison	AS	IPI00024386
		Gallison	AS	IPI00024386
		Gallison	AS	IPI00457284
		Gallison	AS	IPI00457284
		Gallison	AS	IPI00457284
		Gallison	AS	IPI00457284
		Gallison	AS	IPI00457284
		Gallison	AS	IPI00457284
		Gallison	AS	IPI00457284
		Gallison	AS	IPI00457284
		Gallison	AS	IPI00457284
		Gallison	AS	IPI00457284
		Gallison	AS	IPI00457284
		Gallison	AS	IPI00457284
		Gallison	AS	IPI00457284
		Gallison	AS	IPI00457284
		Gallison	AS	IPI00457284
		Gallison	AS	IPI00457284
		Gallison	AS	IPI00457284
		Gallison	AS	IPI00457284
		Gallison	AS	IPI00457284
		Gallison	AS	IPI00457284
		Gallison	AS	IPI00457284
		Gallison	AS	IPI00457284
		Gallison	AS	IPI00457284
		Gallison	AS	IPI00457284
		Gallison	AS	IPI00457284
		Gallison	AS	IPI00457284
		Gallison	AS	IPI00457284
		Gallison	AS	IPI00457284
		Gallison	AS	IPI00457284
		Gallison	AS	IPI00457284
		Gallison	AS	IPI00457284
		Gallison	AS	IPI00457284
		Gallison	AS	IPI00457284
		Gallison	AS	IPI00457284
		Gallison	AS	IPI00457284
		Gallison	AS	IPI00457284
		Gallison	AS	IPI00457284
		Gallison	AS	IPI00457284
		Gallison	AS	IPI00457284
		Gallison	AS	IPI00221394
		Gallison	AS	IPI00221394
		Gallison	AS	IPI00221394
		Gallison	AS	IPI00024279
		Gallison	AS	IPI00024279
		Gallison	AS	IPI00024279
		Gallison	AS	IPI00024279
		Gallison	AS	IPI00024279
		Gallison	AS	IPI00024279
		Gallison	AS	IPI00024279
		Gallison	AS	IPI00024279
		Gallison	AS	IPI00024279
		Gallison	AS	IPI00024279
		Gallison	AS	IPI00024279
		Gallison	AS	IPI00024279
		Gallison	AS	IPI00024279
		Gallison	AS	IPI00024279
		Gallison	AS	IPI00024279
		Gallison	AS	IPI00024279
		Gallison	AS	IPI00304925
		Gallison	AS	IPI00304925
		Gallison	AS	IPI00304925
		Gallison	AS	IPI00304925
		Gallison	AS	IPI00013881
		Gallison	AS	IPI00013881
		Gallison	AS	IPI00013881
		Gallison	AS	IPI00027834
		Gallison	AS	IPI00027834
		Gallison	AS	IPI00027834
		Gallison	AS	IPI00027834
		Gallison	AS	IPI00027834
		Gallison	AS	IPI00027834
		Gallison	AS	IPI00027834
		Gallison	AS	IPI00027834
		Gallison	AS	IPI00027834
		Gallison	AS	IPI00027834
		Gallison	AS	IPI00027834
		Gallison	AS	IPI00217465
		Gallison	AS	IPI00217465
		Gallison	AS	IPI00217465
		Gallison	AS	IPI00291764
		Gallison	AS	IPI00291764
		Gallison	AS	IPI00291764
		Gallison	AS	IPI00291764
		Gallison	AS	IPI00291764
		Gallison	AS	IPI00291764
		Gallison	AS	IPI00291764
		Gallison	AS	IPI00291764
		Gallison	AS	IPI00018278
		Gallison	AS	IPI00018278
		Gallison	AS	IPI00220403
		Gallison	AS	IPI00220403
		Gallison	AS	IPI00220403
		Gallison	AS	IPI00220403
		Gallison	AS	IPI00220403
		Gallison	AS	IPI00220403
		Gallison	AS	IPI00171611
		Gallison	AS	IPI00171611
		Gallison	AS	IPI00171611
		Gallison	AS	IPI00453473
		Gallison	AS	IPI00453473
		Gallison	AS	IPI00453473
		Gallison	AS	IPI00472151
		Gallison	AS	IPI00472151
		Gallison	AS	IPI00016928
		Gallison	AS	IPI00016928
		Gallison	AS	IPI00016928
		Gallison	AS	IPI00018974
		Gallison	AS	IPI00018974
		Gallison	AS	IPI00018974
		Gallison	AS	IPI00010744
		Gallison	AS	IPI00010744
		Gallison	AS	IPI00027682
		Gallison	AS	IPI00027682
		Gallison	AS	IPI00398625
		Gallison	AS	IPI00398625
		Gallison	AS	IPI00398625
		Gallison	AS	IPI00398625
		Gallison	AS	IPI00398625
		Gallison	AS	IPI00398625
		Gallison	AS	IPI00398625
		Gallison	AS	IPI00398625
		Gallison	AS	IPI00398625
		Gallison	AS	IPI00398625
		Gallison	AS	IPI00398625
		Gallison	AS	IPI00398625
		Gallison	AS	IPI00398625
		Gallison	AS	IPI00398625
		Gallison	AS	IPI00398625
		Gallison	AS	IPI00398625
		Gallison	AS	IPI00398625
		Gallison	AS	IPI00398625
		Gallison	AS	IPI00398625
		Gallison	AS	IPI00398625
		Gallison	AS	IPI00398625
		Gallison	AS	IPI00398625
		Gallison	AS	IPI00398625
		Gallison	AS	IPI00398625
		Gallison	AS	IPI00001639
		Gallison	AS	IPI00001639
		Gallison	AS	IPI00001639
		Gallison	AS	IPI00001639
		Gallison	AS	IPI00185146
		Gallison	AS	IPI00185146
		Gallison	AS	IPI00032491
		Gallison	AS	IPI00032491
		Gallison	AS	IPI00032491
		Gallison	AS	IPI00032491
		Gallison	AS	IPI00032491
		Gallison	AS	IPI00032491
		Gallison	AS	IPI00032491
		Gallison	AS	IPI00032491
		Gallison	AS	IPI00032491
		Gallison	AS	IPI00032491
		Gallison	AS	IPI00032491
		Gallison	AS	IPI00032491
		Gallison	AS	IPI00291607
		Gallison	AS	IPI00291607
		Gallison	AS	IPI00291607
		Gallison	AS	IPI00418313
		Gallison	AS	IPI00418313
		Gallison	AS	IPI00297572
		Gallison	AS	IPI00297572
		Gallison	AS	IPI00297572
		Gallison	AS	IPI00797572
		Gallison	AS	IPI00797572
		Gallison	AS	IPI00163085
		Gallison	AS	IPI00163085
		Gallison	AS	IPI00163085
		Gallison	AS	IPI00163085
		Gallison	AS	IPI00163085
		Gallison	AS	IPI00163085
		Gallison	AS	IPI00163085
		Gallison	AS	IPI00163085
		Gallison	AS	IPI00163085
		Gallison	AS	IPI00163085
		Gallison	AS	IPI00163085
		Gallison	AS	IPI00163085
		Gallison	AS	IPI00163085
		Gallison	AS	IPI00163085
		Gallison	AS	IPI00163085
		Gallison	AS	IPI00163085
		Gallison	AS	IPI00163085
		Gallison	AS	IPI00163085
		Gallison	AS	IPI00878014
		Gallison	AS	IPI00878014
		Gallison	AS	IPI00878014
		Gallison	AS	IPI00007334
		Gallison	AS	IPI00007334
		Gallison	AS	IPI00007334
		Gallison	AS	IPI00185027
		Gallison	AS	IPI00185027
		Gallison	AS	IPI00185027
		Gallison	AS	IPI00185027
		Gallison	AS	IPI00185027
		Gallison	AS	IPI00185027
		Gallison	AS	IPI00185027
		Gallison	AS	IPI00185027
		Gallison	AS	IPI00185027
		Gallison	AS	IPI00185027
		Gallison	AS	IPI00185027
		Gallison	AS	IPI00185027
		Gallison	AS	IPI00185027
		Gallison	AS	IPI00470537
		Gallison	AS	IPI00470537
		Gallison	AS	IPI00306748
		Gallison	AS	IPI00306748
		Gallison	AS	IPI00002372
		Gallison	AS	IPI00002372
		Gallison	AS	IPI00002372
		Gallison	AS	IPI00409671
		Gallison	AS	IPI00409671
		Gallison	AS	IPI00747002
		Gallison	AS	IPI00747002
		Gallison	AS	IPI00747002
		Gallison	AS	IPI00747002
		Gallison	AS	IPI00747002
		Gallison	AS	IPI00747002
		Gallison	AS	IPI00747002
		Gallison	AS	IPI00747002
		Gallison	AS	IPI00747002
		Gallison	AS	IPI00747002
		Gallison	AS	IPI00218019
		Gallison	AS	IPI00218019
		Gallison	AS	IPI00218019
		Gallison	AS	IPI00218019
		Gallison	AS	IPI00337426
		Gallison	AS	IPI00337426
		Gallison	AS	IPI00337426
		Gallison	AS	IPI00337426
		Gallison	AS	IPI00337426
		Gallison	AS	IPI00337426
		Gallison	AS	IPI00337426
		Gallison	AS	IPI00337426
		Gallison	AS	IPI00337426
		Gallison	AS	IPI00337426
		Gallison	AS	IPI00337426
		Gallison	AS	IPI00337426
		Gallison	AS	IPI00337426
		Gallison	AS	IPI00337426
		Gallison	AS	IPI00337426
		Gallison	AS	IPI00337426
		Gallison	AS	IPI00337426
		Gallison	AS	IPI00337426
		Gallison	AS	IPI00069817
		Gallison	AS	IPI00069817
		Gallison	AS	IPI00440727
		Gallison	AS	IPI00440727
		Gallison	AS	IPI00440727
		Gallison	AS	IPI00440727
		Gallison	AS	IPI00440727
		Gallison	AS	IPI00440727
		Gallison	AS	IPI00440727
		Gallison	AS	IPI00440727
		Gallison	AS	IPI00440727
		Gallison	AS	IPI00440727
		Gallison	AS	IPI00440727
		Gallison	AS	IPI00440727
		Gallison	AS	IPI00440727
		Gallison	AS	IPI00440727
		Gallison	AS	IPI00440727
		Gallison	AS	IPI00440727
		Gallison	AS	IPI00440727
		Gallison	AS	IPI00440727
		Gallison	AS	IPI00440727
		Gallison	AS	IPI00440727
		Gallison	AS	IPI00440727
		Gallison	AS	IPI00440727
		Gallison	AS	IPI00001707
		Gallison	AS	IPI00001707
		Gallison	AS	IPI00001707
		Gallison	AS	IPI00645518
		Gallison	AS	IPI00645518
		Gallison	AS	IPI00815893
		Gallison	AS	IPI00815893
		Gallison	AS	IPI00815893
		Gallison	AS	IPI00815893
		Gallison	AS	IPI00815893
		Gallison	AS	IPI00815893
		Gallison	AS	IPI00815893
		Gallison	AS	IPI00815893
		Gallison	AS	IPI00815893
		Gallison	AS	IPI00815893
		Gallison	AS	IPI00815893
		Gallison	AS	IPI00815893
		Gallison	AS	IPI00815893
		Gallison	AS	IPI00815893
		Gallison	AS	IPI00815893
		Gallison	AS	IPI00815893
		Gallison	AS	IPI00815893
		Gallison	AS	IPI00815893
		Gallison	AS	IPI00815893
		Gallison	AS	IPI00815893
		Gallison	AS	IPI00815893
		Gallison	AS	IPI00815893
		Gallison	AS	IPI00815893
		Gallison	AS	IPI00815893
		Gallison	AS	IPI00815893
		Gallison	AS	IPI00815893
		Gallison	AS	IPI00000846
		Gallison	AS	IPI00000846
		Gallison	AS	IPI00000846
		Gallison	AS	IPI00000846
		Gallison	AS	IPI00000846
		Gallison	AS	IPI00000846
		Gallison	AS	IPI00000846
		Gallison	AS	IPI00000846
		Gallison	AS	IPI00000846
		Gallison	AS	IPI00000846
		Gallison	AS	IPI00239815
		Gallison	AS	IPI00239815
		Gallison	AS	IPI00239815
		Gallison	AS	IPI00239815
		Gallison	AS	IPI00239815
		Gallison	AS	IPI00239815
		Gallison	AS	IPI00239815
		Gallison	AS	IPI00024067
		Gallison	AS	IPI00024067
		Gallison	AS	IPI00024067
		Gallison	AS	IPI00024067
		Gallison	AS	IPI00024067
		Gallison	AS	IPI00024067
		Gallison	AS	IPI00024067
		Gallison	AS	IPI00871686
		Gallison	AS	IPI00871686
		Gallison	AS	IPI00394751
		Gallison	AS	IPI00394751
		Gallison	AS	IPI00394751
		Gallison	AS	IPI00394751
		Gallison	AS	IPI00394751
		Gallison	AS	IPI00100160
		Gallison	AS	IPI00100160
		Gallison	AS	IPI00654682
		Gallison	AS	IPI00654682
		Gallison	AS	IPI00654682
		Gallison	AS	IPI00375652
		Gallison	AS	IPI00375652
		Gallison	AS	IPI00375652
		Gallison	AS	IPI00031519
		Gallison	AS	IPI00031519
		Gallison	AS	IPI00329216
		Gallison	AS	IPI00329216
		Gallison	AS	IPI00478232
		Gallison	AS	IPI00478232
		Gallison	AS	IPI00478232
		Gallison	AS	IPI00478232
		Gallison	AS	IPI00478232
		Gallison	AS	IPI00478232
		Gallison	AS	IPI00478232
		Gallison	AS	IPI00478232
		Gallison	AS	IPI00296337
		Gallison	AS	IPI00296337
		Gallison	AS	IPI00296337
		Gallison	AS	IPI00296337
		Gallison	AS	IPI00296337
		Gallison	AS	IPI00296337
		Gallison	AS	IPI00296337
		Gallison	AS	IPI00296337
		Gallison	AS	IPI00296337
		Gallison	AS	IPI00296337
		Gallison	AS	IPI00296337
		Gallison	AS	IPI00296337
		Gallison	AS	IPI00296337
		Gallison	AS	IPI00296337
		Gallison	AS	IPI00296337
		Gallison	AS	IPI00296337
		Gallison	AS	IPI00296337
		Gallison	AS	IPI00296337
		Gallison	AS	IPI00296337
		Gallison	AS	IPI00296337
		Gallison	AS	IPI00296337
		Gallison	AS	IPI00296337
		Gallison	AS	IPI00296337
		Gallison	AS	IPI00296337
		Gallison	AS	IPI00296337
		Gallison	AS	IPI00296337
		Gallison	AS	IPI00296337
		Gallison	AS	IPI00296337
		Gallison	AS	IPI00296337
		Gallison	AS	IPI00296337
		Gallison	AS	IPI00296337
		Gallison	AS	IPI00296337
		Gallison	AS	IPI00296337
		Gallison	AS	IPI00296337
		Gallison	AS	IPI00296337
		Gallison	AS	IPI00296337
		Gallison	AS	IPI00296337
		Gallison	AS	IPI00296337
		Gallison	AS	IPI00219250
		Gallison	AS	IPI00219250
		Gallison	AS	IPI00219250
		Gallison	AS	IPI00219250
		Gallison	AS	IPI00219250
		Gallison	AS	IPI00219250
		Gallison	AS	IPI00219250
		Gallison	AS	IPI00219250
		Gallison	AS	IPI00219250
		Gallison	AS	IPI00219250
		Gallison	AS	IPI00219250
		Gallison	AS	IPI00219250
		Gallison	AS	IPI00219250
		Gallison	AS	IPI00219250
		Gallison	AS	IPI00219250
		Gallison	AS	IPI00219250
		Gallison	AS	IPI00219250
		Gallison	AS	IPI00219250
		Gallison	AS	IPI00219250
		Gallison	AS	IPI00219250
		Gallison	AS	IPI00219250
		Gallison	AS	IPI00219250
		Gallison	AS	IPI00219250
		Gallison	AS	IPI00219250
		Gallison	AS	IPI00219250
		Gallison	AS	IPI00219250
		Gallison	AS	IPI00640703
		Gallison	AS	IPI00640703
		Gallison	AS	IPI00640703
		Gallison	AS	IPI00640703
		Gallison	AS	IPI00640703
		Gallison	AS	IPI00640703
		Gallison	AS	IPI00075081
		Gallison	AS	IPI00075081
		Gallison	AS	IPI00075081
		Gallison	AS	IPI00075081
		Gallison	AS	IPI00019447
		Gallison	AS	IPI00019447
		Gallison	AS	IPI00019447
		Gallison	AS	IPI00019447
		Gallison	AS	IPI00333619
		Gallison	AS	IPI00333619
		Gallison	AS	IPI00010426
		Gallison	AS	IPI00010426
		Gallison	AS	IPI00010426
		Gallison	AS	IPI00010426
		Gallison	AS	IPI00010426
		Gallison	AS	IPI00010426
		Gallison	AS	IPI00010426
		Gallison	AS	IPI00010426
		Gallison	AS	IPI00010426
		Gallison	AS	IPI00010426
		Gallison	AS	IPI00010426
		Gallison	AS	IPI00010426
		Gallison	AS	IPI00010426
		Gallison	AS	IPI00010426
		Gallison	AS	IPI00010426
		Gallison	AS	IPI00015806
		Gallison	AS	IPI00015806
		Gallison	AS	IPI00015806
		Gallison	AS	IPI00054042
		Gallison	AS	IPI00054042
		Gallison	AS	IPI00054042
		Gallison	AS	IPI00054042
		Gallison	AS	IPI00054042
		Gallison	AS	IPI00054042
		Gallison	AS	IPI00054042
		Gallison	AS	IPI00054042
		Gallison	AS	IPI00054042
		Gallison	AS	IPI00457114
		Gallison	AS	IPI00457114
		Gallison	AS	IPI00457114
		Gallison	AS	IPI00457114
		Gallison	AS	IPI00457114
		Gallison	AS	IPI00457114
		Gallison	AS	IPI00457114
		Gallison	AS	IPI00457114
		Gallison	AS	IPI00457114
		Gallison	AS	IPI00457114
		Gallison	AS	IPI00457114
		Gallison	AS	IPI00457114
		Gallison	AS	IPI00457114
		Gallison	AS	IPI00457114
		Gallison	AS	IPI00457114
		Gallison	AS	IPI00457114
		Gallison	AS	IPI00457114
		Gallison	AS	IPI00457114
		Gallison	AS	IPI00457114
		Gallison	AS	IPI00457114
		Gallison	AS	IPI00457114
		Gallison	AS	IPI00457114
		Gallison	AS	IPI00457114
		Gallison	AS	IPI00457114
		Gallison	AS	IPI00457114
		Gallison	AS	IPI00457114
		Gallison	AS	IPI00457114
		Gallison	AS	IPI00457114
		Gallison	AS	IPI00477227
		Gallison	AS	IPI00477227
		Gallison	AS	IPI00741005
		Gallison	AS	IPI00741005
		Gallison	AS	IPI00741005
		Gallison	AS	IPI00741005
		Gallison	AS	IPI00741005
		Gallison	AS	IPI00741005
		Gallison	AS	IPI00741005
		Gallison	AS	IPI00741005
		Gallison	AS	IPI00741005
		Gallison	AS	IPI00152441
		Gallison	AS	IPI00152441
		Gallison	AS	IPI00152441
		Gallison	AS	IPI00293746
		Gallison	AS	IPI00293746
		Gallison	AS	IPI00293746
		Gallison	AS	IPI00293746
		Gallison	AS	IPI00005024
		Gallison	AS	IPI00005024
		Gallison	AS	IPI00005024
		Gallison	AS	IPI00005024
		Gallison	AS	IPI00005024
		Gallison	AS	IPI00005024
		Gallison	AS	IPI00005024
		Gallison	AS	IPI00005024
		Gallison	AS	IPI00005024
		Gallison	AS	IPI00005024
		Gallison	AS	IPI00005024
		Gallison	AS	IPI00005024
		Gallison	AS	IPI00005024
		Gallison	AS	IPI00005024
		Gallison	AS	IPI00005024
		Gallison	AS	IPI00005024
		Gallison	AS	IPI00005024
		Gallison	AS	IPI00005024
		Gallison	AS	IPI00005024
		Gallison	AS	IPI00005024
		Gallison	AS	IPI00005024
		Gallison	AS	IPI00397526
		Gallison	AS	IPI00397526
		Gallison	AS	IPI00397526
		Gallison	AS	IPI00019502
		Gallison	AS	IPI00019502
		Gallison	AS	IPI00019502
		Gallison	AS	IPI00019502
		Gallison	AS	IPI00019502
		Gallison	AS	IPI00019502
		Gallison	AS	IPI00019502
		Gallison	AS	IPI00019502
		Gallison	AS	IPI00019502
		Gallison	AS	IPI00442274
		Gallison	AS	IPI00442274
		Gallison	AS	IPI00436632
		Gallison	AS	IPI00436632
		Gallison	AS	IPI00436632
		Gallison	AS	IPI00026625
		Gallison	AS	IPI00026625
		Gallison	AS	IPI00026625
		Gallison	AS	IPI00291755
		Gallison	AS	IPI00291755
		Gallison	AS	IPI00291755
		Gallison	AS	IPI00291755
		Gallison	AS	IPI00291755
		Gallison	AS	IPI00291755
		Gallison	AS	IPI00291755
		Gallison	AS	IPI00291755
		Gallison	AS	IPI00291755
		Gallison	AS	IPI00291755
		Gallison	AS	IPI00291755
		Gallison	AS	IPI00291755
		Gallison	AS	IPI00291755
		Gallison	AS	IPI00291755
		Gallison	AS	IPI00022613
		Gallison	AS	IPI00022613
		Gallison	AS	IPI00022613
		Gallison	AS	IPI00022613
		Gallison	AS	IPI00022613
		Gallison	AS	IPI00022613
		Gallison	AS	IPI00022613
		Gallison	AS	IPI00022613
		Gallison	AS	IPI00022613
		Gallison	AS	IPI00022613
		Gallison	AS	IPI00022613
		Gallison	AS	IPI00022613
		Gallison	AS	IPI00022613
		Gallison	AS	IPI00022613
		Gallison	AS	IPI00022613
		Gallison	AS	IPI00022613
		Gallison	AS	IPI00022613
		Gallison	AS	IPI00549248
		Gallison	AS	IPI00549248
		Gallison	AS	IPI00549248
		Gallison	AS	IPI00549248
		Gallison	AS	IPI00301647
		Gallison	AS	IPI00301647
		Gallison	AS	IPI00301647
		Gallison	AS	IPI00386760
		Gallison	AS	IPI00386760
		Gallison	AS	IPI00386760
		Gallison	AS	IPI00386760
		Gallison	AS	IPI00395568
		Gallison	AS	IPI00395568
		Gallison	AS	IPI00789041
		Gallison	AS	IPI00789041
		Gallison	AS	IPI00789041
		Gallison	AS	IPI00218528
		Gallison	AS	IPI00218528
		Gallison	AS	IPI00218528
		Gallison	AS	IPI00384202
		Gallison	AS	IPI00384202
		Gallison	AS	IPI00552849
		Gallison	AS	IPI00552849
		Gallison	AS	IPI00552849
		Gallison	AS	IPI00552849
		Gallison	AS	IPI00552849
		Gallison	AS	IPI00552849
		Gallison	AS	IPI00552849
		Gallison	AS	IPI00552849
		Gallison	AS	IPI00552849
		Gallison	AS	IPI00552849
		Gallison	AS	IPI00552849
		Gallison	AS	IPI00552849
		Gallison	AS	IPI00552849
		Gallison	AS	IPI00552849
		Gallison	AS	IPI00552849
		Gallison	AS	IPI00552849
		Gallison	AS	IPI00552849
		Gallison	AS	IPI00552849
		Gallison	AS	IPI00552849
		Gallison	AS	IPI00552849
		Gallison	AS	IPI00028369
		Gallison	AS	IPI00028369
		Gallison	AS	IPI00056319
		Gallison	AS	IPI00056319
		Gallison	AS	IPI00783943
		Gallison	AS	IPI00783943
		Gallison	AS	IPI00783943
		Gallison	AS	IPI00783943
		Gallison	AS	IPI00783943
		Gallison	AS	IPI00783943
		Gallison	AS	IPI00783943
		Gallison	AS	IPI00783943
		Gallison	AS	IPI00783943
		Gallison	AS	IPI00783943
		Gallison	AS	IPI00783943
		Gallison	AS	IPI00295502
		Gallison	AS	IPI00295502
		Gallison	AS	IPI00295502
		Gallison	AS	IPI00295502
		Gallison	AS	IPI00295502
		Gallison	AS	IPI00295502
		Gallison	AS	IPI00295502
		Gallison	AS	IPI00295502
		Gallison	AS	IPI00295502
		Gallison	AS	IPI00295502
		Gallison	AS	IPI00339384
		Gallison	AS	IPI00339384
		Gallison	AS	IPI00852584
		Gallison	AS	IPI00852584
		Gallison	AS	IPI00852584
		Gallison	AS	IPI00852584
		Gallison	AS	IPI00852584
		Gallison	AS	IPI00852584
		Gallison	AS	IPI00852584
		Gallison	AS	IPI00852584
		Gallison	AS	IPI00852584
		Gallison	AS	IPI00852584
		Gallison	AS	IPI00852584
		Gallison	AS	IPI00852584
		Gallison	AS	IPI00852584
		Gallison	AS	IPI00852584
		Gallison	AS	IPI00852584
		Gallison	AS	IPI00852584
		Gallison	AS	IPI00852584
		Gallison	AS	IPI00852584
		Gallison	AS	IPI00852584
		Gallison	AS	IPI00852584
		Gallison	AS	IPI00852584
		Gallison	AS	IPI00852584
		Gallison	AS	IPI00852584
		Gallison	AS	IPI00852584
		Gallison	AS	IPI00852584
		Gallison	AS	IPI00852584
		Gallison	AS	IPI00852584
		Gallison	AS	IPI00852584
		Gallison	AS	IPI00852584
		Gallison	AS	IPI00852584
		Gallison	AS	IPI00852584
		Gallison	AS	IPI00852584
		Gallison	AS	IPI00852584
		Gallison	AS	IPI00852584
		Gallison	AS	IPI00852584
		Gallison	AS	IPI00852584
		Gallison	AS	IPI00852584
		Gallison	AS	IPI00852584
		Gallison	AS	IPI00852584
		Gallison	AS	IPI00852584
		Gallison	AS	IPI00852584
		Gallison	AS	IPI00792743
		Gallison	AS	IPI00792743
		Gallison	AS	IPI00792743
		Gallison	AS	IPI00792743
		Gallison	AS	IPI00914975
		Gallison	AS	IPI00914975
		Gallison	AS	IPI00914975
		Gallison	AS	IPI00914975
		Gallison	AS	IPI00914975
		Gallison	AS	IPI00914975
		Gallison	AS	IPI00914975
		Gallison	AS	IPI00914975
		Gallison	AS	IPI00914975
		Gallison	AS	IPI00914975
		Gallison	AS	IPI00914975
		Gallison	AS	IPI00914975
		Gallison	AS	IPI00914975
		Gallison	AS	IPI00914975
		Gallison	AS	IPI00914975
		Gallison	AS	IPI00914975
		Gallison	AS	IPI00240812
		Gallison	AS	IPI00240812
		Gallison	AS	IPI00240812
		Gallison	AS	IPI00240812
		Gallison	AS	IPI00216047
		Gallison	AS	IPI00216047
		Gallison	AS	IPI00216047
		Gallison	AS	IPI00216047
		Gallison	AS	IPI00216047
		Gallison	AS	IPI00216047
		Gallison	AS	IPI00216047
		Gallison	AS	IPI00216047
		Gallison	AS	IPI00216047
		Gallison	AS	IPI00017669
		Gallison	AS	IPI00017669
		Gallison	AS	IPI00023344
		Gallison	AS	IPI00023344
		Gallison	AS	IPI00023344
		Gallison	AS	IPI00100656
		Gallison	AS	IPI00100656
		Gallison	AS	IPI00100656
		Gallison	AS	IPI00100656
		Gallison	AS	IPI00100656
		Gallison	AS	IPI00100656
		Gallison	AS	IPI00021493
		Gallison	AS	IPI00021493
		Gallison	AS	IPI00024236
		Gallison	AS	IPI00024236
		Gallison	AS	IPI00024236
		Gallison	AS	IPI00024236
		Gallison	AS	IPI00024236
		Gallison	AS	IPI00024236
		Gallison	AS	IPI00024236
		Gallison	AS	IPI00024236
		Gallison	AS	IPI00024236
		Gallison	AS	IPI00024236
		Gallison	AS	IPI00024236
		Gallison	AS	IPI00024236
		Gallison	AS	IPI00438229
		Gallison	AS	IPI00438229
		Gallison	AS	IPI00438229
		Gallison	AS	IPI00438229
		Gallison	AS	IPI00438229
		Gallison	AS	IPI00438229
		Gallison	AS	IPI00438229
		Gallison	AS	IPI00438229
		Gallison	AS	IPI00438229
		Gallison	AS	IPI00438229
		Gallison	AS	IPI00438229
		Gallison	AS	IPI00438229
		Gallison	AS	IPI00438229
		Gallison	AS	IPI00438229
		Gallison	AS	IPI00438229
		Gallison	AS	IPI00438229
		Gallison	AS	IPI00438229
		Gallison	AS	IPI00438229
		Gallison	AS	IPI00438229
		Gallison	AS	IPI00438229
		Gallison	AS	IPI00438229
		Gallison	AS	IPI00438229
		Gallison	AS	IPI00438229
		Gallison	AS	IPI00438229
		Gallison	AS	IPI00438229
		Gallison	AS	IPI00438229
		Gallison	AS	IPI00438229
		Gallison	AS	IPI00438229
		Gallison	AS	IPI00438229
		Gallison	AS	IPI00438229
		Gallison	AS	IPI00438229
		Gallison	AS	IPI00438229
		Gallison	AS	IPI00301610
		Gallison	AS	IPI00301610
		Gallison	AS	IPI00015924
		Gallison	AS	IPI00015924
		Gallison	AS	IPI00015924
		Gallison	AS	IPI00029778
		Gallison	AS	IPI00029778
		Gallison	AS	IPI00029778
		Gallison	AS	IPI00029778
		Gallison	AS	IPI00029778
		Gallison	AS	IPI00029778
		Gallison	AS	IPI00029778
		Gallison	AS	IPI00029778
		Gallison	AS	IPI00029778
		Gallison	AS	IPI00029778
		Gallison	AS	IPI00029778
		Gallison	AS	IPI00029778
		Gallison	AS	IPI00029778
		Gallison	AS	IPI00029778
		Gallison	AS	IPI00029778
		Gallison	AS	IPI00029778
		Gallison	AS	IPI00029778
		Gallison	AS	IPI00420014
		Gallison	AS	IPI00420014
		Gallison	AS	IPI00420014
		Gallison	AS	IPI00420014
		Gallison	AS	IPI00420014
		Gallison	AS	IPI00420014
		Gallison	AS	IPI00420014
		Gallison	AS	IPI00420014
		Gallison	AS	IPI00420014
		Gallison	AS	IPI00420014
		Gallison	AS	IPI00420014
		Gallison	AS	IPI00420014
		Gallison	AS	IPI00420014
		Gallison	AS	IPI00297593
		Gallison	AS	IPI00297593
		Gallison	AS	IPI00297593
		Gallison	AS	IPI00297593
		Gallison	AS	IPI00297593
		Gallison	AS	IPI00297593
		Gallison	AS	IPI00297593
		Gallison	AS	IPI00297593
		Gallison	AS	IPI00297593
		Gallison	AS	IPI00297593
		Gallison	AS	IPI00297593
		Gallison	AS	IPI00297593
		Gallison	AS	IPI00297593
		Gallison	AS	IPI00297593
		Gallison	AS	IPI00297593
		Gallison	AS	IPI00297593
		Gallison	AS	IPI00297593
		Gallison	AS	IPI00297593
		Gallison	AS	IPI00297593
		Gallison	AS	IPI00297593
		Gallison	AS	IPI00297593
		Gallison	AS	IPI00297593
		Gallison	AS	IPI00297593
		Gallison	AS	IPI00297593
		Gallison	AS	IPI00297593
		Gallison	AS	IPI00297593
		Gallison	AS	IPI00297593
		Gallison	AS	IPI00297593
		Gallison	AS	IPI00297593
		Gallison	AS	IPI00167492
		Gallison	AS	IPI00167492
		Gallison	AS	IPI00167492
		Gallison	AS	IPI00006211
		Gallison	AS	IPI00006211
		Gallison	AS	IPI00006211
		Gallison	AS	IPI00289083
		Gallison	AS	IPI00289083
		Gallison	AS	IPI00289083
		Gallison	AS	IPI00289083
		Gallison	AS	IPI00289083
		Gallison	AS	IPI00289083
		Gallison	AS	IPI00056479
		Gallison	AS	IPI00056479
		Gallison	AS	IPI00008200
		Gallison	AS	IPI00008200
		Gallison	AS	IPI00008200
		Gallison	AS	IPI00008200
		Gallison	AS	IPI00008200
		Gallison	AS	IPI00008200
		Gallison	AS	IPI00008200
		Gallison	AS	IPI00008200
		Gallison	AS	IPI00008200
		Gallison	AS	IPI00373877
		Gallison	AS	IPI00373877
		Gallison	AS	IPI00373877
		Gallison	AS	IPI00307665
		Gallison	AS	IPI00307665
		Gallison	AS	IPI00307665
		Gallison	AS	IPI00307665
		Gallison	AS	IPI00307665
		Gallison	AS	IPI00398725
		Gallison	AS	IPI00398725
		Gallison	AS	IPI00398725
		Gallison	AS	IPI00398725
		Gallison	AS	IPI00398725
		Gallison	AS	IPI00398725
		Gallison	AS	IPI00398725
		Gallison	AS	IPI00398725
		Gallison	AS	IPI00398725
		Gallison	AS	IPI00398725
		Gallison	AS	IPI00398725
		Gallison	AS	IPI00398725
		Gallison	AS	IPI00398725
		Gallison	AS	IPI00395813
		Gallison	AS	IPI00395813
		Gallison	AS	IPI00395813
		Gallison	AS	IPI00395813
		Gallison	AS	IPI00395813
		Gallison	AS	IPI00395813
		Gallison	AS	IPI00395813
		Gallison	AS	IPI00395813
		Gallison	AS	IPI00395813
		Gallison	AS	IPI00852944
		Gallison	AS	IPI00852944
		Gallison	AS	IPI00852944
		Gallison	AS	IPI00852944
		Gallison	AS	IPI00103440
		Gallison	AS	IPI00103440
		Gallison	AS	IPI00103440
		Gallison	AS	IPI00012336
		Gallison	AS	IPI00012336
		Gallison	AS	IPI00012336
		Gallison	AS	IPI00329593
		Gallison	AS	IPI00329593
		Gallison	AS	IPI00395617
		Gallison	AS	IPI00395617
		Gallison	AS	IPI00395617
		Gallison	AS	IPI00395617
		Gallison	AS	IPI00395617
		Gallison	AS	IPI00395617
		Gallison	AS	IPI00395617
		Gallison	AS	IPI00395617
		Gallison	AS	IPI00395617
		Gallison	AS	IPI00395617
		Gallison	AS	IPI00395617
		Gallison	AS	IPI00395617
		Gallison	AS	IPI00395617
		Gallison	AS	IPI00395617
		Gallison	AS	IPI00395617
		Gallison	AS	IPI00395617
		Gallison	AS	IPI00395617
		Gallison	AS	IPI00395617
		Gallison	AS	IPI00395617
		Gallison	AS	IPI00395617
		Gallison	AS	IPI00395617
		Gallison	AS	IPI00395617
		Gallison	AS	IPI00395617
		Gallison	AS	IPI00395617
		Gallison	AS	IPI00395617
		Gallison	AS	IPI00395617
		Gallison	AS	IPI00395617
		Gallison	AS	IPI00395617
		Gallison	AS	IPI00395617
		Gallison	AS	IPI00395617
		Gallison	AS	IPI00395617
		Gallison	AS	IPI00395617
		Gallison	AS	IPI00395617
		Gallison	AS	IPI00395617
		Gallison	AS	IPI00395617
		Gallison	AS	IPI00395617
		Gallison	AS	IPI00395617
		Gallison	AS	IPI00395617
		Gallison	AS	IPI00395617
		Gallison	AS	IPI00395617
		Gallison	AS	IPI00395617
		Gallison	AS	IPI00395617
		Gallison	AS	IPI00395617
		Gallison	AS	IPI00395617
		Gallison	AS	IPI00395617
		Gallison	AS	IPI00395617
		Gallison	AS	IPI00395617
		Gallison	AS	IPI00395617
		Gallison	AS	IPI00395617
		Gallison	AS	IPI00395617
		Gallison	AS	IPI00395617
		Gallison	AS	IPI00395617
		Gallison	AS	IPI00395617
		Gallison	AS	IPI00395617
		Gallison	AS	IPI00395617
		Gallison	AS	IPI00395617
		Gallison	AS	IPI00395617
		Gallison	AS	IPI00395617
		Gallison	AS	IPI00395617
		Gallison	AS	IPI00395617
		Gallison	AS	IPI00395617
		Gallison	AS	IPI00395617
		Gallison	AS	IPI00395617
		Gallison	AS	IPI00395617
		Gallison	AS	IPI00395617
		Gallison	AS	IPI00395617
		Gallison	AS	IPI00395617
		Gallison	AS	IPI00395617
		Gallison	AS	IPI00455219
		Gallison	AS	IPI00455219
		Gallison	AS	IPI00455219
		Gallison	AS	IPI00455219
		Gallison	AS	IPI00455359
		Gallison	AS	IPI00455359
		Gallison	AS	IPI00455359
		Gallison	AS	IPI00455359
		Gallison	AS	IPI00455359
		Gallison	AS	IPI00455359
		Gallison	AS	IPI00455359
		Gallison	AS	IPI00455359
		Gallison	AS	IPI00455359
		Gallison	AS	IPI00455359
		Gallison	AS	IPI00413671
		Gallison	AS	IPI00413671
		Gallison	AS	IPI00413671
		Gallison	AS	IPI00413671
		Gallison	AS	IPI00413671
		Gallison	AS	IPI00413671
		Gallison	AS	IPI00413671
		Gallison	AS	IPI00413671
		Gallison	AS	IPI00413671
		Gallison	AS	IPI00413671
		Gallison	AS	IPI00413671
		Gallison	AS	IPI00868781
		Gallison	AS	IPI00868781
		Gallison	AS	IPI00719073
		Gallison	AS	IPI00719073
		Gallison	AS	IPI00719073
		Gallison	AS	IPI00719073
		Gallison	AS	IPI00719073
		Gallison	AS	IPI00719073
		Gallison	AS	IPI00719073
		Gallison	AS	IPI00719073
		Gallison	AS	IPI00719073
		Gallison	AS	IPI00719073
		Gallison	AS	IPI00719073
		Gallison	AS	IPI00719073
		Gallison	AS	IPI00719073
		Gallison	AS	IPI00719073
		Gallison	AS	IPI00719073
		Gallison	AS	IPI00719073
		Gallison	AS	IPI00719073
		Gallison	AS	IPI00719073
		Gallison	AS	IPI00719073
		Gallison	AS	IPI00719073
		Gallison	AS	IPI00719073
		Gallison	AS	IPI00719073
		Gallison	AS	IPI00719073
		Gallison	AS	IPI00719073
		Gallison	AS	IPI00719073
		Gallison	AS	IPI00719073
		Gallison	AS	IPI00719073
		Gallison	AS	IPI00719073
		Gallison	AS	IPI00719073
		Gallison	AS	IPI00719073
		Gallison	AS	IPI00719073
		Gallison	AS	IPI00719073
		Gallison	AS	IPI00719073
		Gallison	AS	IPI00719073
		Gallison	AS	IPI00719073
		Gallison	AS	IPI00719073
		Gallison	AS	IPI00719073
		Gallison	AS	IPI00719073
		Gallison	AS	IPI00719073
		Gallison	AS	IPI00719073
		Gallison	AS	IPI00719073
		Gallison	AS	IPI00719073
		Gallison	AS	IPI00719073
		Gallison	AS	IPI00719073
		Gallison	AS	IPI00719073
		Gallison	AS	IPI00719073
		Gallison	AS	IPI00719073
		Gallison	AS	IPI00719073
		Gallison	AS	IPI00719073
		Gallison	AS	IPI00719073
		Gallison	AS	IPI00719073
		Gallison	AS	IPI00719073
		Gallison	AS	IPI00719073
		Gallison	AS	IPI00719073
		Gallison	AS	IPI00719073
		Gallison	AS	IPI00719073
		Gallison	AS	IPI00719073
		Gallison	AS	IPI00719073
		Gallison	AS	IPI00719073
		Gallison	AS	IPI00719073
		Gallison	AS	IPI00719073
		Gallison	AS	IPI00719073
		Gallison	AS	IPI00719073
		Gallison	AS	IPI00719073
		Gallison	AS	IPI00719073
		Gallison	AS	IPI00719073
		Gallison	AS	IPI00719073
		Gallison	AS	IPI00719073
		Gallison	AS	IPI00719073
		Gallison	AS	IPI00719073
		Gallison	AS	IPI00719073
		Gallison	AS	IPI00719073
		Gallison	AS	IPI00719073
		Gallison	AS	IPI00719073
		Gallison	AS	IPI00719073
		Gallison	AS	IPI00719073
		Gallison	AS	IPI00719073
		Gallison	AS	IPI00719073
		Gallison	AS	IPI00719073
		Gallison	AS	IPI00719073
		Gallison	AS	IPI00719073
		Gallison	AS	IPI00719073
		Gallison	AS	IPI00719073
		Gallison	AS	IPI00719073
		Gallison	AS	IPI00719073
		Gallison	AS	IPI00719073
		Gallison	AS	IPI00719073
		Gallison	AS	IPI00719073
		Gallison	AS	IPI00719073
		Gallison	AS	IPI00719073
		Gallison	AS	IPI00719073
		Gallison	AS	IPI00719073
		Gallison	AS	IPI00719073
		Gallison	AS	IPI00719073
		Gallison	AS	IPI00719073
		Gallison	AS	IPI00719073
		Gallison	AS	IPI00719073
		Gallison	AS	IPI00719073
		Gallison	AS	IPI00646493
		Gallison	AS	IPI00646493
		Gallison	AS	IPI00646493
		Gallison	AS	IPI00646493
		Gallison	AS	IPI00550212
		Gallison	AS	IPI00550212
		Gallison	AS	IPI00550212
		Gallison	AS	IPI00604713
		Gallison	AS	IPI00604713
		Gallison	AS	IPI00604713
		Gallison	AS	IPI00604713
		Gallison	AS	IPI00604713
		Gallison	AS	IPI00604713
		Gallison	AS	IPI00604713
		Gallison	AS	IPI00604713
		Gallison	AS	IPI00604713
		Gallison	AS	IPI00604713
		Gallison	AS	IPI00456707
		Gallison	AS	IPI00456707
		Gallison	AS	IPI00456707
		Gallison	AS	IPI00456707
		Gallison	AS	IPI00456707
		Gallison	AS	IPI00456707
		Gallison	AS	IPI00456707
		Gallison	AS	IPI00456707
		Gallison	AS	IPI00456707
		Gallison	AS	IPI00456707
		Gallison	AS	IPI00746655
		Gallison	AS	IPI00746655
		Gallison	AS	IPI00746655
		Gallison	AS	IPI00746655
		Gallison	AS	IPI00746655
		Gallison	AS	IPI00746655
		Gallison	AS	IPI00302592
		Gallison	AS	IPI00302592
		Gallison	AS	IPI00554703
		Gallison	AS	IPI00554703
		Gallison	AS	IPI00216492
		Gallison	AS	IPI00216492
		Gallison	AS	IPI00383296
		Gallison	AS	IPI00383296
		Gallison	AS	IPI00383296
		Gallison	AS	IPI00383296
		Gallison	AS	IPI00383296
		Gallison	AS	IPI00383296
		Gallison	AS	IPI00383296
		Gallison	AS	IPI00383296
		Gallison	AS	IPI00383296
		Gallison	AS	IPI00383296
		Gallison	AS	IPI00383296
		Gallison	AS	IPI00383296
		Gallison	AS	IPI00418336
		Gallison	AS	IPI00418336
		Gallison	AS	IPI00337736
		Gallison	AS	IPI00337736
		Gallison	AS	IPI00337736
		Gallison	AS	IPI00337736
		Gallison	AS	IPI00337736
		Gallison	AS	IPI00376144
		Gallison	AS	IPI00376144
		Gallison	AS	IPI00376144
		Gallison	AS	IPI00376144
		Gallison	AS	IPI00376144
		Gallison	AS	IPI00376144
		Gallison	AS	IPI00376144
		Gallison	AS	IPI00376144
		Gallison	AS	IPI00376144
		Gallison	AS	IPI00376144
		Gallison	AS	IPI00376144
		Gallison	AS	IPI00376144
		Gallison	AS	IPI00376144
		Gallison	AS	IPI00376144
		Gallison	AS	IPI00643943
		Gallison	AS	IPI00643943
		Gallison	AS	IPI00446235
		Gallison	AS	IPI00446235
		Gallison	AS	IPI00446235
		Gallison	AS	IPI00446235
		Gallison	AS	IPI00446235
		Gallison	AS	IPI00239406
		Gallison	AS	IPI00239406
		Gallison	AS	IPI00239406
		Gallison	AS	IPI00006196
		Gallison	AS	IPI00006196
		Gallison	AS	IPI00006196
		Gallison	AS	IPI00006196
		Gallison	AS	IPI00006196
		Gallison	AS	IPI00006196
		Gallison	AS	IPI00006196
		Gallison	AS	IPI00157845
		Gallison	AS	IPI00157845
		Gallison	AS	IPI00157845
		Gallison	AS	IPI00157845
		Gallison	AS	IPI00157845
		Gallison	AS	IPI00157845
		Gallison	AS	IPI00385001
		Gallison	AS	IPI00385001
		Gallison	AS	IPI00385001
		Gallison	AS	IPI00254408
		Gallison	AS	IPI00254408
		Gallison	AS	IPI00254408
		Gallison	AS	IPI00554461
		Gallison	AS	IPI00554461
		Gallison	AS	IPI00554461
		Gallison	AS	IPI00554461
		Gallison	AS	IPI00554461
		Gallison	AS	IPI00554461
		Gallison	AS	IPI00554461
		Gallison	AS	IPI00334175
		Gallison	AS	IPI00334175
		Gallison	AS	IPI00334175
		Gallison	AS	IPI00334175
		Gallison	AS	IPI00334175
		Gallison	AS	IPI00334175
		Gallison	AS	IPI00334175
		Gallison	AS	IPI00645060
		Gallison	AS	IPI00645060
		Gallison	AS	IPI00645060
		Gallison	AS	IPI00645060
		Gallison	AS	IPI00645060
		Gallison	AS	IPI00645060
		Gallison	AS	IPI00645060
		Gallison	AS	IPI00645060
		Gallison	AS	IPI00645060
		Gallison	AS	IPI00645060
		Gallison	AS	IPI00645060
		Gallison	AS	IPI00645060
		Gallison	AS	IPI00645060
		Gallison	AS	IPI00645060
		Gallison	AS	IPI00645060
		Gallison	AS	IPI00645060
		Gallison	AS	IPI00645060
		Gallison	AS	IPI00645060
		Gallison	AS	IPI00645060
		Gallison	AS	IPI00645060
		Gallison	AS	IPI00645060
		Gallison	AS	IPI00337386
		Gallison	AS	IPI00337386
		Gallison	AS	IPI00337386
		Gallison	AS	IPI00337386
		Gallison	AS	IPI00465288
		Gallison	AS	IPI00465288
		Gallison	AS	IPI00294794
		Gallison	AS	IPI00294794
		Gallison	AS	IPI00294794
		Gallison	AS	IPI00294794
		Gallison	AS	IPI00294794
		Gallison	AS	IPI00294794
		Gallison	AS	IPI00294794
		Gallison	AS	IPI00294794
		Gallison	AS	IPI00294794
		Gallison	AS	IPI00294794
		Gallison	AS	IPI00294794
		Gallison	AS	IPI00294794
		Gallison	AS	IPI00303063
		Gallison	AS	IPI00303063
		Gallison	AS	IPI00303063
		Gallison	AS	IPI00375454
		Gallison	AS	IPI00375454
		Gallison	AS	IPI00375454
		Gallison	AS	IPI00375454
		Gallison	AS	IPI00375454
[truncated: 6,285 more rows]

## Sheet: uniprot-annotation%3A%28type%3A
Entry	Entry name	Status	Protein names	Gene names	Organism	Length
Q9SJN0	ABI5_ARATH	reviewed	Protein ABSCISIC ACID-INSENSITIVE 5 (Dc3 promoter-binding factor 1) (AtDPBF1) (Protein GROWTH-INSENSITIVITY TO ABA 1) (bZIP transcription factor 39) (AtbZIP39)	ABI5 BZIP39 DPBF1 GIA1 NEM1 At2g36270 F2H17.12	Arabidopsis thaliana (Mouse-ear cress)	442
Q9TT90	ANDR_CANFA	reviewed	Androgen receptor (Dihydrotestosterone receptor) (Nuclear receptor subfamily 3 group C member 4)	AR NR3C4	Canis familiaris (Dog) (Canis lupus familiaris)	907
Q8MIK0	ANDR_CROCR	reviewed	Androgen receptor (Dihydrotestosterone receptor) (Nuclear receptor subfamily 3 group C member 4)	AR NR3C4	Crocuta crocuta (Spotted hyena)	912
O97776	ANDR_EULFC	reviewed	Androgen receptor (Dihydrotestosterone receptor) (Nuclear receptor subfamily 3 group C member 4)	AR NR3C4	Eulemur fulvus collaris (Collared brown lemur) (Eulemur collaris)	884
P10275	ANDR_HUMAN	reviewed	Androgen receptor (Dihydrotestosterone receptor) (Nuclear receptor subfamily 3 group C member 4)	AR DHTR NR3C4	Homo sapiens (Human)	919
O97952	ANDR_MACFA	reviewed	Androgen receptor (Dihydrotestosterone receptor) (Nuclear receptor subfamily 3 group C member 4)	AR NR3C4	Macaca fascicularis (Crab-eating macaque) (Cynomolgus monkey)	895
Q6QT55	ANDR_MACMU	reviewed	Androgen receptor (Dihydrotestosterone receptor) (Nuclear receptor subfamily 3 group C member 4)	AR NR3C4	Macaca mulatta (Rhesus macaque)	895
P19091	ANDR_MOUSE	reviewed	Androgen receptor (Dihydrotestosterone receptor) (Nuclear receptor subfamily 3 group C member 4)	Ar Nr3c4	Mus musculus (Mouse)	899
O97775	ANDR_PANTR	reviewed	Androgen receptor (Dihydrotestosterone receptor) (Nuclear receptor subfamily 3 group C member 4)	AR NR3C4	Pan troglodytes (Chimpanzee)	911
O97960	ANDR_PAPHA	reviewed	Androgen receptor (Dihydrotestosterone receptor) (Nuclear receptor subfamily 3 group C member 4)	AR NR3C4	Papio hamadryas (Hamadryas baboon)	895
Q9GKL7	ANDR_PIG	reviewed	Androgen receptor (Dihydrotestosterone receptor) (Nuclear receptor subfamily 3 group C member 4)	AR NR3C4	Sus scrofa (Pig)	896
P49699	ANDR_RABIT	reviewed	Androgen receptor (Dihydrotestosterone receptor) (Nuclear receptor subfamily 3 group C member 4) (Fragment)	AR NR3C4	Oryctolagus cuniculus (Rabbit)	709
P15207	ANDR_RAT	reviewed	Androgen receptor (Dihydrotestosterone receptor) (Nuclear receptor subfamily 3 group C member 4)	Ar Nr3c4	Rattus norvegicus (Rat)	902
A1A4R9	AP2A_BOVIN	reviewed	Transcription factor AP-2-alpha (AP2-alpha) (AP-2 transcription factor) (Activating enhancer-binding protein 2-alpha) (Activator protein 2) (AP-2)	TFAP2A	Bos taurus (Bovine)	437
P05549	AP2A_HUMAN	reviewed	Transcription factor AP-2-alpha (AP2-alpha) (AP-2 transcription factor) (Activating enhancer-binding protein 2-alpha) (Activator protein 2) (AP-2)	TFAP2A AP2TF TFAP2	Homo sapiens (Human)	437
P34056	AP2A_MOUSE	reviewed	Transcription factor AP-2-alpha (AP2-alpha) (AP-2 transcription factor) (Activating enhancer-binding protein 2-alpha) (Activator protein 2) (AP-2)	Tfap2a Ap2tf Tcfap2a	Mus musculus (Mouse)	437
P58197	AP2A_RAT	reviewed	Transcription factor AP-2-alpha (AP2-alpha) (AP-2 transcription factor) (Activating enhancer-binding protein 2-alpha) (Activator protein 2) (AP-2)	Tfap2a Tcfap2a	Rattus norvegicus (Rat)	437
Q76HI7	AP2B_CANFA	reviewed	Transcription factor AP-2-beta (AP2-beta) (Activating enhancer-binding protein 2-beta)	TFAP2B	Canis familiaris (Dog) (Canis lupus familiaris)	460
Q92481	AP2B_HUMAN	reviewed	Transcription factor AP-2-beta (AP2-beta) (Activating enhancer-binding protein 2-beta)	TFAP2B	Homo sapiens (Human)	460
Q61313	AP2B_MOUSE	reviewed	Transcription factor AP-2-beta (AP2-beta) (Activating enhancer-binding protein 2-beta)	Tfap2b Tcfap2b	Mus musculus (Mouse)	459
Q92754	AP2C_HUMAN	reviewed	Transcription factor AP-2 gamma (AP2-gamma) (Activating enhancer-binding protein 2 gamma) (Transcription factor ERF-1)	TFAP2C	Homo sapiens (Human)	450
Q61312	AP2C_MOUSE	reviewed	Transcription factor AP-2 gamma (AP2-gamma) (AP-2.2) (Activating enhancer-binding protein 2 gamma)	Tfap2c Tcfap2c	Mus musculus (Mouse)	449
P17544	ATF7_HUMAN	reviewed	Cyclic AMP-dependent transcription factor ATF-7 (cAMP-dependent transcription factor ATF-7) (Activating transcription factor 7) (Transcription factor ATF-A)	ATF7 ATFA	Homo sapiens (Human)	494
Q8R0S1	ATF7_MOUSE	reviewed	Cyclic AMP-dependent transcription factor ATF-7 (cAMP-dependent transcription factor ATF-7) (Activating transcription factor 7) (Transcription factor ATF-A)	Atf7	Mus musculus (Mouse)	413
Q5R9C9	ATF7_PONAB	reviewed	Cyclic AMP-dependent transcription factor ATF-7 (cAMP-dependent transcription factor ATF-7) (Activating transcription factor 7) (Transcription factor ATF-A)	ATF7	Pongo abelii (Sumatran orangutan)	483
P54253	ATX1_HUMAN	reviewed	Ataxin-1 (Spinocerebellar ataxia type 1 protein)	ATXN1 ATX1 SCA1	Homo sapiens (Human)	815
P54254	ATX1_MOUSE	reviewed	Ataxin-1 (Spinocerebellar ataxia type 1 protein homolog)	Atxn1 Sca1	Mus musculus (Mouse)	791
Q63540	ATX1_RAT	reviewed	Ataxin-1 (Spinocerebellar ataxia type 1 protein homolog)	Atxn1 Sca1	Rattus norvegicus (Rat)	789
O15265	ATX7_HUMAN	reviewed	Ataxin-7 (Spinocerebellar ataxia type 7 protein)	ATXN7 SCA7	Homo sapiens (Human)	892
Q8R4I1	ATX7_MOUSE	reviewed	Ataxin-7 (Spinocerebellar ataxia type 7 protein homolog)	Atxn7 Sca7	Mus musculus (Mouse)	867
O15169	AXIN1_HUMAN	reviewed	Axin-1 (Axis inhibition protein 1) (hAxin)	AXIN1 AXIN	Homo sapiens (Human)	862
O35625	AXIN1_MOUSE	reviewed	Axin-1 (Axis inhibition protein 1) (Protein Fused)	Axin1 Axin Fu	Mus musculus (Mouse)	863
O70239	AXIN1_RAT	reviewed	Axin-1 (Axis inhibition protein 1) (rAxin)	Axin1 Axin	Rattus norvegicus (Rat)	827
Q9H165	BC11A_HUMAN	reviewed	B-cell lymphoma/leukemia 11A (BCL-11A) (B-cell CLL/lymphoma 11A) (COUP-TF-interacting protein 1) (Ecotropic viral integration site 9 protein homolog) (EVI-9) (Zinc finger protein 856)	BCL11A CTIP1 EVI9 KIAA1809 ZNF856	Homo sapiens (Human)	835
Q9QYE3	BC11A_MOUSE	reviewed	B-cell lymphoma/leukemia 11A (BCL-11A) (B-cell CLL/lymphoma 11A) (COUP-TF-interacting protein 1) (Ecotropic viral integration site 9 protein) (EVI-9)	Bcl11a Ctip1 Evi9 Kiaa1809	Mus musculus (Mouse)	773
Q9I8T7	BMAL1_CHICK	reviewed	Aryl hydrocarbon receptor nuclear translocator-like protein 1 (BMAL1b') (Brain and muscle ARNT-like 1) (cBMAL1)	ARNTL BMAL1	Gallus gallus (Chicken)	633
A0MLS5	BMAL1_HORSE	reviewed	Aryl hydrocarbon receptor nuclear translocator-like protein 1 (Brain and muscle ARNT-like 1)	ARNTL BMAL1	Equus caballus (Horse)	626
O00327	BMAL1_HUMAN	reviewed	Aryl hydrocarbon receptor nuclear translocator-like protein 1 (Basic-helix-loop-helix-PAS protein MOP3) (Brain and muscle ARNT-like 1) (Class E basic helix-loop-helix protein 5) (bHLHe5) (Member of PAS protein 3) (PAS domain-containing protein 3) (bHLH-PAS protein JAP3)	ARNTL BHLHE5 BMAL1 MOP3 PASD3	Homo sapiens (Human)	626
O88529	BMAL1_MESAU	reviewed	Aryl hydrocarbon receptor nuclear translocator-like protein 1 (Brain and muscle ARNT-like 1)	ARNTL BMAL1	Mesocricetus auratus (Golden hamster)	626
Q9WTL8	BMAL1_MOUSE	reviewed	Aryl hydrocarbon receptor nuclear translocator-like protein 1 (Arnt3) (Brain and muscle ARNT-like 1)	Arntl Bmal1	Mus musculus (Mouse)	632
Q91YA9	BMAL1_NANGA	reviewed	Aryl hydrocarbon receptor nuclear translocator-like protein 1 (Brain and muscle ARNT-like 1)	Arntl BMAL1	Nannospalax galili (Northern Israeli blind subterranean mole rat) (Spalax galili)	626
Q5R4T2	BMAL1_PONAB	reviewed	Aryl hydrocarbon receptor nuclear translocator-like protein 1 (Brain and muscle ARNT-like 1)	ARNTL BMAL1	Pongo abelii (Sumatran orangutan)	625
Q9EPW1	BMAL1_RAT	reviewed	Aryl hydrocarbon receptor nuclear translocator-like protein 1 (Brain and muscle ARNT-like 1) (Tic)	Arntl Bmal1 Tic	Rattus norvegicus (Rat)	626
Q6YGZ5	BMAL1_TYTAL	reviewed	Aryl hydrocarbon receptor nuclear translocator-like protein 1 (Brain and muscle ARNT-like 1)	ARNTL BMAL1	Tyto alba (Barn owl)	633
Q92793	CBP_HUMAN	reviewed	CREB-binding protein (EC 2.3.1.48)	CREBBP CBP	Homo sapiens (Human)	2442
P45481	CBP_MOUSE	reviewed	CREB-binding protein (EC 2.3.1.48)	Crebbp Cbp	Mus musculus (Mouse)	2441
Q6JHU9	CBP_RAT	reviewed	CREB-binding protein (EC 2.3.1.48)	Crebbp Cbp	Rattus norvegicus (Rat)	2442
P35520	CBS_HUMAN	reviewed	Cystathionine beta-synthase (EC 4.2.1.22) (Beta-thionase) (Serine sulfhydrase)	CBS	Homo sapiens (Human)	551
Q58H57	CBS_MACFA	reviewed	Cystathionine beta-synthase (EC 4.2.1.22) (Beta-thionase) (Serine sulfhydrase)	CBS	Macaca fascicularis (Crab-eating macaque) (Cynomolgus monkey)	551
Q91WT9	CBS_MOUSE	reviewed	Cystathionine beta-synthase (EC 4.2.1.22) (Beta-thionase) (Serine sulfhydrase)	Cbs	Mus musculus (Mouse)	561
Q9N0V7	CBS_RABIT	reviewed	Cystathionine beta-synthase (EC 4.2.1.22) (Beta-thionase) (Serine sulfhydrase)	CBS	Oryctolagus cuniculus (Rabbit)	551
P32232	CBS_RAT	reviewed	Cystathionine beta-synthase (EC 4.2.1.22) (Beta-thionase) (Hemoprotein H-450) (Serine sulfhydrase)	Cbs	Rattus norvegicus (Rat)	561
O00257	CBX4_HUMAN	reviewed	E3 SUMO-protein ligase CBX4 (Chromobox protein homolog 4) (Polycomb 2 homolog) (Pc2) (hPc2)	CBX4	Homo sapiens (Human)	560
O55187	CBX4_MOUSE	reviewed	E3 SUMO-protein ligase CBX4 (Chromobox protein homolog 4) (Polycomb 2 homolog) (Pc2) (mPc2)	Cbx4 Pc2	Mus musculus (Mouse)	551
P32458	CDC11_YEAST	reviewed	Cell division control protein 11	CDC11 PSL9 YJR076C J1833	Saccharomyces cerevisiae (strain ATCC 204508 / S288c) (Baker's yeast)	415
P32457	CDC3_YEAST	reviewed	Cell division control protein 3	CDC3 YLR314C L8543.7	Saccharomyces cerevisiae (strain ATCC 204508 / S288c) (Baker's yeast)	520
O02755	CEBPB_BOVIN	reviewed	CCAAT/enhancer-binding protein beta (C/EBP beta)	CEBPB	Bos taurus (Bovine)	348
P17676	CEBPB_HUMAN	reviewed	CCAAT/enhancer-binding protein beta (C/EBP beta) (Liver activator protein) (Nuclear factor NF-IL6) (Transcription factor 5) (TCF-5)	CEBPB LAP TCF5 PP9092	Homo sapiens (Human)	345
P28033	CEBPB_MOUSE	reviewed	CCAAT/enhancer-binding protein beta (C/EBP beta) (AGP/EBP) (Interleukin-6-dependent-binding protein) (IL-6DBP) (Liver-enriched transcriptional activator) (LAP)	Cebpb	Mus musculus (Mouse)	296
P21272	CEBPB_RAT	reviewed	CCAAT/enhancer-binding protein beta (C/EBP beta) (C/EBP-related protein 2) (Interleukin-6-dependent-binding protein) (IL-6DBP) (Liver-enriched transcriptional activator) (LAP) (Silencer factor B) (SF-B)	Cebpb Crp2 Sfb	Rattus norvegicus (Rat)	297
O02756	CEBPD_BOVIN	reviewed	CCAAT/enhancer-binding protein delta (C/EBP delta)	CEBPD	Bos taurus (Bovine)	256
P49716	CEBPD_HUMAN	reviewed	CCAAT/enhancer-binding protein delta (C/EBP delta) (Nuclear factor NF-IL6-beta) (NF-IL6-beta)	CEBPD	Homo sapiens (Human)	269
Q00322	CEBPD_MOUSE	reviewed	CCAAT/enhancer-binding protein delta (C/EBP delta) (C/EBP-related protein 3)	Cebpd Crp3	Mus musculus (Mouse)	268
Q03484	CEBPD_RAT	reviewed	CCAAT/enhancer-binding protein delta (C/EBP delta) (Transcription factor CELF)	Cebpd Celf	Rattus norvegicus (Rat)	268
Q9N0J3	CEBPD_SHEEP	reviewed	CCAAT/enhancer-binding protein delta (C/EBP delta)	CEBPD	Ovis aries (Sheep)	255
Q9HCK8	CHD8_HUMAN	reviewed	Chromodomain-helicase-DNA-binding protein 8 (CHD-8) (EC 3.6.4.12) (ATP-dependent helicase CHD8) (Helicase with SNF2 domain 1)	CHD8 HELSNF1 KIAA1564	Homo sapiens (Human)	2581
Q09XV5	CHD8_MOUSE	reviewed	Chromodomain-helicase-DNA-binding protein 8 (CHD-8) (EC 3.6.4.12) (ATP-dependent helicase CHD8) (Axis duplication inhibitor) (Duplin)	Chd8 Kiaa1564	Mus musculus (Mouse)	2582
Q9JIX5	CHD8_RAT	reviewed	Chromodomain-helicase-DNA-binding protein 8 (CHD-8) (EC 3.6.4.12) (ATP-dependent helicase CHD8) (Axis duplication inhibitor) (Duplin)	Chd8	Rattus norvegicus (Rat)	2581
A5PK21	CKP2L_BOVIN	reviewed	Cytoskeleton-associated protein 2-like	CKAP2L	Bos taurus (Bovine)	744
Q8IYA6	CKP2L_HUMAN	reviewed	Cytoskeleton-associated protein 2-like	CKAP2L	Homo sapiens (Human)	745
Q7TS74	CKP2L_MOUSE	reviewed	Cytoskeleton-associated protein 2-like	Ckap2l	Mus musculus (Mouse)	745
P79101	CPSF3_BOVIN	reviewed	Cleavage and polyadenylation specificity factor subunit 3 (EC 3.1.27.-) (Cleavage and polyadenylation specificity factor 73 kDa subunit) (CPSF 73 kDa subunit) (mRNA 3'-end-processing endonuclease CPSF-73)	CPSF3 CPSF73	Bos taurus (Bovine)	684
Q9UKF6	CPSF3_HUMAN	reviewed	Cleavage and polyadenylation specificity factor subunit 3 (EC 3.1.27.-) (Cleavage and polyadenylation specificity factor 73 kDa subunit) (CPSF 73 kDa subunit) (mRNA 3'-end-processing endonuclease CPSF-73)	CPSF3 CPSF73	Homo sapiens (Human)	684
Q9QXK7	CPSF3_MOUSE	reviewed	Cleavage and polyadenylation specificity factor subunit 3 (EC 3.1.27.-) (Cleavage and polyadenylation specificity factor 73 kDa subunit) (CPSF 73 kDa subunit) (mRNA 3'-end-processing endonuclease CPSF-73)	Cpsf3 Cpsf73	Mus musculus (Mouse)	684
P27925	CREB1_BOVIN	reviewed	Cyclic AMP-responsive element-binding protein 1 (CREB-1) (cAMP-responsive element-binding protein 1) (Cyclic AMP-responsive DNA-binding protein)	CREB1 CREB CREB2	Bos taurus (Bovine)	325
P16220	CREB1_HUMAN	reviewed	Cyclic AMP-responsive element-binding protein 1 (CREB-1) (cAMP-responsive element-binding protein 1)	CREB1	Homo sapiens (Human)	341
Q01147	CREB1_MOUSE	reviewed	Cyclic AMP-responsive element-binding protein 1 (CREB-1) (cAMP-responsive element-binding protein 1)	Creb1 Creb-1	Mus musculus (Mouse)	341
P15337	CREB1_RAT	reviewed	Cyclic AMP-responsive element-binding protein 1 (CREB-1) (cAMP-responsive element-binding protein 1)	Creb1 Creb-1	Rattus norvegicus (Rat)	341
Q13363	CTBP1_HUMAN	reviewed	C-terminal-binding protein 1 (CtBP1) (EC 1.1.1.-)	CTBP1 CTBP	Homo sapiens (Human)	440
O88712	CTBP1_MOUSE	reviewed	C-terminal-binding protein 1 (CtBP1) (EC 1.1.1.-)	Ctbp1	Mus musculus (Mouse)	441
Q9Z2F5	CTBP1_RAT	reviewed	C-terminal-binding protein 1 (CtBP1) (EC 1.1.1.-) (50 kDa BFA-dependent ADP-ribosylation substrate) (BARS-50) (C-terminal-binding protein 3) (CtBP3)	Ctbp1 Bars Ctbp3	Rattus norvegicus (Rat)	430
P49711	CTCF_HUMAN	reviewed	Transcriptional repressor CTCF (11-zinc finger protein) (CCCTC-binding factor) (CTCFL paralog)	CTCF	Homo sapiens (Human)	727
Q61164	CTCF_MOUSE	reviewed	Transcriptional repressor CTCF (11-zinc finger protein) (CCCTC-binding factor) (CTCFL paralog)	Ctcf	Mus musculus (Mouse)	736
Q9R1D1	CTCF_RAT	reviewed	Transcriptional repressor CTCF (11-zinc finger protein) (CCCTC-binding factor) (CTCFL paralog)	Ctcf	Rattus norvegicus (Rat)	737
Q2KIA5	DNM1L_BOVIN	reviewed	Dynamin-1-like protein (EC 3.6.5.5)	DNM1L	Bos taurus (Bovine)	749
O00429	DNM1L_HUMAN	reviewed	Dynamin-1-like protein (EC 3.6.5.5) (Dnm1p/Vps1p-like protein) (DVLP) (Dynamin family member proline-rich carboxyl-terminal domain less) (Dymple) (Dynamin-like protein) (Dynamin-like protein 4) (Dynamin-like protein IV) (HdynIV) (Dynamin-related protein 1)	DNM1L DLP1 DRP1	Homo sapiens (Human)	736
Q8K1M6	DNM1L_MOUSE	reviewed	Dynamin-1-like protein (EC 3.6.5.5) (Dynamin family member proline-rich carboxyl-terminal domain less) (Dymple) (Dynamin-related protein 1)	Dnm1l Drp1	Mus musculus (Mouse)	742
O35303	DNM1L_RAT	reviewed	Dynamin-1-like protein (EC 3.6.5.5) (Dynamin-like protein)	Dnm1l Dlp1	Rattus norvegicus (Rat)	755
P55265	DSRAD_HUMAN	reviewed	Double-stranded RNA-specific adenosine deaminase (DRADA) (EC 3.5.4.-) (136 kDa double-stranded RNA-binding protein) (p136) (Interferon-inducible protein 4) (IFI-4) (K88DSRBP)	ADAR ADAR1 DSRAD G1P1 IFI4	Homo sapiens (Human)	1226
Q99MU3	DSRAD_MOUSE	reviewed	Double-stranded RNA-specific adenosine deaminase (DRADA) (EC 3.5.4.-) (RNA adenosine deaminase 1)	Adar	Mus musculus (Mouse)	1178
P55266	DSRAD_RAT	reviewed	Double-stranded RNA-specific adenosine deaminase (DRADA) (EC 3.5.4.-)	Adar Dsrad	Rattus norvegicus (Rat)	1175
P26634	EGR2_CERTH	reviewed	E3 SUMO-protein ligase EGR2 (EC 6.3.2.-) (Early growth response protein 2) (EGR-2) (Zinc finger protein Krox-20) (Fragment)	EGR2 KROX20	Cerdocyon thous (Crab-eating fox) (Dusicyon thous)	62
P26633	EGR2_CRIGR	reviewed	E3 SUMO-protein ligase EGR2 (EC 6.3.2.-) (Early growth response protein 2) (EGR-2) (Zinc finger protein Krox-20) (Fragment)	EGR2 KROX20	Cricetulus griseus (Chinese hamster) (Cricetulus barabensis griseus)	62
P11161	EGR2_HUMAN	reviewed	E3 SUMO-protein ligase EGR2 (EC 6.3.2.-) (AT591) (Early growth response protein 2) (EGR-2) (Zinc finger protein Krox-20)	EGR2 KROX20	Homo sapiens (Human)	476
P08152	EGR2_MOUSE	reviewed	E3 SUMO-protein ligase EGR2 (EC 6.3.2.-) (Early growth response protein 2) (EGR-2) (Zinc finger protein Krox-20)	Egr2 Egr-2 Krox-20 Zfp-25	Mus musculus (Mouse)	470
A1XSY8	EGR2_PIG	reviewed	E3 SUMO-protein ligase EGR2 (EC 6.3.2.-) (Early growth response protein 2) (EGR-2)	EGR2	Sus scrofa (Pig)	471
P51774	EGR2_RAT	reviewed	E3 SUMO-protein ligase EGR2 (EC 6.3.2.-) (Early growth response protein 2) (EGR-2) (Zinc finger protein Krox-20)	Egr2 Egr-2 Krox-20 Krox20	Rattus norvegicus (Rat)	470
P19419	ELK1_HUMAN	reviewed	ETS domain-containing protein Elk-1	ELK1	Homo sapiens (Human)	428
P41969	ELK1_MOUSE	reviewed	ETS domain-containing protein Elk-1	Elk1	Mus musculus (Mouse)	429
Q09472	EP300_HUMAN	reviewed	Histone acetyltransferase p300 (p300 HAT) (EC 2.3.1.48) (E1A-associated protein p300)	EP300 P300	Homo sapiens (Human)	2414
B2RWS6	EP300_MOUSE	reviewed	Histone acetyltransferase p300 (p300 HAT) (EC 2.3.1.48) (E1A-associated protein p300)	Ep300 P300	Mus musculus (Mouse)	2415
P11474	ERR1_HUMAN	reviewed	Steroid hormone receptor ERR1 (Estrogen receptor-like 1) (Estrogen-related receptor alpha) (ERR-alpha) (Nuclear receptor subfamily 3 group B member 1)	ESRRA ERR1 ESRL1 NR3B1	Homo sapiens (Human)	423
O08580	ERR1_MOUSE	reviewed	Steroid hormone receptor ERR1 (Estrogen receptor-like 1) (Estrogen-related receptor alpha) (ERR-alpha) (Nuclear receptor subfamily 3 group B member 1)	Esrra Err1 Estrra Nr3b1	Mus musculus (Mouse)	422
Q5QJV7	ERR1_RAT	reviewed	Steroid hormone receptor ERR1 (Estrogen-related receptor alpha) (ERR-alpha) (Nuclear receptor subfamily 3 group B member 1)	Esrra Nr3b1	Rattus norvegicus (Rat)	422
P62508	ERR3_HUMAN	reviewed	Estrogen-related receptor gamma (ERR gamma-2) (Estrogen receptor-related protein 3) (Nuclear receptor subfamily 3 group B member 3)	ESRRG ERR3 ERRG2 KIAA0832 NR3B3	Homo sapiens (Human)	458
P62509	ERR3_MOUSE	reviewed	Estrogen-related receptor gamma (Estrogen receptor-related protein 3) (Nuclear receptor subfamily 3 group B member 3)	Esrrg Err3 Kiaa0832 Nr3b3	Mus musculus (Mouse)	458
Q756K3	ESC2_ASHGO	reviewed	Protein ESC2 (Establishes silent chromatin protein 2)	ESC2 AER251W	Ashbya gossypii (strain ATCC 10895 / CBS 109.51 / FGSC 9923 / NRRL Y-1056) (Yeast) (Eremothecium gossypii)	407
Q06340	ESC2_YEAST	reviewed	Protein ESC2 (Establishes silent chromatin protein 2)	ESC2 YDR363W	Saccharomyces cerevisiae (strain ATCC 204508 / S288c) (Baker's yeast)	456
P14921	ETS1_HUMAN	reviewed	Protein C-ets-1 (p54)	ETS1 EWSR2	Homo sapiens (Human)	441
P27577	ETS1_MOUSE	reviewed	Protein C-ets-1 (p54)	Ets1 Ets-1	Mus musculus (Mouse)	440
P41156	ETS1_RAT	reviewed	Protein C-ets-1 (p54)	Ets1 Ets-1	Rattus norvegicus (Rat)	441
P43268	ETV4_HUMAN	reviewed	ETS translocation variant 4 (Adenovirus E1A enhancer-binding protein) (E1A-F) (Polyomavirus enhancer activator 3 homolog) (Protein PEA3)	ETV4 E1AF PEA3	Homo sapiens (Human)	484
P28322	ETV4_MOUSE	reviewed	ETS translocation variant 4 (Polyomavirus enhancer activator 3) (Protein PEA3)	Etv4 Pea-3 Pea3	Mus musculus (Mouse)	555
Q05397	FAK1_HUMAN	reviewed	Focal adhesion kinase 1 (FADK 1) (EC 2.7.10.2) (Focal adhesion kinase-related nonkinase) (FRNK) (Protein phosphatase 1 regulatory subunit 71) (PPP1R71) (Protein-tyrosine kinase 2) (p125FAK) (pp125FAK)	PTK2 FAK FAK1	Homo sapiens (Human)	1052
P34152	FAK1_MOUSE	reviewed	Focal adhesion kinase 1 (FADK 1) (EC 2.7.10.2) (Focal adhesion kinase-related nonkinase) (FRNK) (Protein-tyrosine kinase 2) (p125FAK) (pp125FAK)	Ptk2 Fadk Fak Fak1 Kiaa4203	Mus musculus (Mouse)	1090
O35346	FAK1_RAT	reviewed	Focal adhesion kinase 1 (FADK 1) (EC 2.7.10.2) (Focal adhesion kinase-related nonkinase) (FRNK) (Protein-tyrosine kinase 2) (p125FAK) (pp125FAK)	Ptk2 Fak Fak1	Rattus norvegicus (Rat)	1055
P36366	FMO2_CAVPO	reviewed	Dimethylaniline monooxygenase [N-oxide-forming] 2 (EC 1.14.13.8) (Dimethylaniline oxidase 2) (FMO 1B1) (Pulmonary flavin-containing monooxygenase 2) (FMO 2)	FMO2 FMO-2	Cavia porcellus (Guinea pig)	535
Q8HZ69	FMO2_GORGO	reviewed	Dimethylaniline monooxygenase [N-oxide-forming] 2 (EC 1.14.13.8) (Dimethylaniline oxidase 2) (FMO 1B1) (Pulmonary flavin-containing monooxygenase 2) (FMO 2)	FMO2	Gorilla gorilla gorilla (Lowland gorilla)	535
Q28505	FMO2_MACMU	reviewed	Dimethylaniline monooxygenase [N-oxide-forming] 2 (EC 1.14.13.8) (Dimethylaniline oxidase 2) (FMO 1B1) (Pulmonary flavin-containing monooxygenase 2) (FMO 2)	FMO2	Macaca mulatta (Rhesus macaque)	535
Q8K2I3	FMO2_MOUSE	reviewed	Dimethylaniline monooxygenase [N-oxide-forming] 2 (EC 1.14.13.8) (Dimethylaniline oxidase 2) (Pulmonary flavin-containing monooxygenase 2) (FMO 2)	Fmo2	Mus musculus (Mouse)	535
Q8HZ70	FMO2_PANTR	reviewed	Dimethylaniline monooxygenase [N-oxide-forming] 2 (EC 1.14.13.8) (Dimethylaniline oxidase 2) (FMO 1B1) (Pulmonary flavin-containing monooxygenase 2) (FMO 2)	FMO2	Pan troglodytes (Chimpanzee)	535
Q5REK0	FMO2_PONAB	reviewed	Dimethylaniline monooxygenase [N-oxide-forming] 2 (EC 1.14.13.8) (Dimethylaniline oxidase 2) (FMO 1B1) (Pulmonary flavin-containing monooxygenase 2) (FMO 2)	FMO2	Pongo abelii (Sumatran orangutan)	535
P17635	FMO2_RABIT	reviewed	Dimethylaniline monooxygenase [N-oxide-forming] 2 (EC 1.14.13.8) (Dimethylaniline oxidase 2) (FMO 1B1) (Pulmonary flavin-containing monooxygenase 2) (FMO 2)	FMO2	Oryctolagus cuniculus (Rabbit)	535
Q6IRI9	FMO2_RAT	reviewed	Dimethylaniline monooxygenase [N-oxide-forming] 2 (EC 1.14.13.8) (Dimethylaniline oxidase 2) (Pulmonary flavin-containing monooxygenase 2) (FMO 2)	Fmo2	Rattus norvegicus (Rat)	535
O77628	FOS_BOVIN	reviewed	Proto-oncogene c-Fos (Cellular oncogene fos)	FOS	Bos taurus (Bovine)	380
Q9Z2Q8	FOS_CRIGR	reviewed	Proto-oncogene c-Fos (Cellular oncogene fos)	FOS	Cricetulus griseus (Chinese hamster) (Cricetulus barabensis griseus)	381
Q8HZP6	FOS_FELCA	reviewed	Proto-oncogene c-Fos (Cellular oncogene fos)	FOS	Felis catus (Cat) (Felis silvestris catus)	381
P01100	FOS_HUMAN	reviewed	Proto-oncogene c-Fos (Cellular oncogene fos) (G0/G1 switch regulatory protein 7)	FOS G0S7	Homo sapiens (Human)	380
O88479	FOS_MESAU	reviewed	Proto-oncogene c-Fos (Cellular oncogene fos)	FOS	Mesocricetus auratus (Golden hamster)	381
P01101	FOS_MOUSE	reviewed	Proto-oncogene c-Fos (Cellular oncogene fos)	Fos	Mus musculus (Mouse)	380
Q56TT7	FOS_PHOCM	reviewed	Proto-oncogene c-Fos (Cellular oncogene fos)	FOS	Phodopus campbelli (Campbell's dwarf Russian hamster)	381
Q56TN0	FOS_PHORO	reviewed	Proto-oncogene c-Fos (Cellular oncogene fos)	FOS	Phodopus roborovskii (Roborovski's desert hamster) (Cricetulus roborovskii)	381
O97930	FOS_PIG	reviewed	Proto-oncogene c-Fos (Cellular oncogene fos)	FOS	Sus scrofa (Pig)	380
P12841	FOS_RAT	reviewed	Proto-oncogene c-Fos (Cellular oncogene fos)	Fos	Rattus norvegicus (Rat)	380
O02761	FOS_SHEEP	reviewed	Proto-oncogene c-Fos (Cellular oncogene fos) (Fragment)	FOS	Ovis aries (Sheep)	195
Q6VFT7	FOXL2_BOVIN	reviewed	Forkhead box protein L2	FOXL2	Bos taurus (Bovine)	377
Q8MIP2	FOXL2_CAPHI	reviewed	Forkhead box protein L2	FOXL2	Capra hircus (Goat)	377
Q4VUF1	FOXL2_ELLLU	reviewed	Forkhead box protein L2	FOXL2	Ellobius lutescens (Transcaucasian mole vole)	373
P58012	FOXL2_HUMAN	reviewed	Forkhead box protein L2	FOXL2	Homo sapiens (Human)	376
O88470	FOXL2_MOUSE	reviewed	Forkhead box protein L2 (Pituitary forkhead factor) (P-Frk)	Foxl2 Pfrk	Mus musculus (Mouse)	375
Q6VFT6	FOXL2_PIG	reviewed	Forkhead box protein L2	FOXL2	Sus scrofa (Pig)	377
Q6VFT5	FOXL2_RABIT	reviewed	Forkhead box protein L2	FOXL2	Oryctolagus cuniculus (Rabbit)	384
P15976	GATA1_HUMAN	reviewed	Erythroid transcription factor (Eryf1) (GATA-binding factor 1) (GATA-1) (GF-1) (NF-E1 DNA-binding protein)	GATA1 ERYF1 GF1	Homo sapiens (Human)	413
P17679	GATA1_MOUSE	reviewed	Erythroid transcription factor (Eryf1) (GATA-binding factor 1) (GATA-1) (GF-1) (NF-E1 DNA-binding protein)	Gata1 Gf-1	Mus musculus (Mouse)	413
P43429	GATA1_RAT	reviewed	Erythroid transcription factor (Eryf1) (GATA-binding factor 1) (GATA-1) (GF-1) (NF-E1 DNA-binding protein)	Gata1	Rattus norvegicus (Rat)	413
P79686	GCR_AOTNA	reviewed	Glucocorticoid receptor (GR) (Nuclear receptor subfamily 3 group C member 1)	NR3C1 GRL	Aotus nancymaae (Ma's night monkey)	777
Q6XLJ0	GCR_CALJA	reviewed	Glucocorticoid receptor (GR) (Nuclear receptor subfamily 3 group C member 1)	NR3C1 GRL	Callithrix jacchus (White-tufted-ear marmoset)	777
P49115	GCR_CAVPO	reviewed	Glucocorticoid receptor (GR) (Nuclear receptor subfamily 3 group C member 1)	NR3C1 GRL	Cavia porcellus (Guinea pig)	771
P04150	GCR_HUMAN	reviewed	Glucocorticoid receptor (GR) (Nuclear receptor subfamily 3 group C member 1)	NR3C1 GRL	Homo sapiens (Human)	777
P06537	GCR_MOUSE	reviewed	Glucocorticoid receptor (GR) (Nuclear receptor subfamily 3 group C member 1)	Nr3c1 Grl Grl1	Mus musculus (Mouse)	783
Q9N1U3	GCR_PIG	reviewed	Glucocorticoid receptor (GR) (Nuclear receptor subfamily 3 group C member 1)	NR3C1 GRL	Sus scrofa (Pig)	782
Q5R9P5	GCR_PONAB	reviewed	Glucocorticoid receptor (GR) (Nuclear receptor subfamily 3 group C member 1)	NR3C1 GRL	Pongo abelii (Sumatran orangutan)	777
P59667	GCR_RABIT	reviewed	Glucocorticoid receptor (GR) (Nuclear receptor subfamily 3 group C member 1)	NR3C1 GRL	Oryctolagus cuniculus (Rabbit)	772
P06536	GCR_RAT	reviewed	Glucocorticoid receptor (GR) (Nuclear receptor subfamily 3 group C member 1)	Nr3c1 Grl	Rattus norvegicus (Rat)	795
P79269	GCR_SAGOE	reviewed	Glucocorticoid receptor (GR) (Nuclear receptor subfamily 3 group C member 1)	NR3C1 GRL	Saguinus oedipus (Cotton-top tamarin)	777
O13186	GCR_SAIBB	reviewed	Glucocorticoid receptor (GR) (Nuclear receptor subfamily 3 group C member 1)	NR3C1 GRL	Saimiri boliviensis boliviensis (Bolivian squirrel monkey)	777
O46567	GCR_SAISC	reviewed	Glucocorticoid receptor (GR) (Nuclear receptor subfamily 3 group C member 1)	NR3C1 GRL	Saimiri sciureus (Common squirrel monkey)	778
P35547	GCR_SHEEP	reviewed	Glucocorticoid receptor (GR) (Nuclear receptor subfamily 3 group C member 1) (Fragment)	NR3C1 GRL	Ovis aries (Sheep)	314
Q95267	GCR_TUPBE	reviewed	Glucocorticoid receptor (GR) (Nuclear receptor subfamily 3 group C member 1)	NR3C1 GRL	Tupaia belangeri (Common tree shrew) (Tupaia glis belangeri)	776
Q94361	GEI17_CAEEL	reviewed	E3 SUMO-protein ligase gei-17 (EC 6.3.2.-) (Gex-3-interacting protein 17)	gei-17 W10D5.3	Caenorhabditis elegans	793
P41277	GPP1_YEAST	reviewed	(DL)-glycerol-3-phosphatase 1 (EC 3.1.3.-) (Related to HOR2 protein 2)	RHR2 GPP1 YIL053W	Saccharomyces cerevisiae (strain ATCC 204508 / S288c) (Baker's yeast)	250
Q13002	GRIK2_HUMAN	reviewed	Glutamate receptor, ionotropic kainate 2 (Excitatory amino acid receptor 4) (EAA4) (Glutamate receptor 6) (GluR-6) (GluR6)	GRIK2 GLUR6	Homo sapiens (Human)	908
Q38PU3	GRIK2_MACFA	reviewed	Glutamate receptor, ionotropic kainate 2 (Glutamate receptor 6) (GluR-6) (GluR6)	GRIK2	Macaca fascicularis (Crab-eating macaque) (Cynomolgus monkey)	908
P39087	GRIK2_MOUSE	reviewed	Glutamate receptor, ionotropic kainate 2 (Glutamate receptor 6) (GluR-6) (GluR6) (Glutamate receptor beta-2) (GluR beta-2)	Grik2 Glur6	Mus musculus (Mouse)	908
P42260	GRIK2_RAT	reviewed	Glutamate receptor, ionotropic kainate 2 (Glutamate receptor 6) (GluR-6) (GluR6)	Grik2 Glur6	Rattus norvegicus (Rat)	908
O00222	GRM8_HUMAN	reviewed	Metabotropic glutamate receptor 8 (mGluR8)	GRM8 GPRC1H MGLUR8	Homo sapiens (Human)	908
P47743	GRM8_MOUSE	reviewed	Metabotropic glutamate receptor 8 (mGluR8)	Grm8 Gprc1h Mglur8	Mus musculus (Mouse)	908
P70579	GRM8_RAT	reviewed	Metabotropic glutamate receptor 8 (mGluR8)	Grm8 Gprc1h Mglur8	Rattus norvegicus (Rat)	908
Q04322	GYL1_YEAST	reviewed	Probable GTPase-activating protein GYL1 (GYP5-like protein 1)	GYL1 APP2 YMR192W YM9646.04	Saccharomyces cerevisiae (strain ATCC 204508 / S288c) (Baker's yeast)	720
Q74ZL4	H2A1_ASHGO	reviewed	Histone H2A.1	HTA1 AGR184W	Ashbya gossypii (strain ATCC 10895 / CBS 109.51 / FGSC 9923 / NRRL Y-1056) (Yeast) (Eremothecium gossypii)	131
A3LZZ0	H2A1_PICST	reviewed	Histone H2A.1	HTA2 PICST_37161	Scheffersomyces stipitis (strain ATCC 58785 / CBS 6054 / NBRC 10063 / NRRL Y-11545) (Yeast) (Pichia stipitis)	131
P04911	H2A1_YEAST	reviewed	Histone H2A.1	HTA1 H2A1 SPT11 YDR225W YD9934.10	Saccharomyces cerevisiae (strain ATCC 204508 / S288c) (Baker's yeast)	132
Q757L4	H2A2_ASHGO	reviewed	Histone H2A.2	HTA2 AEL003C	Ashbya gossypii (strain ATCC 10895 / CBS 109.51 / FGSC 9923 / NRRL Y-1056) (Yeast) (Eremothecium gossypii)	131
A5DJJ2	H2A2_PICGU	reviewed	Histone H2A.2	HTA2 PGUG_03443	Meyerozyma guilliermondii (strain ATCC 6260 / CBS 566 / DSM 6381 / JCM 1539 / NBRC 10279 / NRRL Y-324) (Yeast) (Candida guilliermondii)	130
A3LXE7	H2A2_PICST	reviewed	Histone H2A.2	HTA2 PICST_73490	Scheffersomyces stipitis (strain ATCC 58785 / CBS 6054 / NBRC 10063 / NRRL Y-11545) (Yeast) (Pichia stipitis)	131
P04912	H2A2_YEAST	reviewed	Histone H2A.2	HTA2 H2A2 YBL003C YBL0103	Saccharomyces cerevisiae (strain ATCC 204508 / S288c) (Baker's yeast)	132
Q74ZL5	H2B1_ASHGO	reviewed	Histone H2B.1	HTB1 AGR183C	Ashbya gossypii (strain ATCC 10895 / CBS 109.51 / FGSC 9923 / NRRL Y-1056) (Yeast) (Eremothecium gossypii)	132
P48989	H2B1_CANAL	reviewed	Histone H2B.1	HTB1 CaO19.6925 CaO19.14187	Candida albicans (strain SC5314 / ATCC MYA-2876) (Yeast)	130
Q6FWM8	H2B1_CANGA	reviewed	Histone H2B.1	HTB1 CAGL0C04389g	Candida glabrata (strain ATCC 2001 / CBS 138 / JCM 3761 / NBRC 0622 / NRRL Y-65) (Yeast) (Torulopsis glabrata)	129
Q6BRG2	H2B1_DEBHA	reviewed	Histone H2B.1	HTB1 DEHA2D16610g	Debaryomyces hansenii (strain ATCC 36239 / CBS 767 / JCM 1990 / NBRC 0083 / IGC 2968) (Yeast) (Torulaspora hansenii)	130
Q6CK60	H2B1_KLULA	reviewed	Histone H2B.1	HTB1 KLLA0F13310g	Kluyveromyces lactis (strain ATCC 8585 / CBS 2359 / DSM 70799 / NBRC 1267 / NRRL Y-1140 / WM37) (Yeast) (Candida sphaerica)	132
A5DJJ1	H2B1_PICGU	reviewed	Histone H2B.1	HTB1 PGUG_03442	Meyerozyma guilliermondii (strain ATCC 6260 / CBS 566 / DSM 6381 / JCM 1539 / NBRC 10279 / NRRL Y-324) (Yeast) (Candida guilliermondii)	129
P04913	H2B1_SCHPO	reviewed	Histone H2B-alpha (H2B.1)	htb1 SPCC622.09	Schizosaccharomyces pombe (strain 972 / ATCC 24843) (Fission yeast)	126
P02293	H2B1_YEAST	reviewed	Histone H2B.1 (Suppressor of Ty protein 12)	HTB1 H2B1 SPT12 YDR224C YD9934.09C	Saccharomyces cerevisiae (strain ATCC 204508 / S288c) (Baker's yeast)	131
Q8J1F8	H2B2_ASHGO	reviewed	Histone H2B.2	HTB2 AEL002W	Ashbya gossypii (strain ATCC 10895 / CBS 109.51 / FGSC 9923 / NRRL Y-1056) (Yeast) (Eremothecium gossypii)	127
Q59VP1	H2B2_CANAL	reviewed	Histone H2B.2	HTB2 CaO19.1052 CaO19.8654	Candida albicans (strain SC5314 / ATCC MYA-2876) (Yeast)	130
Q6FM30	H2B2_CANGA	reviewed	Histone H2B.2	HTB2 CAGL0K11462g	Candida glabrata (strain ATCC 2001 / CBS 138 / JCM 3761 / NBRC 0622 / NRRL Y-65) (Yeast) (Torulopsis glabrata)	131
Q6BKW7	H2B2_DEBHA	reviewed	Histone H2B.2	HTB2 DEHA2F18304g	Debaryomyces hansenii (strain ATCC 36239 / CBS 767 / JCM 1990 / NBRC 0083 / IGC 2968) (Yeast) (Torulaspora hansenii)	129
Q6CMV8	H2B2_KLULA	reviewed	Histone H2B.2	HTB1 KLLA0E17391g	Kluyveromyces lactis (strain ATCC 8585 / CBS 2359 / DSM 70799 / NBRC 1267 / NRRL Y-1140 / WM37) (Yeast) (Candida sphaerica)	132
A5DBG5	H2B2_PICGU	reviewed	Histone H2B.2	HTB2 PGUG_00620	Meyerozyma guilliermondii (strain ATCC 6260 / CBS 566 / DSM 6381 / JCM 1539 / NBRC 10279 / NRRL Y-324) (Yeast) (Candida guilliermondii)	129
A3LXE6	H2B2_PICST	reviewed	Histone H2B.2	HTB2 PICST_73488	Scheffersomyces stipitis (strain ATCC 58785 / CBS 6054 / NBRC 10063 / NRRL Y-11545) (Yeast) (Pichia stipitis)	131
P02294	H2B2_YEAST	reviewed	Histone H2B.2	HTB2 H2B2 YBL002W YBL0104	Saccharomyces cerevisiae (strain ATCC 204508 / S288c) (Baker's yeast)	131
P78567	H2B_AGABI	reviewed	Histone H2B	htbA	Agaricus bisporus (Common mushroom)	143
Q7Z9J4	H2B_AJECA	reviewed	Histone H2B	HTB1	Ajellomyces capsulata (Darling's disease fungus) (Histoplasma capsulatum)	138
A1CJ09	H2B_ASPCL	reviewed	Histone H2B	htb1 ACLA_033360	Aspergillus clavatus (strain ATCC 1007 / CBS 513.65 / DSM 816 / NCTC 3887 / NRRL 1)	140
Q4WWC5	H2B_ASPFU	reviewed	Histone H2B	htb1 AFUA_3G05350	Neosartorya fumigata (strain ATCC MYA-4609 / Af293 / CBS 101355 / FGSC A1100) (Aspergillus fumigatus)	140
A2QY49	H2B_ASPNC	reviewed	Histone H2B	htb1 An11g11310	Aspergillus niger (strain CBS 513.88 / FGSC A1513)	141
Q2U5A9	H2B_ASPOR	reviewed	Histone H2B	htb1 AO090020000006	Aspergillus oryzae (strain ATCC 42149 / RIB 40) (Yellow koji mold)	141
Q0CBD1	H2B_ASPTN	reviewed	Histone H2B	htb1 ATEG_09003	Aspergillus terreus (strain NIH 2624 / FGSC A1156)	140
Q2HH38	H2B_CHAGB	reviewed	Histone H2B	HTB1 CHGG_00466	Chaetomium globosum (strain ATCC 6205 / CBS 148.51 / DSM 1962 / NBRC 6347 / NRRL 1970) (Soil fungus)	137
Q1E5N0	H2B_COCIM	reviewed	Histone H2B	HTB1 CIMG_02133	Coccidioides immitis (strain RS) (Valley fever fungus)	139
P0CO03	H2B_CRYNB	reviewed	Histone H2B	HTB1 CNBB5140	Cryptococcus neoformans var. neoformans serotype D (strain B-3501A) (Filobasidiella neoformans)	139
P0CO02	H2B_CRYNJ	reviewed	Histone H2B	HTB1 CNB00560	Cryptococcus neoformans var. neoformans serotype D (strain JEC21 / ATCC MYA-565) (Filobasidiella neoformans)	139
P23754	H2B_EMENI	reviewed	Histone H2B	htbA htb1 AN3469	Emericella nidulans (strain FGSC A4 / ATCC 38163 / CBS 112.46 / NRRL 194 / M139) (Aspergillus nidulans)	140
Q4HTT2	H2B_GIBZE	reviewed	Histone H2B	HTB1 FG11626	Gibberella zeae (strain PH-1 / ATCC MYA-4620 / FGSC 9075 / NRRL 31084) (Wheat head blight fungus) (Fusarium graminearum)	137
A5DWF0	H2B_LODEL	reviewed	Histone H2B	HTB1 LELG_01686	Lodderomyces elongisporus (strain ATCC 11503 / CBS 2605 / JCM 1781 / NBRC 1676 / NRRL YB-4239) (Yeast) (Saccharomyces elongisporus)	131
Q5G577	H2B_MAGO7	reviewed	Histone H2B	HTB1 MGG_03578	Magnaporthe oryzae (strain 70-15 / ATCC MYA-4617 / FGSC 8958) (Rice blast fungus) (Pyricularia oryzae)	137
A1D8G9	H2B_NEOFI	reviewed	Histone H2B	htb1 NFIA_071840	Neosartorya fischeri (strain ATCC 1020 / DSM 3700 / FGSC A1164 / NRRL 181) (Aspergillus fischerianus)	140
P37210	H2B_NEUCR	reviewed	Histone H2B	hh2b NCU02435	Neurospora crassa (strain ATCC 24698 / 74-OR23-1A / CBS 708.71 / DSM 1257 / FGSC 987)	137
Q0U1A0	H2B_PHANO	reviewed	Histone H2B	HTB1 SNOG_14612	Phaeosphaeria nodorum (strain SN15 / ATCC MYA-4574 / FGSC 10173) (Glume blotch fungus) (Septoria nodorum)	140
Q875B7	H2B_PODAS	reviewed	Histone H2B	HTB1 Pa5D0007	Podospora anserina (Pleurage anserina)	137
Q8J1K2	H2B_ROSNE	reviewed	Histone H2B	hh2b htb1	Rosellinia necatrix (White root-rot fungus)	136
Q4PEF8	H2B_USTMA	reviewed	Histone H2B	HTB1 UM01505	Ustilago maydis (strain 521 / FGSC 9021) (Smut fungus)	142
Q6C4I7	H2B_YARLI	reviewed	Histone H2B	HTB1 YALI0E26455g	Yarrowia lipolytica (strain CLIB 122 / E 150) (Yeast) (Candida lipolytica)	139
Q32PJ8	HDAC1_BOVIN	reviewed	Histone deacetylase 1 (HD1) (EC 3.5.1.98)	HDAC1	Bos taurus (Bovine)	482
Q13547	HDAC1_HUMAN	reviewed	Histone deacetylase 1 (HD1) (EC 3.5.1.98)	HDAC1 RPD3L1	Homo sapiens (Human)	482
O09106	HDAC1_MOUSE	reviewed	Histone deacetylase 1 (HD1) (EC 3.5.1.98)	Hdac1	Mus musculus (Mouse)	482
Q5RAG0	HDAC1_PONAB	reviewed	Histone deacetylase 1 (HD1) (EC 3.5.1.98)	HDAC1	Pongo abelii (Sumatran orangutan)	482
Q4QQW4	HDAC1_RAT	reviewed	Histone deacetylase 1 (HD1) (EC 3.5.1.98)	Hdac1	Rattus norvegicus (Rat)	482
P56524	HDAC4_HUMAN	reviewed	Histone deacetylase 4 (HD4) (EC 3.5.1.98)	HDAC4 KIAA0288	Homo sapiens (Human)	1084
Q6NZM9	HDAC4_MOUSE	reviewed	Histone deacetylase 4 (HD4) (EC 3.5.1.98)	Hdac4	Mus musculus (Mouse)	1076
Q99P99	HDAC4_RAT	reviewed	Histone deacetylase 4 (HD4) (EC 3.5.1.98)	Hdac4	Rattus norvegicus (Rat)	1077
Q9XSK7	HDGF_BOVIN	reviewed	Hepatoma-derived growth factor (HDGF)	HDGF	Bos taurus (Bovine)	239
P51858	HDGF_HUMAN	reviewed	Hepatoma-derived growth factor (HDGF) (High mobility group protein 1-like 2) (HMG-1L2)	HDGF HMG1L2	Homo sapiens (Human)	240
P51859	HDGF_MOUSE	reviewed	Hepatoma-derived growth factor (HDGF)	Hdgf Tdrm1	Mus musculus (Mouse)	237
Q8VHK7	HDGF_RAT	reviewed	Hepatoma-derived growth factor (HDGF)	Hdgf	Rattus norvegicus (Rat)	237
Q14526	HIC1_HUMAN	reviewed	Hypermethylated in cancer 1 protein (Hic-1) (Zinc finger and BTB domain-containing protein 29)	HIC1 ZBTB29	Homo sapiens (Human)	733
Q9R1Y5	HIC1_MOUSE	reviewed	Hypermethylated in cancer 1 protein (Hic-1)	Hic1	Mus musculus (Mouse)	733
Q16665	HIF1A_HUMAN	reviewed	Hypoxia-inducible factor 1-alpha (HIF-1-alpha) (HIF1-alpha) (ARNT-interacting protein) (Basic-helix-loop-helix-PAS protein MOP1) (Class E basic helix-loop-helix protein 78) (bHLHe78) (Member of PAS protein 1) (PAS domain-containing protein 8)	HIF1A BHLHE78 MOP1 PASD8	Homo sapiens (Human)	826
Q61221	HIF1A_MOUSE	reviewed	Hypoxia-inducible factor 1-alpha (HIF-1-alpha) (HIF1-alpha) (ARNT-interacting protein)	Hif1a	Mus musculus (Mouse)	836
Q86Z02	HIPK1_HUMAN	reviewed	Homeodomain-interacting protein kinase 1 (EC 2.7.11.1) (Nuclear body-associated kinase 2)	HIPK1 KIAA0630 MYAK NBAK2	Homo sapiens (Human)	1210
O88904	HIPK1_MOUSE	reviewed	Homeodomain-interacting protein kinase 1 (EC 2.7.11.1) (Nuclear body-associated kinase 2) (Protein kinase Myak)	Hipk1 Kiaa0630 Myak Nbak2	Mus musculus (Mouse)	1210
A4L9P5	HIPK1_RAT	reviewed	Homeodomain-interacting protein kinase 1 (EC 2.7.11.1)	Hipk1	Rattus norvegicus (Rat)	1211
Q9H2X6	HIPK2_HUMAN	reviewed	Homeodomain-interacting protein kinase 2 (hHIPk2) (EC 2.7.11.1)	HIPK2	Homo sapiens (Human)	1198
Q9WUM7	HIPK2_MESAU	reviewed	Homeodomain-interacting protein kinase 2 (EC 2.7.11.1) (Mx-interacting protein kinase) (PKM)	Hipk2	Mesocricetus auratus (Golden hamster)	1168
Q9QZR5	HIPK2_MOUSE	reviewed	Homeodomain-interacting protein kinase 2 (EC 2.7.11.1) (Nuclear body-associated kinase 1) (Sialophorin tail-associated nuclear serine/threonine-protein kinase)	Hipk2 Nbak1 Stank	Mus musculus (Mouse)	1196
Q9H422	HIPK3_HUMAN	reviewed	Homeodomain-interacting protein kinase 3 (EC 2.7.11.1) (Androgen receptor-interacting nuclear protein kinase) (ANPK) (Fas-interacting serine/threonine-protein kinase) (FIST) (Homolog of protein kinase YAK1)	HIPK3 DYRK6 FIST3 PKY	Homo sapiens (Human)	1215
Q9ERH7	HIPK3_MOUSE	reviewed	Homeodomain-interacting protein kinase 3 (EC 2.7.11.1) (Androgen receptor-interacting nuclear protein kinase) (ANPK) (Fas-interacting serine/threonine-protein kinase) (FIST) (Nuclear body-associated kinase 3) (Nbak3)	Hipk3 Fist3	Mus musculus (Mouse)	1192
P07910	HNRPC_HUMAN	reviewed	Heterogeneous nuclear ribonucleoproteins C1/C2 (hnRNP C1/C2)	HNRNPC HNRPC	Homo sapiens (Human)	306
Q9Z204	HNRPC_MOUSE	reviewed	Heterogeneous nuclear ribonucleoproteins C1/C2 (hnRNP C1/C2)	Hnrnpc Hnrpc	Mus musculus (Mouse)	313
Q5RA82	HNRPC_PONAB	reviewed	Heterogeneous nuclear ribonucleoprotein C (hnRNP C)	HNRNPC HNRPC	Pongo abelii (Sumatran orangutan)	306
O77768	HNRPC_RABIT	reviewed	Heterogeneous nuclear ribonucleoprotein C (hnRNP C)	HNRNPC	Oryctolagus cuniculus (Rabbit)	306
Q5E9J1	HNRPF_BOVIN	reviewed	Heterogeneous nuclear ribonucleoprotein F (hnRNP F) [Cleaved into: Heterogeneous nuclear ribonucleoprotein F, N-terminally processed]	HNRNPF HNRPF	Bos taurus (Bovine)	414
P52597	HNRPF_HUMAN	reviewed	Heterogeneous nuclear ribonucleoprotein F (hnRNP F) (Nucleolin-like protein mcs94-1) [Cleaved into: Heterogeneous nuclear ribonucleoprotein F, N-terminally processed]	HNRNPF HNRPF	Homo sapiens (Human)	415
Q60HC3	HNRPF_MACFA	reviewed	Heterogeneous nuclear ribonucleoprotein F (hnRNP F) [Cleaved into: Heterogeneous nuclear ribonucleoprotein F, N-terminally processed]	HNRNPF HNRPF QflA-17741 QtsA-10715	Macaca fascicularis (Crab-eating macaque) (Cynomolgus monkey)	415
Q9Z2X1	HNRPF_MOUSE	reviewed	Heterogeneous nuclear ribonucleoprotein F (hnRNP F) [Cleaved into: Heterogeneous nuclear ribonucleoprotein F, N-terminally processed]	Hnrnpf Hnrpf	Mus musculus (Mouse)	415
Q794E4	HNRPF_RAT	reviewed	Heterogeneous nuclear ribonucleoprotein F (hnRNP F) [Cleaved into: Heterogeneous nuclear ribonucleoprotein F, N-terminally processed]	Hnrnpf Hnrpf	Rattus norvegicus (Rat)	415
A3LZZ1	HSB1_PICST	reviewed	Histone H2B.1	HTB1 PICST_85793	Scheffersomyces stipitis (strain ATCC 58785 / CBS 6054 / NBRC 10063 / NRRL Y-11545) (Yeast) (Pichia stipitis)	131
Q08DJ8	HSF1_BOVIN	reviewed	Heat shock factor protein 1 (HSF 1) (Heat shock transcription factor 1) (HSTF 1)	HSF1	Bos taurus (Bovine)	525
Q00613	HSF1_HUMAN	reviewed	Heat shock factor protein 1 (HSF 1) (Heat shock transcription factor 1) (HSTF 1)	HSF1 HSTF1	Homo sapiens (Human)	529
P38532	HSF1_MOUSE	reviewed	Heat shock factor protein 1 (HSF 1) (Heat shock transcription factor 1) (HSTF 1)	Hsf1	Mus musculus (Mouse)	525
Q1HGE8	HSF4_CANFA	reviewed	Heat shock factor protein 4 (HSF 4) (Heat shock transcription factor 4) (HSTF 4)	HSF4	Canis familiaris (Dog) (Canis lupus familiaris)	492
Q9ULV5	HSF4_HUMAN	reviewed	Heat shock factor protein 4 (HSF 4) (hHSF4) (Heat shock transcription factor 4) (HSTF 4)	HSF4	Homo sapiens (Human)	492
Q9R0L1	HSF4_MOUSE	reviewed	Heat shock factor protein 4 (HSF 4) (mHSF4) (Heat shock transcription factor 4) (HSTF 4)	Hsf4	Mus musculus (Mouse)	492
O80982	HSFA2_ARATH	reviewed	Heat stress transcription factor A-2 (AtHsfA2) (AtHsf-04)	HSFA2 HSF04 At2g26150 T19L18.4	Arabidopsis thaliana (Mouse-ear cress)	345
Q9UBD0	HSFX1_HUMAN	reviewed	Heat shock transcription factor, X-linked	HSFX1 LW-1; HSFX2	Homo sapiens (Human)	423
Q9LSE2	ICE1_ARATH	reviewed	Transcription factor ICE1 (Basic helix-loop-helix protein 116) (AtbHLH116) (bHLH 116) (Inducer of CBF expression 1) (Transcription factor EN 45) (Transcription factor SCREAM) (bHLH transcription factor bHLH116)	SCRM BHLH116 EN45 ICE1 At3g26744 MLJ15.14 MDJ14.1	Arabidopsis thaliana (Mouse-ear cress)	494
Q16666	IF16_HUMAN	reviewed	Gamma-interferon-inducible protein 16 (Ifi-16) (Interferon-inducible myeloid differentiation transcriptional activator)	IFI16 IFNGIP1	Homo sapiens (Human)	785
Q9UG01	IF172_HUMAN	reviewed	Intraflagellar transport protein 172 homolog	IFT172 KIAA1179	Homo sapiens (Human)	1749
Q6VH22	IF172_MOUSE	reviewed	Intraflagellar transport protein 172 homolog (Protein wimple)	Ift172 Kiaa1179 Wim	Mus musculus (Mouse)	1749
Q9JKU3	IF172_RAT	reviewed	Intraflagellar transport protein 172 homolog (Selective LIM-binding factor)	Ift172 Slb	Rattus norvegicus (Rat)	1749
P25963	IKBA_HUMAN	reviewed	NF-kappa-B inhibitor alpha (I-kappa-B-alpha) (IkB-alpha) (IkappaBalpha) (Major histocompatibility complex enhancer-binding protein MAD3)	NFKBIA IKBA MAD3 NFKBI	Homo sapiens (Human)	317
Q08353	IKBA_PIG	reviewed	NF-kappa-B inhibitor alpha (ECI-6) (I-kappa-B-alpha) (IkB-alpha) (IkappaBalpha)	NFKBIA IKBA	Sus scrofa (Pig)	314
Q63746	IKBA_RAT	reviewed	NF-kappa-B inhibitor alpha (I-kappa-B-alpha) (IkB-alpha) (IkappaBalpha) (RL/IF-1)	Nfkbia Ikba	Rattus norvegicus (Rat)	314
Q14164	IKKE_HUMAN	reviewed	Inhibitor of nuclear factor kappa-B kinase subunit epsilon (I-kappa-B kinase epsilon) (IKK-E) (IKK-epsilon) (IkBKE) (EC 2.7.11.10) (Inducible I kappa-B kinase) (IKK-i)	IKBKE IKKE IKKI KIAA0151	Homo sapiens (Human)	716
Q9R0T8	IKKE_MOUSE	reviewed	Inhibitor of nuclear factor kappa-B kinase subunit epsilon (I-kappa-B kinase epsilon) (IKK-E) (IKK-epsilon) (IkBKE) (EC 2.7.11.10) (Inducible I kappa-B kinase) (IKK-i)	Ikbke Ikke Ikki	Mus musculus (Mouse)	717
Q13422	IKZF1_HUMAN	reviewed	DNA-binding protein Ikaros (Ikaros family zinc finger protein 1) (Lymphoid transcription factor LyF-1)	IKZF1 IK1 IKAROS LYF1 ZNFN1A1	Homo sapiens (Human)	519
Q03267	IKZF1_MOUSE	reviewed	DNA-binding protein Ikaros (Ikaros family zinc finger protein 1) (Lymphoid transcription factor LyF-1)	Ikzf1 Ikaros Lyf1 Zfpn1a1 Znfn1a1	Mus musculus (Mouse)	517
Q3SZP0	IRF1_BOVIN	reviewed	Interferon regulatory factor 1 (IRF-1)	IRF1	Bos taurus (Bovine)	322
Q90876	IRF1_CHICK	reviewed	Interferon regulatory factor 1 (IRF-1)	IRF1	Gallus gallus (Chicken)	313
P10914	IRF1_HUMAN	reviewed	Interferon regulatory factor 1 (IRF-1)	IRF1	Homo sapiens (Human)	325
P15314	IRF1_MOUSE	reviewed	Interferon regulatory factor 1 (IRF-1)	Irf1	Mus musculus (Mouse)	329
A0FIN4	IRF1_PIG	reviewed	Interferon regulatory factor 1 (IRF-1)	IRF1	Sus scrofa (Pig)	322
P23570	IRF1_RAT	reviewed	Interferon regulatory factor 1 (IRF-1)	Irf1	Rattus norvegicus (Rat)	328
Q98925	IRF2_CHICK	reviewed	Interferon regulatory factor 2 (IRF-2)	IRF2	Gallus gallus (Chicken)	348
P14316	IRF2_HUMAN	reviewed	Interferon regulatory factor 2 (IRF-2)	IRF2	Homo sapiens (Human)	349
P23906	IRF2_MOUSE	reviewed	Interferon regulatory factor 2 (IRF-2)	Irf2	Mus musculus (Mouse)	349
Q8R4E0	IRF2_SIGHI	reviewed	Interferon regulatory factor 2 (IRF-2)	IRF2	Sigmodon hispidus (Hispid cotton rat)	349
Q92993	KAT5_HUMAN	reviewed	Histone acetyltransferase KAT5 (EC 2.3.1.48) (60 kDa Tat-interactive protein) (Tip60) (Histone acetyltransferase HTATIP) (HIV-1 Tat interactive protein) (Lysine acetyltransferase 5) (cPLA(2)-interacting protein)	KAT5 HTATIP TIP60	Homo sapiens (Human)	513
Q8CHK4	KAT5_MOUSE	reviewed	Histone acetyltransferase KAT5 (EC 2.3.1.48) (60 kDa Tat-interactive protein) (Tip60) (Histone acetyltransferase HTATIP) (Lysine acetyltransferase 5)	Kat5 Htatip Tip60	Mus musculus (Mouse)	513
Q5RBG4	KAT5_PONAB	reviewed	Histone acetyltransferase KAT5 (EC 2.3.1.48) (60 kDa Tat-interactive protein) (Tip60) (Histone acetyltransferase HTATIP) (Lysine acetyltransferase 5)	KAT5 HTATIP TIP60	Pongo abelii (Sumatran orangutan)	461
Q99MK2	KAT5_RAT	reviewed	Histone acetyltransferase KAT5 (EC 2.3.1.48) (60 kDa Tat-interactive protein) (Tip60) (Histone acetyltransferase HTATIP) (Lysine acetyltransferase 5)	Kat5 Htatip Tip60 Tip60b	Rattus norvegicus (Rat)	513
P22460	KCNA5_HUMAN	reviewed	Potassium voltage-gated channel subfamily A member 5 (HPCN1) (Voltage-gated potassium channel HK2) (Voltage-gated potassium channel subunit Kv1.5)	KCNA5	Homo sapiens (Human)	613
Q61762	KCNA5_MOUSE	reviewed	Potassium voltage-gated channel subfamily A member 5 (Voltage-gated potassium channel subunit Kv1.5) (KV1-5)	Kcna5	Mus musculus (Mouse)	602
P79197	KCNA5_MUSPF	reviewed	Potassium voltage-gated channel subfamily A member 5 (Voltage-gated potassium channel subunit Kv1.5)	KCNA5	Mustela putorius furo (European domestic ferret) (Mustela furo)	601
P50638	KCNA5_RABIT	reviewed	Potassium voltage-gated channel subfamily A member 5 (Voltage-gated potassium channel subunit Kv1.5)	KCNA5	Oryctolagus cuniculus (Rabbit)	598
P19024	KCNA5_RAT	reviewed	Potassium voltage-gated channel subfamily A member 5 (RCK7) (RK4) (Voltage-gated potassium channel subunit Kv1.5)	Kcna5	Rattus norvegicus (Rat)	602
Q13351	KLF1_HUMAN	reviewed	Krueppel-like factor 1 (Erythroid krueppel-like transcription factor) (EKLF)	KLF1 EKLF	Homo sapiens (Human)	362
P46099	KLF1_MOUSE	reviewed	Krueppel-like factor 1 (Erythroid krueppel-like transcription factor) (EKLF)	Klf1 Elkf	Mus musculus (Mouse)	358
P57682	KLF3_HUMAN	reviewed	Krueppel-like factor 3 (Basic krueppel-like factor) (CACCC-box-binding protein BKLF) (TEF-2)	KLF3 BKLF	Homo sapiens (Human)	345
Q60980	KLF3_MOUSE	reviewed	Krueppel-like factor 3 (Basic krueppel-like factor) (CACCC-box-binding protein BKLF) (TEF-2)	Klf3 Bklf	Mus musculus (Mouse)	344
O95600	KLF8_HUMAN	reviewed	Krueppel-like factor 8 (Basic krueppel-like factor 3) (Zinc finger protein 741)	KLF8 BKLF3 ZNF741	Homo sapiens (Human)	359
Q8BLM0	KLF8_MOUSE	reviewed	Krueppel-like factor 8	Klf8	Mus musculus (Mouse)	355
Q9CAE3	LDL3_ARATH	reviewed	Lysine-specific histone demethylase 1 homolog 3 (EC 1.-.-.-) (Flavin-containing amine oxidase domain-containing protein 3) (Protein FLOWERING LOCUS D) (Protein LSD1-LIKE 3) (Protein SUPPRESSOR OF OVEREXPRESSED FCA 1)	FLD SOF1 At3g10390 F13M14.34 F14P13.1	Arabidopsis thaliana (Mouse-ear cress)	789
Q9UJU2	LEF1_HUMAN	reviewed	Lymphoid enhancer-binding factor 1 (LEF-1) (T cell-specific transcription factor 1-alpha) (TCF1-alpha)	LEF1	Homo sapiens (Human)	399
P27782	LEF1_MOUSE	reviewed	Lymphoid enhancer-binding factor 1 (LEF-1)	Lef1 Lef-1	Mus musculus (Mouse)	397
Q9QXN1	LEF1_RAT	reviewed	Lymphoid enhancer-binding factor 1 (LEF-1)	Lef1	Rattus norvegicus (Rat)	397
P20154	LIN11_CAEEL	reviewed	Protein lin-11 (Abnormal cell lineage protein 11)	lin-11 ZC247.3	Caenorhabditis elegans	405
P02545	LMNA_HUMAN	reviewed	Prelamin-A/C [Cleaved into: Lamin-A/C (70 kDa lamin) (Renal carcinoma antigen NY-REN-32)]	LMNA LMN1	Homo sapiens (Human)	664
P48678	LMNA_MOUSE	reviewed	Prelamin-A/C [Cleaved into: Lamin-A/C]	Lmna Lmn1	Mus musculus (Mouse)	665
Q3ZD69	LMNA_PIG	reviewed	Prelamin-A/C [Cleaved into: Lamin-A/C]	LMNA	Sus scrofa (Pig)	664
P48679	LMNA_RAT	reviewed	Prelamin-A/C [Cleaved into: Lamin-A/C]	Lmna Lmn1	Rattus norvegicus (Rat)	665
Q14693	LPIN1_HUMAN	reviewed	Phosphatidate phosphatase LPIN1 (EC 3.1.3.4) (Lipin-1)	LPIN1 KIAA0188	Homo sapiens (Human)	890
Q91ZP3	LPIN1_MOUSE	reviewed	Phosphatidate phosphatase LPIN1 (EC 3.1.3.4) (Fatty liver dystrophy protein) (Lipin-1)	Lpin1 Fld	Mus musculus (Mouse)	924
Q9Y5Q3	MAFB_HUMAN	reviewed	Transcription factor MafB (Maf-B) (V-maf musculoaponeurotic fibrosarcoma oncogene homolog B)	MAFB KRML	Homo sapiens (Human)	323
Q2PFS4	MAFB_MACFA	reviewed	Transcription factor MafB (Maf-B) (V-maf musculoaponeurotic fibrosarcoma oncogene homolog B)	MAFB QnpA-17255	Macaca fascicularis (Crab-eating macaque) (Cynomolgus monkey)	323
P54841	MAFB_MOUSE	reviewed	Transcription factor MafB (Maf-B) (Kreisler) (Segmentation protein Kr) (Transcription factor Maf-1) (V-maf musculoaponeurotic fibrosarcoma oncogene homolog B)	Mafb Krml Maf1	Mus musculus (Mouse)	323
P54842	MAFB_RAT	reviewed	Transcription factor MafB (Maf-B) (Transcription factor Maf-1) (V-maf musculoaponeurotic fibrosarcoma oncogene homolog B)	Mafb Maf1	Rattus norvegicus (Rat)	323
A5PJV0	MAFG_BOVIN	reviewed	Transcription factor MafG (V-maf musculoaponeurotic fibrosarcoma oncogene homolog G)	MAFG	Bos taurus (Bovine)	162
Q90889	MAFG_CHICK	reviewed	Transcription factor MafG (V-maf musculoaponeurotic fibrosarcoma oncogene homolog G)	MAFG	Gallus gallus (Chicken)	162
O15525	MAFG_HUMAN	reviewed	Transcription factor MafG (V-maf musculoaponeurotic fibrosarcoma oncogene homolog G) (hMAF)	MAFG	Homo sapiens (Human)	162
O54790	MAFG_MOUSE	reviewed	Transcription factor MafG (V-maf musculoaponeurotic fibrosarcoma oncogene homolog G)	Mafg	Mus musculus (Mouse)	162
Q76MX4	MAFG_RAT	reviewed	Transcription factor MafG (V-maf musculoaponeurotic fibrosarcoma oncogene homolog G)	Mafg	Rattus norvegicus (Rat)	189
P49136	MAPK2_CRILO	reviewed	MAP kinase-activated protein kinase 2 (MAPK-activated protein kinase 2) (MAPKAP kinase 2) (MAPKAP-K2) (MAPKAPK-2) (MK-2) (MK2) (EC 2.7.11.1) (P45-54 HSP27 kinase) (Fragment)	MAPKAPK2	Cricetulus longicaudatus (Long-tailed dwarf hamster) (Chinese hamster)	329
P49137	MAPK2_HUMAN	reviewed	MAP kinase-activated protein kinase 2 (MAPK-activated protein kinase 2) (MAPKAP kinase 2) (MAPKAP-K2) (MAPKAPK-2) (MK-2) (MK2) (EC 2.7.11.1)	MAPKAPK2	Homo sapiens (Human)	400
P49138	MAPK2_MOUSE	reviewed	MAP kinase-activated protein kinase 2 (MAPK-activated protein kinase 2) (MAPKAP kinase 2) (MAPKAP-K2) (MAPKAPK-2) (MK-2) (MK2) (EC 2.7.11.1)	Mapkapk2 Rps6kc1	Mus musculus (Mouse)	386
P49139	MAPK2_RABIT	reviewed	MAP kinase-activated protein kinase 2 (MAPK-activated protein kinase 2) (MAPKAP kinase 2) (MAPKAP-K2) (MAPKAPK-2) (MK-2) (MK2) (EC 2.7.11.1) (Fragment)	MAPKAPK2	Oryctolagus cuniculus (Rabbit)	366
Q9UIS9	MBD1_HUMAN	reviewed	Methyl-CpG-binding domain protein 1 (CXXC-type zinc finger protein 3) (Methyl-CpG-binding protein MBD1) (Protein containing methyl-CpG-binding domain 1)	MBD1 CXXC3 PCM1	Homo sapiens (Human)	605
Q9Z2E2	MBD1_MOUSE	reviewed	Methyl-CpG-binding domain protein 1 (Methyl-CpG-binding protein MBD1)	Mbd1	Mus musculus (Mouse)	636
Q6VMQ6	MCAF1_HUMAN	reviewed	Activating transcription factor 7-interacting protein 1 (ATF-interacting protein) (ATF-IP) (ATF7-interacting protein) (ATFa-associated modulator) (hAM) (MBD1-containing chromatin-associated factor 1) (P621)	ATF7IP MCAF MCAF1	Homo sapiens (Human)	1270
Q7TT18	MCAF1_MOUSE	reviewed	Activating transcription factor 7-interacting protein 1 (ATFa-associated modulator) (mAM) (MBD1-containing chromatin-associated factor 1)	Atf7ip Mcaf1	Mus musculus (Mouse)	1306
A2VDZ3	MEF2A_BOVIN	reviewed	Myocyte-specific enhancer factor 2A	MEF2A	Bos taurus (Bovine)	492
Q9W6U8	MEF2A_CHICK	reviewed	Myocyte-specific enhancer factor 2A	MEF2A	Gallus gallus (Chicken)	499
Q02078	MEF2A_HUMAN	reviewed	Myocyte-specific enhancer factor 2A (Serum response factor-like protein 1)	MEF2A MEF2	Homo sapiens (Human)	507
Q60929	MEF2A_MOUSE	reviewed	Myocyte-specific enhancer factor 2A	Mef2a	Mus musculus (Mouse)	498
A2ICN5	MEF2A_PIG	reviewed	Myocyte-specific enhancer factor 2A	MEF2A	Sus scrofa (Pig)	507
Q5REW7	MEF2A_PONAB	reviewed	Myocyte-specific enhancer factor 2A	MEF2A	Pongo abelii (Sumatran orangutan)	494
Q2MJT0	MEF2A_RAT	reviewed	Myocyte-specific enhancer factor 2A	Mef2a	Rattus norvegicus (Rat)	495
Q06413	MEF2C_HUMAN	reviewed	Myocyte-specific enhancer factor 2C	MEF2C	Homo sapiens (Human)	473
Q8CFN5	MEF2C_MOUSE	reviewed	Myocyte-specific enhancer factor 2C	Mef2c	Mus musculus (Mouse)	474
A4UTP7	MEF2C_PIG	reviewed	Myocyte-specific enhancer factor 2C	MEF2C	Sus scrofa (Pig)	463
Q5R444	MEF2C_PONAB	reviewed	Myocyte-specific enhancer factor 2C	MEF2C	Pongo abelii (Sumatran orangutan)	473
Q14814	MEF2D_HUMAN	reviewed	Myocyte-specific enhancer factor 2D	MEF2D	Homo sapiens (Human)	521
Q63943	MEF2D_MOUSE	reviewed	Myocyte-specific enhancer factor 2D	Mef2d	Mus musculus (Mouse)	514
O89038	MEF2D_RAT	reviewed	Myocyte-specific enhancer factor 2D	Mef2d	Rattus norvegicus (Rat)	507
O75030	MITF_HUMAN	reviewed	Microphthalmia-associated transcription factor (Class E basic helix-loop-helix protein 32) (bHLHe32)	MITF BHLHE32	Homo sapiens (Human)	526
Q08874	MITF_MOUSE	reviewed	Microphthalmia-associated transcription factor	Mitf Bw Mi Vit	Mus musculus (Mouse)	526
Q55CL6	MP2K1_DICDI	reviewed	Dual specificity mitogen-activated protein kinase kinase 1 (MAP kinase kinase 1) (MAPKK 1) (EC 2.7.12.2) (ERK activator kinase 1) (MAPK/ERK kinase 1) (DdMEK1) (MEK1) (MAPK/ERK kinase A) (MEKA)	mekA MEK1 DDB_G0269152	Dictyostelium discoideum (Slime mold)	660
Q9UBG0	MRC2_HUMAN	reviewed	C-type mannose receptor 2 (C-type lectin domain family 13 member E) (Endocytic receptor 180) (Macrophage mannose receptor 2) (Urokinase-type plasminogen activator receptor-associated protein) (UPAR-associated protein) (Urokinase receptor-associated protein) (CD antigen CD280)	MRC2 CLEC13E ENDO180 KIAA0709 UPARAP	Homo sapiens (Human)	1479
Q64449	MRC2_MOUSE	reviewed	C-type mannose receptor 2 (Lectin lambda) (Macrophage mannose receptor 2) (CD antigen CD280)	Mrc2 Kiaa0709	Mus musculus (Mouse)	1479
Q4TU93	MRC2_RAT	reviewed	C-type mannose receptor 2 (Endocytic receptor 180) (Macrophage mannose receptor 2) (CD antigen CD280)	Mrc2 Endo180	Rattus norvegicus (Rat)	1480
P35719	MRP8_YEAST	reviewed	Uncharacterized protein MRP8	MRP8 YKL142W YKL3	Saccharomyces cerevisiae (strain ATCC 204508 / S288c) (Baker's yeast)	219
O02786	MSX1_BOVIN	reviewed	Homeobox protein MSX-1 (Msh homeobox 1-like protein)	MSX1	Bos taurus (Bovine)	297
Q2VL85	MSX1_CALGO	reviewed	Homeobox protein MSX-1 (Msh homeobox 1-like protein)	MSX1	Callimico goeldii (Goeldi's marmoset)	297
Q2VL84	MSX1_CALJA	reviewed	Homeobox protein MSX-1 (Msh homeobox 1-like protein)	MSX1	Callithrix jacchus (White-tufted-ear marmoset)	297
Q2VL79	MSX1_DAUMA	reviewed	Homeobox protein MSX-1 (Msh homeobox 1-like protein)	MSX1	Daubentonia madagascariensis (Aye-aye) (Sciurus madagascariensis)	297
P28360	MSX1_HUMAN	reviewed	Homeobox protein MSX-1 (Homeobox protein Hox-7) (Msh homeobox 1-like protein)	MSX1 HOX7	Homo sapiens (Human)	297
Q2VL78	MSX1_LEMCA	reviewed	Homeobox protein MSX-1 (Msh homeobox 1-like protein)	MSX1	Lemur catta (Ring-tailed lemur)	297
Q2VL83	MSX1_LEORO	reviewed	Homeobox protein MSX-1 (Msh homeobox 1-like protein)	MSX1	Leontopithecus rosalia (Golden lion tamarin)	297
Q2VL77	MSX1_LEPED	reviewed	Homeobox protein MSX-1 (Msh homeobox 1-like protein)	MSX1	Lepilemur edwardsi (Milne-Edwards's sportive lemur)	297
Q2VL87	MSX1_MACMU	reviewed	Homeobox protein MSX-1 (Msh homeobox 1-like protein)	MSX1	Macaca mulatta (Rhesus macaque)	297
P13297	MSX1_MOUSE	reviewed	Homeobox protein MSX-1 (Homeobox protein Hox-7) (Hox-7.1) (Msh homeobox 1-like protein)	Msx1 Hox7 Hox7.1	Mus musculus (Mouse)	293
Q2VL88	MSX1_PANTR	reviewed	Homeobox protein MSX-1 (Msh homeobox 1-like protein)	MSX1	Pan troglodytes (Chimpanzee)	297
Q2VL80	MSX1_PERPO	reviewed	Homeobox protein MSX-1 (Msh homeobox 1-like protein)	MSX1	Perodicticus potto edwarsi (Potto)	297
Q2VL76	MSX1_PROCO	reviewed	Homeobox protein MSX-1 (Msh homeobox 1-like protein)	MSX1	Propithecus coquereli (Coquerel's sifaka) (Propithecus verreauxi coquereli)	297
Q2VL82	MSX1_SAGOE	reviewed	Homeobox protein MSX-1 (Msh homeobox 1-like protein)	MSX1	Saguinus oedipus (Cotton-top tamarin)	297
Q2VL86	MSX1_SAIBB	reviewed	Homeobox protein MSX-1 (Msh homeobox 1-like protein)	MSX1	Saimiri boliviensis boliviensis (Bolivian squirrel monkey)	297
Q13506	NAB1_HUMAN	reviewed	NGFI-A-binding protein 1 (EGR-1-binding protein 1) (Transcriptional regulatory protein p54)	NAB1	Homo sapiens (Human)	487
O35589	NAB1_MESAU	reviewed	NGFI-A-binding protein 1 (EGR-1-binding protein 1) (Transcriptional repressor TA16)	NAB1	Mesocricetus auratus (Golden hamster)	485
Q61122	NAB1_MOUSE	reviewed	NGFI-A-binding protein 1 (EGR-1-binding protein 1)	Nab1	Mus musculus (Mouse)	486
Q62722	NAB1_RAT	reviewed	NGFI-A-binding protein 1 (EGR-1-binding protein 1)	Nab1	Rattus norvegicus (Rat)	485
Q15742	NAB2_HUMAN	reviewed	NGFI-A-binding protein 2 (EGR-1-binding protein 2) (Melanoma-associated delayed early response protein) (Protein MADER)	NAB2 MADER	Homo sapiens (Human)	525
Q61127	NAB2_MOUSE	reviewed	NGFI-A-binding protein 2 (EGR-1-binding protein 2)	Nab2	Mus musculus (Mouse)	525
Q15788	NCOA1_HUMAN	reviewed	Nuclear receptor coactivator 1 (NCoA-1) (EC 2.3.1.48) (Class E basic helix-loop-helix protein 74) (bHLHe74) (Protein Hin-2) (RIP160) (Renal carcinoma antigen NY-REN-52) (Steroid receptor coactivator 1) (SRC-1)	NCOA1 BHLHE74 SRC1	Homo sapiens (Human)	1441
P70365	NCOA1_MOUSE	reviewed	Nuclear receptor coactivator 1 (NCoA-1) (EC 2.3.1.48) (Nuclear receptor coactivator protein 1) (mNRC-1) (Steroid receptor coactivator 1) (SRC-1)	Ncoa1 Src1	Mus musculus (Mouse)	1447
Q4PJW2	NCOA1_PIG	reviewed	Nuclear receptor coactivator 1 (NCoA-1) (EC 2.3.1.48) (Steroid receptor coactivator 1) (SRC-1)	NCOA1 SRC1	Sus scrofa (Pig)	1440
Q95KU9	NEMO_BOVIN	reviewed	NF-kappa-B essential modulator (NEMO) (IkB kinase-associated protein 1) (IKKAP1) (Inhibitor of nuclear factor kappa-B kinase subunit gamma) (I-kappa-B kinase subunit gamma) (IKK-gamma) (IKKG) (IkB kinase subunit gamma) (NF-kappa-B essential modifier)	IKBKG NEMO	Bos taurus (Bovine)	419
Q9Y6K9	NEMO_HUMAN	reviewed	NF-kappa-B essential modulator (NEMO) (FIP-3) (IkB kinase-associated protein 1) (IKKAP1) (Inhibitor of nuclear factor kappa-B kinase subunit gamma) (I-kappa-B kinase subunit gamma) (IKK-gamma) (IKKG) (IkB kinase subunit gamma) (NF-kappa-B essential modifier)	IKBKG FIP3 NEMO	Homo sapiens (Human)	419
O88522	NEMO_MOUSE	reviewed	NF-kappa-B essential modulator (NEMO) (IkB kinase-associated protein 1) (IKKAP1) (mFIP-3) (Inhibitor of nuclear factor kappa-B kinase subunit gamma) (I-kappa-B kinase subunit gamma) (IKK-gamma) (IKKG) (IkB kinase subunit gamma) (NF-kappa-B essential modifier)	Ikbkg Nemo	Mus musculus (Mouse)	412
Q6TMG5	NEMO_RAT	reviewed	NF-kappa-B essential modulator (NEMO) (IkB kinase-associated protein 1) (IKKAP1) (Inhibitor of nuclear factor kappa-B kinase subunit gamma) (I-kappa-B kinase subunit gamma) (IKK-gamma) (IKKG) (IkB kinase subunit gamma) (NF-kappa-B essential modifier)	Ikbkg Nemo	Rattus norvegicus (Rat)	412
Q5EAD3	NFE2_BOVIN	reviewed	Transcription factor NF-E2 45 kDa subunit (Leucine zipper protein NF-E2) (Nuclear factor, erythroid-derived 2 45 kDa subunit) (p45 NF-E2)	NFE2	Bos taurus (Bovine)	374
Q16621	NFE2_HUMAN	reviewed	Transcription factor NF-E2 45 kDa subunit (Leucine zipper protein NF-E2) (Nuclear factor, erythroid-derived 2 45 kDa subunit) (p45 NF-E2)	NFE2	Homo sapiens (Human)	373
Q07279	NFE2_MOUSE	reviewed	Transcription factor NF-E2 45 kDa subunit (Leucine zipper protein NF-E2) (Nuclear factor, erythroid-derived 2 45 kDa subunit) (p45 NF-E2)	Nfe2	Mus musculus (Mouse)	373
Q6AYT2	NFE2_RAT	reviewed	Transcription factor NF-E2 45 kDa subunit (Leucine zipper protein NF-E2) (Nuclear factor, erythroid-derived 2 45 kDa subunit) (p45 NF-E2)	Nfe2	Rattus norvegicus (Rat)	373
Q5E950	NHP2_BOVIN	reviewed	H/ACA ribonucleoprotein complex subunit 2 (Nucleolar protein family A member 2) (snoRNP protein NHP2)	NHP2 NOLA2	Bos taurus (Bovine)	153
Q9NX24	NHP2_HUMAN	reviewed	H/ACA ribonucleoprotein complex subunit 2 (Nucleolar protein family A member 2) (snoRNP protein NHP2)	NHP2 NOLA2 HSPC286	Homo sapiens (Human)	153
Q9CRB2	NHP2_MOUSE	reviewed	H/ACA ribonucleoprotein complex subunit 2 (Nucleolar protein family A member 2) (snoRNP protein NHP2)	Nhp2 Nola2	Mus musculus (Mouse)	153
Q5RC65	NHP2_PONAB	reviewed	H/ACA ribonucleoprotein complex subunit 2 (Nucleolar protein family A member 2) (snoRNP protein NHP2)	NHP2 NOLA2	Pongo abelii (Sumatran orangutan)	153
A6ZS02	NIS1_YEAS7	reviewed	Protein NIS1 (Jumonji domain interacting protein 1) (Neck protein interacting with septins protein 1)	NIS1 JIP1 SCY_4713	Saccharomyces cerevisiae (strain YJM789) (Baker's yeast)	407
P53939	NIS1_YEAST	reviewed	Protein NIS1 (Jumonji domain-interacting protein 1) (Neck protein interacting with septins protein 1)	NIS1 JIP1 YNL078W N2337	Saccharomyces cerevisiae (strain ATCC 204508 / S288c) (Baker's yeast)	407
Q9Y2X3	NOP58_HUMAN	reviewed	Nucleolar protein 58 (Nucleolar protein 5)	NOP58 NOL5 NOP5 HSPC120	Homo sapiens (Human)	529
Q4R779	NOP58_MACFA	reviewed	Nucleolar protein 58 (Nucleolar protein 5)	NOP58 NOL5 QtsA-15965	Macaca fascicularis (Crab-eating macaque) (Cynomolgus monkey)	530
Q6DFW4	NOP58_MOUSE	reviewed	Nucleolar protein 58 (MSSP) (Nucleolar protein 5) (SIK-similar protein)	Nop58 Nol5	Mus musculus (Mouse)	536
Q9QZ86	NOP58_RAT	reviewed	Nucleolar protein 58 (Nopp140-associated protein of 65 kDa) (Nucleolar protein 5)	Nop58 Nap65 Nol5 Nop5	Rattus norvegicus (Rat)	534
Q3T160	NPM_BOVIN	reviewed	Nucleophosmin (NPM)	NPM1	Bos taurus (Bovine)	294
P06748	NPM_HUMAN	reviewed	Nucleophosmin (NPM) (Nucleolar phosphoprotein B23) (Nucleolar protein NO38) (Numatrin)	NPM1 NPM	Homo sapiens (Human)	294
Q61937	NPM_MOUSE	reviewed	Nucleophosmin (NPM) (Nucleolar phosphoprotein B23) (Nucleolar protein NO38) (Numatrin)	Npm1	Mus musculus (Mouse)	292
P13084	NPM_RAT	reviewed	Nucleophosmin (NPM) (Nucleolar phosphoprotein B23) (Nucleolar protein NO38) (Numatrin)	Npm1	Rattus norvegicus (Rat)	292
A0JNE3	NR2C1_BOVIN	reviewed	Nuclear receptor subfamily 2 group C member 1	NR2C1	Bos taurus (Bovine)	608
P13056	NR2C1_HUMAN	reviewed	Nuclear receptor subfamily 2 group C member 1 (Orphan nuclear receptor TR2) (Testicular receptor 2)	NR2C1 TR2	Homo sapiens (Human)	603
Q95K90	NR2C1_MACFA	reviewed	Nuclear receptor subfamily 2 group C member 1	NR2C1 QmoA-12557	Macaca fascicularis (Crab-eating macaque) (Cynomolgus monkey)	603
Q505F1	NR2C1_MOUSE	reviewed	Nuclear receptor subfamily 2 group C member 1 (Orphan nuclear receptor TR2) (Testicular receptor 2) (mTR2)	Nr2c1 Tr2 Tr2-11	Mus musculus (Mouse)	590
Q5RCZ5	NR2C1_PONAB	reviewed	Nuclear receptor subfamily 2 group C member 1	NR2C1	Pongo abelii (Sumatran orangutan)	601
Q8VIJ4	NR2C1_RAT	reviewed	Nuclear receptor subfamily 2 group C member 1 (Orphan nuclear receptor TR2) (Testicular receptor 2)	Nr2c1 Tr2	Rattus norvegicus (Rat)	590
Q9TTF0	NR2E3_BOVIN	reviewed	Photoreceptor-specific nuclear receptor (Nuclear receptor subfamily 2 group E member 3) (Retina-specific nuclear receptor)	NR2E3	Bos taurus (Bovine)	411
Q9Y5X4	NR2E3_HUMAN	reviewed	Photoreceptor-specific nuclear receptor (Nuclear receptor subfamily 2 group E member 3) (Retina-specific nuclear receptor)	NR2E3 PNR RNR	Homo sapiens (Human)	410
Q9QXZ7	NR2E3_MOUSE	reviewed	Photoreceptor-specific nuclear receptor (Nuclear receptor subfamily 2 group E member 3) (Retina-specific nuclear receptor)	Nr2e3 Pnr Rnr	Mus musculus (Mouse)	395
P54845	NRL_HUMAN	reviewed	Neural retina-specific leucine zipper protein (NRL)	NRL D14S46E	Homo sapiens (Human)	237
P54846	NRL_MOUSE	reviewed	Neural retina-specific leucine zipper protein (NRL)	Nrl	Mus musculus (Mouse)	237
Q8GYH7	NSE2_ARATH	reviewed	E3 SUMO-protein ligase MMS21 (EC 6.3.2.-) (MMS21 homolog) (AtMMS21) (Protein HIGH PLOIDY 2)	MMS21 HPY2 At3g15150 F4B12.6	Arabidopsis thaliana (Mouse-ear cress)	249
Q32KY9	NSE2_BOVIN	reviewed	E3 SUMO-protein ligase NSE2 (EC 6.3.2.-) (Non-structural maintenance of chromosomes element 2 homolog) (Non-SMC element 2 homolog)	NSMCE2 MMS21	Bos taurus (Bovine)	248
Q96MF7	NSE2_HUMAN	reviewed	E3 SUMO-protein ligase NSE2 (EC 6.3.2.-) (MMS21 homolog) (hMMS21) (Non-structural maintenance of chromosomes element 2 homolog) (Non-SMC element 2 homolog)	NSMCE2 C8orf36 MMS21	Homo sapiens (Human)	247
Q91VT1	NSE2_MOUSE	reviewed	E3 SUMO-protein ligase NSE2 (EC 6.3.2.-) (MMS21 homolog) (Non-structural maintenance of chromosomes element 2 homolog) (Non-SMC element 2 homolog)	Nsmce2 Mms21	Mus musculus (Mouse)	247
Q4V8A0	NSE2_RAT	reviewed	E3 SUMO-protein ligase NSE2 (EC 6.3.2.-) (MMS21 homolog) (Non-structural maintenance of chromosomes element 2 homolog) (Non-SMC element 2 homolog)	Nsmce2 Mms21	Rattus norvegicus (Rat)	247
Q4PIR3	NSE2_SCHPO	reviewed	E3 SUMO-protein ligase nse2 (EC 6.3.2.-) (Non-structural maintenance of chromosomes element 2) (Non-SMC element 2)	nse2 pli2 SPAC16A10.06c	Schizosaccharomyces pombe (strain 972 / ATCC 24843) (Fission yeast)	267
Q7ZXH2	NSE2_XENLA	reviewed	E3 SUMO-protein ligase NSE2 (EC 6.3.2.-) (MMS21 homolog) (Non-structural maintenance of chromosomes element 2 homolog) (Non-SMC element 2 homolog)	nsmce2 mms21	Xenopus laevis (African clawed frog)	238
P38632	NSE2_YEAST	reviewed	E3 SUMO-protein ligase MMS21 (EC 6.3.2.-) (Methyl methanesulfonate-sensitivity protein 21) (Non-structural maintenance of chromosome element 2) (Non-SMC element 2)	MMS21 NSE2 YEL019C	Saccharomyces cerevisiae (strain ATCC 204508 / S288c) (Baker's yeast)	267
Q28151	OZF_BOVIN	reviewed	Zinc finger protein OZF (Only zinc finger protein) (Zinc finger protein 146)	ZNF146 OZF	Bos taurus (Bovine)	292
Q15072	OZF_HUMAN	reviewed	Zinc finger protein OZF (Only zinc finger protein) (Zinc finger protein 146)	ZNF146 OZF	Homo sapiens (Human)	292
Q8BQN6	OZF_MOUSE	reviewed	Zinc finger protein OZF (Only zinc finger protein) (Zinc finger protein 146)	Znf146 Ozf Zfp146	Mus musculus (Mouse)	292
Q5RFP4	OZF_PONAB	reviewed	Zinc finger protein OZF (Only zinc finger protein) (Zinc finger protein 146)	ZNF146 OZF	Pongo abelii (Sumatran orangutan)	292
P67938	P53_BOSIN	reviewed	Cellular tumor antigen p53 (Tumor suppressor p53)	TP53	Bos indicus (Zebu)	386
P67939	P53_BOVIN	reviewed	Cellular tumor antigen p53 (Tumor suppressor p53)	TP53	Bos taurus (Bovine)	386
Q29537	P53_CANFA	reviewed	Cellular tumor antigen p53 (Tumor suppressor p53)	TP53 P53	Canis familiaris (Dog) (Canis lupus familiaris)	381
Q9WUR6	P53_CAVPO	reviewed	Cellular tumor antigen p53 (Tumor suppressor p53)	TP53	Cavia porcellus (Guinea pig)	391
P13481	P53_CHLAE	reviewed	Cellular tumor antigen p53 (Tumor suppressor p53)	TP53	Chlorocebus aethiops (Green monkey) (Cercopithecus aethiops)	393
O09185	P53_CRIGR	reviewed	Cellular tumor antigen p53 (Tumor suppressor p53)	TP53 P53	Cricetulus griseus (Chinese hamster) (Cricetulus barabensis griseus)	393
Q8SPZ3	P53_DELLE	reviewed	Cellular tumor antigen p53 (Tumor suppressor p53)	TP53 P53	Delphinapterus leucas (Beluga whale)	387
P41685	P53_FELCA	reviewed	Cellular tumor antigen p53 (Tumor suppressor p53)	TP53 TRP53	Felis catus (Cat) (Felis silvestris catus)	386
P04637	P53_HUMAN	reviewed	Cellular tumor antigen p53 (Antigen NY-CO-13) (Phosphoprotein p53) (Tumor suppressor p53)	TP53 P53	Homo sapiens (Human)	393
P56423	P53_MACFA	reviewed	Cellular tumor antigen p53 (Tumor suppressor p53)	TP53 P53	Macaca fascicularis (Crab-eating macaque) (Cynomolgus monkey)	393
P61260	P53_MACFU	reviewed	Cellular tumor antigen p53 (Tumor suppressor p53)	TP53 P53	Macaca fuscata fuscata (Japanese macaque)	393
P56424	P53_MACMU	reviewed	Cellular tumor antigen p53 (Tumor suppressor p53)	TP53 P53	Macaca mulatta (Rhesus macaque)	393
O36006	P53_MARMO	reviewed	Cellular tumor antigen p53 (Tumor suppressor p53)	TP53	Marmota monax (Woodchuck)	391
Q00366	P53_MESAU	reviewed	Cellular tumor antigen p53 (Tumor suppressor p53)	TP53	Mesocricetus auratus (Golden hamster)	396
P02340	P53_MOUSE	reviewed	Cellular tumor antigen p53 (Tumor suppressor p53)	Tp53 P53 Trp53	Mus musculus (Mouse)	387
Q9TUB2	P53_PIG	reviewed	Cellular tumor antigen p53 (Tumor suppressor p53)	TP53 P53	Sus scrofa (Pig)	386
Q95330	P53_RABIT	reviewed	Cellular tumor antigen p53 (Tumor suppressor p53)	TP53	Oryctolagus cuniculus (Rabbit)	391
P10361	P53_RAT	reviewed	Cellular tumor antigen p53 (Tumor suppressor p53)	Tp53 P53	Rattus norvegicus (Rat)	391
P51664	P53_SHEEP	reviewed	Cellular tumor antigen p53 (Tumor suppressor p53)	TP53	Ovis aries (Sheep)	382
Q9TTA1	P53_TUPBE	reviewed	Cellular tumor antigen p53 (Tumor suppressor p53)	TP53 P53	Tupaia belangeri (Common tree shrew) (Tupaia glis belangeri)	393
Q9H3D4	P63_HUMAN	reviewed	Tumor protein 63 (p63) (Chronic ulcerative stomatitis protein) (CUSP) (Keratinocyte transcription factor KET) (Transformation-related protein 63) (TP63) (Tumor protein p73-like) (p73L) (p40) (p51)	TP63 KET P63 P73H P73L TP73L	Homo sapiens (Human)	680
O88898	P63_MOUSE	reviewed	Tumor protein 63 (p63) (Transformation-related protein 63) (TP63) (Tumor protein p73-like) (p73L)	Tp63 P63 P73l Tp73l Trp63	Mus musculus (Mouse)	680
Q9JJP6	P63_RAT	reviewed	Tumor protein 63 (p63) (Keratinocyte transcription factor KET) (Transformation-related protein 63) (TP63) (Tumor protein p73-like) (p73L)	Tp63 Ket P63 Tp73l Trp63	Rattus norvegicus (Rat)	680
Q9XSK8	P73_CHLAE	reviewed	Tumor protein p73 (p53-like transcription factor) (p53-related protein)	TP73 P73	Chlorocebus aethiops (Green monkey) (Cercopithecus aethiops)	637
O15350	P73_HUMAN	reviewed	Tumor protein p73 (p53-like transcription factor) (p53-related protein)	TP73 P73	Homo sapiens (Human)	636
Q9JJP2	P73_MOUSE	reviewed	Tumor protein p73 (p53-like transcription factor) (p53-related protein)	Tp73 P73 Trp73	Mus musculus (Mouse)	631
P25500	PAPOA_BOVIN	reviewed	Poly(A) polymerase alpha (PAP-alpha) (EC 2.7.7.19) (Polynucleotide adenylyltransferase alpha)	PAPOLA PAP	Bos taurus (Bovine)	739
P51003	PAPOA_HUMAN	reviewed	Poly(A) polymerase alpha (PAP-alpha) (EC 2.7.7.19) (Polynucleotide adenylyltransferase alpha)	PAPOLA PAP	Homo sapiens (Human)	745
Q61183	PAPOA_MOUSE	reviewed	Poly(A) polymerase alpha (PAP-alpha) (EC 2.7.7.19) (Polynucleotide adenylyltransferase)	Papola Pap Plap	Mus musculus (Mouse)	739
Q5E946	PARK7_BOVIN	reviewed	Protein DJ-1 (EC 3.4.-.-) (Parkinson disease protein 7 homolog)	PARK7	Bos taurus (Bovine)	189
Q8UW59	PARK7_CHICK	reviewed	Protein DJ-1 (EC 3.4.-.-) (Parkinson disease protein 7 homolog)	PARK7	Gallus gallus (Chicken)	189
Q95LI9	PARK7_CHLAE	reviewed	Protein DJ-1 (EC 3.4.-.-) (Parkinson disease protein 7 homolog)	PARK7	Chlorocebus aethiops (Green monkey) (Cercopithecus aethiops)	189
Q5XJ36	PARK7_DANRE	reviewed	Protein DJ-1 (zDJ-1) (EC 3.4.-.-) (Parkinson disease protein 7 homolog)	park7 dj1 zgc:103725	Danio rerio (Zebrafish) (Brachydanio rerio)	189
Q99497	PARK7_HUMAN	reviewed	Protein DJ-1 (EC 3.4.-.-) (Oncogene DJ1) (Parkinson disease protein 7)	PARK7	Homo sapiens (Human)	189
Q7TQ35	PARK7_MESAU	reviewed	Protein DJ-1 (EC 3.4.-.-) (Contraception-associated protein 1) (Parkinson disease protein 7 homolog)	PARK7 CAP1	Mesocricetus auratus (Golden hamster)	189
Q99LX0	PARK7_MOUSE	reviewed	Protein DJ-1 (EC 3.4.-.-) (Parkinson disease protein 7 homolog)	Park7	Mus musculus (Mouse)	189
O88767	PARK7_RAT	reviewed	Protein DJ-1 (EC 3.4.-.-) (Contraception-associated protein 1) (Protein CAP1) (Fertility protein SP22) (Parkinson disease protein 7 homolog)	Park7 Cap1	Rattus norvegicus (Rat)	189
P15873	PCNA_YEAST	reviewed	Proliferating cell nuclear antigen (PCNA)	POL30 YBR088C YBR0811	Saccharomyces cerevisiae (strain ATCC 204508 / S288c) (Baker's yeast)	258
P27815	PDE4A_HUMAN	reviewed	cAMP-specific 3',5'-cyclic phosphodiesterase 4A (EC 3.1.4.17) (DPDE2) (PDE46)	PDE4A DPDE2	Homo sapiens (Human)	886
O89084	PDE4A_MOUSE	reviewed	cAMP-specific 3',5'-cyclic phosphodiesterase 4A (EC 3.1.4.17)	Pde4a	Mus musculus (Mouse)	844
P54748	PDE4A_RAT	reviewed	cAMP-specific 3',5'-cyclic phosphodiesterase 4A (EC 3.1.4.17) (DPDE2)	Pde4a	Rattus norvegicus (Rat)	844
Q08499	PDE4D_HUMAN	reviewed	cAMP-specific 3',5'-cyclic phosphodiesterase 4D (EC 3.1.4.17) (DPDE3) (PDE43)	PDE4D DPDE3	Homo sapiens (Human)	809
Q01063	PDE4D_MOUSE	reviewed	cAMP-specific 3',5'-cyclic phosphodiesterase 4D (EC 3.1.4.17) (DPDE3)	Pde4d	Mus musculus (Mouse)	747
P14270	PDE4D_RAT	reviewed	cAMP-specific 3',5'-cyclic phosphodiesterase 4D (EC 3.1.4.17) (DPDE3)	Pde4d	Rattus norvegicus (Rat)	803
O75925	PIAS1_HUMAN	reviewed	E3 SUMO-protein ligase PIAS1 (EC 6.3.2.-) (DEAD/H box-binding protein 1) (Gu-binding protein) (GBP) (Protein inhibitor of activated STAT protein 1) (RNA helicase II-binding protein)	PIAS1 DDXBP1	Homo sapiens (Human)	651
O88907	PIAS1_MOUSE	reviewed	E3 SUMO-protein ligase PIAS1 (EC 6.3.2.-) (DEAD/H box-binding protein 1) (Protein inhibitor of activated STAT protein 1)	Pias1 Ddxbp1	Mus musculus (Mouse)	651
O75928	PIAS2_HUMAN	reviewed	E3 SUMO-protein ligase PIAS2 (EC 6.3.2.-) (Androgen receptor-interacting protein 3) (ARIP3) (DAB2-interacting protein) (DIP) (Msx-interacting zinc finger protein) (Miz1) (PIAS-NY protein) (Protein inhibitor of activated STAT x) (Protein inhibitor of activated STAT2)	PIAS2 PIASX	Homo sapiens (Human)	621
Q8C5D8	PIAS2_MOUSE	reviewed	E3 SUMO-protein ligase PIAS2 (EC 6.3.2.-) (Androgen receptor-interacting protein 3) (ARIP3) (DAB2-interacting protein) (DIP) (Msx-interacting zinc finger protein) (Protein inhibitor of activated STAT x) (Protein inhibitor of activated STAT2)	Pias2 Miz1 Piasx	Mus musculus (Mouse)	621
Q6AZ28	PIAS2_RAT	reviewed	E3 SUMO-protein ligase PIAS2 (EC 6.3.2.-) (Androgen receptor-interacting protein 3) (ARIP3) (DAB2-interacting protein) (DIP) (Msx-interacting-zinc finger protein) (Protein inhibitor of activated STAT x) (Protein inhibitor of activated STAT2)	Pias2 Miz1 Piasx	Rattus norvegicus (Rat)	572
Q9Y6X2	PIAS3_HUMAN	reviewed	E3 SUMO-protein ligase PIAS3 (EC 6.3.2.-) (Protein inhibitor of activated STAT protein 3)	PIAS3	Homo sapiens (Human)	628
O54714	PIAS3_MOUSE	reviewed	E3 SUMO-protein ligase PIAS3 (EC 6.3.2.-) (Protein inhibitor of activated STAT protein 3)	Pias3	Mus musculus (Mouse)	628
O70260	PIAS3_RAT	reviewed	E3 SUMO-protein ligase PIAS3 (EC 6.3.2.-) (KChAP) (Potassium channel-associated protein) (Protein inhibitor of activated STAT protein 3)	Pias3	Rattus norvegicus (Rat)	628
Q8N2W9	PIAS4_HUMAN	reviewed	E3 SUMO-protein ligase PIAS4 (EC 6.3.2.-) (PIASy) (Protein inhibitor of activated STAT protein 4) (Protein inhibitor of activated STAT protein gamma) (PIAS-gamma)	PIAS4 PIASG	Homo sapiens (Human)	510
Q9JM05	PIAS4_MOUSE	reviewed	E3 SUMO-protein ligase PIAS4 (EC 6.3.2.-) (PIASy) (Protein inhibitor of activated STAT protein 4) (Protein inhibitor of activated STAT protein gamma) (PIAS-gamma)	Pias4 Piasg	Mus musculus (Mouse)	507
Q6DJT9	PLAG1_HUMAN	reviewed	Zinc finger protein PLAG1 (Pleiomorphic adenoma gene 1 protein)	PLAG1	Homo sapiens (Human)	500
Q9QYE0	PLAG1_MOUSE	reviewed	Zinc finger protein PLAG1 (Pleiomorphic adenoma gene 1 protein)	Plag1	Mus musculus (Mouse)	499
Q5U2T6	PLAG1_RAT	reviewed	Zinc finger protein PLAG1 (Pleiomorphic adenoma gene 1 protein)	Plag1	Rattus norvegicus (Rat)	499
O94451	PLI1_SCHPO	reviewed	E3 SUMO-protein ligase pli1 (EC 6.-.-.-)	pli1 SPAC1687.05	Schizosaccharomyces pombe (strain 972 / ATCC 24843) (Fission yeast)	727
P29590	PML_HUMAN	reviewed	Protein PML (Promyelocytic leukemia protein) (RING finger protein 71) (Tripartite motif-containing protein 19)	PML MYL RNF71 TRIM19	Homo sapiens (Human)	882
Q60953	PML_MOUSE	reviewed	Protein PML	Pml	Mus musculus (Mouse)	885
O97552	PO5F1_BOVIN	reviewed	POU domain, class 5, transcription factor 1 (Octamer-binding protein 3) (Oct-3) (Octamer-binding transcription factor 3) (OTF-3)	POU5F1 OCT3	Bos taurus (Bovine)	360
Q01860	PO5F1_HUMAN	reviewed	POU domain, class 5, transcription factor 1 (Octamer-binding protein 3) (Oct-3) (Octamer-binding protein 4) (Oct-4) (Octamer-binding transcription factor 3) (OTF-3)	POU5F1 OCT3 OCT4 OTF3	Homo sapiens (Human)	360
Q5TM49	PO5F1_MACMU	reviewed	POU domain, class 5, transcription factor 1 (Octamer-binding protein 3) (Oct-3) (Octamer-binding protein 4) (Oct-4) (Octamer-binding transcription factor 3) (OTF-3)	POU5F1 OCT3 OCT4	Macaca mulatta (Rhesus macaque)	360
P20263	PO5F1_MOUSE	reviewed	POU domain, class 5, transcription factor 1 (NF-A3) (Octamer-binding protein 3) (Oct-3) (Octamer-binding protein 4) (Oct-4) (Octamer-binding transcription factor 3) (OTF-3)	Pou5f1 Oct-3 Oct-4 Otf-3 Otf3	Mus musculus (Mouse)	352
Q7YR49	PO5F1_PANTR	reviewed	POU domain, class 5, transcription factor 1 (Octamer-binding protein 3) (Oct-3) (Octamer-binding transcription factor 3) (OTF-3)	POU5F1 OCT3 OTF3	Pan troglodytes (Chimpanzee)	360
Q9TSV5	PO5F1_PIG	reviewed	POU domain, class 5, transcription factor 1 (Octamer-binding protein 3) (Oct-3) (Octamer-binding protein 4) (Oct-4) (Octamer-binding transcription factor 3) (OTF-3)	POU5F1 OCT3 OCT4	Sus scrofa (Pig)	360
A7XW25	PRGR_ATEPA	reviewed	Progesterone receptor (PR) (Nuclear receptor subfamily 3 group C member 3)	PGR NR3C3	Ateles paniscus (Black spider monkey)	935
Q9GLW0	PRGR_CANFA	reviewed	Progesterone receptor (PR) (Nuclear receptor subfamily 3 group C member 3)	PGR NR3C3	Canis familiaris (Dog) (Canis lupus familiaris)	939
A7XW16	PRGR_CEBAP	reviewed	Progesterone receptor (PR) (Nuclear receptor subfamily 3 group C member 3)	PGR NR3C3	Cebus apella (Brown-capped capuchin)	935
P07812	PRGR_CHICK	reviewed	Progesterone receptor (PR) (Nuclear receptor subfamily 3 group C member 3)	PGR NR3C3	Gallus gallus (Chicken)	786
A7X8C9	PRGR_CHLAE	reviewed	Progesterone receptor (PR) (Nuclear receptor subfamily 3 group C member 3)	PGR NR3C3	Chlorocebus aethiops (Green monkey) (Cercopithecus aethiops)	933
A7X8D2	PRGR_COLGU	reviewed	Progesterone receptor (PR) (Nuclear receptor subfamily 3 group C member 3)	PGR NR3C3	Colobus guereza (Black-and-white colobus monkey)	934
A7X8B7	PRGR_GORGO	reviewed	Progesterone receptor (PR) (Nuclear receptor subfamily 3 group C member 3)	PGR NR3C3	Gorilla gorilla gorilla (Lowland gorilla)	933
P06401	PRGR_HUMAN	reviewed	Progesterone receptor (PR) (Nuclear receptor subfamily 3 group C member 3)	PGR NR3C3	Homo sapiens (Human)	933
A7X8C2	PRGR_HYLLA	reviewed	Progesterone receptor (PR) (Nuclear receptor subfamily 3 group C member 3)	PGR NR3C3	Hylobates lar (Common gibbon)	932
A7X8C4	PRGR_MACSY	reviewed	Progesterone receptor (PR) (Nuclear receptor subfamily 3 group C member 3)	PGR NR3C3	Macaca sylvanus (Barbary macaque)	935
Q00175	PRGR_MOUSE	reviewed	Progesterone receptor (PR) (Nuclear receptor subfamily 3 group C member 3)	Pgr Nr3c3 Pr	Mus musculus (Mouse)	923
A7X8B5	PRGR_PANPA	reviewed	Progesterone receptor (PR) (Nuclear receptor subfamily 3 group C member 3)	PGR NR3C3	Pan paniscus (Pygmy chimpanzee) (Bonobo)	933
A7X8B3	PRGR_PANTR	reviewed	Progesterone receptor (PR) (Nuclear receptor subfamily 3 group C member 3)	PGR NR3C3	Pan troglodytes (Chimpanzee)	933
A7X8C7	PRGR_PAPAN	reviewed	Progesterone receptor (PR) (Nuclear receptor subfamily 3 group C member 3)	PGR NR3C3	Papio anubis (Olive baboon)	933
A7XW20	PRGR_PITIR	reviewed	Progesterone receptor (PR) (Nuclear receptor subfamily 3 group C member 3)	PGR NR3C3	Pithecia irrorata (Gray monk saki)	935
A7X8B9	PRGR_PONPY	reviewed	Progesterone receptor (PR) (Nuclear receptor subfamily 3 group C member 3)	PGR NR3C3	Pongo pygmaeus (Bornean orangutan)	935
P06186	PRGR_RABIT	reviewed	Progesterone receptor (PR) (Nuclear receptor subfamily 3 group C member 3)	PGR NR3C3	Oryctolagus cuniculus (Rabbit)	930
Q63449	PRGR_RAT	reviewed	Progesterone receptor (PR) (Nuclear receptor subfamily 3 group C member 3)	Pgr Nr3c3	Rattus norvegicus (Rat)	923
A7X8D4	PRGR_TRAOB	reviewed	Progesterone receptor (PR) (Nuclear receptor subfamily 3 group C member 3)	PGR NR3C3	Trachypithecus obscurus (Dusky leaf-monkey) (Presbytis obscura)	933
P46060	RAGP1_HUMAN	reviewed	Ran GTPase-activating protein 1 (RanGAP1)	RANGAP1 KIAA1835 SD	Homo sapiens (Human)	587
P46061	RAGP1_MOUSE	reviewed	Ran GTPase-activating protein 1 (RanGAP1)	Rangap1 Fug1	Mus musculus (Mouse)	589
Q5FBR4	RARA_CANFA	reviewed	Retinoic acid receptor alpha (RAR-alpha) (Nuclear receptor subfamily 1 group B member 1)	RARA NR1B1	Canis familiaris (Dog) (Canis lupus familiaris)	462
P10276	RARA_HUMAN	reviewed	Retinoic acid receptor alpha (RAR-alpha) (Nuclear receptor subfamily 1 group B member 1)	RARA NR1B1	Homo sapiens (Human)	462
P11416	RARA_MOUSE	reviewed	Retinoic acid receptor alpha (RAR-alpha) (Nuclear receptor subfamily 1 group B member 1)	Rara Nr1b1	Mus musculus (Mouse)	462
P48820	RBP2_BOVIN	reviewed	E3 SUMO-protein ligase RanBP2 (358 kDa nucleoporin) (Nuclear pore complex protein Nup358) (Nucleoporin Nup358) (Ran-binding protein 2) (RanBP2) (p270) [Includes: Putative peptidyl-prolyl cis-trans isomerase (PPIase) (EC 5.2.1.8) (Rotamase)] (Fragment)	RANBP2	Bos taurus (Bovine)	1085
P49792	RBP2_HUMAN	reviewed	E3 SUMO-protein ligase RanBP2 (358 kDa nucleoporin) (Nuclear pore complex protein Nup358) (Nucleoporin Nup358) (Ran-binding protein 2) (RanBP2) (p270) [Includes: Putative peptidyl-prolyl cis-trans isomerase (PPIase) (EC 5.2.1.8) (Rotamase)]	RANBP2 NUP358	Homo sapiens (Human)	3224
Q9ERU9	RBP2_MOUSE	reviewed	E3 SUMO-protein ligase RanBP2 (Ran-binding protein 2) (RanBP2) [Includes: Putative peptidyl-prolyl cis-trans isomerase (PPIase) (EC 5.2.1.8) (Rotamase)]	Ranbp2	Mus musculus (Mouse)	3053
P21538	REB1_YEAST	reviewed	DNA-binding protein REB1 (QBP)	REB1 GRF2 YBR049C YBR0502	Saccharomyces cerevisiae (strain ATCC 204508 / S288c) (Baker's yeast)	810
P27694	RFA1_HUMAN	reviewed	Replication protein A 70 kDa DNA-binding subunit (RP-A p70) (Replication factor A protein 1) (RF-A protein 1) (Single-stranded DNA-binding protein)	RPA1 REPA1 RPA70	Homo sapiens (Human)	616
Q8VEE4	RFA1_MOUSE	reviewed	Replication protein A 70 kDa DNA-binding subunit (RP-A p70) (Replication factor A protein 1) (RF-A protein 1)	Rpa1	Mus musculus (Mouse)	623
Q5R7Q4	RFA1_PONAB	reviewed	Replication protein A 70 kDa DNA-binding subunit (RP-A p70) (Replication factor A protein 1) (RF-A protein 1)	RPA1	Pongo abelii (Sumatran orangutan)	616
Q06624	RHC31_YEAST	reviewed	DNA damage tolerance protein RHC31 (RAD31 homolog)	AOS1 RHC31 YPR180W P9705.5	Saccharomyces cerevisiae (strain ATCC 204508 / S288c) (Baker's yeast)	347
Q86UA6	RIP_HUMAN	reviewed	RPA-interacting protein (hRIP)	RPAIN RIP	Homo sapiens (Human)	219
P04456	RL25_YEAST	reviewed	60S ribosomal protein L25 (RP16L) (YL25) (YP42')	RPL25 YOL127W	Saccharomyces cerevisiae (strain ATCC 204508 / S288c) (Baker's yeast)	142
P78317	RNF4_HUMAN	reviewed	E3 ubiquitin ligase RNF4 (EC 6.3.2.-) (RING finger protein 4) (Small nuclear ring finger protein) (Protein SNURF)	RNF4 SNURF RES4-26	Homo sapiens (Human)	190
Q9QZS2	RNF4_MOUSE	reviewed	E3 ubiquitin ligase RNF4 (EC 6.3.2.-) (RING finger protein 4)	Rnf4	Mus musculus (Mouse)	194
O88846	RNF4_RAT	reviewed	E3 ubiquitin ligase RNF4 (EC 6.3.2.-) (RING finger protein 4) (Small nuclear ring finger protein) (Protein SNURF)	Rnf4 Snurf	Rattus norvegicus (Rat)	194
P09867	ROA1_BOVIN	reviewed	Heterogeneous nuclear ribonucleoprotein A1 (hnRNP A1) (Helix-destabilizing protein) (Single-strand RNA-binding protein) (Unwinding protein 1) (UP1) (hnRNP core protein A1)	HNRNPA1 HNRPA1	Bos taurus (Bovine)	320
P09651	ROA1_HUMAN	reviewed	Heterogeneous nuclear ribonucleoprotein A1 (hnRNP A1) (Helix-destabilizing protein) (Single-strand RNA-binding protein) (hnRNP core protein A1)	HNRNPA1 HNRPA1	Homo sapiens (Human)	372
Q28521	ROA1_MACMU	reviewed	Heterogeneous nuclear ribonucleoprotein A1 (hnRNP A1) (Helix-destabilizing protein) (Single-strand-binding protein) (hnRNP core protein A1)	HNRNPA1 HNRPA1	Macaca mulatta (Rhesus macaque)	320
P49312	ROA1_MOUSE	reviewed	Heterogeneous nuclear ribonucleoprotein A1 (hnRNP A1) (HDP-1) (Helix-destabilizing protein) (Single-strand-binding protein) (Topoisomerase-inhibitor suppressed) (hnRNP core protein A1)	Hnrnpa1 Fli-2 Hnrpa1 Tis	Mus musculus (Mouse)	320
A5A6H4	ROA1_PANTR	reviewed	Heterogeneous nuclear ribonucleoprotein A1 (hnRNP A1) (Helix-destabilizing protein) (Single-strand-binding protein) (hnRNP core protein A1)	HNRNPA1 HNRPA1	Pan troglodytes (Chimpanzee)	320
P04256	ROA1_RAT	reviewed	Heterogeneous nuclear ribonucleoprotein A1 (hnRNP A1) (Helix-destabilizing protein) (HDP) (Single-strand RNA-binding protein) (hnRNP core protein A1)	Hnrnpa1 Hnrpa1	Rattus norvegicus (Rat)	320
P35398	RORA_HUMAN	reviewed	Nuclear receptor ROR-alpha (Nuclear receptor RZR-alpha) (Nuclear receptor subfamily 1 group F member 1) (Retinoid-related orphan receptor-alpha)	RORA NR1F1 RZRA	Homo sapiens (Human)	556
P51448	RORA_MOUSE	reviewed	Nuclear receptor ROR-alpha (Nuclear receptor RZR-alpha) (Nuclear receptor subfamily 1 group F member 1) (Retinoid-related orphan receptor-alpha)	Rora Nr1f1 Rzra	Mus musculus (Mouse)	523
P19793	RXRA_HUMAN	reviewed	Retinoic acid receptor RXR-alpha (Nuclear receptor subfamily 2 group B member 1) (Retinoid X receptor alpha)	RXRA NR2B1	Homo sapiens (Human)	462
P28700	RXRA_MOUSE	reviewed	Retinoic acid receptor RXR-alpha (Nuclear receptor subfamily 2 group B member 1) (Retinoid X receptor alpha)	Rxra Nr2b1	Mus musculus (Mouse)	467
Q05343	RXRA_RAT	reviewed	Retinoic acid receptor RXR-alpha (Nuclear receptor subfamily 2 group B member 1) (Retinoid X receptor alpha)	Rxra Nr2b1	Rattus norvegicus (Rat)	467
P51128	RXRA_XENLA	reviewed	Retinoic acid receptor RXR-alpha (Nuclear receptor subfamily 2 group B member 1) (Retinoid X receptor alpha)	rxra nr2b1	Xenopus laevis (African clawed frog)	488
Q8VY78	SAE1A_ARATH	reviewed	SUMO-activating enzyme subunit 1A (SUMO-activating enzyme subunit 1-1) (Ubiquitin-like 1-activating enzyme E1A)	SAE1A SAE1-1 At4g24940 F13M23.80	Arabidopsis thaliana (Mouse-ear cress)	322
Q9LUF3	SAE1B_ARATH	reviewed	SUMO-activating enzyme subunit 1B (SUMO-activating enzyme subunit 1-2) (Ubiquitin-like 1-activating enzyme E1A)	SAE1B SAE1-2 At5g50580 MBA10.22; At5g50680 MFB16.15	Arabidopsis thaliana (Mouse-ear cress)	320
A2VE14	SAE1_BOVIN	reviewed	SUMO-activating enzyme subunit 1 (Ubiquitin-like 1-activating enzyme E1A)	SAE1	Bos taurus (Bovine)	346
Q17820	SAE1_CAEEL	reviewed	SUMO-activating enzyme subunit aos-1	aos-1 C08B6.9	Caenorhabditis elegans	343
Q6IQS6	SAE1_DANRE	reviewed	SUMO-activating enzyme subunit 1 (Ubiquitin-like 1-activating enzyme E1A)	sae1 sae2a uble1a zgc:86633	Danio rerio (Zebrafish) (Brachydanio rerio)	348
Q54WI4	SAE1_DICDI	reviewed	SUMO-activating enzyme subunit 1 (Ubiquitin-like 1-activating enzyme E1A)	sae1 uble1a DDB_G0279641	Dictyostelium discoideum (Slime mold)	330
Q9UBE0	SAE1_HUMAN	reviewed	SUMO-activating enzyme subunit 1 (Ubiquitin-like 1-activating enzyme E1A)	SAE1 AOS1 SUA1 UBLE1A	Homo sapiens (Human)	346
Q9R1T2	SAE1_MOUSE	reviewed	SUMO-activating enzyme subunit 1 (Ubiquitin-like 1-activating enzyme E1A)	Sae1 Aos1 Sua1 Ubl1a1 Uble1a	Mus musculus (Mouse)	350
Q5NVN7	SAE1_PONAB	reviewed	SUMO-activating enzyme subunit 1 (Ubiquitin-like 1-activating enzyme E1A)	SAE1 UBLE1A	Pongo abelii (Sumatran orangutan)	346
Q6AXQ0	SAE1_RAT	reviewed	SUMO-activating enzyme subunit 1 (Ubiquitin-like 1-activating enzyme E1A)	Sae1 Uble1a	Rattus norvegicus (Rat)	349
Q8JGT5	SAE1_XENLA	reviewed	SUMO-activating enzyme subunit 1 (SUMO-activating enzyme E1 N subunit) (Ubiquitin-like 1-activating enzyme E1A)	sae1 uble1a	Xenopus laevis (African clawed frog)	344
Q28DS0	SAE1_XENTR	reviewed	SUMO-activating enzyme subunit 1 (Ubiquitin-like 1-activating enzyme E1A)	sae1 uble1a TGas081c19.1	Xenopus tropicalis (Western clawed frog) (Silurana tropicalis)	347
Q642Q1	SAE2A_XENLA	reviewed	SUMO-activating enzyme subunit 2-A (EC 6.3.2.-) (Ubiquitin-like 1-activating enzyme E1B-A)	uba2-a sae2-a uble1b-a	Xenopus laevis (African clawed frog)	641
Q7ZY60	SAE2B_XENLA	reviewed	SUMO-activating enzyme subunit 2-B (EC 6.3.2.-) (Ubiquitin-like 1-activating enzyme E1B-B)	uba2-b sae2-b uble1b-b	Xenopus laevis (African clawed frog)	641
Q9SJT1	SAE2_ARATH	reviewed	SUMO-activating enzyme subunit 2 (EC 6.3.2.-) (Protein EMBRYO DEFECTIVE 2764) (Ubiquitin-like 1-activating enzyme E1B)	SAE2 EMB2764 At2g21470 F3K23.23	Arabidopsis thaliana (Mouse-ear cress)	700
Q9NAN1	SAE2_CAEEL	reviewed	SUMO-activating enzyme subunit uba-2 (EC 6.3.2.-)	uba-2 W02A11.4	Caenorhabditis elegans	582
Q7SXG4	SAE2_DANRE	reviewed	SUMO-activating enzyme subunit 2 (EC 6.3.2.-) (Ubiquitin-like 1-activating enzyme E1B)	uba2 sae2 sae2b uble1b si:ch211-149o7.1 zgc:66354	Danio rerio (Zebrafish) (Brachydanio rerio)	650
Q54L40	SAE2_DICDI	reviewed	SUMO-activating enzyme subunit 2 (EC 6.3.2.-) (Ubiquitin-like 1-activating enzyme E1B)	uba2 sae2 DDB_G0286919	Dictyostelium discoideum (Slime mold)	661
Q9UBT2	SAE2_HUMAN	reviewed	SUMO-activating enzyme subunit 2 (EC 6.3.2.-) (Anthracycline-associated resistance ARX) (Ubiquitin-like 1-activating enzyme E1B)	UBA2 SAE2 UBLE1B HRIHFB2115	Homo sapiens (Human)	640
Q9Z1F9	SAE2_MOUSE	reviewed	SUMO-activating enzyme subunit 2 (EC 6.3.2.-) (Anthracycline-associated resistance ARX) (Ubiquitin-like 1-activating enzyme E1B)	Uba2 Sae2 Uble1b	Mus musculus (Mouse)	638
Q28GH3	SAE2_XENTR	reviewed	SUMO-activating enzyme subunit 2 (EC 6.3.2.-) (Ubiquitin-like 1-activating enzyme E1B)	uba2 sae2 uble1b TEgg032e11.1	Xenopus tropicalis (Western clawed frog) (Silurana tropicalis)	641
Q01826	SATB1_HUMAN	reviewed	DNA-binding protein SATB1 (Special AT-rich sequence-binding protein 1)	SATB1	Homo sapiens (Human)	763
Q60611	SATB1_MOUSE	reviewed	DNA-binding protein SATB1 (Special AT-rich sequence-binding protein 1)	Satb1	Mus musculus (Mouse)	764
Q9UPW6	SATB2_HUMAN	reviewed	DNA-binding protein SATB2 (Special AT-rich sequence-binding protein 2)	SATB2 KIAA1034	Homo sapiens (Human)	733
Q8VI24	SATB2_MOUSE	reviewed	DNA-binding protein SATB2 (Special AT-rich sequence-binding protein 2)	Satb2 Kiaa1034	Mus musculus (Mouse)	733
Q9UPN6	SCAF8_HUMAN	reviewed	Protein SCAF8 (CDC5L complex-associated protein 7) (RNA-binding motif protein 16) (SR-related and CTD-associated factor 8)	SCAF8 CCAP7 KIAA1116 RBM16	Homo sapiens (Human)	1271
Q6DID3	SCAF8_MOUSE	reviewed	Protein SCAF8 (RNA-binding motif protein 16) (SR-related and CTD-associated factor 8)	Scaf8 Kiaa1116 Rbm16	Mus musculus (Mouse)	1268
Q63623	SCAF8_RAT	reviewed	Protein SCAF8 (RNA-binding motif protein 16) (SR-related and CTD-associated factor 8)	Scaf8 Rbm16	Rattus norvegicus (Rat)	1268
Q42551	SCE1_ARATH	reviewed	SUMO-conjugating enzyme SCE1 (EC 6.3.2.-) (Protein EMBRYO DEFECTIVE 1637) (Protein hus5 homolog) (SUMO-conjugating enzyme 1) (AtSCE1)	SCE1 AHUS5 EMB1637 At3g57870 T10K17.80	Arabidopsis thaliana (Mouse-ear cress)	160
Q9P0U3	SENP1_HUMAN	reviewed	Sentrin-specific protease 1 (EC 3.4.22.-) (Sentrin/SUMO-specific protease SENP1)	SENP1	Homo sapiens (Human)	644
Q07657	SHS1_YEAST	reviewed	Seventh homolog of septin 1 (Septation protein 7)	SHS1 SEP7 YDL225W	Saccharomyces cerevisiae (strain ATCC 204508 / S288c) (Baker's yeast)	551
P11978	SIR4_YEAST	reviewed	Regulatory protein SIR4 (Silent information regulator 4)	SIR4 ASD1 STE9 UTH2 YDR227W YD9934.12	Saccharomyces cerevisiae (strain ATCC 204508 / S288c) (Baker's yeast)	1358
Q680Q4	SIZ1_ARATH	reviewed	E3 SUMO-protein ligase SIZ1 (EC 6.3.2.-)	SIZ1 At5g60410 At5g60420 MUF9.5 MUF9.70	Arabidopsis thaliana (Mouse-ear cress)	884
Q6L4L4	SIZ1_ORYSJ	reviewed	E3 SUMO-protein ligase SIZ1 (EC 6.-.-.-)	SIZ1 Os05g0125000 LOC_Os05g03430 OSJNBb0079L11.3	Oryza sativa subsp. japonica (Rice)	875
Q04195	SIZ1_YEAST	reviewed	E3 SUMO-protein ligase SIZ1 (EC 6.-.-.-) (SAP and Miz-finger domain-containing protein 1) (Ubiquitin-like protein ligase 1)	SIZ1 ULL1 YDR409W	Saccharomyces cerevisiae (strain ATCC 204508 / S288c) (Baker's yeast)	904
Q6ASW7	SIZ2_ORYSJ	reviewed	E3 SUMO-protein ligase SIZ2 (EC 6.-.-.-)	SIZ2 Os03g0719100 LOC_Os03g50980 B1377B10.3 OsJ_12369	Oryza sativa subsp. japonica (Rice)	813
Q12216	SIZ2_YEAST	reviewed	E3 SUMO-protein ligase SIZ2 (EC 6.-.-.-) (SAP and Miz-finger domain-containing protein 2)	NFI1 SIZ2 YOR156C	Saccharomyces cerevisiae (strain ATCC 204508 / S288c) (Baker's yeast)	726
Q7ZTK7	SMO2A_XENLA	reviewed	Small ubiquitin-related modifier 2-A (SUMO-2-A)	sumo2-a smt3h2	Xenopus laevis (African clawed frog)	95
Q6GPW2	SMO2B_XENLA	reviewed	Small ubiquitin-related modifier 2-B (SUMO-2-B)	sumo2-b	Xenopus laevis (African clawed frog)	95
Q6NV25	SMO3L_DANRE	reviewed	Small ubiquitin-related modifier 3-like (SUMO-3-A)	sumo3l sumo3 sumo3a zgc:65847 zgc:85643	Danio rerio (Zebrafish) (Brachydanio rerio)	94
Q8TAD8	SNIP1_HUMAN	reviewed	Smad nuclear-interacting protein 1 (FHA domain-containing protein SNIP1)	SNIP1	Homo sapiens (Human)	396
Q8BIZ6	SNIP1_MOUSE	reviewed	Smad nuclear-interacting protein 1	Snip1	Mus musculus (Mouse)	383
Q5M9G6	SNIP1_RAT	reviewed	Smad nuclear interacting protein 1	Snip1	Rattus norvegicus (Rat)	389
P00445	SODC_YEAST	reviewed	Superoxide dismutase [Cu-Zn] (EC 1.15.1.1)	SOD1 YJR104C J1968	Saccharomyces cerevisiae (strain ATCC 204508 / S288c) (Baker's yeast)	154
Q8AXX8	SOX10_XENLA	reviewed	Transcription factor Sox-10 (SRY (sex determining region Y)-box 10)	sox10	Xenopus laevis (African clawed frog)	446
A4IIJ8	SOX10_XENTR	reviewed	Transcription factor Sox-10 (SRY (sex determining region Y)-box 10)	sox10	Xenopus tropicalis (Western clawed frog) (Silurana tropicalis)	436
P48431	SOX2_HUMAN	reviewed	Transcription factor SOX-2	SOX2	Homo sapiens (Human)	317
P48432	SOX2_MOUSE	reviewed	Transcription factor SOX-2	Sox2 Sox-2	Mus musculus (Mouse)	319
P54231	SOX2_SHEEP	reviewed	Transcription factor SOX-2	SOX2	Ovis aries (Sheep)	320
P35712	SOX6_HUMAN	reviewed	Transcription factor SOX-6	SOX6	Homo sapiens (Human)	828
P40645	SOX6_MOUSE	reviewed	Transcription factor SOX-6 (SOX-LZ)	Sox6 Sox-6	Mus musculus (Mouse)	827
Q5RCU4	SOX6_PONAB	reviewed	Transcription factor SOX-6	SOX6	Pongo abelii (Sumatran orangutan)	787
B1H349	SOX6_XENTR	reviewed	Transcription factor Sox-6 (SRY (sex determining region Y)-box 6)	sox6	Xenopus tropicalis (Western clawed frog) (Silurana tropicalis)	777
B7ZR65	SOX9A_XENLA	reviewed	Transcription factor Sox-9-A	sox9-a sox9	Xenopus laevis (African clawed frog)	477
Q6DFF5	SOX9B_XENLA	reviewed	Transcription factor Sox-9-B	sox9-b sox9 sox9b	Xenopus laevis (African clawed frog)	476
Q6F2E7	SOX9_XENTR	reviewed	Transcription factor Sox-9 (Xt-sox9)	sox9 TNeu111f21.1	Xenopus tropicalis (Western clawed frog) (Silurana tropicalis)	482
P23497	SP100_HUMAN	reviewed	Nuclear autoantigen Sp-100 (Lysp100b) (Nuclear dot-associated Sp100 protein) (Speckled 100 kDa)	SP100	Homo sapiens (Human)	879
P08047	SP1_HUMAN	reviewed	Transcription factor Sp1	SP1 TSFP1	Homo sapiens (Human)	785
O89090	SP1_MOUSE	reviewed	Transcription factor Sp1	Sp1	Mus musculus (Mouse)	784
Q01714	SP1_RAT	reviewed	Transcription factor Sp1	Sp1	Rattus norvegicus (Rat)	786
Q90WR8	SP3_CHICK	reviewed	Transcription factor Sp3	SP3	Gallus gallus (Chicken)	771
Q02447	SP3_HUMAN	reviewed	Transcription factor Sp3 (SPR-2)	SP3	Homo sapiens (Human)	781
O70494	SP3_MOUSE	reviewed	Transcription factor Sp3	Sp3	Mus musculus (Mouse)	783
P38904	SPP41_YEAST	reviewed	Protein SPP41	SPP41 YDR464W	Saccharomyces cerevisiae (strain ATCC 204508 / S288c) (Baker's yeast)	1435
P42224	STAT1_HUMAN	reviewed	Signal transducer and activator of transcription 1-alpha/beta (Transcription factor ISGF-3 components p91/p84)	STAT1	Homo sapiens (Human)	750
P42225	STAT1_MOUSE	reviewed	Signal transducer and activator of transcription 1	Stat1	Mus musculus (Mouse)	749
Q764M5	STAT1_PIG	reviewed	Signal transducer and activator of transcription 1	STAT1	Sus scrofa (Pig)	757
Q04752	STF1_BOVIN	reviewed	Steroidogenic factor 1 (SF-1) (STF-1) (Adrenal 4-binding protein) (Fushi tarazu factor homolog 1) (Nuclear receptor subfamily 5 group A member 1) (Steroid hormone receptor Ad4BP)	NR5A1 AD4BP FTZF1	Bos taurus (Bovine)	461
Q9GKL2	STF1_HORSE	reviewed	Steroidogenic factor 1 (SF-1) (STF-1) (Nuclear receptor subfamily 5 group A member 1)	NR5A1 SF1	Equus caballus (Horse)	461
Q13285	STF1_HUMAN	reviewed	Steroidogenic factor 1 (SF-1) (STF-1) (Adrenal 4-binding protein) (Fushi tarazu factor homolog 1) (Nuclear receptor subfamily 5 group A member 1) (Steroid hormone receptor Ad4BP)	NR5A1 AD4BP FTZF1 SF1	Homo sapiens (Human)	461
Q95L87	STF1_MACEU	reviewed	Steroidogenic factor 1 (SF-1) (STF-1) (Nuclear receptor subfamily 5 group A member 1)	NR5A1 SF1	Macropus eugenii (Tammar wallaby)	463
P33242	STF1_MOUSE	reviewed	Steroidogenic factor 1 (SF-1) (STF-1) (Adrenal 4-binding protein) (Embryonal LTR-binding protein) (ELP) (Embryonal long terminal repeat-binding protein) (Fushi tarazu factor homolog 1) (Nuclear receptor subfamily 5 group A member 1) (Steroid hormone receptor Ad4BP) (Steroid hydroxylase positive regulator)	Nr5a1 Ftzf1	Mus musculus (Mouse)	462
P79387	STF1_PIG	reviewed	Steroidogenic factor 1 (SF-1) (STF-1) (Adrenal 4-binding protein) (Fushi tarazu factor homolog 1) (Nuclear receptor subfamily 5 group A member 1) (Steroid hormone receptor Ad4BP)	NR5A1 FTZF1	Sus scrofa (Pig)	461
P50569	STF1_RAT	reviewed	Steroidogenic factor 1 (SF-1) (STF-1) (Adrenal 4-binding protein) (Fushi tarazu factor homolog 1) (Nuclear receptor subfamily 5 group A member 1) (Steroid hormone receptor Ad4BP)	Nr5a1 Ftzf1	Rattus norvegicus (Rat)	462
Q5E9D1	SUMO1_BOVIN	reviewed	Small ubiquitin-related modifier 1 (SUMO-1)	SUMO1	Bos taurus (Bovine)	101
Q9MZD5	SUMO1_CERNI	reviewed	Small ubiquitin-related modifier 1 (SUMO-1) (Sentrin)	SUMO1	Cervus nippon (Sika deer)	101
P63165	SUMO1_HUMAN	reviewed	Small ubiquitin-related modifier 1 (SUMO-1) (GAP-modifying protein 1) (GMP1) (SMT3 homolog 3) (Sentrin) (Ubiquitin-homology domain protein PIC1) (Ubiquitin-like protein SMT3C) (Smt3C) (Ubiquitin-like protein UBL1)	SUMO1 SMT3C SMT3H3 UBL1 OK/SW-cl.43	Homo sapiens (Human)	101
P63166	SUMO1_MOUSE	reviewed	Small ubiquitin-related modifier 1 (SUMO-1) (SMT3 homolog 3) (Ubiquitin-homology domain protein PIC1) (Ubiquitin-like protein SMT3C) (Smt3C)	Sumo1 Smt3c Smt3h3 Ubl1	Mus musculus (Mouse)	101
A7WLH8	SUMO1_PIG	reviewed	Small ubiquitin-related modifier 1 (SUMO-1)	SUMO1	Sus scrofa (Pig)	101
Q5R6J4	SUMO1_PONAB	reviewed	Small ubiquitin-related modifier 1 (SUMO-1)	SUMO1	Pongo abelii (Sumatran orangutan)	101
Q5I0H3	SUMO1_RAT	reviewed	Small ubiquitin-related modifier 1 (SUMO-1)	Sumo1	Rattus norvegicus (Rat)	101
Q2EF74	SUMO1_SPETR	reviewed	Small ubiquitin-related modifier 1 (SUMO-1)	SUMO1	Spermophilus tridecemlineatus (Thirteen-lined ground squirrel) (Ictidomys tridecemlineatus)	101
P61955	SUMO2_BOVIN	reviewed	Small ubiquitin-related modifier 2 (SUMO-2) (SMT3 homolog 2) (Sentrin-2) (Ubiquitin-like protein SMT3A) (Smt3A)	SUMO2 SMT3A SMT3H2	Bos taurus (Bovine)	95
Q5ZJM9	SUMO2_CHICK	reviewed	Small ubiquitin-related modifier 2 (SUMO-2)	SUMO2 RCJMB04_17a7	Gallus gallus (Chicken)	95
Q6LDZ8	SUMO2_CRIGR	reviewed	Small ubiquitin-related modifier 2 (SUMO-2) (MIF2 suppressor) (SMT3 homolog 2) (Sentrin-2) (Ubiquitin-like protein SMT3A) (Smt3A)	SUMO2 SMT3A SMT3H2	Cricetulus griseus (Chinese hamster) (Cricetulus barabensis griseus)	95
Q6DHL4	SUMO2_DANRE	reviewed	Small ubiquitin-related modifier 2 (SUMO-2)	sumo2 zgc:92241	Danio rerio (Zebrafish) (Brachydanio rerio)	96
P61956	SUMO2_HUMAN	reviewed	Small ubiquitin-related modifier 2 (SUMO-2) (HSMT3) (SMT3 homolog 2) (SUMO-3) (Sentrin-2) (Ubiquitin-like protein SMT3A) (Smt3A)	SUMO2 SMT3A SMT3H2	Homo sapiens (Human)	95
Q2PFW2	SUMO2_MACFA	reviewed	Small ubiquitin-related modifier 2 (SUMO-2)	SUMO2 QmoA-10533	Macaca fascicularis (Crab-eating macaque) (Cynomolgus monkey)	95
P61957	SUMO2_MOUSE	reviewed	Small ubiquitin-related modifier 2 (SUMO-2) (SMT3 homolog 2) (Sentrin-2) (Ubiquitin-like protein SMT3A) (Smt3A)	Sumo2 Smt3a Smt3h2	Mus musculus (Mouse)	95
P61958	SUMO2_PIG	reviewed	Small ubiquitin-related modifier 2 (SUMO-2) (MIF2 suppressor) (SMT3 homolog 2) (Sentrin-2) (Ubiquitin-like protein SMT3A) (Smt3A)	SUMO2 SMT3A SMT3H2	Sus scrofa (Pig)	95
P61959	SUMO2_RAT	reviewed	Small ubiquitin-related modifier 2 (SUMO-2) (SMT3 homolog 2) (Sentrin-2) (Ubiquitin-like protein SMT3A) (Smt3A)	Sumo2 Smt3a Smt3h2	Rattus norvegicus (Rat)	95
Q28H04	SUMO2_XENTR	reviewed	Small ubiquitin-related modifier 2 (SUMO-2)	sumo2 TEgg046d06.1	Xenopus tropicalis (Western clawed frog) (Silurana tropicalis)	95
Q17QV3	SUMO3_BOVIN	reviewed	Small ubiquitin-related modifier 3 (SUMO-3)	SUMO3	Bos taurus (Bovine)	104
Q5ZHQ1	SUMO3_CHICK	reviewed	Small ubiquitin-related modifier 3 (SUMO-3)	SUMO3 RCJMB04_34j10	Gallus gallus (Chicken)	94
Q6DI05	SUMO3_DANRE	reviewed	Small ubiquitin-related modifier 3 (SUMO-3) (SUMO-3-B)	sumo3 sumo3b zgc:86902	Danio rerio (Zebrafish) (Brachydanio rerio)	94
P55854	SUMO3_HUMAN	reviewed	Small ubiquitin-related modifier 3 (SUMO-3) (SMT3 homolog 1) (SUMO-2) (Ubiquitin-like protein SMT3B) (Smt3B)	SUMO3 SMT3B SMT3H1	Homo sapiens (Human)	103
Q9Z172	SUMO3_MOUSE	reviewed	Small ubiquitin-related modifier 3 (SUMO-3) (SMT3 homolog 1) (Ubiquitin-like protein SMT3B) (Smt3B)	Sumo3 Smt3b Smt3h1	Mus musculus (Mouse)	110
Q5XIF4	SUMO3_RAT	reviewed	Small ubiquitin-related modifier 3 (SUMO-3)	Sumo3	Rattus norvegicus (Rat)	110
Q7SZ22	SUMO3_XENLA	reviewed	Small ubiquitin-related modifier 3 (SUMO-3)	sumo3	Xenopus laevis (African clawed frog)	94
Q6DK72	SUMO3_XENTR	reviewed	Small ubiquitin-related modifier 3 (SUMO-3)	sumo3 TEgg028f07.1	Xenopus tropicalis (Western clawed frog) (Silurana tropicalis)	94
Q13569	TDG_HUMAN	reviewed	G/T mismatch-specific thymine DNA glycosylase (EC 3.2.2.29) (Thymine-DNA glycosylase)	TDG	Homo sapiens (Human)	410
P56581	TDG_MOUSE	reviewed	G/T mismatch-specific thymine DNA glycosylase (EC 3.2.2.29) (C-JUN leucine zipper interactive protein JZA-3) (Thymine-DNA glycosylase)	Tdg	Mus musculus (Mouse)	397
Q9NQB0	TF7L2_HUMAN	reviewed	Transcription factor 7-like 2 (HMG box transcription factor 4) (T-cell-specific transcription factor 4) (T-cell factor 4) (TCF-4) (hTCF-4)	TCF7L2 TCF4	Homo sapiens (Human)	619
Q924A0	TF7L2_MOUSE	reviewed	Transcription factor 7-like 2 (HMG box transcription factor 4) (T-cell-specific transcription factor 4) (T-cell factor 4) (TCF-4) (mTCF-4)	Tcf7l2 Tcf4	Mus musculus (Mouse)	459
O15164	TIF1A_HUMAN	reviewed	Transcription intermediary factor 1-alpha (TIF1-alpha) (EC 6.3.2.-) (E3 ubiquitin-protein ligase TRIM24) (RING finger protein 82) (Tripartite motif-containing protein 24)	TRIM24 RNF82 TIF1 TIF1A	Homo sapiens (Human)	1050
Q64127	TIF1A_MOUSE	reviewed	Transcription intermediary factor 1-alpha (TIF1-alpha) (EC 6.3.2.-) (E3 ubiquitin-protein ligase Trim24) (Tripartite motif-containing protein 24)	Trim24 Tif1 Tif1a	Mus musculus (Mouse)	1051
Q13263	TIF1B_HUMAN	reviewed	Transcription intermediary factor 1-beta (TIF1-beta) (E3 SUMO-protein ligase TRIM28) (EC 6.3.2.-) (KRAB-associated protein 1) (KAP-1) (KRAB-interacting protein 1) (KRIP-1) (Nuclear corepressor KAP-1) (RING finger protein 96) (Tripartite motif-containing protein 28)	TRIM28 KAP1 RNF96 TIF1B	Homo sapiens (Human)	835
Q62318	TIF1B_MOUSE	reviewed	Transcription intermediary factor 1-beta (TIF1-beta) (E3 SUMO-protein ligase TRIM28) (EC 6.3.2.-) (KRAB-A-interacting protein) (KRIP-1) (Tripartite motif-containing protein 28)	Trim28 Krip1 Tif1b	Mus musculus (Mouse)	834
O08629	TIF1B_RAT	reviewed	Transcription intermediary factor 1-beta (TIF1-beta) (E3 SUMO-protein ligase TRIM28) (EC 6.3.2.-) (KRAB-associated protein 1) (Nuclear corepressor KAP-1) (Tripartite motif-containing protein 28)	Trim28 Kap1 Tif1b	Rattus norvegicus (Rat)	835
Q7YR26	TOP1_CHLAE	reviewed	DNA topoisomerase 1 (EC 5.99.1.2) (DNA topoisomerase I)	TOP1	Chlorocebus aethiops (Green monkey) (Cercopithecus aethiops)	767
Q07050	TOP1_CRIGR	reviewed	DNA topoisomerase 1 (EC 5.99.1.2) (DNA topoisomerase I)	TOP1 TOP-1	Cricetulus griseus (Chinese hamster) (Cricetulus barabensis griseus)	767
P11387	TOP1_HUMAN	reviewed	DNA topoisomerase 1 (EC 5.99.1.2) (DNA topoisomerase I)	TOP1	Homo sapiens (Human)	765
Q04750	TOP1_MOUSE	reviewed	DNA topoisomerase 1 (EC 5.99.1.2) (DNA topoisomerase I)	Top1 Top-1	Mus musculus (Mouse)	767
Q9WUL0	TOP1_RAT	reviewed	DNA topoisomerase 1 (EC 5.99.1.2) (DNA topoisomerase I)	Top1	Rattus norvegicus (Rat)	767
P04786	TOP1_YEAST	reviewed	DNA topoisomerase 1 (EC 5.99.1.2) (DNA topoisomerase I) (Maintenance of killer protein 1)	TOP1 MAK1 YOL006C	Saccharomyces cerevisiae (strain ATCC 204508 / S288c) (Baker's yeast)	769
Q9NS56	TOPRS_HUMAN	reviewed	E3 ubiquitin-protein ligase Topors (EC 6.3.2.-) (SUMO1-protein E3 ligase Topors) (Topoisomerase I-binding RING finger protein) (Topoisomerase I-binding arginine/serine-rich protein) (Tumor suppressor p53-binding protein 3) (p53-binding protein 3) (p53BP3)	TOPORS LUN TP53BPL	Homo sapiens (Human)	1045
Q80Z37	TOPRS_MOUSE	reviewed	E3 ubiquitin-protein ligase Topors (EC 6.3.2.-) (SUMO1-protein E3 ligase Topors) (Topoisomerase I-binding RING finger protein) (Topoisomerase I-binding arginine/serine-rich protein) (Tumor suppressor p53-binding protein 3) (p53-binding protein 3) (p53BP3)	Topors	Mus musculus (Mouse)	1033
Q3ZCC3	TRAF6_BOVIN	reviewed	TNF receptor-associated factor 6 (EC 6.3.2.-) (E3 ubiquitin-protein ligase TRAF6)	TRAF6	Bos taurus (Bovine)	542
B6CJY4	TRAF6_CERAT	reviewed	TNF receptor-associated factor 6 (EC 6.3.2.-) (E3 ubiquitin-protein ligase TRAF6)	TRAF6	Cercocebus atys (Sooty mangabey) (Cercocebus torquatus atys)	522
Q9Y4K3	TRAF6_HUMAN	reviewed	TNF receptor-associated factor 6 (EC 6.3.2.-) (E3 ubiquitin-protein ligase TRAF6) (Interleukin-1 signal transducer) (RING finger protein 85)	TRAF6 RNF85	Homo sapiens (Human)	522
B6CJY5	TRAF6_MACMU	reviewed	TNF receptor-associated factor 6 (EC 6.3.2.-) (E3 ubiquitin-protein ligase TRAF6)	TRAF6	Macaca mulatta (Rhesus macaque)	522
P70196	TRAF6_MOUSE	reviewed	TNF receptor-associated factor 6 (EC 6.3.2.-) (E3 ubiquitin-protein ligase TRAF6)	Traf6	Mus musculus (Mouse)	530
A7XUJ6	TRAF6_PIG	reviewed	TNF receptor-associated factor 6 (EC 6.3.2.-) (E3 ubiquitin-protein ligase TRAF6)	TRAF6	Sus scrofa (Pig)	541
B5DF45	TRAF6_RAT	reviewed	TNF receptor-associated factor 6 (EC 6.3.2.-) (E3 ubiquitin-protein ligase TRAF6)	Traf6	Rattus norvegicus (Rat)	530
Q05024	TRI1_YEAST	reviewed	Protein TRI1	TRI1 YMR233W YM9959.15	Saccharomyces cerevisiae (strain ATCC 204508 / S288c) (Baker's yeast)	226
Q969Q1	TRI63_HUMAN	reviewed	E3 ubiquitin-protein ligase TRIM63 (EC 6.3.2.-) (Iris RING finger protein) (Muscle-specific RING finger protein 1) (MuRF-1) (MuRF1) (RING finger protein 28) (Striated muscle RING zinc finger protein) (Tripartite motif-containing protein 63)	TRIM63 IRF MURF1 RNF28 SMRZ	Homo sapiens (Human)	353
Q9UHF7	TRPS1_HUMAN	reviewed	Zinc finger transcription factor Trps1 (Tricho-rhino-phalangeal syndrome type I protein) (Zinc finger protein GC79)	TRPS1	Homo sapiens (Human)	1281
Q925H1	TRPS1_MOUSE	reviewed	Zinc finger transcription factor Trps1	Trps1	Mus musculus (Mouse)	1281
Q90ZS6	TRPS1_XENLA	reviewed	Zinc finger transcription factor Trps1	trps1	Xenopus laevis (African clawed frog)	1271
O75643	U520_HUMAN	reviewed	U5 small nuclear ribonucleoprotein 200 kDa helicase (EC 3.6.4.13) (Activating signal cointegrator 1 complex subunit 3-like 1) (BRR2 homolog) (U5 snRNP-specific 200 kDa protein) (U5-200KD)	SNRNP200 ASCC3L1 HELIC2 KIAA0788	Homo sapiens (Human)	2136
Q9W6H5	UBC9A_DANRE	reviewed	SUMO-conjugating enzyme UBC9-A (EC 6.3.2.-) (SUMO-protein ligase A) (Ubiquitin carrier protein 9-A) (Ubiquitin carrier protein I-A) (Ubiquitin-conjugating enzyme E2 I-A) (Ubiquitin-protein ligase I-A)	ube2ia ubc9a ube2i	Danio rerio (Zebrafish) (Brachydanio rerio)	158
Q9DDJ0	UBC9B_DANRE	reviewed	SUMO-conjugating enzyme UBC9-B (EC 6.3.2.-) (SUMO-protein ligase B) (Ubiquitin carrier protein 9-B) (Ubiquitin carrier protein I-B) (Ubiquitin-conjugating enzyme E2 I-B) (Ubiquitin-protein ligase I-B)	ube2ib ubc9b ube2i2	Danio rerio (Zebrafish) (Brachydanio rerio)	157
P35132	UBC9_ARATH	reviewed	SUMO-conjugating enzyme UBC9 (EC 6.3.2.-) (UBCAT4B) (Ubiquitin carrier protein 9) (Ubiquitin-conjugating enzyme E2 9) (Ubiquitin-conjugating enzyme E2-17 kDa) (Ubiquitin-protein ligase 9)	UBC9 UBC4B At4g27960 T13J8.70	Arabidopsis thaliana (Mouse-ear cress)	148
Q95017	UBC9_CAEEL	reviewed	SUMO-conjugating enzyme UBC9 (EC 6.3.2.-) (SUMO-protein ligase) (Ubiquitin carrier protein 9) (Ubiquitin-conjugating enzyme E2 9) (Ubiquitin-protein ligase 9)	ubc-9 F29B9.6	Caenorhabditis elegans	166
P63283	UBC9_CHICK	reviewed	SUMO-conjugating enzyme UBC9 (EC 6.3.2.-) (SUMO-protein ligase) (Ubiquitin carrier protein 9) (Ubiquitin carrier protein I) (Ubiquitin-conjugating enzyme E2 I) (Ubiquitin-protein ligase I)	UBE2I UBC9 UBCE9	Gallus gallus (Chicken)	158
Q9NGP4	UBC9_DICDI	reviewed	Sumo-conjugating enzyme ubc9 (EC 6.3.2.-) (Sumo-protein ligase) (Ubiquitin carrier protein 9)	ubc9 DDB_G0287693	Dictyostelium discoideum (Slime mold)	159
P63279	UBC9_HUMAN	reviewed	SUMO-conjugating enzyme UBC9 (EC 6.3.2.-) (SUMO-protein ligase) (Ubiquitin carrier protein 9) (Ubiquitin carrier protein I) (Ubiquitin-conjugating enzyme E2 I) (Ubiquitin-protein ligase I) (p18)	UBE2I UBC9 UBCE9	Homo sapiens (Human)	158
O09181	UBC9_MESAU	reviewed	SUMO-conjugating enzyme UBC9 (EC 6.3.2.-) (SUMO-protein ligase) (Ubiquitin carrier protein 9) (Ubiquitin carrier protein I) (Ubiquitin-conjugating enzyme E2 I) (Ubiquitin-protein ligase I)	UBE2I UBC9	Mesocricetus auratus (Golden hamster)	158
P63280	UBC9_MOUSE	reviewed	SUMO-conjugating enzyme UBC9 (EC 6.3.2.-) (SUMO-protein ligase) (Ubiquitin carrier protein 9) (mUBC9) (Ubiquitin carrier protein I) (Ubiquitin-conjugating enzyme E2 I) (Ubiquitin-protein ligase I)	Ube2i Ubc9 Ubce2i Ubce9	Mus musculus (Mouse)	158
Q6Y1Z4	UBC9_PAGMA	reviewed	SUMO-conjugating enzyme UBC9 (EC 6.3.2.-) (SUMO-protein ligase) (Ubiquitin carrier protein I) (Ubiquitin-conjugating enzyme E2 I) (Ubiquitin-protein ligase I)	ube2i	Pagrus major (Red sea bream) (Chrysophrys major)	158
P63281	UBC9_RAT	reviewed	SUMO-conjugating enzyme UBC9 (EC 6.3.2.-) (SUMO-protein ligase) (Ubiquitin carrier protein 9) (Ubiquitin carrier protein I) (Ubiquitin-conjugating enzyme E2 I) (Ubiquitin-conjugating enzyme UbcE2A) (Ubiquitin-protein ligase I)	Ube2i Ubce9	Rattus norvegicus (Rat)	158
P40984	UBC9_SCHPO	reviewed	SUMO-conjugating enzyme ubc9 (EC 6.3.2.-) (SUMO protein ligase) (Ubiquitin carrier protein 9) (Ubiquitin carrier protein hus5) (Ubiquitin-conjugating enzyme E2-18 kDa) (Ubiquitin-protein ligase hus5)	hus5 ubc9 SPAC30D11.13	Schizosaccharomyces pombe (strain 972 / ATCC 24843) (Fission yeast)	157
Q2EF73	UBC9_SPETR	reviewed	SUMO-conjugating enzyme UBC9 (EC 6.3.2.-) (SUMO-protein ligase) (Ubiquitin carrier protein 9) (Ubiquitin carrier protein I) (Ubiquitin-conjugating enzyme E2 I) (Ubiquitin-protein ligase I)	UBE2I UBC9	Spermophilus tridecemlineatus (Thirteen-lined ground squirrel) (Ictidomys tridecemlineatus)	158
P63282	UBC9_XENLA	reviewed	SUMO-conjugating enzyme UBC9 (EC 6.3.2.-) (SUMO-protein ligase) (Ubiquitin carrier protein 9) (Ubiquitin carrier protein I) (Ubiquitin-conjugating enzyme E2 I) (Ubiquitin-protein ligase I)	ube2i ubc9 ubce9	Xenopus laevis (African clawed frog)	158
Q28CQ4	UBC9_XENTR	reviewed	SUMO-conjugating enzyme UBC9 (EC 6.3.2.-) (SUMO-protein ligase) (Ubiquitin carrier protein 9) (Ubiquitin carrier protein I) (Ubiquitin-conjugating enzyme E2 I) (Ubiquitin-protein ligase I)	ube2i ubc9 ubce9 TEgg019l14.1 TEgg096h05.1	Xenopus tropicalis (Western clawed frog) (Silurana tropicalis)	158
P50623	UBC9_YEAST	reviewed	SUMO-conjugating enzyme UBC9 (EC 6.3.2.-) (Ubiquitin carrier protein 9) (Ubiquitin-conjugating enzyme E2-18 kDa) (Ubiquitin-protein ligase)	UBC9 YDL064W	Saccharomyces cerevisiae (strain ATCC 204508 / S288c) (Baker's yeast)	157
P61085	UBE2K_BOVIN	reviewed	Ubiquitin-conjugating enzyme E2 K (EC 6.3.2.19) (Huntingtin-interacting protein 2) (HIP-2) (Ubiquitin carrier protein) (Ubiquitin-conjugating enzyme E2-25 kDa) (Ubiquitin-conjugating enzyme E2(25K)) (Ubiquitin-conjugating enzyme E2-25K) (Ubiquitin-protein ligase)	UBE2K HIP2	Bos taurus (Bovine)	200
P61086	UBE2K_HUMAN	reviewed	Ubiquitin-conjugating enzyme E2 K (EC 6.3.2.19) (Huntingtin-interacting protein 2) (HIP-2) (Ubiquitin carrier protein) (Ubiquitin-conjugating enzyme E2-25 kDa) (Ubiquitin-conjugating enzyme E2(25K)) (Ubiquitin-conjugating enzyme E2-25K) (Ubiquitin-protein ligase)	UBE2K HIP2 LIG	Homo sapiens (Human)	200
P61087	UBE2K_MOUSE	reviewed	Ubiquitin-conjugating enzyme E2 K (EC 6.3.2.19) (Huntingtin-interacting protein 2) (HIP-2) (Ubiquitin carrier protein) (Ubiquitin-conjugating enzyme E2-25 kDa) (Ubiquitin-conjugating enzyme E2(25K)) (Ubiquitin-conjugating enzyme E2-25K) (Ubiquitin-protein ligase)	Ube2k Hip2	Mus musculus (Mouse)	200
Q9UHP3	UBP25_HUMAN	reviewed	Ubiquitin carboxyl-terminal hydrolase 25 (EC 3.4.19.12) (Deubiquitinating enzyme 25) (USP on chromosome 21) (Ubiquitin thiolesterase 25) (Ubiquitin-specific-processing protease 25)	USP25 USP21	Homo sapiens (Human)	1055
P57080	UBP25_MOUSE	reviewed	Ubiquitin carboxyl-terminal hydrolase 25 (EC 3.4.19.12) (Deubiquitinating enzyme 25) (Ubiquitin thiolesterase 25) (Ubiquitin-specific-processing protease 25) (mUSP25)	Usp25	Mus musculus (Mouse)	1055
Q17QU6	UIF_BOVIN	reviewed	UAP56-interacting factor (Forty-two-three domain-containing protein 1) (Protein 40-2-3)	FYTTD1 UIF	Bos taurus (Bovine)	318
Q96QD9	UIF_HUMAN	reviewed	UAP56-interacting factor (Forty-two-three domain-containing protein 1) (Protein 40-2-3)	FYTTD1 UIF	Homo sapiens (Human)	318
Q91Z49	UIF_MOUSE	reviewed	UAP56-interacting factor (Forty-two-three domain-containing protein 1) (Protein 40-2-3)	Fyttd1 Uif	Mus musculus (Mouse)	317
Q7TQ84	UIF_RAT	reviewed	UAP56-interacting factor (Forty-two-three domain-containing protein 1) (Protein 40-2-3)	Fyttd1 Uif Ac1176	Rattus norvegicus (Rat)	317
Q08562	ULS1_YEAST	reviewed	ATP-dependent helicase ULS1 (EC 3.6.4.-) (Role in silencing protein 1) (Ubiquitin ligase for SUMO conjugates protein 1)	ULS1 DIS1 RIS1 TID4 YOR191W	Saccharomyces cerevisiae (strain ATCC 204508 / S288c) (Baker's yeast)	1619
B7ZSG3	WT1A_XENLA	reviewed	Wilms tumor protein homolog A (XWT1a) (xWT1)	wt1-a wt1	Xenopus laevis (African clawed frog)	414
P79958	WT1B_XENLA	reviewed	Wilms tumor protein homolog B (XWT1b) (XeWT1)	wt1-b wt1	Xenopus laevis (African clawed frog)	407
P19544	WT1_HUMAN	reviewed	Wilms tumor protein (WT33)	WT1	Homo sapiens (Human)	449
P22561	WT1_MOUSE	reviewed	Wilms tumor protein homolog	Wt1 Wt-1	Mus musculus (Mouse)	449
O62651	WT1_PIG	reviewed	Wilms tumor protein homolog	WT1	Sus scrofa (Pig)	449
P49952	WT1_RAT	reviewed	Wilms tumor protein homolog	Wt1 Wt-1	Rattus norvegicus (Rat)	448
B5DE03	WT1_XENTR	reviewed	Wilms tumor protein homolog	wt1	Xenopus tropicalis (Western clawed frog) (Silurana tropicalis)	413
Q13426	XRCC4_HUMAN	reviewed	DNA repair protein XRCC4 (X-ray repair cross-complementing protein 4)	XRCC4	Homo sapiens (Human)	336
P37275	ZEB1_HUMAN	reviewed	Zinc finger E-box-binding homeobox 1 (NIL-2-A zinc finger protein) (Negative regulator of IL2) (Transcription factor 8) (TCF-8)	ZEB1 AREB6 TCF8	Homo sapiens (Human)	1124
Q60542	ZEB1_MESAU	reviewed	Zinc finger E-box-binding homeobox 1 (Transcription factor 8) (TCF-8) (Zinc finger protein BZP)	ZEB1 BZP TCF8	Mesocricetus auratus (Golden hamster)	1043
Q64318	ZEB1_MOUSE	reviewed	Zinc finger E-box-binding homeobox 1 (Delta EF1) (Transcription factor 8) (TCF-8) (Zinc finger homeobox protein 1a) (MEB1)	Zeb1 Tcf8 Zfhx1a Zfx1a Zfx1ha	Mus musculus (Mouse)	1117
Q62947	ZEB1_RAT	reviewed	Zinc finger E-box-binding homeobox 1 (Transcription factor 8) (TCF-8) (Zinc finger homeodomain enhancer-binding protein) (Zfhep)	Zeb1 Tcf8	Rattus norvegicus (Rat)	1109
O60315	ZEB2_HUMAN	reviewed	Zinc finger E-box-binding homeobox 2 (Smad-interacting protein 1) (SMADIP1) (Zinc finger homeobox protein 1b)	ZEB2 KIAA0569 SIP1 ZFHX1B ZFX1B HRIHFB2411	Homo sapiens (Human)	1214
Q9R0G7	ZEB2_MOUSE	reviewed	Zinc finger E-box-binding homeobox 2 (Smad-interacting protein 1) (Zinc finger homeobox protein 1b)	Zeb2 Sip1 Zfhx1b Zfx1b	Mus musculus (Mouse)	1215

## Sheet: Blomster
Supplemental table 1. Sumoylated peptides observed with QSTAR Pulsar
prot_acc	prot_desc	prot_mass	pep_seqa	SUMO site	pep_exp_mz	pep_exp_mr	pep_exp_z	pep_calc_mr	pep_delta	ppm	pep_miss	pep_score	pep_homol	pep_ident	pep_expect	pep_res_before	pep_res_after	2nd_candidate_seqb	2nd_candidate_score	delta_score
sp|P46060|RAGP1_HUMAN	Ran GTPase-activating protein 1 OS=Homo sapiens GN=RANGAP1 PE=1 SV=1	63502	516LLVHMGLL(GG-)KSEDK528	K524	532.966	1595.88	3	1595.87	0.0064	4.01035	1	16.07	29	30	1.5	R	V	-	-	n.a.
sp|Q13263|TIF1B_HUMAN	Transcription intermediary factor 1-beta OS=Homo sapiens GN=TRIM28 PE=1 SV=5	88493	775LTED(GG-)KADVQSIIGLQR790	K779	633.996	1898.97	3	1899.01	-0.04	-21.0637	1	28.19	30	34	0.21	K	F	Ac-ELWGRoxMLWALLSGPGR	15.7	12.49
sp|P63165|SUMO1_HUMAN	Small ubiquitin-related modifier 1 OS=Homo sapiens GN=SUMO1 PE=1 SV=1	11550	Ac-2SDQEA(GG-)KPSTEDLGDKK17	K7	635.298	1902.87	3	1902.88	-0.0072	-3.78374	1	44.03	25	36	0.0095	M	E	CRLGAESPSIASTSSpTEK	9.8	34.23
sp|P61956|SUMO2_HUMAN	Small ubiquitin-related modifier 2 OS=Homo sapiens GN=SUMO2 PE=1 SV=1	10864	8EGV(GG-)KTENNDHINLK21	K11	575.624	1723.85	3	1723.85	0.001	0.580097	1	14.34	17	35	6.6	K	V	pTGAAGERLKEGSNINK	3.2	11.14
sp|Q9UBG0|MRC2_HUMAN	C-type mannose receptor 2 OS=Homo sapiens GN=MRC2 PE=1 SV=1	166549	1139LLQ(GG-)KPLR1145	K1142	491.328	980.641	2	980.613	0.0284	28.9615	0	21.92		21	0.043	R	W	ILQLLPER	18.5	3.42
sp|Q8IYA6|CKP2L_HUMAN	Cytoskeleton-associated protein 2-like OS=Homo sapiens GN=CKAP2L PE=1 SV=3	83466	198(GG-)KPDPKLpYTR206	K198	656.331	1310.65	2	1310.64	0.009	6.86688	1	26.81		34	0.33	R	S	GTpSEPEKSLRK	23.1	3.71
Supplemental table 2. Sumoylated peptides observed with LTQ-Orbitrap XLc
prot_acc	prot_desc	prot_mass	pep_seqa	SUMO site	pep_exp_mz	pep_exp_mr	pep_exp_z	pep_calc_mr	pep_delta	ppm	pep_miss	pep_score	pep_homol	pep_ident	pep_expect	pep_res_before	pep_res_after	2nd_candidate_seqb	2nd_candidate_score	delta_score
sp|P46060|RAGP1_HUMAN	Ran GTPase-activating protein 1 OS=Homo sapiens GN=RANGAP1 PE=1 SV=1	63502	516LLVHMGLL(GG-)KSEDK528	K524	532.963	1595.87	3	1595.87	-0.0018	-1.12791	1	29.49	20	22	0.011	R	V	LLPRWASnemCWLVK	5.9	23.59
			Ac-2ASEDIA(GG-)KLAETLAK15	K8	808.429	1614.84	2	1614.85	-0.0036	-2.22931	1	48.48	24	25	0.00025	M	T	EEWAKTKDPTAALR	8.9	39.58
sp|Q13263|TIF1B_HUMAN	Transcription intermediary factor 1-beta OS=Homo sapiens GN=TRIM28 PE=1 SV=5	88493	775LTED(GG-)KADVQSIIGLQR790	K779	634.009	1899.01	3	1899.01	0.0001	0.0526591	1	41.6		25	0.0012	K	F	INSIV(GG-)KSQSQnemCGLKR	10.3	31.3
sp|P63165|SUMO1_HUMAN	Small ubiquitin-related modifier 1 OS=Homo sapiens GN=SUMO1 PE=1 SV=1	11550	Ac-2SDQEA(GG-)KPSTEDLGDKK17	K7	635.298	1902.87	3	1902.88	-0.0071	-3.73119	1	32.45		29	0.026	M	E	DSD(GG-)KGKYpTLEIAAG(GG-)K	15	17.45
			24L(GG-)KVIGQDSSEIHFK37	K25	572.308	1713.9	3	1713.9	-0.0043	-2.50889	1	30.22	18	25	0.018	K	V	IVVHLGLpSGEANAARK	3.4	26.82
sp|P61956|SUMO2_HUMAN	Small ubiquitin-related modifier 2 OS=Homo sapiens GN=SUMO2 PE=1 SV=1	10864	8EGV(GG-)KTENNDHINLK21	K11	575.622	1723.84	3	1723.85	-0.0054	-3.13253	1	16.82		28	0.72	K	V	VSGI(GG-)KpS(GG-)KVDEL(GG-)K	14.9	1.92
sp|Q16666|IF16_HUMAN	Gamma-interferon-inducible protein Ifi-16 OS=Homo sapiens GN=IFI16 PE=1 SV=3	88199	560L(GG-)KTEPEEVSIEDSAQSDLK578	K561	744.699	2231.07	3	2231.08	-0.006	-2.68928	1	58.92	26	29	6e-05	R	E	KAGSLYLSGAPGTG(GG-)KpTACLSR	9.5	49.42
sp|Q9UPN6|RBM16_HUMAN	Putative RNA-binding protein 16 OS=Homo sapiens GN=RBM16 PE=1 SV=1	140433	6pTFNSELYSLNDY(GG-)KPPISKAK25	K18	837.069	2508.18	3	2508.19	-0.0091	-3.62811	1	37.02	23	30	0.012	K	M	-	-	n.a.
sp|Q9UG01|IF172_HUMAN	Intraflagellar transport protein 172 homolog OS=Homo sapiens GN=IFT172 PE=1 SV=2	197451	Ac-1MHL(GG-)KHLR7	K4	545.803	1089.59	2	1089.59	0.0054	4.95601	1	30.03		24	0.014	-	T	QPVTKNTFR	15.1	14.93
sp|Q99518|FMO2_HUMAN	Dimethylaniline monooxygenase [N-oxide-forming] 2 OS=Homo sapiens GN=FMO2 PE=2 SV=3	60868	486NAIFTQ(GG-)KQRILKPLK500	K492	638.053	1911.14	3	1911.14	-0.0045	-2.35461	2	16.29		13	0.023	R	T	-	-	n.a.
sp|Q96QD9|FYTD1_HUMAN	Forty-two-three domain-containing protein 1 OS=Homo sapiens GN=FYTTD1 PE=1 SV=2	35777	139R(GG-)KANLLR145	K140	492.807	983.6	2	983.599	0.0015	1.52501	2	22.82		20	0.028	K	Q	EAARRLLR	17.8	5.02
sp|Q9UBD0|HSFX1_HUMAN	Heat shock transcription factor, X-linked OS=Homo sapiens GN=HSFX1 PE=2 SV=1	46712	211RVGV(GG-)KSAPR219	K215	542.323	1082.63	2	1082.63	0.0003	0.277103	2	21.14		19	0.036	R	H	VGAAGGARGVIR	11	10.14
sp|Q8IYA6|CKP2L_HUMAN	Cytoskeleton-associated protein 2-like OS=Homo sapiens GN=CKAP2L PE=1 SV=3	83466	198(GG-)KPDPKLpYTR206	K198	656.329	1310.64	2	1310.64	0.0043	3.28084	1	17.91	23	26	0.36	R	S	LEVSLpTLTN(GG-)K	9.1	8.81

## Sheet: Matic
Gene Names	Sequence Window	Position
ACIN1	AQPLPLKIEELAL	532
ACTB	EAPLNPKANREKM	142
ADAR	GQEPVIKLENRQE	461
AHNAK	FSMPGFKAEGPEV	891
ANX5	TLRKAMKGLGTDE	29
APC4	NKPVKIKEEVLSE	772
APC4	APEIVIKVEKLDP	798
ARID4B	VKEIKVKEENETE	429
BCLAF1	TFQKRPKEEEWDP	831
BRD4	QPLVVVKEEKIHS	1111
CANX	APQPDVKEEEEEK	525
CCAR1	LPTPTVKQESKDV	1012
CD3EAP	PEDKTVKQEQINT	272
ERBB2IP	TIVHRLKDEETNE	506
FLNA	PTGNMVKKRAEFT	299
FNBP4	RRKVICKEEPVSE	348
FOSL2	VGAVVVKQEPLEE	222
GEMIN5	TLRTPVKLESIDG	754
GRL	CTPGVIKQEKLGT	293
GRL	VTLPQVKTEKEDF	277
GTF2I	DGSSQIKQEPDPT	991
HNRNPC	VEMKNDKSEEEQS	232
HNRNPM	KGCGVVKFESPEV	698
HNRNPM	VAATEIKMEEESG	17
HNRNPUL1	YDTQVIKQENESG	117
IFI16	TLKPRLKTEPEEV	561
KDM2B	KPLRRFKQEPEDE	890
KHDRBS1	KMEPENKYLPELM	102
KRT5	IKTLNNKFASFID	194
LMNA	EIHAYRKLLEGEE	378
MAP4	KKPTAIKTEGKPA	838
MKI67	VQKVQVKEEPSAV	2734
MYO1B	LGNIEFKPESRVN	287
NAB1	LEKKVIKTEPEDS	480
NOL5	KAKIKVKVEEEEE	467
NOL5	GKKKHIKEEPLSE	497
NOLA2	__MTKIKADPDGP	5
NP60	ITPTDKKIGFLGL	269
NSBP1	KEIVEVKEENIED	101
NUMA1	SQRLPPKVESLES	1766
PARP1	PWGAEVKAEPVEV	486
PBRM1	EIYYFRKPIVPQK	1293
PML	CPRKVIKMESEEG	490
PNN	VRNEEQKAEQEEG	304
PSMD12	NIMLLSKRRSQLK	92
PTRF	IYQDEVKLPAKLS	161
RANBP2	EQSSDSKVKNLFA	2592
RANBP2	SSDSKVKNLFASF	2594
RANBP2	QSGSESKVEPKKC	2571
RANGAP1	VHMGLLKSEDKVK	526
RBM12B	RKTRPLKAENPYL	151
RBM25	RRQPQIKQEPESE	578
RLF	DIKKSVKLEESAT	839
RLF	KYGTKIKEEPPSE	1597
RREB1	SMEAKIKQEITEG	615
RSF1	LEETTVKKEKEDE	277
RSF1	KESEKMKSEEQPM	254
RSF1	KLPVIVKLEKPLP	294
RSF1	EEKKIIKEESDSF	309
RSF1	FLKDEIKQEEETC	419
RSF1	RVAPNFKTEPIET	456
SAE2	HSEDLGKDVEFEV	540
SAFB2	CKSEPVKEESSEL	230
SAFB2	ILGETCKSEPVKE	225
SAFB2	HHSVEIKIEKTVI	517
SAFB2	KEEKDIKPIIKDE	391
SAFB2	SLLAVVKREPAEQ	293
SAP18	VTQEEIKKEPEKP	32
SART1	LEVNAIKKEAGTK	141
SEC22B	EAAFPKKLAFAYL	82
SF3B1	MFPEGYKVLPPPA	413
SLK	FENKLIKSEEIKD	487
SNIP-1	PAGVVVKQERLSP	30
SNRPD2	SLLNKPKSEMTPE	8
STAT1	KGTGYIKTELISV	703
SUMO1	MSDQEAKPSTEDL	7
SUMO2	KPKEGVKTENNDH	11
SYMPK	STLKKMKLEPNLG	361
TCOF1	PTVTQVKAEKQED	755
THOC1	APYLEMKDSEIRQ	595
TOP1	SSPPQIKDEPEDD	117
TOP2	KNKKKIKNENTEG	1276
TOP2	RITIEMKAEAEKK	1309
TRIM24	LEPIRIKQENSGP	723
TRIM28; TIF1B	NKLTEDKADVQSI	779
TRIM28; TIF1B	RARLQEKLSPPYS	750
TRIM28; TIF1B	EAFGDTKFSAVLV	804
TRIM33	SDQVKVKQEPGTE	776
VASP	VGEKTPKDESANQ	286
YLPM1	RGPGLVKQEDFRD	1053
ZBTB1	RKRIIIKMEPEDI	328
ZBTB2	PVLASIKKEQETV	505
ZBTB38	IIVEDTKFKAHSN	43
ZBTB9	PKIFYIKQEPFEP	286
ZMYM1	GLLDEIKTEPDNA	25
ZMYM4	ASNIRIKEEPLDD	250
ZMYM4	GLLDKIKDEPDNA	273
ZMYND8	TNPVEIKEELKST	665
ZNF280C	SSSKGIKSEPHSP	75
ZNF280C	FLGVIVKSERPCD	273
ZNF295	LIVGDQKFRAHKN	40
ZNF451	KTETSIKTEDDFP	706
ZNF800	SSEIKVKVEPADS	409

## Sheet: Matic2008
LC-MS/MS run	Peptide	Charge	Observed mass [m/z]	Mass deviation [ppm]	Elution Time [min]	Intensity [XIC]
SUMO-1,SUMO-2 in vitro (MS in ICR-FT, MSMS in LTQ)	SUMO-2 (59-92)/SUMO-2 (8-20)	5+	1070.7	0.6502	107.64	10752000
	SUMO-2 (59-92)/SUMO-2 (-2-7)	4+	1212.05	4.0841	107.26	649420
	SUMO-1 (79-97)/SUMO-2 (8-20)	4+	908.927	-1.7584	100.09	9690100
	SUMO-1 (79.97)/SUMO-2 (-2-7)	3+	1043.47	1.4163	97.624	174610
SUMO-1,SUMO-2 in vitro (MS and MSMS in orbitrap)	SUMO-1 (79-97)/SUMO-2 (8-20)	4+	908.928	0.028373	103.79	18566000
SUMO-2 in vitro (MS in orbitrap, MSMS in LTQ)	SUMO-2 (59-92)/SUMO-2 (8-20)	4+	1338.12	-0.16	110	5519600
HIF-1 alpha (MS in orbitrap, MSMS in LTQ)	SUMO-1 (79-97)/SUMO-2 (8-20)	4+	908.928	-0.67647	96.719	545270
	SUMO-2 (59-92)/SUMO-2 (8-20)	5+	1070.7	0.6	106.19	309460
	SUMO-2 (59-92)/HIF-alpha(390-392)	4+	1061.01	-0.62	105.7	140780
GST-SUMO-1 gel (MS in ICR-FT, MSMS in LTQ)	SUMO-1 (79-97)/SUMO-2 (8-20)	4+	908.928	0.14918	100.53	71340
GST-SUMO-1 solution (MS in orbitrap, MSMS in LTQ)	SUMO-1 (79-97)/SUMO-3 (8-21)	4+	937.439	0.14808	102.09	412260
GST-SUMO-1 solution (MS SIM in orbitrap, MSMS in LTQ)	SUMO-1 (79-97)/SUMO-2 (8-20)	4+	908.928	-0.68284	97.345	1475900
His-SUMO2 (MS in orbitrap, MSMS in LTQ)	SUMO-2 (59-92)/SUMO-2 (8-20)	5+	1070.7	-1.0274	108.92	17070000
	SUMO-2 (59-92)/SUMO-3 (8-21)	5+	1093.51	-0.44917	108.32	2546700
His-SUMO2 (MS SIM in orbitrap, MSMS in LTQ)	SUMO-1 (79-97)/SUMO-2 (8-20)	4+	908.927	-1.4925	97.479	4162800
IP (MS in orbitrap, MSMS in LTQ)	SUMO-2 (59-92)/SUMO-2 (8-20)	5+	1070.7	-0.52359	107.73	143840

## Sheet: HSIAO
Digestion	Sample	Accession Number	Protein Name	Mascot Peptide Score	Sequest XCorr	Sequence	Position	Modification
In-Gel	RanGap1-SUMO1 (Figure 3A)	P46061	RanGap1	110.29	6.44937	ELGMoxEEEDVIEVYQEQTGG-LLIHMoxGLLKSEDK	K526	2 Oxidation (M)
				61.9	4.81403	ELGMoxEEEDVIEVYQEQTGG-GKGLK	K28	Oxidation (M)
				72.02	5.49771	ELGMoxEEEDVIEVYQEQTGG-TQVAGGQLSFKGK	K26	Oxidation (M)
		Q9UBT2	SUMO-activating enzyme subunit 2	142.58	7.3875	ELGMEEEDVIEVYQEQTGG-ASNEDGDIKR	K236
	SP100-SUMO1 (Figure 3B)	P23497	SP100	57.22	5.08276	ELGMoxEEEDVIEVYQEQTGG-LVDIKK	K297	Oxidation (M)
				50.53	5.40201	ELGMEEEDVIEVYQEQTGG-ESFKK	K396
				70.11	4.90026	ELGMEEEDVIEVYQEQTGG-KLSTFR	K387
		Q9UBT2	SUMO-activating enzyme subunit 2	138.57	6.572	ELGMEEEDVIEVYQEQTGG-ASNEDGDIKR	K236
	p53-SUMO1 (Figure 3C)	P04637	p53	87.38	6.2155	ELGMEEEDVIEVYQEQTGG-HMoxFKTEGPDSD	K386	Oxidation (M)
		Q9UBT2	SUMO-activating enzyme subunit 2	152.52	7.18233	ELGMEEEDVIEVYQEQTGG-ASNEDGDIKR	K236
	Uba2-SUMO1 (Figure 3D)	Q9UBT2	SUMO-activating enzyme subunit 2	99.43	5.97499	ELGMEEEDVIEVYQEQTGG-ENLSAKR	K623
				46.63	4.24561	ELGMoxEEEDVIEVYQEQTGG-LFTKLFK	K257	Oxidation (M)
				160.71	7.11606	ELGMEEEDVIEVYQEQTGG-ASNEDGDIKR	K236
				124.39	7.65434	ELGMEEEDVIEVYQEQTGG-YLLTMDKLWR	K271
				41.8	3.79926	ELGMoxEEEDVIEVYQEQTGG-SRIEQKEELDDVIALD	K630	Oxidation (M)
In-Gel	RanGap1-SUMO2	P46061	RanGap1	118.17	8.26719	FDGQPINETDTPAQLEMEDEDTIDVFQQQTGG-LLIHMGLLKSEDK	K526
	YFP-SP100-SUMO2	P23497	SP100	121.98	7.93747	FDGQPINETDTPAQLEMoxEDEDTIDVFQQQTGG-LVDIKK	K297	Oxidation (M)
				80.63	6.97382	FDGQPINETDTPAQLEMoxEDEDTIDVFQQQTGG-ESFKK	K396	Oxidation (M)
				136.33	7.15716	FDGQPINETDTPAQLEMoxEDEDTIDVFQQQTGG-KLSTFR	K387	Oxidation (M)
				77.83	6.5608	FRFDGQPINETDTPAQLEMoxEDEDTIDVFQQQTGG-SKHGEK	K426	Oxidation (M)
		Q9UBT2	SUMO-activating enzyme subunit 2	45.79	5.77408	FRFDGQPINETDTPAQLEMoxEDEDTIDVFQQQTGG-SKAQVAK	K72	Oxidation (M)
		P61956	Small ubiquitin-related modifier 2	62.85	7.18906	FDGQPINETDTPAQLEMEDEDTIDVFQQQTGG-GSHMoxADEKPK	K5	Oxidation (M)
				85.81	7.97999	FDGQPINETDTPAQLEMoxEDEDTIDVFQQQTGG-EGVKTENNDHINLK	K11	Oxidation (M)
	GST-SP100-SUMO2	P23497	SP100	85.66	6.56197	FDGQPINETDTPAQLEMEDEDTIDVFQQQTGG-ESFKK	K396
				132.34	7.2491	FDGQPINETDTPAQLEMEDEDTIDVFQQQTGG-KLSTFR	K387
		Q9UBT2	SUMO-activating enzyme subunit 2	41.64	2.75881	FRFDGQPINETDTPAQLEMoxEDEDTIDVFQQQTGG-ASNEDGDIKR	K236	Oxidation (M)
		P61956	Small ubiquitin-related modifier 2	61.31	6.63282	FDGQPINETDTPAQLEMEDEDTIDVFQQQTGG-EGVKTENNDHINLK	K11
	p53-SUMO2	P04637	p53	110.79	6.80599	FDGQPINETDTPAQLEMEDEDTIDVFQQQTGG-HMFKTEGPDSD	K386
		Q9UBT2	SUMO-activating enzyme subunit 2	84.76	7.73207	FRFDGQPINETDTPAQLEMoxEDEDTIDVFQQQTGG-ASNEDGDIKR	K236	Oxidation (M)
		P61956	Small ubiquitin-related modifier 2	50.02	7.67258	FDGQPINETDTPAQLEMoxEDEDTIDVFQQQTGG-EGVKTENNDHINLK	K11	Oxidation (M)
				45.79	4.89981	FDGQPINETDTPAQLEMoxEDEDTIDVFQQQTGG-GSHMoxADEKPK	K5	2 Oxidation (M)
	Uba2-SUMO2	Q9UBT2	SUMO-activating enzyme subunit 2	152.29	9.74731	FRFDGQPINETDTPAQLEMEDEDTIDVFQQQTGG-ASNEDGDIKR	K236
		P61956	Small ubiquitin-related modifier 2	73.74	6.74142	FDGQPINETDTPAQLEMoxEDEDTIDVFQQQTGG-GSHMoxADEKPK	K5	2 Oxidation (M)
				21.68	6.05685	FDGQPINETDTPAQLEMoxEDEDTIDVFQQQTGG-EGVKTENNDHINLK	K11	Oxidation (M)
Digestion	Sample	Accession Number	Protein Name	Mascot Peptide Score	Sequest XCorr	Sequence	Position	Modification	Stadnard DDA	High M.W. DDS
In-Solution	USP25-SUMO2 (Figure 4)	Q9UHP3	USP25	181.95	8.62333	FRFDGQPINETDTPAQLEMEDEDTIDVFQQQTGG-ACLKR	K145			X
				87.73	7.89391	FRFDGQPINETDTPAQLEMEDEDTIDVFQQQTGG-NQKEHR	K214			X
				187.12	8.88814	FRFDGQPINETDTPAQLEMEDEDTIDVFQQQTGG-LLASQKLR	K721		X	X
				128.21	9.47572	FRFDGQPINETDTPAQLEMEDEDTIDVFQQQTGG-ALQEKLLASQK	K715			X
				75.48	8.1818	FRFDGQPINETDTPAQLEMEDEDTIDVFQQQTGG-SVIHKPFTQSR	K520			X
				135.63	7.98862	FRFDGQPINETDTPAQLEMEDEDTIDVFQQQTGG-HLKEETIQIITK	K754			X
				142.99	9.70335	FRFDGQPINETDTPAQLEMEDEDTIDVFQQQTGG-VLEASIAENKACLK	K141			X
				17.93	5.67614	FRFDGQPINETDTPAQLEMEDEDTIDVFQQQTGG-SFHEPPKLPSYSTHELCER	K1059			X
		P61956	SUMO2	93.67	8.49018	FDGQPINETDTPAQLEMEDEDTIDVFQQQTGG-GSHMADEKPK	K5			X
Band	Accession Number	Protein Name	Exp. m/z	Exp. M.W.	Charge	Cal. M.W.	Delta	Miss Cleavage	Peptide Score	Expect	Sequence	Position	Modification	MH+	DeltaM	z	Type	P (pep)	XC	DeltaCn	Sp	RSp	Ions
	P46060	RanGAP1	-	-	-	-	-	-	-	-	ELGMEEEDVIEVYQEQTGG-LLVHMGLLKSEDKVK	K524		3845.92	0.0037726	4	CID	0.971929	2.89505	0.502492	170.52	1	24/198
			966.236	3860.91	4	3860.91	0.0072	0	1.14	0.77	ELGMoxEEEDVIEVYQEQTGG-LLVHMGLLKSEDKVK	K524	Oxidation (M)	3861.91	-0.0121385	4	CID	0.486057	3.06144	0.036915	349.776	1	33/198
			776.388	3876.9	5	3876.9	0.0011	0	5.55	0.28	ELGMoxEEEDVIEVYQEQTGG-LLVHMoxGLLKSEDKVK	K524	2 Oxidation (M)	3877.91	0.00111177	5	CID	0.951961	3.17918	0.179187	1357.9	1	54/264
			970.235	3876.91	4	3876.9	0.0079	0	12.26	0.059	ELGMoxEEEDVIEVYQEQTGG-LLVHMoxGLLKSEDKVK	K524	2 Oxidation (M)	3877.91	0.00783909	4	CID	0.000597238	3.24839	0.0654024	831.609	1	45/198
			945.28	4721.36	5	4721.36	0.0079	0	31.68	0.00068	IADNHTPKELGMEEEDVIEVYQEQTGG-LLVHMGLLKSEDKVK	K524		4722.36	0.00785669	5	CID	2.49961e-08	5.0973	0.655457	1418.85	1	58/328
			-	-	-	-	-	-	-	-	IADNHTPKELGMEEEDVIEVYQEQTGG-LLVHMGLLKSEDKVK	K524		4722.36	0.00991843	6	CID	0.339968	2.92229	0.853196	941.591	1	60/410
			948.477	4737.35	5	4737.35	-0.0022	0	40.8	8.3e-05	IADNHTPKELGMoxEEEDVIEVYQEQTGG-LLVHMGLLKSEDKVK	K524	Oxidation (M)	4738.36	-0.00225607	5	CID	4.3987e-06	5.62221	0.371604	1592.12	1	65/328
			-	-	-	-	-	-	-	-	IADNHTPKELGMoxEEEDVIEVYQEQTGG-LLVHMGLLKSEDKVK	K524	Oxidation (M)	4738.36	0.0140269	6	CID	0.000243329	2.12076	0.523388	851.647	1	62/410
			677.772	4737.35	7	4737.35	0.0016	0	3.36	0.46	IADNHTPKELGMoxEEEDVIEVYQEQTGG-LLVHMGLLKSEDKVK	K524	Oxidation (M)	4738.36	0.00156225	7	CID	7.67737e-07	2.84212	0.694952	1417.23	1	80/492
			1189.34	4753.35	4	4753.35	0.0022	0	23.26	0.0047	IADNHTPKELGMoxEEEDVIEVYQEQTGG-LLVHMoxGLLKSEDKVK	K524	2 Oxidation (M)	4754.35	0.00217099	4	CID	0.00310965	5.21575	0.673207	486.879	1	46/246
			951.677	4753.35	5	4753.35	0.0038	0	23.44	0.0045	IADNHTPKELGMoxEEEDVIEVYQEQTGG-LLVHMoxGLLKSEDKVK	K524	2 Oxidation (M)	4754.35	0.00380549	5	CID	8.43574e-08	5.34978	0.733726	827.896	1	62/328
			-	-	-	-	-	-	-	-	IADNHTPKELGMoxEEEDVIEVYQEQTGG-LLVHMoxGLLKSEDKVK	K524	2 Oxidation (M)	4754.35	0.0126421	6	CID	0.999989	2.03451	0.54911	828.83	2	57/410
12
	P46060	RanGAP1	773.19	3860.91	5	3860.91	0.0064	0	9.53	0.11	ELGMoxEEEDVIEVYQEQTGG-LLVHMGLLKSEDKVK	K524	Oxidation (M)	3861.91	0.00634171	5	CID	0.146221	3.21032	0.127392	1207.98	1	59/264
			970.236	3876.92	4	3876.9	0.0149	0	4.41	0.36	ELGMoxEEEDVIEVYQEQTGG-LLVHMoxGLLKSEDKVK	K524	2 Oxidation (M)	3877.91	0.0149192	4	CID	0.0782423	2.98584	0.000808543	590.942	1	38/198
			951.681	4753.37	5	4753.35	0.024	0	26.64	0.0022	IADNHTPKELGMoxEEEDVIEVYQEQTGG-LLVHMoxGLLKSEDKVK	K524	2 Oxidation (M)	4754.35	0.0239471	5	CID	7.15058e-09	6.10297	0.00597405	977.632	1	63/328
	P63165	SUMO1	1006.8	3017.38	3	3017.37	0.0075	0	79.27	1.2e-08	ELGMoxEEEDVIEVYQEQTGG-KEGEYIK	K17	Oxidation (M)	3018.38	0.00745824	3	CID	0.000772627	4.89602	0.0180402	1018.38	9	29/100
			1006.8	3017.37	3	3017.37	0.002	0	60.43	9.1e-07	ELGMoxEEEDVIEVYQEQTGG-KEGEYIK	K17	Oxidation (M)	3018.38	0.00196508	3	CID	0.000375061	4.5081	0.0337899	781.172	20	26/100
			1006.8	3017.37	3	3017.37	0.0026	0	54.41	3.6e-06	ELGMoxEEEDVIEVYQEQTGG-KEGEYIK	K17	Oxidation (M)	3018.38	0.00251439	3	CID	0.00130172	4.60381	0.0143452	797.793	10	27/100
			1001.46	3001.37	3	3001.38	-0.0061	0	53.32	4.7e-06	ELGMEEEDVIEVYQEQTGG-KEGEYIK	K17		3002.38	-0.00617168	3	CID	0.000140824	3.57369	0.0463168	501.33	13	24/100
	P61956	SUMO2	937.441	3745.74	4	3745.73	0.0088	0	14.36	0.037	ELGMEEEDVIEVYQEQTGG-EGVKTENNDHINLK	K11		3746.73	0.00880495	4	CID	0.934405	4.07315	0.0224424	677.234	13	38/192
			1254.92	3761.74	3	3761.72	0.0155	0	79.5	1.1e-08	ELGMoxEEEDVIEVYQEQTGG-EGVKTENNDHINLK	K11	Oxidation (M)	3762.73	0.0154293	3	CID	0.975092	4.49561	0.174608	737.891	1	30/128
			941.438	3761.72	4	3761.72	0.0027	0	52.18	6.1e-06	ELGMoxEEEDVIEVYQEQTGG-EGVKTENNDHINLK	K11	Oxidation (M)	3762.73	0.00265948	4	CID	1	5.26652	0.0763348	1068.24	3	43/192
			941.438	3761.72	4	3761.72	0.0002	0	33.57	0.00044	ELGMoxEEEDVIEVYQEQTGG-EGVKTENNDHINLK	K11	Oxidation (M)	3762.73	0.000218076	4	CID	1	4.86836	0.0581119	1213.58	3	44/192
			928.643	4638.18	5	4638.17	0.0104	0	32.35	0.00058	IADNHTPKELGMoxEEEDVIEVYQEQTGG-EGVKTENNDHINLK	K11	Oxidation (M)	4639.18	0.00882389	5	CID	0.00076	5.034	0.036	1157.8	13	53/320
	Q9HCK8	Chromodomain-helicase-DNA-binding protein 8	-	-	-	-	-	-	-	-	ELGMoxEEEDVIEVYQEQTGG-YTEDLDIKITDDEEEEEVDVTGPIK	K592	Oxidation (M)	5047.27	-0.000455929	5	CID	1	2.92049	0.0553945	542.068	8	46/344
			-	-	-	-	-	-	-	-	ELGMoxEEEDVIEVYQEQTGG-YTEDLDIKITDDEEEEEVDVTGPIK	K592	Oxidation (M)	5047.27	-0.00106628	5	CID	1	4.01892	0.0793673	764.101	2	51/344
	Q14204	Cytoplasmic dynein 1 heavy chain 1	935.452	3737.78	4	3737.78	-0.0046	0	20.56	0.0088	ELGMoxEEEDVIEVYQEQTGG-KIKETVDQVEELR	K3207	Oxidation (M)	3738.79	-0.00554794	4	CID	0.00035	4.21	0.14	938.7	12	42/186
SUMO2 conjugated to SUMO2	P61956	SUMO2	1096.71	5478.51	5	5478.51	0.0058	0	21.84	0.0065	FRFDGQPINETDTPAQLEMoxEDEDTIDVFQQQTGG-EGVKTENNDHINLK	K11	Oxidation (M)	5479.51	0.0058064	5	CID	0.466554	5.11943	0.0488642	974.207	38	51/376
			1370.64	5478.54	4	5478.51	0.0337	0	37.99	0.00016	FRFDGQPINETDTPAQLEMoxEDEDTIDVFQQQTGG-EGVKTENNDHINLK	K11	Oxidation (M)	5479.51	0.0337129	4	CID	9.03123e-07	7.31106	0.0662375	2044.38	2	52/282
11	P46060	RanGAP1	773.192	3860.93	5	3860.91	0.0189	0	3.97	0.4	ELGMoxEEEDVIEVYQEQTGG-LLVHMGLLKSEDKVK	K524	Oxidation (M)	3861.91	0.0188539	5	CID	0.765011	2.56741	0.411342	605.441	2	49/264
			970.237	3876.92	4	3876.9	0.0164	0	17.77	0.017	ELGMoxEEEDVIEVYQEQTGG-LLVHMoxGLLKSEDKVK	K524	2 Oxidation (M)	3877.91	0.016384	4	CID	0.000570299	2.90569	0.202404	530.206	1	37/198
			951.681	4753.37	5	4753.35	0.0237	0	49.55	1.1e-05	IADNHTPKELGMoxEEEDVIEVYQEQTGG-LLVHMoxGLLKSEDKVK	K524	2 Oxidation (M)	4754.35	0.0236419	5	CID	1.10606e-06	5.14615	0.118038	1191.02	2	66/328
	P61956	SUMO2	941.445	3761.75	4	3761.72	0.0298	0	3.7		ELGMoxEEEDVIEVYQEQTGG-EGVKTENNDHINLK	K11	Oxidation (M)	3762.73	0.0297591	4	CID	1	4.2694	0.108688	1313.11	4	41/192
			928.65	4638.21	5	4638.17	0.0449	0	27.3	0.0019	IADNHTPKELGMoxEEEDVIEVYQEQTGG-EGVKTENNDHINLK	K11	Oxidation (M)	-	-	-	-	-	-	-	-	-	-
10	P46060	RanGAP1	970.238	3876.92	4	3876.9	0.0215	0	4.81	0.33	ELGMoxEEEDVIEVYQEQTGG-LLVHMoxGLLKSEDKVK	K524	2 Oxidation (M)	3877.91	0.021511	4	CID	1	2.72308	0.0442172	588.965	1	40/198
9	P63165	SUMO1	1001.47	3001.38	3	3001.38	0.0082	0	64.87	3.3e-07	ELGMEEEDVIEVYQEQTGG-KEGEYIK	K17		3002.38	0.00811055	3	CID	0.000127034	3.8735	0.0413216	993.364	1	29/100
			1006.8	3017.38	3	3017.37	0.0066	0	92.87	5.2e-10	ELGMoxEEEDVIEVYQEQTGG-KEGEYIK	K17	Oxidation (M)	3018.38	0.00654271	3	CID	0.000937836	5.59832	0.0111961	1536.71	5	34/100
	P46060	RanGAP1	773.188	3860.9	5	3860.91	-0.0019	0	2.87	0.52	ELGMoxEEEDVIEVYQEQTGG-LLVHMGLLKSEDKVK	K524	Oxidation (M)	3861.91	-0.00189803	5	CID	1	2.47035	0.0604328	727.105	3	49/264
7	P46060	RanGAP1	966.24	3860.93	4	3860.91	0.0235	0	5.01	0.32	ELGMoxEEEDVIEVYQEQTGG-LLVHMGLLKSEDKVK	K524	Oxidation (M)	3861.91	0.023506	4	CID	2.67212e-07	3.74421	0.203932	779.754	1	43/198
			970.236	3876.91	4	3876.9	0.0137	0	13.65	0.043	ELGMoxEEEDVIEVYQEQTGG-LLVHMoxGLLKSEDKVK	K524	2 Oxidation (M)	3877.91	0.0136985	4	CID	0.0131201	3.03406	0.118176	798.583	2	43/198
4	P46060	RanGAP1	-	-	-	-	-	-	-	-	ELGMoxEEEDVIEVYQEQTGG-LLVHMGLLKSEDKVK	K524	Oxidation (M)	3861.91	0.0210646	4	CID	1	2.52142	0.186129	426.826	2	33/198
			970.238	3876.92	4	3876.9	0.0201	0	6.99	0.2	ELGMoxEEEDVIEVYQEQTGG-LLVHMoxGLLKSEDKVK	K524	2 Oxidation (M)	3877.91	0.0200461	4	CID	0.999193	2.28437	0.150637	408.969	1	33/198
1	P49748	Very long-chain specific acyl-CoA dehydrogenase	992.456	2974.35	3	2974.38	-0.0297	0	46.13	2.4e-05	ELGMoxEEEDVIEVYQEQTGG-NFKSISK	K635	Oxidation (M)	-	-	-	-	-	-	-	-	-	-
10	P46060	RanGAP1	1217.59	3649.76	3	3649.74	0.02	0	62.71	5.4e-07	ELGMoxEEEDVIEVYQEQTGG-LLVHMoxGLLKSEDK	K524	2 Oxidation (M)	3650.75	0.0199887	3	CID	3.73131e-05	5.44413	0.0324074	1019.13	2	33/124
			1287.98	3860.92	3	3860.91	0.0163	0	70.29	9.4e-08	ELGMoxEEEDVIEVYQEQTGG-LLVHMGLLKSEDKVK	K524	Oxidation (M)	3861.91	0.0162451	3	CID	1.1376e-06	5.02293	0.0809728	802.63	1	33/132
			970.237	3876.92	4	3876.9	0.0177	0	15.16	0.03	ELGMoxEEEDVIEVYQEQTGG-LLVHMoxGLLKSEDKVK	K524	2 Oxidation (M)	3877.91	0.0176281	4	CID	0.0641207	3.41663	0.258866	752.879	1	41/198
			1189.35	4753.38	4	4753.35	0.0307	0	27.2	0.0019	IADNHTPKELGMoxEEEDVIEVYQEQTGG-LLVHMoxGLLKSEDKVK	K524	2 Oxidation (M)	4754.35	0.030715	4	CID	1.65497e-05	6.06891	0.187788	434.75	1	45/246
	P63165	SUMO1	1006.8	3017.38	3	3017.37	0.0073	0	55.17	3e-06	ELGMoxEEEDVIEVYQEQTGG-KEGEYIK	K17	Oxidation (M)	3018.38	0.0072367	3	CID	0.0018592	5.11148	0.0340201	1305.72	3	33/100
			1006.8	3017.38	3	3017.37	0.0105	0	46.81	2.1e-05	ELGMoxEEEDVIEVYQEQTGG-KEGEYIK	K17	Oxidation (M)	3018.38	0.0104739	3	CID	0.000377288	4.54882	0.0591125	819.11	8	26/100
	P61956	SUMO2	1254.92	3761.73	3	3761.72	0.0074	0	62.72	5.3e-07	ELGMoxEEEDVIEVYQEQTGG-EGVKTENNDHINLK	K11	Oxidation (M)	3762.73	0.00739833	3	CID	1	5.57169	0.114325	1162.14	1	33/128
9	P63165	SUMO1	1006.8	3017.38	3	3017.37	0.0088	0	50.24	9.5e-06	ELGMoxEEEDVIEVYQEQTGG-KEGEYIK	K17	Oxidation (M)	3018.38	0.00874666	3	CID	0.000384604	3.91951	0.0839166	856.165	5	28/100
	P07814	Bifunctional aminoacyl-tRNA synthetase	1314.6	3940.77	3	3940.77	0.0014	0	51.7	6.8e-06	ELGMoxEEEDVIEVYQEQTGG-NPIEKNLQMWEEMK	K318	Oxidation (M)	-	-	-	-	-	-	-	-	-	-
8	P63165	SUMO1	1006.8	3017.39	3	3017.37	0.0152	0	34.22	0.00038	ELGMoxEEEDVIEVYQEQTGG-KEGEYIK	K17	Oxidation (M)	3018.38	0.0151906	3	CID	1	4.84415	0.0696213	783.652	3	28/100
7	P46060	RanGAP1	-	-	-	-	-	-	-	-	ELGMoxEEEDVIEVYQEQTGG-LLVHMGLLKSEDKVK	K524	Oxidation (M)	3861.91	0.0206252	4	CID	1	1.87332	0.242178	270.916	4	28/198
5	P63279	SUMO-conjugating enzyme UBC9	992.458	2974.35	3	2974.34	0.0137	0	59.84	1e-06	ELGMoxEEEDVIEVYQEQTGG-VEYEKR	K146	Oxidation (M)	2975.35	0.0136446	3	CID	0.000312746	5.18206	0.0531364	1723.58	2	34/96
	P46060	RanGAP1	-	-	-	-	-	-	-	-	ELGMoxEEEDVIEVYQEQTGG-LLVHMoxGLLKSEDKVK	K524	2 Oxidation (M)	3877.91	0.00636403	4	CID	1	2.97531	0.0509317	712.995	1	41/198
12	P49792	E3 SUMO-protein ligase RanBP2	876.408	2626.2	3	2626.2	0.0077	0	23.58	0.0044	ELGMoxEEEDVIEVYQEQTGG-AKEK	K2618	Oxidation (M)	2627.2	0.0077	3	CID	0.3	2.939	0.088	689.5	4	24/88
			943.782	2828.32	3	2828.32	0.0059	0	35.55	0.00028	ELGMoxEEEDVIEVYQEQTGG-KNLFR	K2255	Oxidation (M)	2829.3	0.0059	3	CID	0.025	2.858	0.072	399.7	8	22/92
			1019.17	3054.49	3	3054.47	0.0108	0	36.53	0.00022	ELGMoxEEEDVIEVYQEQTGG-FALVTPKK	K1414	Oxidation (M)	3055.48	0.0107631	3	CID	0.0163311	4.22399	0.0118285	789.298	3	29/104
			1100.49	3298.46	3	3298.45	0.0054	0	106.23	2.4e-11	ELGMoxEEEDVIEVYQEQTGG-SGFEGMoxFTKK	K1723	2 Oxidation (M)	3299.46	0.00543648	3	CID	0.000235216	5.45763	0.0294797	1067.59	4	32/112
			1100.5	3298.47	3	3298.45	0.0155	0	72.02	6.3e-08	ELGMoxEEEDVIEVYQEQTGG-SGFEGMoxFTKK	K1723	2 Oxidation (M)	3299.46	0.0155368	3	CID	6.74338e-06	5.29055	0.015531	1220.23	1	33/112
			876.669	3502.65	4	3502.64	0.0075	0	44.6	3.5e-05	IADNHTPKELGMoxEEEDVIEVYQEQTGG-AKEK	K2618	Oxidation (M)	3503.65	0.00748351	4	CID	4.40348e-05	6.21909	0.0247742	1255.62	3	44/180
			895.179	3576.69	4	3576.68	0.0041	0	22.33	0.0058	ELGMoxEEEDVIEVYQEQTGG-FKLQDVADSFKK	K2425	Oxidation (M)	3577.69	0.0040985	4	CID	0.0014724	3.82878	0.104993	849.857	2	35/180
			1193.24	3576.69	3	3576.68	0.0112	0	94.41	3.6e-10	ELGMoxEEEDVIEVYQEQTGG-FKLQDVADSFKK	K2425	Oxidation (M)	3577.69	0.011141	3	CID	3.19973e-05	5.119	0.0869934	820.849	1	28/120
			1196.88	3587.61	3	3587.59	0.0172	0	97.71	1.7e-10	ELGMoxEEEDVIEVYQEQTGG-NSDIEQSSDSKVK	K2592	Oxidation (M)	3588.6	0.0171655	3	CID	1.09386e-05	6.5693	0.10291	1426.76	7	37/124
			1196.88	3587.61	3	3587.59	0.0172	0	35.58	0.00028	ELGMoxEEEDVIEVYQEQTGG-NSDIEQSSDSKVK	K2592	Oxidation (M)	-	-	-	-	-	-	-	-	-	-
			1277.29	3828.84	3	3828.83	0.0148	0	29.65	0.0011	ELGMoxEEEDVIEVYQEQTGG-AVVSPPKFVFGSESVK	K2513	Oxidation (M)	3829.84	0.0147697	3	CID	0.0721403	2.58687	0.121092	190.469	4	21/136
			1117.02	4464.03	4	4464.04	-0.0068	0	50.17	9.6e-06	IADNHTPKELGMoxEEEDVIEVYQEQTGG-NSDIEQSSDSKVK	K2592	Oxidation (M)	4465.08	-0.0068	4	CID	0.00011	5.323	0.073	1718.31	1	48/234
			1117.02	4464.05	4	4464.04	0.0111	0	63.04	5e-07	IADNHTPKELGMoxEEEDVIEVYQEQTGG-NSDIEQSSDSKVK	K2592	Oxidation (M)	4465.05	0.0110808	4	CID	0.000683535	6.51338	0.00681267	1587.6	5	47/234
			1395.41	5577.62	4	5577.67	-0.0504	0	14.31	0.037	IADNHTPKELGMoxEEEDVIEVYQEQTGG-IAELLCamKNDVTDGRAKYWLER	-	Carbamidomethyl (C); Oxidation (M)	5578.6	0.0230076	4	CID	0.0153613	4.33842	0.0027973	261.029	8	36/288
	Q7Z3J3	RANBP2-like and GRIP domain-containing protein 4	1443.31	4326.91	3	4326.88	0.0286	0	7.29	0.19	ELGMoxEEEDVIEVYQEQTGG-KAEDIANDALSPEEQEECamK	K691	Carbamidomethyl (C); Oxidation (M)	-	-	-	-	-	-	-	-	-	-
			1301.85	5203.37	4	5203.32	0.0428	0	4.58	0.35	IADNHTPKELGMoxEEEDVIEVYQEQTGG-KAEDIANDALSPEEQEECamK	K691	Carbamidomethyl (C); Oxidation (M)	-	-	-	-	-	-	-	-	-	-
	P63165	SUMO1	1006.8	3017.37	3	3017.37	0.0034	0	67.43	1.8e-07	ELGMoxEEEDVIEVYQEQTGG-KEGEYIK	K17	Oxidation (M)	3018.38	0.0127958	3	CID	0.000315003	5.40311	0.00966661	1093.82	3	30/100
			1006.8	3017.38	3	3017.37	0.0128	0	68.35	1.5e-07	ELGMoxEEEDVIEVYQEQTGG-KEGEYIK	K17	Oxidation (M)	3018.38	0.00339408	3	CID	0.00112524	4.61477	0.0146042	950.219	3	28/100
	P61956	SUMO2	1160.56	4638.19	4	4638.17	0.0272	0	40.48	9e-05	IADNHTPKELGMoxEEEDVIEVYQEQTGG-EGVKTENNDHINLK	K11	Oxidation (M)	4639.17	0.0271986	4	CID	1.64396e-05	5.28133	0.130449	864.743	1	42/240
			941.443	3761.74	4	3761.72	0.0201	0	8.23	0.15	ELGMoxEEEDVIEVYQEQTGG-EGVKTENNDHINLK	K11	Oxidation (M)	3762.73	0.0200207	4	CID	0.23651	3.04824	0.136315	539.142	4	32/192
			1254.92	3761.74	3	3761.72	0.0231	0	50.23	9.5e-06	ELGMoxEEEDVIEVYQEQTGG-EGVKTENNDHINLK	K11	Oxidation (M)	3762.73	0.0230872	3	CID	0.0913252	4.87106	0.175616	904.091	1	32/128
	P46060	RanGAP1	-	-	-	-	-	-	-	-	ELGMoxEEEDVIEVYQEQTGG-LLVHMoxGLLKSEDKVK	K524	2 Oxidation (M)	3877.91	0.0264636	4	CID	0.0148131	2.63232	0.339683	456.514	1	35/198
SUMO2 conjugated to SUMO2	P61956	SUMO2	1370.64	5478.52	4	5478.51	0.0125	0	19.59	0.011	FRFDGQPINETDTPAQLEMoxEDEDTIDVFQQQTGG-EGVKTENNDHINLK	K11	Oxidation (M)	5479.51	0.0125146	4	CID	1	5.05213	0.00417379	1088.75	4	47/282
11	P46060	RanGAP1	-	-	-	-	-	-	-	-	ELGMoxEEEDVIEVYQEQTGG-LLVHMoxGLLKSEDKVK	K524	2 Oxidation (M)	3877.91	0.00945028	4	CID	1	2.61662	0.00732876	501.832	1	35/198
10	P46060	RanGAP1	1293.31	3876.92	3	3876.9	0.0187	0	34.35	0.00037	ELGMoxEEEDVIEVYQEQTGG-LLVHMoxGLLKSEDKVK	K524	2 Oxidation (M)	3877.91	0.0187031	3	CID	0.00116875	4.11395	0.29152	352.394	1	23/132
			1189.35	4753.37	4	4753.35	0.0216	0	9.69	0.11	IADNHTPKELGMoxEEEDVIEVYQEQTGG-LLVHMoxGLLKSEDKVK	K524	2 Oxidation (M)	4754.35	0.0215222	4	CID	0.000261492	3.80737	0.461348	393.289	1	40/246
			-	-	-	-	-	-	-	-	ELGMoxEEEDVIEVYQEQTGG-LLVHMoxGLLKSEDKVK	K524	2 Oxidation (M)	3877.91	0.00453288	4	CID	0.014913	2.99828	0.259893	615.671	1	37/198
9	P46060	RanGAP1	913.441	3649.74	4	3649.74	-0.0022	0	0.65	0.86	ELGMoxEEEDVIEVYQEQTGG-LLVHMoxGLLKSEDK	K524	2 Oxidation (M)	3650.75	-0.00223145	4	CID	0.75074	2.03815	0.212093	424.487	7	28/186
			1293.31	3876.92	3	3876.9	0.0161	0	53.71	4.3e-06	ELGMoxEEEDVIEVYQEQTGG-LLVHMoxGLLKSEDKVK	K524	2 Oxidation (M)	3877.91	0.0161147	3	CID	2.16022e-07	4.29843	0.41857	256.35	1	23/132
			1189.35	4753.37	4	4753.35	0.0192	0	27.14	0.0019	IADNHTPKELGMoxEEEDVIEVYQEQTGG-LLVHMoxGLLKSEDKVK	K524	2 Oxidation (M)	4754.35	0.01917	4	CID	0.00111549	5.04378	0.553571	316.979	1	37/246
6	P46060	RanGAP1	970.236	3876.91	4	3876.9	0.0125	0	4.44	0.36	ELGMoxEEEDVIEVYQEQTGG-LLVHMoxGLLKSEDKVK	K524	2 Oxidation (M)	3877.91	0.0125011	4	CID	1	2.8051	0.196972	565.029	2	38/198
			1189.35	4753.38	4	4753.35	0.0297	0	25.53	0.0028	IADNHTPKELGMoxEEEDVIEVYQEQTGG-LLVHMoxGLLKSEDKVK	K524	2 Oxidation (M)	4754.35	0.0296492	4	CID	0.985408	5.89249	0.0561377	513.923	1	45/246
5	P46060	RanGAP1	1189.36	4753.39	4	4753.35	0.0467	0	19.85	0.01	IADNHTPKELGMoxEEEDVIEVYQEQTGG-LLVHMoxGLLKSEDKVK	K524	2 Oxidation (M)	4754.35	0.0466757	4	CID	1.61878e-07	5.33273	0.121118	505.957	1	43/246
4	P46060	RanGAP1	970.236	3876.92	4	3876.9	0.0151	0	5.86	0.26	ELGMoxEEEDVIEVYQEQTGG-LLVHMoxGLLKSEDKVK	K524	2 Oxidation (M)	3877.91	0.0150526	4	CID	1	2.89794	0.177909	532.708	1	36/198
			1189.35	4753.37	4	4753.35	0.0226	0	13.8	0.042	IADNHTPKELGMoxEEEDVIEVYQEQTGG-LLVHMoxGLLKSEDKVK	K524	2 Oxidation (M)	4754.35	0.0225246	4	CID	1	4.41351	0.145059	500.891	2	41/246
3	P46060	RanGAP1	1189.35	4753.38	4	4753.35	0.0307	0	16.36	0.023	IADNHTPKELGMoxEEEDVIEVYQEQTGG-LLVHMoxGLLKSEDKVK	K524	2 Oxidation (M)	4754.35	0.0306728	4	CID	1	4.52395	0.279658	325.579	1	37/246
		Summon						ChopNSpice
Sample	Filename	protein	peptide	charge	scan#	mod score		Accession number	protein	Mascot Score	SUMO sequence	Position	Modification	Charge
Endogenous IP-SUMO1 assay (CID MS/MS scan in LTQ, Figure 5)	IP_SUMO1_1	nd	-	-	-			P49748	Very long-chain specific acyl-CoA dehydrogenase	46.1	ELGMoxEEEDVIEVYQEQTGG-NFKSISK	K635	Oxidation (M)	3
Endogenous IP-SUMO1 assay (CID MS/MS scan in LTQ, Figure 5)	IP_SUMO1_H_9_Recal	nd	-	-	-			P46060	RanGAP1_Human	53.7	ELGMoxEEEDVIEVYQEQTGG-LLVHMoxGLLKSEDKVK	K524	2 Oxidation (M)	4
										271	IADNHTPKELGMoxEEEDVIEVYQEQTGG-LLVHMoxGLLKSEDKVK	K524	2 Oxidation (M)	4
In vitro SUMO1 conjugated to mouse RanGAP1 assay (CID MS/MS scan in LTQ, Figure 3A )	RanGAP1_SUMO1	RanGAP1	LLIHMGLLK*SEDK	4+	3765	1		P46061	RanGAP1_Mouse	18.6	ELGMEEEDVIEVYQEQTGG-LLIHMGLLKSEDK	K526		4
		RanGAP1	LLIHMGLLK*SEDK	4+	2762	1				46.3	ELGMEEEDVIEVYQEQTGG-LLIHMGLLKSEDK	K526		4
		RanGAP1	LLIHMGLLK*SEDK	3+	2769	1				90	ELGMEEEDVIEVYQEQTGG-LLIHMGLLKSEDK	K526		3
		RanGAP1	LLIHMGLLK*SEDK	5+	2775	0.867				47.3	ELGMoxEEEDVIEVYQEQTGG-LLIHMGLLKSEDK	K526	Oxidation (M)	4
		RanGAP1	LLIHMGLLK*SEDK	4+	2732	1	oxidized M in SUMO-1 tail			85.3	ELGMoxEEEDVIEVYQEQTGG-LLIHMGLLKSEDK	K526	Oxidation (M)	3
		RanGAP1	LLIHMGLLK*SEDK	3+	2733	1	oxidized M in SUMO-1 tail			32.8	ELGMEEEDVIEVYQEQTGG-LLIHMGLLKSEDK	K526		4
		RanGAP1	LLIHMGLLK*SEDK	4+	2561	0.886	oxidized M in SUMO-1 tail			110.3	ELGMEEEDVIEVYQEQTGG-LLIHMGLLKSEDK	K526		3
		RanGAP1	LLIHMGLLK*SEDK	3+	2563	0.881	oxidized M in SUMO-1 tail			0.5	ELGMEEEDVIEVYQEQTGG-LLIHMGLLKSEDKIK	K526		5
		RanGAP1	LLIHMGLLK*SEDK	3+	2740	1	dioxidized M in SUMO-1 tail			4.9	ELGMEEEDVIEVYQEQTGG-LLIHMGLLKSEDKIK	K526		4
		RanGAP1	LLIHMGLLK*SEDK	4+	2735	1	dioxidized M in SUMO-1 tail			56.4	ELGMEEEDVIEVYQEQTGG-LLIHMGLLKSEDKIK	K526		3
		RanGAP1	LLIHMGLLK*SEDK	3+	2531	0.875	dioxidized M in SUMO-1 tail			21.5	ELGMoxEEEDVIEVYQEQTGG-LLIHMGLLKSEDKIK	K526	Oxidation (M)	5
										5.5	ELGMoxEEEDVIEVYQEQTGG-LLIHMGLLKSEDKIK	K526	Oxidation (M)	4
										30.8	ELGMoxEEEDVIEVYQEQTGG-LLIHMGLLKSEDKIK	K526	Oxidation (M)	3
										8.7	ELGMoxEEEDVIEVYQEQTGG-LLIHMoxGLLKSEDKIK	K526	2 Oxidation (M)	5
										8.8	ELGMoxEEEDVIEVYQEQTGG-LLIHMoxGLLKSEDKIK	K526	2 Oxidation (M)	3
In vitro SUMO2 conjugeated to uba2 assay (CID MS/MS scan in LTQ)	Uba2_SUMO2_8	SAE2	ASNEDGDIK*R	3+	2409	1		Q9UBT2	SUMO-activating enzyme subunit 2	113.3	FDGQPINETDTPAQLEMEDEDTIDVFQQQTGG-ASNEDGDIKR	K236		3
		SAE2	ASNEDGDIK*R	4+	2415	1				74.4	FDGQPINETDTPAQLEMEDEDTIDVFQQQTGG-ASNEDGDIKR	K236		4
										63.4	FDGQPINETDTPAQLEMoxEDEDTIDVFQQQTGG-ASNEDGDIKR	K236	Oxidation (M)	3
										152.3	FRFDGQPINETDTPAQLEMEDEDTIDVFQQQTGG-ASNEDGDIKR	K236		4
										66.2	FRFDGQPINETDTPAQLEMoxEDEDTIDVFQQQTGG-ASNEDGDIKR	K236	Oxidation (M)	4
In vitro SUMO2 conjugeated to uba2 assay (HCD MS/MS scan in Orbitrap)	Ubc2_SUMO2_HCD_7	nd	-	-	-			Q9UBT2	SUMO-activating enzyme subunit 2	14.3	FDGQPINETDTPAQLEMEDEDTIDVFQQQTGG-ASNEDGDIKR	K236		3
										41,3	FDGQPINETDTPAQLEMoxEDEDTIDVFQQQTGG-ASNEDGDIKR	K236	Oxidation (M)	3
										118.7	FRFDGQPINETDTPAQLEMEDEDTIDVFQQQTGG-ASNEDGDIKR	K236		4
										84.8	FRFDGQPINETDTPAQLEMoxEDEDTIDVFQQQTGG-ASNEDGDIKR	K236	Oxidation (M)	4
	nd = no conjugation sites detected

## Sheet: Gallison
UniProt ID	Protein Description	Peptide Sequence	Pep Modification	Pep Score	Pep Rank	Pep Observed Mz	Pep Calc Mass	Peptide Observed Mass	Peptide Charge	Pep Elution Time	AS		UniProt ID	Protein Description	Peptide Sequence	Pep Modification	Pep Score	Pep Rank	Pep Observed Mz	Pep Calc Mass	Peptide Observed Mass	Peptide Charge	Pep Elution Time
IPI00171626	1-acylglycerophosphocholine O-acyltransferase 1	AAPASSAGASDAR		87.57	1	566.273	1130.53	1130.53	2	17.38			IPI00171626	1-acylglycerophosphocholine O-acyltransferase 1	AAPASSAGASDAR		73.76	1	566.273	1130.53	1130.53	2	17.87
IPI00171626	1-acylglycerophosphocholine O-acyltransferase 1	TALGVAELTVTDLFR		114.13	1	803.447	1604.88	1604.88	2	67.31			IPI00171626	1-acylglycerophosphocholine O-acyltransferase 1	ITFADFHR		35.78	1	336.175	1005.5	1005.5	3	42.11
IPI00171626	1-acylglycerophosphocholine O-acyltransferase 1	TLDTIQLAFK		50.62	1	575.33	1148.64	1148.64	2	50.02			IPI00171626	1-acylglycerophosphocholine O-acyltransferase 1	TALGVAELTVTDLFR		89.95	1	803.447	1604.88	1604.88	2	67.3
IPI00790251	104 kDa protein	AGEEGPRPTK		55.17	1	521.269	1040.53	1040.52	2	16.23			IPI00790251	104 kDa protein	AGEEGPRPTK		30.82	1	347.849	1040.53	1040.53	3	16.4
IPI00790251	104 kDa protein	ALLAAPR		27.33	1	356.229	710.444	710.444	2	34.58			IPI00790251	104 kDa protein	ASGPHGAFNGNCEAK	Carbamidomethyl (C)-C12	66.05	1	758.834	1515.65	1515.65	2	26.15
IPI00790251	104 kDa protein	DASLQPPERLEHR		33.17	1	774.4	1546.79	1546.79	2	32.96			IPI00790251	104 kDa protein	DASLQPPERLEHR		38.52	1	387.704	1546.79	1546.79	4	33.28
IPI00790251	104 kDa protein	EEKDRDLPFSRPQLR		16.12	1	629.333	1884.98	1884.98	3	37.79			IPI00790251	104 kDa protein	ESPGAPPAFASPPDPWGR		53.48	1	918.442	1834.86	1834.87	2	47.99
IPI00790251	104 kDa protein	ESPGAPPAFASPPDPWGR		45.49	1	918.443	1834.86	1834.87	2	47.71			IPI00790251	104 kDa protein	FYEAGEELTGPGAVAAAR		134.7	1	904.946	1807.87	1807.88	2	42.26
IPI00790251	104 kDa protein	FYEAGEELTGPGAVAAAR		125.51	1	904.946	1807.87	1807.88	2	42.1			IPI00790251	104 kDa protein	LGPVPSGLSQK		56.88	1	541.814	1081.61	1081.61	2	36.88
IPI00790251	104 kDa protein	LGPVPSGLSQK		68.33	1	541.817	1081.61	1081.62	2	36.77			IPI00790251	104 kDa protein	MEGLFR		28.13	1	376.692	751.369	751.37	2	42.49
IPI00790251	104 kDa protein	LYGLEPAHPLLYSR		84.47	1	814.952	1627.87	1627.89	2	46.92			IPI00790251	104 kDa protein	REPSITKEEKDR		53.35	1	496.598	1486.77	1486.77	3	22.76
IPI00790251	104 kDa protein	MEGLFR		42.94	1	376.693	751.369	751.37	2	42.16			IPI00790251	104 kDa protein	REPSITKEEKDRDLPFSRPQLR		30.32	1	899.821	2696.44	2696.44	3	37.75
IPI00790251	104 kDa protein	MKGDSHKLDFR		57.72	1	334.173	1332.66	1332.66	4	30.13			IPI00790251	104 kDa protein	RGGSSGATGEPGDSSDREPGRPPGDR		22.19	1	639.296	2553.16	2553.15	4	24.4
IPI00790251	104 kDa protein	REPSITKEEK		33.79	1	608.83	1215.65	1215.65	2	22.23			IPI00790251	104 kDa protein	RGPGGDAPR		29.56	1	441.731	881.447	881.447	2	15.38
IPI00790251	104 kDa protein	REPSITKEEKDR		49.23	1	372.702	1486.77	1486.78	4	22.99			IPI00790251	104 kDa protein	STNPELPPR		29.89	1	505.766	1009.52	1009.52	2	29.84
IPI00790251	104 kDa protein	REPSITKEEKDRDLPFSRPQLR		29.01	1	899.823	2696.44	2696.45	3	37.45			IPI00790251	104 kDa protein	TPGSDKERPVER		15.83	1	685.856	1369.69	1369.7	2	18.88
IPI00790251	104 kDa protein	RGPGGDAPR		39.07	1	441.731	881.447	881.447	2	15.55			IPI00790251	104 kDa protein	VAYMILR		26.36	1	433.252	864.489	864.489	2	44.83
IPI00790251	104 kDa protein	RRGPGGDAPR		17.01	1	346.857	1037.55	1037.55	3	14.94			IPI00790251	104 kDa protein	VSPFGLR		31.04	1	388.228	774.439	774.441	2	42.08
IPI00790251	104 kDa protein	STNPELPPR		36.16	1	505.766	1009.52	1009.52	2	29.68			IPI00003519	116 kDa U5 small nuclear ribonucleoprotein component	AFIPAIDSFGFETDLR		77.09	1	899.955	1797.89	1797.9	2	60.02
IPI00790251	104 kDa protein	TPGSDKERPVER		36.92	1	457.572	1369.69	1369.7	3	18.76			IPI00003519	116 kDa U5 small nuclear ribonucleoprotein component	IAVEPVNPSELPK		29.61	1	696.89	1391.77	1391.77	2	42.95
IPI00790251	104 kDa protein	TSPYGSSLDLSTGSSSRPPPK		19.33	1	707.693	2120.04	2120.06	3	37.37			IPI00003519	116 kDa U5 small nuclear ribonucleoprotein component	ILDAVVAQEPLHR		43.8	1	730.914	1459.81	1459.81	2	41.01
IPI00790251	104 kDa protein	VAYMILR		46.39	1	433.251	864.489	864.488	2	44.56			IPI00003519	116 kDa U5 small nuclear ribonucleoprotein component	YDWDLLAAR		75.53	1	561.778	1121.55	1121.54	2	52.75
IPI00790251	104 kDa protein	VSPFGLR		33.96	1	388.227	774.439	774.44	2	41.72			IPI00027493	4F2 cell-surface antigen heavy chain	FTGLSKEELLK		32.2	1	422.243	1263.71	1263.71	3	41.94
IPI00003519	116 kDa U5 small nuclear ribonucleoprotein component	AFIPAIDSFGFETDLR		91.48	1	899.955	1797.89	1797.9	2	60.18			IPI00027493	4F2 cell-surface antigen heavy chain	GQSEDPGSLLSLFR		30.74	1	753.383	1504.75	1504.75	2	59.63
IPI00003519	116 kDa U5 small nuclear ribonucleoprotein component	FFDDPMLLELAK		64.68	1	719.869	1437.72	1437.72	2	59.65			IPI00027493	4F2 cell-surface antigen heavy chain	IGDLQAFQGHGAGNLAGLK	Deamidation (NQ)-Q5	40.12	1	623.333	1866.96	1866.98	3	46.3
IPI00003519	116 kDa U5 small nuclear ribonucleoprotein component	IAVEPVNPSELPK		45.72	1	696.89	1391.77	1391.77	2	42.77			IPI00027493	4F2 cell-surface antigen heavy chain	IKVAEDEAEAAAAAK		42.66	1	496.263	1485.77	1485.77	3	33.83
IPI00003519	116 kDa U5 small nuclear ribonucleoprotein component	STPVTVVLPDTK		46.92	1	628.859	1255.7	1255.7	2	41.81			IPI00027493	4F2 cell-surface antigen heavy chain	LLTSFLPAQLLR		64.24	1	686.423	1370.83	1370.83	2	61.35
IPI00003519	116 kDa U5 small nuclear ribonucleoprotein component	YDWDLLAAR		63.88	1	561.782	1121.55	1121.55	2	52.54			IPI00465361	60S ribosomal protein L13	AKEAAEQDVEK		77.14	1	609.305	1216.59	1216.59	2	19.84
IPI00021263	14-3-3 protein zeta/delta	LAEQAER		48.25	1	408.714	815.414	815.414	2	18.32			IPI00465361	60S ribosomal protein L13	NKSTESLQANVQR		66.05	1	737.885	1473.75	1473.76	2	28.61
IPI00021263	14-3-3 protein zeta/delta	SVTEQGAELSNEER		75.09	1	774.86	1547.71	1547.71	2	30.63			IPI00470528	60S ribosomal protein L15	FHHTIGGSR		26.59	1	337.843	1010.5	1010.51	3	21.91
IPI00027493	4F2 cell-surface antigen heavy chain	GQSEDPGSLLSLFR		107.43	1	753.384	1504.75	1504.75	2	59.68			IPI00470528	60S ribosomal protein L15	FHHTIGGSRR		21.9	1	584.31	1166.61	1166.61	2	19.22
IPI00027493	4F2 cell-surface antigen heavy chain	IGDLQAFQGHGAGNLAGLK		99.78	1	934	1865.97	1865.99	2	45.96			IPI00470528	60S ribosomal protein L15	GATYGKPVHHGVNQLK		67.76	1	569.308	1704.91	1704.9	3	26.33
IPI00027493	4F2 cell-surface antigen heavy chain	LLTSFLPAQLLR		40.84	1	686.422	1370.83	1370.83	2	61.38			IPI00470528	60S ribosomal protein L15	RNPDTQWITKPVHK		36.03	1	573.98	1718.92	1718.92	3	34.09
IPI00027493	4F2 cell-surface antigen heavy chain	VAEDEAEAAAAAK		93.16	1	623.302	1244.59	1244.59	2	28.33			IPI00470528	60S ribosomal protein L15	VLNSYWVGEDSTYK		16.15	1	830.905	1659.78	1659.79	2	45.04
IPI00465361	60S ribosomal protein L13	AKEAAEQDVEK		91.81	1	609.305	1216.59	1216.59	2	19.65			IPI00025329	60S ribosomal protein L19	KPVTVHSR		20.63	1	308.52	922.535	922.537	3	14.95
IPI00465361	60S ribosomal protein L13	NKSTESLQANVQR		99.17	1	737.884	1473.75	1473.75	2	28.28			IPI00025329	60S ribosomal protein L19	TLSKEEETKK		55.52	1	398.219	1191.63	1191.63	3	15.18
IPI00465361	60S ribosomal protein L13	VITEEEKNFK		47.37	1	618.826	1235.64	1235.64	2	30.56			IPI00025329	60S ribosomal protein L19	VWLDPNETNEIANANSR		103.23	1	971.969	1941.92	1941.92	2	44.3
IPI00470528	60S ribosomal protein L15	FFEVILIDPFHK		15.42	1	502.278	1503.81	1503.81	3	62.11			IPI00878557	62 kDa protein	AEDGFEDQILIPVPAPAGGDDDYIEQTLVTVAAAGK		37.2	1	1229.28	3684.8	3684.81	3	65.08
IPI00470528	60S ribosomal protein L15	FHHTIGGSR		37.99	1	337.843	1010.5	1010.51	3	21.37			IPI00878557	62 kDa protein	AFVESSKLKR		60.38	1	388.897	1163.67	1163.67	3	28.94
IPI00470528	60S ribosomal protein L15	GATYGKPVHHGVNQLK		74.86	1	569.308	1704.91	1704.9	3	26.29			IPI00878557	62 kDa protein	DIDHETVVEEQIIGENSPPDYSEYMTGK		90.02	1	1065.82	3194.42	3194.42	3	49.64
IPI00470528	60S ribosomal protein L15	NTLQLHR		15.62	1	441.251	880.488	880.487	2	28.41			IPI00878557	62 kDa protein	DIDHETVVEEQIIGENSPPDYSEYMTGK	Oxidation (M)-M25	82.71	1	1071.15	3210.42	3210.42	3	46.4
IPI00470528	60S ribosomal protein L15	RNPDTQWITKPVHK		76.27	1	573.981	1718.92	1718.92	3	33.92			IPI00878557	62 kDa protein	DNSAMRK		33.66	1	411.201	820.386	820.387	2	12.38
IPI00025329	60S ribosomal protein L19	TLSKEEETKK		44.47	1	398.219	1191.63	1191.64	3	14.85			IPI00878557	62 kDa protein	DNSAMRK	Oxidation (M)-M5	19.21	1	419.198	836.381	836.381	2	11.87
IPI00025329	60S ribosomal protein L19	VWLDPNETNEIANANSR		109.35	1	971.969	1941.92	1941.92	2	44.31			IPI00878557	62 kDa protein	EEVVGGDDSDGLR		66.56	1	674.305	1346.6	1346.6	2	31.73
IPI00456758	60S ribosomal protein L27a	HYHLKR		23.51	1	427.243	852.472	852.471	2	16.7			IPI00878557	62 kDa protein	FAQSTNLKSHILTHAK		59.1	1	599.336	1794.97	1794.99	3	33.46
IPI00456758	60S ribosomal protein L27a	INFDKYHPGYFGK		67.84	1	793.394	1584.77	1584.77	2	41.54			IPI00878557	62 kDa protein	FSLDFNLR		43.49	1	506.266	1010.52	1010.52	2	53.5
IPI00456758	60S ribosomal protein L27a	LRGHVSHGHGR		45.13	1	606.827	1211.64	1211.64	2	11.98			IPI00878557	62 kDa protein	HLHTHGPR		53.99	1	477.754	953.494	953.494	2	12.09
IPI00456758	60S ribosomal protein L27a	NKTGAAPIIDVVR		60.33	1	677.395	1352.78	1352.78	2	41.46			IPI00878557	62 kDa protein	HQLVHTGEKPFQCTFEGCGK	Carbamidomethyl (C)-C13|Carbamidomethyl (C)-C18	67.71	1	787.368	2359.08	2359.08	3	37.52
IPI00456758	60S ribosomal protein L27a	VGMKHYHLK	Oxidation (M)-M3	19.91	1	564.802	1127.59	1127.59	2	20.98			IPI00878557	62 kDa protein	HQLVHTGEKPFQCTFEGCGKR	Carbamidomethyl (C)-C13|Carbamidomethyl (C)-C18	84.76	1	1258.6	2515.18	2515.19	2	35.78
IPI00456758	60S ribosomal protein L27a	VGMKHYHLKR	Oxidation (M)-M3	26.97	1	428.905	1283.69	1283.69	3	19.19			IPI00878557	62 kDa protein	IHTGDRPYVCPFDGCNK	Carbamidomethyl (C)-C10|Carbamidomethyl (C)-C15	68.87	1	1018.46	2034.9	2034.91	2	37.2
IPI00878557	62 kDa protein	AFVESSK		16.1	1	384.2	766.386	766.386	2	23.87			IPI00878557	62 kDa protein	IHTGDRPYVCPFDGCNKK	Carbamidomethyl (C)-C10|Carbamidomethyl (C)-C15	49.83	1	1082.51	2163	2163	2	34.91
IPI00878557	62 kDa protein	DIDHETVVEEQIIGENSPPDYSEYMTGK		121.43	1	1598.22	3194.42	3194.43	2	49.49			IPI00878557	62 kDa protein	IHTGDRPYVCPFDGCNKK	Carbamidomethyl (C)-C10	43.49	1	527.5	2105.98	2105.97	4	36.9
IPI00878557	62 kDa protein	DIDHETVVEEQIIGENSPPDYSEYMTGK	Oxidation (M)-M25	91.33	1	1071.15	3210.42	3210.43	3	46.31			IPI00878557	62 kDa protein	IHTGDRPYVCPFDGCNKK	Carbamidomethyl (C)-C10|Carbamidomethyl (C)-C15|Deamidation (NQ)-N16	34.43	1	542.003	2163.98	2163.98	4	34.83
IPI00878557	62 kDa protein	DNSAMRK		36.43	1	411.2	820.386	820.386	2	12.25			IPI00878557	62 kDa protein	IKEDDAPR		62.3	1	472.245	942.477	942.476	2	18.62
IPI00878557	62 kDa protein	EEVVGGDDSDGLRAEDGFEDQILIPVPAPAGGDDDYIEQTLVTVAAAGK		33.18	1	1254.36	5013.39	5013.4	4	64.39			IPI00878557	62 kDa protein	KDIDHETVVEEQIIGENSPPDYSEYMTGK		107.06	1	1108.52	3322.52	3322.53	3	47.2
IPI00878557	62 kDa protein	FAQSTNLK		44.72	1	454.745	907.476	907.476	2	28.07			IPI00878557	62 kDa protein	KDIDHETVVEEQIIGENSPPDYSEYMTGK	Oxidation (M)-M26	108.02	1	1113.85	3338.51	3338.52	3	43.73
IPI00878557	62 kDa protein	FAQSTNLKSHILTHAK		93.69	1	898.496	1794.97	1794.98	2	33.35			IPI00878557	62 kDa protein	KFAQSTNLK		60.92	1	518.793	1035.57	1035.57	2	27.04
IPI00878557	62 kDa protein	FSLDFNLR		63.37	1	506.267	1010.52	1010.52	2	53.99			IPI00878557	62 kDa protein	KHLHTHGPR		51.67	1	361.538	1081.59	1081.59	3	20.3
IPI00878557	62 kDa protein	HLHTHGPR		51.2	1	477.754	953.494	953.494	2	12			IPI00878557	62 kDa protein	KIKEDDAPR		70.44	1	536.293	1070.57	1070.57	2	17.65
IPI00878557	62 kDa protein	HQLVHTGEKPFQCTFEGCGK	Carbamidomethyl (C)-C13|Carbamidomethyl (C)-C18	62.94	1	787.37	2359.08	2359.09	3	36.99			IPI00878557	62 kDa protein	KLPPGGIPGIDLSDPK		52.16	1	802.458	1602.9	1602.9	2	45.48
IPI00878557	62 kDa protein	HQLVHTGEKPFQCTFEGCGKR	Carbamidomethyl (C)-C13|Carbamidomethyl (C)-C18	82.79	1	839.403	2515.18	2515.19	3	35.38			IPI00878557	62 kDa protein	KLPPGGIPGIDLSDPKQLAEFAR		70.44	1	605.591	2418.33	2418.33	4	51.98
IPI00878557	62 kDa protein	IHTGDRPYVCPFDGCNK	Carbamidomethyl (C)-C10|Carbamidomethyl (C)-C15	70.42	1	1018.46	2034.9	2034.91	2	37.2			IPI00878557	62 kDa protein	KSYLSGGAGAAGGGGADPGNK		99.03	1	896.437	1790.85	1790.86	2	29.2
IPI00878557	62 kDa protein	IHTGDRPYVCPFDGCNKK	Carbamidomethyl (C)-C10|Carbamidomethyl (C)-C15	61.32	1	1082.51	2163	2163	2	34.43			IPI00878557	62 kDa protein	KSYLSGGAGAAGGGGADPGNKK		100.06	1	640.658	1918.95	1918.95	3	27.79
IPI00878557	62 kDa protein	IHTGDRPYVCPFDGCNKK	Carbamidomethyl (C)-C10	39.24	1	527.501	2105.98	2105.97	4	36.82			IPI00878557	62 kDa protein	KSYLSGGAGAAGGGGADPGNKK	Deamidation (NQ)-N20	52.57	1	640.991	1919.93	1919.95	3	27.93
IPI00878557	62 kDa protein	IKEDDAPR		34.99	1	472.246	942.477	942.478	2	20.2			IPI00878557	62 kDa protein	KSYLSGGAGAAGGGGADPGNKKWEQK		93.89	1	623.563	2490.23	2490.22	4	32.41
IPI00878557	62 kDa protein	KDIDHETVVEEQIIGENSPPDYSEYMTGK		123.79	1	1108.52	3322.52	3322.52	3	46.95			IPI00878557	62 kDa protein	KSYLSGGAGAAGGGGADPGNKKWEQK	Deamidation (NQ)-N20	101.17	1	499.253	2491.21	2491.23	5	32.03
IPI00878557	62 kDa protein	KDIDHETVVEEQIIGENSPPDYSEYMTGK	Oxidation (M)-M26	119.07	1	1113.85	3338.51	3338.52	3	43.7			IPI00878557	62 kDa protein	LPPGGIPGIDLSDPK		24.5	1	738.411	1474.8	1474.81	2	48.4
IPI00878557	62 kDa protein	KFAQSTNLK		63.59	1	518.793	1035.57	1035.57	2	26.84			IPI00878557	62 kDa protein	MFRDNSAMR		57.45	1	564.257	1126.5	1126.5	2	29.32
IPI00878557	62 kDa protein	KHLHTHGPR		53.46	1	541.801	1081.59	1081.59	2	11.87			IPI00878557	62 kDa protein	MFRDNSAMR	Oxidation (M)-M1	42.64	1	381.84	1142.5	1142.5	3	26.17
IPI00878557	62 kDa protein	KIKEDDAPR		79.66	1	536.292	1070.57	1070.57	2	16.22			IPI00878557	62 kDa protein	MFRDNSAMR	Oxidation (M)-M8	19.86	1	572.255	1142.5	1142.5	2	24.2
IPI00878557	62 kDa protein	KLPPGGIPGIDLSDPK		43.8	1	802.464	1602.9	1602.91	2	46.75			IPI00878557	62 kDa protein	MFRDNSAMRK		50.76	1	419.206	1254.6	1254.59	3	26.3
IPI00878557	62 kDa protein	KLPPGGIPGIDLSDPKQLAEFAR		31.76	1	807.119	2418.33	2418.33	3	51.92			IPI00878557	62 kDa protein	MFRDNSAMRK	Deamidation (NQ)-N5|Oxidation (M)-M8	34.61	1	424.866	1271.58	1271.58	3	22.19
IPI00878557	62 kDa protein	KSYLSGGAGAAGGGGADPGNK		95.53	1	597.959	1790.85	1790.85	3	29.19			IPI00878557	62 kDa protein	MFRDNSAMRK	Deamidation (NQ)-N5	22.19	1	628.797	1255.58	1255.58	2	27.36
IPI00878557	62 kDa protein	KSYLSGGAGAAGGGGADPGNKK		130.19	1	640.658	1918.95	1918.95	3	27.72			IPI00878557	62 kDa protein	MFRDNSAMRK	Oxidation (M)-M8	35.3	1	424.538	1270.59	1270.59	3	21.27
IPI00878557	62 kDa protein	KSYLSGGAGAAGGGGADPGNKKWEQK		87.7	1	623.562	2490.23	2490.22	4	32.92			IPI00878557	62 kDa protein	QLAEFAR		22.35	1	417.727	833.44	833.44	2	35.44
IPI00878557	62 kDa protein	KSYLSGGAGAAGGGGADPGNKKWEQK	Deamidation (NQ)-N20	127.11	1	623.81	2491.21	2491.21	4	32.35			IPI00878557	62 kDa protein	RFSLDFNLR		51.59	1	584.319	1166.62	1166.62	2	50.68
IPI00878557	62 kDa protein	KSYLSGGAGAAGGGGADPGNKKWEQK	Deamidation (NQ)-Q25	102	1	623.814	2491.21	2491.23	4	31.81			IPI00878557	62 kDa protein	RGEAGSRDEQRPSER		58.74	1	433.213	1728.83	1728.82	4	15.06
IPI00878557	62 kDa protein	LPPGGIPGIDLSDPK		24.62	1	492.608	1474.8	1474.8	3	47.32			IPI00878557	62 kDa protein	SHILTHAK		42.31	1	302.844	905.508	905.51	3	17.43
IPI00878557	62 kDa protein	MFRDNSAMR		53.34	1	564.257	1126.5	1126.5	2	29.24			IPI00878557	62 kDa protein	SYLSGGAGAAGGGGADPGNK		100.14	1	832.388	1662.76	1662.76	2	31.16
IPI00878557	62 kDa protein	MFRDNSAMR	Oxidation (M)-M1	16.45	1	572.254	1142.5	1142.49	2	26.09			IPI00878557	62 kDa protein	SYLSGGAGAAGGGGADPGNKK		77.29	1	896.436	1790.85	1790.86	2	29.99
IPI00878557	62 kDa protein	MFRDNSAMR	Oxidation (M)-M8	22.51	1	572.255	1142.5	1142.5	2	24.06			IPI00878557	62 kDa protein	SYLSGGAGAAGGGGADPGNKK	Deamidation (NQ)-N19	44.76	1	598.293	1791.84	1791.86	3	33.41
IPI00878557	62 kDa protein	MFRDNSAMRK		75.96	1	314.657	1254.6	1254.6	4	26.24			IPI00878557	62 kDa protein	SYLSGGAGAAGGGGADPGNKKWEQK		103.72	1	788.385	2362.13	2362.13	3	33.53
IPI00878557	62 kDa protein	MFRDNSAMRK	Deamidation (NQ)-N5|Oxidation (M)-M8	41.43	1	424.866	1271.58	1271.58	3	22.01			IPI00878557	62 kDa protein	TIACPHK	Carbamidomethyl (C)-C4	38.49	1	413.716	825.417	825.418	2	19.02
IPI00878557	62 kDa protein	MFRDNSAMRK	Deamidation (NQ)-N5	19.45	1	628.797	1255.58	1255.58	2	27.36			IPI00878557	62 kDa protein	TIACPHKGCTK	Carbamidomethyl (C)-C4|Carbamidomethyl (C)-C9	38.52	1	636.813	1271.61	1271.61	2	16.25
IPI00878557	62 kDa protein	QLAEFAR		47.61	1	417.728	833.44	833.441	2	35.08			IPI00878557	62 kDa protein	TLEGEFSVTMWSSDEK		55.99	1	923.416	1844.81	1844.82	2	53.28
IPI00878557	62 kDa protein	RFSLDFNLR		68.6	1	584.318	1166.62	1166.62	2	50.71			IPI00878557	62 kDa protein	TLEGEFSVTMWSSDEK	Oxidation (M)-M10	81.64	1	931.412	1860.81	1860.81	2	48.98
IPI00878557	62 kDa protein	RGEAGSRDEQRPSER		76.95	1	433.214	1728.83	1728.83	4	15.26			IPI00878557	62 kDa protein	TLEGEFSVTMWSSDEKK		16.64	1	658.644	1972.91	1972.91	3	50.58
IPI00878557	62 kDa protein	RHQLVHTGEKPFQCTFEGCGKR	Deamidation (NQ)-Q13|Carbamidomethyl (C)-C14|Carbamidomethyl (C)-C19	21.67	1	535.464	2672.27	2672.28	5	34.32			IPI00878557	62 kDa protein	TLEGEFSVTMWSSDEKK	Oxidation (M)-M10	52.25	1	995.462	1988.9	1988.91	2	46.94
IPI00878557	62 kDa protein	RPGGREEARPGR		23.64	1	335.184	1336.71	1336.71	4	12.38			IPI00878557	62 kDa protein	VHVCAECGK	Carbamidomethyl (C)-C4|Carbamidomethyl (C)-C7	56.36	1	530.239	1058.46	1058.46	2	22.57
IPI00878557	62 kDa protein	SHILTHAK		45.93	1	302.845	905.508	905.512	3	17.22			IPI00021440	Actin cytoplasmic 2	DSYVGDEAQSK		33.38	1	599.765	1197.51	1197.51	2	25.72
IPI00878557	62 kDa protein	SYLSGGAGAAGGGGADPGNK		123.18	1	832.385	1662.76	1662.76	2	31.11			IPI00021440	Actin cytoplasmic 2	EITALAPSTMK		32.44	1	581.313	1160.61	1160.61	2	39.11
IPI00878557	62 kDa protein	SYLSGGAGAAGGGGADPGNKK		65.74	1	896.436	1790.85	1790.86	2	29.67			IPI00021440	Actin cytoplasmic 2	HQGVMVGMGQK	Oxidation (M)-M5|Oxidation (M)-M8	48.24	1	401.859	1202.55	1202.56	3	21
IPI00878557	62 kDa protein	SYLSGGAGAAGGGGADPGNKK	Deamidation (NQ)-N19	47.88	1	598.292	1791.84	1791.85	3	31.19			IPI00021440	Actin cytoplasmic 2	SYELPDGQVITIGNER		87.91	1	895.952	1789.88	1789.89	2	49.26
IPI00878557	62 kDa protein	SYLSGGAGAAGGGGADPGNKKWEQK		92.87	1	788.385	2362.13	2362.13	3	33.53			IPI00021440	Actin cytoplasmic 2	VAPEEHPVLLTEAPLNPK		53.25	1	977.537	1953.06	1953.06	2	44.75
IPI00878557	62 kDa protein	TIACPHK	Carbamidomethyl (C)-C4	32.31	1	413.716	825.417	825.418	2	18.7			IPI00291467	ADP/ATP translocase 3	EQGVLSFWR		25.48	1	561.29	1120.57	1120.57	2	53.95
IPI00878557	62 kDa protein	TIACPHKGCTK	Carbamidomethyl (C)-C4|Carbamidomethyl (C)-C9	41.2	1	318.909	1271.61	1271.61	4	16.9			IPI00291467	ADP/ATP translocase 3	LLLQVQHASK		36.53	1	568.842	1135.67	1135.67	2	36.46
IPI00878557	62 kDa protein	TLEGEFSVTMWSSDEK	Oxidation (M)-M10	88.59	1	931.412	1860.81	1860.81	2	48.79			IPI00291467	ADP/ATP translocase 3	MMMQSGR		33.8	1	420.68	839.345	839.346	2	26.12
IPI00878557	62 kDa protein	TLEGEFSVTMWSSDEKK		16.86	1	658.643	1972.91	1972.91	3	50.57			IPI00291467	ADP/ATP translocase 3	RMMMQSGR		22.04	1	498.73	995.446	995.445	2	25.21
IPI00878557	62 kDa protein	TLEGEFSVTMWSSDEKK	Oxidation (M)-M10	35.56	1	663.975	1988.9	1988.9	3	46.71			IPI00291467	ADP/ATP translocase 3	TAVAPIER		25.4	1	428.748	855.481	855.482	2	28.9
IPI00878557	62 kDa protein	VHVCAECGK	Carbamidomethyl (C)-C4|Carbamidomethyl (C)-C7	48.02	1	530.24	1058.46	1058.46	2	21.43			IPI00024143	Aladin	GGGVTNLLWSPDGSK		59.52	1	744.375	1486.74	1486.74	2	49.52
IPI00021440	Actin cytoplasmic 2	DLYANTVLSGGTTMYPGIADR	Oxidation (M)-M14	70.12	1	1116.04	2230.06	2230.06	2	47.51			IPI00024143	Aladin	GQWINLPVLQLTK		74.93	1	755.444	1508.87	1508.87	2	60.04
IPI00021440	Actin cytoplasmic 2	DLYANTVLSGGTTMYPGIADR		62.26	1	1108.04	2214.06	2214.07	2	50.59			IPI00024143	Aladin	ILATTPSAVFR		39.01	1	588.343	1174.67	1174.67	2	44.21
IPI00021440	Actin cytoplasmic 2	DSYVGDEAQSK		45.96	1	599.767	1197.51	1197.52	2	25.64			IPI00024143	Aladin	LLSASPVDAAIR		42.81	1	606.85	1211.69	1211.69	2	41.9
IPI00021440	Actin cytoplasmic 2	HQGVMVGMGQK	Oxidation (M)-M5|Oxidation (M)-M8	22.28	1	602.283	1202.55	1202.55	2	20.91			IPI00024143	Aladin	SATIVADLSETTIQTPDGEER		61.75	1	1117.05	2232.08	2232.08	2	48.16
IPI00021440	Actin cytoplasmic 2	IWHHTFYNELR		15.22	1	758.38	1514.74	1514.74	2	40.36			IPI00013808	Alpha-actinin-4	LASDLLEWIR		66.35	1	608.34	1214.67	1214.67	2	59.61
IPI00021440	Actin cytoplasmic 2	SYELPDGQVITIGNER		87.44	1	895.95	1789.88	1789.89	2	49.1			IPI00013808	Alpha-actinin-4	MAPYQGPDAVPGALDYK		73.85	1	896.934	1791.85	1791.85	2	44.4
IPI00021440	Actin cytoplasmic 2	VAPEEHPVLLTEAPLNPK		69.77	1	977.539	1953.06	1953.06	2	44.46			IPI00013808	Alpha-actinin-4	TINEVENQILTR		37.88	1	715.392	1428.76	1428.77	2	44.37
IPI00007188	ADP/ATP translocase 2	EQGVLSFWR		34.2	1	561.29	1120.57	1120.57	2	53.69			IPI00013808	Alpha-actinin-4	VGWEQLLTTIAR		90.37	1	693.891	1385.77	1385.77	2	62.26
IPI00007188	ADP/ATP translocase 2	LLLQVQHASK		43.74	1	568.845	1135.67	1135.68	2	36.21			IPI00706094	Alpha-S1-casein precursor	FFVAPFPEVFGK		35.04	1	692.869	1383.72	1383.72	2	60.79
IPI00007188	ADP/ATP translocase 2	MMMQSGR		36.92	1	420.68	839.345	839.346	2	26			IPI00706094	Alpha-S1-casein precursor	HIQKEDVPSER		45.78	1	446.565	1336.67	1336.67	3	24.19
IPI00007188	ADP/ATP translocase 2	QITADKQYK	Deamidation (NQ)-Q1	15.4	1	548.294	1094.56	1094.57	2	16.41			IPI00706094	Alpha-S1-casein precursor	HQGLPQEVLNENLLR		62.75	1	880.477	1758.94	1758.94	2	48.64
IPI00007188	ADP/ATP translocase 2	YFPTQALNFAFK		66.04	1	723.875	1445.73	1445.74	2	57.03			IPI00033907	Anaphase-promoting complex subunit 1	GLFMNSEFLPVVK		36.27	1	740.897	1479.78	1479.78	2	57.91
IPI00024143	Aladin	GGGVTNLLWSPDGSK		51.9	1	744.378	1486.74	1486.74	2	49.18			IPI00033907	Anaphase-promoting complex subunit 1	VKSEEENVVLK		33.65	1	637.352	1272.69	1272.69	2	31.55
IPI00024143	Aladin	GQVTLYEHNNELVTGSSYESPPPDFR		42.49	1	979.464	2935.36	2935.37	3	44.82			IPI00479824	Arginine-glutamic acid dipeptide	DLPGAIPPPMSAAHQLQAMHAQSAELQR		22.78	1	989.166	2964.47	2964.48	3	48.08
IPI00024143	Aladin	GQWINLPVLQLTK		78.18	1	755.444	1508.87	1508.87	2	59.89			IPI00479824	Arginine-glutamic acid dipeptide	MASLTSDPLAR		78.35	1	581.299	1160.59	1160.58	2	41.63
IPI00024143	Aladin	ILATTPSAVFR		29.48	1	588.343	1174.67	1174.67	2	44.25			IPI00479824	Arginine-glutamic acid dipeptide	NSPSAASTSSNDSKAETVKK		33.54	1	670.333	2007.97	2007.98	3	21.46
IPI00024143	Aladin	SATIVADLSETTIQTPDGEER		31.36	1	1117.05	2232.08	2232.09	2	48.06			IPI00479824	Arginine-glutamic acid dipeptide	RLNSTQGEIR		48.02	1	587.32	1172.63	1172.62	2	25.29
IPI00024143	Aladin	VQDGKPVILLFR		35.74	1	692.921	1383.82	1383.83	2	50.76			IPI00479824	Arginine-glutamic acid dipeptide	SVNDEGSSDPKDIDQDNR		56.85	1	664.291	1989.85	1989.85	3	27.05
IPI00013808	Alpha-actinin-4	LASDLLEWIR		73.85	1	608.341	1214.67	1214.67	2	59.45			IPI00479824	Arginine-glutamic acid dipeptide	TDLYFMPLAGSK		56.89	1	671.84	1341.66	1341.67	2	52.81
IPI00013808	Alpha-actinin-4	LSGSNPYTTVTPQIINSK		88.34	1	960.509	1919	1919	2	43.16			IPI00479824	Arginine-glutamic acid dipeptide	TLSEYARPHVMSPTNR		26.39	1	929.967	1857.92	1857.92	2	35.32
IPI00013808	Alpha-actinin-4	MAPYQGPDAVPGALDYK		91.75	1	896.933	1791.85	1791.85	2	43.87			IPI00479824	Arginine-glutamic acid dipeptide	VASDTEEADRTSSK		29.55	1	499.233	1494.68	1494.68	3	18.09
IPI00706094	Alpha-S1-casein precursor	FFVAPFPEVFGK		38.33	1	692.869	1383.72	1383.72	2	60.71			IPI00294834	Aspartyl/asparaginyl beta-hydroxylase	GAIETYQEVASLPDVPADLLK		25.8	1	1115.09	2228.16	2228.16	2	57.86
IPI00706094	Alpha-S1-casein precursor	HIQKEDVPSER		55.58	1	446.565	1336.67	1336.67	3	24.23			IPI00294834	Aspartyl/asparaginyl beta-hydroxylase	GHFASVWQR		27.17	1	544.275	1086.54	1086.54	2	38.75
IPI00706094	Alpha-S1-casein precursor	YLGYLEQLLR		45.49	1	634.356	1266.7	1266.7	2	59.2			IPI00294834	Aspartyl/asparaginyl beta-hydroxylase	LGIYDADGDGDFDVDDAK		60.57	1	950.914	1899.8	1899.81	2	45.92
IPI00294834	Aspartyl/asparaginyl beta-hydroxylase	GAIETYQEVASLPDVPADLLK		18.42	1	1115.09	2228.16	2228.16	2	57.85			IPI00294834	Aspartyl/asparaginyl beta-hydroxylase	SSGNSSSSGSGSGSTSAGSSSPGARR		53.1	1	753.667	2257.98	2257.98	3	15.81
IPI00294834	Aspartyl/asparaginyl beta-hydroxylase	GDWSQFTLWQQGR		25.93	1	804.882	1607.75	1607.75	2	53.73			IPI00294834	Aspartyl/asparaginyl beta-hydroxylase	VHYGFILK		31.15	1	326.192	975.554	975.555	3	44.02
IPI00294834	Aspartyl/asparaginyl beta-hydroxylase	GHFASVWQR		24.18	1	544.275	1086.54	1086.54	2	38.57			IPI00456013	ATP synthase H+ transporting mitochondrial F0 complex subunit F2 isoform 2c	DFSPSGIFGAFQR		53.18	1	714.849	1427.68	1427.68	2	57.58
IPI00294834	Aspartyl/asparaginyl beta-hydroxylase	LGIYDADGDGDFDVDDAK		78.55	1	950.909	1899.8	1899.8	2	45.69			IPI00456013	ATP synthase H+ transporting mitochondrial F0 complex subunit F2 isoform 2c	EHERLR		21.31	1	420.222	838.441	838.43	2	24.66
IPI00294834	Aspartyl/asparaginyl beta-hydroxylase	NDLGVGYLLIGDNDNAK		67.45	1	895.949	1789.88	1789.88	2	52.77			IPI00844578	ATP-dependent RNA helicase A	AENNSEVGASGYGVPGPTWDR		89.03	1	1081.99	2161.97	2161.97	2	42.84
IPI00294834	Aspartyl/asparaginyl beta-hydroxylase	SSGNSSSSGSGSGSTSAGSSSPGAR		61.53	1	1051.95	2101.87	2101.88	2	15.86			IPI00844578	ATP-dependent RNA helicase A	DFVNYLVR		17.09	1	513.279	1024.53	1024.54	2	49.92
IPI00294834	Aspartyl/asparaginyl beta-hydroxylase	SSGNSSSSGSGSGSTSAGSSSPGARR		80.72	1	753.667	2257.98	2257.98	3	15.56			IPI00844578	ATP-dependent RNA helicase A	KMTPSYEIR		38.91	1	562.791	1123.57	1123.57	2	33.09
IPI00220834	ATP-dependent DNA helicase 2 subunit 2	DKPSGDTAAVFEEGGDVDDLLDMI		61.57	1	1255.07	2508.12	2508.13	2	65.18			IPI00844578	ATP-dependent RNA helicase A	KVFDPVPVGVTK		66.9	1	643.38	1284.74	1284.74	2	40.93
IPI00220834	ATP-dependent DNA helicase 2 subunit 2	EEASGSSVTAEEAKK		80.3	1	761.865	1521.72	1521.72	2	23.81			IPI00844578	ATP-dependent RNA helicase A	LAQFEPSQR		61.64	1	538.28	1074.55	1074.55	2	33.11
IPI00844578	ATP-dependent RNA helicase A	AENNSEVGASGYGVPGPTWDR		78.1	1	1081.99	2161.97	2161.97	2	42.62			IPI00844578	ATP-dependent RNA helicase A	LGYIHR		35.44	1	379.719	757.423	757.424	2	28.95
IPI00844578	ATP-dependent RNA helicase A	DFVNYLVR		23.71	1	513.274	1024.53	1024.53	2	49.64			IPI00844578	ATP-dependent RNA helicase A	LPIEPR		35.93	1	362.722	723.428	723.43	2	32.33
IPI00844578	ATP-dependent RNA helicase A	ILTTEGR		34.76	1	395.228	788.439	788.441	2	25.46			IPI00844578	ATP-dependent RNA helicase A	RISAVSVAER		43.56	1	544.314	1086.61	1086.61	2	30.72
IPI00844578	ATP-dependent RNA helicase A	KMTPSYEIR		39.88	1	562.792	1123.57	1123.57	2	32.9			IPI00844578	ATP-dependent RNA helicase A	TTQVPQFILDDFIQNDR		86.58	1	1025.52	2049.02	2049.02	2	59.71
IPI00844578	ATP-dependent RNA helicase A	KVFDPVPVGVTK		69.6	1	643.379	1284.74	1284.74	2	40.91			IPI00844578	ATP-dependent RNA helicase A	YTQVGPDHNR		37	1	593.783	1185.55	1185.55	2	22.35
IPI00844578	ATP-dependent RNA helicase A	LAQFEPSQR		24.59	1	538.279	1074.55	1074.54	2	32.47			IPI00477923	Atrophin-1	ARVEEASTPK		25.23	1	544.291	1086.57	1086.57	2	20.72
IPI00844578	ATP-dependent RNA helicase A	LGYIHR		33.78	1	379.72	757.423	757.426	2	28.92			IPI00477923	Atrophin-1	ASPGGVSTSSSDGKAEK		32.2	1	522.253	1563.74	1563.74	3	21.13
IPI00844578	ATP-dependent RNA helicase A	LNQYFQK		30.61	1	470.75	939.481	939.485	2	32.73			IPI00477923	Atrophin-1	DLPASLSAPMSAAHQLQAMHAQSAELQR		64.53	1	987.156	2958.44	2958.45	3	50.01
IPI00844578	ATP-dependent RNA helicase A	LPIEPR		40.13	1	362.721	723.428	723.428	2	32.21			IPI00477923	Atrophin-1	GFNSCAR	Carbamidomethyl (C)-C5	16.39	1	406.181	810.344	810.347	2	23.08
IPI00844578	ATP-dependent RNA helicase A	RISAVSVAER		55.1	1	544.314	1086.61	1086.61	2	30.39			IPI00477923	Atrophin-1	GGGAASSVGGPNGGK		40.14	1	586.786	1171.56	1171.56	2	20.02
IPI00844578	ATP-dependent RNA helicase A	TTQVPQFILDDFIQNDR		81.09	1	1025.52	2049.02	2049.02	2	59.82			IPI00477923	Atrophin-1	KRADLVEK		27.1	1	479.787	957.561	957.56	2	19.02
IPI00844578	ATP-dependent RNA helicase A	VFDPVPVGVTK		20.48	1	579.331	1156.65	1156.65	2	43.38			IPI00477923	Atrophin-1	NHPFYVPLGAVDPGLLGYNVPALYSSDPAAR		50.94	1	1090.89	3269.65	3269.66	3	60.65
IPI00844578	ATP-dependent RNA helicase A	VQSDGQIVLVDDWIK		66.8	1	857.956	1713.89	1713.9	2	55.62			IPI00477923	Atrophin-1	RAPSPGAYK		33.71	1	473.759	945.503	945.502	2	23.26
IPI00844578	ATP-dependent RNA helicase A	YTQVGPDHNR		52.54	1	593.784	1185.55	1185.55	2	21.96			IPI00218200	B-cell receptor-associated protein 31	EYDRLLEEHAK		32.44	1	701.853	1401.69	1401.69	2	33.84
IPI00301323	ATP-dependent RNA helicase DDX18	ISDIQSQLEK		29.74	1	580.815	1159.61	1159.62	2	36.23			IPI00218200	B-cell receptor-associated protein 31	GAAVDGGKLDVGNAEVK		75.88	1	800.421	1598.83	1598.83	2	35.39
IPI00301323	ATP-dependent RNA helicase DDX18	MVNDAEPDTKK		44.09	1	624.301	1246.59	1246.59	2	21.84			IPI00218200	B-cell receptor-associated protein 31	GAAVDGGKLDVGNAEVKLEEENR		118.47	1	1185.61	2369.18	2369.2	2	40.56
IPI00477923	Atrophin-1	ARVEEASTPK		29.01	1	544.292	1086.57	1086.57	2	20.34			IPI00218200	B-cell receptor-associated protein 31	KGAAVDGGKLDVGNAEVKLEEENR	Deamidation (NQ)-N14	53.5	1	625.577	2498.26	2498.28	4	39.22
IPI00477923	Atrophin-1	ASPGGVSTSSSDGKAEK		68.27	1	782.879	1563.74	1563.74	2	20.73			IPI00218200	B-cell receptor-associated protein 31	KYDDVTEK		17.39	1	499.246	996.476	996.477	2	21.75
IPI00477923	Atrophin-1	DLPASLSAPMSAAHQLQAMHAQSAELQR		64.09	1	987.155	2958.44	2958.44	3	49.81			IPI00218200	B-cell receptor-associated protein 31	KYMEENDQLK	Oxidation (M)-M3	25.3	1	657.306	1312.6	1312.6	2	25.2
IPI00477923	Atrophin-1	KRADLVEK		36.27	1	320.195	957.561	957.564	3	19.36			IPI00218200	B-cell receptor-associated protein 31	KYMEENDQLKK		60.89	1	713.356	1424.7	1424.7	2	26.44
IPI00477923	Atrophin-1	LALAAGPALRPDMSYAER		55.11	1	951.5	1900.98	1900.99	2	44.74			IPI00218200	B-cell receptor-associated protein 31	KYMEENDQLKK	Oxidation (M)-M3	46.01	1	721.355	1440.69	1440.7	2	23.02
IPI00477923	Atrophin-1	RAPSPGAYK		35.16	1	473.758	945.503	945.502	2	23.19			IPI00218200	B-cell receptor-associated protein 31	LDVGNAEVKLEEENR		105.78	1	857.934	1713.85	1713.85	2	39.59
IPI00477923	Atrophin-1	SLNDDGSSDPR		50.46	1	581.751	1161.49	1161.49	2	22.02			IPI00218200	B-cell receptor-associated protein 31	LEKAENQVLAMR	Deamidation (NQ)-N6	20.93	1	468.256	1401.73	1401.75	3	37.48
IPI00477923	Atrophin-1	TLSEYARPHVMSPGNR		34.33	1	907.952	1813.89	1813.89	2	34.73			IPI00218200	B-cell receptor-associated protein 31	LLEEHAK		39.46	1	420.235	838.455	838.456	2	22.67
IPI00477923	Atrophin-1	VEEASTPK		19.86	1	430.722	859.429	859.429	2	17.91			IPI00218200	B-cell receptor-associated protein 31	LQAAVDGPMDKKEE		79.81	1	765.877	1529.74	1529.74	2	31.61
IPI00218200	B-cell receptor-associated protein 31	EYDRLLEEHAK		36.45	1	351.43	1401.69	1401.69	4	33.6			IPI00218200	B-cell receptor-associated protein 31	LQAAVDGPMDKKEE	Oxidation (M)-M9	75.64	1	773.875	1545.73	1545.74	2	27.04
IPI00218200	B-cell receptor-associated protein 31	GAAVDGGKLDVGNAEVK		100.18	1	800.422	1598.83	1598.83	2	35.03			IPI00218200	B-cell receptor-associated protein 31	QAESASEAAKK		53.42	1	373.86	1118.56	1118.56	3	12.61
IPI00218200	B-cell receptor-associated protein 31	GAAVDGGKLDVGNAEVKLEEENR		79.11	1	790.737	2369.18	2369.19	3	40.23			IPI00218200	B-cell receptor-associated protein 31	SLKADLQK		24.38	1	301.516	901.523	901.527	3	28.2
IPI00218200	B-cell receptor-associated protein 31	KGAAVDGGKLDVGNAEVKLEEENR	Deamidation (NQ)-N23	45.99	1	625.577	2498.26	2498.28	4	39.34			IPI00218200	B-cell receptor-associated protein 31	YMEENDQLKK		60.2	1	649.309	1296.6	1296.6	2	27.73
IPI00218200	B-cell receptor-associated protein 31	KQSEGLTKEYDR		56.83	1	485.247	1452.72	1452.72	3	26.24			IPI00218200	B-cell receptor-associated protein 31	YMEENDQLKK	Oxidation (M)-M2	32.44	1	657.306	1312.6	1312.6	2	24.17
IPI00218200	B-cell receptor-associated protein 31	KYDDVTEK		21.98	1	499.247	996.476	996.479	2	21.11			IPI00103599	BRI3-binding protein	SSPSGPSNPSNPSVEEK		76.68	1	850.393	1698.77	1698.77	2	26.96
IPI00218200	B-cell receptor-associated protein 31	KYMEENDQLK	Oxidation (M)-M3	21.35	1	657.306	1312.6	1312.6	2	24.95			IPI00103599	BRI3-binding protein	TVNTFSQSVSSLFGEDNVR		104.65	1	1044.01	2086	2086	2	56.25
IPI00218200	B-cell receptor-associated protein 31	KYMEENDQLKK		92.01	1	713.356	1424.7	1424.7	2	26.28			IPI00027180	CAAX prenyl protease 1 homolog	NEEEGNSEEIKAK		72.34	1	738.846	1475.67	1475.68	2	23.27
IPI00218200	B-cell receptor-associated protein 31	KYMEENDQLKK	Oxidation (M)-M3	55.65	1	721.355	1440.69	1440.7	2	22.46			IPI00027180	CAAX prenyl protease 1 homolog	VYVVEGSKR		41.68	1	518.792	1035.57	1035.57	2	26.31
IPI00218200	B-cell receptor-associated protein 31	LDVGNAEVKLEEENR		104.65	1	857.935	1713.85	1713.85	2	39.35			IPI00025729	Calcium signal-modulating cyclophilin ligand	NRGDLTADSVQR		75.3	1	666.338	1330.66	1330.66	2	27.72
IPI00218200	B-cell receptor-associated protein 31	LKDELASTK		56.62	1	502.785	1003.55	1003.56	2	26.93			IPI00025729	Calcium signal-modulating cyclophilin ligand	RVVLGDSVSTGTTDQQGGVAEVK		20.47	1	768.402	2302.18	2302.18	3	37.07
IPI00218200	B-cell receptor-associated protein 31	LLEEHAK		43.4	1	420.235	838.455	838.456	2	22.38			IPI00025729	Calcium signal-modulating cyclophilin ligand	VVLGDSVSTGTTDQQGGVAEVK		122.64	1	1074.05	2146.08	2146.08	2	37.69
IPI00218200	B-cell receptor-associated protein 31	LQAAVDGPMDKKEE		91.37	1	765.876	1529.74	1529.74	2	31.32			IPI00021536	Calmodulin-like protein 5	AFSAVDTDGNGTINAQELGAALK		138.59	1	1132.07	2262.11	2262.12	2	49.29
IPI00218200	B-cell receptor-associated protein 31	LQAAVDGPMDKKEE	Oxidation (M)-M9	57.11	1	516.252	1545.73	1545.73	3	27.04			IPI00021536	Calmodulin-like protein 5	NLSEAQLR		35.12	1	465.754	929.493	929.493	2	31.57
IPI00218200	B-cell receptor-associated protein 31	QAESASEAAKK		68.08	1	373.86	1118.56	1118.56	3	12.32			IPI00478946	cAMP responsive element binding protein 5 isoform alpha	AQEEESSKR		54.23	1	532.254	1062.49	1062.49	2	11.91
IPI00218200	B-cell receptor-associated protein 31	SLKADLQK		39.91	1	301.516	901.523	901.527	3	28.18			IPI00478946	cAMP responsive element binding protein 5 isoform alpha	FPTEDHLMIHR		55.66	1	698.344	1394.68	1394.67	2	38.59
IPI00218200	B-cell receptor-associated protein 31	VNLQNNPGAMEHFHMK		58.21	1	622.963	1865.87	1865.87	3	39.32			IPI00478946	cAMP responsive element binding protein 5 isoform alpha	FPTEDHLMIHR	Oxidation (M)-M8	25.29	1	706.343	1410.67	1410.67	2	36.41
IPI00218200	B-cell receptor-associated protein 31	VNLQNNPGAMEHFHMK	Oxidation (M)-M10	48.67	1	628.294	1881.86	1881.86	3	35.1			IPI00478946	cAMP responsive element binding protein 5 isoform alpha	HKHEMTLK		44.27	1	341.852	1022.53	1022.53	3	19.62
IPI00218200	B-cell receptor-associated protein 31	YMEENDQLKK		61.76	1	649.309	1296.6	1296.6	2	27.41			IPI00478946	cAMP responsive element binding protein 5 isoform alpha	KAEELTQTNMQLQNEVSMLK		110.51	1	1168.09	2334.16	2334.16	2	48.45
IPI00218200	B-cell receptor-associated protein 31	YMEENDQLKK	Oxidation (M)-M2	31.63	1	657.306	1312.6	1312.6	2	24.09			IPI00478946	cAMP responsive element binding protein 5 isoform alpha	KAEELTQTNMQLQNEVSMLKNEVAQLK		78.12	1	1039.87	3116.58	3116.59	3	58.54
IPI00103599	BRI3-binding protein	SSPSGPSNPSNPSVEEK		48.68	1	850.395	1698.77	1698.78	2	26.56			IPI00478946	cAMP responsive element binding protein 5 isoform alpha	KVWVMSLEK		44.92	1	560.315	1118.62	1118.62	2	44.93
IPI00103599	BRI3-binding protein	TVNTFSQSVSSLFGEDNVR		51.44	1	696.341	2086	2086	3	56.27			IPI00478946	cAMP responsive element binding protein 5 isoform alpha	LPNHDTNVVIQQAMPSPQSSSVITQAPSTNR		71.4	1	1106.56	3316.65	3316.66	3	42.91
IPI00103599	BRI3-binding protein	VLESLDR		39.23	1	416.233	830.45	830.452	2	31.75			IPI00478946	cAMP responsive element binding protein 5 isoform alpha	NISMHNAVGGAMTGPGTHQLSSAR		120.07	1	1197.58	2393.13	2393.14	2	38.41
IPI00027180	CAAX prenyl protease 1 homolog	NEEEGNSEEIKAK		66.88	1	738.847	1475.67	1475.68	2	22.91			IPI00478946	cAMP responsive element binding protein 5 isoform alpha	NISMHNAVGGAMTGPGTHQLSSAR	Oxidation (M)-M4	107.25	1	804.051	2409.13	2409.13	3	34.42
IPI00027180	CAAX prenyl protease 1 homolog	VYVVEGSKR		51.13	1	518.792	1035.57	1035.57	2	26.09			IPI00478946	cAMP responsive element binding protein 5 isoform alpha	NISMHNAVGGAMTGPGTHQLSSAR	Oxidation (M)-M4|Oxidation (M)-M12	50.24	1	809.382	2425.12	2425.12	3	30.6
IPI00025729	Calcium signal-modulating cyclophilin ligand	IMGFHRPGSGAEEESQTK		33.74	1	654.311	1959.91	1959.91	3	33.39			IPI00478946	cAMP responsive element binding protein 5 isoform alpha	RRVVDEDPDERR		21.84	1	386.2	1540.77	1540.77	4	22.99
IPI00025729	Calcium signal-modulating cyclophilin ligand	NRGDLTADSVQR		85.03	1	666.338	1330.66	1330.66	2	27.66			IPI00478946	cAMP responsive element binding protein 5 isoform alpha	RVVDEDPDERR		35.1	1	462.564	1384.67	1384.67	3	23.09
IPI00025729	Calcium signal-modulating cyclophilin ligand	VVLGDSVSTGTTDQQGGVAEVK		58.56	1	1074.05	2146.08	2146.08	2	37.69			IPI00478946	cAMP responsive element binding protein 5 isoform alpha	TDNMLSDQTPTPTR		63.23	1	788.868	1575.72	1575.72	2	34.47
IPI00021536	Calmodulin-like protein 5	AFSAVDTDGNGTINAQELGAALK		122.13	1	1132.06	2262.11	2262.11	2	49.19			IPI00478946	cAMP responsive element binding protein 5 isoform alpha	TDNMLSDQTPTPTR	Oxidation (M)-M4	38.62	1	796.867	1591.71	1591.72	2	29.2
IPI00021536	Calmodulin-like protein 5	AFSAVDTDGNGTINAQELGAALK	Deamidation (NQ)-N14	72.73	1	755.377	2263.1	2263.11	3	49.31			IPI00478946	cAMP responsive element binding protein 5 isoform alpha	VVDEDPDERR		38.68	1	615.292	1228.57	1228.57	2	22.72
IPI00478946	cAMP responsive element binding protein 5 isoform alpha	AQEEESSKR		57.58	1	355.172	1062.49	1062.5	3	11.85			IPI00884054	Cas-Br-M (murine) ecotropic retroviral transforming sequence	GTEPIVVDPFDPR		41.02	1	721.37	1440.72	1440.73	2	50.31
IPI00478946	cAMP responsive element binding protein 5 isoform alpha	FPTEDHLMIHR		59.42	1	698.345	1394.68	1394.68	2	38.4			IPI00884054	Cas-Br-M (murine) ecotropic retroviral transforming sequence	ICAENDKDVK	Carbamidomethyl (C)-C2	46.38	1	397.862	1190.56	1190.56	3	21.2
IPI00478946	cAMP responsive element binding protein 5 isoform alpha	HKHEMTLK		49.65	1	341.852	1022.53	1022.54	3	19.59			IPI00884054	Cas-Br-M (murine) ecotropic retroviral transforming sequence	QGAEGAPSPNYDDDDDERADDTLFMMK		102.75	1	1001.75	3002.22	3002.23	3	48.14
IPI00478946	cAMP responsive element binding protein 5 isoform alpha	KAEELTQTNMQLQNEVSMLK		115.24	1	1168.09	2334.16	2334.16	2	48.17			IPI00884054	Cas-Br-M (murine) ecotropic retroviral transforming sequence	SSGAGGGSGSGGSGSGGLIGLMK		140.63	1	919.441	1836.86	1836.87	2	47.02
IPI00478946	cAMP responsive element binding protein 5 isoform alpha	KAEELTQTNMQLQNEVSMLKNEVAQLK		90.84	1	1039.87	3116.58	3116.59	3	58.64			IPI00884054	Cas-Br-M (murine) ecotropic retroviral transforming sequence	VPVSAPSSSDPWTGR		61.43	1	771.882	1541.75	1541.75	2	38.98
IPI00478946	cAMP responsive element binding protein 5 isoform alpha	KVWVMSLEK		42.88	1	560.315	1118.62	1118.62	2	45.05			IPI00010872	CBX4 protein	AADERHPPADR		32.1	1	617.8	1233.59	1233.58	2	14.8
IPI00478946	cAMP responsive element binding protein 5 isoform alpha	LPNHDTNVVIQQAMPSPQSSSVITQAPSTNR	Oxidation (M)-M14	61.63	1	1111.89	3332.64	3332.65	3	38.91			IPI00010872	CBX4 protein	AAGAEEKKVEAPPK		51.46	1	356.95	1423.77	1423.77	4	23.53
IPI00478946	cAMP responsive element binding protein 5 isoform alpha	NISMHNAVGGAMTGPGTHQLSSAR		133.18	1	1197.58	2393.13	2393.14	2	38.27			IPI00010872	CBX4 protein	AGKPPPPGK		23.94	1	424.753	847.492	847.492	2	12.1
IPI00478946	cAMP responsive element binding protein 5 isoform alpha	NISMHNAVGGAMTGPGTHQLSSAR	Oxidation (M)-M4|Oxidation (M)-M12	71.78	1	809.382	2425.12	2425.12	3	30.34			IPI00010872	CBX4 protein	AKLDLGAQGKGQGHQYELNSK		59.39	1	561.294	2241.15	2241.15	4	33.81
IPI00478946	cAMP responsive element binding protein 5 isoform alpha	RKVWVMSLEK		45.83	1	425.913	1274.72	1274.72	3	42.07			IPI00010872	CBX4 protein	EAFGEQPLQLTTKPDLLAWDPAR		63.2	1	866.12	2595.33	2595.34	3	56.7
IPI00478946	cAMP responsive element binding protein 5 isoform alpha	RVVDEDPDERR		42.83	1	462.563	1384.67	1384.67	3	22.7			IPI00010872	CBX4 protein	EAPSPTCPDLGAK	Carbamidomethyl (C)-C7	55.56	1	671.82	1341.62	1341.62	2	32.26
IPI00478946	cAMP responsive element binding protein 5 isoform alpha	TDNMLSDQTPTPTR		84.02	1	788.867	1575.72	1575.72	2	34.23			IPI00010872	CBX4 protein	EAVTGNGIGGK		63.95	1	501.764	1001.51	1001.51	2	26.29
IPI00478946	cAMP responsive element binding protein 5 isoform alpha	TDNMLSDQTPTPTR	Oxidation (M)-M4	68.62	1	796.866	1591.71	1591.72	2	29.25			IPI00010872	CBX4 protein	EAVTGNGIGGK	Deamidation (NQ)-N6	34.3	1	502.257	1002.5	1002.5	2	26.8
IPI00478946	cAMP responsive element binding protein 5 isoform alpha	VVDEDPDERR		36.59	1	615.292	1228.57	1228.57	2	22.48			IPI00010872	CBX4 protein	EEEVSGVSDPQPQDAGSR		90.35	1	943.924	1885.83	1885.83	2	30.31
IPI00478946	cAMP responsive element binding protein 5 isoform alpha	VWVMSLEK		22.83	1	496.267	990.521	990.52	2	47.94			IPI00010872	CBX4 protein	EEEVSGVSDPQPQDAGSRK		58.98	1	1007.97	2013.92	2013.93	2	28.87
IPI00218414	Carbonic anhydrase 2	AVQQPDGLAVLGIFLK		77.4	1	834.989	1667.96	1667.96	2	65.9			IPI00010872	CBX4 protein	ELPAVGEHVFAVESIEK		43.5	1	927.49	1852.96	1852.97	2	58.72
IPI00218414	Carbonic anhydrase 2	YDPSLKPLSVSYDQATSLR		48.65	1	714.036	2139.08	2139.09	3	46.52			IPI00010872	CBX4 protein	ERAGKPPPPGK		27.55	1	378.552	1132.64	1132.63	3	12.29
IPI00884054	Cas-Br-M (murine) ecotropic retroviral transforming sequence	ALVIAQNNIEMAK		87.73	1	707.89	1413.76	1413.76	2	42.26			IPI00010872	CBX4 protein	ERQEQLMGYR		38.64	1	655.32	1308.62	1308.62	2	33.8
IPI00884054	Cas-Br-M (murine) ecotropic retroviral transforming sequence	ALVIAQNNIEMAK	Oxidation (M)-M11	39.87	1	715.887	1429.76	1429.76	2	38.65			IPI00010872	CBX4 protein	ERQEQLMGYR	Oxidation (M)-M7	54.74	1	442.546	1324.62	1324.62	3	28.05
IPI00884054	Cas-Br-M (murine) ecotropic retroviral transforming sequence	EFVSISSPAHVAT		30.66	1	672.844	1343.67	1343.67	2	41.72			IPI00010872	CBX4 protein	ERQEQLMGYRK		36.11	1	719.368	1436.72	1436.72	2	29.71
IPI00884054	Cas-Br-M (murine) ecotropic retroviral transforming sequence	GIFPSGLFQGDTFR		15.86	1	771.392	1540.77	1540.77	2	58.73			IPI00010872	CBX4 protein	ERQEQLMGYRK	Oxidation (M)-M7	15.96	1	727.365	1452.71	1452.71	2	24.85
IPI00884054	Cas-Br-M (murine) ecotropic retroviral transforming sequence	KSSGAGGGSGSGGSGSGGLIGLMK		33.51	1	655.993	1964.96	1964.96	3	45.04			IPI00010872	CBX4 protein	GPPNGMMPAPK	Deamidation (NQ)-N4	43.88	1	549.259	1096.5	1096.5	2	32.81
IPI00884054	Cas-Br-M (murine) ecotropic retroviral transforming sequence	METLGENEYFR		58.33	1	694.816	1387.61	1387.62	2	43.78			IPI00010872	CBX4 protein	GPPNGMMPAPK	Deamidation (NQ)-N4|Oxidation (M)-M7	24.02	1	557.257	1112.5	1112.5	2	28.69
IPI00884054	Cas-Br-M (murine) ecotropic retroviral transforming sequence	MYEENSQPR		61.36	1	577.251	1152.49	1152.49	2	24.24			IPI00010872	CBX4 protein	GQGHQYELNSK		69.96	1	630.802	1259.59	1259.59	2	25.85
IPI00884054	Cas-Br-M (murine) ecotropic retroviral transforming sequence	QGAEGAPSPNYDDDDDERADDTLFMMK		110.06	1	1001.75	3002.22	3002.22	3	47.99			IPI00010872	CBX4 protein	GQGHQYELNSK	Deamidation (NQ)-N9	64.24	1	421.198	1260.57	1260.57	3	27.31
IPI00884054	Cas-Br-M (murine) ecotropic retroviral transforming sequence	SSGAGGGSGSGGSGSGGLIGLMK		138.33	1	919.44	1836.86	1836.87	2	46.81			IPI00010872	CBX4 protein	GQGHQYELNSKK		64.67	1	694.85	1387.68	1387.69	2	23.25
IPI00884054	Cas-Br-M (murine) ecotropic retroviral transforming sequence	VPVSAPSSSDPWTGR		61.36	1	771.882	1541.75	1541.75	2	38.63			IPI00010872	CBX4 protein	GRVEYLVK		28.06	1	482.284	962.555	962.554	2	33.08
IPI00010872	CBX4 protein	AADERHPPADR		36.18	1	309.401	1233.59	1233.57	4	14.83			IPI00010872	CBX4 protein	GSEKGPPNGMMPAPK	Deamidation (NQ)-N8	67.25	1	749.855	1497.7	1497.7	2	31.57
IPI00010872	CBX4 protein	AGKPPPPGK		30.22	1	424.753	847.492	847.491	2	12.15			IPI00010872	CBX4 protein	GSEKGPPNGMMPAPK		40.93	1	749.357	1496.71	1496.7	2	33.49
IPI00010872	CBX4 protein	AKLDLGAQGK		60.61	1	500.793	999.571	999.571	2	29.18			IPI00010872	CBX4 protein	GSEKGPPNGMMPAPK	Oxidation (M)-M10	38.15	1	757.355	1512.71	1512.69	2	28.38
IPI00010872	CBX4 protein	AKLDLGAQGKGQGHQYELNSK	Deamidation (NQ)-N19	73.41	1	561.545	2242.13	2242.15	4	33.51			IPI00010872	CBX4 protein	GSEKGPPNGMMPAPK	Deamidation (NQ)-N8|Oxidation (M)-M11	56.73	1	757.854	1513.69	1513.69	2	26.33
IPI00010872	CBX4 protein	CLSETHGEREPCK	Carbamidomethyl (C)-C1|Carbamidomethyl (C)-C12	15.49	1	534.904	1601.69	1601.69	3	22.48			IPI00010872	CBX4 protein	GSEKGPPNGMMPAPK	Deamidation (NQ)-N8|Oxidation (M)-M10	23.81	1	505.571	1513.69	1513.69	3	28.52
IPI00010872	CBX4 protein	EAFGEQPLQLTTKPDLLAWDPAR		65.85	1	1298.68	2595.33	2595.34	2	56.67			IPI00010872	CBX4 protein	GYLGAVKPLAGAAGAPGK		71.46	1	799.457	1596.9	1596.9	2	40.32
IPI00010872	CBX4 protein	EAPSPTCPDLGAK	Carbamidomethyl (C)-C7	64.68	1	671.819	1341.62	1341.62	2	32.07			IPI00010872	CBX4 protein	GYLGAVKPLAGAAGAPGKGSEKGPPNGMMPAPK	Deamidation (NQ)-N26	52.1	1	770.154	3076.58	3076.59	4	41.21
IPI00010872	CBX4 protein	EAVTGNGIGGK	Deamidation (NQ)-N6	45.91	1	502.256	1002.5	1002.5	2	26.33			IPI00010872	CBX4 protein	HHPYQPDPK		23.76	1	559.772	1117.53	1117.53	2	19.4
IPI00010872	CBX4 protein	EEEVSGVSDPQPQDAGSR		104.38	1	943.925	1885.83	1885.83	2	29.66			IPI00010872	CBX4 protein	HHQYQPHSK		34.52	1	581.281	1160.55	1160.55	2	12.01
IPI00010872	CBX4 protein	EEEVSGVSDPQPQDAGSRK		66.07	1	1007.97	2013.92	2013.93	2	28.86			IPI00010872	CBX4 protein	IKSGEVAEGEAR		83.56	1	623.325	1244.64	1244.64	2	24.28
IPI00010872	CBX4 protein	ERAGKPPPPGK		32.74	1	378.553	1132.64	1132.64	3	12.31			IPI00010872	CBX4 protein	IVIVMSK		47.76	1	395.25	788.483	788.485	2	37.1
IPI00010872	CBX4 protein	ERQEQLMGYR		62.89	1	655.32	1308.62	1308.62	2	33.38			IPI00010872	CBX4 protein	KAAGAEEKKVEAPPK		95.98	1	388.973	1551.86	1551.86	4	21.04
IPI00010872	CBX4 protein	ERQEQLMGYR	Oxidation (M)-M7	48.4	1	442.546	1324.62	1324.62	3	27.97			IPI00010872	CBX4 protein	KGRVEYLVK		65.64	1	364.558	1090.65	1090.65	3	30.63
IPI00010872	CBX4 protein	ERQEQLMGYRK		61.04	1	479.913	1436.72	1436.72	3	29.91			IPI00010872	CBX4 protein	KHHPYQPDPK		36.53	1	623.821	1245.63	1245.63	2	16.74
IPI00010872	CBX4 protein	GPPNGMMPAPK	Deamidation (NQ)-N4	25.17	1	549.259	1096.5	1096.5	2	32.7			IPI00010872	CBX4 protein	KHHQYQPHSK		51.7	1	430.555	1288.64	1288.64	3	12.02
IPI00010872	CBX4 protein	GQGHQYELNSK		51.68	1	630.802	1259.59	1259.59	2	25.79			IPI00010872	CBX4 protein	KVEAPPK		54.37	1	384.735	767.454	767.456	2	16.38
IPI00010872	CBX4 protein	GQGHQYELNSK	Deamidation (NQ)-Q5	36.77	1	421.199	1260.57	1260.58	3	27.16			IPI00010872	CBX4 protein	KVEAPPKR		25.79	1	308.86	923.555	923.558	3	15.5
IPI00010872	CBX4 protein	GQGHQYELNSK	Deamidation (NQ)-N9	57.03	1	631.294	1260.57	1260.57	2	26.96			IPI00010872	CBX4 protein	KVEAPPKRREEEVSGVSDPQPQDAGSR		54.87	1	737.877	2947.47	2947.48	4	28.67
IPI00010872	CBX4 protein	GQGHQYELNSKK		82.17	1	694.85	1387.68	1387.69	2	22.63			IPI00010872	CBX4 protein	LLIAFQNR		58.47	1	487.793	973.571	973.571	2	46.03
IPI00010872	CBX4 protein	GRVEYLVK		31.48	1	482.284	962.555	962.554	2	32.77			IPI00010872	CBX4 protein	MYDLQYQGGHK		56.53	1	670.309	1338.6	1338.6	2	34.86
IPI00010872	CBX4 protein	GSEKGPPNGMMPAPK	Deamidation (NQ)-N8	57.18	1	749.856	1497.7	1497.7	2	31.56			IPI00010872	CBX4 protein	MYDLQYQGGHKEAPSPTCPDLGAK	Carbamidomethyl (C)-C18	76.53	1	888.413	2662.22	2662.22	3	38.66
IPI00010872	CBX4 protein	GSEKGPPNGMMPAPK		36.26	1	499.911	1496.71	1496.71	3	32.64			IPI00010872	CBX4 protein	QEQLMGYR		43.53	1	512.747	1023.48	1023.48	2	34.78
IPI00010872	CBX4 protein	GSEKGPPNGMMPAPK	Oxidation (M)-M10	35.73	1	757.363	1512.71	1512.71	2	27.62			IPI00010872	CBX4 protein	RAADERHPPADR		45.09	1	464.236	1389.69	1389.69	3	14.77
IPI00010872	CBX4 protein	GYLGAVKPLAGAAGAPGK		71.92	1	799.457	1596.9	1596.9	2	40.53			IPI00010872	CBX4 protein	REEEVSGVSDPQPQDAGSR		68.28	1	1021.98	2041.93	2041.94	2	29.22
IPI00010872	CBX4 protein	HHPYQPDPK		19.01	1	559.772	1117.53	1117.53	2	19.07			IPI00010872	CBX4 protein	RREEEVSGVSDPQPQDAGSR		54.3	1	1100.03	2198.03	2198.04	2	28.24
IPI00010872	CBX4 protein	HHQYQPHSK		44.08	1	581.281	1160.55	1160.55	2	11.98			IPI00010872	CBX4 protein	RREEEVSGVSDPQPQDAGSR	Deamidation (NQ)-Q15	24.91	1	734.019	2199.02	2199.03	3	28.06
IPI00010872	CBX4 protein	IKSGEVAEGEAR		79.86	1	623.325	1244.64	1244.64	2	23.86			IPI00010872	CBX4 protein	RREEEVSGVSDPQPQDAGSRK		31.01	1	776.384	2326.13	2326.13	3	27.14
IPI00010872	CBX4 protein	IVIVMSK		44.9	1	395.249	788.483	788.484	2	36.85			IPI00010872	CBX4 protein	RREEEVSGVSDPQPQDAGSRK	Deamidation (NQ)-Q13	38.62	1	582.789	2327.11	2327.13	4	27.21
IPI00010872	CBX4 protein	KAAGAEEKKVEAPPK		31.48	1	388.973	1551.86	1551.86	4	21.44			IPI00010872	CBX4 protein	RSNVLTGLQDSSTDNR		101.79	1	881.941	1761.86	1761.87	2	36.54
IPI00010872	CBX4 protein	KGRVEYLVK		21.44	1	546.332	1090.65	1090.65	2	30.2			IPI00010872	CBX4 protein	SGEVAEGEAR		52.07	1	502.736	1003.46	1003.46	2	19.57
IPI00010872	CBX4 protein	KHHPYQPDPK		25.54	1	623.821	1245.63	1245.63	2	16.13			IPI00010872	CBX4 protein	SHPPDKWAQGAGAK		68.54	1	483.913	1448.72	1448.72	3	27.73
IPI00010872	CBX4 protein	KHHQYQPHSK		45.01	1	430.555	1288.64	1288.64	3	14.63			IPI00010872	CBX4 protein	SNVLTGLQDSSTDNR		125.46	1	803.889	1605.76	1605.76	2	39.91
IPI00010872	CBX4 protein	KVEAPPK		55.04	1	384.736	767.454	767.457	2	16.44			IPI00010872	CBX4 protein	WAQGAGAK		20.52	1	394.706	787.398	787.398	2	21.25
IPI00010872	CBX4 protein	LDLGAQGK		34.66	1	401.228	800.439	800.441	2	29.7			IPI00010872	CBX4 protein	WRGWSPK		31.52	1	306.165	915.472	915.474	3	37.23
IPI00010872	CBX4 protein	LLIAFQNR		59.63	1	487.792	973.571	973.57	2	45.97			IPI00010872	CBX4 protein	YMENGMQAVK		37.38	1	585.768	1169.52	1169.52	2	31.97
IPI00010872	CBX4 protein	MYDLQYQGGHK		57.45	1	670.309	1338.6	1338.6	2	34.62			IPI00010872	CBX4 protein	YMENGMQAVK	Deamidation (NQ)-N4	39.58	1	586.26	1170.5	1170.51	2	34.29
IPI00010872	CBX4 protein	RAADERHPPADR		35.72	1	464.236	1389.69	1389.69	3	14.88			IPI00010872	CBX4 protein	YMENGMQAVK	Oxidation (M)-M2	64.27	1	593.765	1185.52	1185.51	2	28.85
IPI00010872	CBX4 protein	REEEVSGVSDPQPQDAGSR		70.75	1	1021.98	2041.93	2041.94	2	29.2			IPI00010872	CBX4 protein	YMENGMQAVK	Oxidation (M)-M6	47.66	1	593.766	1185.52	1185.52	2	25.77
IPI00010872	CBX4 protein	RREEEVSGVSDPQPQDAGSR		46.96	1	1100.03	2198.03	2198.04	2	28.21			IPI00010872	CBX4 protein	YMENGMQAVK	Oxidation (M)-M2|Oxidation (M)-M6	26.89	1	601.763	1201.51	1201.51	2	22.48
IPI00010872	CBX4 protein	RREEEVSGVSDPQPQDAGSRK	Deamidation (NQ)-Q15	32.34	1	582.788	2327.11	2327.12	4	26.85			IPI00010872	CBX4 protein	YNTWEPEENILDPR		52	1	888.417	1774.82	1774.82	2	50.08
IPI00010872	CBX4 protein	RREEEVSGVSDPQPQDAGSRK		36.61	1	776.384	2326.13	2326.13	3	27.01			IPI00010872	CBX4 protein	YYYQLNSK		44.67	1	539.763	1077.51	1077.51	2	34.69
IPI00010872	CBX4 protein	RSNVLTGLQDSSTDNR		80.71	1	881.938	1761.86	1761.86	2	35.96			IPI00010872	CBX4 protein	YYYQLNSKK		51.19	1	402.878	1205.61	1205.61	3	32.84
IPI00010872	CBX4 protein	SGEVAEGEAR		30.36	1	502.736	1003.46	1003.46	2	19.45			IPI00306723	CCAAT/enhancer-binding protein zeta	ASLIEEDEPAEKENSSK		34.83	1	625.966	1874.87	1874.87	3	33.18
IPI00010872	CBX4 protein	SHPPDKWAQGAGAK		46.32	1	725.366	1448.72	1448.72	2	26.98			IPI00306723	CCAAT/enhancer-binding protein zeta	NRPEPHSDENGSTTPK	Deamidation (NQ)-N10	51.01	1	589.604	1765.79	1765.79	3	17.95
IPI00010872	CBX4 protein	SNVLTGLQDSSTDNR		121.07	1	803.887	1605.76	1605.76	2	39.49			IPI00795546	cDNA FLJ16541 fis clone OCBBF2034823 highly similar to Mus musculus widely-interspaced zinc finger motifs (Wiz) transcript variant 1 mRNA	ADPPPEESQAPQAQTAAAEAP		31.57	1	1038.48	2074.94	2074.95	2	32.54
IPI00010872	CBX4 protein	WRGWSPK		31.12	1	306.166	915.472	915.475	3	37.48			IPI00795546	cDNA FLJ16541 fis clone OCBBF2034823 highly similar to Mus musculus widely-interspaced zinc finger motifs (Wiz) transcript variant 1 mRNA	ELSLTPITGAKPSATGYLGSVAAK		51.22	1	778.097	2331.27	2331.27	3	48.57
IPI00010872	CBX4 protein	YMENGMQAVK	Oxidation (M)-M6	43.37	1	593.765	1185.52	1185.52	2	25.69			IPI00795546	cDNA FLJ16541 fis clone OCBBF2034823 highly similar to Mus musculus widely-interspaced zinc finger motifs (Wiz) transcript variant 1 mRNA	QLGVAESESSGAPIDLLYELVK		78.36	1	1159.61	2317.21	2317.21	2	66.84
IPI00010872	CBX4 protein	YMENGMQAVK	Oxidation (M)-M2|Oxidation (M)-M6	16.55	1	601.763	1201.51	1201.51	2	22.04			IPI00795546	cDNA FLJ16541 fis clone OCBBF2034823 highly similar to Mus musculus widely-interspaced zinc finger motifs (Wiz) transcript variant 1 mRNA	QMGVTEWSVNGSPIDTLR		51.41	1	995.486	1988.96	1988.96	2	51.15
IPI00010872	CBX4 protein	YNTWEPEENILDPR		69.47	1	888.417	1774.82	1774.82	2	49.89			IPI00795546	cDNA FLJ16541 fis clone OCBBF2034823 highly similar to Mus musculus widely-interspaced zinc finger motifs (Wiz) transcript variant 1 mRNA	QMGVTEWYVNGSPIDTLR		77.29	1	1033.51	2064.99	2065	2	53.51
IPI00010872	CBX4 protein	YYYQLNSK		48.54	1	539.763	1077.51	1077.51	2	34.64			IPI00795546	cDNA FLJ16541 fis clone OCBBF2034823 highly similar to Mus musculus widely-interspaced zinc finger motifs (Wiz) transcript variant 1 mRNA	RPLQEDR		23.45	1	457.251	912.478	912.487	2	18.12
IPI00306723	CCAAT/enhancer-binding protein zeta	DKQNIFEFFER		36.63	1	491.577	1471.71	1471.71	3	57.04			IPI00795546	cDNA FLJ16541 fis clone OCBBF2034823 highly similar to Mus musculus widely-interspaced zinc finger motifs (Wiz) transcript variant 1 mRNA	RQARPPDASAAR		23.79	1	432.569	1294.69	1294.68	3	20.16
IPI00306723	CCAAT/enhancer-binding protein zeta	GVVSGEVER		41.61	1	466.246	930.477	930.477	2	27.14			IPI00795546	cDNA FLJ16541 fis clone OCBBF2034823 highly similar to Mus musculus widely-interspaced zinc finger motifs (Wiz) transcript variant 1 mRNA	SAGGEPGPEAGR		58.73	1	542.754	1083.49	1083.49	2	20.91
IPI00306723	CCAAT/enhancer-binding protein zeta	HLPVNSK		51.75	1	397.731	793.445	793.446	2	20.39			IPI00795546	cDNA FLJ16541 fis clone OCBBF2034823 highly similar to Mus musculus widely-interspaced zinc finger motifs (Wiz) transcript variant 1 mRNA	SPSDLHISPLAK		60.62	1	422.235	1263.68	1263.68	3	39.11
IPI00306723	CCAAT/enhancer-binding protein zeta	INNKNTAESQR		62.71	1	425.553	1273.64	1273.64	3	12.42			IPI00795546	cDNA FLJ16541 fis clone OCBBF2034823 highly similar to Mus musculus widely-interspaced zinc finger motifs (Wiz) transcript variant 1 mRNA	VAAEVPHGSKQELQDLK		70.47	1	616.998	1847.97	1847.97	3	34.94
IPI00306723	CCAAT/enhancer-binding protein zeta	KLETEETVPETDVETKKPEVASWVHFDNLK		51.9	1	700.558	3497.76	3497.75	5	47			IPI00472633	cDNA FLJ40872 fis clone TUTER2000283 highly similar to Homo sapiens transformer-2-beta (SFRS10) gene	AAQDRDQIYR		28.23	1	618.31	1234.61	1234.61	2	26.54
IPI00306723	CCAAT/enhancer-binding protein zeta	LGDPQNR		27.62	1	400.207	798.398	798.399	2	18.38			IPI00472633	cDNA FLJ40872 fis clone TUTER2000283 highly similar to Homo sapiens transformer-2-beta (SFRS10) gene	DLREVFSK		31.8	1	331.851	992.529	992.531	3	41.28
IPI00306723	CCAAT/enhancer-binding protein zeta	NRPEPHSDENGSTTPK	Deamidation (NQ)-N10	52.68	1	589.602	1765.79	1765.78	3	18.5			IPI00910164	cDNA FLJ53381 highly similar to Monocarboxylate transporter 1	AAESPDQKDTDGGPKEEESPV		81.31	1	1093.49	2184.97	2184.97	2	29.28
IPI00009235	cDNA FLJ52061 highly similar to Translocon-associated protein subunit gamma	GSSKQQSEEDLLLQDFSR		20.05	1	689.672	2065.99	2066	3	50.94			IPI00910164	cDNA FLJ53381 highly similar to Monocarboxylate transporter 1	ANEQKKESKEEETSIDVAGKPNEVTK		60.47	1	722.868	2887.44	2887.44	4	30.31
IPI00009235	cDNA FLJ52061 highly similar to Translocon-associated protein subunit gamma	KLSEADNR		39.08	1	466.742	931.472	931.47	2	15.76			IPI00910164	cDNA FLJ53381 highly similar to Monocarboxylate transporter 1	DLHDANTDLIGRHPK		81.1	1	851.438	1700.86	1700.86	2	33.18
IPI00009235	cDNA FLJ52061 highly similar to Translocon-associated protein subunit gamma	QQSEEDLLLQDFSR		71.84	1	569.944	1706.81	1706.81	3	53.32			IPI00910164	cDNA FLJ53381 highly similar to Monocarboxylate transporter 1	ESKEEETSIDVAGKPNEVTK		54.06	1	730.698	2189.07	2189.07	3	32.2
IPI00009235	cDNA FLJ52061 highly similar to Translocon-associated protein subunit gamma	VAQKREDAVSK		58.5	1	308.426	1229.67	1229.67	4	12.3			IPI00295940	cDNA FLJ55508 highly similar to Sad1/unc-84-like protein 2	AEHQQDSEDLFK		54.51	1	723.83	1445.64	1445.64	2	36.25
IPI00910164	cDNA FLJ53381 highly similar to Monocarboxylate transporter 1	AAESPDQKDTDGGPKEEESPV		69.54	1	1093.49	2184.97	2184.97	2	29.23			IPI00295940	cDNA FLJ55508 highly similar to Sad1/unc-84-like protein 2	DFAIFGFDEDLQQEGTLLGK		44.98	1	1122.05	2242.08	2242.08	2	62.99
IPI00910164	cDNA FLJ53381 highly similar to Monocarboxylate transporter 1	ANEQKKESKEEETSIDVAGKPNEVTK		46.82	1	722.868	2887.44	2887.44	4	30			IPI00295940	cDNA FLJ55508 highly similar to Sad1/unc-84-like protein 2	EAALKEDFRR		54.52	1	412.223	1233.65	1233.65	3	30.64
IPI00910164	cDNA FLJ53381 highly similar to Monocarboxylate transporter 1	DLHDANTDLIGRHPK		71.35	1	567.96	1700.86	1700.86	3	33.05			IPI00295940	cDNA FLJ55508 highly similar to Sad1/unc-84-like protein 2	EGVIGVTEEQVHHIVK		62.15	1	591.988	1772.94	1772.94	3	45.33
IPI00910164	cDNA FLJ53381 highly similar to Monocarboxylate transporter 1	DTDGGPKEEESPV		16.54	1	680.3	1358.58	1358.59	2	28.13			IPI00295940	cDNA FLJ55508 highly similar to Sad1/unc-84-like protein 2	IGLADYALESGGASVISTR		106.59	1	940.494	1878.97	1878.97	2	50.57
IPI00910164	cDNA FLJ53381 highly similar to Monocarboxylate transporter 1	ESKEEETSIDVAGKPNEVTK		73.88	1	548.274	2189.07	2189.07	4	32.02			IPI00295940	cDNA FLJ55508 highly similar to Sad1/unc-84-like protein 2	ILTHVAEMQGK		48.56	1	613.832	1225.65	1225.65	2	32.63
IPI00295940	cDNA FLJ55508 highly similar to Sad1/unc-84-like protein 2	EAALKEDFRR		28.79	1	617.829	1233.65	1233.64	2	30.38			IPI00295940	cDNA FLJ55508 highly similar to Sad1/unc-84-like protein 2	ILTHVAEMQGK	Oxidation (M)-M8	48.56	1	621.829	1241.64	1241.64	2	27.4
IPI00295940	cDNA FLJ55508 highly similar to Sad1/unc-84-like protein 2	EEMQAQLR		26.87	1	502.744	1003.48	1003.47	2	29.7			IPI00295940	cDNA FLJ55508 highly similar to Sad1/unc-84-like protein 2	IRPTAVTLEHVPK		35.21	1	730.932	1459.85	1459.85	2	36.7
IPI00295940	cDNA FLJ55508 highly similar to Sad1/unc-84-like protein 2	EGVIGVTEEQVHHIVK		39.01	1	591.988	1772.94	1772.94	3	44.99			IPI00295940	cDNA FLJ55508 highly similar to Sad1/unc-84-like protein 2	KATEDFLGSSSGYSSEDDYVGYSDVDQQSSSSR		90.86	1	1185.18	3552.49	3552.51	3	44.25
IPI00295940	cDNA FLJ55508 highly similar to Sad1/unc-84-like protein 2	IGLADYALESGGASVISTR		110.12	1	940.494	1878.97	1878.97	2	50.42			IPI00295940	cDNA FLJ55508 highly similar to Sad1/unc-84-like protein 2	LEDQLAGLQQELAALALK		53.18	1	962.544	1923.07	1923.07	2	63.7
IPI00295940	cDNA FLJ55508 highly similar to Sad1/unc-84-like protein 2	ILTHVAEMQGK		50.17	1	613.832	1225.65	1225.65	2	32.36			IPI00295940	cDNA FLJ55508 highly similar to Sad1/unc-84-like protein 2	QGAPGQGGGGGLSHEDTLALLEGLVSR		22.02	1	859.441	2575.3	2575.3	3	59.71
IPI00295940	cDNA FLJ55508 highly similar to Sad1/unc-84-like protein 2	IQEELSALRAEHQQDSEDLFKK	Deamidation (NQ)-Q2	15.43	1	523.868	2614.29	2614.3	5	42.18			IPI00295940	cDNA FLJ55508 highly similar to Sad1/unc-84-like protein 2	RLEALAAEFSSNWQK		109.9	1	875.452	1748.88	1748.89	2	50.35
IPI00295940	cDNA FLJ55508 highly similar to Sad1/unc-84-like protein 2	IRPTAVTLEHVPK		22.98	1	730.933	1459.85	1459.85	2	36.47			IPI00295940	cDNA FLJ55508 highly similar to Sad1/unc-84-like protein 2	SSLEELHGDANWGEDLR		83.26	1	964.444	1926.87	1926.87	2	45.43
IPI00295940	cDNA FLJ55508 highly similar to Sad1/unc-84-like protein 2	SEWQSMTQESFQESSVK		104.52	1	1009.45	2016.87	2016.88	2	44.67			IPI00295940	cDNA FLJ55508 highly similar to Sad1/unc-84-like protein 2	YSEDRIGLADYALESGGASVISTR		51.13	1	844.086	2529.23	2529.24	3	50.04
IPI00295940	cDNA FLJ55508 highly similar to Sad1/unc-84-like protein 2	SSLEELHGDANWGEDLR		71.29	1	964.445	1926.87	1926.87	2	45.19			IPI00020984	cDNA FLJ55574 highly similar to Calnexin	AKHHAISAK		51.13	1	321.523	961.546	961.547	3	11.97
IPI00295940	cDNA FLJ55508 highly similar to Sad1/unc-84-like protein 2	YSQGDDDGSSSSGGSSVAGSQSTLFKDSPLR		149.48	1	1027.13	3078.37	3078.37	3	44.95			IPI00020984	cDNA FLJ55574 highly similar to Calnexin	AKKDDTDDEIAK		73.69	1	674.833	1347.65	1347.65	2	19.04
IPI00020984	cDNA FLJ55574 highly similar to Calnexin	AKHHAISAK		62.49	1	321.523	961.546	961.547	3	11.96			IPI00020984	cDNA FLJ55574 highly similar to Calnexin	AKKDDTDDEIAKYDGK		54.83	1	604.625	1810.86	1810.85	3	29.49
IPI00020984	cDNA FLJ55574 highly similar to Calnexin	AKKDDTDDEIAK		35.51	1	450.224	1347.65	1347.65	3	18.7			IPI00020984	cDNA FLJ55574 highly similar to Calnexin	AKKDDTDDEIAKYDGKWEVEEMKESK		87.29	1	618.295	3086.44	3086.44	5	40.61
IPI00020984	cDNA FLJ55574 highly similar to Calnexin	APVPTGEVYFADSFDR		74.95	1	885.922	1769.83	1769.83	2	50.05			IPI00020984	cDNA FLJ55574 highly similar to Calnexin	AKKDDTDDEIAKYDGKWEVEEMKESK	Oxidation (M)-M22	52.74	1	776.617	3102.43	3102.44	4	38.04
IPI00020984	cDNA FLJ55574 highly similar to Calnexin	CESAPGCGVWQRPVIDNPNYK	Carbamidomethyl (C)-C1|Carbamidomethyl (C)-C7	50.14	1	816.38	2446.12	2446.12	3	42.49			IPI00020984	cDNA FLJ55574 highly similar to Calnexin	APVPTGEVYFADSFDR		74.59	1	885.923	1769.83	1769.83	2	50.33
IPI00020984	cDNA FLJ55574 highly similar to Calnexin	EIEDPEDRKPEDWDERPK		48.53	1	571.519	2282.05	2282.05	4	33.85			IPI00020984	cDNA FLJ55574 highly similar to Calnexin	CESAPGCGVWQRPVIDNPNYK	Carbamidomethyl (C)-C1|Carbamidomethyl (C)-C7	55.08	1	816.379	2446.12	2446.12	3	42.65
IPI00020984	cDNA FLJ55574 highly similar to Calnexin	GTLSGWILSK		34.09	1	531.303	1060.59	1060.59	2	50.86			IPI00020984	cDNA FLJ55574 highly similar to Calnexin	CGEDYKLHFIFR	Carbamidomethyl (C)-C1	26.02	1	528.926	1583.76	1583.76	3	47.86
IPI00020984	cDNA FLJ55574 highly similar to Calnexin	IVDDWANDGWGLK		26.29	1	744.861	1487.7	1487.71	2	51.44			IPI00020984	cDNA FLJ55574 highly similar to Calnexin	EIEDPEDRKPEDWDERPK		44.22	1	761.69	2282.05	2282.05	3	33.87
IPI00020984	cDNA FLJ55574 highly similar to Calnexin	IVDDWANDGWGLKK		71.66	1	539.607	1615.8	1615.8	3	47.04			IPI00020984	cDNA FLJ55574 highly similar to Calnexin	GTLSGWILSK		64.09	1	531.305	1060.59	1060.6	2	51.19
IPI00020984	cDNA FLJ55574 highly similar to Calnexin	KDDTDDEIAK		61.66	1	575.268	1148.52	1148.52	2	21.04			IPI00020984	cDNA FLJ55574 highly similar to Calnexin	HAKRPDADLK		25.04	1	384.216	1149.63	1149.63	3	19.24
IPI00020984	cDNA FLJ55574 highly similar to Calnexin	KIPNPDFFEDLEPFR		22.69	1	621.982	1862.92	1862.92	3	58.68			IPI00020984	cDNA FLJ55574 highly similar to Calnexin	IVDDWANDGWGLK		74.25	1	744.862	1487.7	1487.71	2	51.56
IPI00020984	cDNA FLJ55574 highly similar to Calnexin	RPDADLK		29.51	1	407.727	813.434	813.439	2	21.3			IPI00020984	cDNA FLJ55574 highly similar to Calnexin	IVDDWANDGWGLKK		58.88	1	808.908	1615.8	1615.8	2	47.39
IPI00020984	cDNA FLJ55574 highly similar to Calnexin	SDAEEDGGTVSQEEEDRKPK		40.16	1	735.997	2204.97	2204.97	3	26.76			IPI00020984	cDNA FLJ55574 highly similar to Calnexin	KDDTDDEIAK		82.25	1	575.267	1148.52	1148.52	2	21.19
IPI00020984	cDNA FLJ55574 highly similar to Calnexin	TDAPQPDVKEEEEEKEEEKDKGDEEEEGEEKLEEK		33.5	1	827.371	4131.81	4131.82	5	32.3			IPI00020984	cDNA FLJ55574 highly similar to Calnexin	KIPNPDFFEDLEPFR		59.58	1	932.471	1862.92	1862.93	2	58.79
IPI00020984	cDNA FLJ55574 highly similar to Calnexin	TPYTIMFGPDK		61.51	1	635.313	1268.61	1268.61	2	48.44			IPI00020984	cDNA FLJ55574 highly similar to Calnexin	LPGDKGLVLMSR		30.73	1	429.248	1284.72	1284.72	3	42.78
IPI00020984	cDNA FLJ55574 highly similar to Calnexin	TYFTDKK		30.29	1	451.735	901.455	901.455	2	26.55			IPI00020984	cDNA FLJ55574 highly similar to Calnexin	QKSDAEEDGGTVSQEEEDRKPK		73.73	1	821.381	2461.12	2461.12	3	26.01
IPI00020984	cDNA FLJ55574 highly similar to Calnexin	VTYKAPVPTGEVYFADSFDR		69.87	1	754.708	2261.1	2261.1	3	50.29			IPI00020984	cDNA FLJ55574 highly similar to Calnexin	RPDADLK		34.45	1	407.726	813.434	813.437	2	21.34
IPI00020984	cDNA FLJ55574 highly similar to Calnexin	YDGKWEVEEMKESK		39.31	1	586.608	1756.8	1756.8	3	37.15			IPI00020984	cDNA FLJ55574 highly similar to Calnexin	SDAEEDGGTVSQEEEDRKPK		64.57	1	735.997	2204.97	2204.97	3	26.78
IPI00910738	cDNA FLJ60647 highly similar to Keratin type II cytoskeletal 6B	ATGGGLSSVGGGSSTIK		91.49	1	718.373	1434.73	1434.73	2	32.91			IPI00020984	cDNA FLJ55574 highly similar to Calnexin	TDAPQPDVKEEEEEKEEEKDKGDEEEEGEEKLEEK		51.15	1	827.371	4131.81	4131.82	5	32.59
IPI00910738	cDNA FLJ60647 highly similar to Keratin type II cytoskeletal 6B	RGFSASSAR		55.3	1	469.743	937.473	937.472	2	23.58			IPI00020984	cDNA FLJ55574 highly similar to Calnexin	TYFTDKK		31.85	1	301.493	901.455	901.457	3	27.13
IPI00297851	chromodomain helicase DNA binding protein 1	AETHENEPGPLTVGDELLSQFK		63.93	1	804.396	2410.17	2410.17	3	61			IPI00020984	cDNA FLJ55574 highly similar to Calnexin	VTYKAPVPTGEVYFADSFDR		75.54	1	1131.56	2261.1	2261.11	2	50.42
IPI00297851	chromodomain helicase DNA binding protein 1	ALKDSSSGTER		59.5	1	575.788	1149.56	1149.56	2	15.6			IPI00020984	cDNA FLJ55574 highly similar to Calnexin	YDGKWEVEEMK		49.71	1	471.883	1412.63	1412.63	3	40.08
IPI00297851	chromodomain helicase DNA binding protein 1	DAELVDKSETDLRR		59.87	1	823.921	1645.83	1645.83	2	34.68			IPI00020984	cDNA FLJ55574 highly similar to Calnexin	YDGKWEVEEMKESK		78.53	1	586.608	1756.8	1756.8	3	37.17
IPI00297851	chromodomain helicase DNA binding protein 1	EALSGAGSSKR		44.69	1	531.78	1061.55	1061.55	2	18.25			IPI00020984	cDNA FLJ55574 highly similar to Calnexin	YDGKWEVEEMKESKLPGDK		36.36	1	756.701	2267.08	2267.08	3	40.2
IPI00297851	chromodomain helicase DNA binding protein 1	FGAEELFKEPEGEEQEPQEMDIDEILK		75.91	1	1060.49	3178.45	3178.46	3	56.54			IPI00006702	cDNA FLJ56414 highly similar to Homo sapiens proline- glutamic acid- leucine-rich protein 1 (PELP1) mRNA	GSPDGSLQTGKPSAPK		50.25	1	763.896	1525.77	1525.78	2	27.82
IPI00297851	chromodomain helicase DNA binding protein 1	GSVEEDILER		35.35	1	573.785	1145.56	1145.56	2	42.07			IPI00006702	cDNA FLJ56414 highly similar to Homo sapiens proline- glutamic acid- leucine-rich protein 1 (PELP1) mRNA	LHDLVLPLVMGVQQGEVLGSSPYTSSR		36.88	1	961.51	2881.5	2881.51	3	59.1
IPI00297851	chromodomain helicase DNA binding protein 1	HLTQYHDHHK		19.06	1	439.214	1314.62	1314.62	3	15.1			IPI00006702	cDNA FLJ56414 highly similar to Homo sapiens proline- glutamic acid- leucine-rich protein 1 (PELP1) mRNA	LHGSVGGAQNLSALGALVSLSNAR		26.05	1	764.754	2291.23	2291.24	3	56.55
IPI00297851	chromodomain helicase DNA binding protein 1	HLTQYHDHHKDR		41.67	1	529.59	1585.75	1585.75	3	14.95			IPI00006702	cDNA FLJ56414 highly similar to Homo sapiens proline- glutamic acid- leucine-rich protein 1 (PELP1) mRNA	LLLLESVSGLLQPR		30.68	1	769.47	1536.92	1536.93	2	64.17
IPI00297851	chromodomain helicase DNA binding protein 1	ILPDDPDKKPQAK		17.76	1	732.908	1463.8	1463.8	2	27.01			IPI00297851	chromodomain helicase DNA binding protein 1	ALKDSSSGTER		39.3	1	384.195	1149.56	1149.56	3	15.66
IPI00297851	chromodomain helicase DNA binding protein 1	LKENTNHDDSSR		72.47	1	472.554	1414.64	1414.64	3	12.07			IPI00297851	chromodomain helicase DNA binding protein 1	EALSGAGSSKR		31.69	1	531.779	1061.55	1061.54	2	18.07
IPI00297851	chromodomain helicase DNA binding protein 1	LKENTNHDDSSRDSYSSDR	Deamidation (NQ)-N4	61.16	1	557.498	2225.94	2225.96	4	21.4			IPI00297851	chromodomain helicase DNA binding protein 1	LKENTNHDDSSR		70.18	1	472.555	1414.64	1414.64	3	12.14
IPI00297851	chromodomain helicase DNA binding protein 1	LKENTNHDDSSRDSYSSDR		52.52	1	742.662	2224.96	2224.96	3	21.14			IPI00297851	chromodomain helicase DNA binding protein 1	LKENTNHDDSSRDSYSSDR		62.45	1	557.247	2224.96	2224.96	4	21.5
IPI00297851	chromodomain helicase DNA binding protein 1	MLDILAEYLK		23.34	1	604.833	1207.65	1207.65	2	60.74			IPI00297851	chromodomain helicase DNA binding protein 1	RAETHENEPGPLTVGDELLSQFK		56.81	1	856.428	2566.27	2566.26	3	59.6
IPI00297851	chromodomain helicase DNA binding protein 1	RQESQQNSDQNSNLNPHVIRNPDVER		81.02	1	769.375	3073.47	3073.47	4	33.49			IPI00297851	chromodomain helicase DNA binding protein 1	SNLEGSLKDR		66.61	1	373.532	1117.57	1117.57	3	30.37
IPI00297851	chromodomain helicase DNA binding protein 1	SNLEGSLKDR		67.15	1	559.793	1117.57	1117.57	2	29.94			IPI00297851	chromodomain helicase DNA binding protein 1	SSVSDAPVHITASGEPVPISEESEELDQK		84.53	1	1013.16	3036.44	3036.45	3	44.18
IPI00297851	chromodomain helicase DNA binding protein 1	SPFEHSVEHK		29.99	1	598.788	1195.56	1195.56	2	26.29			IPI00297851	chromodomain helicase DNA binding protein 1	STPEHTWSSR		35.5	1	594.275	1186.54	1186.54	2	27.08
IPI00297851	chromodomain helicase DNA binding protein 1	SSPSILAVQR		26.98	1	529.304	1056.59	1056.59	2	37.87			IPI00297851	chromodomain helicase DNA binding protein 1	TVLHTGSAPSSSTPFNKEELSAILK		54.87	1	872.133	2613.36	2613.38	3	49.62
IPI00297851	chromodomain helicase DNA binding protein 1	SSVSDAPVHITASGEPVPISEESEELDQK		97.97	1	1013.16	3036.44	3036.44	3	43.78			IPI00297851	chromodomain helicase DNA binding protein 1	VANFSNMDEDDIELEPER		95.38	1	1061.97	2121.92	2121.92	2	46.66
IPI00297851	chromodomain helicase DNA binding protein 1	STPEHTWSSR		40.22	1	594.275	1186.54	1186.54	2	26.98			IPI00552978	Cohesin subunit SA-2	EQTLHTPVMMQTPQLTSTIMR		30.9	1	815.08	2442.21	2442.22	3	50.43
IPI00297851	chromodomain helicase DNA binding protein 1	TVLHTGSAPSSSTPFNKEELSAILK		53.28	1	872.131	2613.36	2613.37	3	49.31			IPI00552978	Cohesin subunit SA-2	ERTELKPDFFDPASIMDESVLGVSMF		24.71	1	987.476	2959.4	2959.4	3	68.67
IPI00297851	chromodomain helicase DNA binding protein 1	VANFSNMDEDDIELEPER		97.73	1	1061.97	2121.92	2121.92	2	46.41			IPI00552978	Cohesin subunit SA-2	FALTFGLDQLK		55.6	1	626.851	1251.69	1251.69	2	57.47
IPI00552978	Cohesin subunit SA-2	EQTLHTPVMMQTPQLTSTIMREPK		31.51	1	933.146	2796.4	2796.42	3	48.77			IPI00552978	Cohesin subunit SA-2	GKGGNGGGKPPSGPNR	Deamidation (NQ)-N5	36.84	1	479.911	1436.71	1436.71	3	15.83
IPI00552978	Cohesin subunit SA-2	FALTFGLDQLK		32.53	1	626.851	1251.69	1251.69	2	57.38			IPI00552978	Cohesin subunit SA-2	LLEDFLQEGEEPDEDDAYQVLSTLKR		104.36	1	1018.16	3051.46	3051.46	3	58.28
IPI00552978	Cohesin subunit SA-2	GKGGNGGGKPPSGPNR	Deamidation (NQ)-N5	36.61	1	479.911	1436.71	1436.71	3	15.93			IPI00552978	Cohesin subunit SA-2	NSLLAGGDDDTMSVISGISSR		73.32	1	1048.01	2093.99	2094	2	51.68
IPI00552978	Cohesin subunit SA-2	HLDALLR		29.04	1	419.251	836.487	836.487	2	37.37			IPI00552978	Cohesin subunit SA-2	RDPEEDGMMK		44.01	1	604.258	1206.5	1206.5	2	27.86
IPI00552978	Cohesin subunit SA-2	KELARR		17.13	1	386.743	771.471	771.472	2	20.5			IPI00552978	Cohesin subunit SA-2	SQLIDELADKFNR		67.43	1	774.904	1547.79	1547.79	2	51.17
IPI00552978	Cohesin subunit SA-2	LLEDFLQEGEEPDEDDAYQVLSTLKR		127.95	1	1018.16	3051.46	3051.46	3	58.18			IPI00027717	Component of gems 4	EWGEELQAVLR		58.25	1	665.345	1328.67	1328.67	2	53.65
IPI00552978	Cohesin subunit SA-2	NSLLAGGDDDTMSVISGISSR		136.77	1	1048	2093.99	2093.99	2	51.58			IPI00027717	Component of gems 4	SIAEGIGPEER		37.89	1	579.292	1156.57	1156.57	2	34.6
IPI00552978	Cohesin subunit SA-2	RDPEEDGMMK		39.65	1	604.259	1206.5	1206.5	2	27.53			IPI00030247	Cyclin-T1	AASSKPEEIKMR		30.69	1	673.859	1345.7	1345.7	2	27.44
IPI00552978	Cohesin subunit SA-2	SQLIDELADKFNR		68.4	1	774.904	1547.79	1547.79	2	51.17			IPI00030247	Cyclin-T1	AKHAEELAAQK		73.51	1	399.219	1194.64	1194.64	3	18.83
IPI00299524	Condensin complex subunit 1	SGGVNQYVVQEVLSIK		63.56	1	860.469	1718.92	1718.92	2	56			IPI00030247	Cyclin-T1	AKHAEELAAQKR		90.32	1	338.69	1350.74	1350.73	4	17.17
IPI00299524	Condensin complex subunit 1	TAAASAVLDPEEEWEAMLPELK		22.5	1	1200.59	2399.16	2399.16	2	63.06			IPI00030247	Cyclin-T1	EQLENSPSR		25.22	1	530.257	1058.5	1058.5	2	22.92
IPI00220994	Core histone macro-H2A.2	GVTIASGGVLPR		56.38	1	563.832	1125.65	1125.65	2	41.08			IPI00030247	Cyclin-T1	EQLENSPSRR		36.06	1	405.875	1214.6	1214.6	3	20.97
IPI00220994	Core histone macro-H2A.2	IHPELLAK		16.84	1	307.524	919.549	919.551	3	35.46			IPI00030247	Cyclin-T1	GPSEETGGAVFDHPAK		86.64	1	799.877	1597.74	1597.74	2	33.24
IPI00220994	Core histone macro-H2A.2	LSLTQSDISHIGSMR		40.78	1	548.951	1643.83	1643.83	3	44.73			IPI00030247	Cyclin-T1	HAEELAAQK		37.1	1	498.759	995.504	995.503	2	20.4
IPI00030247	Cyclin-T1	AASSKPEEIK		31.73	1	530.288	1058.56	1058.56	2	20.44			IPI00030247	Cyclin-T1	HAEELAAQKR		78.41	1	576.81	1151.6	1151.61	2	18.1
IPI00030247	Cyclin-T1	ADKTALK		31.36	1	373.724	745.433	745.434	2	15.11			IPI00030247	Cyclin-T1	HNSVEDSVTK		67.11	1	558.269	1114.53	1114.52	2	24.33
IPI00030247	Cyclin-T1	AKHAEELAAQK		38.28	1	598.325	1194.64	1194.64	2	18.66			IPI00030247	Cyclin-T1	HSHSQLPVGTGNKRPGDPK		24.18	1	671.352	2011.03	2011.03	3	25.97
IPI00030247	Cyclin-T1	AKHAEELAAQKR		85.01	1	338.691	1350.74	1350.74	4	17.2			IPI00030247	Cyclin-T1	HSSQTSNLAHK		65.54	1	403.872	1208.59	1208.59	3	15.46
IPI00030247	Cyclin-T1	EQLENSPSR		24.06	1	530.257	1058.5	1058.5	2	22.51			IPI00030247	Cyclin-T1	IKVHAAADK		31.11	1	476.782	951.55	951.549	2	18.26
IPI00030247	Cyclin-T1	EQLENSPSRR		42.29	1	405.875	1214.6	1214.6	3	20.57			IPI00030247	Cyclin-T1	IKVHAAADKHNSVEDSVTK		103.72	1	1025.04	2048.07	2048.07	2	27.59
IPI00030247	Cyclin-T1	FGVDPDKELSYR		15.5	1	475.905	1424.69	1424.69	3	40.47			IPI00030247	Cyclin-T1	IPVAGGDKAASSKPEEIK		95.44	1	898.992	1795.97	1795.97	2	29.91
IPI00030247	Cyclin-T1	GPSEETGGAVFDHPAK		112.46	1	799.877	1597.74	1597.74	2	33.12			IPI00030247	Cyclin-T1	IPVAGGDKAASSKPEEIKMR		47.59	1	695.377	2083.11	2083.11	3	32.42
IPI00030247	Cyclin-T1	HAEELAAQK		71.09	1	498.759	995.504	995.503	2	20.32			IPI00030247	Cyclin-T1	KRGPSEETGGAVFDHPAK		75.48	1	471.491	1881.93	1881.93	4	30.21
IPI00030247	Cyclin-T1	HAEELAAQKR		71.39	1	576.81	1151.6	1151.61	2	17.88			IPI00030247	Cyclin-T1	LEPTQGHR		27.57	1	469.246	936.478	936.477	2	16.68
IPI00030247	Cyclin-T1	HSHSQLPVGTGNKRPGDPK		30.23	1	1006.53	2011.03	2011.04	2	25.77			IPI00030247	Cyclin-T1	LNVSQLTINTAIVYMHR		42.47	1	658.36	1972.06	1972.06	3	55.98
IPI00030247	Cyclin-T1	HSSQTSNLAHK		86.86	1	403.872	1208.59	1208.59	3	15.15			IPI00030247	Cyclin-T1	MPIEGSENPERPFLEK		90.96	1	936.963	1871.91	1871.91	2	41.87
IPI00030247	Cyclin-T1	IKVHAAADK		27.06	1	476.781	951.55	951.548	2	18.31			IPI00030247	Cyclin-T1	MPIEGSENPERPFLEK	Oxidation (M)-M1	77.5	1	944.961	1887.9	1887.91	2	39.36
IPI00030247	Cyclin-T1	IKVHAAADKHNSVEDSVTK		99.57	1	1025.04	2048.07	2048.07	2	27.21			IPI00030247	Cyclin-T1	MRIPVAGGDK		61.92	1	522.287	1042.56	1042.56	2	33.66
IPI00030247	Cyclin-T1	IPVAGGDKAASSKPEEIK		111.06	1	449.999	1795.97	1795.97	4	29.9			IPI00030247	Cyclin-T1	QLENMEANVK	Oxidation (M)-M5	38.22	1	596.288	1190.56	1190.56	2	25.78
IPI00030247	Cyclin-T1	IPVAGGDKAASSKPEEIKMR		54.86	1	695.377	2083.11	2083.11	3	32.26			IPI00030247	Cyclin-T1	QQAANLLQDMGQR		63.94	1	736.867	1471.72	1471.72	2	45.08
IPI00030247	Cyclin-T1	KRGPSEETGGAVFDHPAK		69.64	1	471.49	1881.93	1881.93	4	29.86			IPI00030247	Cyclin-T1	QQAANLLQDMGQR	Oxidation (M)-M10	71.13	1	744.865	1487.72	1487.72	2	35.16
IPI00030247	Cyclin-T1	LEPTQGHR		38.34	1	469.247	936.478	936.478	2	16.4			IPI00030247	Cyclin-T1	RFGVDPDKELSYR		49.56	1	527.938	1580.79	1580.79	3	38.98
IPI00030247	Cyclin-T1	MPIEGSENPERPFLEK		100.76	1	936.964	1871.91	1871.91	2	41.69			IPI00030247	Cyclin-T1	RGPSEETGGAVFDHPAK		83.81	1	585.62	1753.84	1753.84	3	31.76
IPI00030247	Cyclin-T1	MPIEGSENPERPFLEK	Oxidation (M)-M1	89.28	1	944.961	1887.9	1887.91	2	39.41			IPI00030247	Cyclin-T1	SQYAYAAQNLLSHHDSHSSVILK		89.45	1	857.098	2568.27	2568.27	3	44.01
IPI00030247	Cyclin-T1	MRIPVAGGDK		65.68	1	522.287	1042.56	1042.56	2	33.73			IPI00030247	Cyclin-T1	SSSLNFSFPSLPTMGQMPGHSSDTSGLSFSQPSCK	Carbamidomethyl (C)-C34	34.58	1	1230.89	3689.64	3689.65	3	57
IPI00030247	Cyclin-T1	MRIPVAGGDKAASSKPEEIK		85.85	1	695.378	2083.11	2083.11	3	34.12			IPI00030247	Cyclin-T1	TRVPHSKLDK		34.41	1	394.232	1179.67	1179.67	3	21.24
IPI00030247	Cyclin-T1	QQAANLLQDMGQR		67.38	1	736.867	1471.72	1471.72	2	44.76			IPI00030247	Cyclin-T1	TSENLALTGVDHSLPQDGSNAFISQK		103.2	1	910.451	2728.33	2728.33	3	46.31
IPI00030247	Cyclin-T1	QQAANLLQDMGQR	Oxidation (M)-M10	38.52	1	744.863	1487.72	1487.71	2	34.69			IPI00030247	Cyclin-T1	TSENLALTGVDHSLPQDGSNAFISQKQNSK	Deamidation (NQ)-Q25	31.54	1	797.644	3186.54	3186.55	4	44.68
IPI00030247	Cyclin-T1	RGPSEETGGAVFDHPAK		95.87	1	585.621	1753.84	1753.84	3	31.39			IPI00030247	Cyclin-T1	TYSLSSSFSSSSSTR		82.75	1	792.363	1582.71	1582.71	2	39.17
IPI00030247	Cyclin-T1	RIWNWR		31.74	1	465.756	929.498	929.498	2	42.35			IPI00030247	Cyclin-T1	TYSLSSSFSSSSSTRK		60.56	1	856.41	1710.81	1710.81	2	37.11
IPI00030247	Cyclin-T1	SQYAYAAQNLLSHHDSHSSVILK		68.3	1	857.099	2568.27	2568.28	3	43.76			IPI00030247	Cyclin-T1	VHAAADKHNSVEDSVTK		110.58	1	904.452	1806.89	1806.89	2	24.66
IPI00030247	Cyclin-T1	SQYAYAAQNLLSHHDSHSSVILK	Deamidation (NQ)-N9	33.45	1	643.326	2569.26	2569.27	4	43.72			IPI00030247	Cyclin-T1	WLSSQPSFK		56.3	1	540.279	1078.54	1078.54	2	41.27
IPI00030247	Cyclin-T1	SQYAYAAQNLLSHHDSHSSVILK	Deamidation (NQ)-Q8	54.15	1	514.862	2569.26	2569.27	5	43.96			IPI00030247	Cyclin-T1	WLSSQPSFKLEPTQGHR		32.54	1	666.679	1997.01	1997.02	3	43.1
IPI00030247	Cyclin-T1	SSSLNFSFPSLPTMGQMPGHSSDTSGLSFSQPSCK	Carbamidomethyl (C)-C34	57.86	1	1230.89	3689.64	3689.65	3	57.04			IPI00017510	Cytochrome c oxidase subunit 2	IFEMGPVFTL		38.99	1	577.302	1152.59	1152.59	2	64.03
IPI00030247	Cyclin-T1	TRVPHSKLDK		30.89	1	394.232	1179.67	1179.68	3	21.09			IPI00017510	Cytochrome c oxidase subunit 2	ILYMTDEVNDPSLTIK		36.46	1	926.475	1850.93	1850.94	2	49.56
IPI00030247	Cyclin-T1	TSENLALTGVDHSLPQDGSNAFISQK		98.57	1	1365.18	2728.33	2728.34	2	46.14			IPI00295772	cytochrome P450 family 51	FAYVPFGAGR		41.94	1	542.782	1083.55	1083.55	2	46.8
IPI00030247	Cyclin-T1	TSENLALTGVDHSLPQDGSNAFISQK	Deamidation (NQ)-N20	77.25	1	910.78	2729.31	2729.32	3	45.8			IPI00295772	cytochrome P450 family 51	LDFNPDRYLQDNPASGEK		50.05	1	693.664	2077.97	2077.97	3	46.92
IPI00030247	Cyclin-T1	TSENLALTGVDHSLPQDGSNAFISQKQNSK	Deamidation (NQ)-Q25	41.33	1	797.644	3186.54	3186.55	4	44.47			IPI00456969	Cytoplasmic dynein 1 heavy chain 1	ILDDDTIITTLENLKR		40.18	1	625.015	1872.02	1872.02	3	59.13
IPI00030247	Cyclin-T1	TYSLSSSFSSSSSTR		81.75	1	792.366	1582.71	1582.72	2	39.06			IPI00456969	Cytoplasmic dynein 1 heavy chain 1	VLLTTQGVDMISK		41.34	1	702.892	1403.77	1403.77	2	46.27
IPI00030247	Cyclin-T1	TYSLSSSFSSSSSTRK		48.76	1	856.411	1710.81	1710.81	2	37.04			IPI00015213	Death-associated protein kinase 3	LRQELLK	Deamidation (NQ)-Q3	34.7	1	300.856	899.544	899.547	3	32.87
IPI00030247	Cyclin-T1	VHAAADKHNSVEDSVTK		111.43	1	904.452	1806.89	1806.89	2	24.64			IPI00015213	Death-associated protein kinase 3	RLRQELLK	Deamidation (NQ)-Q4	46.5	1	352.889	1055.65	1055.65	3	31.87
IPI00030247	Cyclin-T1	WLSSQPSFKLEPTQGHR		37.86	1	666.684	1997.01	1997.03	3	42.93			IPI00290410	Deoxynucleotidyltransferase terminal-interacting protein 2	ASIQAASAESSGQK		56.46	1	667.832	1333.65	1333.65	2	25.48
IPI00030247	Cyclin-T1	WYFTR		25.84	1	386.693	771.37	771.371	2	43.31			IPI00290410	Deoxynucleotidyltransferase terminal-interacting protein 2	QIVGTPVNSEDSDTR		68.94	1	809.39	1616.76	1616.77	2	31.94
IPI00465315	Cytochrome c	ADLIAYLK		47.03	1	453.768	905.522	905.522	2	49.64			IPI00027547	Dermcidin	GAVHDVKDVLDSVL		70.04	1	733.897	1465.78	1465.78	2	55.85
IPI00465315	Cytochrome c	ADLIAYLKK		20.66	1	517.816	1033.62	1033.62	2	44.85			IPI00027547	Dermcidin	KAVGGLGK		34.53	1	365.235	728.454	728.456	2	20.31
IPI00465315	Cytochrome c	TGPNLHGLFGRK		47.64	1	324.938	1295.71	1295.72	4	41.41			IPI00027547	Dermcidin	LGKDAVEDLESVGK		66.74	1	487.259	1458.76	1458.76	3	43.26
IPI00029264	Cytochrome c1 heme protein mitochondrial	AANNGALPPDLSYIVR		28.93	1	835.947	1669.88	1669.88	2	50.28			IPI00386975	desmocollin 1 isoform Dsc1a preproprotein	AASSQTPTMCTTTVTVK	Carbamidomethyl (C)-C10	37.14	1	892.434	1782.85	1782.85	2	34.52
IPI00029264	Cytochrome c1 heme protein mitochondrial	GLLSSLDHTSIR		71.49	1	649.857	1297.7	1297.7	2	46.26			IPI00386975	desmocollin 1 isoform Dsc1a preproprotein	AASSQTPTMCTTTVTVK	Oxidation (M)-M9|Carbamidomethyl (C)-C10	50.15	1	900.431	1798.84	1798.85	2	29.44
IPI00456969	Cytoplasmic dynein 1 heavy chain 1	ILDDDTIITTLENLKR		34.24	1	625.015	1872.02	1872.02	3	59.18			IPI00386975	desmocollin 1 isoform Dsc1a preproprotein	IEDDNDNAPYFEHR		53.38	1	578.916	1733.73	1733.73	3	35.59
IPI00456969	Cytoplasmic dynein 1 heavy chain 1	IQGLTVEQAEAVVR		95.07	1	756.924	1511.83	1511.83	2	45.96			IPI00386975	desmocollin 1 isoform Dsc1a preproprotein	MKVQDQDLPNTPHSK	Oxidation (M)-M1	41.78	1	585.289	1752.85	1752.85	3	27.75
IPI00456969	Cytoplasmic dynein 1 heavy chain 1	VLLTTQGVDMISK		86.36	1	702.892	1403.77	1403.77	2	46.21			IPI00386975	desmocollin 1 isoform Dsc1a preproprotein	VTATDLDEPDTLHTR		77.05	1	561.944	1682.81	1682.81	3	35.8
IPI00015213	Death-associated protein kinase 3	LRQELLK	Deamidation (NQ)-Q3	35.41	1	300.856	899.544	899.547	3	32.56			IPI00025753	Desmoglein-1	IHSDCAANQQVTYR	Carbamidomethyl (C)-C5	82.84	1	831.888	1661.76	1661.76	2	28.17
IPI00015213	Death-associated protein kinase 3	RLRQELLK	Deamidation (NQ)-Q4	58.94	1	352.89	1055.65	1055.65	3	31.55			IPI00025753	Desmoglein-1	ISGVGIDQPPYGIFVINQK		87.43	1	1023.06	2044.1	2044.11	2	54.91
IPI00550165	Dehydrogenase/reductase SDR family member 7B	VMETNYFGPVALTK		54.76	1	785.403	1568.79	1568.79	2	49.08			IPI00025753	Desmoglein-1	TMNNFLDREQYGQYALAVR	Oxidation (M)-M2	43.44	1	769.039	2304.1	2304.1	3	46.85
IPI00550165	Dehydrogenase/reductase SDR family member 7B	YGVMDTTTAQGR		82.49	1	650.304	1298.59	1298.59	2	32.02			IPI00025753	Desmoglein-1	YVMGNNPADLLAVDSR		96.5	1	867.928	1733.84	1733.84	2	50.06
IPI00290410	Deoxynucleotidyltransferase terminal-interacting protein 2	ASIQAASAESSGQK		89.45	1	667.831	1333.65	1333.65	2	25.44			IPI00003293	Diacylglycerol kinase epsilon	QWTPLIILANSR		17.12	1	706.408	1410.8	1410.8	2	59.15
IPI00290410	Deoxynucleotidyltransferase terminal-interacting protein 2	QIVGTPVNSEDSDTR		21.39	1	809.39	1616.76	1616.77	2	31.46			IPI00003293	Diacylglycerol kinase epsilon	SGTNMGEGLLGEFR		40.95	1	734.344	1466.68	1466.67	2	52.32
IPI00003293	Diacylglycerol kinase epsilon	QWTPLIILANSR		37.57	1	706.408	1410.8	1410.8	2	59.42			IPI00106642	Dihydropyrimidinase-like 2	AMEGIFIKPSVEPSAGHDEL		87.73	1	709.686	2126.04	2126.04	3	49.21
IPI00003293	Diacylglycerol kinase epsilon	SGTNMGEGLLGEFR		53.13	1	734.347	1466.68	1466.68	2	52.35			IPI00106642	Dihydropyrimidinase-like 2	AMEGIFIKPSVEPSAGHDEL	Oxidation (M)-M2	35.05	1	715.017	2142.03	2142.03	3	46.31
IPI00106642	Dihydropyrimidinase-like 2	AMEGIFIKPSVEPSAGHDEL		70.88	1	1064.03	2126.04	2126.04	2	49.19			IPI00106642	Dihydropyrimidinase-like 2	FQHVGTSVFLSVTGEQYGSPIR		51.68	1	803.75	2408.21	2408.23	3	51.12
IPI00106642	Dihydropyrimidinase-like 2	AMEGIFIKPSVEPSAGHDEL	Oxidation (M)-M2	36.62	1	715.021	2142.03	2142.04	3	45.89			IPI00106642	Dihydropyrimidinase-like 2	GQHEVHGMPSANTHNTWK		58.99	1	508.486	2029.92	2029.91	4	31.34
IPI00106642	Dihydropyrimidinase-like 2	FQHVGTSVFLSVTGEQYGSPIR		56.08	1	803.747	2408.21	2408.22	3	50.9			IPI00106642	Dihydropyrimidinase-like 2	GQHEVHGMPSANTHNTWK	Oxidation (M)-M8	73.66	1	512.483	2045.91	2045.9	4	29.58
IPI00106642	Dihydropyrimidinase-like 2	GQHEVHGMPSANTHNTWK		56.03	1	508.488	2029.92	2029.92	4	31.36			IPI00106642	Dihydropyrimidinase-like 2	IRGGSEGGCPR	Carbamidomethyl (C)-C9	67.85	1	573.278	1144.54	1144.54	2	16.25
IPI00106642	Dihydropyrimidinase-like 2	GQHEVHGMPSANTHNTWK	Oxidation (M)-M8	28.29	1	682.977	2045.91	2045.91	3	29.54			IPI00106642	Dihydropyrimidinase-like 2	VRLHSHDIK		30.76	1	368.882	1103.62	1103.62	3	23.11
IPI00106642	Dihydropyrimidinase-like 2	IRGGSEGGCPR	Carbamidomethyl (C)-C9	59.26	1	573.277	1144.54	1144.54	2	16.14			IPI00219434	Disks large-associated protein 3	GPAGAGPGPAPGTGTAPEPR		43.66	1	857.93	1713.84	1713.84	2	30
IPI00106642	Dihydropyrimidinase-like 2	VRLHSHDIK		36.58	1	552.817	1103.62	1103.62	2	22.98			IPI00219434	Disks large-associated protein 3	HASEPQPGPR		31.58	1	538.266	1074.52	1074.52	2	17.69
IPI00106642	Dihydropyrimidinase-like 2	YGSGSGQQSVTGVEASDDANSYWR		98.97	1	1261.05	2520.08	2520.09	2	41.84			IPI00219434	Disks large-associated protein 3	HLVHSVQK		19.93	1	474.273	946.535	946.531	2	17.38
IPI00008195	distal-less homeobox 6	AELAASLGLTQTQVK		114.17	1	765.435	1528.85	1528.86	2	45.47			IPI00219434	Disks large-associated protein 3	QLPVQQDGFHTLPYQR		31.9	1	642.999	1925.97	1925.97	3	43.08
IPI00008195	distal-less homeobox 6	FQQTQYLALPER		46.06	1	747.392	1492.77	1492.77	2	44.13			IPI00219434	Disks large-associated protein 3	SHSLEAPGKR		43.18	1	361.197	1080.57	1080.57	3	21.71
IPI00008195	distal-less homeobox 6	GDDTDQQKTTVIENGEIR	Deamidation (NQ)-N14	29.85	1	673.987	2018.94	2018.94	3	33.09			IPI00219434	Disks large-associated protein 3	SHSYLR		18.94	1	381.699	761.382	761.383	2	23.94
IPI00008195	distal-less homeobox 6	GDDTDQQKTTVIENGEIR		94.2	1	1009.99	2017.96	2017.96	2	33.75			IPI00219434	Disks large-associated protein 3	TVHTQGQWAYR		34.12	1	673.833	1345.65	1345.65	2	33.06
IPI00008195	distal-less homeobox 6	IWFQNKR		35.59	1	496.281	990.54	990.547	2	37.77			IPI00008195	distal-less homeobox 6	AELAASLGLTQTQVK		111.41	1	765.432	1528.85	1528.85	2	45.65
IPI00008195	distal-less homeobox 6	QGSNPHESDPLQGSAALSPR		74.03	1	683.336	2046.97	2046.99	3	36.99			IPI00008195	distal-less homeobox 6	FQQTQYLALPERAELAASLGLTQTQVK		35.06	1	1002.21	3003.6	3003.61	3	56.16
IPI00008195	distal-less homeobox 6	SLAAYPYMSHSQHSPYLQSYHNSSAAAQTR		104.19	1	1118.52	3352.53	3352.55	3	40.13			IPI00008195	distal-less homeobox 6	GDDTDQQKTTVIENGEIR	Deamidation (NQ)-N14	53.21	1	673.986	2018.94	2018.94	3	33.46
IPI00008195	distal-less homeobox 6	SPALPPVWDVSASAK		50.07	1	762.91	1523.8	1523.81	2	48.53			IPI00008195	distal-less homeobox 6	IWFQNKR		34.92	1	331.188	990.54	990.544	3	38.09
IPI00008195	distal-less homeobox 6	TIYSSLQLQALNHR		63.59	1	822.448	1642.88	1642.88	2	45.52			IPI00008195	distal-less homeobox 6	QGSNPHESDPLQGSAALSPR		89.54	1	1024.49	2046.97	2046.98	2	37.49
IPI00008195	distal-less homeobox 6	TQYLALPER		66.55	1	545.798	1089.58	1089.58	2	41.53			IPI00008195	distal-less homeobox 6	SLAAYPYMSHSQHSPYLQSYHNSSAAAQTR		101.18	1	1118.52	3352.53	3352.54	3	39.91
IPI00008195	distal-less homeobox 6	TQYLALPERAELAASLGLTQTQVK		61.84	1	1301.22	2600.42	2600.43	2	54.38			IPI00008195	distal-less homeobox 6	SLAAYPYMSHSQHSPYLQSYHNSSAAAQTR	Oxidation (M)-M8	63.85	1	843.14	3368.53	3368.53	4	37.32
IPI00413611	DNA topoisomerase 1	DEDDADYKPK		47.8	1	598.259	1194.5	1194.5	2	22.46			IPI00008195	distal-less homeobox 6	SLAAYPYMSHSQHSPYLQSYHNSSAAAQTRGDDTDQQK		27.3	1	848.988	4239.89	4239.9	5	39.06
IPI00413611	DNA topoisomerase 1	DEDDADYKPKK		33.83	1	662.308	1322.6	1322.6	2	19.32			IPI00008195	distal-less homeobox 6	SPALPPVWDVSASAK		32.09	1	762.907	1523.8	1523.8	2	48.76
IPI00413611	DNA topoisomerase 1	ELTAPDENIPAK		48.22	1	649.335	1296.66	1296.66	2	34.44			IPI00008195	distal-less homeobox 6	TQYLALPERAELAASLGLTQTQVK		57.78	1	1301.22	2600.42	2600.43	2	54.56
IPI00413611	DNA topoisomerase 1	GPVFAPPYEPLPENVK		40.16	1	877.463	1752.91	1752.91	2	48.07			IPI00008195	distal-less homeobox 6	TTVIENGEIR		41.98	1	566.302	1130.59	1130.59	2	34.36
IPI00413611	DNA topoisomerase 1	HLQDLMEGLTAK		82.26	1	678.353	1354.69	1354.69	2	46.55			IPI00008195	distal-less homeobox 6	TTVIENGEIR	Deamidation (NQ)-N6	17.05	1	566.795	1131.58	1131.58	2	33.13
IPI00413611	DNA topoisomerase 1	IKGEKDWQK		32.68	1	377.877	1130.61	1130.61	3	24.05			IPI00413611	DNA topoisomerase 1	AVALYFIDK		20.17	1	520.298	1038.57	1038.58	2	49.55
IPI00413611	DNA topoisomerase 1	IKGEKDWQKYETAR		68	1	584.641	1750.9	1750.9	3	32.37			IPI00413611	DNA topoisomerase 1	DEDDADYKPK		39.26	1	598.259	1194.5	1194.5	2	22.79
IPI00413611	DNA topoisomerase 1	KLEEEEDGK		65.28	1	538.759	1075.5	1075.5	2	17.49			IPI00413611	DNA topoisomerase 1	ELTAPDENIPAK		42.47	1	649.336	1296.66	1296.66	2	34.65
IPI00413611	DNA topoisomerase 1	KLEEEEDGKLKKPK		75.55	1	557.648	1669.92	1669.92	3	24.4			IPI00413611	DNA topoisomerase 1	EQLADARR		23.75	1	479.757	957.499	957.499	2	21.45
IPI00413611	DNA topoisomerase 1	KVPEPDNK		33.28	1	463.751	925.487	925.487	2	17.72			IPI00413611	DNA topoisomerase 1	GPVFAPPYEPLPENVK		40.61	1	877.464	1752.91	1752.91	2	48.04
IPI00413611	DNA topoisomerase 1	KVPEPDNKK		36.91	1	352.202	1053.58	1053.58	3	15.25			IPI00413611	DNA topoisomerase 1	IANFKIEPPGLFR		29.24	1	501.291	1500.85	1500.85	3	51.42
IPI00413611	DNA topoisomerase 1	LEEQLMK		38.94	1	445.737	889.458	889.459	2	33.47			IPI00413611	DNA topoisomerase 1	IKGEKDWQK		29.11	1	377.877	1130.61	1130.61	3	24.21
IPI00413611	DNA topoisomerase 1	LEVQATDREENKQIALGTSK		98.64	1	1115.59	2229.16	2229.17	2	34.59			IPI00413611	DNA topoisomerase 1	KEEEQKWK		22.36	1	552.788	1103.56	1103.56	2	19.66
IPI00413611	DNA topoisomerase 1	LKIKEENEK		55.15	1	565.825	1129.63	1129.64	2	22.93			IPI00413611	DNA topoisomerase 1	KEQLADAR		41.59	1	465.754	929.493	929.493	2	20.7
IPI00413611	DNA topoisomerase 1	MGMLKR		20.04	1	368.204	734.393	734.394	2	28.29			IPI00413611	DNA topoisomerase 1	KLEEEEDGKLK		32.57	1	659.349	1316.68	1316.68	2	26.09
IPI00413611	DNA topoisomerase 1	MLDHEYTTK		57.63	1	569.267	1136.52	1136.52	2	27.51			IPI00413611	DNA topoisomerase 1	KLEEEEDGKLKKPK		49.9	1	557.648	1669.92	1669.92	3	24.42
IPI00413611	DNA topoisomerase 1	MLDHEYTTK	Oxidation (M)-M1	23.52	1	577.263	1152.51	1152.51	2	24.38			IPI00413611	DNA topoisomerase 1	LEVQATDREENKQIALGTSK		64.17	1	744.061	2229.16	2229.16	3	34.61
IPI00413611	DNA topoisomerase 1	RPRDEDDADYKPK		46.53	1	401.948	1603.76	1603.76	4	21.43			IPI00413611	DNA topoisomerase 1	LKIKEENEK		46.45	1	565.825	1129.63	1129.63	2	23.27
IPI00413611	DNA topoisomerase 1	SMMNLQTK		23.07	1	476.733	951.452	951.451	2	34.8			IPI00413611	DNA topoisomerase 1	LNYLDPR		26.39	1	445.74	889.466	889.466	2	37.9
IPI00413611	DNA topoisomerase 1	TYNASITLQQQLK		70.09	1	754.411	1506.8	1506.81	2	41.7			IPI00413611	DNA topoisomerase 1	MLDHEYTTK		34.12	1	569.266	1136.52	1136.52	2	27.77
IPI00413611	DNA topoisomerase 1	WWEEERYPEGIK		59.68	1	811.386	1620.76	1620.76	2	43.59			IPI00413611	DNA topoisomerase 1	TYNASITLQQQLK		44.2	1	754.41	1506.8	1506.81	2	41.98
IPI00413611	DNA topoisomerase 1	YIMLNPSSR		46.81	1	540.779	1079.54	1079.54	2	39.55			IPI00025874	Dolichyl-diphosphooligosaccharide--protein glycosyltransferase 67 kDa subunit precursor	ALTSEIALLQSR		20.99	1	434.586	1300.74	1300.74	3	49.38
IPI00025874	Dolichyl-diphosphooligosaccharide--protein glycosyltransferase 67 kDa subunit precursor	ALTSEIALLQSR		28.72	1	434.586	1300.74	1300.74	3	49.14			IPI00025874	Dolichyl-diphosphooligosaccharide--protein glycosyltransferase 67 kDa subunit precursor	APDELHYTYLDTFGRPVIVAYKK		39.52	1	899.478	2695.4	2695.41	3	49.38
IPI00025874	Dolichyl-diphosphooligosaccharide--protein glycosyltransferase 67 kDa subunit precursor	ATSFLLALEPELEAR		88.28	1	830.453	1658.89	1658.89	2	60.23			IPI00025874	Dolichyl-diphosphooligosaccharide--protein glycosyltransferase 67 kDa subunit precursor	ATSFLLALEPELEAR		48.35	1	830.453	1658.89	1658.89	2	60.23
IPI00025874	Dolichyl-diphosphooligosaccharide--protein glycosyltransferase 67 kDa subunit precursor	DISTLNSGKK		29.39	1	531.793	1061.57	1061.57	2	25.96			IPI00025874	Dolichyl-diphosphooligosaccharide--protein glycosyltransferase 67 kDa subunit precursor	DISTLNSGKK		53.41	1	354.866	1061.57	1061.58	3	25.83
IPI00025874	Dolichyl-diphosphooligosaccharide--protein glycosyltransferase 67 kDa subunit precursor	DTYIENEKLISGK		72.49	1	755.395	1508.77	1508.77	2	37.95			IPI00025874	Dolichyl-diphosphooligosaccharide--protein glycosyltransferase 67 kDa subunit precursor	DTYIENEKLISGK		50.6	1	755.394	1508.77	1508.77	2	38.54
IPI00025874	Dolichyl-diphosphooligosaccharide--protein glycosyltransferase 67 kDa subunit precursor	DVPAYSQDTFK		19.32	1	635.806	1269.59	1269.6	2	36.5			IPI00025874	Dolichyl-diphosphooligosaccharide--protein glycosyltransferase 67 kDa subunit precursor	DVPAYSQDTFK		31.86	1	635.801	1269.59	1269.59	2	36.47
IPI00025874	Dolichyl-diphosphooligosaccharide--protein glycosyltransferase 67 kDa subunit precursor	FVDHVFDEQVIDSLTVK		100.93	1	996.011	1990	1990.01	2	54.27			IPI00025874	Dolichyl-diphosphooligosaccharide--protein glycosyltransferase 67 kDa subunit precursor	FPLFGGWK		24.67	1	476.259	950.501	950.503	2	55.96
IPI00025874	Dolichyl-diphosphooligosaccharide--protein glycosyltransferase 67 kDa subunit precursor	GEDEEENNLEVR		52.22	1	716.814	1431.61	1431.61	2	31.13			IPI00025874	Dolichyl-diphosphooligosaccharide--protein glycosyltransferase 67 kDa subunit precursor	FVDHVFDEQVIDSLTVK		101.01	1	996.012	1990	1990.01	2	54.29
IPI00025874	Dolichyl-diphosphooligosaccharide--protein glycosyltransferase 67 kDa subunit precursor	HFDETVNR		26.08	1	509.24	1016.47	1016.47	2	26.13			IPI00025874	Dolichyl-diphosphooligosaccharide--protein glycosyltransferase 67 kDa subunit precursor	GEDEEENNLEVR		57.23	1	716.813	1431.61	1431.61	2	31.15
IPI00025874	Dolichyl-diphosphooligosaccharide--protein glycosyltransferase 67 kDa subunit precursor	HTGAVLKGPFSR		52.29	1	635.356	1268.7	1268.7	2	36.41			IPI00025874	Dolichyl-diphosphooligosaccharide--protein glycosyltransferase 67 kDa subunit precursor	HFDETVNR		58.13	1	509.241	1016.47	1016.47	2	26.25
IPI00025874	Dolichyl-diphosphooligosaccharide--protein glycosyltransferase 67 kDa subunit precursor	KDTYIENEK		58.3	1	570.283	1138.55	1138.55	2	24.4			IPI00025874	Dolichyl-diphosphooligosaccharide--protein glycosyltransferase 67 kDa subunit precursor	HTGAVLKGPFSR		25.08	1	635.356	1268.7	1268.7	2	36.71
IPI00025874	Dolichyl-diphosphooligosaccharide--protein glycosyltransferase 67 kDa subunit precursor	LAHLGVQVK		57.31	1	322.203	963.587	963.588	3	34.49			IPI00025874	Dolichyl-diphosphooligosaccharide--protein glycosyltransferase 67 kDa subunit precursor	IDHILDAL		15.11	1	455.26	908.497	908.505	2	49.41
IPI00025874	Dolichyl-diphosphooligosaccharide--protein glycosyltransferase 67 kDa subunit precursor	LAHLGVQVKGEDEEENNLEVR		93.55	1	793.405	2377.19	2377.19	3	39.48			IPI00025874	Dolichyl-diphosphooligosaccharide--protein glycosyltransferase 67 kDa subunit precursor	ISVIVETVYTHVLHPYPTQITQSEK		71.21	1	961.516	2881.52	2881.53	3	56.56
IPI00025874	Dolichyl-diphosphooligosaccharide--protein glycosyltransferase 67 kDa subunit precursor	LKKDTYIENEK		40.63	1	690.872	1379.73	1379.73	2	25.74			IPI00025874	Dolichyl-diphosphooligosaccharide--protein glycosyltransferase 67 kDa subunit precursor	KDTYIENEK		57.23	1	570.283	1138.55	1138.55	2	24.47
IPI00025874	Dolichyl-diphosphooligosaccharide--protein glycosyltransferase 67 kDa subunit precursor	LPVALDPGAK		20.72	1	490.792	979.57	979.57	2	39.34			IPI00025874	Dolichyl-diphosphooligosaccharide--protein glycosyltransferase 67 kDa subunit precursor	LAHLGVQVK		46.53	1	322.203	963.587	963.587	3	34.61
IPI00025874	Dolichyl-diphosphooligosaccharide--protein glycosyltransferase 67 kDa subunit precursor	NIEIDSPYEISR		70.54	1	718.357	1434.7	1434.7	2	43.79			IPI00025874	Dolichyl-diphosphooligosaccharide--protein glycosyltransferase 67 kDa subunit precursor	LAHLGVQVKGEDEEENNLEVR		84.76	1	595.305	2377.19	2377.19	4	39.19
IPI00025874	Dolichyl-diphosphooligosaccharide--protein glycosyltransferase 67 kDa subunit precursor	QFVVFEGNHYFYSPYPTK		43.01	1	741.691	2222.05	2222.05	3	51.42			IPI00025874	Dolichyl-diphosphooligosaccharide--protein glycosyltransferase 67 kDa subunit precursor	LKKDTYIENEKLISGK		59.56	1	627.022	1878.05	1878.05	3	35.41
IPI00025874	Dolichyl-diphosphooligosaccharide--protein glycosyltransferase 67 kDa subunit precursor	QPDSGISSIR		21.23	1	530.276	1058.54	1058.54	2	31.83			IPI00025874	Dolichyl-diphosphooligosaccharide--protein glycosyltransferase 67 kDa subunit precursor	LPVALDPGAK		36.15	1	490.792	979.57	979.569	2	39.41
IPI00025874	Dolichyl-diphosphooligosaccharide--protein glycosyltransferase 67 kDa subunit precursor	SEDLLDYGPFR		68.21	1	656.315	1310.61	1310.62	2	52.58			IPI00025874	Dolichyl-diphosphooligosaccharide--protein glycosyltransferase 67 kDa subunit precursor	NIEIDSPYEISR		64.61	1	718.361	1434.7	1434.71	2	43.59
IPI00025874	Dolichyl-diphosphooligosaccharide--protein glycosyltransferase 67 kDa subunit precursor	SLETEHK		40.01	1	422.214	842.413	842.414	2	15.88			IPI00025874	Dolichyl-diphosphooligosaccharide--protein glycosyltransferase 67 kDa subunit precursor	QFVVFEGNHYFYSPYPTK		53.48	1	1112.04	2222.05	2222.06	2	51.32
IPI00025874	Dolichyl-diphosphooligosaccharide--protein glycosyltransferase 67 kDa subunit precursor	THYIVGYNLPSYEYLYNLGDQYALK		92.49	1	999.831	2996.46	2996.47	3	58.64			IPI00025874	Dolichyl-diphosphooligosaccharide--protein glycosyltransferase 67 kDa subunit precursor	QPDSGISSIR		50.02	1	530.275	1058.54	1058.54	2	31.87
IPI00025874	Dolichyl-diphosphooligosaccharide--protein glycosyltransferase 67 kDa subunit precursor	TILPAAAQDVYYR		42.48	1	740.893	1479.77	1479.77	2	45.08			IPI00025874	Dolichyl-diphosphooligosaccharide--protein glycosyltransferase 67 kDa subunit precursor	RQELVTK		42.28	1	437.262	872.508	872.509	2	21.36
IPI00025874	Dolichyl-diphosphooligosaccharide--protein glycosyltransferase 67 kDa subunit precursor	VHYENNSPFLTITSMTR		91.17	1	1005.49	2008.97	2008.97	2	52.05			IPI00025874	Dolichyl-diphosphooligosaccharide--protein glycosyltransferase 67 kDa subunit precursor	SEDLLDYGPFR		84.15	1	656.315	1310.61	1310.62	2	52.99
IPI00025874	Dolichyl-diphosphooligosaccharide--protein glycosyltransferase 67 kDa subunit precursor	VSEMQKLDAQVK		54.64	1	688.367	1374.72	1374.72	2	36.91			IPI00025874	Dolichyl-diphosphooligosaccharide--protein glycosyltransferase 67 kDa subunit precursor	SLETEHK		37.47	1	422.214	842.413	842.414	2	16.24
IPI00025874	Dolichyl-diphosphooligosaccharide--protein glycosyltransferase 67 kDa subunit precursor	VTAEVVLAHLGGGSTSR		117.48	1	827.452	1652.88	1652.89	2	46.41			IPI00025874	Dolichyl-diphosphooligosaccharide--protein glycosyltransferase 67 kDa subunit precursor	THYIVGYNLPSYEYLYNLGDQYALK		92.01	1	1499.24	2996.46	2996.47	2	58.71
IPI00025874	Dolichyl-diphosphooligosaccharide--protein glycosyltransferase 67 kDa subunit precursor	YDYQRQPDSGISSIR		79.78	1	892.934	1783.85	1783.85	2	35.86			IPI00025874	Dolichyl-diphosphooligosaccharide--protein glycosyltransferase 67 kDa subunit precursor	TILPAAAQDVYYR		33.7	1	740.894	1479.77	1479.77	2	45.22
IPI00844076	Dolichyl-diphosphooligosaccharide--protein glycosyltransferase subunit 2	ISTEVGITNVDLSTVDKDQSIAPK		88.36	1	1265.67	2529.32	2529.33	2	45.73			IPI00025874	Dolichyl-diphosphooligosaccharide--protein glycosyltransferase 67 kDa subunit precursor	TVDLSSHLAK		62.19	1	535.796	1069.58	1069.58	2	33.64
IPI00844076	Dolichyl-diphosphooligosaccharide--protein glycosyltransferase subunit 2	KNFESLSEAFSVASAAAVLSHNR		85.01	1	812.416	2434.22	2434.22	3	56.38			IPI00025874	Dolichyl-diphosphooligosaccharide--protein glycosyltransferase 67 kDa subunit precursor	VHYENNSPFLTITSMTR		121.56	1	1005.49	2008.97	2008.97	2	51.98
IPI00844076	Dolichyl-diphosphooligosaccharide--protein glycosyltransferase subunit 2	LQVTNVLSQPLTQATVK		80	1	920.532	1839.05	1839.05	2	49.03			IPI00025874	Dolichyl-diphosphooligosaccharide--protein glycosyltransferase 67 kDa subunit precursor	VSEMQKLDAQVK		71.84	1	688.368	1374.72	1374.72	2	37.13
IPI00844076	Dolichyl-diphosphooligosaccharide--protein glycosyltransferase subunit 2	LSKEETVLATVQALQTASHLSQQADLR		87.53	1	979.862	2936.56	2936.56	3	56.04			IPI00025874	Dolichyl-diphosphooligosaccharide--protein glycosyltransferase 67 kDa subunit precursor	VTAEVVLAHLGGGSTSR		92.77	1	827.451	1652.88	1652.89	2	46.66
IPI00844076	Dolichyl-diphosphooligosaccharide--protein glycosyltransferase subunit 2	NFESLSEAFSVASAAAVLSHNR		39.5	1	769.718	2306.13	2306.13	3	60.57			IPI00025874	Dolichyl-diphosphooligosaccharide--protein glycosyltransferase 67 kDa subunit precursor	YDYQRQPDSGISSIR		63.03	1	595.623	1783.85	1783.85	3	36.04
IPI00844076	Dolichyl-diphosphooligosaccharide--protein glycosyltransferase subunit 2	QEIQHLFR		40.88	1	357.53	1069.57	1069.57	3	39.06			IPI00844076	Dolichyl-diphosphooligosaccharide--protein glycosyltransferase subunit 2	ISTEVGITNVDLSTVDKDQSIAPK		106.83	1	1265.67	2529.32	2529.32	2	46.07
IPI00844076	Dolichyl-diphosphooligosaccharide--protein glycosyltransferase subunit 2	SIVEEIEDLVAR		91.95	1	686.87	1371.72	1371.73	2	64.77			IPI00844076	Dolichyl-diphosphooligosaccharide--protein glycosyltransferase subunit 2	LQVTNVLSQPLTQATVK		67.86	1	920.532	1839.05	1839.05	2	49.19
IPI00844076	Dolichyl-diphosphooligosaccharide--protein glycosyltransferase subunit 2	TGQEVVFVAEPDNKNVYK		86.13	1	1019.02	2036.02	2036.03	2	40.57			IPI00844076	Dolichyl-diphosphooligosaccharide--protein glycosyltransferase subunit 2	LSKEETVLATVQALQTASHLSQQADLR		118.44	1	979.865	2936.56	2936.57	3	56.05
IPI00844076	Dolichyl-diphosphooligosaccharide--protein glycosyltransferase subunit 2	TSFTPVGDVFELNFMNVK		101.65	1	1023.01	2044	2044	2	63.12			IPI00844076	Dolichyl-diphosphooligosaccharide--protein glycosyltransferase subunit 2	NFESLSEAFSVASAAAVLSHNR		77.63	1	769.718	2306.13	2306.13	3	60.52
IPI00844076	Dolichyl-diphosphooligosaccharide--protein glycosyltransferase subunit 2	TSFTPVGDVFELNFMNVK	Oxidation (M)-M15	117.54	1	1031.01	2059.99	2060	2	59.37			IPI00844076	Dolichyl-diphosphooligosaccharide--protein glycosyltransferase subunit 2	NVYKFELDTSER		53.42	1	750.87	1499.73	1499.73	2	41.77
IPI00844076	Dolichyl-diphosphooligosaccharide--protein glycosyltransferase subunit 2	VKISTEVGITNVDLSTVDKDQSIAPK		74.36	1	919.835	2756.48	2756.48	3	46.08			IPI00844076	Dolichyl-diphosphooligosaccharide--protein glycosyltransferase subunit 2	SIVEEIEDLVAR		88.35	1	686.87	1371.72	1371.73	2	64.81
IPI00297492	Dolichyl-diphosphooligosaccharide--protein glycosyltransferase subunit STT3A	FGQVYTEAK		44.85	1	521.763	1041.51	1041.51	2	31.88			IPI00844076	Dolichyl-diphosphooligosaccharide--protein glycosyltransferase subunit 2	SNLDPSNVDSLFYAAQASQALSGCEISISNETK	Carbamidomethyl (C)-C24	23.59	1	1172.89	3515.64	3515.64	3	57.28
IPI00297492	Dolichyl-diphosphooligosaccharide--protein glycosyltransferase subunit STT3A	IIFDDFR		18.14	1	463.242	924.471	924.47	2	48.44			IPI00844076	Dolichyl-diphosphooligosaccharide--protein glycosyltransferase subunit 2	TGQEVVFVAEPDNKNVYK		83.67	1	1019.02	2036.02	2036.03	2	40.73
IPI00152377	Dolichyl-diphosphooligosaccharide--protein glycosyltransferase subunit STT3B	FGEMQLDFR		61.36	1	571.769	1141.52	1141.52	2	48.85			IPI00844076	Dolichyl-diphosphooligosaccharide--protein glycosyltransferase subunit 2	TSFTPVGDVFELNFMNVK		125.04	1	1023.01	2044	2044	2	62.93
IPI00152377	Dolichyl-diphosphooligosaccharide--protein glycosyltransferase subunit STT3B	NAEIGNKDIK		43.12	1	551.299	1100.58	1100.58	2	25.63			IPI00844076	Dolichyl-diphosphooligosaccharide--protein glycosyltransferase subunit 2	TSFTPVGDVFELNFMNVK	Oxidation (M)-M15	71.31	1	1031.01	2059.99	2060	2	59.26
IPI00152377	Dolichyl-diphosphooligosaccharide--protein glycosyltransferase subunit STT3B	SSLNSSPWSGLMALGNSR	Deamidation (NQ)-N16	42.96	1	932.949	1863.88	1863.88	2	57.28			IPI00844076	Dolichyl-diphosphooligosaccharide--protein glycosyltransferase subunit 2	VKISTEVGITNVDLSTVDKDQSIAPK		78.66	1	919.836	2756.48	2756.48	3	46.14
IPI00297084	dolichyl-diphosphooligosaccharide-protein glycosyltransferase precursor	TLVLLDNLNVR		85.95	1	635.38	1268.75	1268.75	2	53.5			IPI00297084	dolichyl-diphosphooligosaccharide-protein glycosyltransferase precursor	GVGMVADPDNPLVLDILTGSSTSYSFFPDKPITQYPHAVGK		52.48	1	1084.3	4333.16	4333.17	4	64.7
IPI00297084	dolichyl-diphosphooligosaccharide-protein glycosyltransferase precursor	WVFKEEGVLR		50.17	1	631.848	1261.68	1261.68	2	45.95			IPI00297084	dolichyl-diphosphooligosaccharide-protein glycosyltransferase precursor	SSLNPILFR		64.82	1	523.803	1045.59	1045.59	2	49.16
IPI00297084	dolichyl-diphosphooligosaccharide-protein glycosyltransferase precursor	YSQTGNYELAVALSR		109.5	1	836.422	1670.83	1670.83	2	47.08			IPI00297084	dolichyl-diphosphooligosaccharide-protein glycosyltransferase precursor	TLVLLDNLNVR		88.48	1	635.38	1268.75	1268.75	2	53.73
IPI00002506	Dolichyl-phosphate beta-glucosyltransferase	MGIFSSR		41.15	1	399.203	796.39	796.391	2	40.79			IPI00297084	dolichyl-diphosphooligosaccharide-protein glycosyltransferase precursor	WVFKEEGVLR		54.93	1	421.568	1261.68	1261.68	3	45.8
IPI00002506	Dolichyl-phosphate beta-glucosyltransferase	QLSVVVPSYNEEK		15.07	1	746.389	1490.76	1490.76	2	42.11			IPI00297084	dolichyl-diphosphooligosaccharide-protein glycosyltransferase precursor	WVPFDGDDIQLEFVR		21.18	1	918.454	1834.89	1834.89	2	59.23
IPI00221325	E3 SUMO-protein ligase RanBP2	APGTNVAMASNQAVR		82.07	1	743.876	1485.74	1485.74	2	31.97			IPI00002506	Dolichyl-phosphate beta-glucosyltransferase	GQKETLPSIWDSPTK		32.49	1	562.961	1685.86	1685.86	3	45.16
IPI00221325	E3 SUMO-protein ligase RanBP2	ELLQSFDSALQSVK		71.53	1	782.916	1563.81	1563.82	2	55.53			IPI00002506	Dolichyl-phosphate beta-glucosyltransferase	ILMADADGATKFPDVEKLEK		69.42	1	731.048	2190.12	2190.12	3	46.5
IPI00221325	E3 SUMO-protein ligase RanBP2	GVIFGQTSSTFTFADLAK		93.1	1	945.489	1888.96	1888.96	2	57.12			IPI00002506	Dolichyl-phosphate beta-glucosyltransferase	MGIFSSR		39.46	1	399.203	796.39	796.392	2	40.95
IPI00221325	E3 SUMO-protein ligase RanBP2	LLVQHEINTLR		81.53	1	668.39	1334.77	1334.77	2	41.15			IPI00002506	Dolichyl-phosphate beta-glucosyltransferase	QLSVVVPSYNEEK		47.66	1	746.39	1490.76	1490.76	2	42.31
IPI00221325	E3 SUMO-protein ligase RanBP2	NVSGISFTENMGSSQQK		16.07	1	907.426	1812.83	1812.84	2	41.78			IPI00180143	Dual specificity protein kinase CLK4	ITLDEALQHPFFDLLK		46.15	1	634.012	1899.01	1899.02	3	64.36
IPI00221325	E3 SUMO-protein ligase RanBP2	QNQTTAISTPASSEISK		41.21	1	881.945	1761.87	1761.88	2	33.66			IPI00180143	Dual specificity protein kinase CLK4	ITLDEALQHPFFDLLK	Deamidation (NQ)-Q8	23.9	1	634.346	1900	1900.02	3	64.34
IPI00221325	E3 SUMO-protein ligase RanBP2	QNQTTSAVSTPASSETSK		70.19	1	912.437	1822.85	1822.86	2	26.5			IPI00221325	E3 SUMO-protein ligase RanBP2	APGTNVAMASNQAVR		74.81	1	743.876	1485.74	1485.74	2	32.28
IPI00221325	E3 SUMO-protein ligase RanBP2	QNQTTSAVSTPASSETSKAPK		36.08	1	707.355	2119.04	2119.04	3	27.76			IPI00221325	E3 SUMO-protein ligase RanBP2	ELLQSFDSALQSVK		72.11	1	782.916	1563.81	1563.82	2	55.69
IPI00221325	E3 SUMO-protein ligase RanBP2	SGFEGMFTKK		28.46	1	566.278	1130.54	1130.54	2	42.54			IPI00221325	E3 SUMO-protein ligase RanBP2	FGHVDQENSPSFMFQGSSNTEFK		50.24	1	874.053	2619.13	2619.14	3	47.97
IPI00221325	E3 SUMO-protein ligase RanBP2	SGQSALYDALFSSQSPK		54.34	1	595.96	1784.86	1784.86	3	52.66			IPI00221325	E3 SUMO-protein ligase RanBP2	GHVSLAAELSK		17.99	1	556.309	1110.6	1110.6	2	38.16
IPI00221325	E3 SUMO-protein ligase RanBP2	SGSSFVHQASFK		80.04	1	641.313	1280.61	1280.61	2	34.71			IPI00221325	E3 SUMO-protein ligase RanBP2	GVIFGQTSSTFTFADLAK		96.49	1	945.487	1888.96	1888.96	2	56.9
IPI00221325	E3 SUMO-protein ligase RanBP2	SNNSETSSVAQSGSESKVEPK		40.61	1	718.006	2150.99	2151	3	27			IPI00221325	E3 SUMO-protein ligase RanBP2	NSDIEQSSDSKVK		63.64	1	718.848	1435.68	1435.68	2	23.79
IPI00221325	E3 SUMO-protein ligase RanBP2	YIASVQGSTPSPR		63.4	1	681.854	1361.69	1361.69	2	31.76			IPI00221325	E3 SUMO-protein ligase RanBP2	NVSGISFTENMGSSQQK		21.29	1	907.43	1812.83	1812.84	2	41.99
IPI00290429	E3 ubiquitin-protein ligase Hakai	APPGDEEGFDYNEEERYDCK	Carbamidomethyl (C)-C19	44.5	1	807.329	2418.95	2418.96	3	37.08			IPI00221325	E3 SUMO-protein ligase RanBP2	QNQTTAISTPASSEISK		60.76	1	881.945	1761.87	1761.88	2	33.69
IPI00290429	E3 ubiquitin-protein ligase Hakai	DLQAHINHR		50.47	1	552.289	1102.56	1102.56	2	26.7			IPI00221325	E3 SUMO-protein ligase RanBP2	QNQTTSAVSTPASSETSK		77.19	1	912.438	1822.85	1822.86	2	26.61
IPI00290429	E3 ubiquitin-protein ligase Hakai	GGELFANQR		43.63	1	496.251	990.488	990.487	2	34.39			IPI00221325	E3 SUMO-protein ligase RanBP2	QNQTTSAVSTPASSETSKAPK		55.19	1	707.354	2119.04	2119.04	3	28.09
IPI00290429	E3 ubiquitin-protein ligase Hakai	HSNLITVPIQDDSNSGAR		63.21	1	962.483	1922.94	1922.95	2	40.25			IPI00221325	E3 SUMO-protein ligase RanBP2	SGFEGMFTKK		22.64	1	566.279	1130.54	1130.54	2	42.95
IPI00290429	E3 ubiquitin-protein ligase Hakai	HVFCYDCAILHEK	Carbamidomethyl (C)-C4|Carbamidomethyl (C)-C7	35.44	1	564.593	1690.76	1690.76	3	41.08			IPI00221325	E3 SUMO-protein ligase RanBP2	SGQSALYDALFSSQSPK		97.95	1	893.43	1784.86	1784.85	2	52.77
IPI00290429	E3 ubiquitin-protein ligase Hakai	MCPGCSDPVQR	Carbamidomethyl (C)-C2|Carbamidomethyl (C)-C5	32.8	1	653.77	1305.53	1305.53	2	28.09			IPI00221325	E3 SUMO-protein ligase RanBP2	SGSSFVHQASFK		55.15	1	641.315	1280.61	1280.62	2	35.11
IPI00290429	E3 ubiquitin-protein ligase Hakai	RGPPPPPR		37.9	1	437.256	872.498	872.497	2	21.15			IPI00221325	E3 SUMO-protein ligase RanBP2	SNNSETSSVAQSGSESKVEPK		54.89	1	718.006	2150.99	2151	3	27.08
IPI00026993	E3 ubiquitin-protein ligase RING2	TKTSDDSGLELDNNNAAMAIDPVMDGASEIELVFRPHPTLMEKDDSAQTR		26.31	1	1089.92	5444.54	5444.55	5	62.35			IPI00221325	E3 SUMO-protein ligase RanBP2	YIASVQGSTPSPR		66.9	1	681.854	1361.69	1361.69	2	32.09
IPI00026993	E3 ubiquitin-protein ligase RING2	TSDDSGLELDNNNAAMAIDPVMDGASEIELVFRPHPTLMEKDDSAQTR		57.43	1	1304.86	5215.4	5215.41	4	63.52			IPI00290429	E3 ubiquitin-protein ligase Hakai	APPAELSMAPPPPR		50.33	1	715.876	1429.74	1429.74	2	39.18
IPI00217918	ELMO domain-containing protein 2	KRPYDSDNLQHEELLMK		34.76	1	706.021	2115.04	2115.04	3	39.22			IPI00290429	E3 ubiquitin-protein ligase Hakai	ASLENVHPPIAPPPTEIPER		98.02	1	1082.58	2163.13	2163.14	2	43.79
IPI00217918	ELMO domain-containing protein 2	THRIENSLTYSK		67.78	1	724.878	1447.74	1447.74	2	29.73			IPI00290429	E3 ubiquitin-protein ligase Hakai	DLQAHINHR		37.21	1	552.289	1102.56	1102.56	2	26.9
IPI00007940	ER lipid raft associated 1	ISEIEDAAFLAR		24.29	1	667.853	1333.69	1333.69	2	47.49			IPI00290429	E3 ubiquitin-protein ligase Hakai	HSNLITVPIQDDSNSGAR		85.76	1	962.485	1922.94	1922.96	2	40.43
IPI00007940	ER lipid raft associated 1	IYFGSNIPNMFVDSSCALK	Carbamidomethyl (C)-C16	59.95	1	1082.02	2162.02	2162.02	2	58.3			IPI00026993	E3 ubiquitin-protein ligase RING2	TSDDSGLELDNNNAAMAIDPVMDGASEIELVFRPHPTLMEK	Oxidation (M)-M39	43.2	1	1115.53	4458.07	4458.07	4	64.07
IPI00007940	ER lipid raft associated 1	VMEKETEKR		49.63	1	383.87	1148.59	1148.59	3	15.34			IPI00026993	E3 ubiquitin-protein ligase RING2	TSDDSGLELDNNNAAMAIDPVMDGASEIELVFRPHPTLMEKDDSAQTR		29.13	1	1304.86	5215.4	5215.41	4	63.49
IPI00007940	ER lipid raft associated 1	VVEKEAETER		54.82	1	397.207	1188.6	1188.6	3	19.03			IPI00032003	Emerin	DSAYQSITHYRPVSASR		63.17	1	646.654	1936.94	1936.94	3	38.83
IPI00007676	Estradiol 17-beta-dehydrogenase 12	FKVETR		29.48	1	390.225	778.434	778.435	2	26.47			IPI00032003	Emerin	GYNDDYYEESYFTTR		67.17	1	961.891	1921.76	1921.77	2	45.29
IPI00007676	Estradiol 17-beta-dehydrogenase 12	GVFVQSVLPYFVATK		45.86	1	827.965	1653.91	1653.91	2	59.22			IPI00032003	Emerin	TYGEPESAGPSR		65.01	1	625.785	1249.56	1249.56	2	26.43
IPI00007676	Estradiol 17-beta-dehydrogenase 12	ISYSLFTALR		90.4	1	585.83	1169.64	1169.64	2	55.53			IPI00009896	Epoxide hydrolase 1	EDDSIRPFKVETSDEEIHDLHQR		47.54	1	699.587	2794.32	2794.32	4	40.13
IPI00007676	Estradiol 17-beta-dehydrogenase 12	SKDKLDQVSSEIKEK		108.63	1	867.47	1732.92	1732.92	2	33.12			IPI00009896	Epoxide hydrolase 1	GGHFAAFEEPELLAQDIR		93.57	1	1000.5	1998.98	1998.98	2	54.32
IPI00016910	Eukaryotic translation initiation factor 3 subunit C	LGSLVENNER		58.71	1	565.793	1129.57	1129.57	2	32.09			IPI00009896	Epoxide hydrolase 1	GGHFAAFEEPELLAQDIRK		61.38	1	710.037	2127.07	2127.09	3	51.41
IPI00016910	Eukaryotic translation initiation factor 3 subunit C	LNEILQAR		38.79	1	478.78	955.545	955.546	2	36.56			IPI00007940	ER lipid raft associated 1	ISEIEDAAFLAR		59.09	1	667.852	1333.69	1333.69	2	47.73
IPI00298961	Exportin-1	IYLDMLNVYK		49.11	1	636.339	1270.66	1270.66	2	54.52			IPI00007940	ER lipid raft associated 1	VMEKETEKR		42.54	1	383.87	1148.59	1148.59	3	15.66
IPI00298961	Exportin-1	LISGWVSR		28.72	1	459.264	916.513	916.513	2	41.29			IPI00007940	ER lipid raft associated 1	VVEKEAETER		48.66	1	397.206	1188.6	1188.6	3	18.81
IPI00298961	Exportin-1	LLSEEVFDFSSGQITQVK		91.47	1	1014.02	2026.03	2026.03	2	54.77			IPI00007676	Estradiol 17-beta-dehydrogenase 12	FKVETR		43.49	1	390.225	778.434	778.436	2	26.68
IPI00298961	Exportin-1	NVDILKDPETVK		17.65	1	685.879	1369.75	1369.74	2	39.44			IPI00007676	Estradiol 17-beta-dehydrogenase 12	GVFVQSVLPYFVATK		47.57	1	827.966	1653.91	1653.92	2	59.07
IPI00026970	FACT complex subunit SPT16	ASNIKAPGEQTVPALNLQNAFR		45.41	1	780.421	2338.24	2338.24	3	50.2			IPI00007676	Estradiol 17-beta-dehydrogenase 12	ISYSLFTALR		74.5	1	585.829	1169.64	1169.64	2	55.58
IPI00026970	FACT complex subunit SPT16	ESRYEEEEEQSR		53.87	1	785.837	1569.65	1569.66	2	24.18			IPI00007676	Estradiol 17-beta-dehydrogenase 12	SKDKLDQVSSEIKEK		85.46	1	867.469	1732.92	1732.92	2	33.27
IPI00026970	FACT complex subunit SPT16	LTEQKGEQQIQK		59.84	1	715.385	1428.76	1428.76	2	24.01			IPI00298961	Exportin-1	ETLVYLTHLDYVDTER		25.06	1	656.331	1965.97	1965.97	3	50.97
IPI00026970	FACT complex subunit SPT16	NEGNIFPNPEATFVK		56.17	1	838.921	1675.82	1675.83	2	49.95			IPI00298961	Exportin-1	LLSEEVFDFSSGQITQVK		48.4	1	1014.02	2026.03	2026.03	2	54.65
IPI00026970	FACT complex subunit SPT16	NVGIFLKNEDEEEEEEEKDEAEDLLGR		90.79	1	1060.16	3177.45	3177.45	3	50.68			IPI00298961	Exportin-1	NVDILKDPETVK		56.23	1	685.878	1369.75	1369.74	2	39.57
IPI00026970	FACT complex subunit SPT16	RLTEQKGEQQIQK		85.59	1	529.292	1584.86	1584.86	3	23.94			IPI00298961	Exportin-1	YYGLQILENVIK		49.26	1	726.909	1451.8	1451.8	2	62.27
IPI00026970	FACT complex subunit SPT16	TRNEMTAEEK		67.83	1	604.783	1207.55	1207.55	2	20.61			IPI00026970	FACT complex subunit SPT16	APGEQTVPALNLQNAFR		25.63	1	913.483	1824.95	1824.95	2	51.99
IPI00026970	FACT complex subunit SPT16	VMEIVDADEKVR		63.25	1	702.369	1402.71	1402.72	2	37.9			IPI00026970	FACT complex subunit SPT16	ASNIKAPGEQTVPALNLQNAFR		31.77	1	780.422	2338.24	2338.25	3	50.37
IPI00026970	FACT complex subunit SPT16	YTEGVQSLNWTK		18.74	1	713.358	1424.69	1424.7	2	42.95			IPI00026970	FACT complex subunit SPT16	EKNESNKSSFDK		19.8	1	471.56	1411.66	1411.66	3	16.7
IPI00026781	Fatty acid synthase	FPQLDSTSFANSR		46.57	1	735.355	1468.69	1468.7	2	44.56			IPI00026970	FACT complex subunit SPT16	ESRYEEEEEQSR		58.81	1	785.837	1569.65	1569.66	2	24.39
IPI00026781	Fatty acid synthase	VVVQVLAEEPEAVLK		28.73	1	811.972	1621.93	1621.93	2	50.98			IPI00026970	FACT complex subunit SPT16	HTDVQFYTEVGEITTDLGK		25.34	1	718.353	2152.03	2152.04	3	55.03
IPI00026256	Filaggrin	HTQTSSGGQAASSHEQAR		70.38	1	613.949	1838.83	1838.83	3	12.18			IPI00026970	FACT complex subunit SPT16	LAESVEK		21.62	1	388.214	774.412	774.413	2	23.94
IPI00026256	Filaggrin	KGYSPTHREEEYGKNHHNSSKK	Deamidation (NQ)-N15	40.96	1	523.656	2613.23	2613.25	5	16.64			IPI00026970	FACT complex subunit SPT16	LKDLYIRPNIAQK		27.09	1	524.646	1570.92	1570.92	3	38.64
IPI00397801	Filaggrin-2	HGSSQVWK		38.72	1	464.735	927.456	927.455	2	26.02			IPI00026970	FACT complex subunit SPT16	LTEQKGEQQIQK		76.97	1	715.386	1428.76	1428.76	2	24.13
IPI00397801	Filaggrin-2	HGTIHGQTGDTTR		56.9	1	460.892	1379.65	1379.65	3	15.51			IPI00026970	FACT complex subunit SPT16	NEGNIFPNPEATFVK		29.36	1	838.924	1675.82	1675.83	2	50.18
IPI00397801	Filaggrin-2	LGRQGNLSSSGNQEGSQKR	Deamidation (NQ)-Q4	38.99	1	668.667	2002.98	2002.98	3	25.24			IPI00026970	FACT complex subunit SPT16	RLTEQKGEQQIQK		99.03	1	529.293	1584.86	1584.86	3	24.03
IPI00397801	Filaggrin-2	QGNLSSSGNQEGSQKR		51.8	1	559.603	1675.79	1675.79	3	16.8			IPI00026970	FACT complex subunit SPT16	TRNEMTAEEK		60.73	1	604.783	1207.55	1207.55	2	21.04
IPI00397801	Filaggrin-2	QSSYGQHGSGSSQSSGYGQYGSR		46.6	1	784.669	2350.98	2350.98	3	27.2			IPI00026970	FACT complex subunit SPT16	YTEGVQSLNWTK		21.91	1	713.357	1424.69	1424.7	2	43.04
IPI00397801	Filaggrin-2	SGQSSYGQHSSGSSQSSGYGQHGSR	Deamidation (NQ)-Q8	64.58	1	626.014	2500.02	2500.03	4	22.53			IPI00005154	FACT complex subunit SSRP1	FDEISFVNFAR		36.98	1	672.834	1343.65	1343.65	2	54.86
IPI00397801	Filaggrin-2	SGQSSYGQHSSGSSQSSGYGQHGSR		80.63	1	834.024	2499.04	2499.05	3	21.41			IPI00005154	FACT complex subunit SSRP1	FYVPPTQEDGVDPVEAFAQNVLSK		23.11	1	884.108	2649.3	2649.3	3	62.58
IPI00397801	Filaggrin-2	SSGFGQHESR		39.33	1	546.248	1090.48	1090.48	2	20.31			IPI00026256	Filaggrin	HSGIGHGQASSAVR		82.98	1	455.232	1362.68	1362.67	3	21.86
IPI00030319	Forkhead box protein F2	GHYWTIDPASEFMFEEGSFR		80.74	1	1203.53	2405.04	2405.05	2	59.04			IPI00026256	Filaggrin	HSQVGQGESAGSK		66.89	1	636.303	1270.59	1270.59	2	14.77
IPI00030319	Forkhead box protein F2	YQHHSTPVCDRK	Carbamidomethyl (C)-C9	24.01	1	764.361	1526.7	1526.71	2	16.29			IPI00026256	Filaggrin	HTQNSSSGQAASSHEQAR		80.84	1	628.284	1881.83	1881.83	3	12.12
IPI00024386	Forkhead box protein G1	ADGLGGKGEPGGGPGELAPVGPDEKEKGAGAGGEEK		86.18	1	1092.2	3273.57	3273.58	3	35.21			IPI00026256	Filaggrin	KRPSSLER		27.95	1	486.783	971.551	971.55	2	16.67
IPI00024386	Forkhead box protein G1	GEPGGGPGELAPVGPDEKEKGAGAGGEEK		86.83	1	892.765	2675.27	2675.27	3	33.44			IPI00397801	Filaggrin-2	ASHFQSHSSER		46.9	1	636.789	1271.56	1271.56	2	15.56
IPI00024386	Forkhead box protein G1	GNYWMLDPSSDDVFIGGTTGK		70.67	1	1130.52	2259.02	2259.02	2	56.32			IPI00397801	Filaggrin-2	ENGQPQNCGGQWR	Carbamidomethyl (C)-C8	48.97	1	765.83	1529.64	1529.65	2	28.55
IPI00024386	Forkhead box protein G1	HYDDPGKGNYWMLDPSSDDVFIGGTTGK		77.16	1	1024.8	3071.36	3071.38	3	52.64			IPI00397801	Filaggrin-2	FSNSSSSNEFSK		68.52	1	660.789	1319.56	1319.56	2	28.86
IPI00024386	Forkhead box protein G1	HYDDPGKGNYWMLDPSSDDVFIGGTTGK	Oxidation (M)-M12	35.7	1	1030.13	3087.36	3087.36	3	49.81			IPI00397801	Filaggrin-2	HGSSQVWK		23.85	1	464.735	927.456	927.456	2	26.5
IPI00024386	Forkhead box protein G1	LTLNGIYEFIMK	Deamidation (NQ)-N4	21.7	1	721.885	1441.75	1441.75	2	59.93			IPI00397801	Filaggrin-2	QGNLSSSGNQEGSQKR		55.48	1	559.603	1675.79	1675.79	3	17.02
IPI00024386	Forkhead box protein G1	LTSTGLTFMDR		71.82	1	621.314	1240.61	1240.61	2	45.92			IPI00397801	Filaggrin-2	QSSYGQHGSGSSQSSGYGQYGSR		55.03	1	784.668	2350.98	2350.98	3	27.3
IPI00024386	Forkhead box protein G1	LTSTGLTFMDR	Oxidation (M)-M9	55.96	1	629.311	1256.61	1256.61	2	39.78			IPI00397801	Filaggrin-2	SGQSSYGQHSSGSSQSSGYGQHGSR		86.99	1	625.768	2499.04	2499.04	4	21.77
IPI00457284	G patch domain containing 8	ALGGDVSDQSLESHSQK		105.22	1	879.42	1756.82	1756.83	2	32.65			IPI00397801	Filaggrin-2	SSGFGQHESR		56.35	1	546.247	1090.48	1090.48	2	20.67
IPI00457284	G patch domain containing 8	ASEQMDGDNTTHPK		70.42	1	765.83	1529.64	1529.64	2	20.97			IPI00397801	Filaggrin-2	SSQSNYGQHGSGSSQSSGYGQHGSSSGQTTGFGQHR		26.55	1	723.713	3613.52	3613.53	5	27.81
IPI00457284	G patch domain containing 8	ASEQMDGDNTTHPK	Oxidation (M)-M5	52.54	1	516.219	1545.64	1545.63	3	14.75			IPI00024386	Forkhead box protein G1	ADGLGGKGEPGGGPGELAPVGPDEK		72.88	1	754.373	2260.1	2260.1	3	38.09
IPI00457284	G patch domain containing 8	ATGPPSQNSNIGTGR		94.79	1	728.862	1455.71	1455.71	2	26			IPI00024386	Forkhead box protein G1	ADGLGGKGEPGGGPGELAPVGPDEKEKGAGAGGEEK		55.65	1	655.722	3273.57	3273.58	5	35.41
IPI00457284	G patch domain containing 8	DDGRGDDSKATGPPSQNSNIGTGR		72.08	1	801.37	2401.09	2401.09	3	26.02			IPI00024386	Forkhead box protein G1	GAGAGGEEKKGAGEGGKDGEGGKEGEKK		58.52	1	515.653	2573.23	2573.23	5	11.95
IPI00457284	G patch domain containing 8	DDGRGDDSKATGPPSQNSNIGTGR	Deamidation (NQ)-N17	76.22	1	801.704	2402.07	2402.09	3	26.06			IPI00024386	Forkhead box protein G1	GEPGGGPGELAPVGPDEKEKGAGAGGEEK		47.21	1	892.764	2675.27	2675.27	3	33.69
IPI00457284	G patch domain containing 8	DESTALQWPSELLIFTK		63.52	1	989.515	1977.01	1977.02	2	64.68			IPI00024386	Forkhead box protein G1	GNYWMLDPSSDDVFIGGTTGK		72.17	1	1130.52	2259.02	2259.02	2	56.57
IPI00457284	G patch domain containing 8	DHAEEGTSEDGTKPDEK		85.3	1	922.895	1843.77	1843.78	2	16.44			IPI00024386	Forkhead box protein G1	HYDDPGKGNYWMLDPSSDDVFIGGTTGK		49.51	1	1024.8	3071.36	3071.36	3	53.08
IPI00457284	G patch domain containing 8	ETSMTEPSEPGSKAEAK		51.37	1	889.911	1777.8	1777.81	2	27.28			IPI00024386	Forkhead box protein G1	LTLNGIYEFIMK		44.15	1	721.392	1440.77	1440.77	2	65.02
IPI00457284	G patch domain containing 8	FNEDRDFQGNHFDQYEEGHLEIEQASLDKPIESDNIGHR		55.23	1	772.355	4628.09	4628.09	6	45.43			IPI00024386	Forkhead box protein G1	LTLNGIYEFIMK	Deamidation (NQ)-N4	17.67	1	721.885	1441.75	1441.76	2	60.2
IPI00457284	G patch domain containing 8	GSEGDCSPEDKNSVTAK	Carbamidomethyl (C)-C6	40.79	1	594.261	1779.76	1779.76	3	23.35			IPI00024386	Forkhead box protein G1	LTSTGLTFMDR		76.61	1	621.313	1240.61	1240.61	2	45.99
IPI00457284	G patch domain containing 8	HQEFDNHINSYDHAHK		78.55	1	498.724	1990.87	1990.87	4	28.99			IPI00024386	Forkhead box protein G1	LTSTGLTFMDR	Oxidation (M)-M9	74.6	1	629.311	1256.61	1256.61	2	40.03
IPI00457284	G patch domain containing 8	KALGGDVSDQSLESHSQK		116.77	1	943.47	1884.92	1884.92	2	30.54			IPI00457284	G patch domain containing 8	ALGGDVSDQSLESHSQK		114.73	1	879.42	1756.82	1756.83	2	32.94
IPI00457284	G patch domain containing 8	KPSVSEEVQATPNK		86.13	1	757.398	1512.78	1512.78	2	28.07			IPI00457284	G patch domain containing 8	ASEQMDGDNTTHPK		75.83	1	765.83	1529.64	1529.64	2	21.14
IPI00457284	G patch domain containing 8	KPSVSEEVQATPNKAGPK		108.37	1	934.002	1865.98	1865.99	2	28.56			IPI00457284	G patch domain containing 8	ASEQMDGDNTTHPK	Oxidation (M)-M5	55.8	1	516.219	1545.64	1545.63	3	14.91
IPI00457284	G patch domain containing 8	LHELAEQR		40.49	1	498.265	994.52	994.516	2	25.83			IPI00457284	G patch domain containing 8	ATGPPSQNSNIGTGR		110.06	1	728.861	1455.71	1455.71	2	26.24
IPI00457284	G patch domain containing 8	LHELAEQRK		49.43	1	375.213	1122.61	1122.62	3	22.86			IPI00457284	G patch domain containing 8	DDGRGDDSKATGPPSQNSNIGTGR		91.51	1	801.371	2401.09	2401.09	3	26.28
IPI00457284	G patch domain containing 8	LKDPPQGYFGPK		24.54	1	673.86	1345.7	1345.71	2	36.07			IPI00457284	G patch domain containing 8	DESTALQWPSELLIFTK		69.87	1	989.515	1977.01	1977.01	2	64.56
IPI00457284	G patch domain containing 8	LQQAAQQHIQQQLLAK		101.01	1	923.52	1845.02	1845.03	2	37.78			IPI00457284	G patch domain containing 8	DESTALQWPSELLIFTK	Deamidation (NQ)-Q7	19.46	1	660.345	1977.99	1978.01	3	64.67
IPI00457284	G patch domain containing 8	MDAPASGSACSGLNKQEPGGSHGSETEDTGR	Carbamidomethyl (C)-C10|Deamidation (NQ)-N14	55.32	1	773.584	3090.29	3090.31	4	29.64			IPI00457284	G patch domain containing 8	DHAEEGTSEDGTKPDEK		57.89	1	615.597	1843.77	1843.77	3	16.55
IPI00457284	G patch domain containing 8	RLHELAEQRK		33.22	1	427.246	1278.72	1278.71	3	22.25			IPI00457284	G patch domain containing 8	DIGSSSKDHLQGLDPGEPNKSK		63.12	1	578.037	2308.13	2308.12	4	34.34
IPI00457284	G patch domain containing 8	RSLPAEEGSSGK		49.38	1	609.31	1216.6	1216.61	2	22.49			IPI00457284	G patch domain containing 8	ETSLATPAGK		25.11	1	487.762	973.508	973.509	2	26.67
IPI00457284	G patch domain containing 8	RSLPAEEGSSGKKDEGGGGSSSQDHGGRK	Deamidation (NQ)-Q23	57.09	1	572.474	2857.32	2857.33	5	19.11			IPI00457284	G patch domain containing 8	FNEDRDFQGNHFDQYEEGHLEIEQASLDKPIESDNIGHR		103.63	1	1158.03	4628.09	4628.09	4	45.26
IPI00457284	G patch domain containing 8	SGRGEGPGKKDDGRGDDSKATGPPSQNSNIGTGR		78.69	1	671.926	3354.59	3354.59	5	24.1			IPI00457284	G patch domain containing 8	HQEFDNHINSYDHAHK		46.21	1	664.629	1990.87	1990.87	3	29.23
IPI00457284	G patch domain containing 8	SLPAEEGSSGKK		22.46	1	397.207	1188.6	1188.6	3	21.3			IPI00457284	G patch domain containing 8	HQEFDNHINSYDHAHK	Deamidation (NQ)-Q2	31.15	1	664.964	1991.85	1991.87	3	29.05
IPI00457284	G patch domain containing 8	SLPAEEGSSGKKDEGGGGSSSQDHGGR		97.47	1	858.389	2572.14	2572.15	3	21.55			IPI00457284	G patch domain containing 8	HQEFDNHINSYDHAHKQR		56.32	1	569.764	2275.03	2275.03	4	27.78
IPI00457284	G patch domain containing 8	SLPAEEGSSGKKDEGGGGSSSQDHGGRK		64.25	1	901.089	2700.23	2700.25	3	19.41			IPI00457284	G patch domain containing 8	KALGGDVSDQSLESHSQK		82.27	1	629.313	1884.92	1884.92	3	30.74
IPI00457284	G patch domain containing 8	SLPAEEGSSGKKDEGGGGSSSQDHGGRK	Deamidation (NQ)-Q22	27.87	1	676.317	2701.22	2701.24	4	19.37			IPI00457284	G patch domain containing 8	KAPVKLESIASVFKDHAEEGTSEDGTKPDEK		28.08	1	836.425	3341.66	3341.67	4	44.17
IPI00457284	G patch domain containing 8	STTAHSWQR		31.97	1	537.258	1072.51	1072.5	2	24.11			IPI00457284	G patch domain containing 8	KDDGRGDDSKATGPPSQNSNIGTGR		63.38	1	633.302	2529.18	2529.18	4	24.99
IPI00457284	G patch domain containing 8	TKGTEKPKDIGSSSKDHLQGLDPGEPNK		78.83	1	741.632	2962.5	2962.5	4	31.82			IPI00457284	G patch domain containing 8	KDDGRGDDSKATGPPSQNSNIGTGR	Deamidation (NQ)-Q17	48.46	1	633.553	2530.16	2530.18	4	25.08
IPI00457284	G patch domain containing 8	TKGTEKPKDIGSSSKDHLQGLDPGEPNKSK		42.4	1	795.414	3177.63	3177.63	4	30.79			IPI00457284	G patch domain containing 8	KPSVSEEVQATPNK		97.71	1	757.398	1512.78	1512.78	2	28.09
IPI00457284	G patch domain containing 8	TKGTEKPKDIGSSSKDHLQGLDPGEPNKSK	Deamidation (NQ)-Q19	17.04	1	530.778	3178.61	3178.62	6	30.8			IPI00457284	G patch domain containing 8	LHELAEQRK		39.39	1	562.314	1122.61	1122.61	2	22.85
IPI00457284	G patch domain containing 8	TVSEVSEQPKETSMTEPSEPGSK		83.38	1	822.053	2463.13	2463.14	3	32.06			IPI00457284	G patch domain containing 8	LKDPPQGYFGPK		19.22	1	673.859	1345.7	1345.7	2	36.38
IPI00457284	G patch domain containing 8	TVSEVSEQPKETSMTEPSEPGSKAEAK		77.78	1	955.126	2862.34	2862.36	3	31.28			IPI00457284	G patch domain containing 8	LQQAAQQHIQQQLLAK		122.57	1	923.52	1845.02	1845.03	2	37.82
IPI00457284	G patch domain containing 8	VGDSDGSSNLDGKKEDEDPQDGGSLASTLSK		77.64	1	777.861	3107.4	3107.41	4	37.11			IPI00457284	G patch domain containing 8	QEPGGSHGSETEDTGR		18.22	1	548.568	1642.68	1642.68	3	17
IPI00457284	G patch domain containing 8	VLEVEKEDTEELR		79.46	1	794.91	1587.8	1587.81	2	36.67			IPI00457284	G patch domain containing 8	RLHELAEQR		39.48	1	576.317	1150.62	1150.62	2	25.51
IPI00457284	G patch domain containing 8	VLEVEKEDTEELRQK		92.2	1	922.985	1843.95	1843.96	2	34.5			IPI00457284	G patch domain containing 8	RLHELAEQRK		39.82	1	427.247	1278.72	1278.72	3	22.5
IPI00457284	G patch domain containing 8	VSETQMCESNSSK	Carbamidomethyl (C)-C7	40.76	1	743.812	1485.61	1485.61	2	24.66			IPI00457284	G patch domain containing 8	SLPAEEGSSGKKDEGGGGSSSQDHGGR	Deamidation (NQ)-Q22	34.52	1	515.635	2573.12	2573.14	5	21.74
IPI00457284	G patch domain containing 8	VSETQMCESNSSKETSLATPAGK	Carbamidomethyl (C)-C7	52.36	1	814.709	2441.1	2441.11	3	32.45			IPI00457284	G patch domain containing 8	TKGTEKPKDIGSSSKDHLQGLDPGEPNK		61.89	1	593.506	2962.5	2962.49	5	32
IPI00221394	H/ACA ribonucleoprotein complex subunit 4	AGLESGAEPGDGDSDTTK		47.43	1	853.871	1705.73	1705.73	2	27.93			IPI00457284	G patch domain containing 8	TKGTEKPKDIGSSSKDHLQGLDPGEPNKSK		46.77	1	795.414	3177.63	3177.63	4	30.88
IPI00221394	H/ACA ribonucleoprotein complex subunit 4	APQVVAEAAK		28.57	1	492.279	982.545	982.544	2	28.47			IPI00457284	G patch domain containing 8	TVSEVSEQPKETSMTEPSEPGSK		85.15	1	822.053	2463.13	2463.14	3	32.25
IPI00221394	H/ACA ribonucleoprotein complex subunit 4	LDTSQWPLLLK		64.36	1	657.377	1312.74	1312.74	2	56.51			IPI00457284	G patch domain containing 8	TVSEVSEQPKETSMTEPSEPGSKAEAK		74.96	1	716.593	2862.34	2862.34	4	31.59
IPI00024279	HEAT repeat-containing protein 1	CLEWLIHR	Carbamidomethyl (C)-C1	27.43	1	563.795	1125.58	1125.58	2	62.27			IPI00457284	G patch domain containing 8	VGDSDGSSNLDGKKEDEDPQDGGSLASTLSK		105.38	1	777.859	3107.4	3107.41	4	37.51
IPI00024279	HEAT repeat-containing protein 1	DEVASLLFDPK		47.61	1	617.322	1232.63	1232.63	2	52.18			IPI00457284	G patch domain containing 8	VLEVEKEDTEELR		79.37	1	794.909	1587.8	1587.8	2	36.79
IPI00024279	HEAT repeat-containing protein 1	EGEEEQAINR		62.07	1	587.771	1173.53	1173.53	2	25.54			IPI00457284	G patch domain containing 8	VLEVEKEDTEELRQK		92.32	1	461.996	1843.95	1843.95	4	34.47
IPI00024279	HEAT repeat-containing protein 1	FAALITVLALAEK		38.86	1	680.417	1358.82	1358.82	2	64.96			IPI00457284	G patch domain containing 8	YKDYVDKEK		18.6	1	594.301	1186.59	1186.59	2	24.11
IPI00024279	HEAT repeat-containing protein 1	GLVGNPLPSVR		54.65	1	554.827	1107.64	1107.64	2	43.09			IPI00219018	Glyceraldehyde-3-phosphate dehydrogenase	AGAHLQGGAKR		53.85	1	355.869	1064.58	1064.59	3	15.36
IPI00024279	HEAT repeat-containing protein 1	IELEPPDKAKPLGTVQQK		33.27	1	664.377	1990.11	1990.11	3	37.86			IPI00219018	Glyceraldehyde-3-phosphate dehydrogenase	LISWYDNEFGYSNR		90.1	1	882.406	1762.8	1762.8	2	51.77
IPI00024279	HEAT repeat-containing protein 1	KKEGEEEQAINR		100.72	1	715.868	1429.72	1429.72	2	21.45			IPI00014052	Heart- and neural crest derivatives-expressed protein 1	DAQSGDPEAFKAELK		56.77	1	803.391	1604.77	1604.77	2	37.91
IPI00024279	HEAT repeat-containing protein 1	KKKEGEEEQAINR		66.37	1	520.277	1557.81	1557.81	3	20.46			IPI00014052	Heart- and neural crest derivatives-expressed protein 1	LEALGGR		31.88	1	358.208	714.402	714.402	2	29.82
IPI00024279	HEAT repeat-containing protein 1	LALPQSDASLLSR		79.61	1	685.886	1369.76	1369.76	2	45.88			IPI00014052	Heart- and neural crest derivatives-expressed protein 1	TESINSAFAELR		26.52	1	669.346	1336.66	1336.68	2	48.61
IPI00024279	HEAT repeat-containing protein 1	LGGEEKFQER		56.97	1	596.801	1191.59	1191.59	2	28.71			IPI00024279	HEAT repeat-containing protein 1	AEALMMPLVDQLENR	Oxidation (M)-M6	43.94	1	873.432	1744.85	1744.85	2	53.33
IPI00024279	HEAT repeat-containing protein 1	MIELLADNINLGDPSSMLK		125.94	1	1037.53	2073.05	2073.05	2	59.23			IPI00024279	HEAT repeat-containing protein 1	DEVASLLFDPK		58.39	1	617.322	1232.63	1232.63	2	52.24
IPI00024279	HEAT repeat-containing protein 1	MVIPALIQSDSGDSIEVSR		86.62	1	1009.02	2016.02	2016.03	2	51.52			IPI00024279	HEAT repeat-containing protein 1	EGEEEQAINR		66.94	1	587.771	1173.53	1173.53	2	25.58
IPI00024279	HEAT repeat-containing protein 1	NFGAENPDPFVPVLNTAVK		49.38	1	1015.03	2028.03	2028.04	2	54			IPI00024279	HEAT repeat-containing protein 1	FAALITVLALAEK		108.77	1	680.417	1358.82	1358.82	2	64.98
IPI00024279	HEAT repeat-containing protein 1	SESQEEMLQVFNVETHTSK		26.01	1	741.68	2222.02	2222.02	3	49.74			IPI00024279	HEAT repeat-containing protein 1	GISVNAEQVR		49.52	1	536.791	1071.57	1071.57	2	32.75
IPI00024279	HEAT repeat-containing protein 1	SLDIFIK		21.45	1	418.25	834.485	834.485	2	49.55			IPI00024279	HEAT repeat-containing protein 1	GLVGNPLPSVR		37.73	1	554.827	1107.64	1107.64	2	43.06
IPI00024279	HEAT repeat-containing protein 1	SQDLESVQEVGGSYWQR		97.16	1	984.464	1966.9	1966.91	2	44.81			IPI00024279	HEAT repeat-containing protein 1	IELEPPDK		30.67	1	470.753	939.491	939.491	2	35.97
IPI00304925	Heat shock 70 kDa protein 1	AFYPEEISSMVLTK		41.31	1	807.909	1613.8	1613.8	2	55.45			IPI00024279	HEAT repeat-containing protein 1	IELEPPDKAKPLGTVQQK		26.45	1	664.377	1990.11	1990.11	3	38.17
IPI00304925	Heat shock 70 kDa protein 1	ITITNDKGR		34.04	1	509.287	1016.56	1016.56	2	25.19			IPI00024279	HEAT repeat-containing protein 1	ILAMNHLK		32.12	1	313.854	938.537	938.539	3	35.95
IPI00304925	Heat shock 70 kDa protein 1	MKEIAEAYLGYPVTNAVITVPAYFNDSQR		47.88	1	1087.55	3259.62	3259.63	3	58.17			IPI00024279	HEAT repeat-containing protein 1	ITSEMGSASQANIR	Oxidation (M)-M5	84.62	1	740.858	1479.7	1479.7	2	27.21
IPI00304925	Heat shock 70 kDa protein 1	MKEIAEAYLGYPVTNAVITVPAYFNDSQR	Oxidation (M)-M1	29.22	1	1092.88	3275.62	3275.63	3	57.25			IPI00024279	HEAT repeat-containing protein 1	LALPQSDASLLSR		79.34	1	685.886	1369.76	1369.76	2	46.15
IPI00013881	Heterogeneous nuclear ribonucleoprotein H	ATENDIYNFFSPLNPVR		65.52	1	998.994	1995.97	1995.97	2	60.24			IPI00024279	HEAT repeat-containing protein 1	LALPQSDASLLSRDEVASLLFDPK		42.95	1	862.467	2584.37	2584.38	3	60.11
IPI00013881	Heterogeneous nuclear ribonucleoprotein H	HTGPNSPDTANDGFVR		56.83	1	562.259	1683.76	1683.76	3	32.13			IPI00024279	HEAT repeat-containing protein 1	MIELLADNINLGDPSSMLK		117.62	1	1037.53	2073.05	2073.05	2	59.26
IPI00013881	Heterogeneous nuclear ribonucleoprotein H	STGEAFVQFASQEIAEK		101.45	1	921.451	1840.88	1840.89	2	52.95			IPI00024279	HEAT repeat-containing protein 1	MVIPALIQSDSGDSIEVSR		127.02	1	1009.02	2016.02	2016.03	2	51.52
IPI00027834	Heterogeneous nuclear ribonucleoprotein L	AITHLNNNFMFGQK		60.89	1	817.91	1633.8	1633.81	2	45.18			IPI00024279	HEAT repeat-containing protein 1	NFGAENPDPFVPVLNTAVK		103.59	1	1015.03	2028.03	2028.04	2	53.92
IPI00027834	Heterogeneous nuclear ribonucleoprotein L	FSTPEQAAK		21	1	489.739	977.482	977.464	2	52.38			IPI00024279	HEAT repeat-containing protein 1	TIQQLETVLGEPLQSYF		20.91	1	656.011	1965.01	1965.01	3	65.37
IPI00027834	Heterogeneous nuclear ribonucleoprotein L	IEYAKPTR		16.34	1	489.274	976.534	976.533	2	24.76			IPI00024279	HEAT repeat-containing protein 1	VSLLNEQFLPLIR		56.15	1	771.457	1540.9	1540.9	2	61.18
IPI00027834	Heterogeneous nuclear ribonucleoprotein L	ISRPGDSDDSR		27.17	1	602.782	1203.55	1203.55	2	20.35			IPI00304925	Heat shock 70 kDa protein 1	AFYPEEISSMVLTK		48.36	1	807.91	1613.8	1613.81	2	55.3
IPI00027834	Heterogeneous nuclear ribonucleoprotein L	LNVFKNDQDTWDYTNPNLSGQGDPGSNPNKR		26.52	1	873.662	3490.61	3490.62	4	45.51			IPI00304925	Heat shock 70 kDa protein 1	ATAGDTHLGGEDFDNR		34.29	1	559.248	1674.72	1674.72	3	33.65
IPI00027834	Heterogeneous nuclear ribonucleoprotein L	MAAAGGGGGGGR		44.27	1	459.714	917.414	917.413	2	14.9			IPI00304925	Heat shock 70 kDa protein 1	MKEIAEAYLGYPVTNAVITVPAYFNDSQR		38.08	1	1087.55	3259.62	3259.63	3	58.17
IPI00027834	Heterogeneous nuclear ribonucleoprotein L	NDQDTWDYTNPNLSGQGDPGSNPNKR		125.14	1	964.093	2889.26	2889.26	3	39.23			IPI00304925	Heat shock 70 kDa protein 1	VEIIANDQGNR		35.98	1	614.817	1227.62	1227.62	2	30.97
IPI00027834	Heterogeneous nuclear ribonucleoprotein L	NPNGPYPYTLK		26.48	1	632.322	1262.63	1262.63	2	38.48			IPI00003881	Heterogeneous nuclear ribonucleoprotein F	ATENDIYNFFSPLNPVR		49.97	1	998.993	1995.97	1995.97	2	60.35
IPI00027834	Heterogeneous nuclear ribonucleoprotein L	SDALETLGFLNHYQMK		59.52	1	622.974	1865.9	1865.9	3	54.63			IPI00003881	Heterogeneous nuclear ribonucleoprotein F	ITGEAFVQFASQELAEK		78.09	1	934.476	1866.94	1866.94	2	57.76
IPI00027834	Heterogeneous nuclear ribonucleoprotein L	SKPGAAMVEMADGYAVDR		74.97	1	623.294	1866.86	1866.86	3	43.83			IPI00027834	Heterogeneous nuclear ribonucleoprotein L	AITHLNNNFMFGQK		65.25	1	817.911	1633.8	1633.81	2	45.41
IPI00027834	Heterogeneous nuclear ribonucleoprotein L	TDNAGDQHGGGGGGGGGAGAAGGGGGGENYDDPHKTPASPVVHIR		73.89	1	808.567	4037.8	4037.8	5	33.22			IPI00027834	Heterogeneous nuclear ribonucleoprotein L	ISRPGDSDDSR		26.06	1	602.782	1203.55	1203.55	2	20.33
IPI00217465	Histone H1.2	AKKPAAATVTKK		38.75	1	405.259	1212.76	1212.76	3	12.13			IPI00027834	Heterogeneous nuclear ribonucleoprotein L	LNVFKNDQDTWDYTNPNLSGQGDPGSNPNKR		16.35	1	873.662	3490.61	3490.62	4	45.6
IPI00217465	Histone H1.2	ALAAAGYDVEKNNSR		109.5	1	789.898	1577.78	1577.78	2	31.79			IPI00027834	Heterogeneous nuclear ribonucleoprotein L	NDQDTWDYTNPNLSGQGDPGSNPNKR		124.17	1	964.094	2889.26	2889.26	3	39.6
IPI00217465	Histone H1.2	SGVSLAALKK		80.42	1	487.305	972.597	972.595	2	36.28			IPI00027834	Heterogeneous nuclear ribonucleoprotein L	NPNGPYPYTLK		38.86	1	632.322	1262.63	1262.63	2	38.64
IPI00291764	Histone H2A type 1	AGLQFPVGR		20.16	1	472.769	943.524	943.523	2	43.34			IPI00027834	Heterogeneous nuclear ribonucleoprotein L	SKPGAAMVEMADGYAVDR		102.87	1	934.439	1866.86	1866.86	2	44.1
IPI00291764	Histone H2A type 1	HLQLAIR		48.65	1	425.768	849.518	849.521	2	37.65			IPI00027834	Heterogeneous nuclear ribonucleoprotein L	TDNAGDQHGGGGGGGGGAGAAGGGGGGENYDDPHKTPASPVVHIR		61.71	1	808.567	4037.8	4037.8	5	33.35
IPI00291764	Histone H2A type 1	HLQLAIRNDEELNK		66.72	1	564.972	1691.9	1691.9	3	37.8			IPI00027834	Heterogeneous nuclear ribonucleoprotein L	VFNVFCLYGNVEK	Carbamidomethyl (C)-C6	86.04	1	794.895	1587.78	1587.78	2	58.25
IPI00291764	Histone H2A type 1	HLQLAIRNDEELNKLLGK		29.96	1	526.804	2103.18	2103.19	4	48.15			IPI00217466	Histone H1.3	ALAAAGYDVEKNNSR		106.86	1	789.898	1577.78	1577.78	2	32.01
IPI00291764	Histone H2A type 1	NDEELNKLLGK		55.56	1	636.843	1271.67	1271.67	2	43.35			IPI00217466	Histone H1.3	KALAAAGYDVEKNNSR		48.15	1	569.632	1705.87	1705.87	3	30.1
IPI00291764	Histone H2A type 1	VTIAQGGVLPNIQAVLLPK		80.12	1	966.09	1930.16	1930.17	2	59.76			IPI00217466	Histone H1.3	KASGPPVSELITK		62.65	1	663.885	1325.76	1325.76	2	39.39
IPI00291764	Histone H2A type 1	VTIAQGGVLPNIQAVLLPK	Deamidation (NQ)-Q13	52.02	1	966.582	1931.15	1931.15	2	61.76			IPI00031562	Histone H2A type 3	AGLQFPVGR		41.84	1	472.769	943.524	943.524	2	43.82
IPI00291764	Histone H2A type 1	VTIAQGGVLPNIQAVLLPK	Deamidation (NQ)-N11	40.68	1	966.584	1931.15	1931.15	2	63.27			IPI00031562	Histone H2A type 3	HLQLAIR		45.23	1	425.767	849.518	849.52	2	37.65
IPI00018278	Histone H2A.V	ATIAGGGVIPHIHK		61.02	1	685.899	1369.78	1369.78	2	37.75			IPI00031562	Histone H2A type 3	HLQLAIRNDEELNK		42.37	1	846.957	1691.9	1691.9	2	38.05
IPI00018278	Histone H2A.V	HLQLAIRGDEELDSLIK		57.65	1	650.693	1949.06	1949.06	3	50.43			IPI00031562	Histone H2A type 3	HLQLAIRNDEELNKLLGR		28.38	1	533.804	2131.19	2131.19	4	49.23
IPI00220403	Histone H2B type 1-B	AMGIMNSFVNDIFER		94.42	1	872.415	1742.81	1742.82	2	64.12			IPI00031562	Histone H2A type 3	VTIAQGGVLPNIQAVLLPK		74.12	1	966.091	1930.16	1930.17	2	59.8
IPI00220403	Histone H2B type 1-B	AMGIMNSFVNDIFER	Deamidation (NQ)-N6	87.35	1	872.907	1743.8	1743.8	2	64.87			IPI00031562	Histone H2A type 3	VTIAQGGVLPNIQAVLLPK	Deamidation (NQ)-Q13	49.07	1	966.582	1931.15	1931.15	2	63.02
IPI00220403	Histone H2B type 1-B	AMGIMNSFVNDIFER	Oxidation (M)-M2	121.02	1	880.412	1758.81	1758.81	2	61.16			IPI00218448	Histone H2A.Z	ATIAGGGVIPHIHK		83.4	1	685.9	1369.78	1369.79	2	37.95
IPI00220403	Histone H2B type 1-B	AMGIMNSFVNDIFER	Oxidation (M)-M5	56.73	1	880.412	1758.81	1758.81	2	57.61			IPI00218448	Histone H2A.Z	GDEELDSLIK		58.81	1	559.787	1117.55	1117.56	2	45.08
IPI00220403	Histone H2B type 1-B	KESYSIYVYK		42.33	1	640.332	1278.65	1278.65	2	39.05			IPI00794461	Histone H2B type 1-N	AMGIMNSFVNDIFER		99.38	1	872.416	1742.81	1742.82	2	64.21
IPI00220403	Histone H2B type 1-B	QVHPDTGISSK		22.36	1	584.801	1167.59	1167.59	2	24.29			IPI00794461	Histone H2B type 1-N	AMGIMNSFVNDIFER	Deamidation (NQ)-N6	77.25	1	872.907	1743.8	1743.8	2	64.9
IPI00171611	Histone H3.2	EIAQDFKTDLR		29.58	1	668.349	1334.68	1334.68	2	39.15			IPI00794461	Histone H2B type 1-N	AMGIMNSFVNDIFER	Oxidation (M)-M2	107.39	1	880.413	1758.81	1758.81	2	61.32
IPI00171611	Histone H3.2	KQLATKAAR	Sumo 3 (K)-K6	28.58	1	722.406	1442.8	1442.8	2	18.22			IPI00794461	Histone H2B type 1-N	FTESIK		15.86	1	362.704	723.38	723.394	2	23.57
IPI00171611	Histone H3.2	YRPGTVALR		36.01	1	516.8	1031.59	1031.59	2	31.92			IPI00794461	Histone H2B type 1-N	QVHPDTGISSK		38.95	1	584.801	1167.59	1167.59	2	24.52
IPI00453473	Histone H4	KTVTAMDVVYALKR		29.79	1	532.303	1593.89	1593.89	3	48.46			IPI00453473	Histone H4	TVTAMDVVYALKR		21.35	1	733.907	1465.8	1465.8	2	51.86
IPI00453473	Histone H4	TVTAMDVVYALK		63.73	1	655.855	1309.7	1309.7	2	54.29			IPI00453473	Histone H4	VFLENVIR		30.59	1	495.292	988.571	988.57	2	48.44
IPI00453473	Histone H4	TVTAMDVVYALKR		85.12	1	733.906	1465.8	1465.8	2	51.59			IPI00453473	Histone H4	VFLENVIRDAVTYTEHAK		68.49	1	702.373	2104.1	2104.1	3	61.75
IPI00472151	HLA class I histocompatibility antigen A-23 alpha chain	DGEDQTQDTELVETRPAGDGTFQK		72.38	1	879.736	2636.18	2636.19	3	37.46			IPI00328319	Histone-binding protein RBBP4	RLNVWDLSK		49.79	1	565.819	1129.62	1129.62	2	44.99
IPI00472151	HLA class I histocompatibility antigen A-23 alpha chain	RNSSDR	Deamidation (NQ)-N2	27.89	1	368.181	734.331	734.347	2	14.55			IPI00328319	Histone-binding protein RBBP4	YMPQNPCIIATK	Oxidation (M)-M2|Deamidation (NQ)-N5|Carbamidomethyl (C)-C7|Sumo 3 deamidated (K)-K12	16.98	1	955.943	1909.85	1909.87	2	47.59
IPI00016928	Homeobox protein CDX-2	KPAQQSLGSQVK		72.18	1	635.859	1269.7	1269.7	2	26.03			IPI00472605	HLA class I histocompatibility antigen Cw-2 alpha chain	DGEDQTQDTELVETRPAGDGTFQK		69.52	1	879.736	2636.18	2636.19	3	37.66
IPI00016928	Homeobox protein CDX-2	LELEKEFHYSR		71.08	1	725.87	1449.73	1449.73	2	39.88			IPI00472605	HLA class I histocompatibility antigen Cw-2 alpha chain	GYDQSAYDGKDYIALNEDLR		20.23	1	769.357	2305.05	2305.05	3	45.55
IPI00016928	Homeobox protein CDX-2	VVYTDHQR		36.65	1	509.258	1016.5	1016.5	2	20.34			IPI00018974	Homeobox protein DLX-2	IVNGKPK	Deamidation (NQ)-N3	33.17	1	378.735	755.454	755.456	2	15.62
IPI00018974	Homeobox protein DLX-2	IVNGKPK	Deamidation (NQ)-N3	23.88	1	378.735	755.454	755.454	2	14.82			IPI00018974	Homeobox protein DLX-2	IWFQNRR		27.73	1	340.523	1018.55	1018.55	3	38.7
IPI00018974	Homeobox protein DLX-2	SSYDLGYTAAYTSYAPYGTSSSPANNEPEKEDLEPEIR		98.63	1	1391.63	4171.87	4171.88	3	47.7			IPI00018974	Homeobox protein DLX-2	SGEIPSEQHPGASASPPCASPPVSAPASWDFGVPQR	Carbamidomethyl (C)-C18	57.85	1	1219.91	3656.7	3656.71	3	48.65
IPI00018974	Homeobox protein DLX-2	TIYSSFQLAALQR		94.4	1	749.408	1496.8	1496.8	2	50.65			IPI00018974	Homeobox protein DLX-2	SSYDLGYTAAYTSYAPYGTSSSPANNEPEKEDLEPEIR		99.87	1	1391.63	4171.87	4171.88	3	47.89
IPI00010744	Homeobox protein Hox-A9	EKQPSEGAFSENNAENESGGDKPPIDPNNPAANWLHAR		66.76	1	1022.73	4086.87	4086.89	4	45.53			IPI00018974	Homeobox protein DLX-2	TIYSSFQLAALQR		109.22	1	749.408	1496.8	1496.8	2	51.07
IPI00010744	Homeobox protein Hox-A9	YAPGTLGQPPR		37.54	1	578.809	1155.6	1155.6	2	32.93			IPI00027682	Homeobox protein OTX1	ERTTFTR		27.31	1	455.741	909.467	909.467	2	23.63
IPI00027682	Homeobox protein OTX1	INLPESR		40.04	1	414.732	827.45	827.45	2	32.88			IPI00027682	Homeobox protein OTX1	SQLDVLEALFAK		95.49	1	667.372	1332.73	1332.73	2	62.9
IPI00027682	Homeobox protein OTX1	SQLDVLEALFAK		111.76	1	667.373	1332.73	1332.73	2	63.03			IPI00398625	Hornerin	GEQHGSSSGSSSSYGQHGSGSR		102.3	1	531.474	2121.87	2121.87	4	15.22
IPI00398625	Hornerin	GEQHGSSSGSSSSYGQHGSGSR		96.28	1	531.474	2121.87	2121.87	4	15.06			IPI00398625	Hornerin	GEQHGSSSGSSSSYGQHGSGSR	Deamidation (NQ)-Q16	80.65	1	531.724	2122.85	2122.87	4	15.38
IPI00398625	Hornerin	GPYESGSGHSSGLGHR		106.94	1	792.863	1583.71	1583.71	2	24.38			IPI00398625	Hornerin	GPYESGSGHSSGLGHR		128.91	1	792.863	1583.71	1583.71	2	24.19
IPI00398625	Hornerin	HGAGSGQSLSHGR		105.52	1	625.804	1249.59	1249.59	2	15.73			IPI00398625	Hornerin	GRHGSGSGHSSSYGQHGSGSGWSSSSGR		90.82	1	673.292	2689.14	2689.14	4	24.23
IPI00398625	Hornerin	HGSGLGHSSSHGQHGSGSGR		79.65	1	472.215	1884.83	1884.83	4	11.86			IPI00398625	Hornerin	GSGSGQSPSSGQHGTGFGR		98.32	1	874.391	1746.77	1746.77	2	25.34
IPI00398625	Hornerin	HGSGSGHSSSYGQHGSGSGWSSSSGR		102.07	1	826.346	2476.01	2476.02	3	24.67			IPI00398625	Hornerin	GSGSGQSPSSGQHGTGFGR	Deamidation (NQ)-Q12	37.7	1	583.591	1747.75	1747.75	3	26.58
IPI00398625	Hornerin	HGSGSGQSSGFGHK		34.6	1	443.869	1328.59	1328.59	3	16.02			IPI00398625	Hornerin	GSGSGQSPSYGR		48.64	1	570.259	1138.5	1138.5	2	20.81
IPI00398625	Hornerin	HGSGSGQSSSYGPYGSGSGWSSSR		86.97	1	773.662	2317.96	2317.96	3	35.31			IPI00398625	Hornerin	HGAGSGQSLSHGR		110.64	1	625.803	1249.59	1249.59	2	15.74
IPI00398625	Hornerin	HGSSSGSSSSYGQHGSGSR		92.3	1	603.59	1807.75	1807.75	3	12.32			IPI00398625	Hornerin	HGSGLGHSSSHGQHGSGSGR		70.56	1	629.285	1884.83	1884.83	3	11.91
IPI00398625	Hornerin	QGSSAGSSSSYGQHGSGSR		78.87	1	595.258	1782.75	1782.75	3	16.31			IPI00398625	Hornerin	HGSGSGHSSSHGQHGSGSSYSYSR		71	1	598.252	2388.98	2388.98	4	19.17
IPI00398625	Hornerin	QSLGHGQHGSGSGQSPSPSR		53.96	1	649.972	1946.89	1946.9	3	19.89			IPI00398625	Hornerin	HGSGSGHSSSHGQHGSGSSYSYSR	Deamidation (NQ)-Q13	28.25	1	479.003	2389.97	2389.98	5	19.24
IPI00398625	Hornerin	QSLGHGQHGSGSGQSPSPSR	Deamidation (NQ)-Q7|Deamidation (NQ)-Q14	29.97	1	650.629	1948.86	1948.86	3	21.96			IPI00398625	Hornerin	HGSGSGHSSSYGQHGSGSGWSSSSGR		104.28	1	826.346	2476.01	2476.02	3	24.8
IPI00398625	Hornerin	QSSSYGPHGYGSGR		43.63	1	720.32	1438.62	1438.63	2	26.2			IPI00398625	Hornerin	HGSGSGHSSSYGQHGSGSGWSSSSGR	Deamidation (NQ)-Q13	122.48	1	620.261	2477	2477.01	4	24.75
IPI00398625	Hornerin	QSSSYGQHESASR		60.95	1	475.211	1422.61	1422.61	3	16.64			IPI00398625	Hornerin	HGSGSGQSSGFGHHESSSWQSSGYTQHGSGSGHSSSYEQHGSR		61.6	1	881.568	4402.8	4402.81	5	29.87
IPI00398625	Hornerin	SEQHGSSSGLSSSYGQHGSGSHQSSGHGR		25.93	1	718.062	2868.22	2868.22	4	23.16			IPI00398625	Hornerin	HGSGSGQSSGFGHK		85.04	1	443.869	1328.59	1328.59	3	16.31
IPI00398625	Hornerin	SEQHGSSSGSSSSYGQHGSGSR		93.55	1	538.975	2151.88	2151.87	4	15.05			IPI00398625	Hornerin	HGSGSGQSSSYGPYGSGSGWSSSR		88.58	1	773.662	2317.96	2317.96	3	35.6
IPI00398625	Hornerin	SEQHGSSSGSSSSYGQHGSGSR	Deamidation (NQ)-Q16	81.39	1	539.227	2152.86	2152.88	4	15.13			IPI00398625	Hornerin	HGSSSGSSSHYGQHGSGSR		55.03	1	465.45	1857.77	1857.77	4	11.97
IPI00398625	Hornerin	SGQSSRGEQHGSSSGSSSSYGQHGSGSR		97.51	1	682.044	2724.15	2724.15	4	15.11			IPI00398625	Hornerin	HGSSSGSSSSYGQHGSGSR		130.26	1	904.883	1807.75	1807.75	2	12.46
IPI00398625	Hornerin	SGSGQSSGYSQHGSGSSHSSGYRK		102.06	1	593.761	2371.02	2371.02	4	16.44			IPI00398625	Hornerin	QGSSAGSSSSYGQHGSGSR		97.18	1	595.258	1782.75	1782.75	3	17.08
IPI00398625	Hornerin	SGSGWSSSRGPYESGSGHSSGLGHR		41.75	1	619.78	2475.09	2475.09	4	31.5			IPI00398625	Hornerin	QSLGHGQHGSGSGQSPSPSR		59.28	1	649.973	1946.89	1946.9	3	20.06
IPI00398625	Hornerin	SSSGQSSGYSQHGSGSGHSSGYGQHGSR		42.13	1	678.286	2709.11	2709.11	4	18.17			IPI00398625	Hornerin	QSLGHGQHGSGSGQSPSPSR	Deamidation (NQ)-Q7|Deamidation (NQ)-Q14	28.73	1	650.628	1948.86	1948.86	3	22.09
IPI00398625	Hornerin	SSSGSSSSYGQHGSGSR		107.54	1	807.842	1613.67	1613.67	2	15.17			IPI00398625	Hornerin	QSSSYGPHGYGSGR		46.26	1	720.32	1438.62	1438.63	2	26.4
IPI00398625	Hornerin	SSSRGPYESR		56.63	1	563.267	1124.52	1124.52	2	17.71			IPI00398625	Hornerin	QSSSYGQHESASR		98.67	1	475.211	1422.61	1422.61	3	17.28
IPI00398625	Hornerin	SSSSGQHGSGLGESSGFGHHESSSGQSSSYSQHGSGSGHSSGYGQHGSR		59	1	792.333	4747.95	4747.96	6	27.79			IPI00398625	Hornerin	SEQHGSSSGLSSSYGQHGSGSHQSSGHGR		58.86	1	957.082	2868.22	2868.22	3	23.03
IPI00398625	Hornerin	YGQQGSGSGQSPSR		56.39	1	698.317	1394.62	1394.62	2	17.1			IPI00398625	Hornerin	SEQHGSSSGSSSSYGQHGSGSR		109.33	1	538.977	2151.88	2151.88	4	15.42
IPI00001639	Importin subunit beta-1	AAVENLPTFLVELSR		94.35	1	829.961	1657.9	1657.91	2	63.02			IPI00398625	Hornerin	SGQSSRGEQHGSSSGSSSSYGQHGSGSR		74.42	1	682.044	2724.15	2724.15	4	15.32
IPI00001639	Importin subunit beta-1	LAATNALLNSLEFTK		98.85	1	803.447	1604.88	1604.88	2	56.46			IPI00398625	Hornerin	SGQSSRGEQHGSSSGSSSSYGQHGSGSR	Deamidation (NQ)-Q9	29.78	1	546.037	2725.13	2725.15	5	15.53
IPI00001639	Importin subunit beta-1	SSAYESLMEIVK		85.74	1	678.84	1355.66	1355.67	2	54.87			IPI00398625	Hornerin	SGSGQSSGYSQHGSGSSHSSGYR		70.73	1	561.737	2242.92	2242.92	4	20.89
IPI00001639	Importin subunit beta-1	VLANPGNSQVAR		67.9	1	613.335	1224.66	1224.66	2	28.53			IPI00398625	Hornerin	SGSGQSSGYSQHGSGSSHSSGYRK		108.24	1	593.761	2371.02	2371.02	4	16.69
IPI00185146	Importin-9	HLQEAEQTK		20.27	1	542.274	1082.54	1082.53	2	16.24			IPI00398625	Hornerin	SGSGWSSSRGPYESGSGHSSGLGHR		54.98	1	619.78	2475.09	2475.09	4	31.53
IPI00185146	Importin-9	LIINELSNVMEANAAR		48.55	1	879.465	1756.91	1756.92	2	56.14			IPI00398625	Hornerin	SSSGQSSGYSQHGSGSGHSSGYGQHGSR		35.74	1	678.286	2709.11	2709.12	4	19.37
IPI00032491	Inner nuclear membrane protein Man1	GLKAPPAPLAASEVTNSNSAER		67.62	1	727.382	2179.12	2179.12	3	38.62			IPI00398625	Hornerin	SSSGSSSSYGQHGSGSR		134.75	1	807.841	1613.67	1613.67	2	15.44
IPI00032491	Inner nuclear membrane protein Man1	HMNSMSHLR	Oxidation (M)-M2	21.63	1	376.84	1127.5	1127.5	3	22.5			IPI00398625	Hornerin	SSSRGPYESR		56.05	1	563.269	1124.52	1124.52	2	18.19
IPI00032491	Inner nuclear membrane protein Man1	HMNSMSHLR		51.58	1	556.757	1111.5	1111.5	2	26.43			IPI00398625	Hornerin	SSSSGQHGSGLGESSGFGHHESSSGQSSSYSQHGSGSGHSSGYGQHGSR		40.69	1	792.335	4747.95	4747.96	6	27.52
IPI00032491	Inner nuclear membrane protein Man1	INHANHTGSNHTYLK		81.47	1	427.464	1705.83	1705.83	4	23.46			IPI00398625	Hornerin	YGQQGSGSGQSPSR		60.97	1	698.316	1394.62	1394.62	2	17.59
IPI00032491	Inner nuclear membrane protein Man1	IYSNSLPPSAAVAASSSLR		49.95	1	946.002	1889.98	1889.99	2	43.02			IPI00001639	Importin subunit beta-1	AAVENLPTFLVELSR		58.01	1	829.96	1657.9	1657.91	2	63.12
IPI00032491	Inner nuclear membrane protein Man1	KLREEEQQQHR		44.53	1	494.258	1479.75	1479.75	3	14.96			IPI00001639	Importin subunit beta-1	LAATNALLNSLEFTK		89.49	1	803.447	1604.88	1604.88	2	56.18
IPI00032491	Inner nuclear membrane protein Man1	LAQLAGDHECGSSSQR	Carbamidomethyl (C)-C10	86.56	1	858.393	1714.77	1714.77	2	27.8			IPI00001639	Importin subunit beta-1	VLANPGNSQVAR		79.31	1	613.335	1224.66	1224.66	2	28.71
IPI00032491	Inner nuclear membrane protein Man1	LREEEQQQHR		50.78	1	451.56	1351.66	1351.66	3	15.05			IPI00032491	Inner nuclear membrane protein Man1	APPAPLAASEVTNSNSAER		158.74	1	941.471	1880.92	1880.93	2	36.36
IPI00032491	Inner nuclear membrane protein Man1	LRTGLTNSQGSS		71.99	1	610.816	1219.62	1219.62	2	27.52			IPI00032491	Inner nuclear membrane protein Man1	AVDFLAANESR		50.65	1	596.801	1191.59	1191.59	2	41.97
IPI00032491	Inner nuclear membrane protein Man1	LSEPEEELLQQFK		62.53	1	795.407	1588.8	1588.8	2	52.54			IPI00032491	Inner nuclear membrane protein Man1	DSLIQPHDR		15.15	1	540.774	1079.54	1079.53	2	29.51
IPI00032491	Inner nuclear membrane protein Man1	VLLGFSSDESDVEASPR		116.42	1	904.441	1806.86	1806.87	2	46.03			IPI00032491	Inner nuclear membrane protein Man1	GTGVSEDGELSIENPFGETFGK		71.6	1	1135.53	2269.04	2269.05	2	54.59
IPI00032491	Inner nuclear membrane protein Man1	YGLSPGPVTESTRPVYLK		16.29	1	655.36	1963.04	1963.06	3	43.22			IPI00032491	Inner nuclear membrane protein Man1	HMNSMSHLR	Oxidation (M)-M2	39.15	1	376.84	1127.5	1127.5	3	22.34
IPI00291607	Inositol 1 4 5-trisphosphate receptor type 3	GSGKGEEVEAGAAK		35.68	1	430.55	1288.63	1288.63	3	19.59			IPI00032491	Inner nuclear membrane protein Man1	IGGADFLVWR		94.7	1	567.309	1132.6	1132.6	2	55.06
IPI00291607	Inositol 1 4 5-trisphosphate receptor type 3	LFTTTEQDEQGSK		28.49	1	742.35	1482.68	1482.69	2	31.05			IPI00032491	Inner nuclear membrane protein Man1	INHANHTGSNHTYLK		75.78	1	569.616	1705.83	1705.83	3	23.63
IPI00291607	Inositol 1 4 5-trisphosphate receptor type 3	STVAVNMNDLGSQPHEDREPVDPTTK		69.43	1	946.452	2836.33	2836.33	3	38.52			IPI00032491	Inner nuclear membrane protein Man1	ISASGPESLLGGPGGASAAPAAGSK		112.63	1	1055.54	2109.07	2109.07	2	43.62
IPI00418313	interleukin enhancer binding factor 3 isoform d	EDITQSAQHALR		47.24	1	684.847	1367.68	1367.68	2	35.6			IPI00032491	Inner nuclear membrane protein Man1	IYSNSLPPSAAVAASSSLR		68.88	1	946	1889.98	1889.99	2	43.31
IPI00418313	interleukin enhancer binding factor 3 isoform d	SGGNSYGSGGASYNPGSHGGYGGGSGGGSSYQGK		60.12	1	1004.75	3011.23	3011.23	3	30.58			IPI00032491	Inner nuclear membrane protein Man1	KLREEEQQQHR		44.61	1	494.258	1479.75	1479.75	3	14.84
IPI00297572	Intron-binding protein aquarius	DADVEDEDTEEAK		81.79	1	733.295	1464.57	1464.58	2	25.34			IPI00032491	Inner nuclear membrane protein Man1	LAQLAGDHECGSSSQR	Carbamidomethyl (C)-C10	75.52	1	858.394	1714.77	1714.77	2	27.83
IPI00297572	Intron-binding protein aquarius	TLIVTHSNQALNQLFEK		63.63	1	978.533	1955.05	1955.05	2	49.78			IPI00032491	Inner nuclear membrane protein Man1	LREEEQQQHR		64.37	1	676.837	1351.66	1351.66	2	15.14
IPI00297572	Intron-binding protein aquarius	VGVPTVDLDAQGR		56.58	1	663.855	1325.69	1325.69	2	40.97			IPI00032491	Inner nuclear membrane protein Man1	LRTGLTNSQGSS		52.79	1	610.816	1219.62	1219.62	2	27.81
IPI00797572	IQ motif and Sec7 domain 1 isoform a	RSSAGSLESNVEGSIISSPHMR		74.85	1	767.713	2300.12	2300.12	3	44.28			IPI00032491	Inner nuclear membrane protein Man1	LSEPEEELLQQFK		62.27	1	795.407	1588.8	1588.8	2	52.54
IPI00797572	IQ motif and Sec7 domain 1 isoform a	SSAGSLESNVEGSIISSPHMR		83.12	1	1073.02	2144.02	2144.02	2	45.82			IPI00032491	Inner nuclear membrane protein Man1	VLLGFSSDESDVEASPR		105.4	1	904.441	1806.86	1806.87	2	46.05
IPI00163085	Isoform 1 of Angiomotin	AQGPLPNQHSLK		62.17	1	645.352	1288.69	1288.69	2	30.88			IPI00418313	interleukin enhancer binding factor 3 isoform d	EDITQSAQHALR		60.12	1	684.847	1367.68	1367.68	2	35.88
IPI00163085	Isoform 1 of Angiomotin	AQPSSASYQPVPADPFAIVSR		91.69	1	1094.56	2187.1	2187.1	2	52.09			IPI00418313	interleukin enhancer binding factor 3 isoform d	LAAFGQLHK		44.94	1	328.86	983.555	983.557	3	37.19
IPI00163085	Isoform 1 of Angiomotin	AQQMVEILSDENR		80.87	1	766.873	1531.73	1531.73	2	43.62			IPI00418313	interleukin enhancer binding factor 3 isoform d	NADHSMNYQYR		28.81	1	699.797	1397.58	1397.58	2	29.38
IPI00163085	Isoform 1 of Angiomotin	DQALSNAQAK		30.64	1	523.258	1044.52	1044.5	2	21.37			IPI00418313	interleukin enhancer binding factor 3 isoform d	SGGNSYGSGGASYNPGSHGGYGGGSGGGSSYQGK		83.5	1	1004.75	3011.23	3011.24	3	30.54
IPI00163085	Isoform 1 of Angiomotin	DTTVISHSPNTSYDTALEAR		104.12	1	1089.52	2177.02	2177.03	2	38.41			IPI00418313	interleukin enhancer binding factor 3 isoform d	VLAGETLSVNDPPDVLDR		70.47	1	955.499	1908.98	1908.98	2	46.88
IPI00163085	Isoform 1 of Angiomotin	GQQHASVGAAFYVTGVTNQK		63.11	1	688.349	2062.02	2062.02	3	42.62			IPI00297572	Intron-binding protein aquarius	DADVEDEDTEEAK		63.23	1	733.295	1464.57	1464.58	2	25.32
IPI00163085	Isoform 1 of Angiomotin	ILALEADMTK		35.77	1	552.801	1103.59	1103.59	2	44.93			IPI00297572	Intron-binding protein aquarius	TDVAVQIISNIYHNFPEQR		44.51	1	748.72	2243.13	2243.14	3	62.47
IPI00163085	Isoform 1 of Angiomotin	IQKEEEEILMANK		23.96	1	525.608	1573.8	1573.8	3	38.28			IPI00297572	Intron-binding protein aquarius	VGVPTVDLDAQGR		39.83	1	663.855	1325.69	1325.7	2	41.2
IPI00163085	Isoform 1 of Angiomotin	LLQEQLR		59.28	1	450.269	898.524	898.524	2	34.12			IPI00797572	IQ motif and Sec7 domain 1 isoform a	RSSAGSLESNVEGSIISSPHMR	Deamidation (NQ)-N10	43.73	1	768.048	2301.1	2301.12	3	44.28
IPI00163085	Isoform 1 of Angiomotin	MRTEGRPSVQR		61.14	1	439.567	1315.68	1315.68	3	23.46			IPI00797572	IQ motif and Sec7 domain 1 isoform a	SSAGSLESNVEGSIISSPHMR		57.59	1	715.68	2144.02	2144.02	3	46.08
IPI00163085	Isoform 1 of Angiomotin	NKLEGEIRR		27.95	1	557.82	1113.63	1113.63	2	27.48			IPI00556385	Isoform 1 of ADP-dependent glucokinase	APQEFMTSHSEAGSR		95.49	1	817.866	1633.72	1633.72	2	31.98
IPI00163085	Isoform 1 of Angiomotin	NSEEQPSGGTTVLQR		95.7	1	801.89	1601.76	1601.77	2	30.6			IPI00556385	Isoform 1 of ADP-dependent glucokinase	VAGTQACATETIDTSR	Carbamidomethyl (C)-C7	99.38	1	840.896	1679.78	1679.78	2	30.91
IPI00163085	Isoform 1 of Angiomotin	QLAEKEYEGSEDTR		37.36	1	827.884	1653.75	1653.75	2	27.61			IPI00163085	Isoform 1 of Angiomotin	AHPPVTSAPLSPPQPNDLYKNPTSSSEFYK		21.52	1	818.159	3268.6	3268.61	4	44.45
IPI00163085	Isoform 1 of Angiomotin	QLAEKEYEGSEDTRK		76.28	1	891.931	1781.84	1781.85	2	26.13			IPI00163085	Isoform 1 of Angiomotin	AQGPLPNQHSLK		53.72	1	645.352	1288.69	1288.69	2	31.02
IPI00163085	Isoform 1 of Angiomotin	QVYVDKVEK		57.43	1	369.873	1106.6	1106.6	3	28.02			IPI00163085	Isoform 1 of Angiomotin	AQPSSASYQPVPADPFAIVSR		85.43	1	1094.56	2187.1	2187.1	2	52.38
IPI00163085	Isoform 1 of Angiomotin	SLMSISNAGSGLLSHSSTLTGSPIMEEK		75.69	1	945.47	2833.38	2833.39	3	53.24			IPI00163085	Isoform 1 of Angiomotin	AQQMVEILSDENR		36.06	1	766.877	1531.73	1531.74	2	43.64
IPI00163085	Isoform 1 of Angiomotin	TEGRPSVQR		24.38	1	343.854	1028.54	1028.54	3	19.72			IPI00163085	Isoform 1 of Angiomotin	DTTVISHSPNTSYDTALEAR		63.74	1	1089.52	2177.02	2177.03	2	38.73
IPI00163085	Isoform 1 of Angiomotin	VVKLEEELK		37.25	1	543.824	1085.63	1085.63	2	36.98			IPI00163085	Isoform 1 of Angiomotin	GQQHASVGAAFYVTGVTNQK		15.72	1	688.348	2062.02	2062.02	3	43.09
IPI00878014	Isoform 1 of Ankyrin repeat and BTB/POZ domain-containing protein BTBD11	FFQLEALQR		22.86	1	576.307	1150.61	1150.6	2	50.35			IPI00163085	Isoform 1 of Angiomotin	ILALEADMTK		37.35	1	552.801	1103.59	1103.59	2	45.11
IPI00878014	Isoform 1 of Ankyrin repeat and BTB/POZ domain-containing protein BTBD11	KLTEIK		43.66	1	366.237	730.459	730.46	2	25.83			IPI00163085	Isoform 1 of Angiomotin	LNQPGRTEGQLMR		19.38	1	500.596	1498.77	1498.77	3	32.48
IPI00878014	Isoform 1 of Ankyrin repeat and BTB/POZ domain-containing protein BTBD11	VGSIAELSDLVSR		72.48	1	673.371	1344.72	1344.73	2	51.65			IPI00163085	Isoform 1 of Angiomotin	LQKVETEIQR	Deamidation (NQ)-Q2	16.89	1	622.851	1243.68	1243.69	2	30.24
IPI00007334	Isoform 1 of Apoptotic chromatin condensation inducer in the nucleus	GVPAGNSDTEGGQPGR		101.73	1	749.848	1497.68	1497.68	2	23.74			IPI00163085	Isoform 1 of Angiomotin	MHDFNR		21.85	1	410.182	818.349	818.35	2	24.31
IPI00007334	Isoform 1 of Apoptotic chromatin condensation inducer in the nucleus	LSEGSQPAEEEEDQETPSR		75.09	1	1059.46	2116.9	2116.91	2	28.61			IPI00163085	Isoform 1 of Angiomotin	MHQDEGLR		43.75	1	493.23	984.445	984.445	2	22.78
IPI00007334	Isoform 1 of Apoptotic chromatin condensation inducer in the nucleus	SQEQEVLER		50.7	1	559.278	1116.54	1116.54	2	30.06			IPI00163085	Isoform 1 of Angiomotin	MQNNEELPTYEEAK	Oxidation (M)-M1	40.23	1	856.377	1710.74	1710.74	2	34.36
IPI00185027	Isoform 1 of Arginine-glutamic acid dipeptide repeats protein	DDTTLNALNTLHESGYDAGK		61.93	1	712.334	2133.98	2133.98	3	44.39			IPI00163085	Isoform 1 of Angiomotin	NKLEGEIRR		26.62	1	557.821	1113.63	1113.63	2	27.51
IPI00185027	Isoform 1 of Arginine-glutamic acid dipeptide repeats protein	EKVASDTEEADRTSSK		60.85	1	584.946	1751.82	1751.82	3	20.68			IPI00163085	Isoform 1 of Angiomotin	NSEEQPSGGTTVLQR		100.36	1	801.892	1601.76	1601.77	2	30.68
IPI00185027	Isoform 1 of Arginine-glutamic acid dipeptide repeats protein	ELFISDYVDTYHAAALR		100.38	1	992.496	1982.97	1982.98	2	53.33			IPI00163085	Isoform 1 of Angiomotin	QLAEKEYEGSEDTR		25.18	1	552.256	1653.75	1653.75	3	27.93
IPI00185027	Isoform 1 of Arginine-glutamic acid dipeptide repeats protein	HCFTTTSK	Carbamidomethyl (C)-C2	26.35	1	491.226	980.439	980.437	2	20.83			IPI00163085	Isoform 1 of Angiomotin	QLAEKEYEGSEDTRK		52.7	1	891.93	1781.84	1781.85	2	26.26
IPI00185027	Isoform 1 of Arginine-glutamic acid dipeptide repeats protein	HNENDSGRELVITDPVIK		29.99	1	679.352	2035.03	2035.03	3	42.13			IPI00163085	Isoform 1 of Angiomotin	TEGRPSVQR		25.02	1	515.276	1028.54	1028.54	2	19.71
IPI00185027	Isoform 1 of Arginine-glutamic acid dipeptide repeats protein	KREEAIEK		41.48	1	501.782	1001.55	1001.55	2	15.5			IPI00163085	Isoform 1 of Angiomotin	YQHPPEYGAARPAQDISLPLSAR		59.67	1	635.08	2536.28	2536.29	4	43.46
IPI00185027	Isoform 1 of Arginine-glutamic acid dipeptide repeats protein	KVKEEASSPLK		33.84	1	608.35	1214.69	1214.69	2	24.58			IPI00007334	Isoform 1 of Apoptotic chromatin condensation inducer in the nucleus	GVPAGNSDTEGGQPGR		63.06	1	749.848	1497.68	1497.68	2	23.88
IPI00185027	Isoform 1 of Arginine-glutamic acid dipeptide repeats protein	LKKEGDKQL		37.95	1	353.545	1057.61	1057.61	3	19.79			IPI00007334	Isoform 1 of Apoptotic chromatin condensation inducer in the nucleus	RLSQPESAEK		42.38	1	572.802	1143.59	1143.59	2	21.42
IPI00185027	Isoform 1 of Arginine-glutamic acid dipeptide repeats protein	SVNDEGSSDPKDIDQDNR		40.52	1	664.292	1989.85	1989.85	3	26.81			IPI00007334	Isoform 1 of Apoptotic chromatin condensation inducer in the nucleus	TALHGVK		33.31	1	363.22	724.423	724.426	2	21.4
IPI00185027	Isoform 1 of Arginine-glutamic acid dipeptide repeats protein	TADKDKDKDK	Sumo 3 deamidated (K)-K8|Sumo 3 deamidated (K)-K10	17.98	1	693.98	2078.94	2078.92	3	58.57			IPI00291560	Isoform 1 of Arginase-1	GGVEEGPTVLR		50.56	1	557.298	1112.58	1112.58	2	35.8
IPI00185027	Isoform 1 of Arginine-glutamic acid dipeptide repeats protein	TLSEYARPHVMSPTNR		41.96	1	620.313	1857.92	1857.92	3	34.99			IPI00291560	Isoform 1 of Arginase-1	TGLLSGLDIMEVNPSLGK		53.92	1	922.496	1842.98	1842.98	2	59.3
IPI00185027	Isoform 1 of Arginine-glutamic acid dipeptide repeats protein	VASDTEEADRTSSKK		62.89	1	406.701	1622.77	1622.78	4	16.05			IPI00470537	Isoform 1 of AT-rich interactive domain-containing protein 2	RPAEDTDRETVAGIPNK		72.53	1	623.653	1867.94	1867.94	3	30.76
IPI00185027	Isoform 1 of Arginine-glutamic acid dipeptide repeats protein	VDSFFYILGYNPETR		55.76	1	910.949	1819.88	1819.88	2	61.14			IPI00470537	Isoform 1 of AT-rich interactive domain-containing protein 2	TPVANQSSNLTATQMSFPVQGVHTVAQTVSR		150.99	1	1086.22	3255.63	3255.64	3	49.18
IPI00470537	Isoform 1 of AT-rich interactive domain-containing protein 2	GLAFLDELR		20.66	1	517.287	1032.56	1032.56	2	55.38			IPI00180154	Isoform 1 of Ataxin-2	DMDSSYAKR		28.1	1	536.739	1071.47	1071.46	2	24.37
IPI00470537	Isoform 1 of AT-rich interactive domain-containing protein 2	TPVANQSSNLTATQMSFPVQGVHTVAQTVSR		115.72	1	1086.22	3255.63	3255.64	3	49.23			IPI00180154	Isoform 1 of Ataxin-2	GLPQSTISFDGIYANMR		85.64	1	935.463	1868.91	1868.91	2	53.55
IPI00306748	Isoform 1 of ATP-binding cassette sub-family B member 7 mitochondrial	KENISKEEER		49.17	1	421.217	1260.63	1260.63	3	16.55			IPI00180154	Isoform 1 of Ataxin-2	LQPSSTSESMDQLLNK		36.04	1	889.444	1776.86	1776.87	2	44.22
IPI00306748	Isoform 1 of ATP-binding cassette sub-family B member 7 mitochondrial	LSTVVDADEIIVLDQGK		58.24	1	907.993	1813.97	1813.97	2	51.75			IPI00180154	Isoform 1 of Ataxin-2	NSSEREGHSINTR		39.31	1	496.236	1485.69	1485.69	3	17.39
IPI00002372	Isoform 1 of ATP-binding cassette sub-family D member 3	DQVIYPDGREDQK		53.84	1	781.877	1561.74	1561.74	2	30.22			IPI00180154	Isoform 1 of Ataxin-2	QNSPAGNKENIKPNETSPSFSK		40.32	1	594.296	2373.16	2373.15	4	31.27
IPI00002372	Isoform 1 of ATP-binding cassette sub-family D member 3	LITNSEEIAFYNGNKR		56.83	1	934.981	1867.94	1867.95	2	41.95			IPI00180154	Isoform 1 of Ataxin-2	STSHTSDFNPNSGSDQR		76.77	1	612.93	1835.77	1835.77	3	26.66
IPI00002372	Isoform 1 of ATP-binding cassette sub-family D member 3	MGNLDNR		22.98	1	410.192	818.37	818.37	2	24.32			IPI00180154	Isoform 1 of Ataxin-2	TSPSGGTWSSVVSGVPR		72.06	1	830.92	1659.82	1659.83	2	45.33
IPI00409671	Isoform 1 of ATP-dependent RNA helicase DDX42	HGDGYRHPESSSR		53.38	1	495.559	1483.66	1483.65	3	15.28			IPI00180154	Isoform 1 of Ataxin-2	VALENDDRSEEEKYTAVQR		58.96	1	751.364	2251.07	2251.07	3	33.27
IPI00409671	Isoform 1 of ATP-dependent RNA helicase DDX42	NFYNEHEEITNLTPQQLIDLR		33.89	1	863.099	2586.27	2586.28	3	54.23			IPI00456359	Isoform 1 of Ataxin-2-like protein	DKFTDSAIAMNSK		54.28	1	714.346	1426.68	1426.68	2	36.23
IPI00747002	Isoform 1 of Axin-1	AVTLGQFK		19.21	1	432.253	862.491	862.492	2	40.1			IPI00456359	Isoform 1 of Ataxin-2-like protein	STSTPTSPGPR		19.72	1	544.272	1086.53	1086.53	2	22.83
IPI00747002	Isoform 1 of Axin-1	FAEELIHR		34.42	1	507.772	1013.53	1013.53	2	37.06			IPI00550523	Isoform 1 of Atlastin-3	DAVVGRPSMDKK		26.83	1	651.845	1301.68	1301.68	2	26.41
IPI00747002	Isoform 1 of Axin-1	GVGIKGETSTATPR		64.86	1	687.371	1372.73	1372.73	2	28.44			IPI00550523	Isoform 1 of Atlastin-3	DQHSFELDEK		62.97	1	624.281	1246.55	1246.55	2	34.45
IPI00747002	Isoform 1 of Axin-1	GYSESVGAAPNASDGLAHSGK		95.04	1	987.963	1973.91	1973.91	2	32.94			IPI00550523	Isoform 1 of Atlastin-3	SMLQATAEANNLAAAASAK		101.74	1	916.963	1831.91	1831.91	2	45.49
IPI00747002	Isoform 1 of Axin-1	LDAAGLHHHR		71.87	1	563.796	1125.58	1125.58	2	22.7			IPI00218019	Isoform 1 of Basigin	GGVVLKEDALPGQK		76.03	1	705.903	1409.79	1409.79	2	37.11
IPI00747002	Isoform 1 of Axin-1	MPVALGGAASGHGK	Oxidation (M)-M1	40.51	1	634.825	1267.63	1267.64	2	27.91			IPI00218019	Isoform 1 of Basigin	ITDSEDKALMNGSESR	Deamidation (NQ)-N11	36.44	1	585.267	1752.78	1752.78	3	31.79
IPI00747002	Isoform 1 of Axin-1	RRLEEEEKR		54.02	1	622.84	1243.66	1243.67	2	16.08			IPI00218019	Isoform 1 of Basigin	SELHIENLNMEADPGQYR		78.53	1	1058.49	2114.97	2114.97	2	44.94
IPI00747002	Isoform 1 of Axin-1	SASTEVPGASEDAEK		54.87	1	739.337	1476.66	1476.66	2	27.6			IPI00218019	Isoform 1 of Basigin	SESVPPVTDWAWYK		68.32	1	832.904	1663.79	1663.79	2	53.5
IPI00747002	Isoform 1 of Axin-1	SASTEVPGASEDAEKNQK		80.43	1	924.438	1846.85	1846.86	2	26.55			IPI00218019	Isoform 1 of Basigin	SSEHINEGETAMLVCK	Carbamidomethyl (C)-C15	95.33	1	902.915	1803.81	1803.82	2	38.21
IPI00747002	Isoform 1 of Axin-1	SRGYSESVGAAPNASDGLAHSGK		72.22	1	740.021	2217.04	2217.04	3	31.58			IPI00218019	Isoform 1 of Basigin	SSEHINEGETAMLVCK	Oxidation (M)-M12|Carbamidomethyl (C)-C15	16.73	1	607.61	1819.81	1819.81	3	34.72
IPI00218019	Isoform 1 of Basigin	GGVVLKEDALPGQK		78.51	1	705.905	1409.79	1409.8	2	36.79			IPI00218019	Isoform 1 of Basigin	WLKGGVVLKEDALPGQK		54.29	1	460.269	1837.05	1837.05	4	43.14
IPI00218019	Isoform 1 of Basigin	SELHIENLNMEADPGQYR		66.93	1	705.997	2114.97	2114.97	3	44.56			IPI00006079	Isoform 1 of Bcl-2-associated transcription factor 1	ESDGFREEK		34.95	1	548.748	1095.48	1095.48	2	23.14
IPI00218019	Isoform 1 of Basigin	SESVPPVTDWAWYK		61.7	1	832.903	1663.79	1663.79	2	53.34			IPI00006079	Isoform 1 of Bcl-2-associated transcription factor 1	LLASTLVHSVKK		26.62	1	324.707	1294.8	1294.8	4	38.68
IPI00218019	Isoform 1 of Basigin	SSEHINEGETAMLVCK	Carbamidomethyl (C)-C15	73.75	1	902.915	1803.81	1803.82	2	38.04			IPI00006079	Isoform 1 of Bcl-2-associated transcription factor 1	NTEEEGLKYK		41.75	1	605.802	1209.59	1209.59	2	27.94
IPI00337426	Isoform 1 of BMP-2-inducible protein kinase	ADHNTVLPGRPR		54.48	1	666.861	1331.71	1331.71	2	27.99			IPI00006079	Isoform 1 of Bcl-2-associated transcription factor 1	RPKEEEWDPEYTPK		20.11	1	601.957	1802.85	1802.85	3	36.33
IPI00337426	Isoform 1 of BMP-2-inducible protein kinase	ADIWALGCLLYK	Carbamidomethyl (C)-C8	30.27	1	711.877	1421.74	1421.74	2	62.13			IPI00006079	Isoform 1 of Bcl-2-associated transcription factor 1	SAAMTLNER		30.36	1	496.745	991.476	991.475	2	30.66
IPI00337426	Isoform 1 of BMP-2-inducible protein kinase	AGQVVNQMNKK		63.82	1	608.827	1215.64	1215.64	2	23.65			IPI00006079	Isoform 1 of Bcl-2-associated transcription factor 1	TIAPQNAPR		28.36	1	484.269	966.525	966.524	2	26.31
IPI00337426	Isoform 1 of BMP-2-inducible protein kinase	ANSATTATPSVLTIQSSATPVK		108.46	1	1073.08	2144.13	2144.14	2	42.75			IPI00006079	Isoform 1 of Bcl-2-associated transcription factor 1	TIAPQNAPR	Deamidation (NQ)-Q5|Deamidation (NQ)-N6	22.46	1	485.253	968.493	968.492	2	24.37
IPI00337426	Isoform 1 of BMP-2-inducible protein kinase	APEMINLYGGKPITTK		111.32	1	866.969	1731.92	1731.92	2	44.31			IPI00006079	Isoform 1 of Bcl-2-associated transcription factor 1	VFKEENQKGDKK		69.87	1	483.928	1448.76	1448.76	3	15.17
IPI00337426	Isoform 1 of BMP-2-inducible protein kinase	DGVNVVEEEIKK		27.9	1	679.866	1357.71	1357.72	2	39.75			IPI00337426	Isoform 1 of BMP-2-inducible protein kinase	AGQVVNQMNKK		40.57	1	608.827	1215.64	1215.64	2	23.81
IPI00337426	Isoform 1 of BMP-2-inducible protein kinase	FLNPQKDGVNVVEEEIKK		56.78	1	696.044	2085.11	2085.11	3	45.05			IPI00337426	Isoform 1 of BMP-2-inducible protein kinase	ANSATTATPSVLTIQSSATPVK		103.82	1	1073.08	2144.13	2144.14	2	43.18
IPI00337426	Isoform 1 of BMP-2-inducible protein kinase	FPAAGLEQEEFDVFTK		56.86	1	914.446	1826.87	1826.88	2	54.82			IPI00337426	Isoform 1 of BMP-2-inducible protein kinase	APEMINLYGGKPITTK		91	1	866.969	1731.92	1731.92	2	44.39
IPI00337426	Isoform 1 of BMP-2-inducible protein kinase	ITDTIGPTETSIAPR		71.73	1	786.418	1570.82	1570.82	2	38.94			IPI00337426	Isoform 1 of BMP-2-inducible protein kinase	DGVNVVEEEIKK		25.42	1	453.578	1357.71	1357.71	3	40.02
IPI00337426	Isoform 1 of BMP-2-inducible protein kinase	KTSVQGQVQK		44.79	1	551.814	1101.61	1101.61	2	17.1			IPI00337426	Isoform 1 of BMP-2-inducible protein kinase	FLNPQKDGVNVVEEEIKK		51.45	1	522.285	2085.11	2085.11	4	45.12
IPI00337426	Isoform 1 of BMP-2-inducible protein kinase	LQQLHLQHR		71.44	1	586.836	1171.66	1171.66	2	30.74			IPI00337426	Isoform 1 of BMP-2-inducible protein kinase	FPAAGLEQEEFDVFTK		126.04	1	914.446	1826.87	1826.88	2	54.79
IPI00337426	Isoform 1 of BMP-2-inducible protein kinase	LTEEELLDREFDLLR		42.89	1	945.995	1889.97	1889.98	2	58.26			IPI00337426	Isoform 1 of BMP-2-inducible protein kinase	ITDTIGPTETSIAPR		71.01	1	786.418	1570.82	1570.82	2	39.19
IPI00337426	Isoform 1 of BMP-2-inducible protein kinase	NISNPPDMSGWNPFGEDNFSK		90.49	1	1177.02	2352.01	2352.02	2	54.65			IPI00337426	Isoform 1 of BMP-2-inducible protein kinase	LQQLHLQHR		43.8	1	391.56	1171.66	1171.66	3	30.8
IPI00337426	Isoform 1 of BMP-2-inducible protein kinase	SESNEDLFGLVPFDEITGSQQQK		50.13	1	1284.61	2567.2	2567.21	2	59.86			IPI00337426	Isoform 1 of BMP-2-inducible protein kinase	LTEEELLDREFDLLR		40.22	1	945.997	1889.97	1889.98	2	58.06
IPI00337426	Isoform 1 of BMP-2-inducible protein kinase	SVADKEAIANFTNQK		118.68	1	818.42	1634.83	1634.83	2	37.77			IPI00337426	Isoform 1 of BMP-2-inducible protein kinase	NISNPPDMSGWNPFGEDNFSK		87.86	1	1177.02	2352.01	2352.02	2	54.55
IPI00337426	Isoform 1 of BMP-2-inducible protein kinase	SVDVFGSTPFQPFLTSTSK		92.14	1	1023.02	2044.02	2044.02	2	58.47			IPI00337426	Isoform 1 of BMP-2-inducible protein kinase	SESNEDLFGLVPFDEITGSQQQK		73.15	1	1284.61	2567.2	2567.21	2	60.13
IPI00337426	Isoform 1 of BMP-2-inducible protein kinase	VLAPGEFGNHRPK		31.74	1	474.593	1420.76	1420.76	3	32.84			IPI00337426	Isoform 1 of BMP-2-inducible protein kinase	SVADKEAIANFTNQK		119.94	1	818.42	1634.83	1634.83	2	37.92
IPI00337426	Isoform 1 of BMP-2-inducible protein kinase	VLQQLQQGDWR		76.3	1	685.863	1369.71	1369.71	2	41.45			IPI00337426	Isoform 1 of BMP-2-inducible protein kinase	SVDVFGSTPFQPFLTSTSK		56.1	1	1023.02	2044.02	2044.02	2	58.61
IPI00069817	Isoform 1 of Bromodomain adjacent to zinc finger domain protein 1B	RTPIGTDR		29.59	1	458.254	914.493	914.493	2	21.44			IPI00337426	Isoform 1 of BMP-2-inducible protein kinase	TPIIHR		51.63	1	368.727	735.439	735.439	2	25.78
IPI00069817	Isoform 1 of Bromodomain adjacent to zinc finger domain protein 1B	STGSSQLTHK		36.74	1	523.267	1044.52	1044.52	2	16.73			IPI00337426	Isoform 1 of BMP-2-inducible protein kinase	VLAPGEFGNHRPK		38.71	1	711.386	1420.76	1420.76	2	33.04
IPI00440727	Isoform 1 of Bromodomain-containing protein 4	AASVVQPQPLVVVK		40.41	1	717.938	1433.86	1433.86	2	42.46			IPI00337426	Isoform 1 of BMP-2-inducible protein kinase	VLQQLQQGDWR		80.93	1	685.863	1369.71	1369.71	2	41.58
IPI00440727	Isoform 1 of Bromodomain-containing protein 4	ALKAQAEHAEKEKER		32.51	1	435.236	1736.92	1736.92	4	21			IPI00440727	Isoform 1 of Bromodomain-containing protein 4	AASVVQPQPLVVVK		52.91	1	717.938	1433.86	1433.86	2	42.66
IPI00440727	Isoform 1 of Bromodomain-containing protein 4	DVPDSQQHPAPEK		60.31	1	724.345	1446.67	1446.68	2	23.2			IPI00440727	Isoform 1 of Bromodomain-containing protein 4	ALKAQAEHAEKEKER		63.48	1	435.236	1736.92	1736.92	4	21.11
IPI00440727	Isoform 1 of Bromodomain-containing protein 4	HPTTPSSTAK		31.64	1	513.764	1025.51	1025.51	2	15.19			IPI00440727	Isoform 1 of Bromodomain-containing protein 4	DAQEFGADVR		38.64	1	554.253	1106.5	1106.49	2	33.32
IPI00440727	Isoform 1 of Bromodomain-containing protein 4	IKNMGSWASLVQK		65.61	1	731.398	1460.78	1460.78	2	46.22			IPI00440727	Isoform 1 of Bromodomain-containing protein 4	DVPDSQQHPAPEK		55.74	1	724.344	1446.67	1446.67	2	23.49
IPI00440727	Isoform 1 of Bromodomain-containing protein 4	INELPTEETEIMIVQAK		80.73	1	979.513	1957.01	1957.01	2	49.94			IPI00440727	Isoform 1 of Bromodomain-containing protein 4	ESSRPVKPPKK		32.11	1	418.251	1251.73	1251.73	3	15.3
IPI00440727	Isoform 1 of Bromodomain-containing protein 4	KKRKPQAEKVDVIAGSSK		79.25	1	657.057	1968.15	1968.15	3	25.18			IPI00440727	Isoform 1 of Bromodomain-containing protein 4	ESSRPVKPPKKDVPDSQQHPAPEK		21.77	1	671.106	2680.39	2680.4	4	23.96
IPI00440727	Isoform 1 of Bromodomain-containing protein 4	KNNSSNSNVSKKEPAPMK	Deamidation (NQ)-N6	44.05	1	654.336	1959.97	1959.99	3	21.88			IPI00440727	Isoform 1 of Bromodomain-containing protein 4	HPTTPSSTAK		34.81	1	513.764	1025.51	1025.51	2	15.56
IPI00440727	Isoform 1 of Bromodomain-containing protein 4	KPQAEKVDVIAGSSK		37.68	1	519.625	1555.86	1555.85	3	29.08			IPI00440727	Isoform 1 of Bromodomain-containing protein 4	IKNMGSWASLVQK	Deamidation (NQ)-N3|Oxidation (M)-M4	18.53	1	739.884	1477.76	1477.75	2	33.36
IPI00440727	Isoform 1 of Bromodomain-containing protein 4	KPQAEKVDVIAGSSK	Deamidation (NQ)-Q3	29.19	1	519.96	1556.84	1556.86	3	29.39			IPI00440727	Isoform 1 of Bromodomain-containing protein 4	INELPTEETEIMIVQAK		113.69	1	979.513	1957.01	1957.01	2	50.05
IPI00440727	Isoform 1 of Bromodomain-containing protein 4	LQDVFEMR		24.66	1	519.259	1036.5	1036.5	2	46.25			IPI00440727	Isoform 1 of Bromodomain-containing protein 4	KKRKPQAEKVDVIAGSSK		59.97	1	657.057	1968.15	1968.15	3	25.7
IPI00440727	Isoform 1 of Bromodomain-containing protein 4	NMGSWASLVQK		67.78	1	610.808	1219.6	1219.6	2	48.23			IPI00440727	Isoform 1 of Bromodomain-containing protein 4	KNNSSNSNVSKKEPAPMK		25.52	1	654.002	1958.98	1958.99	3	22.11
IPI00440727	Isoform 1 of Bromodomain-containing protein 4	NSNPDEIEIDFETLKPSTLR		68.8	1	1159.58	2317.14	2317.15	2	53.43			IPI00440727	Isoform 1 of Bromodomain-containing protein 4	KPQAEKVDVIAGSSK		47.61	1	519.625	1555.86	1555.85	3	29.48
IPI00440727	Isoform 1 of Bromodomain-containing protein 4	QEQQQQQQQQAAAVAAAATPQAQSSQPQSMLDQQR		81.65	1	952.711	3806.8	3806.81	4	39.67			IPI00440727	Isoform 1 of Bromodomain-containing protein 4	NSNPDEIEIDFETLKPSTLR		42	1	773.389	2317.14	2317.14	3	53.17
IPI00440727	Isoform 1 of Bromodomain-containing protein 4	QLSLDINKLPGEK		60.29	1	727.915	1453.81	1453.82	2	45.32			IPI00440727	Isoform 1 of Bromodomain-containing protein 4	QEQQQQQQQQAAAVAAAATPQAQSSQPQSMLDQQR		100.86	1	1269.94	3806.8	3806.81	3	40.03
IPI00440727	Isoform 1 of Bromodomain-containing protein 4	RKPQAEKVDVIAGSSK		103.27	1	856.988	1711.96	1711.96	2	27.78			IPI00440727	Isoform 1 of Bromodomain-containing protein 4	RKPQAEKVDVIAGSSK		70.46	1	428.998	1711.96	1711.96	4	28.1
IPI00440727	Isoform 1 of Bromodomain-containing protein 4	RKPQAEKVDVIAGSSK	Deamidation (NQ)-Q4	36.82	1	429.248	1712.94	1712.96	4	28			IPI00440727	Isoform 1 of Bromodomain-containing protein 4	SDPYSTGHLR		63.14	1	566.772	1131.53	1131.53	2	28.67
IPI00440727	Isoform 1 of Bromodomain-containing protein 4	SDPYSTGHLR		47.66	1	378.185	1131.53	1131.53	3	28.52			IPI00440727	Isoform 1 of Bromodomain-containing protein 4	SREDEDALEQAR		87.07	1	709.83	1417.64	1417.65	2	29.24
IPI00440727	Isoform 1 of Bromodomain-containing protein 4	SREDEDALEQAR		90.77	1	709.829	1417.64	1417.64	2	29.09			IPI00440727	Isoform 1 of Bromodomain-containing protein 4	SREDEDALEQARR		38.43	1	525.589	1573.74	1573.74	3	28.27
IPI00440727	Isoform 1 of Bromodomain-containing protein 4	SSSDSFEQFR		63.39	1	595.259	1188.5	1188.5	2	38.15			IPI00440727	Isoform 1 of Bromodomain-containing protein 4	SSSDSFEQFRR		29.63	1	449.209	1344.61	1344.61	3	35.73
IPI00440727	Isoform 1 of Bromodomain-containing protein 4	TPMDMGTIKK		18.89	1	561.288	1120.56	1120.56	2	32.46			IPI00440727	Isoform 1 of Bromodomain-containing protein 4	TPVAPKKDLK		30.24	1	366.23	1095.67	1095.67	3	23.15
IPI00440727	Isoform 1 of Bromodomain-containing protein 4	VVHIIQSR		29.84	1	476.29	950.566	950.565	2	30.26			IPI00440727	Isoform 1 of Bromodomain-containing protein 4	VVHIIQSR		40.48	1	317.863	950.566	950.567	3	30.27
IPI00001707	Isoform 1 of Bromodomain-containing protein 7	AVTNFGVPVEVFDSEEAEIFQK		36.42	1	819.073	2454.2	2454.2	3	61.52			IPI00440727	Isoform 1 of Bromodomain-containing protein 4	YNPPDHEVVAMAR		48.7	1	749.861	1497.7	1497.71	2	36.43
IPI00001707	Isoform 1 of Bromodomain-containing protein 7	AVTNFGVPVEVFDSEEAEIFQK	Deamidation (NQ)-N4	17.63	1	819.405	2455.18	2455.19	3	61.55			IPI00333010	Isoform 1 of Calcium homeostasis endoplasmic reticulum protein	DKWDQYK		18.84	1	491.735	981.456	981.455	2	30.96
IPI00001707	Isoform 1 of Bromodomain-containing protein 7	TLQEMEMSLPEDEGHTR		27.91	1	668.299	2001.88	2001.88	3	43.58			IPI00333010	Isoform 1 of Calcium homeostasis endoplasmic reticulum protein	MGWSGSGGLGAK		16.62	1	554.266	1106.52	1106.52	2	38.85
IPI00645518	Isoform 1 of CDP-diacylglycerol--inositol 3-phosphatidyltransferase	ALNQGTR		40.82	1	380.21	758.403	758.405	2	16.81			IPI00333010	Isoform 1 of Calcium homeostasis endoplasmic reticulum protein	NSEGWEQNGLYEFFR		60.82	1	938.422	1874.82	1874.83	2	58.83
IPI00645518	Isoform 1 of CDP-diacylglycerol--inositol 3-phosphatidyltransferase	MIDLSGNPVLR		57.12	1	607.832	1213.65	1213.65	2	46.38			IPI00552142	Isoform 1 of Centromere protein I	GIYIDPEILEK		31.39	1	645.355	1288.69	1288.7	2	50.77
IPI00815893	Isoform 1 of Chromodomain-helicase-DNA-binding protein 2	DDVTGGKKPFRPEASGSSR		18.76	1	664.336	1989.99	1989.99	3	27.57			IPI00552142	Isoform 1 of Centromere protein I	TSQGSSSFQTTLSAWK		56.57	1	858.424	1714.82	1714.83	2	48.21
IPI00815893	Isoform 1 of Chromodomain-helicase-DNA-binding protein 2	DNYNHPNKR		38.92	1	386.52	1156.54	1156.54	3	12.17			IPI00815893	Isoform 1 of Chromodomain-helicase-DNA-binding protein 2	DAELVDKSVADLKR		24.86	1	520.285	1557.84	1557.83	3	39.65
IPI00815893	Isoform 1 of Chromodomain-helicase-DNA-binding protein 2	ENEVSTSATDELLSQFK		149.98	1	949.457	1896.9	1896.9	2	52.62			IPI00815893	Isoform 1 of Chromodomain-helicase-DNA-binding protein 2	DNYNHPNKR		45.32	1	386.52	1156.54	1156.54	3	12.21
IPI00815893	Isoform 1 of Chromodomain-helicase-DNA-binding protein 2	FGLPLER		33.94	1	416.24	830.465	830.466	2	45.52			IPI00815893	Isoform 1 of Chromodomain-helicase-DNA-binding protein 2	ENEVSTSATDELLSQFK		56.13	1	949.458	1896.9	1896.9	2	52.54
IPI00815893	Isoform 1 of Chromodomain-helicase-DNA-binding protein 2	FNYGGGNNNPPWGSDR		84.23	1	876.381	1750.74	1750.75	2	40.98			IPI00815893	Isoform 1 of Chromodomain-helicase-DNA-binding protein 2	FGAEDLFKELEGEESEPQEMDIDEILR		75.86	1	1056.83	3167.45	3167.46	3	64.24
IPI00815893	Isoform 1 of Chromodomain-helicase-DNA-binding protein 2	GHRDYYDR		29.2	1	361.166	1080.47	1080.48	3	20.88			IPI00815893	Isoform 1 of Chromodomain-helicase-DNA-binding protein 2	FNYGGGNNNPPWGSDR		90.08	1	876.383	1750.74	1750.75	2	41.18
IPI00815893	Isoform 1 of Chromodomain-helicase-DNA-binding protein 2	HFSNADRGDWQR		68.35	1	496.895	1487.67	1487.66	3	29.21			IPI00815893	Isoform 1 of Chromodomain-helicase-DNA-binding protein 2	HFSNADRGDWQR		41.88	1	496.895	1487.67	1487.66	3	29.29
IPI00815893	Isoform 1 of Chromodomain-helicase-DNA-binding protein 2	ILPVETDKKPQGK		29.65	1	726.926	1451.83	1451.84	2	28.33			IPI00815893	Isoform 1 of Chromodomain-helicase-DNA-binding protein 2	KPFRPEASGSSR		43.39	1	440.234	1317.68	1317.68	3	22.99
IPI00815893	Isoform 1 of Chromodomain-helicase-DNA-binding protein 2	KFNYGGGNNNPPWGSDR		84.85	1	940.429	1878.84	1878.84	2	39.04			IPI00815893	Isoform 1 of Chromodomain-helicase-DNA-binding protein 2	KQVNIYR		46.79	1	460.769	919.524	919.524	2	27.1
IPI00815893	Isoform 1 of Chromodomain-helicase-DNA-binding protein 2	KPFRPEASGSSR		25.35	1	659.847	1317.68	1317.68	2	23.16			IPI00815893	Isoform 1 of Chromodomain-helicase-DNA-binding protein 2	LAETRENEVSTSATDELLSQFK		76.94	1	823.41	2467.21	2467.21	3	52.11
IPI00815893	Isoform 1 of Chromodomain-helicase-DNA-binding protein 2	KQVNIYR		45.01	1	460.769	919.524	919.523	2	27.02			IPI00815893	Isoform 1 of Chromodomain-helicase-DNA-binding protein 2	MSDHRPAMGYHGQGPSDHYR		45.25	1	767.001	2297.98	2297.98	3	29.33
IPI00815893	Isoform 1 of Chromodomain-helicase-DNA-binding protein 2	KRPYDQYSSDRDHR		27.99	1	608.291	1821.85	1821.85	3	23.42			IPI00815893	Isoform 1 of Chromodomain-helicase-DNA-binding protein 2	MSDHRPAMGYHGQGPSDHYR	Deamidation (NQ)-Q13	62.68	1	575.752	2298.96	2298.98	4	29.3
IPI00815893	Isoform 1 of Chromodomain-helicase-DNA-binding protein 2	LAETRENEVSTSATDELLSQFK		60.65	1	823.41	2467.21	2467.21	3	51.89			IPI00815893	Isoform 1 of Chromodomain-helicase-DNA-binding protein 2	NNSVILADEMGLGK		48.34	1	730.875	1459.73	1459.74	2	47.66
IPI00815893	Isoform 1 of Chromodomain-helicase-DNA-binding protein 2	MSDHRPAMGYHGQGPSDHYR		36.08	1	767.002	2297.98	2297.98	3	29.14			IPI00815893	Isoform 1 of Chromodomain-helicase-DNA-binding protein 2	RSDEFRPQNYHQQDFRR	Deamidation (NQ)-Q13	40.61	1	570.776	2279.06	2279.08	4	32.24
IPI00815893	Isoform 1 of Chromodomain-helicase-DNA-binding protein 2	QYQIVER		29.61	1	468.251	934.487	934.488	2	31.11			IPI00815893	Isoform 1 of Chromodomain-helicase-DNA-binding protein 2	RTVPKPR		28.4	1	427.272	852.529	852.53	2	16.37
IPI00815893	Isoform 1 of Chromodomain-helicase-DNA-binding protein 2	RSQEEEEQKKKDDVTGGKKPFRPEASGSSR		36.34	1	678.946	3389.69	3389.69	5	24.82			IPI00815893	Isoform 1 of Chromodomain-helicase-DNA-binding protein 2	SDEFRPQNYHQQDFR		15.8	1	656.298	1965.87	1965.87	3	35.51
IPI00815893	Isoform 1 of Chromodomain-helicase-DNA-binding protein 2	SDEFRPQNYHQQDFR		24.89	1	656.299	1965.87	1965.88	3	35.26			IPI00815893	Isoform 1 of Chromodomain-helicase-DNA-binding protein 2	SDEFRPQNYHQQDFRR		29.58	1	531.5	2121.97	2121.97	4	33.49
IPI00815893	Isoform 1 of Chromodomain-helicase-DNA-binding protein 2	SFHTDKLGEYK		32.7	1	442.223	1323.65	1323.65	3	32.22			IPI00815893	Isoform 1 of Chromodomain-helicase-DNA-binding protein 2	SFHTDKLGEYKQPLPPLHPAVSDPR	Deamidation (NQ)-Q12	27.74	1	566.899	2829.44	2829.46	5	40.74
IPI00815893	Isoform 1 of Chromodomain-helicase-DNA-binding protein 2	SGSYRPNNMSR		34.18	1	634.794	1267.57	1267.57	2	24.03			IPI00815893	Isoform 1 of Chromodomain-helicase-DNA-binding protein 2	SGSYRPNNMSR		48.54	1	634.794	1267.57	1267.57	2	24.27
IPI00815893	Isoform 1 of Chromodomain-helicase-DNA-binding protein 2	SGSYRPNNMSR	Oxidation (M)-M9	20.87	1	642.792	1283.57	1283.57	2	16.87			IPI00815893	Isoform 1 of Chromodomain-helicase-DNA-binding protein 2	SIIQHEEEFEMLHK		80.04	1	590.622	1768.85	1768.85	3	42.7
IPI00815893	Isoform 1 of Chromodomain-helicase-DNA-binding protein 2	SNSNPFNKEELTAILK		63.7	1	902.975	1803.94	1803.94	2	50.25			IPI00815893	Isoform 1 of Chromodomain-helicase-DNA-binding protein 2	SNSNPFNKEELTAILK		72.2	1	902.977	1803.94	1803.94	2	50.34
IPI00815893	Isoform 1 of Chromodomain-helicase-DNA-binding protein 2	SQEEEEQKKKDDVTGGK		27.26	1	484.49	1933.92	1933.93	4	17.57			IPI00815893	Isoform 1 of Chromodomain-helicase-DNA-binding protein 2	SQEEEEQKKKDDVTGGKKPFRPEASGSSR		60.23	1	647.726	3233.59	3233.59	5	26.2
IPI00815893	Isoform 1 of Chromodomain-helicase-DNA-binding protein 2	SQEEEEQKKKDDVTGGKKPFRPEASGSSR		134.91	1	1078.87	3233.59	3233.6	3	26.15			IPI00000846	Isoform 1 of Chromodomain-helicase-DNA-binding protein 4	ESMAGNKPANAVLHK		18.35	1	522.934	1565.8	1565.78	3	29.5
IPI00815893	Isoform 1 of Chromodomain-helicase-DNA-binding protein 2	SQEEEEQKKKDDVTGGKKPFRPEASGSSR	Deamidation (NQ)-Q7	71.85	1	540.105	3234.58	3234.59	6	26.06			IPI00000846	Isoform 1 of Chromodomain-helicase-DNA-binding protein 4	FSWAQGTDTILADEMGLGK		115.24	1	1020.49	2038.97	2038.97	2	59.67
IPI00815893	Isoform 1 of Chromodomain-helicase-DNA-binding protein 2	STLGQTDFPAHSR		31.44	1	708.847	1415.68	1415.68	2	33.42			IPI00000846	Isoform 1 of Chromodomain-helicase-DNA-binding protein 4	HHYEQQQEDLAR		52.06	1	777.359	1552.7	1552.7	2	25.14
IPI00815893	Isoform 1 of Chromodomain-helicase-DNA-binding protein 2	SVADLKR		30.55	1	394.735	787.455	787.456	2	24.22			IPI00000846	Isoform 1 of Chromodomain-helicase-DNA-binding protein 4	ILNHSVDKK		41.61	1	351.874	1052.6	1052.6	3	20.66
IPI00000846	Isoform 1 of Chromodomain-helicase-DNA-binding protein 4	AFLNAIMR		37.18	1	468.26	934.506	934.505	2	49.69			IPI00000846	Isoform 1 of Chromodomain-helicase-DNA-binding protein 4	LANRAPEPTPQQVAQQQ		75.85	1	938.49	1874.96	1874.97	2	32.19
IPI00000846	Isoform 1 of Chromodomain-helicase-DNA-binding protein 4	ERTEEPMETEPK		48.4	1	738.338	1474.66	1474.66	2	26.96			IPI00000846	Isoform 1 of Chromodomain-helicase-DNA-binding protein 4	LLDRNQDETEDTELQGMNEYLSSFK		58.66	1	992.46	2974.35	2974.36	3	55.01
IPI00000846	Isoform 1 of Chromodomain-helicase-DNA-binding protein 4	FSWAQGTDTILADEMGLGK		129.1	1	1020.49	2038.97	2038.97	2	59.71			IPI00000846	Isoform 1 of Chromodomain-helicase-DNA-binding protein 4	RKEEEEEDDDDDDSKEPK		56.3	1	552.731	2206.9	2206.9	4	16.82
IPI00000846	Isoform 1 of Chromodomain-helicase-DNA-binding protein 4	GGGNQVSLLNVVMDLK		52.5	1	822.445	1642.87	1642.88	2	63.1			IPI00295857	Isoform 1 of Coatomer subunit alpha	GITGVDLFGTTDAVVK		51.19	1	796.931	1591.85	1591.85	2	52.82
IPI00000846	Isoform 1 of Chromodomain-helicase-DNA-binding protein 4	HHYEQQQEDLAR		75.51	1	777.359	1552.7	1552.7	2	25.06			IPI00295857	Isoform 1 of Coatomer subunit alpha	HVLEGHDR		37.17	1	481.744	961.473	961.473	2	16.01
IPI00000846	Isoform 1 of Chromodomain-helicase-DNA-binding protein 4	LANRAPEPTPQQVAQQQ		85.62	1	938.489	1874.96	1874.96	2	32.14			IPI00394751	Isoform 1 of Constitutive coactivator of PPAR-gamma-like protein 2	NQVGTISAGKPMFSHQVPQK	Deamidation (NQ)-Q16	43.05	1	719.043	2154.09	2154.11	3	37.18
IPI00000846	Isoform 1 of Chromodomain-helicase-DNA-binding protein 4	LLDRNQDETEDTELQGMNEYLSSFK		28.25	1	992.461	2974.35	2974.36	3	55			IPI00394751	Isoform 1 of Constitutive coactivator of PPAR-gamma-like protein 2	QQQQQHLHR		42.81	1	401.543	1201.61	1201.61	3	14.82
IPI00000846	Isoform 1 of Chromodomain-helicase-DNA-binding protein 4	MPNGMYDGSALIR		90.78	1	712.837	1423.66	1423.66	2	44.53			IPI00654682	Isoform 1 of Cyclin-L1	LSPTPSMQDGLDLPSETDLR		116.34	1	1086.53	2171.04	2171.05	2	48.83
IPI00000846	Isoform 1 of Chromodomain-helicase-DNA-binding protein 4	TEEPMETEPK		26.1	1	595.766	1189.52	1189.52	2	27.2			IPI00654682	Isoform 1 of Cyclin-L1	RKVALQEAK		42.29	1	348.217	1041.63	1041.63	3	22.28
IPI00000846	Isoform 1 of Chromodomain-helicase-DNA-binding protein 4	YGMPPQDAFTTQWLVR		33.25	1	955.468	1908.92	1908.92	2	55.67			IPI00654682	Isoform 1 of Cyclin-L1	RTPSPLILDQNYINTK		72.27	1	937.018	1872.01	1872.02	2	45.93
IPI00239815	Isoform 1 of Cirhin	LFQITPDKIQFER		40.46	1	817.95	1633.88	1633.89	2	49.21			IPI00654682	Isoform 1 of Cyclin-L1	TPSPLILDQNYINTK		48.2	1	858.964	1715.91	1715.91	2	48.01
IPI00239815	Isoform 1 of Cirhin	LFSAGLNGEIMEYDLQALNIK	Deamidation (NQ)-N7	64.5	1	1170.6	2339.17	2339.18	2	62.09			IPI00654682	Isoform 1 of Cyclin-L1	VALQEAK		42.96	1	379.725	757.433	757.435	2	25.55
IPI00239815	Isoform 1 of Cirhin	NADHLLHLK		44.57	1	354.206	1059.58	1059.6	3	35.26			IPI00644231	Isoform 1 of Cytoplasmic FMR1-interacting protein 1	FINMFAVLDELK		66.67	1	720.385	1438.75	1438.76	2	69.19
IPI00239815	Isoform 1 of Cirhin	SALQILFSEDSTK		82.21	1	719.875	1437.74	1437.74	2	53.9			IPI00644231	Isoform 1 of Cytoplasmic FMR1-interacting protein 1	TMLESLIADK		54.83	1	560.8	1119.58	1119.58	2	50.74
IPI00239815	Isoform 1 of Cirhin	TDGTVEIYNLSANYFQEK		95.97	1	1046.5	2090.98	2090.98	2	52.59			IPI00644231	Isoform 1 of Cytoplasmic FMR1-interacting protein 1	YSNSEVVTGSGR		67.96	1	628.3	1254.58	1254.58	2	27.24
IPI00239815	Isoform 1 of Cirhin	TKPFQHHTHDVR		48.58	1	376.446	1501.75	1501.76	4	18.51			IPI00329216	Isoform 1 of DNA (cytosine-5)-methyltransferase 3A	GGAPAEGEGAAETLPEASR		63.4	1	885.42	1768.82	1768.83	2	33.57
IPI00239815	Isoform 1 of Cirhin	TLLYNPFPPTNESDVIR		75.98	1	988.511	1975.01	1975.01	2	52.6			IPI00329216	Isoform 1 of DNA (cytosine-5)-methyltransferase 3A	VIAGMNAVEENQGPGESQK	Deamidation (NQ)-N6|Deamidation (NQ)-Q18	16.29	1	980.453	1958.89	1958.89	2	53.24
IPI00024067	Isoform 1 of Clathrin heavy chain 1	ISGETIFVTAPHEATAGIIGVNR		64.95	1	785.088	2352.24	2352.24	3	50.44			IPI00219250	Isoform 1 of Dual specificity tyrosine-phosphorylation-regulated kinase 1A	AGESGHTVADYLK		81.93	1	674.331	1346.65	1346.65	2	38.17
IPI00024067	Isoform 1 of Clathrin heavy chain 1	LASTLVHLGEYQAAVDGAR		47.09	1	657.682	1970.02	1970.02	3	46.33			IPI00219250	Isoform 1 of Dual specificity tyrosine-phosphorylation-regulated kinase 1A	ARSDPTHQHR		15.49	1	402.203	1203.59	1203.59	3	11.93
IPI00024067	Isoform 1 of Clathrin heavy chain 1	LLLPWLEAR		16.78	1	555.838	1109.66	1109.66	2	60.82			IPI00219250	Isoform 1 of Dual specificity tyrosine-phosphorylation-regulated kinase 1A	AYDRVEQEWVAIK		58.85	1	803.916	1605.82	1605.82	2	45.19
IPI00024067	Isoform 1 of Clathrin heavy chain 1	LLYNNVSNFGR		64.55	1	648.838	1295.66	1295.66	2	43.19			IPI00219250	Isoform 1 of Dual specificity tyrosine-phosphorylation-regulated kinase 1A	FKDLILR		55.67	1	302.192	903.554	903.556	3	41.95
IPI00024067	Isoform 1 of Clathrin heavy chain 1	NNLAGAEELFAR		28.01	1	652.834	1303.65	1303.65	2	48.44			IPI00219250	Isoform 1 of Dual specificity tyrosine-phosphorylation-regulated kinase 1A	IQPYYALQHSFFK		37.77	1	821.425	1640.84	1640.84	2	52.53
IPI00024067	Isoform 1 of Clathrin heavy chain 1	SVNESLNNLFITEEDYQALR		99.35	1	1178.08	2354.14	2354.14	2	55.94			IPI00219250	Isoform 1 of Dual specificity tyrosine-phosphorylation-regulated kinase 1A	IQPYYALQHSFFKK		25.08	1	590.651	1768.93	1768.93	3	48.78
IPI00024067	Isoform 1 of Clathrin heavy chain 1	TLQIFNIEMK		71.1	1	618.837	1235.66	1235.66	2	54.91			IPI00219250	Isoform 1 of Dual specificity tyrosine-phosphorylation-regulated kinase 1A	IVEVLGIPPAHILDQAPK		45.74	1	637.376	1909.1	1909.11	3	52.14
IPI00871686	Isoform 1 of CLIP-associating protein 2	AGGDATDSSQTALDNK		96.96	1	775.851	1549.69	1549.69	2	26.1			IPI00219250	Isoform 1 of Dual specificity tyrosine-phosphorylation-regulated kinase 1A	KFFEKLPDGTWNLKK		70.76	1	617.678	1850.01	1850.01	3	43.98
IPI00871686	Isoform 1 of CLIP-associating protein 2	MVSQSQPGSR		41.39	1	538.761	1075.51	1075.51	2	18.98			IPI00219250	Isoform 1 of Dual specificity tyrosine-phosphorylation-regulated kinase 1A	KTADEGTNTSNSVSTSPAMEQSQSSGTTSSTSSSSGGSSGTSNSGR		133.75	1	1458.63	4372.86	4372.87	3	28.39
IPI00394751	Isoform 1 of Constitutive coactivator of PPAR-gamma-like protein 2	AVEYYSVTTK		16.91	1	580.796	1159.58	1159.58	2	33.94			IPI00219250	Isoform 1 of Dual specificity tyrosine-phosphorylation-regulated kinase 1A	KVYNDGYDDDNYDYIVK		106.35	1	1049.97	2097.92	2097.92	2	41.03
IPI00394751	Isoform 1 of Constitutive coactivator of PPAR-gamma-like protein 2	GVQGFQEFLEK		61.76	1	641.329	1280.64	1280.64	2	50.17			IPI00219250	Isoform 1 of Dual specificity tyrosine-phosphorylation-regulated kinase 1A	KVYNDGYDDDNYDYIVKNGEK	Deamidation (NQ)-N18	32.46	1	843.376	2527.1	2527.11	3	38.37
IPI00394751	Isoform 1 of Constitutive coactivator of PPAR-gamma-like protein 2	NLTTNQFLMQEVAK		88.56	1	818.923	1635.83	1635.83	2	48.47			IPI00219250	Isoform 1 of Dual specificity tyrosine-phosphorylation-regulated kinase 1A	LPDGTWNLKK		65.54	1	391.221	1170.64	1170.64	3	38.88
IPI00394751	Isoform 1 of Constitutive coactivator of PPAR-gamma-like protein 2	NQVGTISAGKPMFSHQVPQK		57.09	1	718.709	2153.11	2153.11	3	36.86			IPI00219250	Isoform 1 of Dual specificity tyrosine-phosphorylation-regulated kinase 1A	LSVDLIK		44.32	1	394.25	786.485	786.486	2	43.71
IPI00394751	Isoform 1 of Constitutive coactivator of PPAR-gamma-like protein 2	SLELHQGR		28.42	1	470.254	938.493	938.493	2	27.05			IPI00219250	Isoform 1 of Dual specificity tyrosine-phosphorylation-regulated kinase 1A	MLDYDPK		16.67	1	441.207	880.4	880.4	2	33.48
IPI00100160	Isoform 1 of Cullin-associated NEDD8-dissociated protein 1	EGPAVVGQFIQDVK		47.22	1	743.9	1485.78	1485.79	2	51.32			IPI00219250	Isoform 1 of Dual specificity tyrosine-phosphorylation-regulated kinase 1A	QETGIAGHPTYQFSANTGPAHYMTEGHLTMR		92.85	1	1135.19	3402.55	3402.56	3	45.11
IPI00100160	Isoform 1 of Cullin-associated NEDD8-dissociated protein 1	FMATNDLMTELQK		56.45	1	771.374	1540.73	1540.73	2	50.68			IPI00219250	Isoform 1 of Dual specificity tyrosine-phosphorylation-regulated kinase 1A	QETGIAGHPTYQFSANTGPAHYMTEGHLTMR	Oxidation (M)-M30	20.33	1	855.646	3418.55	3418.55	4	43.23
IPI00654682	Isoform 1 of Cyclin-L1	LSPTPSMQDGLDLPSETDLR		84.43	1	1086.53	2171.04	2171.05	2	48.79			IPI00219250	Isoform 1 of Dual specificity tyrosine-phosphorylation-regulated kinase 1A	QPNISDQQVSALSYSDQIQQPLTNQR		38.85	1	986.824	2957.45	2957.45	3	45.04
IPI00654682	Isoform 1 of Cyclin-L1	RKVALQEAK		58.96	1	348.218	1041.63	1041.63	3	22.11			IPI00219250	Isoform 1 of Dual specificity tyrosine-phosphorylation-regulated kinase 1A	RAGESGHTVADYLK		76.4	1	501.924	1502.75	1502.75	3	36.62
IPI00654682	Isoform 1 of Cyclin-L1	RTPSPLILDQNYINTK		67.08	1	937.018	1872.01	1872.02	2	45.75			IPI00219250	Isoform 1 of Dual specificity tyrosine-phosphorylation-regulated kinase 1A	RQPNISDQQVSALSYSDQIQQPLTNQR		119.43	1	1038.86	3113.55	3113.56	3	43.78
IPI00375652	Isoform 1 of Cytoplasmic polyadenylation element-binding protein 4	FVQLQHGEIDKR		65.5	1	735.398	1468.78	1468.78	2	33.23			IPI00219250	Isoform 1 of Dual specificity tyrosine-phosphorylation-regulated kinase 1A	WMDRYEIDSLIGK		46.01	1	813.404	1624.79	1624.79	2	51.37
IPI00375652	Isoform 1 of Cytoplasmic polyadenylation element-binding protein 4	NFASNHIQLQK		28.84	1	433.899	1298.67	1298.67	3	35.5			IPI00472614	Isoform 1 of ERC protein 2	AAILQTEVDALR		82.72	1	650.367	1298.72	1298.72	2	47.88
IPI00375652	Isoform 1 of Cytoplasmic polyadenylation element-binding protein 4	SQQQEQQDPLEK		59.89	1	729.354	1456.68	1456.69	2	28.17			IPI00472614	Isoform 1 of ERC protein 2	DSTMLDLQAQLK		60.45	1	681.852	1361.69	1361.69	2	47.42
IPI00031519	Isoform 1 of DNA (cytosine-5)-methyltransferase 1	AGVQADEDEDGDEKDEK		41.25	1	617.257	1848.75	1848.75	3	23.02			IPI00472614	Isoform 1 of ERC protein 2	ESFLNKK		15.16	1	433.243	864.47	864.471	2	28.94
IPI00031519	Isoform 1 of DNA (cytosine-5)-methyltransferase 1	NLGPINEWWITGFDGGEK		37.73	1	1016.99	2031.97	2031.97	2	61.24			IPI00472614	Isoform 1 of ERC protein 2	LASTQQSLAEKEAHLANLR		52.13	1	694.043	2079.11	2079.11	3	40.67
IPI00329216	Isoform 1 of DNA (cytosine-5)-methyltransferase 3A	GGAPAEGEGAAETLPEASR		32.68	1	885.417	1768.82	1768.82	2	33.45			IPI00472614	Isoform 1 of ERC protein 2	LLEILKEVENEKNDKDKK	Deamidation (NQ)-N13	33.32	1	547.308	2185.18	2185.2	4	45.51
IPI00329216	Isoform 1 of DNA (cytosine-5)-methyltransferase 3A	WVMWFGDGK		34.24	1	563.263	1124.51	1124.51	2	56.76			IPI00472614	Isoform 1 of ERC protein 2	LVHQLK		37.25	1	369.238	736.46	736.461	2	23.49
IPI00478232	Isoform 1 of DNA topoisomerase 2-alpha	EKQDEQVGLPGK		55.85	1	664.345	1326.68	1326.68	2	29.85			IPI00472614	Isoform 1 of ERC protein 2	NIRDLEDEIQMLK		53.32	1	808.92	1615.82	1615.83	2	53.67
IPI00478232	Isoform 1 of DNA topoisomerase 2-alpha	HVDYVADQIVTK		45.3	1	694.364	1386.71	1386.71	2	36.29			IPI00472614	Isoform 1 of ERC protein 2	SLQTDSSNTDTALATLEEALSEK		27.24	1	808.727	2423.16	2423.16	3	60.26
IPI00478232	Isoform 1 of DNA topoisomerase 2-alpha	LHGGKDSASPR		26.19	1	375.533	1123.57	1123.58	3	12.18			IPI00472614	Isoform 1 of ERC protein 2	SLQTDSSNTDTALATLEEALSEKER		66.45	1	903.775	2708.3	2708.3	3	56.67
IPI00478232	Isoform 1 of DNA topoisomerase 2-alpha	LRNEKEQELDTLKR		18.08	1	591.327	1770.96	1770.96	3	30.41			IPI00472614	Isoform 1 of ERC protein 2	TRQELDATK		26.72	1	531.283	1060.55	1060.55	2	20.56
IPI00478232	Isoform 1 of DNA topoisomerase 2-alpha	MQSLDKDIVALMVR		21.42	1	540.293	1617.86	1617.86	3	56.97			IPI00472614	Isoform 1 of ERC protein 2	VLRKEEAAR		45.8	1	536.317	1070.62	1070.62	2	15.62
IPI00478232	Isoform 1 of DNA topoisomerase 2-alpha	VIHEQVNHR		16.05	1	377.872	1130.59	1130.59	3	18.43			IPI00022744	Isoform 1 of Exportin-2	AADEEAFEDNSEEYIRR	Deamidation (NQ)-N10	60.07	1	682.301	2043.87	2043.88	3	39.72
IPI00478232	Isoform 1 of DNA topoisomerase 2-alpha	VTIDPENNLISIWNNGK		93.5	1	964.002	1925.98	1925.99	2	56.51			IPI00022744	Isoform 1 of Exportin-2	DLEGSDIDTR		39.91	1	560.76	1119.5	1119.5	2	30.72
IPI00478232	Isoform 1 of DNA topoisomerase 2-alpha	YIFTMLSSLAR		51.13	1	651.351	1300.68	1300.69	2	60.05			IPI00022744	Isoform 1 of Exportin-2	EHDPVGQMVNNPK		50.14	1	732.849	1463.68	1463.68	2	32.25
IPI00296337	Isoform 1 of DNA-dependent protein kinase catalytic subunit	AQEPESGLSEETQVK		71.14	1	816.395	1630.77	1630.78	2	32.53			IPI00640703	Isoform 1 of Exportin-5	AVTVMMDPNSTQR		51.03	1	725.348	1448.68	1448.68	2	37.16
IPI00296337	Isoform 1 of DNA-dependent protein kinase catalytic subunit	ATQMPEGGQGAPPMYQLYK		88.11	1	1033.99	2065.96	2065.97	2	44.91			IPI00640703	Isoform 1 of Exportin-5	IFSFLLNTLQENVNK		68.94	1	890.488	1778.96	1778.96	2	61.37
IPI00296337	Isoform 1 of DNA-dependent protein kinase catalytic subunit	ATQQQHDFTLTQTADGR		89.66	1	959.457	1916.9	1916.9	2	35.37			IPI00640703	Isoform 1 of Exportin-5	SSTQMTWGALFR		65.3	1	692.839	1383.66	1383.66	2	56.04
IPI00296337	Isoform 1 of DNA-dependent protein kinase catalytic subunit	EQQHVMEELFQSSFR		69.73	1	947.944	1893.87	1893.87	2	52.8			IPI00640703	Isoform 1 of Exportin-5	VLSDVDAFIAYVGTDQK		59.39	1	920.972	1839.93	1839.93	2	56.72
IPI00296337	Isoform 1 of DNA-dependent protein kinase catalytic subunit	GANRTETVTSFR		48.3	1	669.841	1337.67	1337.67	2	31.94			IPI00022143	Isoform 1 of Extended synaptotagmin-1	FFLQDPQSQELDVQVK	Deamidation (NQ)-Q7	41.38	1	961.478	1920.95	1920.94	2	49.85
IPI00296337	Isoform 1 of DNA-dependent protein kinase catalytic subunit	GPESESEDHR		53.26	1	571.739	1141.46	1141.46	2	14.88			IPI00022143	Isoform 1 of Extended synaptotagmin-1	QLLDDEEQLTAK		15.26	1	701.86	1401.7	1401.71	2	39.83
IPI00296337	Isoform 1 of DNA-dependent protein kinase catalytic subunit	GPESESEDHRASGEVR		46.17	1	581.263	1740.77	1740.77	3	22.02			IPI00022143	Isoform 1 of Extended synaptotagmin-1	SHVVREDLNPR		61.81	1	441.236	1320.69	1320.69	3	27.55
IPI00296337	Isoform 1 of DNA-dependent protein kinase catalytic subunit	IMEFTTTLLNTSPEGWK		75.38	1	984.496	1966.97	1966.98	2	57			IPI00022143	Isoform 1 of Extended synaptotagmin-1	VQLDLAETDLSQGVAR		136.01	1	857.952	1713.89	1713.89	2	46.84
IPI00296337	Isoform 1 of DNA-dependent protein kinase catalytic subunit	LGASLAFNNIYR		54.3	1	669.862	1337.71	1337.71	2	48.35			IPI00075081	Isoform 1 of Fanconi anemia group D2 protein	DGGPVTSQESGQK		47.19	1	645.303	1288.59	1288.59	2	21.1
IPI00296337	Isoform 1 of DNA-dependent protein kinase catalytic subunit	LLLQGEADQSLLTFIDK		37.74	1	952.525	1903.03	1903.03	2	60.72			IPI00075081	Isoform 1 of Fanconi anemia group D2 protein	LQDEEASMGASYSK		25.12	1	758.336	1514.66	1514.66	2	31.69
IPI00296337	Isoform 1 of DNA-dependent protein kinase catalytic subunit	LLNTWTNRYPDAK		24.55	1	796.415	1590.82	1590.82	2	40.13			IPI00075081	Isoform 1 of Fanconi anemia group D2 protein	SEDKESLTEDASK		50	1	719.832	1437.65	1437.65	2	25.91
IPI00296337	Isoform 1 of DNA-dependent protein kinase catalytic subunit	LPKDDVHAK		54.61	1	511.785	1021.56	1021.55	2	21.54			IPI00075081	Isoform 1 of Fanconi anemia group D2 protein	SESPSLTQER		21.19	1	567.278	1132.54	1132.54	2	28.03
IPI00296337	Isoform 1 of DNA-dependent protein kinase catalytic subunit	LSDFNDITNMLLLK		79.01	1	818.936	1635.85	1635.86	2	62.26			IPI00075081	Isoform 1 of Fanconi anemia group D2 protein	TGESQNQLAVDQIAFQK	Deamidation (NQ)-Q5|Deamidation (NQ)-N6|Deamidation (NQ)-Q16	22.36	1	940.444	1878.88	1878.87	2	53.67
[truncated: 2,659 more rows]

## Sheet: BlmosterMCP
N:o	UniProt ID	protein description	ref.	prot score	prot mass	measured m/z	charge	neutral mass	theoretical mass	delta mass	pep score	pep expect	pep seq	pep var mod
[truncated: 4,154 more rows]

[truncated: 9 more sheets: All_NR, ID_common, HGNC, NR, GSEblomster, GSEgalisson, GSEMatic, GSEphosphosite, GSEall]
