# Supplementary material for: Strategies to Identify Recognition Signals and Targets of SUMOylation
Source: Biochem Res Int. 2012 Jul 1;2012:875148. doi: 10.1155/2012/875148 (PMC3395311; doi:10.1155/2012/875148)
Supplement: Supplementary file 5 [file 875148.f5.xls]

## Sheet: Sheet1
Supplementary table 2. Overlapping of datasets of putative and real sumoylated proteins used in this work.
All pairvise comparisons						Overlap
blomsterMCP.txt	vs	Gallison.txt	307	71	346	9.80663
blomsterMCP.txt	vs	matic.txt	365	13	59	2.97483
blomsterMCP.txt	vs	phosphosite.txt	350	28	278	4.26829
Gallison.txt	vs	matic.txt	389	28	44	6.07375
Gallison.txt	vs	phosphosite.txt	367	50	256	7.42942
matic.txt	vs	phosphosite.txt	8	64	242	20.3822
