# Supplementary material for: Strategies to Identify Recognition Signals and Targets of SUMOylation
Source: Biochem Res Int. 2012 Jul 1;2012:875148. doi: 10.1155/2012/875148 (PMC3395311; doi:10.1155/2012/875148)
Supplement: Supplementary file 6 [file 875148.f6.xls]

## Sheet: Matic
Supplementary table 3. Databases of sumoylated peptides used in this work.
Protein	Peptide
ACIN1	AQPLPLKIEELAL
ACTB	EAPLNPKANREKM
ADAR	GQEPVIKLENRQE
AHNAK	FSMPGFKAEGPEV
ANX5	TLRKAMKGLGTDE
APC4	NKPVKIKEEVLSE
APC4	APEIVIKVEKLDP
ARID4B	VKEIKVKEENETE
BCLAF1	TFQKRPKEEEWDP
BRD4	QPLVVVKEEKIHS
CANX	APQPDVKEEEEEK
CCAR1	LPTPTVKQESKDV
CD3EAP	PEDKTVKQEQINT
ERBB2IP	TIVHRLKDEETNE
FLNA	PTGNMVKKRAEFT
FNBP4	RRKVICKEEPVSE
FOSL2	VGAVVVKQEPLEE
GEMIN5	TLRTPVKLESIDG
GRL	CTPGVIKQEKLGT
GRL	VTLPQVKTEKEDF
GTF2I	DGSSQIKQEPDPT
HNRNPC	VEMKNDKSEEEQS
HNRNPM	KGCGVVKFESPEV
HNRNPM	VAATEIKMEEESG
HNRNPUL1	YDTQVIKQENESG
IFI16	TLKPRLKTEPEEV
KDM2B	KPLRRFKQEPEDE
KHDRBS1	KMEPENKYLPELM
KRT5	IKTLNNKFASFID
LMNA	EIHAYRKLLEGEE
MAP4	KKPTAIKTEGKPA
MKI67	VQKVQVKEEPSAV
MYO1B	LGNIEFKPESRVN
NAB1	LEKKVIKTEPEDS
NOL5	KAKIKVKVEEEEE
NOL5	GKKKHIKEEPLSE
NOLA2	__MTKIKADPDGP
NP60	ITPTDKKIGFLGL
NSBP1	KEIVEVKEENIED
NUMA1	SQRLPPKVESLES
PARP1	PWGAEVKAEPVEV
PBRM1	EIYYFRKPIVPQK
PML	CPRKVIKMESEEG
PNN	VRNEEQKAEQEEG
PSMD12	NIMLLSKRRSQLK
PTRF	IYQDEVKLPAKLS
RANBP2	EQSSDSKVKNLFA
RANBP2	SSDSKVKNLFASF
RANBP2	QSGSESKVEPKKC
RANGAP1	VHMGLLKSEDKVK
RBM12B	RKTRPLKAENPYL
RBM25	RRQPQIKQEPESE
RLF	DIKKSVKLEESAT
RLF	KYGTKIKEEPPSE
RREB1	SMEAKIKQEITEG
RSF1	LEETTVKKEKEDE
RSF1	KESEKMKSEEQPM
RSF1	KLPVIVKLEKPLP
RSF1	EEKKIIKEESDSF
RSF1	FLKDEIKQEEETC
RSF1	RVAPNFKTEPIET
SAE2	HSEDLGKDVEFEV
SAFB2	CKSEPVKEESSEL
SAFB2	ILGETCKSEPVKE
SAFB2	HHSVEIKIEKTVI
SAFB2	KEEKDIKPIIKDE
SAFB2	SLLAVVKREPAEQ
SAP18	VTQEEIKKEPEKP
SART1	LEVNAIKKEAGTK
SEC22B	EAAFPKKLAFAYL
SF3B1	MFPEGYKVLPPPA
SLK	FENKLIKSEEIKD
SNIP-1	PAGVVVKQERLSP
SNRPD2	SLLNKPKSEMTPE
STAT1	KGTGYIKTELISV
SUMO1	MSDQEAKPSTEDL
SUMO2	KPKEGVKTENNDH
SYMPK	STLKKMKLEPNLG
TCOF1	PTVTQVKAEKQED
THOC1	APYLEMKDSEIRQ
TOP1	SSPPQIKDEPEDD
TOP2	KNKKKIKNENTEG
TOP2	RITIEMKAEAEKK
TRIM24	LEPIRIKQENSGP
TRIM28; TIF1B	NKLTEDKADVQSI
TRIM28; TIF1B	RARLQEKLSPPYS
TRIM28; TIF1B	EAFGDTKFSAVLV
TRIM33	SDQVKVKQEPGTE
VASP	VGEKTPKDESANQ
YLPM1	RGPGLVKQEDFRD
ZBTB1	RKRIIIKMEPEDI
ZBTB2	PVLASIKKEQETV
ZBTB38	IIVEDTKFKAHSN
ZBTB9	PKIFYIKQEPFEP
ZMYM1	GLLDEIKTEPDNA
ZMYM4	ASNIRIKEEPLDD
ZMYM4	GLLDKIKDEPDNA
ZMYND8	TNPVEIKEELKST
ZNF280C	SSSKGIKSEPHSP
ZNF280C	FLGVIVKSERPCD
ZNF295	LIVGDQKFRAHKN
ZNF451	KTETSIKTEDDFP
ZNF800	SSEIKVKVEPADS

## Sheet: BlomsterJBC
Protein	Peptide	peptide
RAGP1_HUMAN	LLVHMGLL(GG-)KSEDK	VHMGLLKSEDKVK
RAGP1_HUMAN	ASEDIA(GG-)KLAETLAK	ASEDIAKLAETLA
TIF1B_HUMAN	LTED(GG-)KADVQSIIGLQR	NKLTEDKADVQSI
SUMO1_HUMAN	SDQEA(GG-)KPSTEDLGDKK	_SDQEAKPSTEDL
SUMO1_HUMAN	L(GG-)KVIGQDSSEIHFK	GEYIKLKVIGQDS
SUMO2_HUMAN	EGV(GG-)KTENNDHINLK	KPKEGVKTENNDH
IF16_HUMAN	L(GG-)KTEPEEVSIEDSAQSDLK	TLKPRLKTEPEEV
RBM16_HUMAN	pTFNSELYSLNDY(GG-)KPPISKAK	YSLNDYKPPISKA
IF172_HUMAN	MHL(GG-)KHLR	___MHLKHLRTLL
FMO2_HUMAN	NAIFTQ(GG-)KQRILKPLK	NAIFTQKQRILKP
FYTD1_HUMAN	R(GG-)KANLLR	FPVLKRKANLLRQ
HSFX1_HUMAN	RVGV(GG-)KSAPR	KRRVGVKSAPRHQ
MRC2_HUMAN	LLQ(GG-)KPLR	TFRLLQKPLRWHD
CKP2L_HUMAN	(GG-)KPDPKLpYTR	LTEPERKPDPKLY

## Sheet: GallisonMCP
Protein	Peptide	peptide
Histone 3.1	Lys-24	RKQLATKAARKSA
Histone 4	Lys-14	GGKGLGKGGAKRH
HSF4B	Lys-288	SDGRREKGLALLK
Lamin A/C	Lys-420	SVTKKRKLESTES
PML	Lys-380	DGFDEFKVRLQDL
PML	Lys-400	KDAAVSKKASPEA
PML	Lys-490	CPRKVIKMESEEG
PML	Lys-497	MESEEGKEARLAR
RSF1	Lys-287	DEKELVKLPVIVK
SAFB2	Lys-524	IEKTVIKKEEKIE
TIF-1	Lys-750	RARLQEKLSPPYS
TIF-1	Lys-779	NKLTEDKADVQSI
WIZ1	Lys-1523	SPPGTVKAEEHQR
Ubiquitin	Lys-11	VKTLTGKTITLEV
SUMO2	Lys-11	KPKEGVKTENNDH
SUMO2	Lys-42	RHTPLSKLMKAYC
SUMO3	Lys-11	KPKEGVKTENDHI
SUMO3	Lys-41	RHTPLSKLMKAYC
SUMO4	Lys-11	KPTEEVKTENNNH

## Sheet: Hsiao
Protein	Peptide	peptide	SUMO
P46060	Lys524	VHMGLLKSEDKVK	1
P63165	Lys17	EDLGDKKEGEYIK	1
P61956	Lys11	KPKEGVKTENNDH	1
P63279	Lys146	NRVEYEKRVRAQA	1
P49792	Lys1414	FALVTPKKEGHWD	1
P49792	Lys1723	FEGMFTKKEGQWD	1
P49792	Lys2255	ASSPVRKNLFRFG	1
P49792	Lys2433	DVADSFKKIFDEA	1
P49792	Lys2513	AVVSPPKFVFGSE	1
P49792	Lys2592	EQSSDSKVKNLFA	1
P49792	Lys2618	KTPEKAKEKKKPE	1
Q7Z3J3	Lys691	ALIFHRKAEDIAN	1
Q9HCK8	Lys592	TEDLDIKITDDEE	1
Q14204	Lys3207	LNVGLRKIKETVD	1
P49748	Lys635	ELYRNFKSISKAL	1
P07814	Lys318	RKNPIEKNLQMWE	1
P61956	Lys11	KPKEGVKTENNDH	2
