# Supplementary material for: Strategies to Identify Recognition Signals and Targets of SUMOylation
Source: Biochem Res Int. 2012 Jul 1;2012:875148. doi: 10.1155/2012/875148 (PMC3395311; doi:10.1155/2012/875148)
Supplement: Supplementary file 7 [file 875148.f7.xls]

## Sheet: Sheet0
Supplementary table 4. Molecular functions of putative and real sumoylated proteins found using IPA.
© 2000-2012 Ingenuity Systems, Inc. All rights reserved.
Category	Functions	Functions Annotation	p-Value	Molecules	# Molecules
Gene Expression	transcription	transcription	3,56E-49	APP,AR,ARID2,ARID3A,ARNTL,ATXN1,ATXN7,AXIN1,BACH2,BAZ1B,BRCA1,CBX4,CCNT2,CD3EAP,CDK2,CDX2,CEBPB (includes EG:1051),CEBPD,CEBPE,CHD8,CREB1,CREB5,CTBP1,CTCF (includes EG:10664),DAXX,DDB1,DDX5,DHX9,DLX2,DNMT1,DNMT3A,DYRK1A,EIF2AK2,EIF2S1,ELF4,ELK1,ELK3,EP300,EPAS1,ESR1,ESRRG,ETS1,ETV4,ETV5,ETV6,FLI1,FOS,FOSL2,FOXF2,FOXL2,FUBP1,GATA1,GATA6,GSK3B,GTF2I,HAND1,HBZ,HDAC1,HDAC4,HIC1,HIF1A,HIPK2,HIST1H1B,H…	205
Gene Expression	transcription	transcription of RNA	6,81E-49	APP,AR,ARID2,ARID3A,ARNTL,ATXN1,ATXN7,AXIN1,BACH2,BAZ1B,BRCA1,CBX4,CCNT2,CD3EAP,CDK2,CDX2,CEBPB (includes EG:1051),CEBPD,CEBPE,CHD8,CREB1,CREB5,CTBP1,CTCF (includes EG:10664),DAXX,DDB1,DDX5,DLX2,DNMT1,DNMT3A,DYRK1A,EIF2AK2,EIF2S1,ELF4,ELK1,ELK3,EP300,EPAS1,ESR1,ESRRG,ETS1,ETV4,ETV5,ETV6,FLI1,FOS,FOSL2,FOXF2,FOXL2,FUBP1,GATA1,GATA6,GSK3B,GTF2I,HAND1,HBZ,HDAC1,HDAC4,HIC1,HIF1A,HIPK2,HIST1H1B,HMGN5,…	204
Gene Expression	expression	expression of RNA	2,40E-45	APP,AR,ARID2,ARID3A,ARNTL,ATXN1,ATXN7,AXIN1,BACH2,BAZ1B,BRCA1,CBX4,CCNT2,CD3EAP,CDK2,CDX2,CEBPB (includes EG:1051),CEBPD,CEBPE,CHD8,CREB1,CREB5,CTBP1,CTCF (includes EG:10664),DAXX,DDB1,DDX5,DLX2,DNMT1,DNMT3A,DYRK1A,EIF2AK2,EIF2S1,ELF4,ELK1,ELK3,EP300,EPAS1,ESR1,ESRRG,ETS1,ETV4,ETV5,ETV6,FLI1,FOS,FOSL2,FOXF2,FOXL2,FUBP1,GATA1,GATA6,GNB2L1,GSK3B,GTF2I,HAND1,HBZ,HDAC1,HDAC4,HIC1,HIF1A,HIPK2,HIST1H1B…	210
Gene Expression	transcription	transcription of DNA	6,55E-38	APP,AR,ARID2,ARID3A,ARNTL,ATXN1,ATXN7,AXIN1,BACH2,BAZ1B,CBX4,CD3EAP,CDK2,CDX2,CEBPB (includes EG:1051),CEBPD,CHD8,CREB1,CREB5,CTBP1,CTCF (includes EG:10664),DAXX,DDX5,DLX2,DNMT1,DNMT3A,ELF4,ELK1,ELK3,EP300,EPAS1,ESR1,ESRRG,ETS1,ETV4,ETV5,ETV6,FLI1,FOS,FOXF2,FOXL2,GATA1,GATA6,HAND1,HBZ,HDAC1,HDAC4,HIF1A,HIPK2,HMGN5,HSF4,IRF1 (includes EG:16362),JUN,KAT5,KHDRBS1,MAF,MAFA,MAFB,MAML1,MEF2A,MEF2C,MEF2…	156
Gene Expression	transactivation	transactivation	3,71E-30	APP,AR,BRCA1,CEBPB (includes EG:1051),CEBPD,CREB1,EIF2AK2,ELK1,ENO1,EP300,EPAS1,ESR1,ESRRG,ETS1,ETV4,ETV6,FOS,FOSL2,FUS,GATA1,GTF2I,HDAC1,HIF1A,HNRNPA1,HNRNPK,IGF2BP1,ILF3,IRF1 (includes EG:16362),JUN,KHDRBS1,LEMD3,MAF,MAFB,MAPKAPK2,MAZ,MCM5,MDM2,MDM4,MEF2C,MYB,NAB1,NCOA1,NCOA2,NCOA3,NFE2,NR1H2,NR1H3,NR3C1,NR4A2,NR5A1,NR5A2,NRIP1,NRL,PA2G4,PARP1,PGR (includes EG:18667),PML,PPARA,PPARG,PRKDC,PTPN1…	80
Gene Expression	activation	activation of DNA endogenous promoter	4,28E-27	APP,AR,ARID2,ARNTL,ATXN1,ATXN7,CBX4,CDX2,CEBPB (includes EG:1051),CEBPD,CREB1,CREB5,CTBP1,DLX2,DNMT3A,ELF4,ELK1,EP300,EPAS1,ESR1,ETS1,FOS,FOXF2,FOXL2,GATA1,GATA6,HAND1,HBZ,HDAC1,HDAC4,HIF1A,HIPK2,HMGN5,HSF4,IRF1 (includes EG:16362),JUN,KAT5,MAF,MAFA,MAFB,MAML1,MEF2C,MEF2D,MKL1,MTA2,MYOCD,NCOA1,NCOA2,NFATC1,NR1H2,NR1H3,NR4A2,NR5A1,NR5A2,NRIP1,NRL,ONECUT2,OTX1,PCNA,PFN1,PHIP,PIAS4,PLAGL2,POU3F2,POU…	109
Cell Death	cell death	cell death	2,89E-21	AARS,ACIN1,ACTB,ACTC1,ADAR,ADH5 (includes EG:11532),ALB,ALDH1A2,ALDOA,AMOT,ANXA2,ANXA5,APEX1,APP,AR,ARG1,ATF7,ATP2B4,ATXN1,ATXN2,AXIN1,BACH2,BAX,BCAP31,BLM,BRCA1,BRD4,CASP2,CCT2,CCT3,CCT4,CCT5,CCT6A,CCT7,CCT8,CDK2,CEBPB (includes EG:1051),CEBPD,CENPC1,CFLAR,CHD8,CLCN7,CREB1,CSE1L,CTBP1,CTCF (includes EG:10664),CYCS,DAPK3,DAXX,DDX3X,DDX5,DHX9,DLX2,DNMT1,DNMT3A,DSP,EEF1D,EEF2,EIF2AK2,EIF2S1,EIF5B,E…	233
Cell Death	apoptosis	apoptosis	2,20E-18	AARS,ACIN1,ACTC1,ADAR,ADH5 (includes EG:11532),ALDH1A2,ALDOA,AMOT,ANXA2,ANXA5,APP,AR,ARG1,ATF7,ATP2B4,ATXN1,ATXN2,AXIN1,BACH2,BAX,BCAP31,BLM,BRCA1,CASP2,CDK2,CEBPB (includes EG:1051),CEBPD,CENPC1,CFLAR,CHD8,CREB1,CTBP1,CTCF (includes EG:10664),CYCS,DAPK3,DAXX,DDX3X,DDX5,DLX2,DNMT1,DNMT3A,DSP,EEF1D,EIF2AK2,EIF2S1,ELK1,EMD,EP300,EPHX1,ESR1,ETS1,ETV6,FASN,FBL,FEN1,FLI1,FOS,FOXF2,FOXL2,FUS,G6PD,GAPDH…	186
Gene Expression	repression	repression of RNA	2,00E-17	CREB1,CTBP1,DAXX,ELK1,ETV6,FLI1,FOXG1,HAND1,HDAC1,HDAC4,HNRNPK,HTT,JUN,KAT5,KLF3,MBD1,NCOA2,NR3C1,NRIP1,PGR (includes EG:18667),PML,RARA,RB1,RCOR1,SAFB,SALL1,SAP18,SIRT1,SKIL,STAT5A,TP53 (includes EG:22059),TSC22D1,UBTF,WT1,YY1,ZBTB16	36
Cellular Development	differentiation	differentiation of cells	1,12E-15	ACADM,ALDH1A2,ANXA1,AP3D1,APP,AR,ARID5B,ATXN2,AXIN1,BACH2,BAX,BLM,BRCA1,CCNT2,CDK2,CDX2,CEBPB (includes EG:1051),CEBPD,CEBPE,CREB1,CREB5,CTBP1,DHCR7,DLX2,DNMT1,DSC1,DYRK1A,EIF2AK2,ELF4,ELK1,EPAS1,ESR1,ESRRG,ETS1,ETV4,ETV6,FLI1,FLNC,FOS,FOSL2,FOXF2,FOXG1,FOXJ3,FOXL2,GATA1,GATA6,GCM1,GSK3B,HAND1,HDAC1,HDAC4,HIF1A,HNRNPA2B1,HOXA9,HSF4,HSP90AA1,HSP90B1,HSPD1,HTT,IGF1R,IRF1 (includes EG:16362),IRF2,JU…	157
Cellular Development	differentiation	differentiation	2,26E-15	ACADM,AHSA1,ALDH1A2,ANXA1,AP3D1,APP,AR,ARID5B,ATXN2,AXIN1,BACH2,BAX,BLM,BRCA1,CCNT2,CDK2,CDX2,CEBPB (includes EG:1051),CEBPD,CEBPE,CREB1,CREB5,CTBP1,DHCR7,DLX2,DNMT1,DSC1,DYRK1A,EIF2AK2,ELF4,ELK1,EPAS1,ESR1,ESRRG,ETS1,ETV4,ETV6,FLI1,FLNC,FOS,FOSL2,FOXF2,FOXG1,FOXJ3,FOXL2,GATA1,GATA6,GCM1,GSK3B,HAND1,HDAC1,HDAC4,HIF1A,HIST1H1B,HNRNPA2B1,HOXA9,HSF4,HSP90AA1,HSP90B1,HSPD1,HTT,IGF1R,IRF1 (includes EG…	164
Organismal Survival	organismal death	organismal death	2,85E-15	ACLY,ACTC1,ADAR,ADH5 (includes EG:11532),ALDH1A2,ANXA1,APP,ARG1,ATF7,BAX,BLM,BRCA1,BRD4,CAPZB,CBS,CDK2,CDX2,CEBPB (includes EG:1051),CEBPD,CFLAR,CREB1,DDX17,DDX5,DNMT3A,DSP,DYRK1A,EP300,EPAS1,ESR1,ETS1,ETV6,FANCD2,FASN,FBL,FERMT3,FLI1,FLNC,GATA1,GATA6,GSK3B,HADHA,HDAC1,HIF1A,HIPK2,HIST1H1C,HIST1H1D,HK2,HNRNPC,HSP90AB1,HTT,IGF1R,IKBKE,IKBKG,IRF2,KRT8,LEMD3,MAF,MAFG,MAP3K1,MDM2,MDM4,MEF2A,MEF2C,MSH…	122
Gene Expression	binding	binding of DNA	1,98E-13	APEX1,APP,AR,BRCA1,CEBPB (includes EG:1051),CREB1,EP300,ESR1,ETV6,FLI1,FOS,FOSL2,GATA1,GSK3B,HDAC1,HIPK2,HOXA9,HTT,IRF1 (includes EG:16362),JUN,KRT6A,LMNA,MAP3K1,MDM2,MYB,NCOA2,NFKB2,NFKBIA,NPM1,NR1H3,NR3C1,NR5A1,PARP1,PCNA,PML,PPARA,PPARG,PPIA,PPP1CC,PRKDC,RB1,RXRA,SART3,SFPQ,SMAD4,SND1,SP1,SREBF1,SRF,STAT1,TP53 (includes EG:22059),TP63,TP73,XPC,XRCC5,YY1	56
Cell Cycle	cell cycle progression	cell cycle progression	2,30E-12	AHCY,ANXA1,APP,ARID1B,ARID3A,BAX,BRCA1,BRD4,CDK2,CEBPB (includes EG:1051),CENPC1,CREB1,EIF2AK2,ELF4,EP300,ETS1,FANCD2,FOS,FOXG1,GPI,GSK3B,HIF1A,HIPK2,HSPA8,IGF1R,IRF1 (includes EG:16362),JUN,KDM2B,KRT10,LMNA,MAP4,MDM2,MDM4,MKI67,MSH2,NCOA3,NFKBIA,NPM1,NR3C1,NR4A2,PGR (includes EG:18667),PLAG1,PLAGL2,PLRG1,PML,PPARA,PPARG,PRKDC,PRMT1,PROX1,RAN,RARA,RB1,RNF2,RPS6,SAFB,SIRT1,SKIL,SMC3,SRF,SSRP1,STAT…	76
Cell Death	cell death	cell death of connective tissue cells	4,62E-12	ACTB,APP,AR,AXIN1,BACH2,BAX,BRCA1,CASP2,CEBPB (includes EG:1051),CFLAR,CREB1,CTBP1,CYCS,DAXX,DDX3X,DNMT1,EIF2AK2,EIF5B,ELK1,EMD,ENO1,EP300,EPHX1,ESR1,ETS1,FLI1,FUS,GPI,GSK3B,HIF1A,HSF1 (includes EG:15499),HSPA5,IGF1R,IKBKG,IRF1 (includes EG:16362),JUN,KHDRBS1,KRT8,MAP3K1,MAP4,MDM2,MDM4,MKL1,MSH2,NFKB2,NR1H2,NR1H3,NR3C1,PARK7,PARP1,PLAGL2,PLRG1,PML,PRKDC,PTPN1,RARA,RB1,SENP1,SGPL1,SIRT1,SLK,STAT1,…	69
Cell Death	cell death	cell death of neuroblastoma cell lines	1,30E-11	APP,ATXN1,CCT2,CCT3,CCT4,CCT5,CCT6A,CCT7,CCT8,HSPA8,HTT,MEF2D,PARK7,PLAGL2,PPARG,SNCA,TCP1	17
DNA Replication, Recombination, and Repair	conformational modification	conformational modification of DNA	1,33E-11	BLM,FOS,GATA1,JUN,MCM2,MCM4,MCM6,MYB,SRF,TOP1,TOP2A,UBTF,XPC,YY1	14
Cellular Growth and Proliferation	proliferation	proliferation of cells	3,88E-11	ALDH1A2,ANXA1,ANXA2,APP,AR,ARG1,ARID3A,ARID5B,ARNTL,ATIC,AXIN1,BACH2,BAX,BLM,BOP1/LOC727967,BRCA1,BRD4,CBLL1,CDK2,CEBPB (includes EG:1051),CEBPD,CFLAR,CLTC,CREB1,DDX3X,DHCR7,DNMT1,DYRK1A,EBNA1BP2,EIF2AK2,ELF4,EP300,ESR1,ETS1,ETV6,FASN,FBRS,FLI1,FOS,FOSL2,FOXF2,FOXG1,FUS,G6PD,GATA1,GATA6,GPI,GSK3B,HDAC1,HDAC4,HDGF,HIF1A,HIPK2,HOXA9,HSF1 (includes EG:15499),HSF4,HSP90B1,HTT,IGF1R,IGF2BP1,IMPDH2,IRF…	165
Cell Death	survival	cell survival	2,97E-10	APEX1,APP,BAX,BCAP31,BLM,BRCA1,BRD4,CEBPB (includes EG:1051),CEBPD,CFLAR,CREB1,CSE1L,DHX9,DNMT1,EEF2,EIF2S1,ELK1,ESR1,ETV6,FANCD2,FLI1,FOS,FOXG1,GATA1,GSK3B,HBZ,HDGF,HIF1A,HSP90AB1,HTT,IGF1R,IKBKG,JUN,JUP,LMNA,MAP3K1,MDM2,MSH2,MYB,NFE2,NFKBIA,NR4A2,PARK7,PARP1,PCNA,PDIA3,PGR (includes EG:18667),PLRG1,POU5F1,PPARG,PRKDC,RAD52 (includes EG:19365),RB1,SIRT1,SLC1A2,SNCA,SOD1,SOX10,STAT1,STAT3,STAT5A,…	78
Cell Death	apoptosis	apoptosis of connective tissue cells	5,01E-10	APP,AR,BAX,CASP2,CEBPB (includes EG:1051),CFLAR,CREB1,CTBP1,CYCS,DAXX,EIF2AK2,ELK1,EMD,EP300,ESR1,GSK3B,IGF1R,JUN,KHDRBS1,MAP3K1,MAP4,MDM2,MDM4,MSH2,PARP1,PLRG1,PRKDC,PTPN1,RB1,SENP1,SGPL1,SIRT1,SLK,TP53 (includes EG:22059),TP73,TRPS1	36
Cell Death	cell death	cell death of fibroblasts	9,83E-10	APP,BAX,CASP2,CFLAR,CTBP1,CYCS,DAXX,EIF2AK2,EMD,EP300,EPHX1,GSK3B,HSF1 (includes EG:15499),IKBKG,JUN,KHDRBS1,MAP3K1,MAP4,MDM2,MDM4,MSH2,PARP1,PLRG1,PML,PRKDC,PTPN1,RARA,RB1,SENP1,SGPL1,SIRT1,SLK,TP53 (includes EG:22059),TP73,UBE2K	35
Cancer	tumorigenesis	tumorigenesis	1,02E-09	ACTB,ALB,ALDH1A2,ALDOA,ALDOC,ANXA1,ANXA2,ANXA5,AR,ARID3A,ATP2A2,AXIN1,BAX,BLM,BRCA1,CASP2,CDK2,CEBPB (includes EG:1051),CFLAR,CREB1,CSE1L,DNMT1,DSC1,DSP,EIF2AK2,ENO1,EP300,EPAS1,EPHX1,ESR1,ETS1,ETV4,ETV6,FANCD2,FEN1,FOS,G6PD,GATA1,GPI,GSK3B,HDAC1,HDAC4,HIF1A,HNRNPD,HNRNPK,HOXA9,HSPA4,HSPA5,HSPA8,IGF1R,IGF2BP1,IKBKG,IMPDH2,IRF1 (includes EG:16362),JUN,JUP,KLF3,KRT10,KRT13,KRT14,KRT17,LDHA,MAML1,MD…	125
Cell Death	cell death	cell death of embryonic cells	1,15E-09	ALDH1A2,BCAP31,BLM,CREB1,DHX9,DNMT3A,ETS1,ETV6,GATA6,HIF1A,HTT,MAP3K1,MSH2,PRPF19,RB1,SALL1,SMARCA5,SOX10,SP1,SRF,TP53 (includes EG:22059),XRCC4	22
Embryonic Development	cell death	cell death of embryonic cells	1,15E-09	ALDH1A2,BCAP31,BLM,CREB1,DHX9,DNMT3A,ETS1,ETV6,GATA6,HIF1A,HTT,MAP3K1,MSH2,PRPF19,RB1,SALL1,SMARCA5,SOX10,SP1,SRF,TP53 (includes EG:22059),XRCC4	22
Cell Cycle	interphase	interphase	1,28E-09	ANP32B,APP,BRCA1,CDK2,CEBPB (includes EG:1051),CEBPD,DAXX,DDX3X,EIF2AK2,EP300,ETV6,FLNA,FOS,GATA1,GATA6,GNB2L1,GPI,GTF2I,HDAC1,HDAC4,IGF1R,IRF1 (includes EG:16362),JUN,LMNA,MDC1,MDM2,MSH2,MYB,MYOCD,NFATC1,NFKBIA,PARP1,PPARA,PPARG,PPP1CA,PRKDC,RB1,RPS6,SIRT1,STAT1,STAT3,THOC1,TMPO,TP53 (includes EG:22059),TP53BP1,XPC,XRCC5	47
Cell Cycle	cell cycle progression	arrest in cell cycle progression	1,42E-09	ARID1B,BRCA1,CDK2,CREB1,EIF2AK2,EP300,FANCD2,LMNA,MAP4,MDM2,MDM4,MSH2,NCOA3,NFKBIA,NR3C1,NR4A2,PML,PPARG,PRKDC,RARA,RB1,SIRT1,SKIL,SSRP1,STAT1,TP53 (includes EG:22059),TP63,TP73,TYMS,XPC,YY1,ZBTB16	32
Cell Death	apoptosis	apoptosis of fibroblast cell lines	1,82E-09	APP,AXIN1,BACH2,BAX,BRCA1,CASP2,CEBPB (includes EG:1051),CFLAR,DAXX,DDX3X,DNMT1,EIF2AK2,EPHX1,ESR1,ETS1,FLI1,FUS,GPI,GSK3B,HIF1A,HSPA5,IKBKG,IRF1 (includes EG:16362),JUN,MAP3K1,MDM2,NFKB2,NR1H2,NR1H3,NR3C1,PARP1,PLAGL2,PLRG1,PML,PTPN1,RB1,STAT1,TP53 (includes EG:22059),TP63,TP73	40
Cell Death	cell death	cell death of fibroblast cell lines	2,08E-09	ACTB,APP,AXIN1,BACH2,BAX,BRCA1,CASP2,CEBPB (includes EG:1051),CFLAR,DAXX,DDX3X,DNMT1,EIF2AK2,EIF5B,ENO1,EPHX1,ESR1,ETS1,FLI1,FUS,GPI,GSK3B,HIF1A,HSF1 (includes EG:15499),HSPA5,IKBKG,IRF1 (includes EG:16362),JUN,KRT8,MAP3K1,MDM2,MKL1,NFKB2,NR1H2,NR1H3,NR3C1,PARK7,PARP1,PLAGL2,PLRG1,PML,PTPN1,RB1,STAT1,TP53 (includes EG:22059),TP63,TP73,XBP1 (includes EG:140614),YWHAZ	49
Cell Death	apoptosis	apoptosis of organ	4,13E-09	APP,ATF7,ATXN1,BAX,BRCA1,CASP2,CDK2,CEBPB (includes EG:1051),CFLAR,DAXX,DLX2,DSP,EP300,ESR1,FOS,GAPDH,GSK3B,HDAC4,HIST1H1C,HSF1 (includes EG:15499),HSF2,HSPA5,HSPD1,HTT,IGF1R,IKBKG,IRF1 (includes EG:16362),IRF2,JUN,KAT5,KRT8,MAFB,MAP3K1,MDM2,NCOA1,NCOA2,NR3C1,NR5A1,OTX1,PARP1,PIAS4,PLRG1,PPARG,PRKDC,PTPN1,RB1,RBBP4,SATB1,SIRT1,STAT1,STAT3,TOP2A,TP53 (includes EG:22059),TP63,TP73,WT1,XBP1 (include…	58
Cell Death	apoptosis	apoptosis of fibroblasts	4,55E-09	APP,BAX,CASP2,CFLAR,CTBP1,CYCS,DAXX,EIF2AK2,EMD,EP300,GSK3B,JUN,KHDRBS1,MAP3K1,MAP4,MDM2,MDM4,MSH2,PARP1,PLRG1,PRKDC,PTPN1,RB1,SENP1,SGPL1,SIRT1,SLK,TP53 (includes EG:22059),TP73	29
Hematological System Development and Function	hematopoiesis	hematopoiesis	7,06E-09	ABCB7,ADAR,ANXA1,AP3D1,BAX,BLM,BRCA1,CDK2,CEBPB (includes EG:1051),CEBPE,CHD4,CREB1,CTBP1,ELF4,ELK1,EP300,EPAS1,ETS1,ETV6,FLNA,FOS,FUS,G6PD,GATA1,HBZ,HIF1A,HIPK2,HOXA9,HSP90AA1,HSP90B1,HSPD1,HTT,IGF1R,IKBKG,IRF1 (includes EG:16362),IRF2,JUN,MAF,MAFB,MDM2,MDM4,MEF2C,MLL5,MYB,NFATC1,NFE2,NFKB2,NFKBIA,PARP1,PML,PNP,PPARG,PRKDC,PTPN1,RAD52 (includes EG:19365),RARA,RB1,RCOR1,RORA,RPL22,RPS6,RXRA,SATB1…	78
Hematopoiesis	hematopoiesis	hematopoiesis	7,06E-09	ABCB7,ADAR,ANXA1,AP3D1,BAX,BLM,BRCA1,CDK2,CEBPB (includes EG:1051),CEBPE,CHD4,CREB1,CTBP1,ELF4,ELK1,EP300,EPAS1,ETS1,ETV6,FLNA,FOS,FUS,G6PD,GATA1,HBZ,HIF1A,HIPK2,HOXA9,HSP90AA1,HSP90B1,HSPD1,HTT,IGF1R,IKBKG,IRF1 (includes EG:16362),IRF2,JUN,MAF,MAFB,MDM2,MDM4,MEF2C,MLL5,MYB,NFATC1,NFE2,NFKB2,NFKBIA,PARP1,PML,PNP,PPARG,PRKDC,PTPN1,RAD52 (includes EG:19365),RARA,RB1,RCOR1,RORA,RPL22,RPS6,RXRA,SATB1…	78
DNA Replication, Recombination, and Repair	repair	repair of DNA	1,03E-08	BAZ1B,BLM,BRCA1,CDK2,FEN1,FOS,MDM2,MSH2,PARP1,PCNA,PNP,PRKDC,RAD52 (includes EG:19365),RARA,SMARCA5,SOD1,TOP1,TP53 (includes EG:22059),TP53BP1,TYMS,XPC,XRCC4,XRCC5	23
Hematological Disease	allergic pulmonary eosinophilia	allergic pulmonary eosinophilia	1,16E-08	ACTB,ALB,ALDOA,ARG1,ENO1,HSPA5,MYH9,PDIA3,PRDX1,TKT,TUBB	11
Immunological Disease	allergic pulmonary eosinophilia	allergic pulmonary eosinophilia	1,16E-08	ACTB,ALB,ALDOA,ARG1,ENO1,HSPA5,MYH9,PDIA3,PRDX1,TKT,TUBB	11
Inflammatory Disease	allergic pulmonary eosinophilia	allergic pulmonary eosinophilia	1,16E-08	ACTB,ALB,ALDOA,ARG1,ENO1,HSPA5,MYH9,PDIA3,PRDX1,TKT,TUBB	11
Respiratory Disease	allergic pulmonary eosinophilia	allergic pulmonary eosinophilia	1,16E-08	ACTB,ALB,ALDOA,ARG1,ENO1,HSPA5,MYH9,PDIA3,PRDX1,TKT,TUBB	11
Cancer	lymphomagenesis	lymphomagenesis	1,26E-08	BAX,BRCA1,CDK2,DNMT1,ETV6,HIF1A,IRF1 (includes EG:16362),MDM2,MDM4,MSH2,NFKB2,NFKBIA,NPM1,PARP1,PRKDC,PTPN1,RAD52 (includes EG:19365),RARA,RB1,SKIL,STAT5A,TP53 (includes EG:22059),TP73,WT1,XRCC5	25
Hematological Disease	lymphomagenesis	lymphomagenesis	1,26E-08	BAX,BRCA1,CDK2,DNMT1,ETV6,HIF1A,IRF1 (includes EG:16362),MDM2,MDM4,MSH2,NFKB2,NFKBIA,NPM1,PARP1,PRKDC,PTPN1,RAD52 (includes EG:19365),RARA,RB1,SKIL,STAT5A,TP53 (includes EG:22059),TP73,WT1,XRCC5	25
Cell Death	apoptosis	apoptosis of brain cells	1,66E-08	APP,ATXN1,BAX,CASP2,EP300,FOS,GAPDH,GSK3B,HDAC4,HSPA5,HTT,IGF1R,JUN,MAP3K1,RB1,SIRT1,TP53 (includes EG:22059),TP63,TP73	19
Cell Death	apoptosis	apoptosis of brain	3,06E-08	APP,ATXN1,BAX,CASP2,EP300,FOS,GAPDH,GSK3B,HDAC4,HSPA5,HTT,IGF1R,JUN,MAP3K1,RB1,SIRT1,STAT1,TP53 (includes EG:22059),TP63,TP73	20
Cell Death	cell death	neuronal cell death	3,39E-08	AARS,ALDH1A2,APP,BAX,CASP2,CDK2,CFLAR,CLCN7,CREB1,CYCS,DAXX,DLX2,EP300,ETV6,FOS,FOXG1,GAPDH,GSK3B,HDAC4,HDGF,HIF1A,HIPK2,HSF1 (includes EG:15499),HSPA5,HSPD1,HSPH1,HTT,IGF1R,JUN,MAP3K1,MEF2C,MSH2,NFKBIA,NPM1,NR1H2,NR3C1,NR4A2,PARK7,PARP1,PDIA3,PLRG1,RB1,RPS3,SIRT1,SLC1A2,SNCA,SOD1,SOX10,SP1,STAT1,STAT3,TP53 (includes EG:22059),TP63,TP73,UBE2K,XRCC4,XRCC5	57
Cellular Function and Maintenance	cytostasis	cytostasis	3,47E-08	BRCA1,CASP2,CEBPB (includes EG:1051),DAXX,EIF2AK2,GATA6,IGF1R,IRF1 (includes EG:16362),JUN,MYH10,NFKBIA,PLAG1,PLAGL2,PML,PRDX1,RB1,RNF111,SAFB,SMAD4,SMC3,STAT1,TP53 (includes EG:22059),TP63,ZBTB16	24
Cellular Growth and Proliferation	proliferation	proliferation of fibroblast cell lines	3,49E-08	ARID5B,ATIC,AXIN1,BACH2,BAX,CEBPB (includes EG:1051),CLTC,CREB1,EBNA1BP2,ETV6,HDGF,HIPK2,JUN,KDM2B,MAPKAPK2,MDM2,MDM4,NOC3L,NPM1,PARP1,PML,PPARG,PRPF19,RB1,SIRT1,SOX6,STAT3,TP53 (includes EG:22059),TP73,WRN,WT1	31
Connective Tissue Development and Function	proliferation	proliferation of fibroblast cell lines	3,49E-08	ARID5B,ATIC,AXIN1,BACH2,BAX,CEBPB (includes EG:1051),CLTC,CREB1,EBNA1BP2,ETV6,HDGF,HIPK2,JUN,KDM2B,MAPKAPK2,MDM2,MDM4,NOC3L,NPM1,PARP1,PML,PPARG,PRPF19,RB1,SIRT1,SOX6,STAT3,TP53 (includes EG:22059),TP73,WRN,WT1	31
Cell Death	cell death	cell death of organ	3,63E-08	APP,ATF7,ATXN1,BAX,BRCA1,CASP2,CDK2,CEBPB (includes EG:1051),CFLAR,DAXX,DLX2,DSP,EP300,ESR1,FOS,GAPDH,GSK3B,HADHA,HDAC4,HIST1H1C,HK1,HK2,HSF1 (includes EG:15499),HSF2,HSPA5,HSPD1,HTT,IGF1R,IKBKG,IRF1 (includes EG:16362),IRF2,JUN,KAT5,KRT8,MAFB,MAP3K1,MDM2,NCOA1,NCOA2,NFKBIA,NR3C1,NR5A1,OTX1,PARK7,PARP1,PIAS4,PLRG1,PML,PPARG,PRKDC,PTPN1,RB1,RBBP4,RXRA,SATB1,SIRT1,SLC25A6,SLK,SOD1,SP1,STAT1,STAT3,T…	70
Cellular Growth and Proliferation	proliferation	proliferation of fibroblasts	3,69E-08	ARID3A,BAX,CDK2,CEBPB (includes EG:1051),ESR1,FBRS,FOS,FOSL2,GPI,JUN,MDM2,MDM4,MORC3,NPM1,NR3C1,PDGFC,PML,RB1,SGPL1,SKIL,STAT1,STAT3,TP53 (includes EG:22059),TP73,VHL,XRCC4,YY1	27
Connective Tissue Development and Function	proliferation	proliferation of fibroblasts	3,69E-08	ARID3A,BAX,CDK2,CEBPB (includes EG:1051),ESR1,FBRS,FOS,FOSL2,GPI,JUN,MDM2,MDM4,MORC3,NPM1,NR3C1,PDGFC,PML,RB1,SGPL1,SKIL,STAT1,STAT3,TP53 (includes EG:22059),TP73,VHL,XRCC4,YY1	27
Cell Death	cell death	cell death of tumor cell lines	3,71E-08	ANXA2,APP,AR,ARG1,ATXN1,BRCA1,CCT2,CCT3,CCT4,CCT5,CCT6A,CCT7,CCT8,CDK2,CFLAR,CTCF (includes EG:10664),G6PD,GATA1,HDAC1,HSP90AB1,HSPA5,HSPA8,HTT,IGF1R,IRF1 (includes EG:16362),MEF2C,MEF2D,NFKBIA,NR3C1,PARK7,PLAGL2,POU5F1,PPARG,RXRA,SNCA,STAT3,TCP1,TP53 (includes EG:22059),TP73,WT1	40
Cell Death	apoptosis	apoptosis of neurons	4,96E-08	AARS,APP,BAX,CASP2,CDK2,CREB1,CYCS,DLX2,EP300,ETV6,FOS,GSK3B,HDAC4,HIF1A,HIPK2,HSPA5,HSPH1,HTT,IGF1R,JUN,MAP3K1,MEF2C,MSH2,NPM1,NR3C1,NR4A2,PLRG1,RB1,RPS3,SIRT1,SNCA,SOD1,TP53 (includes EG:22059),TP63,TP73,XRCC4,XRCC5	37
DNA Replication, Recombination, and Repair	double-stranded DNA break repair	double-stranded DNA break repair	5,24E-08	BAZ1B,MDM2,MSH2,PARP1,PRKDC,SMARCA5,SOD1,TP53 (includes EG:22059),TP53BP1,XRCC4,XRCC5	11
Gene Expression	transcription	initiation of transcription of RNA	6,06E-08	BRCA1,EP300,ESR1,FUBP1,NCOA1,NRIP1,PTRF,SP1,TP53 (includes EG:22059),YY1	10
Protein Synthesis	expression	expression of protein	9,69E-08	APP,CBS,CEBPB (includes EG:1051),CREB1,DHX9,EIF2AK2,EIF2S1,EIF4A1,FLI1,FOS,GSK3B,HNRNPK,HTT,JUN,KHDRBS1,MYBBP1A,NCOA2,NR3C1,PCBP1,PPARG,PPP1CA,PTBP1,RARA,RPL27A,RPS3,RPS6,SNRNP70,SRF,SSB,TP53 (includes EG:22059)	30
Cell Death	apoptosis	apoptosis of central nervous system cells	9,77E-08	APP,ATXN1,BAX,CASP2,EP300,FOS,GAPDH,GSK3B,HDAC4,HSPA5,HTT,IGF1R,JUN,MAP3K1,NPM1,RB1,SIRT1,TP53 (includes EG:22059),TP63,TP73	20
Cancer	transformation	transformation of fibroblasts	9,77E-08	ATIC,CEBPB (includes EG:1051),ETV6,FLI1,FOS,FOXG1,IGF1R,JUN,MDM2,MDM4,NPM1,PES1,PRDX1,RB1,SKIL,STAT3,TP53 (includes EG:22059),TP63,TP73,UBTF	20
Cellular Development	differentiation	differentiation of blood cells	1,00E-07	ANXA1,AP3D1,BACH2,BLM,CEBPB (includes EG:1051),CEBPE,CTBP1,ELK1,EPAS1,ESR1,ETS1,ETV6,FLI1,FOS,GATA1,GSK3B,HIF1A,HOXA9,HSP90AA1,HSP90B1,HSPD1,HTT,IGF1R,IRF1 (includes EG:16362),IRF2,JUN,MAF,MEF2C,MLL5,MSH2,MYB,NFATC1,NFE2,NFKB2,NFKBIA,NR5A1,PARP1,PML,PNP,PPARG,PRKDC,RARA,RB1,RCOR1,RORA,RPL22,RPS6,RXRA,SP1,SP3,STAT1,STAT3,STAT5A,TP53 (includes EG:22059),WT1,XBP1 (includes EG:140614),XRCC4,XRCC5,YY1…	61
Hematological System Development and Function	differentiation	differentiation of blood cells	1,00E-07	ANXA1,AP3D1,BACH2,BLM,CEBPB (includes EG:1051),CEBPE,CTBP1,ELK1,EPAS1,ESR1,ETS1,ETV6,FLI1,FOS,GATA1,GSK3B,HIF1A,HOXA9,HSP90AA1,HSP90B1,HSPD1,HTT,IGF1R,IRF1 (includes EG:16362),IRF2,JUN,MAF,MEF2C,MLL5,MSH2,MYB,NFATC1,NFE2,NFKB2,NFKBIA,NR5A1,PARP1,PML,PNP,PPARG,PRKDC,RARA,RB1,RCOR1,RORA,RPL22,RPS6,RXRA,SP1,SP3,STAT1,STAT3,STAT5A,TP53 (includes EG:22059),WT1,XBP1 (includes EG:140614),XRCC4,XRCC5,YY1…	61
Embryonic Development	development	development of organ	1,07E-07	AARS,ACADM,ACTC1,ALDH1A2,APP,AR,ARID5B,ATF7,AXIN1,BAX,BAZ1B,BRCA1,BRD4,CASP2,CBS,CDK2,CDX2,CEBPB (includes EG:1051),CFLAR,CREB1,CTBP1,DHCR7,DLX2,DNMT3A,DSP,EP300,EPAS1,ESR1,ETS1,FLI1,FLNA,FOSL2,FOXF2,FOXG1,FOXL2,GATA6,GSK3B,HAND1,HDAC1,HDGF,HIF1A,HOXA9,HSF1 (includes EG:15499),HSF2,HSF4,HSP90AB1,HTT,IGF1R,IGF2BP1,IKBKG,IRF1 (includes EG:16362),JUN,JUP,KRT17,KRT6A,KRT9,LECT1,MAF,MAFB,MAP3K1,MDM2,M…	130
Organ Development	development	development of organ	1,07E-07	AARS,ACADM,ACTC1,ALDH1A2,APP,AR,ARID5B,ATF7,AXIN1,BAX,BAZ1B,BRCA1,BRD4,CASP2,CBS,CDK2,CDX2,CEBPB (includes EG:1051),CFLAR,CREB1,CTBP1,DHCR7,DLX2,DNMT3A,DSP,EP300,EPAS1,ESR1,ETS1,FLI1,FLNA,FOSL2,FOXF2,FOXG1,FOXL2,GATA6,GSK3B,HAND1,HDAC1,HDGF,HIF1A,HOXA9,HSF1 (includes EG:15499),HSF2,HSF4,HSP90AB1,HTT,IGF1R,IGF2BP1,IKBKG,IRF1 (includes EG:16362),JUN,JUP,KRT17,KRT6A,KRT9,LECT1,MAF,MAFB,MAP3K1,MDM2,M…	130
Organismal Development	development	development of organ	1,07E-07	AARS,ACADM,ACTC1,ALDH1A2,APP,AR,ARID5B,ATF7,AXIN1,BAX,BAZ1B,BRCA1,BRD4,CASP2,CBS,CDK2,CDX2,CEBPB (includes EG:1051),CFLAR,CREB1,CTBP1,DHCR7,DLX2,DNMT3A,DSP,EP300,EPAS1,ESR1,ETS1,FLI1,FLNA,FOSL2,FOXF2,FOXG1,FOXL2,GATA6,GSK3B,HAND1,HDAC1,HDGF,HIF1A,HOXA9,HSF1 (includes EG:15499),HSF2,HSF4,HSP90AB1,HTT,IGF1R,IGF2BP1,IKBKG,IRF1 (includes EG:16362),JUN,JUP,KRT17,KRT6A,KRT9,LECT1,MAF,MAFB,MAP3K1,MDM2,M…	130
Tissue Development	development	development of organ	1,07E-07	AARS,ACADM,ACTC1,ALDH1A2,APP,AR,ARID5B,ATF7,AXIN1,BAX,BAZ1B,BRCA1,BRD4,CASP2,CBS,CDK2,CDX2,CEBPB (includes EG:1051),CFLAR,CREB1,CTBP1,DHCR7,DLX2,DNMT3A,DSP,EP300,EPAS1,ESR1,ETS1,FLI1,FLNA,FOSL2,FOXF2,FOXG1,FOXL2,GATA6,GSK3B,HAND1,HDAC1,HDGF,HIF1A,HOXA9,HSF1 (includes EG:15499),HSF2,HSF4,HSP90AB1,HTT,IGF1R,IGF2BP1,IKBKG,IRF1 (includes EG:16362),JUN,JUP,KRT17,KRT6A,KRT9,LECT1,MAF,MAFB,MAP3K1,MDM2,M…	130
Cellular Development	differentiation	differentiation of stem cells	1,43E-07	APP,DLX2,DNMT1,ETV4,GATA6,GSK3B,HIF1A,HSP90B1,HTT,MAFA,MYB,NFE2,NMT1,NR4A2,NR5A1,POU5F1,PPARG,PROX1,RB1,RNF2,SRF,STAT3,TFAP2C,TLN1,TP53 (includes EG:22059)	25
Hematological System Development and Function	myelopoiesis	myelopoiesis	1,59E-07	ADAR,CEBPE,EPAS1,ETV6,FLNA,G6PD,GATA1,HBZ,HIF1A,HIPK2,HOXA9,IGF1R,JUN,MDM4,MLL5,MYB,NFE2,PML,PTPN1,RARA,RB1,RCOR1,RPS6,RXRA,SOX6,SP3,STAT3,STAT5A,TP53 (includes EG:22059),WT1,ZFPM1	31
Hematopoiesis	myelopoiesis	myelopoiesis	1,59E-07	ADAR,CEBPE,EPAS1,ETV6,FLNA,G6PD,GATA1,HBZ,HIF1A,HIPK2,HOXA9,IGF1R,JUN,MDM4,MLL5,MYB,NFE2,PML,PTPN1,RARA,RB1,RCOR1,RPS6,RXRA,SOX6,SP3,STAT3,STAT5A,TP53 (includes EG:22059),WT1,ZFPM1	31
Cell Cycle	interphase	arrest in interphase	1,66E-07	BRCA1,CDK2,CEBPB (includes EG:1051),CEBPD,DAXX,EIF2AK2,EP300,ETV6,FLNA,FOS,GATA1,GTF2I,HDAC1,IRF1 (includes EG:16362),JUN,LMNA,MDM2,MSH2,PARP1,PPP1CA,PRKDC,RB1,SIRT1,STAT1,THOC1,TMPO,TP53 (includes EG:22059),TP53BP1,XPC	29
Cellular Growth and Proliferation	proliferation	proliferation of connective tissue cells	1,75E-07	ARID3A,ATIC,BAX,CDK2,CEBPB (includes EG:1051),CLTC,ESR1,ETV6,FBRS,FLI1,FOS,FOSL2,GATA1,GPI,JUN,KHDRBS1,MDM2,MDM4,MORC3,NFKB2,NPM1,NR3C1,PDGFC,PML,PPARG,PTPN1,RB1,SGPL1,SKIL,SLC3A2,SMAD4,SMC3,STAT1,STAT3,TP53 (includes EG:22059),TP73,TRPS1,VHL,XRCC4,YY1	40
Tissue Development	development	tissue development	2,12E-07	AARS,ACADM,ACTC1,ACTG1,ADAR,ALDH1A2,AMOT,ANXA2,APP,AR,ARID5B,ATF7,ATXN2,AXIN1,BAX,BAZ1B,BMP2K,BRCA1,BRD4,CA2,CAPN2,CASP2,CBS,CDK2,CDX2,CEBPB (includes EG:1051),CEBPD,CFLAR,CREB1,CTBP1,CTCF (includes EG:10664),DHCR7,DLGAP3,DLX2,DNMT3A,DSP,EMD,EP300,EPAS1,ESR1,ESRRG,ETS1,ETV6,FLI1,FLNA,FLNC,FOS,FOSL2,FOXF2,FOXG1,FOXL2,G6PD,GATA1,GATA6,GSK3B,HAND1,HDAC1,HDAC4,HDGF,HIF1A,HIPK2,HIST1H1B,HOXA9,HSF1 (in…	173
Cancer	cancer	cancer	2,44E-07	ACTB,ALB,ALDOA,ALDOC,ANXA1,ANXA5,AR,BAX,BLM,BRCA1,CDK2,CEBPB (includes EG:1051),CFLAR,CREB1,CSE1L,DNMT1,ENO1,EPAS1,ESR1,ETS1,ETV6,FANCD2,FEN1,FOS,GATA1,GPI,HIF1A,HOXA9,HSPA4,IGF1R,IGF2BP1,IKBKG,IMPDH2,IRF1 (includes EG:16362),JUN,KLF3,KRT13,LDHA,MAML1,MDM2,MDM4,MKI67,MSH2,MSH6,NCOA3,NFKB2,NFKBIA,NPM1,PARP1,PDGFC,PML,PPARA,PPARG,PRKDC,PTPN1,RAD52 (includes EG:19365),RARA,RB1,RNF111,RRM2,S100A9,SKI…	77
Protein Synthesis	synthesis	synthesis of protein	2,77E-07	ALB,APP,CBS,CEBPB (includes EG:1051),CREB1,DHX9,EEF2,EIF2AK2,EIF2S1,EIF4A1,EIF5B,FLI1,FOS,GSK3B,HNRNPK,HTT,JUN,KHDRBS1,KRT17,MYBBP1A,NCOA2,NR3C1,PARK7,PCBP1,PGR (includes EG:18667),PPARA,PPARG,PPP1CA,PTBP1,RARA,RPL27A,RPS3,RPS6,SNRNP70,SRF,SSB,TP53 (includes EG:22059)	37
Cancer	neoplasia	neoplasia	2,92E-07	ACTB,ALB,ALDOA,ALDOC,ANXA1,ANXA5,AR,BAX,BLM,BRCA1,CDK2,CEBPB (includes EG:1051),CFLAR,CREB1,CSE1L,DNMT1,ENO1,EPAS1,ESR1,ETS1,ETV6,FANCD2,FEN1,FOS,GATA1,GPI,HIF1A,HOXA9,HSPA4,IGF1R,IGF2BP1,IKBKG,IMPDH2,IRF1 (includes EG:16362),JUN,KLF3,KRT13,LDHA,MAML1,MDM2,MDM4,MKI67,MSH2,MSH6,NCOA3,NFKB2,NFKBIA,NPM1,NR3C1,NR4A2,PARP1,PDGFC,PML,PPARA,PPARG,PRKDC,PTPN1,RAD52 (includes EG:19365),RARA,RB1,RNF111,RRM…	80
RNA Post-Transcriptional Modification	processing	processing of RNA	3,01E-07	APP,BOP1/LOC727967,DKC1,EBNA1BP2,FBL,HNRNPA1,HTT,KHDRBS1,NPM1,PCBP1,PRPF31,RPS6,SF3B1,SRPK1,UPF1,WT1	16
Cellular Growth and Proliferation	growth	arrest in growth of cells	3,21E-07	EIF2AK2,EP300,FASN,FLI1,GTF2I,HIF1A,IGF1R,LMNA,MAZ,MDM2,NFKBIA,PML,PPARG,RB1,SMAD4,SMARCA5,STAT1,TP53 (includes EG:22059),TP63,TP73,WT1	21
Cancer	carcinoma	carcinoma	3,70E-07	ALB,ALDOA,ALDOC,ANXA1,AR,BAX,BRCA1,CDK2,CEBPB (includes EG:1051),CREB1,DNMT1,ENO1,EPAS1,ESR1,FANCD2,GPI,HIF1A,IGF1R,IKBKG,IMPDH2,JUN,KRT13,LDHA,MAML1,MDM2,MDM4,MSH2,NCOA3,NFKBIA,PDGFC,PML,PPARA,PPARG,RARA,RB1,RNF111,RRM2,S100A9,SMAD4,SOD1,STAT3,TP53 (includes EG:22059),TPR,TYMS,USP25,VHL,XPC	47
Cancer	solid tumor	solid tumor	3,73E-07	ALB,ALDOA,ALDOC,ANXA1,AR,BAX,BLM,BRCA1,CDK2,CEBPB (includes EG:1051),CREB1,DNMT1,ENO1,EPAS1,ESR1,FANCD2,FOS,GATA1,GPI,HIF1A,HSPA4,IGF1R,IKBKG,IMPDH2,JUN,KRT13,LDHA,MAML1,MDM2,MDM4,MSH2,NCOA3,NFKBIA,PDGFC,PML,PPARA,PPARG,RARA,RB1,RNF111,RRM2,S100A9,SMAD4,SOD1,STAT3,TP53 (includes EG:22059),TPR,TYMS,USP25,VHL,XPC	51
Organ Morphology	size	size of organ	4,02E-07	ANXA1,AR,BAX,BRCA1,DNMT3A,DYRK1A,FOXL2,HOXA9,HSP90B1,HTT,IGF1R,MAF,NCOA1,NCOA3,NPM1,NR3C1,NR3C2 (includes EG:110784),OTX1,RARA,SATB1,SIRT1,SMAD4,SREBF2,TP53 (includes EG:22059),TP63,WDR77,WT1,ZBTB16	28
Cellular Development	differentiation	differentiation of hematopoietic cells	4,14E-07	CTBP1,EPAS1,ESR1,ETV6,FLI1,GATA1,GSK3B,HIF1A,HTT,MEF2C,MYB,NFE2,NR5A1,PML,PNP,PRKDC,RARA,RB1,RCOR1,RXRA,SP1,SP3,STAT5A,TP53 (includes EG:22059),WT1,XRCC4,YY1,ZBTB16,ZFPM1	29
Hematological System Development and Function	differentiation	differentiation of hematopoietic cells	4,14E-07	CTBP1,EPAS1,ESR1,ETV6,FLI1,GATA1,GSK3B,HIF1A,HTT,MEF2C,MYB,NFE2,NR5A1,PML,PNP,PRKDC,RARA,RB1,RCOR1,RXRA,SP1,SP3,STAT5A,TP53 (includes EG:22059),WT1,XRCC4,YY1,ZBTB16,ZFPM1	29
Hematopoiesis	differentiation	differentiation of hematopoietic cells	4,14E-07	CTBP1,EPAS1,ESR1,ETV6,FLI1,GATA1,GSK3B,HIF1A,HTT,MEF2C,MYB,NFE2,NR5A1,PML,PNP,PRKDC,RARA,RB1,RCOR1,RXRA,SP1,SP3,STAT5A,TP53 (includes EG:22059),WT1,XRCC4,YY1,ZBTB16,ZFPM1	29
Tissue Development	development	development of muscle	4,73E-07	ACTC1,ACTG1,ALDH1A2,AR,ARID5B,CAPN2,CTBP1,EMD,EP300,FLNC,FOSL2,GATA6,GSK3B,HAND1,HDAC1,HIF1A,HIST1H1B,HSP90B1,IGF1R,JUN,LEMD2,LEMD3,MAML1,MEF2C,MYH10,MYH9,NCOA2,NFKBIA,PROX1,RB1,RXRA,SRF,TBX1,TP63,VCL,WT1,ZFPM1	37
Skeletal and Muscular System Development and Function	development	development of muscle	4,73E-07	ACTC1,ACTG1,ALDH1A2,AR,ARID5B,CAPN2,CTBP1,EMD,EP300,FLNC,FOSL2,GATA6,GSK3B,HAND1,HDAC1,HIF1A,HIST1H1B,HSP90B1,IGF1R,JUN,LEMD2,LEMD3,MAML1,MEF2C,MYH10,MYH9,NCOA2,NFKBIA,PROX1,RB1,RXRA,SRF,TBX1,TP63,VCL,WT1,ZFPM1	37
Cell Death	apoptosis	apoptosis of blood cells	5,17E-07	APP,ATF7,BAX,BRCA1,CASP2,CDK2,CEBPB (includes EG:1051),CFLAR,EIF2AK2,FOS,GATA1,HDAC1,HIF1A,HIPK2,HIST1H1C,HOXA9,HSP90AB1,IKBKE,IRF1 (includes EG:16362),IRF2,JUN,MDM2,MSH2,NFATC1,NFKB2,NFKBIA,NR3C1,NR5A1,PARP1,PDIA3,PNP,PPARA,PPARG,PRKDC,RPS6,SATB1,SKIL,STAT1,STAT3,STAT5A,TOP2A,TP53 (includes EG:22059),TP73,XRCC5	44
Cell Death	survival	survival of embryonic stem cells	5,35E-07	BCAP31,DNMT1,PARP1,POU5F1,TP53 (includes EG:22059),TP53BP1,WRN,XRCC5	8
Embryonic Development	survival	survival of embryonic stem cells	5,35E-07	BCAP31,DNMT1,PARP1,POU5F1,TP53 (includes EG:22059),TP53BP1,WRN,XRCC5	8
Cancer	hematological neoplasia	hematological neoplasia	6,32E-07	BAX,BRCA1,CDK2,DNMT1,ETV6,HIF1A,HOXA9,IRF1 (includes EG:16362),MDM2,MDM4,MSH2,MSH6,NFKB2,NFKBIA,NPM1,PARP1,PML,PRKDC,PTPN1,RAD52 (includes EG:19365),RARA,RB1,SKIL,STAT5A,TP53 (includes EG:22059),TP73,WT1,XRCC5	28
Hematological Disease	hematological neoplasia	hematological neoplasia	6,32E-07	BAX,BRCA1,CDK2,DNMT1,ETV6,HIF1A,HOXA9,IRF1 (includes EG:16362),MDM2,MDM4,MSH2,MSH6,NFKB2,NFKBIA,NPM1,PARP1,PML,PRKDC,PTPN1,RAD52 (includes EG:19365),RARA,RB1,SKIL,STAT5A,TP53 (includes EG:22059),TP73,WT1,XRCC5	28
Cancer	tumorigenesis	tumorigenesis of malignant tumor	6,87E-07	ANXA1,BLM,BRCA1,CDK2,ESR1,ETV6,FOS,MAML1,MDM2,MDM4,MSH2,NFKBIA,NPM1,PARP1,PPARA,PPARG,PRKDC,PTPN1,RB1,SKIL,SMAD4,STAT3,TP53 (includes EG:22059),TPR,VHL,XPC,XRCC5	27
Cancer	lung tumor	lung tumor	6,91E-07	ALDOA,ALDOC,DNMT1,ENO1,EPAS1,FANCD2,GPI,HIF1A,IGF1R,IMPDH2,LDHA,MSH6,PCNA,PPARG,RARA,RRM2,STAT3,TP53 (includes EG:22059),TYMS,VHL,XPC	21
Respiratory Disease	lung tumor	lung tumor	6,91E-07	ALDOA,ALDOC,DNMT1,ENO1,EPAS1,FANCD2,GPI,HIF1A,IGF1R,IMPDH2,LDHA,MSH6,PCNA,PPARG,RARA,RRM2,STAT3,TP53 (includes EG:22059),TYMS,VHL,XPC	21
Cell Death	apoptosis	apoptosis of embryonic cells	7,02E-07	ALDH1A2,BCAP31,BLM,CREB1,DNMT3A,ETS1,ETV6,GATA6,HIF1A,HTT,MAP3K1,PRPF19,RB1,SALL1,SRF,TP53 (includes EG:22059)	16
Embryonic Development	apoptosis	apoptosis of embryonic cells	7,02E-07	ALDH1A2,BCAP31,BLM,CREB1,DNMT3A,ETS1,ETV6,GATA6,HIF1A,HTT,MAP3K1,PRPF19,RB1,SALL1,SRF,TP53 (includes EG:22059)	16
Cellular Compromise	stress response	stress response of cells	8,24E-07	APP,ATP2A2,BRCA1,CEBPB (includes EG:1051),HIF1A,HSF1 (includes EG:15499),HSP90B1,PML,RARA,RXRA,SNCA,TP53 (includes EG:22059),XBP1 (includes EG:140614)	13
Cell Death	apoptosis	apoptosis of mononuclear leukocytes	1,04E-06	APP,BAX,BRCA1,CASP2,CDK2,CFLAR,FOS,HIST1H1C,HOXA9,IKBKE,JUN,MDM2,MSH2,NFATC1,NFKB2,NFKBIA,NR3C1,NR5A1,PARP1,PDIA3,PNP,PPARA,PRKDC,RPS6,SATB1,SKIL,STAT1,STAT3,STAT5A,TOP2A,TP53 (includes EG:22059),TP73,XRCC5	33
Cellular Function and Maintenance	endoplasmic reticulum stress response	endoplasmic reticulum stress response	1,07E-06	AARS,ATP2A2,BAX,CEBPB (includes EG:1051),EIF2AK2,GSK3B,HSP90AA1,HSP90B1,HSPA5,HSPH1,PML,RARA,XBP1 (includes EG:140614)	13
Cellular Growth and Proliferation	growth	growth of connective tissue cells	1,25E-06	FANCD2,FOS,HIF1A,IGF1R,JUN,KRT17,MAP3K1,MDM4,NPM1,NR3C1,PML,PPARG,RARA,RB1,SAFB,SGPL1,SMAD4,STAT1,STAT3,TP53 (includes EG:22059),TP63,TP73	22
Cell Death	survival	survival of embryonic cells	1,34E-06	BCAP31,DNMT1,PARP1,POU5F1,RB1,SOX10,TP53 (includes EG:22059),TP53BP1,WRN,XRCC5	10
Embryonic Development	survival	survival of embryonic cells	1,34E-06	BCAP31,DNMT1,PARP1,POU5F1,RB1,SOX10,TP53 (includes EG:22059),TP53BP1,WRN,XRCC5	10
Cellular Development	differentiation	differentiation of hematopoietic progenitor cells	1,34E-06	CTBP1,EPAS1,ESR1,ETV6,FLI1,GATA1,GSK3B,HIF1A,HTT,MEF2C,MYB,NFE2,NR5A1,PNP,PRKDC,RARA,RB1,RCOR1,RXRA,SP1,SP3,STAT5A,TP53 (includes EG:22059),WT1,XRCC4,YY1,ZFPM1	27
Hematological System Development and Function	differentiation	differentiation of hematopoietic progenitor cells	1,34E-06	CTBP1,EPAS1,ESR1,ETV6,FLI1,GATA1,GSK3B,HIF1A,HTT,MEF2C,MYB,NFE2,NR5A1,PNP,PRKDC,RARA,RB1,RCOR1,RXRA,SP1,SP3,STAT5A,TP53 (includes EG:22059),WT1,XRCC4,YY1,ZFPM1	27
Hematopoiesis	differentiation	differentiation of hematopoietic progenitor cells	1,34E-06	CTBP1,EPAS1,ESR1,ETV6,FLI1,GATA1,GSK3B,HIF1A,HTT,MEF2C,MYB,NFE2,NR5A1,PNP,PRKDC,RARA,RB1,RCOR1,RXRA,SP1,SP3,STAT5A,TP53 (includes EG:22059),WT1,XRCC4,YY1,ZFPM1	27
Cell Death	cell death	cell death of central nervous system cells	1,47E-06	ALB,APP,ATXN1,BAX,CASP2,CFLAR,EP300,FOS,GAPDH,GSK3B,HDAC4,HSPA5,HSPD1,HTT,IGF1R,JUN,MAP3K1,NFKBIA,NPM1,PARK7,PARP1,RB1,SIRT1,TP53 (includes EG:22059),TP63,TP73	26
Cellular Growth and Proliferation	growth	growth of cells	1,62E-06	ALB,AR,ARID4A,AXIN1,BRCA1,BRD4,CEBPB (includes EG:1051),CEBPD,CTBP1,CTCF (includes EG:10664),DDX3X,EEF1D,EIF2AK2,ELK1,EP300,ETV6,FANCD2,FASN,FLI1,FOS,FOXG1,GATA1,GNB2L1,GSK3B,GTF2I,GTPBP4,HDGF,HIF1A,HIPK2,HOXA9,IGF1R,IRF1 (includes EG:16362),IRF2,JUN,KHDRBS1,KRT17,LDHA,LMNA,MAML1,MAP3K1,MAZ,MDM2,MDM4,MYB,MYOCD,NFATC1,NFKBIA,NPM1,NR1H2,NR3C1,NR4A2,PARP1,PLAG1,PLAGL2,PML,POU5F1,PPARA,PPARG,RARA,RB1…	85
Cell Death	apoptosis	apoptosis of lymphocytes	1,73E-06	BAX,BRCA1,CASP2,CDK2,CFLAR,FOS,HIST1H1C,HOXA9,IKBKE,JUN,MDM2,MSH2,NFATC1,NFKB2,NFKBIA,NR3C1,NR5A1,PARP1,PDIA3,PNP,PPARA,PRKDC,RPS6,SATB1,SKIL,STAT1,STAT3,STAT5A,TOP2A,TP53 (includes EG:22059),TP73,XRCC5	32
Organismal Development	growth	growth of organism	2,01E-06	ADH5 (includes EG:11532),AR,ARG1,ARID5B,BAX,CBS,DHCR7,DYRK1A,FANCD2,FOSL2,HIF1A,HSPA5,IGF1R,IGF2BP1,IKBKG,ITPR3,KRT6A,LMNA,NCOA1,NCOA3,NFKBIA,OTX1,PARP1,PLAG1,PPARG,RARA,RB1,SLC1A2,SLC30A7,STAT3,STIM1,TFAP2C,TKT,TP53 (includes EG:22059),TP53BP1,WRN,XRCC5,YY1,ZMPSTE24	39
Cellular Development	differentiation	differentiation of megakaryocytes	2,03E-06	FLI1,GATA1,MEF2C,MYB,NFE2,RCOR1,SP1,SP3,ZFPM1	9
Hematological System Development and Function	differentiation	differentiation of megakaryocytes	2,03E-06	FLI1,GATA1,MEF2C,MYB,NFE2,RCOR1,SP1,SP3,ZFPM1	9
Hematopoiesis	differentiation	differentiation of megakaryocytes	2,03E-06	FLI1,GATA1,MEF2C,MYB,NFE2,RCOR1,SP1,SP3,ZFPM1	9
Cellular Development	development	development of blood cells	2,33E-06	ADAR,ANXA1,AP3D1,BAX,BLM,BRCA1,CDK2,CEBPB (includes EG:1051),CHD4,CREB1,ELF4,ELK1,EP300,EPAS1,ETS1,FOS,FUS,G6PD,GATA1,HIF1A,HOXA9,HSP90AA1,HSP90B1,HSPD1,IGF1R,IKBKG,IRF1 (includes EG:16362),IRF2,MAF,MAFB,MYB,NFATC1,NFKB2,NFKBIA,PARP1,PNP,PRKDC,RAD52 (includes EG:19365),RARA,RB1,RORA,RPL22,RPS6,SATB1,SGPL1,SOD1,SOX6,SP3,SRF,STAT1,STAT3,STAT5A,TP53 (includes EG:22059),WT1,XBP1 (includes EG:140614),…	59
Hematological System Development and Function	development	development of blood cells	2,33E-06	ADAR,ANXA1,AP3D1,BAX,BLM,BRCA1,CDK2,CEBPB (includes EG:1051),CHD4,CREB1,ELF4,ELK1,EP300,EPAS1,ETS1,FOS,FUS,G6PD,GATA1,HIF1A,HOXA9,HSP90AA1,HSP90B1,HSPD1,IGF1R,IKBKG,IRF1 (includes EG:16362),IRF2,MAF,MAFB,MYB,NFATC1,NFKB2,NFKBIA,PARP1,PNP,PRKDC,RAD52 (includes EG:19365),RARA,RB1,RORA,RPL22,RPS6,SATB1,SGPL1,SOD1,SOX6,SP3,SRF,STAT1,STAT3,STAT5A,TP53 (includes EG:22059),WT1,XBP1 (includes EG:140614),…	59
Hematopoiesis	development	development of blood cells	2,33E-06	ADAR,ANXA1,AP3D1,BAX,BLM,BRCA1,CDK2,CEBPB (includes EG:1051),CHD4,CREB1,ELF4,ELK1,EP300,EPAS1,ETS1,FOS,FUS,G6PD,GATA1,HIF1A,HOXA9,HSP90AA1,HSP90B1,HSPD1,IGF1R,IKBKG,IRF1 (includes EG:16362),IRF2,MAF,MAFB,MYB,NFATC1,NFKB2,NFKBIA,PARP1,PNP,PRKDC,RAD52 (includes EG:19365),RARA,RB1,RORA,RPL22,RPS6,SATB1,SGPL1,SOD1,SOX6,SP3,SRF,STAT1,STAT3,STAT5A,TP53 (includes EG:22059),WT1,XBP1 (includes EG:140614),…	59
Cell Death	apoptosis	apoptosis of leukocytes	2,61E-06	APP,BAX,BRCA1,CASP2,CDK2,CEBPB (includes EG:1051),CFLAR,EIF2AK2,FOS,HIF1A,HIST1H1C,HOXA9,HSP90AB1,IKBKE,IRF1 (includes EG:16362),IRF2,JUN,MDM2,MSH2,NFATC1,NFKB2,NFKBIA,NR3C1,NR5A1,PARP1,PDIA3,PNP,PPARA,PPARG,PRKDC,RPS6,SATB1,SKIL,STAT1,STAT3,STAT5A,TOP2A,TP53 (includes EG:22059),TP73,XRCC5	40
DNA Replication, Recombination, and Repair	damage	DNA damage	2,65E-06	APP,EIF2AK2,EP300,MDM2,MSH6,NPM1,PARP1,PDIA3,PPARA,PRDX1,PRMT1,RB1,RRM2,SNCA,SOD1,TOP2B,TP53 (includes EG:22059)	17
Nucleic Acid Metabolism	biosynthesis	biosynthesis of nucleoside triphosphate	2,68E-06	ATP5B,CYCS,HIF1A,HTT,PARP1,PKM2,PNP,SIRT1,STAT3,TP53 (includes EG:22059)	10
Small Molecule Biochemistry	biosynthesis	biosynthesis of nucleoside triphosphate	2,68E-06	ATP5B,CYCS,HIF1A,HTT,PARP1,PKM2,PNP,SIRT1,STAT3,TP53 (includes EG:22059)	10
Cellular Function and Maintenance	maintenance	maintenance of telomeres	3,02E-06	BLM,HIF1A,HNRNPA1,PARP1,PRKDC,RB1,TP53 (includes EG:22059),WRN,XRCC5	9
Cellular Assembly and Organization	maintenance	maintenance of telomeres	3,02E-06	BLM,HIF1A,HNRNPA1,PARP1,PRKDC,RB1,TP53 (includes EG:22059),WRN,XRCC5	9
Cellular Development	differentiation	differentiation of embryonic stem cells	3,38E-06	DNMT1,GATA6,HSP90B1,HTT,NMT1,NR4A2,POU5F1,PPARG,RB1,RNF2,SRF,STAT3,TFAP2C,TLN1	14
Embryonic Development	differentiation	differentiation of embryonic stem cells	3,38E-06	DNMT1,GATA6,HSP90B1,HTT,NMT1,NR4A2,POU5F1,PPARG,RB1,RNF2,SRF,STAT3,TFAP2C,TLN1	14
Cancer	development	development of carcinoma	3,52E-06	BAX,BRCA1,CEBPB (includes EG:1051),JUN,NCOA3,NFKBIA,PDGFC,PML,PPARA,RARA,RB1,STAT3,TP53 (includes EG:22059)	13
Gene Expression	binding	binding of DNA fragment	3,75E-06	CREB1,EP300,NFKB2,NPM1,PARP1,PPARG,PRKDC,SMAD4,TP53 (includes EG:22059),TP73,XPC	11
Gene Expression	expression	initiation of expression of RNA	3,75E-06	BRCA1,EP300,ESR1,FUBP1,NCOA1,NRIP1,PTRF,RARA,SP1,TP53 (includes EG:22059),YY1	11
Tissue Morphology	quantity	quantity of cells	3,97E-06	ACTN4,ANXA1,APP,AR,ARNTL,BAX,BLM,BRCA1,CASP2,CBS,CDK2,CEBPB (includes EG:1051),CFLAR,CREB1,DLX2,DNMT1,DYRK1A,ELF4,EP300,EPAS1,ESR1,ETS1,ETV6,FANCD2,FERMT3,FLI1,FLNA,FLNC,FOS,FOSL2,GATA1,GATA6,HBZ,HDGF,HIF1A,HIPK2,HOXA9,HSF1 (includes EG:15499),HSF2,HSP90B1,HTT,IGF1R,IKBKG,IRF1 (includes EG:16362),IRF2,KRT8,MAF,MAFB,MAPKAPK2,MDM2,MSH2,MYB,MYH9,NCOA2,NFATC1,NFE2,NFKB2,NFKBIA,NPM1,NR3C1,NR3C2 (inclu…	96
Cell Cycle	interphase	interphase of fibroblast cell lines	4,00E-06	BRCA1,DDX3X,EP300,FOS,GATA6,GNB2L1,GPI,GTF2I,HDAC1,JUN,LMNA,MDM2,MSH2,PARP1,PRKDC,RB1,SIRT1,TP53 (includes EG:22059)	18
Cell Death	apoptosis	apoptosis of hematopoietic cells	4,15E-06	ATF7,BAX,BRCA1,CASP2,CDK2,EIF2AK2,FOS,GATA1,HDAC1,HIPK2,HIST1H1C,JUN,MDM2,NR3C1,NR5A1,PARP1,PRKDC,SATB1,STAT5A,TOP2A,TP53 (includes EG:22059),TP73,XRCC5	23
Cell Death	cell death	cell death of tumor cells	4,19E-06	ANXA2,APP,AR,BAX,CASP2,CFLAR,CYCS,EIF2AK2,EP300,FASN,IGF1R,IRF1 (includes EG:16362),JUN,MAP3K1,MEF2C,NFKBIA,NOLC1,NR3C1,PARP1,PNP,RB1,STAT3,THOC1,TP53 (includes EG:22059),TP73,VHL,WT1	27
Cardiovascular Disease	dilated cardiomyopathy	dilated cardiomyopathy	4,39E-06	ACTC1,CREB1,IGF1R,IKBKG,LMNA,MDM4,MYH9,PDGFC,PPP1CA,RXRA,VCL,VHL,ZMPSTE24	13
Cell Death	cell death	cell death of blood cells	4,73E-06	APP,ATF7,BAX,BLM,BRCA1,CASP2,CDK2,CEBPB (includes EG:1051),CFLAR,DAXX,EIF2AK2,ETV6,FOS,GATA1,GSK3B,HDAC1,HIF1A,HIPK2,HIST1H1C,HK1,HOXA9,HSP90AB1,IKBKE,IKBKG,IRF1 (includes EG:16362),IRF2,JUN,MDM2,MSH2,MYB,NFATC1,NFKB2,NFKBIA,NR3C1,NR5A1,PARP1,PCNA,PDIA3,PNP,PPARA,PPARG,PRKDC,RB1,RPS6,SATB1,SKIL,STAT1,STAT3,STAT5A,TOP2A,TP53 (includes EG:22059),TP73,XBP1 (includes EG:140614),XRCC5,YWHAZ,ZMYM2	56
Cell Cycle	remodeling	remodeling of chromatin	4,93E-06	BAZ1B,CHD1,HSF1 (includes EG:15499),MTA2,NR3C1,PARP1,RARA,RBBP4,RERE,SATB2,SMARCA5	11
DNA Replication, Recombination, and Repair	remodeling	remodeling of chromatin	4,93E-06	BAZ1B,CHD1,HSF1 (includes EG:15499),MTA2,NR3C1,PARP1,RARA,RBBP4,RERE,SATB2,SMARCA5	11
Cellular Assembly and Organization	remodeling	remodeling of chromatin	4,93E-06	BAZ1B,CHD1,HSF1 (includes EG:15499),MTA2,NR3C1,PARP1,RARA,RBBP4,RERE,SATB2,SMARCA5	11
DNA Replication, Recombination, and Repair	DNA damage response	DNA damage response of cells	6,11E-06	BAX,FANCD2,HIPK2,MSH2,MSH6,PLRG1,PML,TOPORS,TP53 (includes EG:22059),TP53BP1,TP63,TP73,XPC,YY1	14
Cancer	tumorigenesis	tumorigenesis of organ	6,12E-06	AR,BAX,BRCA1,CASP2,CDK2,CEBPB (includes EG:1051),DNMT1,EPHX1,ESR1,ETV4,FOS,IKBKG,JUN,KRT10,KRT17,MAML1,NFKB2,NFKBIA,NR1H2,PARP1,PGR (includes EG:18667),PPARA,PPARG,RB1,SMAD4,SOD1,TP53 (includes EG:22059),TPR,XPC	29
Cell Death	apoptosis	apoptosis of granule cells	6,30E-06	BAX,EP300,FOS,HDAC4,IGF1R,JUN,MAP3K1,RB1,TP53 (includes EG:22059)	9
Cellular Development	development	development of leukocytes	6,49E-06	ADAR,ANXA1,AP3D1,BAX,BLM,BRCA1,CDK2,CEBPB (includes EG:1051),CHD4,CREB1,ELF4,ELK1,EP300,ETS1,FOS,FUS,GATA1,HIF1A,HOXA9,HSP90AA1,HSP90B1,HSPD1,IGF1R,IKBKG,IRF1 (includes EG:16362),IRF2,MAF,MAFB,MYB,NFATC1,NFKB2,NFKBIA,PARP1,PNP,PRKDC,RAD52 (includes EG:19365),RARA,RORA,RPL22,RPS6,SATB1,SP3,SRF,STAT1,STAT3,STAT5A,TP53 (includes EG:22059),WT1,XBP1 (includes EG:140614),XRCC4,XRCC5,ZFPM1	52
Hematological System Development and Function	development	development of leukocytes	6,49E-06	ADAR,ANXA1,AP3D1,BAX,BLM,BRCA1,CDK2,CEBPB (includes EG:1051),CHD4,CREB1,ELF4,ELK1,EP300,ETS1,FOS,FUS,GATA1,HIF1A,HOXA9,HSP90AA1,HSP90B1,HSPD1,IGF1R,IKBKG,IRF1 (includes EG:16362),IRF2,MAF,MAFB,MYB,NFATC1,NFKB2,NFKBIA,PARP1,PNP,PRKDC,RAD52 (includes EG:19365),RARA,RORA,RPL22,RPS6,SATB1,SP3,SRF,STAT1,STAT3,STAT5A,TP53 (includes EG:22059),WT1,XBP1 (includes EG:140614),XRCC4,XRCC5,ZFPM1	52
Hematopoiesis	development	development of leukocytes	6,49E-06	ADAR,ANXA1,AP3D1,BAX,BLM,BRCA1,CDK2,CEBPB (includes EG:1051),CHD4,CREB1,ELF4,ELK1,EP300,ETS1,FOS,FUS,GATA1,HIF1A,HOXA9,HSP90AA1,HSP90B1,HSPD1,IGF1R,IKBKG,IRF1 (includes EG:16362),IRF2,MAF,MAFB,MYB,NFATC1,NFKB2,NFKBIA,PARP1,PNP,PRKDC,RAD52 (includes EG:19365),RARA,RORA,RPL22,RPS6,SATB1,SP3,SRF,STAT1,STAT3,STAT5A,TP53 (includes EG:22059),WT1,XBP1 (includes EG:140614),XRCC4,XRCC5,ZFPM1	52
Lymphoid Tissue Structure and Development	development	development of leukocytes	6,49E-06	ADAR,ANXA1,AP3D1,BAX,BLM,BRCA1,CDK2,CEBPB (includes EG:1051),CHD4,CREB1,ELF4,ELK1,EP300,ETS1,FOS,FUS,GATA1,HIF1A,HOXA9,HSP90AA1,HSP90B1,HSPD1,IGF1R,IKBKG,IRF1 (includes EG:16362),IRF2,MAF,MAFB,MYB,NFATC1,NFKB2,NFKBIA,PARP1,PNP,PRKDC,RAD52 (includes EG:19365),RARA,RORA,RPL22,RPS6,SATB1,SP3,SRF,STAT1,STAT3,STAT5A,TP53 (includes EG:22059),WT1,XBP1 (includes EG:140614),XRCC4,XRCC5,ZFPM1	52
Cell Death	cell death	cell death of brain cells	6,52E-06	APP,ATXN1,BAX,CASP2,CFLAR,EP300,FOS,GAPDH,GSK3B,HDAC4,HSPA5,HSPD1,HTT,IGF1R,JUN,MAP3K1,NFKBIA,PARK7,RB1,SIRT1,TP53 (includes EG:22059),TP63,TP73	23
Cell Cycle	modification	modification of chromatin	6,71E-06	BAZ1B,CHD1,HDAC1,HSF1 (includes EG:15499),MTA2,NR3C1,PARP1,RARA,RBBP4,RERE,SAP18,SATB2,SMARCA5	13
DNA Replication, Recombination, and Repair	modification	modification of chromatin	6,71E-06	BAZ1B,CHD1,HDAC1,HSF1 (includes EG:15499),MTA2,NR3C1,PARP1,RARA,RBBP4,RERE,SAP18,SATB2,SMARCA5	13
Cancer	non-Hodgkin's disease	non-Hodgkin's disease	6,71E-06	BAX,CDK2,ETV6,MDM4,MSH2,NFKB2,NFKBIA,PARP1,PTPN1,RAD52 (includes EG:19365),TP53 (includes EG:22059),TP73,XRCC5	13
Hematological Disease	non-Hodgkin's disease	non-Hodgkin's disease	6,71E-06	BAX,CDK2,ETV6,MDM4,MSH2,NFKB2,NFKBIA,PARP1,PTPN1,RAD52 (includes EG:19365),TP53 (includes EG:22059),TP73,XRCC5	13
DNA Replication, Recombination, and Repair	annealing	annealing of RNA	7,87E-06	HNRNPA1,HNRNPC,HNRNPU,TP53 (includes EG:22059)	4
RNA Post-Transcriptional Modification	annealing	annealing of RNA	7,87E-06	HNRNPA1,HNRNPC,HNRNPU,TP53 (includes EG:22059)	4
Gene Expression	binding	binding of promoter fragment	7,87E-06	CREB1,EP300,PPARG,TP53 (includes EG:22059)	4
DNA Replication, Recombination, and Repair	loss	loss of chromosomes	7,87E-06	DNMT1,MDM4,PRMT1,TP53 (includes EG:22059)	4
Cellular Development	growth	growth of fibroblasts	7,95E-06	FANCD2,HIF1A,IGF1R,JUN,MAP3K1,MDM4,NPM1,PML,PPARG,RARA,SAFB,SGPL1,SMAD4,STAT1,STAT3,TP53 (includes EG:22059),TP73	17
Cellular Growth and Proliferation	growth	growth of fibroblasts	7,95E-06	FANCD2,HIF1A,IGF1R,JUN,MAP3K1,MDM4,NPM1,PML,PPARG,RARA,SAFB,SGPL1,SMAD4,STAT1,STAT3,TP53 (includes EG:22059),TP73	17
Connective Tissue Development and Function	growth	growth of fibroblasts	7,95E-06	FANCD2,HIF1A,IGF1R,JUN,MAP3K1,MDM4,NPM1,PML,PPARG,RARA,SAFB,SGPL1,SMAD4,STAT1,STAT3,TP53 (includes EG:22059),TP73	17
Cell Death	cell death	cell death of brain	8,01E-06	APP,ATXN1,BAX,CASP2,CFLAR,EP300,FOS,GAPDH,GSK3B,HDAC4,HSPA5,HSPD1,HTT,IGF1R,JUN,MAP3K1,NFKBIA,PARK7,RB1,SIRT1,SP1,STAT1,TP53 (includes EG:22059),TP63,TP73	25
Cancer	transformation	transformation	8,26E-06	AR,ATIC,BAX,BRCA1,CDK2,CDX2,CEBPB (includes EG:1051),CLTC,DNMT1,EEF1D,EP300,ESR1,ETS1,ETV6,FLI1,FOS,FOXG1,G6PD,GPI,HOXA9,IGF1R,IRF1 (includes EG:16362),JUN,MAF,MDM2,MDM4,MYB,NFKB2,NPM1,NRL,PES1,PML,PRDX1,PRMT5,RB1,RPS3A,RUVBL1,SKIL,SMC3,STAT3,TP53 (includes EG:22059),TP63,TP73,UBTF,YY1	45
Cellular Development	immortalization	immortalization	8,27E-06	ARID3A,GATA1,HDAC1,HOXA9,JUN,KDM2B,SAFB,TP53 (includes EG:22059),TP73,WRN,YAP1 (includes EG:10413)	11
Gene Expression	bending	bending of DNA	8,67E-06	FOS,GATA1,JUN,MYB,SRF,UBTF,YY1	7
DNA Replication, Recombination, and Repair	bending	bending of DNA	8,67E-06	FOS,GATA1,JUN,MYB,SRF,UBTF,YY1	7
Nucleic Acid Metabolism	synthesis	synthesis of ATP	8,85E-06	ATP5B,CYCS,HIF1A,HTT,PARP1,PKM2,SIRT1,STAT3,TP53 (includes EG:22059)	9
Small Molecule Biochemistry	synthesis	synthesis of ATP	8,85E-06	ATP5B,CYCS,HIF1A,HTT,PARP1,PKM2,SIRT1,STAT3,TP53 (includes EG:22059)	9
Energy Production	synthesis	synthesis of ATP	8,85E-06	ATP5B,CYCS,HIF1A,HTT,PARP1,PKM2,SIRT1,STAT3,TP53 (includes EG:22059)	9
Cell Cycle	G1 phase	G1 phase	9,00E-06	BRCA1,CDK2,CEBPB (includes EG:1051),EIF2AK2,EP300,ETV6,GATA1,GNB2L1,GPI,IGF1R,IRF1 (includes EG:16362),JUN,LMNA,MDM2,MYB,MYOCD,NFATC1,NFKBIA,PPARA,PPP1CA,PRKDC,RB1,RPS6,SIRT1,STAT3,TMPO,TP53 (includes EG:22059)	27
Organismal Development	size	size of animal	9,45E-06	BLM,BRD4,CANX,CTBP1,DNMT3A,DYRK1A,FOS,HOXA9,IGF2BP1,NR3C1,RARA,RB1,SATB1,SIRT1,STAT5A,TP53 (includes EG:22059),VCL,ZBTB16	18
Tissue Development	myogenesis	myogenesis	1,07E-05	ACTG1,AR,CAPN2,EMD,FOSL2,GSK3B,HDAC1,HIF1A,JUN,LEMD2,LEMD3,MYH10,MYH9,NFKBIA,PROX1,RB1,SRF	17
Skeletal and Muscular System Development and Function	myogenesis	myogenesis	1,07E-05	ACTG1,AR,CAPN2,EMD,FOSL2,GSK3B,HDAC1,HIF1A,JUN,LEMD2,LEMD3,MYH10,MYH9,NFKBIA,PROX1,RB1,SRF	17
Cancer	development	development of malignant tumor	1,17E-05	BAX,BRCA1,CEBPB (includes EG:1051),JUN,NCOA3,NFKB2,NFKBIA,PDGFC,PML,PPARA,RAD52 (includes EG:19365),RARA,RB1,STAT3,TP53 (includes EG:22059),XPC	16
Nucleic Acid Metabolism	quantity	quantity of ATP	1,21E-05	ENO1,HIF1A,HTT,KRT8,LDHA,PARP1,PPARG,RXRA,SOX6,SREBF2	10
Small Molecule Biochemistry	quantity	quantity of ATP	1,21E-05	ENO1,HIF1A,HTT,KRT8,LDHA,PARP1,PPARG,RXRA,SOX6,SREBF2	10
Energy Production	quantity	quantity of ATP	1,21E-05	ENO1,HIF1A,HTT,KRT8,LDHA,PARP1,PPARG,RXRA,SOX6,SREBF2	10
Molecular Transport	quantity	quantity of ATP	1,21E-05	ENO1,HIF1A,HTT,KRT8,LDHA,PARP1,PPARG,RXRA,SOX6,SREBF2	10
Organismal Injury and Abnormalities	degeneration	degeneration of organ	1,22E-05	APP,ATXN7,CLCN7,CREB1,ESR1,GSK3B,HTT,NCOA2,PRKDC,SIRT1,SNCA,STAT1,TRIM28	13
Cell Death	apoptosis	apoptosis of tumor cells	1,24E-05	ANXA2,BAX,CASP2,CYCS,EIF2AK2,EP300,FASN,IGF1R,IRF1 (includes EG:16362),JUN,MAP3K1,MEF2C,NFKBIA,NOLC1,PARP1,PNP,RB1,STAT3,THOC1,TP53 (includes EG:22059),TP73,VHL	22
Cell Death	cell death	cell death of cancer cells	1,30E-05	APP,AR,BAX,CASP2,CFLAR,EIF2AK2,FASN,IGF1R,IRF1 (includes EG:16362),JUN,MAP3K1,NFKBIA,NR3C1,PARP1,PNP,RB1,STAT3,TP53 (includes EG:22059),VHL,WT1	20
Cell Death	apoptosis	apoptosis of hematopoietic progenitor cells	1,36E-05	BAX,BRCA1,CASP2,CDK2,FOS,GATA1,HDAC1,HIPK2,HIST1H1C,JUN,MDM2,NR3C1,NR5A1,PARP1,PRKDC,SATB1,STAT5A,TOP2A,TP53 (includes EG:22059),TP73,XRCC5	21
Cell Cycle	G2 phase	G2 phase	1,36E-05	APP,BRCA1,EIF2AK2,FLNA,HDAC1,HDAC4,JUN,LMNA,MDC1,MSH2,PARP1,RB1,THOC1,TP53 (includes EG:22059),TP53BP1,XPC	16
Cellular Development	branching	branching of mammary duct	1,41E-05	AR,BRCA1,CEBPB (includes EG:1051),ESR1,NCOA2,NFKB2,PGR (includes EG:18667)	7
Organ Morphology	branching	branching of mammary duct	1,41E-05	AR,BRCA1,CEBPB (includes EG:1051),ESR1,NCOA2,NFKB2,PGR (includes EG:18667)	7
Reproductive System Development and Function	branching	branching of mammary duct	1,41E-05	AR,BRCA1,CEBPB (includes EG:1051),ESR1,NCOA2,NFKB2,PGR (includes EG:18667)	7
Cancer	adenocarcinoma	adenocarcinoma	1,41E-05	ALDOA,ALDOC,AR,BRCA1,ENO1,EPAS1,FANCD2,GPI,IMPDH2,LDHA,MSH2,RB1,SMAD4,STAT3,TP53 (includes EG:22059),TYMS,VHL,XPC	18
Cancer	transformation	cell transformation	1,47E-05	ATIC,BAX,BRCA1,CDK2,CEBPB (includes EG:1051),CLTC,DNMT1,EEF1D,EP300,ESR1,ETS1,ETV6,FLI1,FOS,FOXG1,G6PD,GPI,HOXA9,IGF1R,IRF1 (includes EG:16362),JUN,MAF,MDM2,MDM4,MYB,NFKB2,NPM1,NRL,PES1,PML,PRDX1,PRMT5,RB1,RPS3A,RUVBL1,SKIL,SMC3,STAT3,TP53 (includes EG:22059),TP63,TP73,UBTF,YY1	43
Hematological System Development and Function	erythropoiesis	erythropoiesis	1,52E-05	ADAR,EPAS1,ETV6,G6PD,GATA1,HBZ,HIF1A,HIPK2,MDM4,MLL5,MYB,RB1,RCOR1,RPS6,RXRA,SOX6,SP3,STAT5A,TP53 (includes EG:22059),WT1,ZFPM1	21
Hematopoiesis	erythropoiesis	erythropoiesis	1,52E-05	ADAR,EPAS1,ETV6,G6PD,GATA1,HBZ,HIF1A,HIPK2,MDM4,MLL5,MYB,RB1,RCOR1,RPS6,RXRA,SOX6,SP3,STAT5A,TP53 (includes EG:22059),WT1,ZFPM1	21
Cell Death	cell death	cell death of embryonic stem cells	1,58E-05	BCAP31,DNMT3A,ETS1,HIF1A,HTT,MAP3K1,MSH2,SP1,SRF,TP53 (includes EG:22059)	10
Embryonic Development	cell death	cell death of embryonic stem cells	1,58E-05	BCAP31,DNMT3A,ETS1,HIF1A,HTT,MAP3K1,MSH2,SP1,SRF,TP53 (includes EG:22059)	10
Cancer	lung adenocarcinoma	lung adenocarcinoma	1,64E-05	ALDOA,ALDOC,ENO1,EPAS1,FANCD2,GPI,IMPDH2,LDHA,TP53 (includes EG:22059),TYMS,VHL,XPC	12
Respiratory Disease	lung adenocarcinoma	lung adenocarcinoma	1,64E-05	ALDOA,ALDOC,ENO1,EPAS1,FANCD2,GPI,IMPDH2,LDHA,TP53 (includes EG:22059),TYMS,VHL,XPC	12
Genetic Disorder	lung adenocarcinoma	lung adenocarcinoma	1,64E-05	ALDOA,ALDOC,ENO1,EPAS1,FANCD2,GPI,IMPDH2,LDHA,TP53 (includes EG:22059),TYMS,VHL,XPC	12
Cancer	tumorigenesis	tumorigenesis of lymphoma	1,64E-05	CDK2,ETV6,MDM4,MSH2,NFKBIA,NPM1,PRKDC,PTPN1,RB1,SKIL,TP53 (includes EG:22059),XRCC5	12
Hematological Disease	tumorigenesis	tumorigenesis of lymphoma	1,64E-05	CDK2,ETV6,MDM4,MSH2,NFKBIA,NPM1,PRKDC,PTPN1,RB1,SKIL,TP53 (includes EG:22059),XRCC5	12
Immunological Disease	tumorigenesis	tumorigenesis of lymphoma	1,64E-05	CDK2,ETV6,MDM4,MSH2,NFKBIA,NPM1,PRKDC,PTPN1,RB1,SKIL,TP53 (includes EG:22059),XRCC5	12
Cell Death	cell death	cell death of hematopoietic cells	1,65E-05	ATF7,BAX,BRCA1,CASP2,CDK2,EIF2AK2,FOS,GATA1,HDAC1,HIPK2,HIST1H1C,JUN,MDM2,NR3C1,NR5A1,PARP1,PRKDC,RB1,SATB1,STAT5A,TOP2A,TP53 (includes EG:22059),TP73,XRCC5	24
Cancer	hyperproliferation	hyperproliferation of organ	1,69E-05	AR,BRCA1,CASP2,CDK2,CEBPB (includes EG:1051),ESR1,FOS,IKBKG,KRT17,MAML1,NFKB2,NFKBIA,NR1H2,PGR (includes EG:18667),PPARG,RB1,RXRA,SMAD4,SOD1,TP53 (includes EG:22059),TPR,WDR77,XPC	23
Organismal Survival	viability	viability	1,79E-05	BRCA1,DYRK1A,ETV6,FBL,FUS,HBZ,PFN1,PRKDC,STAT5A,TKT,TP53 (includes EG:22059),VCL,XRCC5,YY1	14
Cellular Development	differentiation	differentiation of embryonic cells	1,85E-05	CDX2,DNMT1,GATA6,HSP90B1,HTT,JUN,NMT1,NR4A2,POU5F1,PPARG,RB1,RNF2,RXRA,SOX10,SP1,SP3,SRF,STAT3,TFAP2C,TLN1	20
Embryonic Development	differentiation	differentiation of embryonic cells	1,85E-05	CDX2,DNMT1,GATA6,HSP90B1,HTT,JUN,NMT1,NR4A2,POU5F1,PPARG,RB1,RNF2,RXRA,SOX10,SP1,SP3,SRF,STAT3,TFAP2C,TLN1	20
Protein Synthesis	metabolism	metabolism of protein	1,90E-05	APP,ARNTL,AXIN1,CANX,DHX9,DLD,EEF2,EIF2AK2,EIF2S1,EIF4A1,GSK3B,HNRNPK,HSP90B1,HSPA5,HTT,IPO9,KRT17,MDM2,MORC3,NR1H2,NR1H3,NRD1 (includes EG:230598),PARK7,PCBP1,PPARA,PPP1CA,PSMD2,PTBP1,RARA,RPL27A,RPS3,RPS6,SERPINB1,SNRNP70,SSB,TP53 (includes EG:22059),TRIM24,USP25,VCP,VHL,XPO1,ZMPSTE24	42
Gene Expression	binding	binding of protein binding site	1,91E-05	APEX1,APP,AR,CEBPB (includes EG:1051),EP300,ESR1,ETV6,FLI1,FOS,HDAC1,HOXA9,JUN,LMNA,NFKB2,NFKBIA,NR3C1,PARP1,PML,PPARG,PPP1CC,SMAD4,SP1,STAT1,TP53 (includes EG:22059),YY1	25
Cellular Response to Therapeutics	radiosensitivity	radiosensitivity	2,04E-05	MSH2,PARP1,TP53 (includes EG:22059),TP53BP1,XRCC4	5
DNA Replication, Recombination, and Repair	metabolism	metabolism of DNA	2,16E-05	ABCB7,APP,BAX,BRCA1,EIF2AK2,FBL,FEN1,HNRNPA1,KRT8,LMNA,MCM2,NPM1,ORC5 (includes EG:26429),PARP1,PCNA,PPIA,PPP1CC,RB1,SNCA,SOD1,SP1,TOP1,TOP2A,TP53 (includes EG:22059),WRN,XRCC5	26
Small Molecule Biochemistry	accumulation	accumulation of lipid droplets	2,20E-05	DSP,NCOA1,NCOA3,NR1H2,NR1H3,PPARG,UBE2I	7
Cellular Assembly and Organization	accumulation	accumulation of lipid droplets	2,20E-05	DSP,NCOA1,NCOA3,NR1H2,NR1H3,PPARG,UBE2I	7
Lipid Metabolism	accumulation	accumulation of lipid droplets	2,20E-05	DSP,NCOA1,NCOA3,NR1H2,NR1H3,PPARG,UBE2I	7
Cell Death	cell viability	cell viability of connective tissue cells	2,20E-05	BRCA1,FOS,IGF1R,LMNA,TP53 (includes EG:22059),TP63,XRCC5	7
Cancer	hyperplasia	hyperplasia of breast	2,24E-05	BRCA1,CDK2,CEBPB (includes EG:1051),ESR1,NFKB2,PGR (includes EG:18667),RB1,SMAD4,TP53 (includes EG:22059)	9
Cell Death	cell death	cell death of immune cells	2,30E-05	APP,BAX,BLM,BRCA1,CASP2,CDK2,CEBPB (includes EG:1051),CFLAR,DAXX,EIF2AK2,ETV6,FOS,GATA1,GSK3B,HIF1A,HIST1H1C,HK1,HOXA9,HSP90AB1,IKBKE,IKBKG,IRF1 (includes EG:16362),IRF2,JUN,MDM2,MSH2,MYB,NFATC1,NFKB2,NFKBIA,NR3C1,NR5A1,PARP1,PCNA,PDIA3,PNP,PPARA,PPARG,PRKDC,RPS6,SATB1,SKIL,STAT1,STAT3,STAT5A,TOP2A,TP53 (includes EG:22059),TP73,XBP1 (includes EG:140614),XRCC5,YWHAZ,ZMYM2	52
Cellular Function and Maintenance	homeostasis	homeostasis of leukocytes	2,45E-05	ANXA1,AP3D1,BAX,BLM,BRCA1,CDK2,CEBPB (includes EG:1051),CHD4,CREB1,ELF4,ELK1,EP300,ETS1,GATA1,HIF1A,HOXA9,HSP90AA1,HSP90B1,HSPD1,IGF1R,IKBKG,IRF1 (includes EG:16362),IRF2,MAF,MEF2C,MYB,NFATC1,PARP1,PNP,PRKDC,RAD52 (includes EG:19365),RORA,RPL22,RPS6,SATB1,SKIL,SOD1,SP3,SRF,STAT1,STAT3,STAT5A,TP53 (includes EG:22059),WT1,XRCC4,XRCC5,ZFPM1	47
Cellular Development	differentiation	differentiation of heart cells	2,64E-05	ACADM,GATA6,GSK3B,MEF2C,MYOCD,RARA,RB1,RXRA,SMAD4,SOX6,TBX1	11
Cancer	development	development of tumor	2,77E-05	ANXA2,BAX,BRCA1,CEBPB (includes EG:1051),DNMT1,ESR1,IRF1 (includes EG:16362),JUN,NCOA3,NFKB2,NFKBIA,NR3C1,PDGFC,PML,PPARA,PPARG,RAD52 (includes EG:19365),RARA,RB1,STAT3,TP53 (includes EG:22059),VHL,XPC	23
Post-Translational Modification	conformational modification	conformational modification of protein	2,93E-05	AARS,CANX,HSF1 (includes EG:15499),HSP90AA1,HSPA5,HSPA8,TCP1,TP53 (includes EG:22059)	8
Cellular Movement	cell movement	cell movement	3,00E-05	ACTB,ACTN4,ALDOA,AMOT,ANXA1,ANXA2,ANXA5,APP,ARG1,ARID5B,ATP2B4,BAX,CAP1,CAPN2,CBLL1,CEBPE,CSE1L,DAPK3,DAXX,DDX3X,DLX2,ELF4,EPAS1,ESR1,ETS1,ETV4,ETV6,FERMT3,FLNA,FOS,FOSL2,GNB2L1,GPI,GSK3B,HAND1,HDAC1,HIF1A,HSP90AA1,HSP90AB1,HSP90B1,HSPA5,HSPD1,HTT,IGF1R,IGF2BP1,IKBKG,JUP,KDM2B,KLF8,KRT10,KRT6A,LMNA,MAFB,MAP3K1,MAPKAPK2,MCM2,MCM3,MPP1,MRC2,MYB,MYH10,MYH9,NFATC1,NFKB2,NFKBIA,NPM1,NR4A2,NRD1 (includ…	112
Cell Morphology	morphology	morphology of cells	3,09E-05	ACTN4,ANXA1,APP,ARG1,AXIN1,BAX,BLM,BRD4,CAP1,CAPN2,CEBPB (includes EG:1051),CEBPE,ESR1,FLNA,FLNC,FOS,GATA1,HTT,JUN,KRT8,MAZ,NFE2,NR3C1,NR5A1,NRL,PPARG,PTBP1,RB1,RXRA,SRF,STAT3,TLN1,TP53 (includes EG:22059),VCL,ZBTB16	35
Cell Death	cell death	cell death of cortical neurons	3,14E-05	APP,BAX,CASP2,CFLAR,EP300,GSK3B,HSPA5,HSPD1,HTT,NFKBIA,PARK7,SIRT1,TP53 (includes EG:22059),TP63,TP73	15
Cellular Development	differentiation	differentiation of lymphatic system cells	3,16E-05	CTBP1,FLI1,GATA1,GSK3B,HIF1A,MEF2C,MYB,NFE2,NFKB2,NR5A1,PML,RARA,RB1,RCOR1,SP1,SP3,STAT5A,TP53 (includes EG:22059),ZFPM1	19
Cellular Function and Maintenance	autophagy	autophagy of cells	3,21E-05	BAX,CASP2,EIF2AK2,EIF2S1,EP300,GSK3B,HSPA8,HTT,IKBKG,PPARG,RB1,SIRT1,SOD1,TP53 (includes EG:22059),TP73,XBP1 (includes EG:140614)	16
Cell Morphology	autophagy	autophagy of cells	3,21E-05	BAX,CASP2,EIF2AK2,EIF2S1,EP300,GSK3B,HSPA8,HTT,IKBKG,PPARG,RB1,SIRT1,SOD1,TP53 (includes EG:22059),TP73,XBP1 (includes EG:140614)	16
Cellular Development	growth	growth of fibroblast cell lines	3,28E-05	BRD4,CEBPB (includes EG:1051),DDX3X,EEF1D,EIF2AK2,ETV6,FLI1,FOS,GNB2L1,IGF1R,IRF1 (includes EG:16362),IRF2,KHDRBS1,LMNA,NFKBIA,NPM1,PLAG1,PLAGL2,PML,RB1,SKIL,SLC3A2,SMC3,STAT3,TP53 (includes EG:22059)	25
Cellular Growth and Proliferation	growth	growth of fibroblast cell lines	3,28E-05	BRD4,CEBPB (includes EG:1051),DDX3X,EEF1D,EIF2AK2,ETV6,FLI1,FOS,GNB2L1,IGF1R,IRF1 (includes EG:16362),IRF2,KHDRBS1,LMNA,NFKBIA,NPM1,PLAG1,PLAGL2,PML,RB1,SKIL,SLC3A2,SMC3,STAT3,TP53 (includes EG:22059)	25
Connective Tissue Development and Function	growth	growth of fibroblast cell lines	3,28E-05	BRD4,CEBPB (includes EG:1051),DDX3X,EEF1D,EIF2AK2,ETV6,FLI1,FOS,GNB2L1,IGF1R,IRF1 (includes EG:16362),IRF2,KHDRBS1,LMNA,NFKBIA,NPM1,PLAG1,PLAGL2,PML,RB1,SKIL,SLC3A2,SMC3,STAT3,TP53 (includes EG:22059)	25
Cell Death	apoptosis	apoptosis of epithelial cell lines	3,32E-05	CEBPD,ESR1,FOS,IKBKG,JUN,NR5A1,TP53 (includes EG:22059)	7
DNA Replication, Recombination, and Repair	damage	damage of chromosomes	3,32E-05	BLM,BRCA1,MDM2,MSH2,PARP1,SOD1,TP53 (includes EG:22059)	7
Cellular Compromise	damage	damage of chromosomes	3,32E-05	BLM,BRCA1,MDM2,MSH2,PARP1,SOD1,TP53 (includes EG:22059)	7
Cell Death	cell death	cell death of granule cells	3,32E-05	APP,BAX,EP300,FOS,HDAC4,IGF1R,JUN,MAP3K1,RB1,TP53 (includes EG:22059)	10
Cellular Development	developmental process	developmental process of T lymphocytes	3,51E-05	ANXA1,AP3D1,BAX,BLM,BRCA1,CDK2,CEBPB (includes EG:1051),CHD4,CREB1,ELF4,ELK1,EP300,ETS1,FOS,GATA1,HIF1A,HOXA9,HSP90AA1,HSP90B1,HSPD1,IGF1R,IRF1 (includes EG:16362),IRF2,MAF,MYB,NFATC1,NR1H2,PARP1,PNP,PPARG,PRKDC,RAD52 (includes EG:19365),RORA,RPL22,RPS6,SATB1,SP3,SRF,STAT1,STAT3,STAT5A,TP53 (includes EG:22059),WT1,XRCC4,XRCC5,ZFPM1	46
Cellular Development	developmental process	developmental process of red blood cells	3,54E-05	ADAR,EPAS1,ETV6,G6PD,GATA1,HBZ,HIF1A,HIPK2,MLL5,RB1,RCOR1,RPS6,RXRA,SOX6,SP3,STAT5A,TP53 (includes EG:22059),WT1,ZFPM1	19
Hematological System Development and Function	developmental process	developmental process of red blood cells	3,54E-05	ADAR,EPAS1,ETV6,G6PD,GATA1,HBZ,HIF1A,HIPK2,MLL5,RB1,RCOR1,RPS6,RXRA,SOX6,SP3,STAT5A,TP53 (includes EG:22059),WT1,ZFPM1	19
Hematopoiesis	developmental process	developmental process of red blood cells	3,54E-05	ADAR,EPAS1,ETV6,G6PD,GATA1,HBZ,HIF1A,HIPK2,MLL5,RB1,RCOR1,RPS6,RXRA,SOX6,SP3,STAT5A,TP53 (includes EG:22059),WT1,ZFPM1	19
Cell Death	cell viability	cell viability	3,57E-05	APP,BAX,BRCA1,EEF2,ELK1,ESR1,FOS,HSP90AB1,HTT,IGF1R,LMNA,MSH2,NFKBIA,PARP1,PRKDC,SNCA,SOD1,TP53 (includes EG:22059),TP63,VDAC1,XRCC5	21
Cell Cycle	cell division process	cell division process of chromosomes	3,58E-05	BAX,BLM,BRCA1,BRD4,CTCF (includes EG:10664),EBNA1BP2,GATA1,MYB,PARP1,PRMT1,RAN,RB1,SATB1,SREBF1,TOP2A,TP53 (includes EG:22059),YY1	17
Cellular Development	developmental process	developmental process of lymphocytes	3,66E-05	ANXA1,AP3D1,APP,BACH2,BAX,BLM,BRCA1,CDK2,CEBPB (includes EG:1051),CHD4,CREB1,ELF4,ELK1,EP300,ETS1,FOS,FUS,GATA1,HIF1A,HOXA9,HSP90AA1,HSP90B1,HSPD1,IGF1R,IKBKG,IRF1 (includes EG:16362),IRF2,MAF,MDM2,MSH2,MYB,NFATC1,NFKB2,NR1H2,PARP1,PNP,PPARG,PRKDC,RAD52 (includes EG:19365),RORA,RPL22,RPS6,SATB1,SP3,SRF,STAT1,STAT3,STAT5A,TP53 (includes EG:22059),WT1,XBP1 (includes EG:140614),XRCC4,XRCC5,YY1,ZFPM1	55
Cellular Function and Maintenance	homeostasis	Lymphocyte homeostasis	3,70E-05	ANXA1,AP3D1,BAX,BLM,BRCA1,CDK2,CEBPB (includes EG:1051),CHD4,CREB1,ELF4,ELK1,EP300,ETS1,GATA1,HIF1A,HOXA9,HSP90AA1,HSP90B1,HSPD1,IGF1R,IKBKG,IRF1 (includes EG:16362),IRF2,MAF,MEF2C,MYB,NFATC1,PARP1,PNP,PRKDC,RAD52 (includes EG:19365),RORA,RPL22,RPS6,SATB1,SKIL,SP3,SRF,STAT1,STAT3,STAT5A,TP53 (includes EG:22059),WT1,XRCC4,XRCC5,ZFPM1	46
Cellular Function and Maintenance	homeostasis	cellular homeostasis	3,81E-05	ABCB7,ALB,AMOT,ANXA1,AP3D1,APP,ATP2A2,ATP2B4,BAX,BCAP31,BLM,BRCA1,CASP2,CDK2,CEBPB (includes EG:1051),CHD4,CREB1,CYCS,DLD,EIF2AK2,EIF2S1,ELF4,ELK1,EP300,ETS1,GATA1,GSK3B,HIF1A,HOXA9,HSF1 (includes EG:15499),HSP90AA1,HSP90B1,HSPA8,HSPD1,HTT,IGF1R,IKBKG,IRF1 (includes EG:16362),IRF2,KCNA5,MAF,MEF2C,MYB,NFATC1,NR3C1,NR3C2 (includes EG:110784),PARP1,PLCB3,PNP,POU5F1,PPARA,PPARG,PRKDC,PSMD2,RAD52 (inc…	79
Cancer	hyperplasia	hyperplasia	3,94E-05	AR,BAX,BRCA1,CASP2,CDK2,CEBPB (includes EG:1051),ESR1,FOS,IGF1R,KRT17,MAML1,MYB,NCOA1,NCOA3,NFKB2,NFKBIA,NR1H2,PGR (includes EG:18667),PPARG,PPIA,PRKDC,RB1,RORA,SMAD4,SOD1,STAT3,TP53 (includes EG:22059),TPR,VASP,XPC	30
Cancer	development	development of digestive organ tumor	4,04E-05	JUN,PDGFC,PML,PPARA,RARA,RB1,STAT3,TP53 (includes EG:22059)	8
DNA Replication, Recombination, and Repair	recombination	recombination	4,29E-05	BLM,BRCA1,DNMT1,FANCD2,MSH2,MSH6,PARP1,PRKDC,RAD52 (includes EG:19365),TP53 (includes EG:22059),WRN,XRCC4	12
Cellular Development	development	T cell development	4,37E-05	ANXA1,AP3D1,BAX,BLM,BRCA1,CDK2,CEBPB (includes EG:1051),CHD4,CREB1,ELF4,ELK1,EP300,ETS1,GATA1,HIF1A,HOXA9,HSP90AA1,HSP90B1,HSPD1,IGF1R,IRF1 (includes EG:16362),IRF2,MAF,MYB,NFATC1,PARP1,PNP,PRKDC,RAD52 (includes EG:19365),RORA,RPL22,RPS6,SATB1,SP3,SRF,STAT1,STAT3,STAT5A,TP53 (includes EG:22059),WT1,XRCC4,XRCC5,ZFPM1	43
Hematological System Development and Function	development	T cell development	4,37E-05	ANXA1,AP3D1,BAX,BLM,BRCA1,CDK2,CEBPB (includes EG:1051),CHD4,CREB1,ELF4,ELK1,EP300,ETS1,GATA1,HIF1A,HOXA9,HSP90AA1,HSP90B1,HSPD1,IGF1R,IRF1 (includes EG:16362),IRF2,MAF,MYB,NFATC1,PARP1,PNP,PRKDC,RAD52 (includes EG:19365),RORA,RPL22,RPS6,SATB1,SP3,SRF,STAT1,STAT3,STAT5A,TP53 (includes EG:22059),WT1,XRCC4,XRCC5,ZFPM1	43
Hematopoiesis	development	T cell development	4,37E-05	ANXA1,AP3D1,BAX,BLM,BRCA1,CDK2,CEBPB (includes EG:1051),CHD4,CREB1,ELF4,ELK1,EP300,ETS1,GATA1,HIF1A,HOXA9,HSP90AA1,HSP90B1,HSPD1,IGF1R,IRF1 (includes EG:16362),IRF2,MAF,MYB,NFATC1,PARP1,PNP,PRKDC,RAD52 (includes EG:19365),RORA,RPL22,RPS6,SATB1,SP3,SRF,STAT1,STAT3,STAT5A,TP53 (includes EG:22059),WT1,XRCC4,XRCC5,ZFPM1	43
Cellular Function and Maintenance	development	T cell development	4,37E-05	ANXA1,AP3D1,BAX,BLM,BRCA1,CDK2,CEBPB (includes EG:1051),CHD4,CREB1,ELF4,ELK1,EP300,ETS1,GATA1,HIF1A,HOXA9,HSP90AA1,HSP90B1,HSPD1,IGF1R,IRF1 (includes EG:16362),IRF2,MAF,MYB,NFATC1,PARP1,PNP,PRKDC,RAD52 (includes EG:19365),RORA,RPL22,RPS6,SATB1,SP3,SRF,STAT1,STAT3,STAT5A,TP53 (includes EG:22059),WT1,XRCC4,XRCC5,ZFPM1	43
Lymphoid Tissue Structure and Development	development	T cell development	4,37E-05	ANXA1,AP3D1,BAX,BLM,BRCA1,CDK2,CEBPB (includes EG:1051),CHD4,CREB1,ELF4,ELK1,EP300,ETS1,GATA1,HIF1A,HOXA9,HSP90AA1,HSP90B1,HSPD1,IGF1R,IRF1 (includes EG:16362),IRF2,MAF,MYB,NFATC1,PARP1,PNP,PRKDC,RAD52 (includes EG:19365),RORA,RPL22,RPS6,SATB1,SP3,SRF,STAT1,STAT3,STAT5A,TP53 (includes EG:22059),WT1,XRCC4,XRCC5,ZFPM1	43
Cell-mediated Immune Response	development	T cell development	4,37E-05	ANXA1,AP3D1,BAX,BLM,BRCA1,CDK2,CEBPB (includes EG:1051),CHD4,CREB1,ELF4,ELK1,EP300,ETS1,GATA1,HIF1A,HOXA9,HSP90AA1,HSP90B1,HSPD1,IGF1R,IRF1 (includes EG:16362),IRF2,MAF,MYB,NFATC1,PARP1,PNP,PRKDC,RAD52 (includes EG:19365),RORA,RPL22,RPS6,SATB1,SP3,SRF,STAT1,STAT3,STAT5A,TP53 (includes EG:22059),WT1,XRCC4,XRCC5,ZFPM1	43
DNA Replication, Recombination, and Repair	annealing	annealing	4,38E-05	ETV6,HNRNPA1,HNRNPC,HNRNPU,TP53 (includes EG:22059)	5
Cell Death	cell death	cell death of epithelial cells	4,44E-05	AR,BAX,CEBPD,CFLAR,ESR1,FOS,FOXF2,HSPA5,HTT,IKBKG,JUN,KRT8,MDM2,MKL1,NPM1,NR3C1,NR5A1,PARP1,PIAS4,RB1,STAT3,TP53 (includes EG:22059),TP63	23
Protein Synthesis	translation	translation of protein	4,59E-05	APP,DHX9,EIF2AK2,EIF2S1,EIF4A1,GSK3B,HNRNPK,PCBP1,PPP1CA,PTBP1,RARA,RPL27A,RPS3,RPS6,SNRNP70,SSB,TP53 (includes EG:22059)	17
Cancer	tumorigenesis	tumorigenesis of carcinoma	4,59E-05	ANXA1,BRCA1,CDK2,ESR1,MAML1,MDM2,MDM4,NFKBIA,PPARA,PPARG,RB1,SMAD4,STAT3,TP53 (includes EG:22059),TPR,VHL,XPC	17
Cell Death	apoptosis	apoptosis of parenchymal cells	4,66E-05	ATF7,BAX,DAXX,GSK3B,HSPA5,IKBKG,IRF1 (includes EG:16362),JUN,KRT8,PTPN1,RB1,STAT3,TP53 (includes EG:22059),XBP1 (includes EG:140614)	14
Cellular Growth and Proliferation	proliferation	proliferation of epithelial cells	4,73E-05	AR,BAX,BRCA1,CDK2,CEBPB (includes EG:1051),ESR1,FOXF2,HSF4,HTT,IGF1R,JUP,KRT10,MAPKAPK2,MKI67,NCOA2,NFKBIA,NR3C1,PGR (includes EG:18667),POU3F2,RB1,RXRA,SMAD4,STAT3,STAT5A,TBX1,TP53 (includes EG:22059),TP63,VHL,YAP1 (includes EG:10413)	29
Cell Cycle	G1/S phase transition	G1/S phase	4,77E-05	CDK2,EIF2AK2,EP300,GPI,IGF1R,IRF1 (includes EG:16362),JUN,MYB,MYOCD,NFATC1,NFKBIA,PPARA,RB1,RPS6,STAT3,TP53 (includes EG:22059)	16
Cell Cycle	senescence	senescence of cells	4,81E-05	AHCY,APP,ARID3A,CDK2,CEBPB (includes EG:1051),ELF4,GPI,KDM2B,PML,RB1,SIRT1,TP53 (includes EG:22059),TP73,VHL,WT1	15
Organismal Development	development	arrest in development of organism	4,87E-05	CREB1,DNMT1,PES1,PRKDC,RNF2,TFAP2C,TRIM24	7
Molecular Transport	nuclear export	nuclear export	4,87E-05	GSK3B,HSPA9,KHDRBS1,NPM1,NUP160,XPO1,XPO5	7
Cancer	hyperproliferation	hyperproliferation	4,88E-05	AR,BAX,BRCA1,CASP2,CDK2,CEBPB (includes EG:1051),DSC1,ESR1,FOS,IGF1R,IKBKG,KRT17,MAML1,MYB,NCOA1,NCOA3,NFKB2,NFKBIA,NR1H2,PGR (includes EG:18667),PPARG,PPIA,PRKDC,RB1,RORA,RXRA,SMAD4,SOD1,STAT3,TP53 (includes EG:22059),TPR,VASP,WDR77,XPC	34
Cell Death	apoptosis	apoptosis of T lymphocytes	5,04E-05	BAX,BRCA1,CDK2,CFLAR,FOS,HIST1H1C,HOXA9,IKBKE,JUN,MDM2,NFKBIA,NR3C1,NR5A1,PARP1,PDIA3,PNP,PRKDC,RPS6,SATB1,STAT1,STAT3,STAT5A,TOP2A,TP53 (includes EG:22059),TP73	25
Cell Death	cell death	cell death of hematopoietic progenitor cells	5,13E-05	BAX,BRCA1,CASP2,CDK2,FOS,GATA1,HDAC1,HIPK2,HIST1H1C,JUN,MDM2,NR3C1,NR5A1,PARP1,PRKDC,RB1,SATB1,STAT5A,TOP2A,TP53 (includes EG:22059),TP73,XRCC5	22
Cellular Development	development	development of lymphocytes	5,35E-05	ANXA1,AP3D1,BAX,BLM,BRCA1,CDK2,CEBPB (includes EG:1051),CHD4,CREB1,ELF4,ELK1,EP300,ETS1,FOS,FUS,GATA1,HIF1A,HOXA9,HSP90AA1,HSP90B1,HSPD1,IGF1R,IKBKG,IRF1 (includes EG:16362),IRF2,MAF,MYB,NFATC1,NFKB2,PARP1,PNP,PRKDC,RAD52 (includes EG:19365),RORA,RPL22,RPS6,SATB1,SP3,SRF,STAT1,STAT3,STAT5A,TP53 (includes EG:22059),WT1,XRCC4,XRCC5,ZFPM1	47
Hematological System Development and Function	development	development of lymphocytes	5,35E-05	ANXA1,AP3D1,BAX,BLM,BRCA1,CDK2,CEBPB (includes EG:1051),CHD4,CREB1,ELF4,ELK1,EP300,ETS1,FOS,FUS,GATA1,HIF1A,HOXA9,HSP90AA1,HSP90B1,HSPD1,IGF1R,IKBKG,IRF1 (includes EG:16362),IRF2,MAF,MYB,NFATC1,NFKB2,PARP1,PNP,PRKDC,RAD52 (includes EG:19365),RORA,RPL22,RPS6,SATB1,SP3,SRF,STAT1,STAT3,STAT5A,TP53 (includes EG:22059),WT1,XRCC4,XRCC5,ZFPM1	47
Hematopoiesis	development	development of lymphocytes	5,35E-05	ANXA1,AP3D1,BAX,BLM,BRCA1,CDK2,CEBPB (includes EG:1051),CHD4,CREB1,ELF4,ELK1,EP300,ETS1,FOS,FUS,GATA1,HIF1A,HOXA9,HSP90AA1,HSP90B1,HSPD1,IGF1R,IKBKG,IRF1 (includes EG:16362),IRF2,MAF,MYB,NFATC1,NFKB2,PARP1,PNP,PRKDC,RAD52 (includes EG:19365),RORA,RPL22,RPS6,SATB1,SP3,SRF,STAT1,STAT3,STAT5A,TP53 (includes EG:22059),WT1,XRCC4,XRCC5,ZFPM1	47
Lymphoid Tissue Structure and Development	development	development of lymphocytes	5,35E-05	ANXA1,AP3D1,BAX,BLM,BRCA1,CDK2,CEBPB (includes EG:1051),CHD4,CREB1,ELF4,ELK1,EP300,ETS1,FOS,FUS,GATA1,HIF1A,HOXA9,HSP90AA1,HSP90B1,HSPD1,IGF1R,IKBKG,IRF1 (includes EG:16362),IRF2,MAF,MYB,NFATC1,NFKB2,PARP1,PNP,PRKDC,RAD52 (includes EG:19365),RORA,RPL22,RPS6,SATB1,SP3,SRF,STAT1,STAT3,STAT5A,TP53 (includes EG:22059),WT1,XRCC4,XRCC5,ZFPM1	47
DNA Replication, Recombination, and Repair	degradation	degradation of DNA	5,43E-05	APP,BAX,EIF2AK2,FEN1,HNRNPA1,KRT8,LMNA,PARP1,PPIA,PPP1CC,SNCA,SOD1,TOP1,TOP2A,TP53 (includes EG:22059),WRN	16
Cancer	tumorigenesis	tumorigenesis of squamous cell tumor	5,47E-05	CDK2,FOS,MAML1,MDM2,NFKBIA,SMAD4,TP53 (includes EG:22059),XPC	8
Cellular Development	differentiation	differentiation of leukocytes	5,63E-05	ANXA1,AP3D1,BACH2,BLM,CEBPB (includes EG:1051),CEBPE,CTBP1,ELK1,ESR1,ETS1,FOS,GATA1,HOXA9,HSP90AA1,HSP90B1,HSPD1,IGF1R,IRF1 (includes EG:16362),IRF2,JUN,MAF,MEF2C,MSH2,MYB,NFATC1,NFKB2,NFKBIA,PARP1,PML,PNP,PPARG,PRKDC,RARA,RB1,RORA,RPL22,RPS6,SP3,STAT1,STAT3,STAT5A,TP53 (includes EG:22059),XBP1 (includes EG:140614),XRCC4,XRCC5,YY1,ZBTB16	47
Hematological System Development and Function	differentiation	differentiation of leukocytes	5,63E-05	ANXA1,AP3D1,BACH2,BLM,CEBPB (includes EG:1051),CEBPE,CTBP1,ELK1,ESR1,ETS1,FOS,GATA1,HOXA9,HSP90AA1,HSP90B1,HSPD1,IGF1R,IRF1 (includes EG:16362),IRF2,JUN,MAF,MEF2C,MSH2,MYB,NFATC1,NFKB2,NFKBIA,PARP1,PML,PNP,PPARG,PRKDC,RARA,RB1,RORA,RPL22,RPS6,SP3,STAT1,STAT3,STAT5A,TP53 (includes EG:22059),XBP1 (includes EG:140614),XRCC4,XRCC5,YY1,ZBTB16	47
Hematopoiesis	differentiation	differentiation of leukocytes	5,63E-05	ANXA1,AP3D1,BACH2,BLM,CEBPB (includes EG:1051),CEBPE,CTBP1,ELK1,ESR1,ETS1,FOS,GATA1,HOXA9,HSP90AA1,HSP90B1,HSPD1,IGF1R,IRF1 (includes EG:16362),IRF2,JUN,MAF,MEF2C,MSH2,MYB,NFATC1,NFKB2,NFKBIA,PARP1,PML,PNP,PPARG,PRKDC,RARA,RB1,RORA,RPL22,RPS6,SP3,STAT1,STAT3,STAT5A,TP53 (includes EG:22059),XBP1 (includes EG:140614),XRCC4,XRCC5,YY1,ZBTB16	47
Cell Cycle	recombination	DNA recombination	5,94E-05	BLM,BRCA1,DNMT1,FANCD2,MSH2,MSH6,PARP1,PRKDC,RAD52 (includes EG:19365),TP53 (includes EG:22059),WRN	11
DNA Replication, Recombination, and Repair	recombination	DNA recombination	5,94E-05	BLM,BRCA1,DNMT1,FANCD2,MSH2,MSH6,PARP1,PRKDC,RAD52 (includes EG:19365),TP53 (includes EG:22059),WRN	11
Cellular Function and Maintenance	autophagy	autophagy	6,06E-05	BAX,BRCA1,CASP2,EIF2AK2,EIF2S1,EP300,GSK3B,HSPA8,HTT,IKBKG,PPARG,RB1,SIRT1,SNCA,SOD1,TP53 (includes EG:22059),TP73,XBP1 (includes EG:140614)	18
Cell Morphology	autophagy	autophagy	6,06E-05	BAX,BRCA1,CASP2,EIF2AK2,EIF2S1,EP300,GSK3B,HSPA8,HTT,IKBKG,PPARG,RB1,SIRT1,SNCA,SOD1,TP53 (includes EG:22059),TP73,XBP1 (includes EG:140614)	18
Cancer	T-cell non-Hodgkin's disease	T-cell non-Hodgkin's disease	6,47E-05	BAX,CDK2,ETV6,MSH2,NFKBIA,PARP1,RAD52 (includes EG:19365),TP53 (includes EG:22059),TP73	9
Hematological Disease	T-cell non-Hodgkin's disease	T-cell non-Hodgkin's disease	6,47E-05	BAX,CDK2,ETV6,MSH2,NFKBIA,PARP1,RAD52 (includes EG:19365),TP53 (includes EG:22059),TP73	9
Cell Death	apoptosis	apoptosis of cortical neurons	6,47E-05	APP,BAX,CASP2,GSK3B,HSPA5,SIRT1,TP53 (includes EG:22059),TP63,TP73	9
Cell Cycle	cell cycle progression	cell cycle progression of fibroblasts	6,47E-05	FANCD2,HIF1A,IGF1R,MAP4,PLRG1,RB1,SKIL,TP53 (includes EG:22059),YY1	9
Connective Tissue Development and Function	cell cycle progression	cell cycle progression of fibroblasts	6,47E-05	FANCD2,HIF1A,IGF1R,MAP4,PLRG1,RB1,SKIL,TP53 (includes EG:22059),YY1	9
Cell Death	cell death	cell death of parenchymal cells	6,98E-05	ATF7,BAX,DAXX,FOS,GSK3B,HSPA5,IKBKG,IRF1 (includes EG:16362),JUN,KRT8,PTPN1,RB1,SLC25A6,STAT3,TP53 (includes EG:22059),XBP1 (includes EG:140614)	16
Cell Death	cell death	cell death of muscle cells	7,02E-05	ALDOA,APP,ATP2B4,DSP,EEF1D,HADHA,HK1,HK2,HSPD1,IGF1R,IKBKG,MAP3K1,MDH1,MDM2,MKI67,MKL1,PARP1,PLRG1,PPP1CC,RB1,SIRT1,SLK,SP1,TP53 (includes EG:22059),TP73	25
Cellular Development	maturation	maturation of bone marrow cells	7,26E-05	GATA1,NFE2,NPM1,RARA,ZBTB16,ZFPM1	6
Cancer	tumorigenesis	tumorigenesis of non-Hodgkin lymphoma	7,31E-05	CDK2,ETV6,MDM4,MSH2,NFKBIA,PTPN1,TP53 (includes EG:22059),XRCC5	8
Hematological Disease	tumorigenesis	tumorigenesis of non-Hodgkin lymphoma	7,31E-05	CDK2,ETV6,MDM4,MSH2,NFKBIA,PTPN1,TP53 (includes EG:22059),XRCC5	8
Immunological Disease	tumorigenesis	tumorigenesis of non-Hodgkin lymphoma	7,31E-05	CDK2,ETV6,MDM4,MSH2,NFKBIA,PTPN1,TP53 (includes EG:22059),XRCC5	8
Cancer	hyperplasia	hyperplasia of organ	7,40E-05	AR,BRCA1,CASP2,CDK2,CEBPB (includes EG:1051),ESR1,FOS,KRT17,MAML1,NFKB2,NFKBIA,NR1H2,PGR (includes EG:18667),PPARG,RB1,SMAD4,SOD1,TP53 (includes EG:22059),TPR,XPC	20
Cellular Development	differentiation	differentiation of tumor cell lines	8,37E-05	AXIN1,CDK2,CEBPB (includes EG:1051),ETV6,FLI1,GATA1,HNRNPA2B1,JUN,MEF2C,MYB,PPARG,PPIA,PRPF19,RARA,RPS3A,SGPL1,SMAD4,TP53 (includes EG:22059),WT1	19
Developmental Disorder	behavioral deficit	behavioral deficit	8,38E-05	APP,AR,GSK3B,HTT,SNCA	5
Neurological Disease	behavioral deficit	behavioral deficit	8,38E-05	APP,AR,GSK3B,HTT,SNCA	5
Psychological Disorders	behavioral deficit	behavioral deficit	8,38E-05	APP,AR,GSK3B,HTT,SNCA	5
Gene Expression	binding	binding of gene	8,38E-05	CREB1,EP300,JUN,PPARG,TP53 (includes EG:22059)	5
Molecular Transport	export	export of protein	8,38E-05	GSK3B,HSPA9,RAN,XPO1,XPO5	5
Protein Trafficking	export	export of protein	8,38E-05	GSK3B,HSPA9,RAN,XPO1,XPO5	5
Cellular Growth and Proliferation	proliferation	proliferation of trophoblast cells	8,38E-05	NCOA1,NCOA3,POU5F1,RB1,TFAP2C	5
Embryonic Development	proliferation	proliferation of trophoblast cells	8,38E-05	NCOA1,NCOA3,POU5F1,RB1,TFAP2C	5
Molecular Transport	transport	transport of protein	9,27E-05	AP3D1,ARNTL,GSK3B,HSPA9,HTT,IPO9,KPNB1,NFKBIA,PCNA,PML,RAB10,RAB1A,RAB2A,RAN,SPTBN1,TP53 (includes EG:22059),USO1,XPO1,XPO5	19
Protein Trafficking	transport	transport of protein	9,27E-05	AP3D1,ARNTL,GSK3B,HSPA9,HTT,IPO9,KPNB1,NFKBIA,PCNA,PML,RAB10,RAB1A,RAB2A,RAN,SPTBN1,TP53 (includes EG:22059),USO1,XPO1,XPO5	19
Immunological Disease	allergy	allergy	9,30E-05	ACTB,ALB,ALDOA,ARG1,ENO1,HSPA5,MYH9,PDIA3,PPARG,PPIA,PRDX1,TKT,TUBB	13
Cancer	lung cancer	lung cancer	9,36E-05	ALDOA,ALDOC,ENO1,EPAS1,FANCD2,GPI,HIF1A,IGF1R,IMPDH2,LDHA,PPARG,TP53 (includes EG:22059),TYMS,VHL,XPC	15
Respiratory Disease	lung cancer	lung cancer	9,36E-05	ALDOA,ALDOC,ENO1,EPAS1,FANCD2,GPI,HIF1A,IGF1R,IMPDH2,LDHA,PPARG,TP53 (includes EG:22059),TYMS,VHL,XPC	15
Genetic Disorder	lung cancer	lung cancer	9,36E-05	ALDOA,ALDOC,ENO1,EPAS1,FANCD2,GPI,HIF1A,IGF1R,IMPDH2,LDHA,PPARG,TP53 (includes EG:22059),TYMS,VHL,XPC	15
Post-Translational Modification	folding	folding of protein	9,76E-05	AARS,CANX,HSF1 (includes EG:15499),HSP90AA1,HSPA5,HSPA8,TCP1	7
Protein Folding	folding	folding of protein	9,76E-05	AARS,CANX,HSF1 (includes EG:15499),HSP90AA1,HSPA5,HSPA8,TCP1	7
DNA Replication, Recombination, and Repair	synthesis	synthesis of DNA	9,87E-05	APP,BRCA1,BRD4,CDK2,CREB1,ESR1,FEN1,HDAC1,HDGF,HNRNPA1,IGF1R,IRF1 (includes EG:16362),JUN,MAF,MAPKAPK2,MAZ,NFKBIA,PCNA,PGR (includes EG:18667),PML,PPARG,RB1,TP53 (includes EG:22059),TP63,TP73,TYMS,ZBTB7A	27
Cell Cycle	G2 phase	arrest in G2 phase	1,03E-04	BRCA1,EIF2AK2,FLNA,HDAC1,JUN,MSH2,PARP1,THOC1,TP53 (includes EG:22059),TP53BP1,XPC	11
Organismal Injury and Abnormalities	neurodegeneration	neurodegeneration of brain	1,04E-04	APP,ATXN7,CLCN7,CREB1,GSK3B,HTT,SIRT1,SNCA,STAT1	9
Neurological Disease	neurodegeneration	neurodegeneration of brain	1,04E-04	APP,ATXN7,CLCN7,CREB1,GSK3B,HTT,SIRT1,SNCA,STAT1	9
RNA Post-Transcriptional Modification	processing	processing of mRNA	1,04E-04	APP,HNRNPA1,HTT,KHDRBS1,NPM1,PCBP1,PRPF31,SF3B1,SRPK1	9
DNA Replication, Recombination, and Repair	assembly	assembly of chromosome components	1,08E-04	BAZ1B,BLM,DAXX,SMARCA5	4
Cellular Assembly and Organization	assembly	assembly of chromosome components	1,08E-04	BAZ1B,BLM,DAXX,SMARCA5	4
DNA Replication, Recombination, and Repair	breakdown	breakdown of chromosomes	1,08E-04	BRCA1,MSH2,TP53 (includes EG:22059),XRCC5	4
Cellular Compromise	breakdown	breakdown of chromosomes	1,08E-04	BRCA1,MSH2,TP53 (includes EG:22059),XRCC5	4
Cellular Response to Therapeutics	radiosensitivity	radiosensitivity of cells	1,08E-04	MSH2,PARP1,TP53 (includes EG:22059),XRCC4	4
Cancer	tumorigenesis	tumorigenesis of bone marrow cells	1,08E-04	RB1,STAT3,TP53 (includes EG:22059),VASP	4
Immunological Disease	tumorigenesis	tumorigenesis of bone marrow cells	1,08E-04	RB1,STAT3,TP53 (includes EG:22059),VASP	4
Cellular Development	differentiation	differentiation of bone marrow cells	1,16E-04	CTBP1,FLI1,GATA1,GSK3B,HIF1A,MEF2C,MYB,NFE2,NR5A1,PML,RARA,RB1,RCOR1,SP1,SP3,TP53 (includes EG:22059),ZFPM1	17
Hematopoiesis	differentiation	differentiation of bone marrow cells	1,16E-04	CTBP1,FLI1,GATA1,GSK3B,HIF1A,MEF2C,MYB,NFE2,NR5A1,PML,RARA,RB1,RCOR1,SP1,SP3,TP53 (includes EG:22059),ZFPM1	17
Cancer	mammary tumor	mammary tumor	1,16E-04	ANXA1,BRCA1,CDK2,ESR1,FANCD2,GSK3B,HIF1A,IGF1R,IGF2BP1,KRT14,MDM2,NCOA3,NFKBIA,POU5F1,PTPN1,RB1,TP53 (includes EG:22059)	17
Cellular Growth and Proliferation	colony formation	colony formation of fibroblast cell lines	1,18E-04	ATIC,CLTC,ETV6,FLI1,JUN,KHDRBS1,NPM1,PTPN1,RB1,SLC3A2,SMC3,TP73	12
Connective Tissue Development and Function	colony formation	colony formation of fibroblast cell lines	1,18E-04	ATIC,CLTC,ETV6,FLI1,JUN,KHDRBS1,NPM1,PTPN1,RB1,SLC3A2,SMC3,TP73	12
Lymphoid Tissue Structure and Development	development	development of lymphatic system component	1,21E-04	ADAR,AXIN1,BAX,BRCA1,CREB1,ETS1,ETV6,FLNA,FOS,HOXA9,IKBKG,IRF1 (includes EG:16362),MDM2,MDM4,MYB,NFATC1,NFKB2,NR5A1,PML,PPARG,PROX1,RARA,RPL22,SATB1,SRF,STAT1,TBX1,TP53 (includes EG:22059),WT1,ZFPM1	30
Cell Cycle	interphase	arrest in interphase of fibroblast cell lines	1,23E-04	BRCA1,GTF2I,JUN,LMNA,MDM2,MSH2,PARP1,PRKDC,RB1,SIRT1,TP53 (includes EG:22059)	11
Cell Cycle	cell cycle progression	cell cycle progression of fibroblast cell lines	1,23E-04	APP,ARID1B,BRD4,EP300,IRF1 (includes EG:16362),PPARG,PRMT1,RB1,SSRP1,TP53 (includes EG:22059),TP63	11
Connective Tissue Development and Function	cell cycle progression	cell cycle progression of fibroblast cell lines	1,23E-04	APP,ARID1B,BRD4,EP300,IRF1 (includes EG:16362),PPARG,PRMT1,RB1,SSRP1,TP53 (includes EG:22059),TP63	11
Cell Death	apoptosis	apoptosis of hepatocytes	1,24E-04	ATF7,BAX,DAXX,GSK3B,IKBKG,IRF1 (includes EG:16362),JUN,KRT8,PTPN1,RB1,STAT3,TP53 (includes EG:22059),XBP1 (includes EG:140614)	13
Gene Expression	binding	binding of DNA endogenous promoter	1,25E-04	CEBPB (includes EG:1051),CREB1,EP300,NR5A1,PPARG,STAT1,TP53 (includes EG:22059),YY1	8
Cancer	digestive organ tumor	digestive organ tumor	1,31E-04	CREB1,HIF1A,IGF1R,IKBKG,JUN,MDM2,MSH2,NCOA3,PDGFC,PML,PPARA,PPARG,RARA,RB1,RNF111,RRM2,SMAD4,SOD1,STAT3,TP53 (includes EG:22059)	20
Gastrointestinal Disease	digestive organ tumor	digestive organ tumor	1,31E-04	CREB1,HIF1A,IGF1R,IKBKG,JUN,MDM2,MSH2,NCOA3,PDGFC,PML,PPARA,PPARG,RARA,RB1,RNF111,RRM2,SMAD4,SOD1,STAT3,TP53 (includes EG:22059)	20
Cell Death	cell death	cell death of hepatocytes	1,36E-04	ATF7,BAX,DAXX,FOS,GSK3B,IKBKG,IRF1 (includes EG:16362),JUN,KRT8,PTPN1,RB1,SLC25A6,STAT3,TP53 (includes EG:22059),XBP1 (includes EG:140614)	15
Cancer	tumorigenesis	tumorigenesis of breast	1,45E-04	BRCA1,CDK2,CEBPB (includes EG:1051),ESR1,ETV4,NFKB2,PGR (includes EG:18667),RB1,SMAD4,TP53 (includes EG:22059)	10
Cell Cycle	G2/M phase	G2/M phase	1,46E-04	BRCA1,EIF2AK2,HDAC1,JUN,LMNA,MDC1,PARP1,RB1,THOC1,TP53 (includes EG:22059),TP53BP1	11
Small Molecule Biochemistry	binding	binding of hormone	1,47E-04	AR,ESR1,HSP90AB1,PGR (includes EG:18667),PTPN1	5
Endocrine System Development and Function	binding	binding of hormone	1,47E-04	AR,ESR1,HSP90AB1,PGR (includes EG:18667),PTPN1	5
DNA Replication, Recombination, and Repair	degradation	degradation of chromosomes	1,47E-04	BRCA1,MSH2,PRKDC,TP53 (includes EG:22059),XRCC5	5
Cellular Compromise	degradation	degradation of chromosomes	1,47E-04	BRCA1,MSH2,PRKDC,TP53 (includes EG:22059),XRCC5	5
Embryonic Development	development	development of mammary lobuloalveolar unit	1,47E-04	AR,AXIN1,NR3C1,PGR (includes EG:18667),STAT5A	5
Organ Development	development	development of mammary lobuloalveolar unit	1,47E-04	AR,AXIN1,NR3C1,PGR (includes EG:18667),STAT5A	5
Organismal Development	development	development of mammary lobuloalveolar unit	1,47E-04	AR,AXIN1,NR3C1,PGR (includes EG:18667),STAT5A	5
Tissue Development	development	development of mammary lobuloalveolar unit	1,47E-04	AR,AXIN1,NR3C1,PGR (includes EG:18667),STAT5A	5
Reproductive System Development and Function	development	development of mammary lobuloalveolar unit	1,47E-04	AR,AXIN1,NR3C1,PGR (includes EG:18667),STAT5A	5
Cell Death	apoptosis	apoptosis of cortical precursor cells	1,49E-04	TP53 (includes EG:22059),TP63,TP73	3
Cell Cycle	S phase	entry into S phase of neurons	1,49E-04	APP,CDK2,RB1	3
Nervous System Development and Function	S phase	entry into S phase of neurons	1,49E-04	APP,CDK2,RB1	3
Cancer	neoplasia	neoplasia of epithelial tissue	1,49E-04	AR,RB1,TP53 (includes EG:22059)	3
Cardiovascular Disease	cardiomyopathy	cardiomyopathy	1,53E-04	ACTC1,CREB1,IGF1R,IKBKG,LMNA,MDM4,MYH9,PDGFC,PPARA,PPARG,PPP1CA,RXRA,VCL,VHL,ZMPSTE24	15
Carbohydrate Metabolism	glycolysis	glycolysis	1,61E-04	HDAC4,HIF1A,HK1,HK2,PGK1,PKLR,PKM2,SREBF1	8
Cell Death	cell viability	cell viability of fibroblasts	1,64E-04	BRCA1,FOS,LMNA,TP53 (includes EG:22059),TP63,XRCC5	6
Connective Tissue Development and Function	cell viability	cell viability of fibroblasts	1,64E-04	BRCA1,FOS,LMNA,TP53 (includes EG:22059),TP63,XRCC5	6
Cancer	development	development of hepatocellular carcinoma	1,64E-04	JUN,PDGFC,PML,PPARA,RARA,STAT3	6
Organismal Injury and Abnormalities	neurodegeneration	neurodegeneration of hippocampus	1,64E-04	APP,CLCN7,CREB1,GSK3B,HTT,SIRT1	6
Neurological Disease	neurodegeneration	neurodegeneration of hippocampus	1,64E-04	APP,CLCN7,CREB1,GSK3B,HTT,SIRT1	6
Organismal Injury and Abnormalities	cytosis	cytosis	1,74E-04	APP,AR,CLCN7,EP300,EPAS1,ESR1,GATA1,GSK3B,HIF1A,HTT,MYB,NFE2,NFKBIA,S100A9,SNCA,SOD1,STAT3,VHL	18
Developmental Disorder	dysplasia	dysplasia	1,74E-04	APP,ESR1,KRT8,PML,PRKDC,RARA,RB1,RPSA,SMAD4,TP53 (includes EG:22059)	10
Cell Death	survival	survival of fibroblasts	1,74E-04	APEX1,BLM,CEBPD,FANCD2,JUN,MAP3K1,PLRG1,RAD52 (includes EG:19365),STAT3,TP53 (includes EG:22059)	10
Connective Tissue Development and Function	survival	survival of fibroblasts	1,74E-04	APEX1,BLM,CEBPD,FANCD2,JUN,MAP3K1,PLRG1,RAD52 (includes EG:19365),STAT3,TP53 (includes EG:22059)	10
Cellular Function and Maintenance	cytostasis	cytostasis of fibroblast cell lines	1,80E-04	CEBPB (includes EG:1051),GATA6,PLAG1,PLAGL2,PRDX1,SMC3,TP53 (includes EG:22059)	7
Connective Tissue Development and Function	cytostasis	cytostasis of fibroblast cell lines	1,80E-04	CEBPB (includes EG:1051),GATA6,PLAG1,PLAGL2,PRDX1,SMC3,TP53 (includes EG:22059)	7
Cancer	tumorigenesis	tumorigenesis of squamous-cell carcinoma	1,80E-04	CDK2,MAML1,MDM2,NFKBIA,SMAD4,TP53 (includes EG:22059),XPC	7
Cancer	transformation	transformation of fibroblast cell lines	1,84E-04	ATIC,BAX,CLTC,DNMT1,EEF1D,ETS1,ETV6,FLI1,FOS,G6PD,GPI,IGF1R,IRF1 (includes EG:16362),JUN,MDM2,NFKB2,NPM1,PRMT5,RB1,RPS3A,SMC3,STAT3,TP53 (includes EG:22059),TP73	24
Embryonic Development	development	development of placenta	1,89E-04	CDX2,CEBPB (includes EG:1051),EPAS1,HIF1A,HSF1 (includes EG:15499),HSP90AB1,PBRM1,PPARG,RPS6,SP1,SP3,TFAP2C,VHL	13
Organ Development	development	development of placenta	1,89E-04	CDX2,CEBPB (includes EG:1051),EPAS1,HIF1A,HSF1 (includes EG:15499),HSP90AB1,PBRM1,PPARG,RPS6,SP1,SP3,TFAP2C,VHL	13
Organismal Development	development	development of placenta	1,89E-04	CDX2,CEBPB (includes EG:1051),EPAS1,HIF1A,HSF1 (includes EG:15499),HSP90AB1,PBRM1,PPARG,RPS6,SP1,SP3,TFAP2C,VHL	13
Tissue Development	development	development of placenta	1,89E-04	CDX2,CEBPB (includes EG:1051),EPAS1,HIF1A,HSF1 (includes EG:15499),HSP90AB1,PBRM1,PPARG,RPS6,SP1,SP3,TFAP2C,VHL	13
Reproductive System Development and Function	development	development of placenta	1,89E-04	CDX2,CEBPB (includes EG:1051),EPAS1,HIF1A,HSF1 (includes EG:15499),HSP90AB1,PBRM1,PPARG,RPS6,SP1,SP3,TFAP2C,VHL	13
Hematological Disease	eosinophilia	eosinophilia	1,89E-04	ACTB,ALB,ALDOA,ARG1,ENO1,HSPA5,MYH9,PDIA3,PRDX1,RORA,STAT3,TKT,TUBB	13
Immunological Disease	eosinophilia	eosinophilia	1,89E-04	ACTB,ALB,ALDOA,ARG1,ENO1,HSPA5,MYH9,PDIA3,PRDX1,RORA,STAT3,TKT,TUBB	13
Hematological System Development and Function	quantity	quantity of blood cells	1,93E-04	APP,BAX,BLM,CBS,CEBPB (includes EG:1051),CFLAR,CREB1,DNMT1,ELF4,EP300,EPAS1,ETS1,ETV6,FERMT3,FLI1,FLNA,GATA1,HBZ,HIF1A,HOXA9,HSP90B1,HTT,IGF1R,IKBKG,IRF1 (includes EG:16362),IRF2,MAF,MAPKAPK2,MDM2,MSH2,MYB,NFATC1,NFE2,NFKB2,NFKBIA,NPM1,NR3C1,PABPC1,PDGFC,PML,PNP,PPARG,RARA,RB1,S100A9,SATB1,SIRT1,SNCA,SOD1,SREBF1,SRF,STAT1,STAT3,STAT5A,TP53 (includes EG:22059),XBP1 (includes EG:140614),ZBTB16	57
Tissue Morphology	quantity	quantity of blood cells	1,93E-04	APP,BAX,BLM,CBS,CEBPB (includes EG:1051),CFLAR,CREB1,DNMT1,ELF4,EP300,EPAS1,ETS1,ETV6,FERMT3,FLI1,FLNA,GATA1,HBZ,HIF1A,HOXA9,HSP90B1,HTT,IGF1R,IKBKG,IRF1 (includes EG:16362),IRF2,MAF,MAPKAPK2,MDM2,MSH2,MYB,NFATC1,NFE2,NFKB2,NFKBIA,NPM1,NR3C1,PABPC1,PDGFC,PML,PNP,PPARG,RARA,RB1,S100A9,SATB1,SIRT1,SNCA,SOD1,SREBF1,SRF,STAT1,STAT3,STAT5A,TP53 (includes EG:22059),XBP1 (includes EG:140614),ZBTB16	57
Cellular Function and Maintenance	organization	organization of nucleus	1,97E-04	BLM,CTCF (includes EG:10664),HTT,LMNA,NOLC1,PES1,SATB1,TP53 (includes EG:22059),YY1	9
Cellular Assembly and Organization	organization	organization of nucleus	1,97E-04	BLM,CTCF (includes EG:10664),HTT,LMNA,NOLC1,PES1,SATB1,TP53 (includes EG:22059),YY1	9
Developmental Disorder	dysplasia	dysplasia of organ	2,05E-04	APP,KRT8,PML,RARA,RB1,RPSA,SMAD4,TP53 (includes EG:22059)	8
Cell Death	apoptosis	apoptosis of cancer cells	2,08E-04	BAX,CASP2,EIF2AK2,FASN,IGF1R,IRF1 (includes EG:16362),JUN,MAP3K1,NFKBIA,PNP,RB1,STAT3,TP53 (includes EG:22059),VHL	14
Protein Synthesis	biosynthesis	biosynthesis of protein	2,20E-04	APP,DHX9,EEF2,EIF2AK2,EIF2S1,EIF4A1,GSK3B,HNRNPK,KRT17,PCBP1,PPP1CA,PTBP1,RARA,RPL27A,RPS3,RPS6,SNRNP70,SSB,TP53 (includes EG:22059)	19
Organismal Development	development	mammary gland development	2,21E-04	AR,AXIN1,BRCA1,CEBPB (includes EG:1051),CREB1,ESR1,HOXA9,IGF1R,NCOA1,NCOA2,NCOA3,NFKB2,NR3C1,PGR (includes EG:18667),STAT3,STAT5A	16
Tissue Development	development	mammary gland development	2,21E-04	AR,AXIN1,BRCA1,CEBPB (includes EG:1051),CREB1,ESR1,HOXA9,IGF1R,NCOA1,NCOA2,NCOA3,NFKB2,NR3C1,PGR (includes EG:18667),STAT3,STAT5A	16
Reproductive System Development and Function	development	mammary gland development	2,21E-04	AR,AXIN1,BRCA1,CEBPB (includes EG:1051),CREB1,ESR1,HOXA9,IGF1R,NCOA1,NCOA2,NCOA3,NFKB2,NR3C1,PGR (includes EG:18667),STAT3,STAT5A	16
Cell Death	cell death	cell death of liver	2,25E-04	ATF7,BAX,CEBPB (includes EG:1051),DAXX,FOS,GSK3B,HSPD1,IKBKG,IRF1 (includes EG:16362),IRF2,JUN,KRT8,PTPN1,RB1,RXRA,SLC25A6,SOD1,STAT3,TP53 (includes EG:22059),XBP1 (includes EG:140614)	20
Cell Cycle	G2/M phase transition	arrest in G2/M phase transition	2,35E-04	BRCA1,EIF2AK2,PARP1,THOC1,TP53 (includes EG:22059),TP53BP1	6
Cellular Function and Maintenance	endoplasmic reticulum stress response	endoplasmic reticulum stress response of cells	2,35E-04	ATP2A2,CEBPB (includes EG:1051),HSP90B1,PML,RARA,XBP1 (includes EG:140614)	6
Cellular Compromise	endoplasmic reticulum stress response	endoplasmic reticulum stress response of cells	2,35E-04	ATP2A2,CEBPB (includes EG:1051),HSP90B1,PML,RARA,XBP1 (includes EG:140614)	6
Cellular Function and Maintenance	length	length of telomeres	2,35E-04	HIF1A,HNRNPA1,PARP1,RB1,TP53 (includes EG:22059),XRCC5	6
Cellular Assembly and Organization	length	length of telomeres	2,35E-04	HIF1A,HNRNPA1,PARP1,RB1,TP53 (includes EG:22059),XRCC5	6
Molecular Transport	nuclear export	nuclear export of molecule	2,35E-04	GSK3B,HSPA9,KHDRBS1,NUP160,XPO1,XPO5	6
Dermatological Diseases and Conditions	alopecia	alopecia	2,39E-04	BAX,DLGAP3,DSC1,FOS,RXRA,SMAD4,ZMPSTE24	7
RNA Post-Transcriptional Modification	modification	modification of rRNA	2,41E-04	BOP1/LOC727967,DKC1,EBNA1BP2,FBL,RPS6	5
Cancer	osteosarcoma	osteosarcoma	2,41E-04	BAX,FOS,JUN,RB1,TP53 (includes EG:22059)	5
Skeletal and Muscular Disorders	osteosarcoma	osteosarcoma	2,41E-04	BAX,FOS,JUN,RB1,TP53 (includes EG:22059)	5
Cellular Growth and Proliferation	proliferation	proliferation of mammary epithelial cells	2,41E-04	BRCA1,CEBPB (includes EG:1051),IGF1R,SMAD4,STAT5A	5
Reproductive System Development and Function	proliferation	proliferation of mammary epithelial cells	2,41E-04	BRCA1,CEBPB (includes EG:1051),IGF1R,SMAD4,STAT5A	5
Cell Death	apoptosis	apoptosis of neural precursor cells	2,42E-04	BAX,TP53 (includes EG:22059),TP63,TP73	4
Organismal Injury and Abnormalities	gliosis	gliosis of tissue	2,42E-04	AR,HTT,SNCA,SOD1	4
Neurological Disease	gliosis	gliosis of tissue	2,42E-04	AR,HTT,SNCA,SOD1	4
DNA Replication, Recombination, and Repair	unwinding	unwinding of DNA	2,42E-04	BLM,MCM2,MCM4,MCM6	4
Cell Death	apoptosis	apoptosis of macrophages	2,46E-04	APP,CASP2,CEBPB (includes EG:1051),CFLAR,EIF2AK2,HIF1A,IRF1 (includes EG:16362),IRF2,NFKBIA,PARP1,PPARG,STAT1,TP53 (includes EG:22059)	13
Organismal Development	development	development of secretory structure	2,63E-04	ALDH1A2,AR,ARID5B,AXIN1,BRCA1,CEBPB (includes EG:1051),CREB1,ESR1,GATA6,HOXA9,IGF1R,NCOA1,NCOA2,NCOA3,NFKB2,NR3C1,NR5A1,ONECUT2,OTX1,PGR (includes EG:18667),PLAG1,POU3F2,RB1,STAT3,STAT5A,TBX1,TP63,WT1	28
DNA Replication, Recombination, and Repair	replication	DNA replication	2,73E-04	ABCB7,APP,BRCA1,FBL,FEN1,MCM2,NPM1,ORC5 (includes EG:26429),PARP1,PCNA,RB1,SP1,TOP1,TP53 (includes EG:22059),WRN,XRCC5	16
Embryonic Development	cardiogenesis	cardiogenesis	2,74E-04	ACADM,ACTC1,ALDH1A2,ATF7,BAZ1B,CFLAR,CTBP1,DSP,EP300,GATA6,HAND1,HIF1A,LECT1,MEF2C,MYH10,MYOCD,NFATC1,PBRM1,PDGFC,PRKDC,PROX1,RXRA,SALL1,SPTBN1,SRF,TBX1,VCL,WT1,ZFPM1,ZIC3	30
Organ Development	cardiogenesis	cardiogenesis	2,74E-04	ACADM,ACTC1,ALDH1A2,ATF7,BAZ1B,CFLAR,CTBP1,DSP,EP300,GATA6,HAND1,HIF1A,LECT1,MEF2C,MYH10,MYOCD,NFATC1,PBRM1,PDGFC,PRKDC,PROX1,RXRA,SALL1,SPTBN1,SRF,TBX1,VCL,WT1,ZFPM1,ZIC3	30
Organismal Development	cardiogenesis	cardiogenesis	2,74E-04	ACADM,ACTC1,ALDH1A2,ATF7,BAZ1B,CFLAR,CTBP1,DSP,EP300,GATA6,HAND1,HIF1A,LECT1,MEF2C,MYH10,MYOCD,NFATC1,PBRM1,PDGFC,PRKDC,PROX1,RXRA,SALL1,SPTBN1,SRF,TBX1,VCL,WT1,ZFPM1,ZIC3	30
Tissue Development	cardiogenesis	cardiogenesis	2,74E-04	ACADM,ACTC1,ALDH1A2,ATF7,BAZ1B,CFLAR,CTBP1,DSP,EP300,GATA6,HAND1,HIF1A,LECT1,MEF2C,MYH10,MYOCD,NFATC1,PBRM1,PDGFC,PRKDC,PROX1,RXRA,SALL1,SPTBN1,SRF,TBX1,VCL,WT1,ZFPM1,ZIC3	30
Cardiovascular System Development and Function	cardiogenesis	cardiogenesis	2,74E-04	ACADM,ACTC1,ALDH1A2,ATF7,BAZ1B,CFLAR,CTBP1,DSP,EP300,GATA6,HAND1,HIF1A,LECT1,MEF2C,MYH10,MYOCD,NFATC1,PBRM1,PDGFC,PRKDC,PROX1,RXRA,SALL1,SPTBN1,SRF,TBX1,VCL,WT1,ZFPM1,ZIC3	30
Infectious Disease	replication	replication of Retroviridae	2,93E-04	ANXA5,DHX9,HBZ,NFATC1,NFKBIA,PML,PPIA,PRDX1,TMPO	9
Neurological Disease	neurodegeneration	neurodegeneration	3,23E-04	APP,AR,ATXN1,ATXN7,CLCN7,CREB1,GSK3B,HTT,JUN,MAFG,PSMC1,SIRT1,SNCA,SOD1,SOX10,STAT1,TP53 (includes EG:22059)	17
Carbohydrate Metabolism	glycolysis	glycolysis of cells	3,28E-04	HDAC4,HIF1A,HK1,HK2,PGK1,PKM2	6
Cellular Development	growth	growth of keratinocytes	3,28E-04	FOS,JUN,KRT17,NR3C1,STAT3,TP63	6
Cellular Growth and Proliferation	growth	growth of keratinocytes	3,28E-04	FOS,JUN,KRT17,NR3C1,STAT3,TP63	6
Hair and Skin Development and Function	growth	growth of keratinocytes	3,28E-04	FOS,JUN,KRT17,NR3C1,STAT3,TP63	6
Protein Synthesis	translation	translation	3,36E-04	APP,DHX9,EEF2,EIF2AK2,EIF2S1,EIF4A1,GSK3B,HNRNPK,PCBP1,PPP1CA,PTBP1,RARA,RPL27A,RPS3,RPS6,SNRNP70,SSB,TP53 (includes EG:22059)	18
Tissue Development	development	development of connective tissue	3,39E-04	ADAR,ARID5B,BMP2K,CBS,DLX2,ESR1,ESRRG,ETV6,FLNA,FOS,FOSL2,G6PD,GATA1,GSK3B,HAND1,HDAC4,HIF1A,HSF1 (includes EG:15499),HSF4,JUN,MAFB,MDM2,MDM4,MEF2C,MEF2D,NAB1,NCOA2,NFATC1,NFE2,NFKB2,NFKBIA,NPM1,NR3C1,OTX1,PDGFC,PML,PPARG,RARA,RB1,RPS6,SATB2,SGPL1,SOX6,SP1,SP3,SREBF1,STAT1,TBX1,TP63,VHL,ZBTB16,ZFPM1,ZIC3	53
Cellular Development	differentiation	differentiation of cardiomyocytes	3,53E-04	ACADM,GATA6,GSK3B,MYOCD,RARA,RB1,RXRA,SMAD4,TBX1	9
Skeletal and Muscular System Development and Function	differentiation	differentiation of cardiomyocytes	3,53E-04	ACADM,GATA6,GSK3B,MYOCD,RARA,RB1,RXRA,SMAD4,TBX1	9
Cardiovascular System Development and Function	differentiation	differentiation of cardiomyocytes	3,53E-04	ACADM,GATA6,GSK3B,MYOCD,RARA,RB1,RXRA,SMAD4,TBX1	9
Cellular Growth and Proliferation	formation	formation of cells	3,55E-04	BAX,FLNA,FOS,GATA1,GSK3B,HIF1A,HSP90B1,IGF1R,MAFG,MAML1,MAPKAPK2,MEF2C,MSH6,MYB,NCOA1,NCOA2,NFATC1,NFE2,NFKB2,PPARG,RARA,SRF,STAT1,STIM1,TBX1,TP53 (includes EG:22059),TP63,VASP,XBP1 (includes EG:140614)	29
Organismal Development	vasculogenesis	vasculogenesis	3,70E-04	ALDH1A2,AMOT,ANXA2,APP,CBS,CTCF (includes EG:10664),EPAS1,ESR1,ETS1,ETV6,G6PD,GATA6,GSK3B,HIF1A,HSF1 (includes EG:15499),IGF1R,IKBKAP,JUN,LECT1,LEMD3,MDM4,MEF2C,MYOCD,NCOA1,NCOA3,NR5A1,PDGFC,PPARA,PPARG,PRKDC,PROX1,RB1,SGPL1,SMAD4,SRF,STAT5A,TBX1,TP53 (includes EG:22059),VHL,VIM,WARS,WT1,YAP1 (includes EG:10413)	43
Cardiovascular System Development and Function	vasculogenesis	vasculogenesis	3,70E-04	ALDH1A2,AMOT,ANXA2,APP,CBS,CTCF (includes EG:10664),EPAS1,ESR1,ETS1,ETV6,G6PD,GATA6,GSK3B,HIF1A,HSF1 (includes EG:15499),IGF1R,IKBKAP,JUN,LECT1,LEMD3,MDM4,MEF2C,MYOCD,NCOA1,NCOA3,NR5A1,PDGFC,PPARA,PPARG,PRKDC,PROX1,RB1,SGPL1,SMAD4,SRF,STAT5A,TBX1,TP53 (includes EG:22059),VHL,VIM,WARS,WT1,YAP1 (includes EG:10413)	43
Cell Death	cell death	cell death of germ cells	3,72E-04	BAX,BRCA1,CASP2,HSF2,NCOA1,NCOA2,PRKDC,TP53 (includes EG:22059),WT1,XRCC5,YY1	11
Cell Death	survival	survival of connective tissue cells	3,73E-04	APEX1,BLM,CEBPD,FANCD2,IGF1R,JUN,MAP3K1,PLRG1,PPARG,RAD52 (includes EG:19365),STAT3,TP53 (includes EG:22059)	12
DNA Replication, Recombination, and Repair	joining	joining of DNA	3,74E-04	BRCA1,ETV6,PDIA3,TP53 (includes EG:22059),XRCC4	5
Organismal Development	development	development of blood vessel	3,78E-04	ALDH1A2,AMOT,ANXA2,APP,CBS,CDX2,CTCF (includes EG:10664),DHCR7,EPAS1,ESR1,ETS1,ETV6,G6PD,GATA6,GATAD2A,GSK3B,HIF1A,HSF1 (includes EG:15499),IGF1R,IKBKAP,JUN,LECT1,LEMD3,MDM4,MEF2C,MYOCD,NCOA1,NCOA3,NR5A1,PDGFC,PGK1,PML,PPARA,PPARG,PRKDC,PROX1,RB1,SGPL1,SMAD4,SRF,STAT5A,TBX1,TP53 (includes EG:22059),VHL,VIM,WARS,WT1,YAP1 (includes EG:10413)	48
Cardiovascular System Development and Function	development	development of blood vessel	3,78E-04	ALDH1A2,AMOT,ANXA2,APP,CBS,CDX2,CTCF (includes EG:10664),DHCR7,EPAS1,ESR1,ETS1,ETV6,G6PD,GATA6,GATAD2A,GSK3B,HIF1A,HSF1 (includes EG:15499),IGF1R,IKBKAP,JUN,LECT1,LEMD3,MDM4,MEF2C,MYOCD,NCOA1,NCOA3,NR5A1,PDGFC,PGK1,PML,PPARA,PPARG,PRKDC,PROX1,RB1,SGPL1,SMAD4,SRF,STAT5A,TBX1,TP53 (includes EG:22059),VHL,VIM,WARS,WT1,YAP1 (includes EG:10413)	48
Cellular Compromise	damage	cell damage	3,99E-04	APP,AR,ARG1,ATXN1,BAX,GSK3B,HTT,IGF1R,IRF1 (includes EG:16362),KRT6A,KRT8,MSH6,NR4A2,PARP1,PPARA,PPARG,RRM2,SLC1A2,SNCA,SOD1,SREBF2,STAT3,TP53 (includes EG:22059)	23
Cell Death	apoptosis	apoptosis of embryonic stem cells	4,03E-04	BCAP31,DNMT3A,ETS1,HIF1A,MAP3K1,SRF,TP53 (includes EG:22059)	7
Embryonic Development	apoptosis	apoptosis of embryonic stem cells	4,03E-04	BCAP31,DNMT3A,ETS1,HIF1A,MAP3K1,SRF,TP53 (includes EG:22059)	7
Cell Cycle	cell cycle progression	arrest in cell cycle progression of fibroblast cell lines	4,03E-04	ARID1B,EP300,PPARG,RB1,SSRP1,TP53 (includes EG:22059),TP63	7
Connective Tissue Development and Function	cell cycle progression	arrest in cell cycle progression of fibroblast cell lines	4,03E-04	ARID1B,EP300,PPARG,RB1,SSRP1,TP53 (includes EG:22059),TP63	7
Hematological System Development and Function	hematopoiesis	hematopoiesis of bone marrow	4,03E-04	ADAR,ETV6,FLNA,MDM2,MDM4,PML,RARA	7
Hematopoiesis	hematopoiesis	hematopoiesis of bone marrow	4,03E-04	ADAR,ETV6,FLNA,MDM2,MDM4,PML,RARA	7
Connective Tissue Development and Function	hematopoiesis	hematopoiesis of bone marrow	4,03E-04	ADAR,ETV6,FLNA,MDM2,MDM4,PML,RARA	7
Tissue Development	hematopoiesis	hematopoiesis of bone marrow	4,03E-04	ADAR,ETV6,FLNA,MDM2,MDM4,PML,RARA	7
Skeletal and Muscular System Development and Function	hematopoiesis	hematopoiesis of bone marrow	4,03E-04	ADAR,ETV6,FLNA,MDM2,MDM4,PML,RARA	7
Lymphoid Tissue Structure and Development	hematopoiesis	hematopoiesis of bone marrow	4,03E-04	ADAR,ETV6,FLNA,MDM2,MDM4,PML,RARA	7
Inflammatory Disease	pneumonitis	pneumonitis	4,05E-04	ACTB,ALB,ALDOA,ARG1,ENO1,HSPA5,MYH9,PDIA3,PRDX1,STAT1,STAT3,TKT,TUBB	13
Respiratory Disease	pneumonitis	pneumonitis	4,05E-04	ACTB,ALB,ALDOA,ARG1,ENO1,HSPA5,MYH9,PDIA3,PRDX1,STAT1,STAT3,TKT,TUBB	13
Cell Death	apoptosis	apoptosis of germ cells	4,08E-04	BAX,BRCA1,CASP2,HSF2,NCOA1,NCOA2,PRKDC,TP53 (includes EG:22059),WT1,XRCC5	10
Cell Death	cell death	cell death of smooth muscle cells	4,08E-04	ALDOA,APP,ATP2B4,EEF1D,MDH1,MKI67,MKL1,PPP1CC,SP1,TP53 (includes EG:22059)	10
Cell Death	apoptosis	apoptosis of tumor cell lines	4,12E-04	ANXA2,APP,AR,ARG1,BRCA1,CFLAR,CTCF (includes EG:10664),G6PD,GATA1,HDAC1,HSP90AB1,HSPA5,IGF1R,IRF1 (includes EG:16362),MEF2C,NFKBIA,NR3C1,PLAGL2,POU5F1,PPARG,RXRA,STAT3,TP53 (includes EG:22059),TP73,WT1	25
Organismal Injury and Abnormalities	damage	damage of brain	4,23E-04	APP,BAX,CFLAR,HIF1A,HTT,PARK7,PPARG,SLC1A2,SOD1	9
Neurological Disease	damage	damage of brain	4,23E-04	APP,BAX,CFLAR,HIF1A,HTT,PARK7,PPARG,SLC1A2,SOD1	9
Cellular Development	differentiation	differentiation of mononuclear leukocytes	4,29E-04	ANXA1,AP3D1,BACH2,BLM,CEBPB (includes EG:1051),ELK1,ETS1,FOS,GATA1,HOXA9,HSP90AA1,HSP90B1,HSPD1,IGF1R,IRF1 (includes EG:16362),IRF2,JUN,MAF,MEF2C,MSH2,MYB,NFATC1,PARP1,PNP,PPARG,PRKDC,RORA,RPL22,RPS6,SP3,STAT1,STAT3,STAT5A,TP53 (includes EG:22059),XBP1 (includes EG:140614),XRCC4,XRCC5,YY1	38
Hematological System Development and Function	differentiation	differentiation of mononuclear leukocytes	4,29E-04	ANXA1,AP3D1,BACH2,BLM,CEBPB (includes EG:1051),ELK1,ETS1,FOS,GATA1,HOXA9,HSP90AA1,HSP90B1,HSPD1,IGF1R,IRF1 (includes EG:16362),IRF2,JUN,MAF,MEF2C,MSH2,MYB,NFATC1,PARP1,PNP,PPARG,PRKDC,RORA,RPL22,RPS6,SP3,STAT1,STAT3,STAT5A,TP53 (includes EG:22059),XBP1 (includes EG:140614),XRCC4,XRCC5,YY1	38
Hematopoiesis	differentiation	differentiation of mononuclear leukocytes	4,29E-04	ANXA1,AP3D1,BACH2,BLM,CEBPB (includes EG:1051),ELK1,ETS1,FOS,GATA1,HOXA9,HSP90AA1,HSP90B1,HSPD1,IGF1R,IRF1 (includes EG:16362),IRF2,JUN,MAF,MEF2C,MSH2,MYB,NFATC1,PARP1,PNP,PPARG,PRKDC,RORA,RPL22,RPS6,SP3,STAT1,STAT3,STAT5A,TP53 (includes EG:22059),XBP1 (includes EG:140614),XRCC4,XRCC5,YY1	38
Embryonic Development	formation	formation of embryonic tissue	4,38E-04	ALDH1A2,AR,AXIN1,FEN1,FOS,GATAD2A,HAND1,HIF1A,HTT,IFT172,IKBKAP,JUN,MAP3K1,MYH10,NFE2,SMAD4,SRF,STAT3,TBX1,TP63	20
Organismal Development	formation	formation of embryonic tissue	4,38E-04	ALDH1A2,AR,AXIN1,FEN1,FOS,GATAD2A,HAND1,HIF1A,HTT,IFT172,IKBKAP,JUN,MAP3K1,MYH10,NFE2,SMAD4,SRF,STAT3,TBX1,TP63	20
Tissue Development	formation	formation of embryonic tissue	4,38E-04	ALDH1A2,AR,AXIN1,FEN1,FOS,GATAD2A,HAND1,HIF1A,HTT,IFT172,IKBKAP,JUN,MAP3K1,MYH10,NFE2,SMAD4,SRF,STAT3,TBX1,TP63	20
Cell Death	apoptosis	apoptosis of breast cell lines	4,47E-04	CEBPD,ESR1,FOS,JUN,NFKBIA,TP53 (includes EG:22059)	6
Cell Cycle	cell cycle progression	arrest in cell cycle progression of fibroblasts	4,47E-04	FANCD2,MAP4,RB1,SKIL,TP53 (includes EG:22059),YY1	6
Connective Tissue Development and Function	cell cycle progression	arrest in cell cycle progression of fibroblasts	4,47E-04	FANCD2,MAP4,RB1,SKIL,TP53 (includes EG:22059),YY1	6
Cancer	bone cancer	bone cancer	4,47E-04	BAX,FOS,JUN,NPM1,RB1,TP53 (includes EG:22059)	6
Skeletal and Muscular Disorders	bone cancer	bone cancer	4,47E-04	BAX,FOS,JUN,NPM1,RB1,TP53 (includes EG:22059)	6
Cell Death	apoptosis	apoptosis of mucosa cells	4,64E-04	ESR1,HSF1 (includes EG:15499),RBBP4,TP53 (includes EG:22059)	4
Organismal Injury and Abnormalities	degeneration	degeneration of testis	4,64E-04	HTT,NCOA2,PRKDC,TRIM28	4
Reproductive System Disease	degeneration	degeneration of testis	4,64E-04	HTT,NCOA2,PRKDC,TRIM28	4
Cellular Assembly and Organization	development	development of nucleus	4,64E-04	CDK2,HTT,NOLC1,PES1	4
Protein Synthesis	expression	expression of reporter protein	4,64E-04	CREB1,MYBBP1A,NCOA2,PPARG	4
Cellular Growth and Proliferation	formation	formation of blood platelets	4,64E-04	GATA1,MAFG,MEF2C,STIM1	4
Hematological System Development and Function	formation	formation of blood platelets	4,64E-04	GATA1,MAFG,MEF2C,STIM1	4
Inflammatory Response	formation	formation of blood platelets	4,64E-04	GATA1,MAFG,MEF2C,STIM1	4
Cell Cycle	homologous recombination	homologous recombination of DNA	4,64E-04	BRCA1,PRKDC,RAD52 (includes EG:19365),TP53 (includes EG:22059)	4
DNA Replication, Recombination, and Repair	homologous recombination	homologous recombination of DNA	4,64E-04	BRCA1,PRKDC,RAD52 (includes EG:19365),TP53 (includes EG:22059)	4
Reproductive System Development and Function	lordosis	lordosis	4,64E-04	ESR1,NCOA1,NCOA2,PGR (includes EG:18667)	4
Cell Cycle	ploidy	ploidy of hematopoietic progenitor cells	4,64E-04	BAX,MYB,RB1,TP53 (includes EG:22059)	4
Cell Death	apoptosis	apoptosis of liver	4,65E-04	ATF7,BAX,CEBPB (includes EG:1051),DAXX,GSK3B,IKBKG,IRF1 (includes EG:16362),IRF2,JUN,KRT8,PTPN1,RB1,STAT3,TP53 (includes EG:22059),XBP1 (includes EG:140614)	15
Organismal Injury and Abnormalities	formation	formation of lesion	4,65E-04	CBS,DSC1,FOS,HSP90B1,IKBKG,KRT6A,MDM2,NR5A2,RB1,SMAD4,SNCA,SOD1,STAT3,TP53 (includes EG:22059),XBP1 (includes EG:140614)	15
Cell Death	apoptosis	apoptosis of epidermal cells	4,78E-04	CFLAR,IKBKG,JUN,NR3C1,PARP1,PIAS4,RB1,STAT3,TP53 (includes EG:22059),TP63	10
Nervous System Development and Function	development	development of central nervous system	4,79E-04	ALDH1A2,APP,BAX,CASP2,CBS,CREB1,DLX2,FOXG1,FOXJ3,HDAC1,HTT,IGF1R,MDM2,MDM4,MYH10,NR1H2,NR1H3,NR3C1,NR5A1,OTX1,POU3F2,POU3F3,PRKDC,RORA,SALL1,SATB2,SLC1A2,SOX10,SOX6,SPTBN1,SRF,TFAP2C,TOP2B,TP53 (includes EG:22059),TP73,VIM,XRCC4,ZBTB16,ZEB2,ZIC2,ZIC3	41
Infectious Disease	replication	replication of virus	4,80E-04	ADAR,ANXA5,BAX,DDX3X,DHX9,EIF2AK2,HBZ,HSP90AB1,IKBKE,NFATC1,NFKBIA,PML,PPARA,PPIA,PRDX1,RXRA,STAT1,TMPO,TP53 (includes EG:22059)	19
Cellular Movement	migration	migration of cells	4,86E-04	ACTN4,ALDOA,AMOT,ANXA1,ANXA2,ANXA5,APP,ARG1,ARID5B,BAX,CAP1,CAPN2,CBLL1,CEBPE,CSE1L,DAPK3,DDX3X,DLX2,ELF4,EPAS1,ESR1,ETS1,ETV6,FERMT3,GNB2L1,GSK3B,HDAC1,HIF1A,HSP90AA1,HSP90AB1,HSP90B1,HSPA5,HSPD1,HTT,IGF1R,IKBKG,KDM2B,KRT10,KRT6A,LMNA,MAFB,MAP3K1,MAPKAPK2,MCM2,MCM3,MPP1,MRC2,MYH10,MYH9,NFATC1,NFKB2,NFKBIA,NPM1,NR4A2,NRD1 (includes EG:230598),NUP85 (includes EG:287830),ONECUT2,PARK7,PARP1,PLCB3,P…	96
Cell Cycle	G2/M phase transition	G2/M phase transition	4,88E-04	BRCA1,EIF2AK2,HDAC1,PARP1,RB1,THOC1,TP53 (includes EG:22059),TP53BP1	8
Cell Cycle	ploidy	ploidy of cells	4,88E-04	BAX,MYB,PARP1,PRMT1,RB1,SREBF1,TP53 (includes EG:22059),YY1	8
Cancer	tumorigenesis	tumorigenesis of skin	4,94E-04	CEBPB (includes EG:1051),FOS,JUN,KRT10,KRT17,MAML1,NFKBIA,RB1,SMAD4,TP53 (includes EG:22059),XPC	11
Dermatological Diseases and Conditions	tumorigenesis	tumorigenesis of skin	4,94E-04	CEBPB (includes EG:1051),FOS,JUN,KRT10,KRT17,MAML1,NFKBIA,RB1,SMAD4,TP53 (includes EG:22059),XPC	11
Cellular Development	myogenesis	myogenesis of cells	5,04E-04	EMD,FOSL2,HDAC1,HIF1A,JUN,LEMD2,LEMD3,NFKBIA,RB1	9
Tissue Development	myogenesis	myogenesis of cells	5,04E-04	EMD,FOSL2,HDAC1,HIF1A,JUN,LEMD2,LEMD3,NFKBIA,RB1	9
Skeletal and Muscular System Development and Function	myogenesis	myogenesis of cells	5,04E-04	EMD,FOSL2,HDAC1,HIF1A,JUN,LEMD2,LEMD3,NFKBIA,RB1	9
Cellular Development	senescence	senescence of fibroblast cell lines	5,04E-04	AHCY,CDK2,CEBPB (includes EG:1051),KDM2B,RB1,SIRT1,TP53 (includes EG:22059),TP73,VHL	9
Cell Cycle	senescence	senescence of fibroblast cell lines	5,04E-04	AHCY,CDK2,CEBPB (includes EG:1051),KDM2B,RB1,SIRT1,TP53 (includes EG:22059),TP73,VHL	9
Connective Tissue Development and Function	senescence	senescence of fibroblast cell lines	5,04E-04	AHCY,CDK2,CEBPB (includes EG:1051),KDM2B,RB1,SIRT1,TP53 (includes EG:22059),TP73,VHL	9
Cancer	squamous cell tumor	squamous cell tumor	5,14E-04	ALB,ANXA1,CDK2,FOS,KRT13,MAML1,MDM2,NFKBIA,RB1,S100A9,SMAD4,STAT3,TP53 (includes EG:22059),USP25,XPC	15
Cellular Growth and Proliferation	formation	formation of blood cells	5,49E-04	GATA1,HIF1A,MAFG,MAPKAPK2,MEF2C,MYB,NFE2,NFKB2,STAT1,STIM1,TP63,XBP1 (includes EG:140614)	12
Cell Cycle	G1 phase	G1 phase of fibroblast cell lines	5,57E-04	BRCA1,EP300,GNB2L1,GPI,LMNA,MDM2,PRKDC,RB1,SIRT1,TP53 (includes EG:22059)	10
Connective Tissue Development and Function	G1 phase	G1 phase of fibroblast cell lines	5,57E-04	BRCA1,EP300,GNB2L1,GPI,LMNA,MDM2,PRKDC,RB1,SIRT1,TP53 (includes EG:22059)	10
Cell Death	apoptosis	apoptosis of osteoblasts	5,57E-04	AR,CEBPB (includes EG:1051),CREB1,ELK1,ESR1	5
Cell Cycle	duplication	duplication of centrosome	5,57E-04	BRCA1,CDK2,NPM1,TP53 (includes EG:22059),XPO1	5
DNA Replication, Recombination, and Repair	duplication	duplication of centrosome	5,57E-04	BRCA1,CDK2,NPM1,TP53 (includes EG:22059),XPO1	5
Cellular Assembly and Organization	duplication	duplication of centrosome	5,57E-04	BRCA1,CDK2,NPM1,TP53 (includes EG:22059),XPO1	5
Nucleic Acid Metabolism	biosynthesis	biosynthesis of purine nucleotide	5,67E-04	ATP5B,CYCS,HIF1A,HTT,IMPDH2,PARP1,PKM2,PNP,SIRT1,STAT3,TP53 (includes EG:22059)	11
Small Molecule Biochemistry	biosynthesis	biosynthesis of purine nucleotide	5,67E-04	ATP5B,CYCS,HIF1A,HTT,IMPDH2,PARP1,PKM2,PNP,SIRT1,STAT3,TP53 (includes EG:22059)	11
Cell Cycle	interphase	arrest in interphase of hematopoietic progenitor cells	5,72E-04	CDK2,FOS,GATA1	3
DNA Replication, Recombination, and Repair	assembly	assembly of chromatin	5,72E-04	BAZ1B,BLM,SMARCA5	3
Cellular Assembly and Organization	assembly	assembly of chromatin	5,72E-04	BAZ1B,BLM,SMARCA5	3
Gene Expression	binding	binding of p53 response element	5,72E-04	EP300,MDM2,TP53 (includes EG:22059)	3
Cell Death	degradation	degradation of neurons	5,72E-04	APP,HTT,STAT3	3
DNA Replication, Recombination, and Repair	modification	modification of genomic DNA	5,72E-04	DNMT1,DNMT3A,PARP1	3
DNA Replication, Recombination, and Repair	organization	organization of nucleoli	5,72E-04	HTT,NOLC1,PES1	3
Cellular Function and Maintenance	organization	organization of nucleoli	5,72E-04	HTT,NOLC1,PES1	3
Cellular Assembly and Organization	organization	organization of nucleoli	5,72E-04	HTT,NOLC1,PES1	3
Cellular Growth and Proliferation	proliferation	proliferation of melanoma cells	5,72E-04	FASN,POU3F2,PPARG	3
Tumor Morphology	proliferation	proliferation of melanoma cells	5,72E-04	FASN,POU3F2,PPARG	3
Tissue Development	quantity	quantity of desmosomes	5,72E-04	DSP,JUP,NR3C1	3
Cellular Assembly and Organization	quantity	quantity of desmosomes	5,72E-04	DSP,JUP,NR3C1	3
Cell-To-Cell Signaling and Interaction	quantity	quantity of desmosomes	5,72E-04	DSP,JUP,NR3C1	3
Cell Morphology	shape change	shape change of nucleus	5,72E-04	LMNA,LMNB1,ZMPSTE24	3
Hematological System Development and Function	development	development of bone marrow	5,76E-04	ADAR,ETV6,FLNA,FOS,MDM2,MDM4,NFATC1,NFKB2,PML,PPARG,RARA,STAT1,ZFPM1	13
Connective Tissue Development and Function	development	development of bone marrow	5,76E-04	ADAR,ETV6,FLNA,FOS,MDM2,MDM4,NFATC1,NFKB2,PML,PPARG,RARA,STAT1,ZFPM1	13
Tissue Development	development	development of bone marrow	5,76E-04	ADAR,ETV6,FLNA,FOS,MDM2,MDM4,NFATC1,NFKB2,PML,PPARG,RARA,STAT1,ZFPM1	13
Skeletal and Muscular System Development and Function	development	development of bone marrow	5,76E-04	ADAR,ETV6,FLNA,FOS,MDM2,MDM4,NFATC1,NFKB2,PML,PPARG,RARA,STAT1,ZFPM1	13
Lymphoid Tissue Structure and Development	development	development of bone marrow	5,76E-04	ADAR,ETV6,FLNA,FOS,MDM2,MDM4,NFATC1,NFKB2,PML,PPARG,RARA,STAT1,ZFPM1	13
Cell Death	apoptosis	apoptosis of thymocytes	5,80E-04	BAX,BRCA1,CDK2,FOS,HIST1H1C,JUN,NR3C1,NR5A1,PARP1,PRKDC,SATB1,TOP2A,TP53 (includes EG:22059),TP73	14
Organismal Survival	survival	survival of organism	5,84E-04	ACTC1,APEX1,AR,ARG1,BAX,CCNT2,CEBPB (includes EG:1051),CYCS,DNMT1,DSP,ELK3,FANCD2,FLI1,FOS,GSK3B,HSP90B1,HTT,IGF1R,IRF1 (includes EG:16362),IRF2,MAPKAPK2,MDM2,MDM4,MSH2,NCOA1,NCOA2,NFKBIA,NR5A1,PARP1,PNP,PPARG,PTPN1,RB1,SLC1A2,SNCA,SOD1,SP1,STAT1,STAT3,STAT5A,TFAP2C,TP53 (includes EG:22059),TP53BP1,XRCC5	44
Molecular Transport	internalization	internalization of protein	5,94E-04	AP2B1,HTT,IPO9,KPNB1,PML,RAN,SPTBN1,XPO1	8
Protein Trafficking	internalization	internalization of protein	5,94E-04	AP2B1,HTT,IPO9,KPNB1,PML,RAN,SPTBN1,XPO1	8
Embryonic Development	gastrulation	gastrulation of embryo	5,98E-04	DLD,HTT,RPS6,SMAD4,SRF,TP53 (includes EG:22059)	6
Organismal Development	gastrulation	gastrulation of embryo	5,98E-04	DLD,HTT,RPS6,SMAD4,SRF,TP53 (includes EG:22059)	6
Developmental Disorder	hypertrophy	hypertrophy	6,10E-04	ACTC1,AR,CREB1,EEF1D,EP300,EPAS1,ESR1,GATA6,GSK3B,HDAC4,HIF1A,HTT,JUN,MDM2,MKL1,NAB1,NFKBIA,NR3C1,NR3C2 (includes EG:110784),PARK7,PARP1,PDGFC,PGR (includes EG:18667),PPARA,PPARG,PPIA,RAB1A,RAB2A,SIRT1,SOD1,SP3,SREBF1,STAT3,TP53 (includes EG:22059)	34
Small Molecule Biochemistry	oxidation	oxidation of lipid	6,28E-04	ABCD3,ACADM,ACADVL,ADH5 (includes EG:11532),ALDH1A2,APP,CYCS,EPAS1,HADHA,NR4A2,PPARA,SIRT1,SLC27A2,SNCA,SREBF2	15
Energy Production	oxidation	oxidation of lipid	6,28E-04	ABCD3,ACADM,ACADVL,ADH5 (includes EG:11532),ALDH1A2,APP,CYCS,EPAS1,HADHA,NR4A2,PPARA,SIRT1,SLC27A2,SNCA,SREBF2	15
Lipid Metabolism	oxidation	oxidation of lipid	6,28E-04	ABCD3,ACADM,ACADVL,ADH5 (includes EG:11532),ALDH1A2,APP,CYCS,EPAS1,HADHA,NR4A2,PPARA,SIRT1,SLC27A2,SNCA,SREBF2	15
DNA Replication, Recombination, and Repair	formation	formation of chromosome components	6,45E-04	BAZ1B,BLM,BRCA1,CTCF (includes EG:10664),DAXX,SATB1,SMARCA5	7
Cellular Assembly and Organization	formation	formation of chromosome components	6,45E-04	BAZ1B,BLM,BRCA1,CTCF (includes EG:10664),DAXX,SATB1,SMARCA5	7
Cellular Growth and Proliferation	proliferation	proliferation of embryonic cells	6,63E-04	ARNTL,BRCA1,FOXG1,HDAC1,HIF1A,KRT8,NCOA1,NCOA3,POU5F1,PRPF19,RB1,SOX10,STAT1,STAT3,TBX1,TCOF1,TFAP2C,TP53 (includes EG:22059),TP63	19
Embryonic Development	proliferation	proliferation of embryonic cells	6,63E-04	ARNTL,BRCA1,FOXG1,HDAC1,HIF1A,KRT8,NCOA1,NCOA3,POU5F1,PRPF19,RB1,SOX10,STAT1,STAT3,TBX1,TCOF1,TFAP2C,TP53 (includes EG:22059),TP63	19
Organismal Development	development	development of exocrine gland	7,31E-04	AR,AXIN1,BRCA1,CEBPB (includes EG:1051),CREB1,ESR1,HOXA9,IGF1R,NCOA1,NCOA2,NCOA3,NFKB2,NR3C1,OTX1,PGR (includes EG:18667),STAT3,STAT5A	17
Tissue Development	development	development of exocrine gland	7,31E-04	AR,AXIN1,BRCA1,CEBPB (includes EG:1051),CREB1,ESR1,HOXA9,IGF1R,NCOA1,NCOA2,NCOA3,NFKB2,NR3C1,OTX1,PGR (includes EG:18667),STAT3,STAT5A	17
Cell Death	apoptosis	apoptosis of lymphoid organ	7,62E-04	BAX,BRCA1,CDK2,FOS,HIST1H1C,HSPA5,JUN,NR3C1,NR5A1,PARP1,PRKDC,SATB1,TOP2A,TP53 (includes EG:22059),TP73	15
Cellular Assembly and Organization	organization	organization of organelle	7,70E-04	ANXA2,AXIN1,BLM,CAPZB,CTCF (includes EG:10664),DSP,EPAS1,FLNA,HTT,KRT17,KRT6A,LMNA,MYH9,NOLC1,NUMA1,P4HA1,PES1,SATB1,SNCA,SOD1,SRF,TP53 (includes EG:22059),TUBB,VCL,VIM,YY1	26
Cellular Development	differentiation	differentiation of T lymphocytes	7,77E-04	ANXA1,AP3D1,BLM,CEBPB (includes EG:1051),ETS1,GATA1,HSP90AA1,HSP90B1,HSPD1,IGF1R,IRF1 (includes EG:16362),IRF2,MAF,MYB,NFATC1,PARP1,PNP,PRKDC,RORA,RPL22,RPS6,SP3,STAT1,STAT3,STAT5A,TP53 (includes EG:22059),XRCC4,XRCC5	28
Hematological System Development and Function	differentiation	differentiation of T lymphocytes	7,77E-04	ANXA1,AP3D1,BLM,CEBPB (includes EG:1051),ETS1,GATA1,HSP90AA1,HSP90B1,HSPD1,IGF1R,IRF1 (includes EG:16362),IRF2,MAF,MYB,NFATC1,PARP1,PNP,PRKDC,RORA,RPL22,RPS6,SP3,STAT1,STAT3,STAT5A,TP53 (includes EG:22059),XRCC4,XRCC5	28
Hematopoiesis	differentiation	differentiation of T lymphocytes	7,77E-04	ANXA1,AP3D1,BLM,CEBPB (includes EG:1051),ETS1,GATA1,HSP90AA1,HSP90B1,HSPD1,IGF1R,IRF1 (includes EG:16362),IRF2,MAF,MYB,NFATC1,PARP1,PNP,PRKDC,RORA,RPL22,RPS6,SP3,STAT1,STAT3,STAT5A,TP53 (includes EG:22059),XRCC4,XRCC5	28
Cellular Function and Maintenance	differentiation	differentiation of T lymphocytes	7,77E-04	ANXA1,AP3D1,BLM,CEBPB (includes EG:1051),ETS1,GATA1,HSP90AA1,HSP90B1,HSPD1,IGF1R,IRF1 (includes EG:16362),IRF2,MAF,MYB,NFATC1,PARP1,PNP,PRKDC,RORA,RPL22,RPS6,SP3,STAT1,STAT3,STAT5A,TP53 (includes EG:22059),XRCC4,XRCC5	28
Lymphoid Tissue Structure and Development	differentiation	differentiation of T lymphocytes	7,77E-04	ANXA1,AP3D1,BLM,CEBPB (includes EG:1051),ETS1,GATA1,HSP90AA1,HSP90B1,HSPD1,IGF1R,IRF1 (includes EG:16362),IRF2,MAF,MYB,NFATC1,PARP1,PNP,PRKDC,RORA,RPL22,RPS6,SP3,STAT1,STAT3,STAT5A,TP53 (includes EG:22059),XRCC4,XRCC5	28
Cell-mediated Immune Response	differentiation	differentiation of T lymphocytes	7,77E-04	ANXA1,AP3D1,BLM,CEBPB (includes EG:1051),ETS1,GATA1,HSP90AA1,HSP90B1,HSPD1,IGF1R,IRF1 (includes EG:16362),IRF2,MAF,MYB,NFATC1,PARP1,PNP,PRKDC,RORA,RPL22,RPS6,SP3,STAT1,STAT3,STAT5A,TP53 (includes EG:22059),XRCC4,XRCC5	28
Cell Cycle	G2 phase	G2 phase of fibroblast cell lines	7,86E-04	HDAC1,JUN,MSH2,PARP1,RB1,TP53 (includes EG:22059)	6
Connective Tissue Development and Function	G2 phase	G2 phase of fibroblast cell lines	7,86E-04	HDAC1,JUN,MSH2,PARP1,RB1,TP53 (includes EG:22059)	6
Cellular Development	differentiation	differentiation of trophoblast cells	7,86E-04	CDX2,POU5F1,PPARG,RXRA,SP1,SP3	6
Embryonic Development	differentiation	differentiation of trophoblast cells	7,86E-04	CDX2,POU5F1,PPARG,RXRA,SP1,SP3	6
DNA Replication, Recombination, and Repair	formation	formation of chromatin	7,99E-04	BAZ1B,BLM,CTCF (includes EG:10664),SATB1,SMARCA5	5
Cellular Assembly and Organization	formation	formation of chromatin	7,99E-04	BAZ1B,BLM,CTCF (includes EG:10664),SATB1,SMARCA5	5
Dermatological Diseases and Conditions	desquamation	desquamation	8,00E-04	MDM2,NCOA1,NCOA2,TP53 (includes EG:22059)	4
DNA Replication, Recombination, and Repair	double-stranded DNA break repair	double-stranded DNA break repair of cells	8,00E-04	PARP1,PRKDC,TP53BP1,XRCC5	4
Cellular Function and Maintenance	double-stranded DNA break repair	double-stranded DNA break repair of cells	8,00E-04	PARP1,PRKDC,TP53BP1,XRCC5	4
Cell Morphology	double-stranded DNA break repair	double-stranded DNA break repair of cells	8,00E-04	PARP1,PRKDC,TP53BP1,XRCC5	4
Molecular Transport	nuclear export	nuclear export of protein	8,00E-04	GSK3B,HSPA9,XPO1,XPO5	4
Protein Trafficking	nuclear export	nuclear export of protein	8,00E-04	GSK3B,HSPA9,XPO1,XPO5	4
Hematological System Development and Function	quantity	quantity of erythroblasts	8,00E-04	FLI1,GATA1,MAF,STAT5A	4
Hematopoiesis	quantity	quantity of erythroblasts	8,00E-04	FLI1,GATA1,MAF,STAT5A	4
Tissue Morphology	quantity	quantity of erythroblasts	8,00E-04	FLI1,GATA1,MAF,STAT5A	4
Cancer	tumorigenesis	tumorigenesis of hematopoietic progenitor cells	8,00E-04	RB1,STAT3,TP53 (includes EG:22059),VASP	4
Hematological Disease	tumorigenesis	tumorigenesis of hematopoietic progenitor cells	8,00E-04	RB1,STAT3,TP53 (includes EG:22059),VASP	4
Organismal Injury and Abnormalities	abnormal ratio tissue	abnormal ratio tissue	8,03E-04	CDX2,DNMT1,KRT17,MSH2,PPARG,SMAD4,TP53 (includes EG:22059)	7
Embryonic Development	development	development of embryonic tissue	8,08E-04	ALDH1A2,APP,AXIN1,BRCA1,EP300,FOSL2,FOXG1,GATA6,HAND1,HDAC1,HIF1A,HSP90B1,HTT,JUN,MAFB,MEF2C,NR5A1,OTX1,PBRM1,PFN1,RARA,RNF2,SALL1,SMAD4,SOX6,TBX1,TOP2B,TP53 (includes EG:22059),TP63,VASP,VCL,WT1,YAP1 (includes EG:10413),ZBTB16,ZFPM1,ZIC2	36
Organismal Development	development	development of embryonic tissue	8,08E-04	ALDH1A2,APP,AXIN1,BRCA1,EP300,FOSL2,FOXG1,GATA6,HAND1,HDAC1,HIF1A,HSP90B1,HTT,JUN,MAFB,MEF2C,NR5A1,OTX1,PBRM1,PFN1,RARA,RNF2,SALL1,SMAD4,SOX6,TBX1,TOP2B,TP53 (includes EG:22059),TP63,VASP,VCL,WT1,YAP1 (includes EG:10413),ZBTB16,ZFPM1,ZIC2	36
Tissue Development	development	development of embryonic tissue	8,08E-04	ALDH1A2,APP,AXIN1,BRCA1,EP300,FOSL2,FOXG1,GATA6,HAND1,HDAC1,HIF1A,HSP90B1,HTT,JUN,MAFB,MEF2C,NR5A1,OTX1,PBRM1,PFN1,RARA,RNF2,SALL1,SMAD4,SOX6,TBX1,TOP2B,TP53 (includes EG:22059),TP63,VASP,VCL,WT1,YAP1 (includes EG:10413),ZBTB16,ZFPM1,ZIC2	36
Cell Death	apoptosis	apoptosis of bone marrow cells	8,27E-04	BAX,CDK2,HDAC1,HOXA9,PARP1,PML,STAT1,STAT5A,TP53 (includes EG:22059)	9
Embryonic Development	development	development of thymus gland	8,38E-04	AXIN1,BAX,BRCA1,CREB1,ETS1,HOXA9,IRF1 (includes EG:16362),MYB,NFKB2,RPL22,SATB1,SRF,TBX1,TP53 (includes EG:22059),WT1	15
Organ Development	development	development of thymus gland	8,38E-04	AXIN1,BAX,BRCA1,CREB1,ETS1,HOXA9,IRF1 (includes EG:16362),MYB,NFKB2,RPL22,SATB1,SRF,TBX1,TP53 (includes EG:22059),WT1	15
Organismal Development	development	development of thymus gland	8,38E-04	AXIN1,BAX,BRCA1,CREB1,ETS1,HOXA9,IRF1 (includes EG:16362),MYB,NFKB2,RPL22,SATB1,SRF,TBX1,TP53 (includes EG:22059),WT1	15
Tissue Development	development	development of thymus gland	8,38E-04	AXIN1,BAX,BRCA1,CREB1,ETS1,HOXA9,IRF1 (includes EG:16362),MYB,NFKB2,RPL22,SATB1,SRF,TBX1,TP53 (includes EG:22059),WT1	15
Lymphoid Tissue Structure and Development	development	development of thymus gland	8,38E-04	AXIN1,BAX,BRCA1,CREB1,ETS1,HOXA9,IRF1 (includes EG:16362),MYB,NFKB2,RPL22,SATB1,SRF,TBX1,TP53 (includes EG:22059),WT1	15
Cell Death	cell death	cell death of liver cells	8,66E-04	ATF7,BAX,CEBPB (includes EG:1051),DAXX,FOS,GSK3B,HSPD1,IKBKG,IRF1 (includes EG:16362),JUN,KRT8,PTPN1,RB1,SLC25A6,STAT3,TP53 (includes EG:22059),XBP1 (includes EG:140614)	17
Cancer	liver tumor	liver tumor	8,75E-04	CREB1,HIF1A,IKBKG,JUN,MDM2,NCOA3,PDGFC,PML,PPARA,RARA,RRM2,SOD1,STAT3,TP53 (includes EG:22059)	14
Gastrointestinal Disease	liver tumor	liver tumor	8,75E-04	CREB1,HIF1A,IKBKG,JUN,MDM2,NCOA3,PDGFC,PML,PPARA,RARA,RRM2,SOD1,STAT3,TP53 (includes EG:22059)	14
Cell Cycle	M phase	M phase	8,86E-04	ACTN4,APP,CAPN2,CDK2,HDAC1,HSF1 (includes EG:15499),MSN,PES1,SIRT1,TP53 (includes EG:22059),VASP,YY1	12
Cell Death	apoptosis	apoptosis of B lymphocytes	8,86E-04	BAX,CASP2,CFLAR,IKBKE,MDM2,MSH2,NFATC1,NFKB2,NFKBIA,SKIL,TP53 (includes EG:22059),XRCC5	12
Cellular Growth and Proliferation	colony formation	colony formation	9,03E-04	ATIC,CLTC,ESR1,ETV6,FLI1,HOXA9,IGF1R,JUN,KHDRBS1,NFE2,NPM1,PML,PTPN1,RB1,RUVBL1,RUVBL2,SLC3A2,SMC3,SOD1,TP53 (includes EG:22059),TP73,WT1,XBP1 (includes EG:140614)	23
Connective Tissue Development and Function	development	development of bone	9,30E-04	ADAR,ARID5B,BMP2K,CBS,ESR1,ESRRG,ETV6,FLNA,FOS,FOSL2,GATA1,HDAC4,HIF1A,HSF1 (includes EG:15499),HSF4,JUN,MAFB,MDM2,MDM4,MEF2C,MEF2D,NAB1,NCOA2,NFATC1,NFE2,NFKB2,NFKBIA,NPM1,NR3C1,OTX1,PDGFC,PML,PPARG,RARA,SATB2,SGPL1,SOX6,SP1,SP3,STAT1,TBX1,TP63,VHL,ZBTB16,ZFPM1,ZIC3	46
Tissue Development	development	development of bone	9,30E-04	ADAR,ARID5B,BMP2K,CBS,ESR1,ESRRG,ETV6,FLNA,FOS,FOSL2,GATA1,HDAC4,HIF1A,HSF1 (includes EG:15499),HSF4,JUN,MAFB,MDM2,MDM4,MEF2C,MEF2D,NAB1,NCOA2,NFATC1,NFE2,NFKB2,NFKBIA,NPM1,NR3C1,OTX1,PDGFC,PML,PPARG,RARA,SATB2,SGPL1,SOX6,SP1,SP3,STAT1,TBX1,TP63,VHL,ZBTB16,ZFPM1,ZIC3	46
Skeletal and Muscular System Development and Function	development	development of bone	9,30E-04	ADAR,ARID5B,BMP2K,CBS,ESR1,ESRRG,ETV6,FLNA,FOS,FOSL2,GATA1,HDAC4,HIF1A,HSF1 (includes EG:15499),HSF4,JUN,MAFB,MDM2,MDM4,MEF2C,MEF2D,NAB1,NCOA2,NFATC1,NFE2,NFKB2,NFKBIA,NPM1,NR3C1,OTX1,PDGFC,PML,PPARG,RARA,SATB2,SGPL1,SOX6,SP1,SP3,STAT1,TBX1,TP63,VHL,ZBTB16,ZFPM1,ZIC3	46
Infectious Disease	replication	replication of RNA virus	9,40E-04	ADAR,ANXA5,BAX,DDX3X,DHX9,EIF2AK2,HBZ,HSP90AB1,IKBKE,NFATC1,NFKBIA,PML,PPIA,PRDX1,TMPO,TP53 (includes EG:22059)	16
Cell Cycle	S phase	S phase	9,42E-04	ANP32B,APP,BRCA1,CDK2,CEBPB (includes EG:1051),DDX3X,FOS,GATA6,GTF2I,JUN,LMNA,MDM2,PARP1,PPARG,RB1,TP53 (includes EG:22059),XRCC5	17
Cell Death	apoptosis	apoptosis of liver cells	9,66E-04	ATF7,BAX,CEBPB (includes EG:1051),DAXX,GSK3B,IKBKG,IRF1 (includes EG:16362),JUN,KRT8,PTPN1,RB1,STAT3,TP53 (includes EG:22059),XBP1 (includes EG:140614)	14
Cancer	squamous-cell carcinoma	squamous-cell carcinoma	9,66E-04	ALB,ANXA1,CDK2,KRT13,MAML1,MDM2,NFKBIA,RB1,S100A9,SMAD4,STAT3,TP53 (includes EG:22059),USP25,XPC	14
Cell Death	apoptosis	apoptosis of smooth muscle cells	9,67E-04	ALDOA,ATP2B4,EEF1D,MDH1,MKI67,MKL1,PPP1CC,SP1,TP53 (includes EG:22059)	9
Cell Cycle	G0 phase	G0 phase	9,91E-04	CEBPD,DAXX,EIF2AK2,FOS,GNB2L1,STAT1,TP53 (includes EG:22059)	7
Cell Death	cell death	cell death of sympathetic neuron	9,91E-04	APP,BAX,CASP2,CYCS,JUN,MAP3K1,TP53 (includes EG:22059)	7
Cellular Development	differentiation	differentiation of fibroblasts	9,91E-04	CCNT2,CEBPB (includes EG:1051),CREB1,MAML1,POU5F1,PPARG,YY1	7
Connective Tissue Development and Function	differentiation	differentiation of fibroblasts	9,91E-04	CCNT2,CEBPB (includes EG:1051),CREB1,MAML1,POU5F1,PPARG,YY1	7
Gene Expression	induction	induction of RNA	9,91E-04	CREB1,FOS,JUN,MAP3K1,NR3C1,STAT1,STAT3	7
Tissue Development	morphogenesis	morphogenesis of muscle	9,91E-04	ACTC1,ARID5B,HAND1,PROX1,RXRA,TBX1,ZFPM1	7
Skeletal and Muscular System Development and Function	morphogenesis	morphogenesis of muscle	9,91E-04	ACTC1,ARID5B,HAND1,PROX1,RXRA,TBX1,ZFPM1	7
Cellular Assembly and Organization	morphology	morphology of mitochondria	9,91E-04	APP,BAX,DNM1L,EPAS1,HK2,MAP3K1,VDAC3	7
Cell Morphology	morphology	morphology of mitochondria	9,91E-04	APP,BAX,DNM1L,EPAS1,HK2,MAP3K1,VDAC3	7
Cancer	liver cancer	liver cancer	9,94E-04	CREB1,HIF1A,IKBKG,JUN,MDM2,PDGFC,PML,PPARA,RARA,RRM2,SOD1,STAT3,TP53 (includes EG:22059)	13
Gastrointestinal Disease	liver cancer	liver cancer	9,94E-04	CREB1,HIF1A,IKBKG,JUN,MDM2,PDGFC,PML,PPARA,RARA,RRM2,SOD1,STAT3,TP53 (includes EG:22059)	13
Hepatic System Disease	liver cancer	liver cancer	9,94E-04	CREB1,HIF1A,IKBKG,JUN,MDM2,PDGFC,PML,PPARA,RARA,RRM2,SOD1,STAT3,TP53 (includes EG:22059)	13
Cell Death	apoptosis	apoptosis of sympathetic neuron	1,02E-03	BAX,CASP2,CYCS,JUN,MAP3K1,TP53 (includes EG:22059)	6
Organismal Injury and Abnormalities	hyperkeratosis	hyperkeratosis	1,02E-03	KRT10,MDM2,RARA,RB1,STAT1,TP53 (includes EG:22059)	6
Dermatological Diseases and Conditions	hyperkeratosis	hyperkeratosis	1,02E-03	KRT10,MDM2,RARA,RB1,STAT1,TP53 (includes EG:22059)	6
Small Molecule Biochemistry	binding	binding of lipid	1,03E-03	APP,ESR1,HSP90AB1,MAP4,NR3C1,PGR (includes EG:18667),PTPN1,RPSA	8
Lipid Metabolism	binding	binding of lipid	1,03E-03	APP,ESR1,HSP90AB1,MAP4,NR3C1,PGR (includes EG:18667),PTPN1,RPSA	8
Cell Death	survival	survival of brain cells	1,03E-03	APP,BAX,HTT,IGF1R,JUN,PARK7,RB1,TP53 (includes EG:22059)	8
Cellular Function and Maintenance	cytostasis	cytostasis of connective tissue cells	1,11E-03	CASP2,JUN,SAFB,STAT1,TP53 (includes EG:22059)	5
Cancer	tumorigenesis	tumorigenesis of T-cell non-Hodgkin lymphoma	1,11E-03	CDK2,ETV6,MSH2,NFKBIA,TP53 (includes EG:22059)	5
Hematological Disease	tumorigenesis	tumorigenesis of T-cell non-Hodgkin lymphoma	1,11E-03	CDK2,ETV6,MSH2,NFKBIA,TP53 (includes EG:22059)	5
Immunological Disease	tumorigenesis	tumorigenesis of T-cell non-Hodgkin lymphoma	1,11E-03	CDK2,ETV6,MSH2,NFKBIA,TP53 (includes EG:22059)	5
Cell Death	survival	survival of neurons	1,12E-03	APP,BAX,CREB1,FOXG1,GSK3B,HDGF,HTT,IGF1R,JUN,NFKBIA,PARK7,PDIA3,RB1,SIRT1,SLC1A2,TP53 (includes EG:22059)	16
Nervous System Development and Function	survival	survival of neurons	1,12E-03	APP,BAX,CREB1,FOXG1,GSK3B,HDGF,HTT,IGF1R,JUN,NFKBIA,PARK7,PDIA3,RB1,SIRT1,SLC1A2,TP53 (includes EG:22059)	16
Embryonic Development	development	development of liver	1,22E-03	ACADM,ATF7,GATA6,JUN,MDM4,ONECUT2,RB1,SP1,SP3,SPTBN1,XBP1 (includes EG:140614)	11
Organ Development	development	development of liver	1,22E-03	ACADM,ATF7,GATA6,JUN,MDM4,ONECUT2,RB1,SP1,SP3,SPTBN1,XBP1 (includes EG:140614)	11
Organismal Development	development	development of liver	1,22E-03	ACADM,ATF7,GATA6,JUN,MDM4,ONECUT2,RB1,SP1,SP3,SPTBN1,XBP1 (includes EG:140614)	11
Tissue Development	development	development of liver	1,22E-03	ACADM,ATF7,GATA6,JUN,MDM4,ONECUT2,RB1,SP1,SP3,SPTBN1,XBP1 (includes EG:140614)	11
Digestive System Development and Function	development	development of liver	1,22E-03	ACADM,ATF7,GATA6,JUN,MDM4,ONECUT2,RB1,SP1,SP3,SPTBN1,XBP1 (includes EG:140614)	11
Hepatic System Development and Function	development	development of liver	1,22E-03	ACADM,ATF7,GATA6,JUN,MDM4,ONECUT2,RB1,SP1,SP3,SPTBN1,XBP1 (includes EG:140614)	11
Cellular Development	differentiation	differentiation of red blood cells	1,22E-03	EPAS1,ETV6,GATA1,HIF1A,MLL5,RB1,RCOR1,RXRA,SP3,STAT5A,ZFPM1	11
Hematological System Development and Function	differentiation	differentiation of red blood cells	1,22E-03	EPAS1,ETV6,GATA1,HIF1A,MLL5,RB1,RCOR1,RXRA,SP3,STAT5A,ZFPM1	11
Hematopoiesis	differentiation	differentiation of red blood cells	1,22E-03	EPAS1,ETV6,GATA1,HIF1A,MLL5,RB1,RCOR1,RXRA,SP3,STAT5A,ZFPM1	11
Cell Death	fragmentation	fragmentation of DNA	1,24E-03	APP,BAX,EIF2AK2,KRT8,LMNA,PARP1,PPP1CC,SNCA,SOD1,TOP1,TOP2A,TP53 (includes EG:22059)	12
DNA Replication, Recombination, and Repair	fragmentation	fragmentation of DNA	1,24E-03	APP,BAX,EIF2AK2,KRT8,LMNA,PARP1,PPP1CC,SNCA,SOD1,TOP1,TOP2A,TP53 (includes EG:22059)	12
Cellular Growth and Proliferation	colony formation	colony formation of cells	1,25E-03	ATIC,CLTC,ESR1,ETV6,FLI1,HOXA9,IGF1R,JUN,KHDRBS1,NFE2,NPM1,PML,PTPN1,RB1,RUVBL1,RUVBL2,SLC3A2,SMC3,SOD1,TP53 (includes EG:22059),TP73,WT1	22
Cell Death	apoptosis	apoptosis of muscle cells	1,26E-03	ALDOA,ATP2B4,DSP,EEF1D,HSPD1,IKBKG,MAP3K1,MDH1,MDM2,MKI67,MKL1,PARP1,PLRG1,PPP1CC,RB1,SIRT1,SP1,TP53 (includes EG:22059)	18
Cell Death	loss	loss of dopaminergic neurons	1,28E-03	NR1H2,NR4A2,PARK7,SNCA	4
Nervous System Development and Function	loss	loss of dopaminergic neurons	1,28E-03	NR1H2,NR4A2,PARK7,SNCA	4
Cell Death	loss	loss of germ cells	1,28E-03	BAX,HTT,NCOA1,NCOA2	4
Cell Signaling	retinoic acid receptor signaling	retinoic acid receptor signaling	1,28E-03	ALDH1A2,PML,RXRA,TBX1	4
Connective Tissue Development and Function	adipogenesis	adipogenesis of adipose tissue	1,29E-03	CEBPB (includes EG:1051),CEBPD,CREB1,PKLR,PPARG,RB1	6
Tissue Development	adipogenesis	adipogenesis of adipose tissue	1,29E-03	CEBPB (includes EG:1051),CEBPD,CREB1,PKLR,PPARG,RB1	6
Cellular Assembly and Organization	morphology	morphology of nucleus	1,29E-03	APP,CEBPE,EMD,EP300,LMNA,ZMPSTE24	6
Cell Morphology	morphology	morphology of nucleus	1,29E-03	APP,CEBPE,EMD,EP300,LMNA,ZMPSTE24	6
Infectious Disease	replication	replication of HIV-1	1,29E-03	ANXA5,DHX9,NFKBIA,PML,PPIA,PRDX1	6
Cellular Development	differentiation	differentiation of connective tissue cells	1,30E-03	ARID5B,AXIN1,CCNT2,CEBPB (includes EG:1051),CEBPD,CREB1,CREB5,CTBP1,ELF4,FOS,FOSL2,GSK3B,HDAC1,HDAC4,JUN,MAF,MAML1,MDM2,MEF2C,MEF2D,NFATC1,NOC3L,NR3C2 (includes EG:110784),POU5F1,PPARA,PPARG,RARA,RB1,SF3B4,SIRT1,SMAD4,SREBF1,STAT1,TBL1X,TP53 (includes EG:22059),TRPS1,YY1	37
Cell Death	cell death	cell death of skin	1,30E-03	CFLAR,IKBKG,JUN,NR3C1,PARP1,PIAS4,RB1,STAT3,TP53 (includes EG:22059)	9
Cell Cycle	ploidy	ploidy	1,30E-03	BAX,GATA1,MYB,PARP1,PRMT1,RB1,SREBF1,TP53 (includes EG:22059),YY1	9
Small Molecule Biochemistry	quantity	quantity of glutathione	1,30E-03	APP,G6PD,HTT,RXRA,SLC1A2,SNCA,SOD1,TALDO1,TP53 (includes EG:22059)	9
Molecular Transport	quantity	quantity of glutathione	1,30E-03	APP,G6PD,HTT,RXRA,SLC1A2,SNCA,SOD1,TALDO1,TP53 (includes EG:22059)	9
Drug Metabolism	quantity	quantity of glutathione	1,30E-03	APP,G6PD,HTT,RXRA,SLC1A2,SNCA,SOD1,TALDO1,TP53 (includes EG:22059)	9
Free Radical Scavenging	metabolism	metabolism of reactive oxygen species	1,32E-03	ALB,ALDH3A2,ANXA1,APP,ARG1,BAX,CBS,CEBPE,CYCS,DNM1L,EPAS1,ETS1,ETV6,HSP90AB1,HTT,PARK7,PLCB3,PPARG,PRDX1,PTPN1,SERPINB1,SIRT1,SNCA,SOD1,SREBF2,TP53 (includes EG:22059),XBP1 (includes EG:140614)	27
Cell Death	loss	loss of neurons	1,37E-03	APP,CEBPB (includes EG:1051),DLX2,HTT,NR1H2,NR1H3,NR4A2,PARK7,SLC1A2,SNCA,SOD1	11
Nervous System Development and Function	loss	loss of neurons	1,37E-03	APP,CEBPB (includes EG:1051),DLX2,HTT,NR1H2,NR1H3,NR4A2,PARK7,SLC1A2,SNCA,SOD1	11
Cellular Development	adipogenesis	adipogenesis of mesenchymal cells	1,37E-03	CEBPB (includes EG:1051),CEBPD,PPARG	3
Embryonic Development	adipogenesis	adipogenesis of mesenchymal cells	1,37E-03	CEBPB (includes EG:1051),CEBPD,PPARG	3
Connective Tissue Development and Function	adipogenesis	adipogenesis of mesenchymal cells	1,37E-03	CEBPB (includes EG:1051),CEBPD,PPARG	3
Tissue Development	adipogenesis	adipogenesis of mesenchymal cells	1,37E-03	CEBPB (includes EG:1051),CEBPD,PPARG	3
Cell Death	apoptosis	apoptosis of salivary mucous cells	1,37E-03	ESR1,RBBP4,TP53 (includes EG:22059)	3
Cell Death	cell death	cell death of ectodermal cells	1,37E-03	DHX9,GATA6,HTT	3
Embryonic Development	cell death	cell death of ectodermal cells	1,37E-03	DHX9,GATA6,HTT	3
Cellular Compromise	damage	damage of epithelial cells	1,37E-03	KRT6A,SOD1,STAT3	3
Embryonic Development	morphology	morphology of embryonic stem cells	1,37E-03	NR5A1,SRF,TLN1	3
Cell Morphology	morphology	morphology of embryonic stem cells	1,37E-03	NR5A1,SRF,TLN1	3
Small Molecule Biochemistry	quantity	quantity of 4-androstene-3,17-dione	1,37E-03	ESR1,NR1H2,NR1H3	3
Molecular Transport	quantity	quantity of 4-androstene-3,17-dione	1,37E-03	ESR1,NR1H2,NR1H3	3
Lipid Metabolism	quantity	quantity of 4-androstene-3,17-dione	1,37E-03	ESR1,NR1H2,NR1H3	3
Endocrine System Development and Function	quantity	quantity of 4-androstene-3,17-dione	1,37E-03	ESR1,NR1H2,NR1H3	3
Molecular Transport	transport	transport of DNA	1,37E-03	KPNB1,RAN,TFRC	3
Cell Death	apoptosis	apoptosis of antigen presenting cells	1,41E-03	APP,CASP2,CEBPB (includes EG:1051),CFLAR,EIF2AK2,HIF1A,HSP90AB1,IRF1 (includes EG:16362),IRF2,NFKBIA,PARP1,PPARG,STAT1,TP53 (includes EG:22059)	14
Cardiovascular Disease	hypertrophy	hypertrophy of heart cells	1,41E-03	EEF1D,EP300,EPAS1,GATA6,GSK3B,JUN,MDM2,NFKBIA,PPIA,RAB1A,RAB2A,SIRT1,SP3,STAT3	14
Developmental Disorder	hypertrophy	hypertrophy of heart cells	1,41E-03	EEF1D,EP300,EPAS1,GATA6,GSK3B,JUN,MDM2,NFKBIA,PPIA,RAB1A,RAB2A,SIRT1,SP3,STAT3	14
Molecular Transport	export	export of molecule	1,44E-03	GSK3B,HSPA9,KHDRBS1,NUP160,RAN,SIRT1,XPO1,XPO5	8
Cell Death	apoptosis	apoptosis of exocrine cells	1,51E-03	ESR1,HSF1 (includes EG:15499),MKL1,RBBP4,TP53 (includes EG:22059)	5
Cell Death	cell death	cell death of carcinoma cells	1,51E-03	BAX,CFLAR,EIF2AK2,FASN,VHL	5
Embryonic Development	morphogenesis	morphogenesis of outflow tract	1,51E-03	HIF1A,JUN,MEF2C,TBX1,ZFPM1	5
Organismal Development	morphogenesis	morphogenesis of outflow tract	1,51E-03	HIF1A,JUN,MEF2C,TBX1,ZFPM1	5
Tissue Development	morphogenesis	morphogenesis of outflow tract	1,51E-03	HIF1A,JUN,MEF2C,TBX1,ZFPM1	5
Cardiovascular System Development and Function	morphogenesis	morphogenesis of outflow tract	1,51E-03	HIF1A,JUN,MEF2C,TBX1,ZFPM1	5
DNA Replication, Recombination, and Repair	stabilization	stabilization of chromosomes	1,51E-03	PARP1,PRKDC,RAN,TP53 (includes EG:22059),XRCC5	5
Cellular Assembly and Organization	stabilization	stabilization of chromosomes	1,51E-03	PARP1,PRKDC,RAN,TP53 (includes EG:22059),XRCC5	5
Cancer	tumorigenesis	tumorigenesis of B-cell non-Hodgkin lymphoma	1,51E-03	ETV6,MDM4,PTPN1,TP53 (includes EG:22059),XRCC5	5
Hematological Disease	tumorigenesis	tumorigenesis of B-cell non-Hodgkin lymphoma	1,51E-03	ETV6,MDM4,PTPN1,TP53 (includes EG:22059),XRCC5	5
Immunological Disease	tumorigenesis	tumorigenesis of B-cell non-Hodgkin lymphoma	1,51E-03	ETV6,MDM4,PTPN1,TP53 (includes EG:22059),XRCC5	5
Cell Death	apoptosis	apoptosis of lymphatic system cells	1,53E-03	BAX,CDK2,HDAC1,HOXA9,HSPA5,PARP1,PML,STAT1,STAT5A,TP53 (includes EG:22059),TP73	11
Cell Death	cell death	cell death of lymphoid organ	1,55E-03	BAX,BRCA1,CDK2,FOS,HIST1H1C,HSPA5,JUN,NR3C1,NR5A1,PARP1,PML,PRKDC,SATB1,TOP2A,TP53 (includes EG:22059),TP73	16
Cell Death	cell viability	cell viability of tumor cell lines	1,63E-03	APP,BRCA1,EEF2,HSP90AB1,NFKBIA,SOD1	6
Cell Cycle	cycling	cycling of centrosome	1,63E-03	BRCA1,CDK2,NPM1,TOP1,TP53 (includes EG:22059),XPO1	6
Gene Expression	methylation	methylation of DNA	1,63E-03	CTCF (includes EG:10664),DNMT1,DNMT3A,MBD1,MLL5,RB1	6
DNA Replication, Recombination, and Repair	methylation	methylation of DNA	1,63E-03	CTCF (includes EG:10664),DNMT1,DNMT3A,MBD1,MLL5,RB1	6
Hematological System Development and Function	quantity	quantity of leukocytes	1,66E-03	APP,BLM,CBS,CEBPB (includes EG:1051),CFLAR,CREB1,DNMT1,ELF4,EP300,ETS1,ETV6,FERMT3,FLI1,HIF1A,HOXA9,HSP90B1,HTT,IGF1R,IKBKG,IRF1 (includes EG:16362),IRF2,MAF,MAPKAPK2,MDM2,MSH2,NFATC1,NFKB2,NFKBIA,NPM1,NR3C1,PABPC1,PDGFC,PML,PNP,PPARG,RARA,S100A9,SATB1,SIRT1,SNCA,SOD1,SREBF1,SRF,STAT1,STAT3,STAT5A,TP53 (includes EG:22059),XBP1 (includes EG:140614),ZBTB16	49
Tissue Morphology	quantity	quantity of leukocytes	1,66E-03	APP,BLM,CBS,CEBPB (includes EG:1051),CFLAR,CREB1,DNMT1,ELF4,EP300,ETS1,ETV6,FERMT3,FLI1,HIF1A,HOXA9,HSP90B1,HTT,IGF1R,IKBKG,IRF1 (includes EG:16362),IRF2,MAF,MAPKAPK2,MDM2,MSH2,NFATC1,NFKB2,NFKBIA,NPM1,NR3C1,PABPC1,PDGFC,PML,PNP,PPARG,RARA,S100A9,SATB1,SIRT1,SNCA,SOD1,SREBF1,SRF,STAT1,STAT3,STAT5A,TP53 (includes EG:22059),XBP1 (includes EG:140614),ZBTB16	49
Cell Death	apoptosis	apoptosis of keratinocytes	1,68E-03	CFLAR,IKBKG,JUN,NR3C1,PARP1,PIAS4,STAT3,TP53 (includes EG:22059)	8
Cellular Development	differentiation	differentiation of lymphocytes	1,72E-03	ANXA1,AP3D1,BACH2,BLM,CEBPB (includes EG:1051),ELK1,ETS1,FOS,GATA1,HSP90AA1,HSP90B1,HSPD1,IGF1R,IRF1 (includes EG:16362),IRF2,MAF,MSH2,MYB,NFATC1,PARP1,PNP,PRKDC,RORA,RPL22,RPS6,SP3,STAT1,STAT3,STAT5A,TP53 (includes EG:22059),XBP1 (includes EG:140614),XRCC4,XRCC5,YY1	34
Hematological System Development and Function	differentiation	differentiation of lymphocytes	1,72E-03	ANXA1,AP3D1,BACH2,BLM,CEBPB (includes EG:1051),ELK1,ETS1,FOS,GATA1,HSP90AA1,HSP90B1,HSPD1,IGF1R,IRF1 (includes EG:16362),IRF2,MAF,MSH2,MYB,NFATC1,PARP1,PNP,PRKDC,RORA,RPL22,RPS6,SP3,STAT1,STAT3,STAT5A,TP53 (includes EG:22059),XBP1 (includes EG:140614),XRCC4,XRCC5,YY1	34
Hematopoiesis	differentiation	differentiation of lymphocytes	1,72E-03	ANXA1,AP3D1,BACH2,BLM,CEBPB (includes EG:1051),ELK1,ETS1,FOS,GATA1,HSP90AA1,HSP90B1,HSPD1,IGF1R,IRF1 (includes EG:16362),IRF2,MAF,MSH2,MYB,NFATC1,PARP1,PNP,PRKDC,RORA,RPL22,RPS6,SP3,STAT1,STAT3,STAT5A,TP53 (includes EG:22059),XBP1 (includes EG:140614),XRCC4,XRCC5,YY1	34
Cellular Function and Maintenance	organization	organization of cytoskeleton	1,75E-03	APP,AR,AXIN1,BAX,CANX,CAP1,CAPZB,CORO1C,CREB1,CYFIP1,DSP,FERMT3,FLNA,FLNC,GSK3B,HDGF,HTT,IFT172,KPNB1,KRT17,KRT6A,MAP3K1,MAP4,MSN,MYH10,MYH9,NUMA1,NUP85 (includes EG:287830),ONECUT2,PPARG,PTPN1,RANBP2,S100A9,SMARCA5,SOD1,SP1,SRF,SSRP1,STAT3,TLN1,TP53 (includes EG:22059),TUBB,VASP,VCL,VHL,VIM	46
Cellular Assembly and Organization	organization	organization of cytoskeleton	1,75E-03	APP,AR,AXIN1,BAX,CANX,CAP1,CAPZB,CORO1C,CREB1,CYFIP1,DSP,FERMT3,FLNA,FLNC,GSK3B,HDGF,HTT,IFT172,KPNB1,KRT17,KRT6A,MAP3K1,MAP4,MSN,MYH10,MYH9,NUMA1,NUP85 (includes EG:287830),ONECUT2,PPARG,PTPN1,RANBP2,S100A9,SMARCA5,SOD1,SP1,SRF,SSRP1,STAT3,TLN1,TP53 (includes EG:22059),TUBB,VASP,VCL,VHL,VIM	46
Cellular Development	differentiation	differentiation of germ cell tumor cell lines	1,76E-03	AXIN1,JUN,MEF2C,PPIA,PRPF19,RARA,SMAD4	7
Molecular Transport	import	import of protein	1,76E-03	HTT,IPO9,KPNB1,PML,RAN,SPTBN1,XPO1	7
Protein Trafficking	import	import of protein	1,76E-03	HTT,IPO9,KPNB1,PML,RAN,SPTBN1,XPO1	7
Cellular Growth and Proliferation	proliferation	proliferation of macrophages	1,76E-03	CEBPB (includes EG:1051),NR1H2,NR1H3,NR3C1,STAT3,STAT5A,TP53 (includes EG:22059)	7
Hematological System Development and Function	proliferation	proliferation of macrophages	1,76E-03	CEBPB (includes EG:1051),NR1H2,NR1H3,NR3C1,STAT3,STAT5A,TP53 (includes EG:22059)	7
Inflammatory Response	proliferation	proliferation of macrophages	1,76E-03	CEBPB (includes EG:1051),NR1H2,NR1H3,NR3C1,STAT3,STAT5A,TP53 (includes EG:22059)	7
Antigen Presentation	proliferation	proliferation of macrophages	1,76E-03	CEBPB (includes EG:1051),NR1H2,NR1H3,NR3C1,STAT3,STAT5A,TP53 (includes EG:22059)	7
Cardiovascular Disease	heart disease	heart disease	1,87E-03	ACTC1,ANXA5,ARNTL,CFLAR,CREB1,DYRK1A,EP300,HTT,IGF1R,IKBKG,JUP,LMNA,MDM2,MDM4,MYH9,NR3C2 (includes EG:110784),PDGFC,PPARA,PPARG,PPP1CA,RXRA,STAT3,VCL,VHL,ZMPSTE24	25
Cell Cycle	interphase	entry into interphase	1,89E-03	APP,CDK2,CEBPB (includes EG:1051),DDX3X,FOS,GTF2I,IGF1R,JUN,LMNA,PPARG,RB1,TP53 (includes EG:22059)	12
Dermatological Diseases and Conditions	abscess	abscess	1,92E-03	HSP90B1,SMAD4,STAT1,XBP1 (includes EG:140614)	4
Cell Death	apoptosis	apoptosis of crypt cells	1,92E-03	BAX,ESR1,MDM2,TP53 (includes EG:22059)	4
Cell Death	cell death	cell death of melanoma cells	1,92E-03	BAX,IGF1R,JUN,TP53 (includes EG:22059)	4
Cellular Compromise	damage	damage of cerebral cortex cells	1,92E-03	APP,BAX,PPARG,SLC1A2	4
Organismal Injury and Abnormalities	formation	formation of polyp	1,92E-03	CDX2,PPARG,SMAD4,TP53 (includes EG:22059)	4
Gastrointestinal Disease	formation	formation of polyp	1,92E-03	CDX2,PPARG,SMAD4,TP53 (includes EG:22059)	4
Cellular Development	osteoclastogenesis	osteoclastogenesis of bone-marrow-derived monocyte/macrophage precursor cells	1,92E-03	FOS,MAFB,NFKBIA,STAT1	4
Hematological System Development and Function	osteoclastogenesis	osteoclastogenesis of bone-marrow-derived monocyte/macrophage precursor cells	1,92E-03	FOS,MAFB,NFKBIA,STAT1	4
Hematopoiesis	osteoclastogenesis	osteoclastogenesis of bone-marrow-derived monocyte/macrophage precursor cells	1,92E-03	FOS,MAFB,NFKBIA,STAT1	4
Connective Tissue Development and Function	osteoclastogenesis	osteoclastogenesis of bone-marrow-derived monocyte/macrophage precursor cells	1,92E-03	FOS,MAFB,NFKBIA,STAT1	4
Tissue Development	osteoclastogenesis	osteoclastogenesis of bone-marrow-derived monocyte/macrophage precursor cells	1,92E-03	FOS,MAFB,NFKBIA,STAT1	4
Skeletal and Muscular System Development and Function	osteoclastogenesis	osteoclastogenesis of bone-marrow-derived monocyte/macrophage precursor cells	1,92E-03	FOS,MAFB,NFKBIA,STAT1	4
Lymphoid Tissue Structure and Development	osteoclastogenesis	osteoclastogenesis of bone-marrow-derived monocyte/macrophage precursor cells	1,92E-03	FOS,MAFB,NFKBIA,STAT1	4
RNA Post-Transcriptional Modification	processing	processing of rRNA	1,92E-03	BOP1/LOC727967,EBNA1BP2,FBL,RPS6	4
Developmental Disorder	hypertrophy	hypertrophy of cells	1,98E-03	EEF1D,EP300,EPAS1,ESR1,GATA6,GSK3B,JUN,MDM2,NFKBIA,PARK7,PPARA,PPARG,PPIA,RAB1A,RAB2A,SIRT1,SOD1,SP3,SREBF1,STAT3	20
Cellular Development	differentiation	differentiation of tissue	1,98E-03	AR,BAX,FOSL2,HIST1H1B,HSP90B1,NFKBIA,PDGFC,PPARG,SGPL1,SIRT1,TFAP2C,TP63,WT1	13
Tissue Development	differentiation	differentiation of tissue	1,98E-03	AR,BAX,FOSL2,HIST1H1B,HSP90B1,NFKBIA,PDGFC,PPARG,SGPL1,SIRT1,TFAP2C,TP63,WT1	13
Organismal Survival	lifespan	lifespan of organism	1,98E-03	BAX,CEBPB (includes EG:1051),CLCN7,HSF1 (includes EG:15499),HTT,MSH2,MSH6,RAD52 (includes EG:19365),RB1,SOD1,TP53 (includes EG:22059),WRN,ZMPSTE24	13
Cellular Development	growth	arrest in growth of fibroblasts	2,00E-03	HIF1A,PPARG,SMAD4,STAT1,TP53 (includes EG:22059)	5
Cellular Growth and Proliferation	growth	arrest in growth of fibroblasts	2,00E-03	HIF1A,PPARG,SMAD4,STAT1,TP53 (includes EG:22059)	5
Connective Tissue Development and Function	growth	arrest in growth of fibroblasts	2,00E-03	HIF1A,PPARG,SMAD4,STAT1,TP53 (includes EG:22059)	5
Organismal Injury and Abnormalities	hyperkeratosis	hyperkeratosis of skin	2,00E-03	KRT10,MDM2,RB1,STAT1,TP53 (includes EG:22059)	5
Dermatological Diseases and Conditions	hyperkeratosis	hyperkeratosis of skin	2,00E-03	KRT10,MDM2,RB1,STAT1,TP53 (includes EG:22059)	5
Cell Cycle	G0/G1 phase transition	G0/G1 phase transition	2,02E-03	DAXX,EIF2AK2,FOS,GNB2L1,STAT1,TP53 (includes EG:22059)	6
Cell Cycle	G0 phase	arrest in G0 phase	2,02E-03	CEBPD,DAXX,EIF2AK2,FOS,STAT1,TP53 (includes EG:22059)	6
Organismal Injury and Abnormalities	polyp	polyp	2,02E-03	CDX2,DNMT1,MSH2,PPARG,SMAD4,TP53 (includes EG:22059)	6
Cellular Growth and Proliferation	proliferation	proliferation of epidermal cells	2,08E-03	CDK2,JUP,KRT10,MAPKAPK2,MKI67,NR3C1,POU3F2,RB1,RXRA,TP53 (includes EG:22059),TP63,YAP1 (includes EG:10413)	12
Hair and Skin Development and Function	proliferation	proliferation of epidermal cells	2,08E-03	CDK2,JUP,KRT10,MAPKAPK2,MKI67,NR3C1,POU3F2,RB1,RXRA,TP53 (includes EG:22059),TP63,YAP1 (includes EG:10413)	12
Cell Death	cell death	cell death of sensory neurons	2,11E-03	CREB1,DLX2,HIPK2,HSF1 (includes EG:15499),JUN,NFKBIA,STAT1	7
Organismal Development	size	size of body	2,11E-03	APP,ATXN2,CREB1,G6PD,HSF1 (includes EG:15499),POU3F2,SGPL1,SOD1,STAT3,STAT5A	10
Cellular Development	differentiation	differentiation of fibroblast cell lines	2,13E-03	AXIN1,CDK2,CEBPB (includes EG:1051),DYRK1A,ESRRG,FOXF2,HDAC1,HSP90AA1,LMNA,NR3C1,NR3C2 (includes EG:110784),PDE4A,PGR (includes EG:18667),PPARG,RB1,STAT5A	16
Connective Tissue Development and Function	differentiation	differentiation of fibroblast cell lines	2,13E-03	AXIN1,CDK2,CEBPB (includes EG:1051),DYRK1A,ESRRG,FOXF2,HDAC1,HSP90AA1,LMNA,NR3C1,NR3C2 (includes EG:110784),PDE4A,PGR (includes EG:18667),PPARG,RB1,STAT5A	16
Cellular Development	development	development of thymocytes	2,14E-03	BAX,BRCA1,CREB1,ETS1,IRF1 (includes EG:16362),MYB,RPL22,SATB1,SRF,TP53 (includes EG:22059),WT1	11
Embryonic Development	development	development of thymocytes	2,14E-03	BAX,BRCA1,CREB1,ETS1,IRF1 (includes EG:16362),MYB,RPL22,SATB1,SRF,TP53 (includes EG:22059),WT1	11
Hematological System Development and Function	development	development of thymocytes	2,14E-03	BAX,BRCA1,CREB1,ETS1,IRF1 (includes EG:16362),MYB,RPL22,SATB1,SRF,TP53 (includes EG:22059),WT1	11
Hematopoiesis	development	development of thymocytes	2,14E-03	BAX,BRCA1,CREB1,ETS1,IRF1 (includes EG:16362),MYB,RPL22,SATB1,SRF,TP53 (includes EG:22059),WT1	11
Cellular Function and Maintenance	development	development of thymocytes	2,14E-03	BAX,BRCA1,CREB1,ETS1,IRF1 (includes EG:16362),MYB,RPL22,SATB1,SRF,TP53 (includes EG:22059),WT1	11
Organ Development	development	development of thymocytes	2,14E-03	BAX,BRCA1,CREB1,ETS1,IRF1 (includes EG:16362),MYB,RPL22,SATB1,SRF,TP53 (includes EG:22059),WT1	11
Organismal Development	development	development of thymocytes	2,14E-03	BAX,BRCA1,CREB1,ETS1,IRF1 (includes EG:16362),MYB,RPL22,SATB1,SRF,TP53 (includes EG:22059),WT1	11
Tissue Development	development	development of thymocytes	2,14E-03	BAX,BRCA1,CREB1,ETS1,IRF1 (includes EG:16362),MYB,RPL22,SATB1,SRF,TP53 (includes EG:22059),WT1	11
Lymphoid Tissue Structure and Development	development	development of thymocytes	2,14E-03	BAX,BRCA1,CREB1,ETS1,IRF1 (includes EG:16362),MYB,RPL22,SATB1,SRF,TP53 (includes EG:22059),WT1	11
Cell-mediated Immune Response	development	development of thymocytes	2,14E-03	BAX,BRCA1,CREB1,ETS1,IRF1 (includes EG:16362),MYB,RPL22,SATB1,SRF,TP53 (includes EG:22059),WT1	11
Developmental Disorder	hypoplasia	hypoplasia	2,20E-03	BAX,CEBPB (includes EG:1051),ESR1,FOXF2,IGF1R,KRT10,NCOA2,PBRM1,RXRA,STAT3,TBX1,WT1,XBP1 (includes EG:140614),ZIC3	14
Embryonic Development	development	development of body axis	2,22E-03	ALDH1A2,AXIN1,CDX2,CHD8,HIPK2,HOXA9,HSF1 (includes EG:15499),HSF4,HTT,IFT172,NR3C1,OTX1,RARA,RNF2,SF3B1,SMAD4,TBX1,TP63,YY1,ZBTB16,ZIC3	21
Organismal Development	development	development of body axis	2,22E-03	ALDH1A2,AXIN1,CDX2,CHD8,HIPK2,HOXA9,HSF1 (includes EG:15499),HSF4,HTT,IFT172,NR3C1,OTX1,RARA,RNF2,SF3B1,SMAD4,TBX1,TP63,YY1,ZBTB16,ZIC3	21
Embryonic Development	development	development of hippocampus	2,25E-03	APP,CREB1,DLX2,HDAC1,POU3F2,POU3F3,SRF,TP73,ZEB2	9
Organ Development	development	development of hippocampus	2,25E-03	APP,CREB1,DLX2,HDAC1,POU3F2,POU3F3,SRF,TP73,ZEB2	9
Organismal Development	development	development of hippocampus	2,25E-03	APP,CREB1,DLX2,HDAC1,POU3F2,POU3F3,SRF,TP73,ZEB2	9
Tissue Development	development	development of hippocampus	2,25E-03	APP,CREB1,DLX2,HDAC1,POU3F2,POU3F3,SRF,TP73,ZEB2	9
Nervous System Development and Function	development	development of hippocampus	2,25E-03	APP,CREB1,DLX2,HDAC1,POU3F2,POU3F3,SRF,TP73,ZEB2	9
Cellular Development	differentiation	differentiation of myeloid cells	2,26E-03	CEBPE,CTBP1,GATA1,HOXA9,IGF1R,JUN,MEF2C,MYB,NFATC1,NFKBIA,PML,PPARG,RARA,RB1,SP3,STAT3,STAT5A,TP53 (includes EG:22059),ZBTB16	19
Hematological System Development and Function	differentiation	differentiation of myeloid cells	2,26E-03	CEBPE,CTBP1,GATA1,HOXA9,IGF1R,JUN,MEF2C,MYB,NFATC1,NFKBIA,PML,PPARG,RARA,RB1,SP3,STAT3,STAT5A,TP53 (includes EG:22059),ZBTB16	19
Hematopoiesis	differentiation	differentiation of myeloid cells	2,26E-03	CEBPE,CTBP1,GATA1,HOXA9,IGF1R,JUN,MEF2C,MYB,NFATC1,NFKBIA,PML,PPARG,RARA,RB1,SP3,STAT3,STAT5A,TP53 (includes EG:22059),ZBTB16	19
Digestive System Development and Function	development	development of gastrointestinal tract	2,30E-03	CDX2,FOXF2,HDGF,IGF2BP1,NFKB2,PRKDC,RB1,SOX10,SPTBN1,TBX1,TP73,XBP1 (includes EG:140614)	12
Cancer	sarcoma	sarcoma	2,30E-03	BAX,BLM,BRCA1,FOS,GATA1,HSPA4,JUN,MDM2,MDM4,MSH2,RB1,TP53 (includes EG:22059)	12
Cell Death	apoptosis	apoptosis of myeloid cells	2,36E-03	APP,BAX,CASP2,CDK2,CEBPB (includes EG:1051),CFLAR,EIF2AK2,HIF1A,IRF1 (includes EG:16362),IRF2,NFKBIA,PARP1,PPARG,STAT1,TP53 (includes EG:22059)	15
Cell Cycle	checkpoint control	checkpoint control	2,49E-03	CDK2,MDC1,MDM2,MSH2,TP53 (includes EG:22059),TP53BP1	6
DNA Replication, Recombination, and Repair	checkpoint control	checkpoint control	2,49E-03	CDK2,MDC1,MDM2,MSH2,TP53 (includes EG:22059),TP53BP1	6
Protein Synthesis	stabilization	stabilization of protein	2,49E-03	CANX,HSPA5,IPO9,MORC3,PARK7,TRIM24	6
Protein Degradation	stabilization	stabilization of protein	2,49E-03	CANX,HSPA5,IPO9,MORC3,PARK7,TRIM24	6
Small Molecule Biochemistry	homeostasis	homeostasis of cholesterol	2,50E-03	NCOA1,NCOA2,NR1H2,NR1H3,NR5A2,SOD1,SREBF2	7
Lipid Metabolism	homeostasis	homeostasis of cholesterol	2,50E-03	NCOA1,NCOA2,NR1H2,NR1H3,NR5A2,SOD1,SREBF2	7
Vitamin and Mineral Metabolism	homeostasis	homeostasis of cholesterol	2,50E-03	NCOA1,NCOA2,NR1H2,NR1H3,NR5A2,SOD1,SREBF2	7
Organ Morphology	mass	mass of organ	2,56E-03	APP,AR,BRD4,CDK2,EP300,ESR1,ETS1,HTT,MAP3K1,NFE2,PNP,PPARA,PPARG,SIRT1,TKT	15
Cellular Development	adipogenesis	adipogenesis of adipocytes	2,59E-03	CEBPB (includes EG:1051),CEBPD,CREB1,PPARG,RB1	5
Connective Tissue Development and Function	adipogenesis	adipogenesis of adipocytes	2,59E-03	CEBPB (includes EG:1051),CEBPD,CREB1,PPARG,RB1	5
Tissue Development	adipogenesis	adipogenesis of adipocytes	2,59E-03	CEBPB (includes EG:1051),CEBPD,CREB1,PPARG,RB1	5
Cellular Development	differentiation	differentiation of leukemia cells	2,59E-03	GATA1,HOXA9,PML,RARA,ZBTB16	5
DNA Replication, Recombination, and Repair	formation	formation of mitotic spindle	2,59E-03	KPNB1,MDM2,RAN,TP53 (includes EG:22059),TUBB	5
Cellular Assembly and Organization	formation	formation of mitotic spindle	2,59E-03	KPNB1,MDM2,RAN,TP53 (includes EG:22059),TUBB	5
Protein Synthesis	catabolism	catabolism of protein	2,64E-03	ARNTL,AXIN1,MDM2,PPARA,SERPINB1,TRIM24,USP25,VCP,VHL,XPO1,ZMPSTE24	11
Protein Degradation	catabolism	catabolism of protein	2,64E-03	ARNTL,AXIN1,MDM2,PPARA,SERPINB1,TRIM24,USP25,VCP,VHL,XPO1,ZMPSTE24	11
Cellular Compromise	degeneration	degeneration of neurons	2,64E-03	APP,ATXN1,BAX,CREB1,EP300,HTT,MAFG,NR4A2,PSMC1,SLC1A2,SNCA	11
Cancer	angiosarcoma	angiosarcoma	2,64E-03	BAX,MSH2,TP53 (includes EG:22059)	3
DNA Replication, Recombination, and Repair	repair	delay in repair of DNA	2,64E-03	MDM2,PARP1,TP53 (includes EG:22059)	3
Cellular Development	differentiation	differentiation of tumor	2,64E-03	DNMT1,PPARG,TP53 (includes EG:22059)	3
Cancer	differentiation	differentiation of tumor	2,64E-03	DNMT1,PPARG,TP53 (includes EG:22059)	3
Tumor Morphology	differentiation	differentiation of tumor	2,64E-03	DNMT1,PPARG,TP53 (includes EG:22059)	3
Organismal Injury and Abnormalities	formation	formation of abscess	2,64E-03	HSP90B1,SMAD4,XBP1 (includes EG:140614)	3
Dermatological Diseases and Conditions	formation	formation of abscess	2,64E-03	HSP90B1,SMAD4,XBP1 (includes EG:140614)	3
Cellular Assembly and Organization	fusion	fusion of liposome	2,64E-03	ANXA1,ANXA2,APP	3
Organismal Injury and Abnormalities	gliosis	gliosis of nervous tissue	2,64E-03	AR,HTT,SOD1	3
Neurological Disease	gliosis	gliosis of nervous tissue	2,64E-03	AR,HTT,SOD1	3
Cellular Development	growth	growth of mesenchymal stem cells	2,64E-03	PPARG,RB1,TP53 (includes EG:22059)	3
Cellular Growth and Proliferation	growth	growth of mesenchymal stem cells	2,64E-03	PPARG,RB1,TP53 (includes EG:22059)	3
Hematological System Development and Function	growth	growth of mesenchymal stem cells	2,64E-03	PPARG,RB1,TP53 (includes EG:22059)	3
Hematopoiesis	growth	growth of mesenchymal stem cells	2,64E-03	PPARG,RB1,TP53 (includes EG:22059)	3
Lymphoid Tissue Structure and Development	growth	growth of mesenchymal stem cells	2,64E-03	PPARG,RB1,TP53 (includes EG:22059)	3
Metabolic Disease	lipodystrophy	lipodystrophy	2,64E-03	PPARG,SREBF1,ZMPSTE24	3
Cellular Development	maturation	maturation of neutrophils	2,64E-03	PML,RARA,STAT3	3
Hematological System Development and Function	maturation	maturation of neutrophils	2,64E-03	PML,RARA,STAT3	3
Hematopoiesis	maturation	maturation of neutrophils	2,64E-03	PML,RARA,STAT3	3
Skeletal and Muscular Disorders	myopathy	myopathy of muscle	2,64E-03	AR,LMNA,PPARA	3
Cellular Compromise	neurodegeneration	neurodegeneration of hippocampal neurons	2,64E-03	APP,CREB1,GSK3B	3
Organismal Injury and Abnormalities	neurodegeneration	neurodegeneration of hippocampal neurons	2,64E-03	APP,CREB1,GSK3B	3
Neurological Disease	neurodegeneration	neurodegeneration of hippocampal neurons	2,64E-03	APP,CREB1,GSK3B	3
Cell Cycle	ploidy	ploidy of bone marrow cells	2,64E-03	MYB,RB1,TP53 (includes EG:22059)	3
Cellular Assembly and Organization	sealing	sealing of cellular membrane	2,64E-03	DSP,MYH10,MYH9	3
Cellular Assembly and Organization	size	size of granules	2,64E-03	KRT8,MDM2,TP53 (includes EG:22059)	3
Cell Morphology	size	size of granules	2,64E-03	KRT8,MDM2,TP53 (includes EG:22059)	3
Gene Expression	synthesis	synthesis of rRNA	2,64E-03	EIF2S1,RB1,TP53 (includes EG:22059)	3
Cancer	tumorigenesis	tumorigenesis of osteosarcoma	2,64E-03	FOS,RB1,TP53 (includes EG:22059)	3
Skeletal and Muscular Disorders	tumorigenesis	tumorigenesis of osteosarcoma	2,64E-03	FOS,RB1,TP53 (includes EG:22059)	3
Embryonic Development	vasculogenesis	vasculogenesis of extraembryonic tissue	2,64E-03	LEMD3,VHL,YAP1 (includes EG:10413)	3
Organismal Development	vasculogenesis	vasculogenesis of extraembryonic tissue	2,64E-03	LEMD3,VHL,YAP1 (includes EG:10413)	3
Tissue Development	vasculogenesis	vasculogenesis of extraembryonic tissue	2,64E-03	LEMD3,VHL,YAP1 (includes EG:10413)	3
Cardiovascular System Development and Function	vasculogenesis	vasculogenesis of extraembryonic tissue	2,64E-03	LEMD3,VHL,YAP1 (includes EG:10413)	3
Skeletal and Muscular Disorders	weakness	weakness of muscle	2,64E-03	AR,LMNA,ZMPSTE24	3
Embryonic Development	development	development of gland	2,73E-03	ALDH1A2,AR,ARID5B,CREB1,ESR1,GATA6,IGF1R,NR3C1,NR5A1,ONECUT2,OTX1,PLAG1,POU3F2,RB1,TBX1,TP63,WT1	17
Organ Development	development	development of gland	2,73E-03	ALDH1A2,AR,ARID5B,CREB1,ESR1,GATA6,IGF1R,NR3C1,NR5A1,ONECUT2,OTX1,PLAG1,POU3F2,RB1,TBX1,TP63,WT1	17
Organismal Development	development	development of gland	2,73E-03	ALDH1A2,AR,ARID5B,CREB1,ESR1,GATA6,IGF1R,NR3C1,NR5A1,ONECUT2,OTX1,PLAG1,POU3F2,RB1,TBX1,TP63,WT1	17
Tissue Development	development	development of gland	2,73E-03	ALDH1A2,AR,ARID5B,CREB1,ESR1,GATA6,IGF1R,NR3C1,NR5A1,ONECUT2,OTX1,PLAG1,POU3F2,RB1,TBX1,TP63,WT1	17
Connective Tissue Development and Function	adipogenesis	adipogenesis of fat	2,77E-03	CEBPB (includes EG:1051),PPARG,RXRA,SREBF1	4
Small Molecule Biochemistry	adipogenesis	adipogenesis of fat	2,77E-03	CEBPB (includes EG:1051),PPARG,RXRA,SREBF1	4
Lipid Metabolism	adipogenesis	adipogenesis of fat	2,77E-03	CEBPB (includes EG:1051),PPARG,RXRA,SREBF1	4
Cellular Function and Maintenance	cytostasis	cytostasis of fibroblasts	2,77E-03	CASP2,JUN,SAFB,TP53 (includes EG:22059)	4
Connective Tissue Development and Function	cytostasis	cytostasis of fibroblasts	2,77E-03	CASP2,JUN,SAFB,TP53 (includes EG:22059)	4
Embryonic Development	development	development of corpus luteum	2,77E-03	CEBPB (includes EG:1051),ESR1,SOD1,STAT5A	4
Organ Development	development	development of corpus luteum	2,77E-03	CEBPB (includes EG:1051),ESR1,SOD1,STAT5A	4
Organismal Development	development	development of corpus luteum	2,77E-03	CEBPB (includes EG:1051),ESR1,SOD1,STAT5A	4
Tissue Development	development	development of corpus luteum	2,77E-03	CEBPB (includes EG:1051),ESR1,SOD1,STAT5A	4
Reproductive System Development and Function	development	development of corpus luteum	2,77E-03	CEBPB (includes EG:1051),ESR1,SOD1,STAT5A	4
Cellular Function and Maintenance	permeability	permeability of cellular membrane	2,77E-03	APP,BAX,HTT,TP53 (includes EG:22059)	4
Cellular Assembly and Organization	permeability	permeability of cellular membrane	2,77E-03	APP,BAX,HTT,TP53 (includes EG:22059)	4
Small Molecule Biochemistry	production	production of lactic acid	2,77E-03	FLI1,SIRT1,SLC25A12,STAT3	4
Cellular Assembly and Organization	quantity	quantity of cellular inclusion bodies	2,77E-03	APP,ESR1,HTT,SNCA	4
Cancer	tumorigenesis	tumorigenesis of bone tumor	2,77E-03	FOS,NPM1,RB1,TP53 (includes EG:22059)	4
Skeletal and Muscular Disorders	tumorigenesis	tumorigenesis of bone tumor	2,77E-03	FOS,NPM1,RB1,TP53 (includes EG:22059)	4
Cell Cycle	aneuploidy	aneuploidy of thymic lymphoma cells	2,81E-03	BAX,TP53 (includes EG:22059)	2
Cell Death	apoptosis	apoptosis of lens fiber cells	2,81E-03	RB1,TP53 (includes EG:22059)	2
Cell Death	apoptosis	apoptosis of sunburn cells	2,81E-03	BAX,TP53 (includes EG:22059)	2
Skeletal and Muscular System Development and Function	assembly	assembly of thin filaments	2,81E-03	ACTC1,PROX1	2
Cellular Assembly and Organization	assembly	assembly of thin filaments	2,81E-03	ACTC1,PROX1	2
Organismal Injury and Abnormalities	atrophy	atrophy of nervous tissue	2,81E-03	HTT,SNCA	2
Neurological Disease	atrophy	atrophy of nervous tissue	2,81E-03	HTT,SNCA	2
Cardiovascular Disease	bleeding	bleeding of pericardium	2,81E-03	TP53 (includes EG:22059),WT1	2
Organismal Injury and Abnormalities	bleeding	bleeding of pericardium	2,81E-03	TP53 (includes EG:22059),WT1	2
Connective Tissue Disorders	bleeding	bleeding of pericardium	2,81E-03	TP53 (includes EG:22059),WT1	2
Cellular Compromise	breakdown	breakdown of cellular membrane	2,81E-03	PPARA,TP53 (includes EG:22059)	2
Cell Cycle	cell division	cell division of mitochondria	2,81E-03	BAX,DNM1L	2
Embryonic Development	cell spreading	cell spreading of embryonic stem cells	2,81E-03	SRF,TLN1	2
Cell Morphology	cell spreading	cell spreading of embryonic stem cells	2,81E-03	SRF,TLN1	2
Cellular Assembly and Organization	clustering	clustering of centrosome	2,81E-03	RB1,TP53 (includes EG:22059)	2
Cell Death	colony survival	colony survival of fibroblast cell lines	2,81E-03	JUN,TP53 (includes EG:22059)	2
Cellular Function and Maintenance	colony survival	colony survival of fibroblast cell lines	2,81E-03	JUN,TP53 (includes EG:22059)	2
Connective Tissue Development and Function	colony survival	colony survival of fibroblast cell lines	2,81E-03	JUN,TP53 (includes EG:22059)	2
Cellular Compromise	degeneration	degeneration of myelin figure	2,81E-03	RAB1A,SNCA	2
Gene Expression	demethylation	demethylation of DNA	2,81E-03	DNMT1,TP53 (includes EG:22059)	2
DNA Replication, Recombination, and Repair	demethylation	demethylation of DNA	2,81E-03	DNMT1,TP53 (includes EG:22059)	2
Organismal Development	density	density of sinusoid	2,81E-03	NCOA1,NCOA3	2
Tissue Morphology	density	density of sinusoid	2,81E-03	NCOA1,NCOA3	2
Cardiovascular System Development and Function	density	density of sinusoid	2,81E-03	NCOA1,NCOA3	2
Dermatological Diseases and Conditions	desquamation	desquamation of germ cells	2,81E-03	NCOA1,NCOA2	2
Reproductive System Disease	desquamation	desquamation of germ cells	2,81E-03	NCOA1,NCOA2	2
Dermatological Diseases and Conditions	desquamation	desquamation of skin	2,81E-03	MDM2,TP53 (includes EG:22059)	2
Hematological System Development and Function	detachment	detachment of neutrophils	2,81E-03	ANXA1,ANXA5	2
Tissue Development	detachment	detachment of neutrophils	2,81E-03	ANXA1,ANXA5	2
Cellular Movement	detachment	detachment of neutrophils	2,81E-03	ANXA1,ANXA5	2
Cell-To-Cell Signaling and Interaction	detachment	detachment of neutrophils	2,81E-03	ANXA1,ANXA5	2
Immune Cell Trafficking	detachment	detachment of neutrophils	2,81E-03	ANXA1,ANXA5	2
Cellular Development	development	development of erythroid precursor cells	2,81E-03	GATA1,RB1	2
Hematological System Development and Function	development	development of erythroid precursor cells	2,81E-03	GATA1,RB1	2
Hematopoiesis	development	development of erythroid precursor cells	2,81E-03	GATA1,RB1	2
Organismal Development	development	development of erythroid precursor cells	2,81E-03	GATA1,RB1	2
Tissue Development	development	development of erythroid precursor cells	2,81E-03	GATA1,RB1	2
