# Supplementary material for: Strategies to Identify Recognition Signals and Targets of SUMOylation
Source: Biochem Res Int. 2012 Jul 1;2012:875148. doi: 10.1155/2012/875148 (PMC3395311; doi:10.1155/2012/875148)
Supplement: Supplementary file 8 [file 875148.f8.xls]

## Sheet: Sheet0
Supplementary table 5 Canonical pathways of putative and real sumoylated proteins found using IPA.
© 2000-2012 Ingenuity Systems, Inc. All rights reserved.
Ingenuity Canonical Pathways	-log(p-value)	Ratio	Molecules
EIF2 Signaling	1,21E01	1,95E-01	PPP1CC,RPL22,RPL27A,RPS18,RPS8,RPS6,PPP1CB,RPL14,EIF2S1,RPL7,RPS7,RPL6,RPS3A,RPL18A,RPS16,GSK3B,PPP1CA,RPS3,RPL18,RPL13,PABPC1,PIK3C2A,RPL3,RPL7A,RPS2,RPL17,RPL12,RPLP0,RPL15,RPL5,UBA52,EIF4A1,RPL26L1,EIF2AK2,RPL13A,RPS27A,RPSA
Aminoacyl-tRNA Biosynthesis	1,04E01	1,97E-01	GARS,DARS2,MARS,FARSB,FARSA,EPRS,NARS,LARS,WARS,YARS,KARS,DARS,AARS,SARS,IARS
ATM Signaling	8,03E00	2,96E-01	TP53 (includes EG:22059),SMC3,TP73,MDC1,MDM2,CREB5,SMC1A,MDM4,NFKBIA,JUN,SMC2,FANCD2,CREB1,TP53BP1,BRCA1,CDK2
Glucocorticoid Receptor Signaling	7,56E00	1,3E-01	HSPA5,NR3C1,EP300,PGR (includes EG:18667),HSPA4,IKBKG,HSP90B1,JUN,AR,NFKBIA,NCOA2,HSP90AB1,ANXA1,CREB1,SMAD4,STAT1,TAF2 (includes EG:170844),TAF12 (includes EG:386637),STAT5A,PIK3C2A,HSPA9,MAP3K1,NFATC1,IKBKE,STAT3,CEBPB (includes EG:1051),NCOA3,HSPA8,FOS,TAF5,SUMO1,NCOA1,HSP90AA1,NR3C2 (includes EG:110784),NRIP1,ELK1,ESR1,UBE2I
p53 Signaling	6,94E00	2,08E-01	TP53 (includes EG:22059),WT1,PRKDC,TP63,PIK3C2A,TP73,HDAC1,MDM2,BAX,EP300,RB1,PCNA,MDM4,JUN,GSK3B,HIPK2,PML,BRCA1,CDK2,SIRT1
Glycolysis/Gluconeogenesis	6,62E00	1,45E-01	PGK1,PKM2,ACSL3,PKLR,GAPDH,LDHB,ADH5 (includes EG:11532),HK1,GPI,HK2,ENO1,ALDH3A2,DLAT,ALDH1A2,DLD,ALDOA,LDHA,ALDOC
DNA Methylation and Transcriptional Repression Signaling	6,38E00	3,91E-01	DNMT3A,CHD4,HDAC1,MTA2,SAP130,DNMT1,ARID4B,SAP18,RBBP4
14-3-3-mediated Signaling	5,87E00	1,74E-01	PIK3C2A,TP73,TUBB2C,PDIA3,TUBB2A,YWHAZ,VIM,BAX,TUBB,TUBB4,TUBA1B,TUBB2B,FOS,JUN,TUBA1A,TUBB6,YAP1 (includes EG:10413),PLCB3,GSK3B,ELK1,SNCA
PPAR Signaling	5,74E00	1,76E-01	PPARG,PPARA,STAT5A,NR1H3,IKBKE,NFKB2,PDGFC,EP300,FOS,HSP90B1,IKBKG,NFKBIA,JUN,HSP90AB1,NCOA1,HSP90AA1,NRIP1,RXRA
Huntington's Disease Signaling	5,22E00	1,24E-01	GNB2L1,HSPA5,CREB5,EP300,HSPA4,JUN,SP1,CREB1,IGF1R,TCERG1,SDHA (includes EG:157074),TP53 (includes EG:22059),UBB,HDAC4,PIK3C2A,HDAC1,HSPA9,CLTC,BAX,RCOR1,HSPA8,ATP5B,CASP2,HTT,PLCB3,CYCS,CAPN2,UBC,SNCA
RAN Signaling	4,97E00	3,04E-01	KPNB1,CSE1L,TNPO1,RANBP2,RAN,XPO1,RANGAP1
TR/RXR Activation	3,7E00	1,46E-01	AKR1C1/AKR1C2,PIK3C2A,MDM2,HIF1A,NCOA3,EP300,NCOA2,SREBF1,ENO1,SREBF2,FASN,NCOA1,TBL1XR1,RXRA
Protein Ubiquitination Pathway	3,65E00	1,06E-01	USP14,ANAPC1/LOC100286979,HSPA5,USP39,USO1,HSPA4,HSP90B1,HSP90AB1,PSMC6,BRCA1,UBB,DNAJC9,HSPH1,HSPA9,MDM2,HSPD1,PSMD3,HSPA8,ANAPC4,PSMC1,PSMD2,PSMD12,HSP90AA1,PSMD1,UBC,USP34,USP25,VHL,UBE2I
