# Supplementary material for: Strategies to Identify Recognition Signals and Targets of SUMOylation
Source: Biochem Res Int. 2012 Jul 1;2012:875148. doi: 10.1155/2012/875148 (PMC3395311; doi:10.1155/2012/875148)
Supplement: Supplementary file 9 [file 875148.f9.xls]

## Sheet: biomarkers
Supplementary table 6. Biomarkers and potential drug targets found in putative and real sumoylated proteins using IPA.
© 2000-2012 Ingenuity Systems, Inc. All rights reserved.
Symbol	Synonym(s)	Entrez Gene Name	GenPept/UniProt/Swiss-Prot Accession	Networks	Location	Type(s)	Biomarker Application(s)	Entrez Gene ID for Human	Entrez Gene ID for Mouse	Entrez Gene ID for Rat
alcohol dehydrogenase	ADH,alcohol dehydrogenase (NAD),alcohol:NAD oxidoreductase,aldehyde reductase,aliphatic alcohol dehydrogenase,ethanol dehydrogenase,NAD-dependent alcohol dehydrogenase,NAD-specific aromatic alcohol dehydrogenase,NADH-alcohol dehydrogenase,NADH-aldehyde dehydrogenase,primary alcohol dehydrogenase,yeast alcohol dehydrogenase	--	--	11	unknown	group	Safety,Unspecified Application
HSP90AA1	AL024080,AL024147,FLJ31884,Heat shock protein 1, alpha,hsp4,HSP86,Hsp86-1,HSP89,Hsp89-alpha-delta-N,HSP89A,Hsp90,HSP90 ALPHA,HSP90A,HSP90N,HSPC1,HSPCA,HSPCAL1,HSPCAL4,HSPN,LAP2,MGC105293	heat shock protein 90kDa alpha (cytosolic), class A member 1	P07900	7	Cytoplasm	enzyme	Safety,Unspecified Application	3320	15519	299331
CBR1	AW261796,Carbonyl Reductase,CBR,CR,CRN,hCBR1,MGC124927,Ocr,SDR21C1	carbonyl reductase 1	--	23	Cytoplasm	enzyme	Response to Therapy	873	12408	29224
RPS6	Gm13654,MGC102571,MGC103209,OTTMUSG00000013244,pp33,RIBOSOMAL PROTEIN S6,S6,S6R	ribosomal protein S6	P62753	5	Cytoplasm	other	Response to Therapy	6194	20104|667739	29304
CFLAR	2310024N18RIK,A430105C05Rik,AU021929,C-FLIP,c-FLIPR,CASH,CASP8AP1,Caspase 8 associated protein,CASPER,cFLIP short,CLARP,ENSMUSG00000072980,FLAME,FLAME-1,FLICE-LIKE IP,FLIP,Gm9845,I-FLICE,MGC103395,MGC108616,MRIT	CASP8 and FADD-like apoptosis regulator	O15519	18	Cytoplasm	other	Prognosis,Unspecified Application	8837	12633	117279
Cyclin A		--	--	14	Nucleus	group	Prognosis,Unspecified Application
XRCC5	AI314015,FLJ39089,KARP-1,KU (p70/p80) SUBUNIT,Ku large subunit,KU80,KU86,KUB2,Kup80,NFIV	X-ray repair complementing defective repair in Chinese hamster cells 5 (double-strand-break rejoining)	P13010	20	Nucleus	enzyme	Prognosis,Unspecified Application	7520	22596	363247
GART	Adenosine3,AIRS,FTRG,Gaps,GARFT,GARS,GARTF,MGC47764,PAIS,PGFT,PRGS	phosphoribosylglycinamide formyltransferase, phosphoribosylglycinamide synthetase, phosphoribosylaminoimidazole synthetase	P22102		Cytoplasm	enzyme	Prognosis,Safety	2618	14450	288259
GST	Glutathione s-transferase,GSH Transferase	--	--	15	Nucleus	complex	Prognosis,Safety
CDX2	CDX-3,CDX2/3	caudal type homeobox 2	Q99626	24	Nucleus	transcription regulator	Prognosis	1045	12591	66019
Fascin		--	--	1	Cytoplasm	group	Prognosis
FOSB	AP-1,DKFZp686C0818,fra-2,G0S3,GOS3,GOSB,KW3,MGC42291	FBJ murine osteosarcoma viral oncogene homolog B	--		Nucleus	transcription regulator	Prognosis	2354	14282	308411
FOSL2	FLJ23306,FRA-2	FOS-like antigen 2	P15408	16	Nucleus	transcription regulator	Prognosis	2355	14284	25446
FOXG1	2900064B05Rik,BF-1,BF1A,BF2,FHKL3,FKH2,FKHL1,FKHL2,FKHL3,FKHL4,Fkhr,FOXG1A,FOXG1B,FOXG1C,Foxo1,HBF-1,HBF-2,HBF-3,HBF-G2,Hfh9,Hfhbf1,HFK1,HFK2,HFK3,KHL2,QIN,RATBF1A	forkhead box G1	P55316	19	Nucleus	transcription regulator	Prognosis	2290	15228	24370
HK2	AI642394,DKFZp686M1669,HEXOKINASE 2,Hexokinase ii,HKII,HXK2,TYPE II HEXOKINASE	hexokinase 2	P52789	10	Cytoplasm	kinase	Prognosis	3099	15277	25059
HNRNPK	CSBP,FLJ41122,HNRPK,KBBP,MGC102032,NOVA,TUNP	heterogeneous nuclear ribonucleoprotein K	P61978	21	Nucleus	other	Prognosis	3190	15387	117282
IRF1 (includes EG:16362)	AU020929,IFN REGULATORY FACTOR 1,ISGF2,LSIR,MAR	interferon regulatory factor 1	P10914	22	Nucleus	transcription regulator	Prognosis	3659	16362	24508
KRT8	AA960620,AL022697,AU019895,CARD2,Ck A,CK8,CYK8,CYKER,CYTOKERATIN 8,Ecp,EndoA,K2C8,K8,Ker8,KERATIN 8,Keratin complex 2, basic, gene 8,KO,Krt-2.8,KRT2-8,MGC118110,Troma-1	keratin 8	P05787	1	Cytoplasm	other	Prognosis	3856	16691	25626
MCM6	ASP-l1,D1Wsu22e,KI-MCM6,MCG40308,Mcmd6,Mis5,MM6,P105MCM	minichromosome maintenance complex component 6	Q14566	14	Nucleus	enzyme	Prognosis	4175	17219	29685
MYOD1	AI503393,bHLHc1,MD1,MGC156574,MYF3,MYOD,PUM	myogenic differentiation 1	--		Nucleus	transcription regulator	Prognosis	4654	17927	337868
ORC5 (includes EG:26429)	AL033327,MmORC5,ORC5L,ORC5P,ORC5T	origin recognition complex, subunit 5	O43913	14	Nucleus	other	Prognosis	5001	26429	362304
PI3K (complex)	1-phosphatidylinositol 3-kinase,ATP:1-phosphatidyl-1D-myo-inositol 3-phosphotransferase,Phosphatidylinositol 3 kinase,phosphatidylinositol 3'-kinase,PI3-kinase,PtdIns 3 Kinase,type I phosphatidylinositol kinase,type III phosphoinositide 3-kinase,Vps34p	--	--	10	Cytoplasm	complex	Prognosis
PTPN1	MGC93562,PROTEIN-TYROSINE PHOSPHATASE,PTP,PTP-1B,PTP-HA2,PTP1B ALPHA,PTP1BB,Ptpase 1,PTPASE 1B,PTPASE HA2	protein tyrosine phosphatase, non-receptor type 1	P18031	15	Cytoplasm	phosphatase	Prognosis	5770	19246	24697
PTTG1	AW555095,C87862,EAP1,HPTTG,MGC126883,MGC138276,PDS1,Pituitary tumor transforming 1,PITUITARY TUMOR TRANSFORMING GENE PROTEIN1,PTTG,Pttg3,SECURIN,TUTR1	pituitary tumor-transforming 1	--		Nucleus	transcription regulator	Prognosis	9232	30939	64193
RSF1 (includes EG:233532)	4832420A03RIK,C030033M12RIK,Gm164,HBXAP,MGC90806,p325,XAP8	remodeling and spacing factor 1	Q96T23	7	Nucleus	transcription regulator	Prognosis	51773	233532	308839
RXRA	9530071D11RIK,FLJ00280,FLJ00318,FLJ16020,FLJ16733,MGC102720,NR2B1,RETINOID X RECEPTOR ALPHA,RXR,RXR ALPHA,RXRalpha1,RXRα	retinoid X receptor, alpha	P19793	9	Nucleus	ligand-dependent nuclear receptor	Prognosis	6256	20181	25271
SMAD4	AW743858,D18Wsu70e,DPC4,JIP,MADH4,Smaug1	SMAD family member 4	Q13485	19	Nucleus	transcription regulator	Prognosis	4089	17128	50554
SOX3	GHDX,MRGH,PHP,PHPX,SOXB	SRY (sex determining region Y)-box 3	--		Nucleus	transcription regulator	Prognosis	6658	20675	367950
TFAM	AI661103,Hmgts,MtTF1,MTTFA,TCF6,TCF6L1,TCF6L2,TCF6L3,Tfa,tsHMG	transcription factor A, mitochondrial	--		Cytoplasm	transcription regulator	Prognosis	7019	21780	83474
THOC1	3110002N20Rik,AW107452,HPR1,LRRGT00070,MGC28284,NMP-84,P84,P84N5	THO complex 1	Q96FV9	6	Nucleus	transcription regulator	Prognosis	9984	225160	291797
Ubiquitin	Polyubiquitin,Ub	--	--	13	Cytoplasm	group	Prognosis
WARS	GAMMA-2,IFI53,IFP53,TRPRS,TRYPTOPHANYL TRNA SYNTHETASE,WRS	tryptophanyl-tRNA synthetase	P23381	22	Cytoplasm	enzyme	Prognosis	7453	22375	314442
ZIC2	HPE5,KU	Zic family member 2	O95409	11	Nucleus	transcription regulator	Prognosis	7546	22772	361096
LDL	Beta Lipoprotein,Low density lipoprotein,Oxidised LDL	--	--	25	Plasma Membrane	complex	Efficacy,Unspecified Application
PDGF BB	Pdgfb dimer	--	--	19	Extracellular Space	complex	Efficacy,Unspecified Application
Creatine Kinase	adenosine triphosphate-creatine transphosphorylase,ATP:creatine N-phosphotransferase,ATP:creatine phosphotransferase,BB-CK,CK,CK-BB,CK-MB,CK-MM,CKMiMi,Cpk,Creatine Phosphokinase,creatine phosphotransferase,Creatinine kinase,Creatinine phosphokinase,MB-CK,Mi-CK,MiMi-CK,MM-CK,phosphocreatine kinase	--	--	6	unknown	group	Efficacy,Safety
Tubulin		--	--	10	Cytoplasm	complex	Efficacy,Response to Therapy
Cyclin D	CycD,Cyclin D1	--	--	14	Nucleus	group	Efficacy,Prognosis,Unspecified Application
GOT	2-oxoglutarate-glutamate aminotransferase,AAT,aspartate alpha-ketoglutarate transaminase,ASPARTATE AMINOTRANSFERASE,Aspartate transaminase,aspartate-2-oxoglutarate transaminase,aspartate:2-oxoglutarate aminotransferase,aspartic acid aminotransferase,aspartic aminotransferase,aspartyl aminotransferase,AspT,AST,glutamate oxaloacetate transaminase,glutamate-oxalacetate aminotransferase,glutamate-oxa…	--	--	22	unknown	group	Efficacy,Prognosis,Safety,Unspecified Application
FANCD2	2410150O07RIK,AU015151,BB137857,DKFZp762A223,FA-D2,FA4,FACD,FAD,FANCD,FLJ23826	Fanconi anemia, complementation group D2	Q9BXW9	14	Nucleus	other	Efficacy,Prognosis	2177	211651	312641
IgG	Auto IgG,CARIMUNE,Gamimune-N,Gamma globulin,Immunoglobulin G,immunoglobulins, G,POLYGAM	--	--	3	Plasma Membrane	complex	Efficacy,Prognosis
IL1	Interleukin 1	--	--	12	Extracellular Space	group	Efficacy,Prognosis
NCOA3	2010305B15RIK,ACTR,AIB-1,AIB1 DELTA3,AW321064,bHLHe42,CAGH16,CTG26,KAT13B,MGC141848,P/CIP,pCIP,RAC3,SRC-1,SRC-3,TNRC14,TNRC16,TRAM-1	nuclear receptor coactivator 3	Q9Y6Q9	20	Nucleus	transcription regulator	Efficacy,Prognosis	8202	17979	84584
SAA	A-saa,Amyloid A,SAA@,SERUM AMYLOID,Serum Amyloid A	--	--	21	Nucleus	group	Efficacy,Prognosis
ALDH	ALDEHYDE DEHYDROGENASE	--	--	21	Nucleus	group	Efficacy
Caspase	Caspase-1,ICE,interleukin 1 converting enzyme,interleukin 1beta-converting endopeptidase,interleukin 1beta-converting enzyme,interleukin-1beta convertase,interleukin-1beta precursor proteinase,precursor interleukin-1beta converting enzyme,pro-interleukin 1beta proteinase,prointerleukin 1beta protease,protease A,protease VII,YVADase	--	--	11	Cytoplasm	group	Efficacy
COL4A5	ASLN,ATS,CA54,Collagen iv alpha5,COLLAGEN TYPE IV, ISOTYPE 4,COLLAGEN TYPE IV, ISOTYPE 5,MGC167109,MGC42377,Procollagen iv alpha5,RGD1565499	collagen, type IV, alpha 5	--	23	Extracellular Space	other	Efficacy	1287	12830	363457
Cyclin B		--	--	14	Cytoplasm	group	Efficacy
EIF2S1	0910001O23Rik,2410026C18Rik,EIF-2,EIF-2A,EIF-2ALPHA,eIF-2α,Eukaryotic Translation Initiation Factor 2 Alpha Subunit,MGC93488	eukaryotic translation initiation factor 2, subunit 1 alpha, 35kDa	P05198		Cytoplasm	translation regulator	Efficacy	1965	13665	54318
ERK	p42/44 mapk	--	--	2	unknown	group	Efficacy
HDAC1	DKFZp686H12203,EG15181,ENSMUSG00000061062,Gm1824,GON-10,HD1,HDAC,Hdac1-ps,HISTONE DEACETYLASE-1,MGC102534,MGC118085,MommeD5,RPD3,RPD3L1	histone deacetylase 1	Q13547	12	Nucleus	transcription regulator	Efficacy	3065	433759	297893
HSPA4	AI317151,APG-2,HS24/P52,HSP110,HSP70,Hsp70RY,HSPH2,irp94,KIAA4025,MGC131852,mKIAA4025,RY	heat shock 70kDa protein 4	P34932	7	Cytoplasm	other	Efficacy	3308	15525	266759
INHA	AW555078,INHIBIN A,Inhibin Alpha,MGC93593	inhibin, alpha	--	23	Extracellular Space	growth factor	Efficacy	3623	16322	24504
MAP4	AA407148,DKFZp779A1753,MGC8617,MTAP4	microtubule-associated protein 4	P27816		Cytoplasm	other	Efficacy	4134	17758	367171
NR3C1	GCCR,GCR,GCR ALPHA,GLUCOCORTICOID RECEPTOR,GLUCOCORTOCOID RECEPTOR,GR,Gr alpha,Gr beta,GR-A,GRL,Grl-1,HGR,Type ii corticosteroid receptor	nuclear receptor subfamily 3, group C, member 1 (glucocorticoid receptor)	P04150	9	Nucleus	ligand-dependent nuclear receptor	Efficacy	2908	14815	24413
Pdgfr	PDGF Receptor	--	--	24	Plasma Membrane	group	Efficacy
Pkc(s)	Cnpkc,PKC,Pkc(s),Protein Kinase C	--	--	24	Cytoplasm	group	Efficacy
Tnf receptor	TNF R1,Tnf receptor superfamily,TNFR	--	--	18	Plasma Membrane	group	Efficacy
TUBB	AA408537,AI596182,B130022C14RIK,Beta tubulin,Beta tubulin 1,M(beta)5,M40,MGC117247,MGC16435,OK/SW-CL.56,TUBB1,TUBB5,TUBULIN BETA 5	tubulin, beta	P07437	10	Cytoplasm	other	Efficacy	203068	22154	29214
VASP	AA107290,MGC127789	vasodilator-stimulated phosphoprotein	P50552		Plasma Membrane	other	Efficacy	7408	22323	361517
NPM1	B23,B23.1,B23NP,MGC102162,MGC104254,MGC107291,MGC108517,NO38,NPM,Nucleolar protein B23.2,NUCLEOPHOSMIN,NUMATRIN	nucleophosmin (nucleolar phosphoprotein B23, numatrin)	P06748	17	Nucleus	transcription regulator	Disease Progression,Unspecified Application	4869	18148	25498
CDK2	A630093N05Rik,CDC2,CDC2-RELATED KINASE,Cyclin A associated kinase,CYCLIN E ASSOCIATED KINASE,CYCLIN E-DEPENDENT KINASE,p33(CDK2),p33CDK2	cyclin-dependent kinase 2	P24941	14	Nucleus	kinase	Disease Progression,Prognosis	1017	12566	362817
E2F1	E2f,KIAA4009,mKIAA4009,RBAP1,RBBP3,RBP3	E2F transcription factor 1	--		Nucleus	transcription regulator	Disease Progression,Prognosis	1869	13555	399489
EPAS1	bHLHe73,ECYT4,HIF-2ALPHA,Hif1alpha related factor,Hif2,HIF2A,HLF,HRF,MOP2,PASD2	endothelial PAS domain protein 1	Q99814	16	Nucleus	transcription regulator	Disease Progression,Prognosis	2034	13819	29452
MCM4	19G,AI325074,AU045576,CDC21,CDC21 homolog,CDC54,hCdc21,KIAA4003,mcdc21,Mcmd4,MGC33310,mKIAA4003,P1-CDC21	minichromosome maintenance complex component 4	P33991	14	Nucleus	enzyme	Disease Progression,Prognosis	4173	17217	29728
BAX	Bcl2-associated X,BCL2L4	BCL2-associated X protein	Q07812	11	Cytoplasm	transporter	Disease Progression,Efficacy,Prognosis,Unspecified Application	581	12028	24887
Collagen type IV	COL4,collagen IV	--	--	16	unknown	complex	Disease Progression
MCM5	AA617332,AI324988,AL033333,CDC46,mCD46,mCDC46,Mcmd5,MGC5315,P1-CDC46	minichromosome maintenance complex component 5	P33992	14,25	Nucleus	enzyme	Disease Progression	4174	17218	291885
PLAGL2	AU018672,AW552839,FLJ23283,mKIAA0198,PLEOMORPHIC ADENOMA GENE-LIKE 2,ZNF900	pleiomorphic adenoma gene-like 2	Q9UPG8	3	Nucleus	transcription regulator	Disease Progression	5326	54711	296281
SLC39A6	Ermelin,LIV-1	solute carrier family 39 (zinc transporter), member 6	Q13433	15	Plasma Membrane	transporter	Disease Progression	25800	106957	291733
TMPO	5630400D24Rik,AI195756,AI606875,AW214352,AW547477,CMD1T,LAP2,LEMD4,MGC61508,PRO0868,TP,TP alpha,TP beta/gamma	thymopoietin	P42167	18	Nucleus	other	Disease Progression	7112	21917	25359
UBE2I	5830467E05Rik,C358B7.1,F830028O17RIK,MGC105476,Mubc,P18,SUMO E2,UBC9,UbcE2A,Ubce2i,Ubce9	ubiquitin-conjugating enzyme E2I	P63279	2	Nucleus	enzyme	Disease Progression	7329	22196	25573
ANXA2	ANNEXIN A2,ANNEXIN II,ANNEXIN2,ANX2,ANX2L4,AW215814,CAL1H,Calpactin-1 heavy chain,LIP2,LIPOCORTIN2,LPC2,LPC2D,P36,PAP-IV	annexin A2	P07355	6	Plasma Membrane	other	Diagnosis,Unspecified Application	302	12306	56611
CA2	AI131712,CA-II,CAR2,Carbonic anhydrase 2,Ltw-5,Lvtw-5	carbonic anhydrase II	P00918	4	Cytoplasm	enzyme	Diagnosis,Unspecified Application	760	12349	54231
PKM2	AA414905,AL024370,AL024424,CTHBP,m-Pk,M2-Pk,MGC3932,OIP3,Pk-2,PK3,PKM,PKM12,Pyruvate kinase 3,Pyruvate kinase M,TCB,THBP1	pyruvate kinase, muscle	P14618		Cytoplasm	kinase	Diagnosis,Unspecified Application	5315	18746	25630
S100A9	60B8AG,AW546964,BEE22,CAGB,calgranulin B,CFAG,CGLB,GAGB,L1AG,Leukocyte l1 complex heavy chain,LIAG,MAC387,MIF,MIGRATION INHIBITORY FACTOR RELATED PROTEIN 14,MRP14,NIF,P14	S100 calcium binding protein A9	P06702	24	Cytoplasm	other	Diagnosis,Unspecified Application	6280	20202	94195
ANXA1	ANNEXIN 1,ANNEXIN A1,ANX1,C430014K04RIK,Lc1,Lipocortin,LIPOCORTIN1,LPC1,P35	annexin A1	P04083		Plasma Membrane	other	Diagnosis,Prognosis,Unspecified Application	301	16952	25380
JUN	Activator protein 1,AP-1,API-1,c-Fos,C-JUN,JUNC,LOC100288387,LOC100291417,LOC100293034,v-Jun,V-jun Avian Sarcoma Virus 17 Oncogene Homolog,V-jun Sarcoma Virus 17 Oncogene Homolog	jun proto-oncogene	P05412	14	Nucleus	transcription regulator	Diagnosis,Prognosis	3725	16476	24516
PPARA	4933429D07Rik,AI118064,AW742785,hPPAR,MGC2237,MGC2452,NR1C1,PPAR,PPAR ALPHA,PPARα	peroxisome proliferator-activated receptor alpha	Q07869	6	Nucleus	ligand-dependent nuclear receptor	Diagnosis,Prognosis	5465	19013	25747
RARA	ALPHA RAR,NR1B1,PLZF-RARα,RAR,RAR ALPHA,RAR ALPHA 1,RARα,RETINOIC ACID RECEPTOR ALPHA	retinoic acid receptor, alpha	P10276	5	Nucleus	ligand-dependent nuclear receptor	Diagnosis,Prognosis	5914	19401	24705
SOX2	ANOP3,lcc,MCOPS3,MGC2413,RGD1565646,Sry-2,ysb	SRY (sex determining region Y)-box 2	--		Nucleus	transcription regulator	Diagnosis,Prognosis	6657	20674	499593
TFAP2A	activating enhancer-binding protein 2 alpha,Activator protein-2,AP 2A,AP-2,AP-2ALPHA,AP2B,AP2TF,BOFS,CUP,FLJ51761,TCFAP2A,TFAP2	transcription factor AP-2 alpha (activating enhancer binding protein 2 alpha)	--		Nucleus	transcription regulator	Diagnosis,Prognosis	7020	21418	306862
Top2	DNA Topoisomerase II,Topo II,Topo2,topoisomerase II,Topoisomerase2	--	--	2	unknown	group	Diagnosis,Prognosis
TRPS1	AI115454,AI447310,D15Ertd586e,GC79,LGCR,MGC107472,MGC134928,MGC46754	trichorhinophalangeal syndrome I	Q9UHF7		Nucleus	transcription regulator	Diagnosis,Prognosis	7227	83925	299897
APP	AAA,Abetapp,Abpp,AD1,Adap,Ag,Amyloid betaA4 precursor protein,Amyloid precursor,amyloid-beta-protein,Amyloidogenic glycoprotein,APP isoform 1,APPI,appican,CTFgamma,CVAP,E030013M08RIK,Nexin II,P3,PN-II,PN2,PreA4,PROTEASE NEXIN2	amyloid beta (A4) precursor protein	P05067	11	Plasma Membrane	other	Diagnosis,Efficacy,Unspecified Application	351	11820	54226
E2F3	DKFZp686C18211,E2F3A,KIAA0075,LOC691420,MGC104598,mKIAA0075,RGD1561600	E2F transcription factor 3	--		Nucleus	transcription regulator	Diagnosis,Efficacy,Unspecified Application	1871	13557	291105
KITLG	C-KIT LIGAND,Clo,CON,contrasted,DKFZp686F2250,FPH2,Gb,KIT LIGAND,KITL,Kl,KL-1,Mast cell factor,MGF,SCF,SCF RECEPTOR LIGAND,Scf164,SF,SHEP7,SL,SLF,STEEL,STEEL FACTOR,Stem cell factor	KIT ligand	--	23	Extracellular Space	growth factor	Diagnosis,Efficacy,Unspecified Application	4254	17311	60427
KRT5	3300001P10Rik,AW146334,CK5,Cytokeratin 5,DDD,EBS2,K5,KERATIN 5,Krt2-5,KRT5A,Sak57,Tfip8	keratin 5	P13647	1	Cytoplasm	other	Diagnosis,Efficacy,Unspecified Application	3852	110308	369017
hemoglobin	haemoglobin,Hb	--	--	12	unknown	complex	Diagnosis,Efficacy,Safety,Unspecified Application
TP73	P73,p73RhoGAP,TRP73	tumor protein p73	O15350	13	Nucleus	transcription regulator	Diagnosis,Efficacy,Safety	7161	22062	362675
beta-estradiol	(8R,9S,13S,14S,17S)-13-methyl-6,7,8,9,11,12,14,15,16,17-decahydrocyclopenta[a]phenanthrene-3,17-diol,1,3,5(10)-estratriene-3,17beta-diol,17-beta-E2,17-beta-estradiol,17-beta-oestradiol,50-28-2,Aerodiol,Agofollin,Alora,Altrad,Amnestrogen,Aquadiol,Bardiol,C18H24O2,Climaderm,Climara,Compudose,Compudose 200,Compudose 365,Corpagen,Dermestril,Dihydromenformon,Dihydrotheelin,Dimenformon,Dimenformon Prol…	--	--	25	unknown	chemical - endogenous mammalian	Diagnosis,Efficacy,Response to Therapy,Safety
PGR (includes EG:18667)	9930019P03Rik,BB114106,ENSMUSG00000074510,LOC360433,NR3C3,Pgrb,PR,PR BETA,PROGESTERONE RECEPTOR,Progesterone receptor A	progesterone receptor	P06401	16	Nucleus	ligand-dependent nuclear receptor	Diagnosis,Efficacy,Response to Therapy	5241	18667	25154
TOP2A	DNA TOPOISOMERASE II ALPHA,TOP2,TOPO II,TOPO2 ALPHA,TOPOISOMERASE II ALPHA,TP2A	topoisomerase (DNA) II alpha 170kDa	P11388	2	Nucleus	enzyme	Diagnosis,Efficacy,Response to Therapy	7153	21973	360243
PPARG	CIMT1,GLM1,NR1C3,PPAR GAMMA 3,PPAR-GAMMA,PPARG1,PPARγ,PPFP	peroxisome proliferator-activated receptor gamma	P37231	15	Nucleus	ligand-dependent nuclear receptor	Diagnosis,Efficacy,Prognosis,Unspecified Application	5468	19016	25664
RB1	OSRC,p105,p105-Rb,p110 RB,pp110,PRB,RB,RB-ASSOCIATED,RETINOBLASTOMA	retinoblastoma 1	P06400	17	Nucleus	transcription regulator	Diagnosis,Efficacy,Prognosis,Unspecified Application	5925	19645	24708
TP63	AI462811,AIS,B(p51A),B(p51B),CLIMP63,DELTA N p63,Delta N p63 Alpha,EEC3,KET,LMS,MGC115972,NBP,OFC8,p40,p51,P51/P63,p53CP,P63,p63 alpha isoform,p63 gamma isoform,p73H,P73L,RHS,SHFM4,TAp63,TP53CP,TP53L,TP73L,Trp53rp1,TRP63,TUMOR PROTEIN 63 KDA WITH STRONG HOMOLOGY TO P53	tumor protein p63	Q9H3D4	13	Nucleus	transcription regulator	Diagnosis,Efficacy,Prognosis,Unspecified Application	8626	22061	246334
ALB	ALB1,ALBUMIN,Albumin 1,Albumin isomer 1,Albumin isomer 2,Albumin isomer 3,Albza,DKFZp779N1935,human albumin,PRO0883,PRO0903,PRO1341,SA,SERUM ALBUMIN,SERUM ALBUMIN CHAIN A,Serum albumin precursor	albumin	P02768	12	Extracellular Space	transporter	Diagnosis,Efficacy,Prognosis,Safety,Unspecified Application	213	11657	24186
Alp	alkaline phenyl phosphatase,Alkaline Phosphatase,alkaline phosphohydrolase,alkaline phosphomonoesterase,Ap,glycerophosphatase,orthophosphoric-monoester phosphohydrolase (alkaline optimum),phosphomonoesterase	--	--	9	unknown	group	Diagnosis,Efficacy,Prognosis,Safety,Unspecified Application
MYC	AU016757,bHLHe39,C-MYC,C-MYC-P64,MGC105490,MGC138120,mMyc,MRTL,Myc2,Niard,Nird,RNCMYC	v-myc myelocytomatosis viral oncogene homolog (avian)	--	25	Nucleus	transcription regulator	Diagnosis,Efficacy,Prognosis,Response to Therapy,Unspecified Application	4609	17869	24577
BRCA1	BRCA1 (LACKING EXON 11),BRCAI,BRCC1,BROVCA1,IRIS,PNCA4,PSCP,RNF53	breast cancer 1, early onset	P38398	14	Nucleus	transcription regulator	Diagnosis,Efficacy,Prognosis,Response to Therapy	672	12189	497672
HIF1A	AA959795,bHLHe78,HIF-1ALPHA,HIF-1α,HIF-1α (hydroxylated),HIF1,Hypoxia inducible factor 1 alpha subunit,MOP1,PASD8	hypoxia inducible factor 1, alpha subunit (basic helix-loop-helix transcription factor)	Q16665	16	Nucleus	transcription regulator	Diagnosis,Efficacy,Prognosis,Response to Therapy	3091	15251	29560
IGF1R	A330103N21RIK,CD221,D930020L01,hyft,IGF-IR,IGF1 RECEPTOR,Igf1r beta,Igf1r beta isoform,IGFIRC,IGFR,IGFR1,JTK13,LOC51049,MGC142170,MGC142172,MGC18216,NM1	insulin-like growth factor 1 receptor	P08069	19	Plasma Membrane	transmembrane receptor	Diagnosis,Efficacy,Prognosis,Response to Therapy	3480	16001	25718
Ras	p21 Ras	--	--	13	Cytoplasm	group	Diagnosis,Efficacy,Prognosis,Response to Therapy
FASN	A630082H08Rik,FAS,FATTY ACID SYNTHASE,FATTY ACID SYNTHETASE,Long chain fatty acyl-coa synthetase,MGC14367,MGC15706,NADP Dependent Oxidoreductase,OA-519,SDR27X1	fatty acid synthase	P49327	12	Cytoplasm	enzyme	Diagnosis,Efficacy,Prognosis	2194	14104	50671
FOS	AP-1,C-FOS,D12Rfj1,p55,V-FOS	FBJ murine osteosarcoma viral oncogene homolog	P01100	4	Nucleus	transcription regulator	Diagnosis,Efficacy,Prognosis	2353	14281	314322
PARP1	5830444G22Rik,Adprp,Adprp1,ADPRT,ADPRT 1,AI893648,C80510,MGC93658,PADPRT,pADPRT-1,PARP,PARS,POLY(ADP-RIBOSE) POLYMERASE 1,PPOL,sPARP-1	poly (ADP-ribose) polymerase 1	P09874	11	Nucleus	enzyme	Diagnosis,Efficacy,Prognosis	142	11545	25591
STAT1	2010005J02Rik,AA408197,CANDF7,DKFZp686B04100,ISGF-3,p91,STAT1 ALPHA,Stat1 beta,Stat1 p91,STAT91,TRANSCRIPTION FACTOR SIGNAL TRANSDUCER AND ACTIVATOR	signal transducer and activator of transcription 1, 91kDa	P42224	22	Nucleus	transcription regulator	Diagnosis,Efficacy,Prognosis	6772	20846	25124
STAT3	1110034C02Rik,acute-phase response factor,APRF,AW109958,FLJ20882,HIES,MGC128731,MGC16063,MGC93551,Stat3 alpha isoform,Stat3 beta isoform,Stat3 delta,Stat3 protein	signal transducer and activator of transcription 3 (acute-phase response factor)	P40763	22	Nucleus	transcription regulator	Diagnosis,Efficacy,Prognosis	6774	20848	25125
VIM	FLJ36605,MGC102095,MGC139781,PAL-E,VIMENTIN	vimentin	P08670	1	Cytoplasm	other	Diagnosis,Efficacy,Prognosis	7431	22352	81818
GSK3B	7330414F15Rik,8430431H08Rik,C86142,GSK-3,GSK-3BETA,GSK-3β,Gsk-beta,GSKβ,Tpk1	glycogen synthase kinase 3 beta	P49841	18	Nucleus	kinase	Diagnosis,Efficacy	2932	56637	84027
KRT17	CK17,K17,Ka17,KERATIN 17,KRT1-17,PC,PC2,PCHC1	keratin 17	Q04695	1	Cytoplasm	other	Diagnosis,Efficacy	3872	16667	287702
Mmp	Matrix Metalloproteinase,MATRIX METALLOPROTEINASES,mmp (Matrix Metalloproteinase),mmpi,MMPs,Mt-mmp	--	--	19	Nucleus	group	Diagnosis,Efficacy
NANOG	2410002E02Rik,ecat4,ENK,LOC100038891,LOC100293888	Nanog homeobox	--		Nucleus	transcription regulator	Diagnosis,Efficacy	79923	71950	414065
PLA2G7	LDL-PLA2,LP-PLA2,Lyso-Paf Acetyltransferase,MGC95107,PAF ACETYLHYDROLASE,PAF-AH,PAFAH MP,Plasma paf-ah,R75400	phospholipase A2, group VII (platelet-activating factor acetylhydrolase, plasma)	--	23	Extracellular Space	enzyme	Diagnosis,Efficacy	7941	27226	301265
PPARGC1A	A830037N07RIK,ENSMUSG00000079510,Gm11133,LEM6,Peroxisome Proliferator-Activating Receptor Gamma Coactivator 1 Alpha,PGC-1,PGC-1(alpha),Pgc-1alpha-a,PGC-1v,PGC-1α,PGC1 ALPHA,PGC1A,PGCO1,PPARGC-1 alpha,PPARGC1	peroxisome proliferator-activated receptor gamma, coactivator 1 alpha	--		Nucleus	transcription regulator	Diagnosis,Efficacy	10891	19017	83516
TOP1	Ab2-086,AI467334,D130064I21RIK,DNA topoisomerase type I,Scl70,TOPI,TOPO I,TOPO-1,TOPOISOMERASE I	topoisomerase (DNA) I	P11387	9	Nucleus	enzyme	Diagnosis,Efficacy	7150	21969	64550
TUBA1B	K ALPHA 1-TUBULIN,K-ALPHA-1,MGC102558,MGC117866,MGC118411,RGD1565476,Tuba2	tubulin, alpha 1b	P68363	10	Cytoplasm	other	Diagnosis,Efficacy	10376	22143	500929
VHL	HRCA1,PVHL,PVHL30,RCA1,VHL1,VHLH	von Hippel-Lindau tumor suppressor	P40337	16	Nucleus	other	Diagnosis,Efficacy	7428	22346	24874
XPO1	AA420417,CRM1,CRMA,CRMI,DKFZp686B1823,emb,Exp1,EXPORTIN 1	exportin 1 (CRM1 homolog, yeast)	O14980	2	Nucleus	transporter	Diagnosis,Efficacy	7514	103573	85252
GAPDH	G3PD,G3PDH,GAPD,Glyceraldehyde-3-phosphate Dehydrogenase,LOC100048438,LOC685186,LOC686275,LOC689689,MGC102544,MGC102546,MGC103190,MGC103191,MGC105239,MGC127711,MGC88685,NUCLEAR URACIL DNA GLYCOSYLASE,OTTMUSG00000014946,RGD1565368	glyceraldehyde-3-phosphate dehydrogenase	P04406	16	Cytoplasm	enzyme	Diagnosis,Disease Progression,Unspecified Application	2597	100043349	500983|689689|24383|685186
PCNA	MGC8367,Pcna/cyclin,PCNAR	proliferating cell nuclear antigen	P12004	15	Nucleus	enzyme	Diagnosis,Disease Progression,Prognosis,Response to Therapy	5111	18538	25737
CEBPA	C/EBP ALPHA,C/EBP ALPHA P30,C/EBP ALPHA P42,C/EBP-α,C/ERB,CBF-A,CEBP,Cebp Alpha,CEBPα,DBPCEP,p42,Zinc Finger Homeobox 1b	CCAAT/enhancer binding protein (C/EBP), alpha	--		Nucleus	transcription regulator	Diagnosis,Disease Progression,Prognosis	1050	12606	24252
FOXA1	HNF3 ALPHA,HNF3A,MGC33105,TCF3A,Transcription Factor 3a	forkhead box A1	--		Nucleus	transcription regulator	Diagnosis,Disease Progression,Prognosis	3169	15375	25098
SNCA	AD AMYLOID,ALPHA SYNUCLEIN,ALPHASYN,ASYN,MGC105443,MGC110988,NACP,PARK1,PARK4,PD1,SYNUCLEIN ALPHA,Synuclein-α	synuclein, alpha (non A4 component of amyloid precursor)	P37840	13	Cytoplasm	other	Diagnosis,Disease Progression,Prognosis	6622	20617	29219
WT1	AWT1,D630046I19RIK,EWS-WT1,GUD,NPHS4,WAGR,WIT-2,WT,WT33	Wilms tumor 1	P19544	1	Nucleus	transcription regulator	Diagnosis,Disease Progression,Prognosis	7490	22431	24883
LDHA	GSD11,I lactate dehydrogenase (m chain),l7R2,lactate dehydrogenase 1 A chain,Lactate dehydrogenase 5,Lactate dehydrogenase a,LACTATE DEHYDROGENASE M4,LDH muscle subunit,LDH-M,LDH1,LDH5,M-Ldh,PIG19,RGD1562690	lactate dehydrogenase A	P00338	3	Cytoplasm	enzyme	Diagnosis,Disease Progression,Efficacy,Prognosis,Unspecified Application	3939	16828	500965|24533
MCM2	AA959861,AW476101,BM28,CCNL1,cdc19,CDCL1,D3S3194,KIAA0030,Mcmd2,MGC10606,MITOTIN,mKIAA0030	minichromosome maintenance complex component 2	P49736	14	Nucleus	enzyme	Diagnosis,Disease Progression,Efficacy,Prognosis,Unspecified Application	4171	17216	312538
Fibrinogen	FG	--	--	6	Plasma Membrane	complex	Diagnosis,Disease Progression,Efficacy,Prognosis,Safety
MKI67	D630048A14Rik,KI-67,KIA,MIB1,MIKI67A,MKI67A	antigen identified by monoclonal antibody Ki-67	P46013	8	Nucleus	other	Diagnosis,Disease Progression,Efficacy,Prognosis,Response to Therapy,Unspecified Application	4288	17345	291234
TP53 (includes EG:22059)	bbl,bfy,bhy,FLJ92943,LFS1,MGC112612,p44,P53,TRP53	tumor protein p53	P04637	8	Nucleus	transcription regulator	Diagnosis,Disease Progression,Efficacy,Prognosis,Response to Therapy,Unspecified Application	7157	22059	24842
Vegf	VEGF mRNA	--	--	17	Cytoplasm	group	Diagnosis,Disease Progression,Efficacy,Prognosis,Response to Therapy,Safety,Unspecified Application
Akt	AKT/PKB,B/Akt,Pkb,Protein Kinase B,Protein kinase B/akt,RAC-PK,Rac/Pkb	--	--	5	Cytoplasm	group	Diagnosis,Disease Progression,Efficacy,Prognosis,Response to Therapy,Safety
CDKN2A	Arf,ARF-INK4a,CDK4I,CDKN2,CMM2,CYCLIN-DEPENDENT KINASE INHIBITOR 2A,INK4,INK4A,INK4a-ARF,Ink4a/Arf,MLM,MTS-1,P14,p14/ARF,P14ARF,p14ARF/ p16INK4a,P16,p16(INK4a),P16-INK4A,p16/ INK4a,p16Cdkn2a,P16INK4,P19,p19ARF,PCTR1,TP16	cyclin-dependent kinase inhibitor 2A (melanoma, p16, inhibits CDK4)	--		Nucleus	transcription regulator	Diagnosis,Disease Progression,Efficacy,Prognosis,Response to Therapy,Safety	1029	12578	25163
ESR1	AA420328,Alpha estrogen receptor,AU041214,DKFZp686N23123,ER,ER ALPHA,Er alpha (46 kDa isoform),ER-α,ER66,ERA,ER[a],ESR,ESRA,ESTR,ESTRA,ESTROGEN RECEPTOR ALPHA,ESTROGEN RECEPTOR1,NR3A1,RNESTROR,TERP-1	estrogen receptor 1	P03372	9	Nucleus	ligand-dependent nuclear receptor	Diagnosis,Disease Progression,Efficacy,Prognosis,Response to Therapy	2099	13982	24890
Estrogen Receptor	ER	--	--	9	unknown	group	Diagnosis,Disease Progression,Efficacy,Prognosis,Response to Therapy
Mapk	MAP Kinase,NGF/EGF DEPENDENT KINASE	--	--	16	Cytoplasm	group	Diagnosis,Disease Progression,Efficacy,Prognosis,Response to Therapy
MSH2	AI788990,COCA1,FCC1,HNPCC,HNPCC1,LCFS2	mutS homolog 2, colon cancer, nonpolyposis type 1 (E. coli)	P43246	7	Nucleus	enzyme	Diagnosis,Disease Progression,Efficacy,Prognosis,Response to Therapy	4436	17685	81709
TYMS	HST422,MGC156654,MGC88736,THYMIDYLATE SYNTHASE,TMS,TS	thymidylate synthetase	P04818	17	Nucleus	enzyme	Diagnosis,Disease Progression,Efficacy,Prognosis,Response to Therapy	7298	22171	29261
AR	AIS,Andr,ANDROGEN RECEPTOR,AW320017,DHTR,HUMARA,HYSP1,KD,NR3C4,SBMA,SMAX1,Testosterone receptor,TFM	androgen receptor	P10275	19	Nucleus	ligand-dependent nuclear receptor	Diagnosis,Disease Progression,Efficacy,Prognosis	367	11835	24208
CDH1	AA960649,Arc-1,Cadherin 1,Cadherin E,CD324,CDHE,CSEIL,E-CADHERIN,E-CADHERIN 120 KDA,ECAD,L-CAM,MGC107495,Um,UVO,uvomorulin	cadherin 1, type 1, E-cadherin (epithelial)	--	23	Plasma Membrane	other	Diagnosis,Disease Progression,Efficacy,Prognosis	999	12550	83502
Cytokeratin		--	--	1	unknown	group	Diagnosis,Disease Progression,Efficacy,Prognosis
MDM2	1700007J15Rik,AA415488,HDM2,HDMX,MDM2-A1,MGC5370,MGC71221,Transformed mouse 3t3 cell double minute 2	Mdm2 p53 binding protein homolog (mouse)	Q00987	13	Nucleus	transcription regulator	Diagnosis,Disease Progression,Efficacy,Prognosis	4193	17246	314856
NFkB (complex)	NF-KAPPA B,NF-κB	--	--	1	Nucleus	complex	Diagnosis,Disease Progression,Efficacy,Prognosis
GATA4	ASD2,MGC126629	GATA binding protein 4	--		Nucleus	transcription regulator	Diagnosis,Disease Progression	2626	14463	54254
KRT1	CK1,EHK,EHK1,EPPK,K1,Kb1,KERATIN 1,Keratin 2-1,Keratin complex 2 basic gene 1,KERATIN, 67K TYPE II CYTOSKELETAL,Krt-2.1,KRT1A,KRT2-1,Krt86,NEPPK	keratin 1	P04264	1	Cytoplasm	other	Diagnosis,Disease Progression	3848	16678	300250
POU5F1	MGC22487,OCT-4,OCT3,OCT3/4,OTF-3,Otf3-rs7,Otf3g,OTF4	POU class 5 homeobox 1	Q01860	9	Nucleus	transcription regulator	Diagnosis,Disease Progression	5460	18999	294562
PROX1	A230003G05RIK	prospero homeobox 1	Q92786	16	Nucleus	transcription regulator	Diagnosis,Disease Progression	5629	19130	305066
ANXA5	ANAV,Annexin A5,ANNEXIN-V,ANX5,ENX2,LC5,MGC126971,MGC93655,PP4,R74653	annexin A5	P08758	22	Plasma Membrane	other	Diagnosis	308	11747	25673
CCT6A	CCT-zeta,CCT-zeta-1,CCT6,Cctz,Cctz-1,Chaperonin 6a,HTR3,LOC100038887,MGC125121,MGC126214,MGC126215,MoDP-2,TCP-1-zeta,TCP20,TCPZ,TTCP20	chaperonin containing TCP1, subunit 6A (zeta 1)	P40227	10	Cytoplasm	other	Diagnosis	908	12466	288620
Collagen type I	Cn1,COL1,Collagen I,Collagen Type1,Collagen1,TYPE 1 COLLAGEN,TYPE I COLLAGEN	--	--	16	unknown	complex	Diagnosis
DDX3X	D1Pas1-rs2,DBX,DDX14,DDX3,Fibroblast growth factor inducible 14,FIN14,Fn14,HLP2	DEAD (Asp-Glu-Ala-Asp) box polypeptide 3, X-linked	O00571	5	Nucleus	enzyme	Diagnosis	1654	13205	317335
DHCR7	7-DEHYDROCHOLESTEROL REDUCTASE,7-DHC reductase,7DHCR,AA409147,D7SR,FLJ10664,MGC93039,SLOS,STEROL DELTA7-REDUCTASE	7-dehydrocholesterol reductase	Q9UBM7	6	Cytoplasm	enzyme	Diagnosis	1717	13360	64191
DNMT1	AIM,CXXC9,Cytosine 5-methyltransferase,DMT,DNA METHYLTRANSFERASE 1,DNA MTASE,DNA MTase HsaI,DNMT,Dnmt1o,FLJ16293,HSN1E,m.MmuI,MCMT,Met-1,MGC104992,MommeD2,MTase	DNA (cytosine-5-)-methyltransferase 1	P26358	22	Nucleus	enzyme	Diagnosis	1786	13433	84350
ENO1	0610008I15,AL022784,ALPHA ENOLASE,EG433182,ENO1L1,ENOLASE,ENOLASE 1,Enolase 1 alpha,Enolase alpha,Gm5506,MBP-1,MGC103111,MGC107267,MPB1,NNE,Phosphopyruvate hydratase,PPH	enolase 1, (alpha)	P06733	16,25	Cytoplasm	transcription regulator	Diagnosis	2023	13806|433182	24333
EPHX1	AI195553,Ehm,Eph-1,EPHX,EPOX,Epoxide Hydrolase,EPXH1,HYL1,MEH,MEH8,Microsomal Colinesterase,MICROSOMAL EPOXIDE HYDROLASE	epoxide hydrolase 1, microsomal (xenobiotic)	P07099	15	Cytoplasm	peptidase	Diagnosis	2052	13849	25315
FLNC	1110055E19RIK,ABP-280,ABP280A,ABPA,ABPL,FILAMIN GAMMA,FLJ10186,FLN2,GAMMA FILAMIN,MFM5,MPD4	filamin C, gamma	Q14315	21	Cytoplasm	other	Diagnosis	2318	68794	362332
GATA6	AA410133	GATA binding protein 6	Q92908	17	Nucleus	transcription regulator	Diagnosis	2627	14465	29300
HIC1	AA408311,ZBTB29,ZNF901	hypermethylated in cancer 1	Q14526		Nucleus	transcription regulator	Diagnosis	3090	15248	303310
HOXA9	ABD-B,D6a9,HOX1,HOX1.7,HOX1G,Hox1r5,Hoxa7,MGC1934	homeobox A9	P31269	3	Nucleus	transcription regulator	Diagnosis	3205	15405	500126
HSPA8	2410008N15Rik,HEAT SHOCK COGNATE 71-KDA,HEAT SHOCK PROTEIN 8,HS7C,HSC54,HSC70,HSC71,HSC73,Hsp 8,HSP/C70,HSP70,HSP71,HSP73,HSPA10,IDBP1,LAP1,LOC624853,MGC102007,MGC106514,MGC114311,MGC118485,MGC128130,MGC131511,MGC29929,NIP71	heat shock 70kDa protein 8	P11142	7	Cytoplasm	enzyme	Diagnosis	3312	15481	24468
HSPB1	ACTIN POLYMERIZATION INHIBITOR,CMT2F,DKFZp586P1322,heat shock protein 1,Heat shock protein 1 beta,HMN2B,HS.76067,Hsb1,HSP25,HSP27,HSP28,SRP27	heat shock 27kDa protein 1	--	25	Cytoplasm	other	Diagnosis	3315	15507	24471
IGF2BP3	2610101N11Rik,AA522010,Ab2-255,AL022933,AU045931,CT98,DKFZp686F1078,IMP-3,KOC1,Koc13,MGC61294,mimp3,Neilsen,RGD1306512,VICKZ3	insulin-like growth factor 2 mRNA binding protein 3	O00425	10	Cytoplasm	translation regulator	Diagnosis	10643	140488	312320
JUP	ARVD12,CTNN γ,CTNNG,D930025P04Rik,DP3,DPIII,GAMMA-CATENIN,PDGB,PG,PKGB,PLAKOGLOBIN	junction plakoglobin	P14923	1	Plasma Membrane	other	Diagnosis	3728	16480	81679
KRT9	CK-9,EPPK,K9,KRT1-9	keratin 9	P35527	1	Cytoplasm	other	Diagnosis	3857	107656	266717
KRT6A	2310016L08Rik,BB144589,CK6A,CK6C,CK6D,Cytokeratin 6C,K6,K6A,K6alpha,K6B,K6beta,K6C,K6D,KERATIN 6A,Keratin6,KRT2-6A,KRT2-6B,Krt2-6c,Krt6,Krt6b,KRT6C,KRT6D,MGC141272,MK6a,Mk6b,mK6[a],mK6[b]	keratin 6A	P02538	1	Plasma Membrane	other	Diagnosis	3853	16687|16688
MSH6	AU044881,AW550279,GTBP,Gtmbp,HNPCC5,HSAP	mutS homolog 6 (E. coli)	P52701	8	Nucleus	enzyme	Diagnosis	2956	17688
NKX2-5	CHNG5,CSX,CSX1,FLJ52202,FLJ97166,FLJ97195,FLJ97197,FLJ99536,NKX2.5,NKX2E,NKX4-1,tinman	NK2 homeobox 5	--		Nucleus	transcription regulator	Diagnosis	1482	18091	114109
PARK7	CAP1,DJ-1,FLJ27376,FLJ34360,FLJ92274,RNA-BINDING PROTEIN REGULATORY SUBUNIT,SP22	parkinson protein 7	Q99497	20	Nucleus	enzyme	Diagnosis	11315	57320	117287
PDIA3	ER60,Erp,ERP57,ERP60,ERp61,Glucose Regulated Protein, 58kd,GRP57,GRP58,Hs.308709,HsT17083,Microsomal CPT,Microsomal protease er-60,MTP,P58,PDI,PDI-Q2,PHOSPHOLIPASE C ALPHA,PI-PLC,Pi-plc 1,Plca,PLC[a],Protein disulfide isomerase	protein disulfide isomerase family A, member 3	P30101	24	Cytoplasm	peptidase	Diagnosis	2923	14827	29468
PLG	Ab1-346,AI649309,DKFZp779M0222,GLU PLASMINOGEN,GLU-PG,LPA,Pg,PG2,PLASMINOGEN,Scdp	plasminogen	--	25	Extracellular Space	peptidase	Diagnosis	5340	18815	85253
PRDX1	ENHANCER,Enhancer protein,Hbp23,MGC108617,MSP23,NKEFA,OSF-3,PAG,PAGA,PAGB,PEROXIREDOXIN 1,PEROXYREDOXIN 1,PrdxI,PRX I,PRX1,TDPX2,TDX2,TPX2,TPxA	peroxiredoxin 1	Q06830	15	Cytoplasm	enzyme	Diagnosis	5052	18477	117254
PSMF1	AW048666,BC012260,MGC18784,PI31	proteasome (prosome, macropain) inhibitor subunit 1 (PI31)	Q92530	13	Cytoplasm	other	Diagnosis	9491	228769
RRM2	AA407299,MGC113712,MGC116120,R2,Ribonucleoside-diphosphate reductase M2 subunit,Ribonucleotide reductase non-heme subunit,RIBONUCLEOTIDE REDUCTASE SMALL SUBUNIT,Rnr-r2,RNRII,RR2,RR2M	ribonucleotide reductase M2	P31350	23	Nucleus	enzyme	Diagnosis	6241	20135	362720
SREBF1	ADD-1,bHLHd1,D630008H06,S14,SREBP-1,SREBP-1a,STEROL RESPONSE ELEMENT	sterol regulatory element binding transcription factor 1	P36956	12	Nucleus	transcription regulator	Diagnosis	6720	20787	78968
TFRC	2610028K12Rik,AI195355,AI426448,AU015758,CD71,E430033M20Rik,Mtvr-1,p90,T9,TFNR,TFR,TFR1,TR,TRANSFERRIN RECEPTOR,TRANSFERRIN RECEPTOR 1,TRFR	transferrin receptor (p90, CD71)	P02786	11	Plasma Membrane	transporter	Diagnosis	7037	22042	64678
TOP2B	D230016L12RIK,DNA topoisomerase II beta,TOP-2,TOP2BETA,TOPIIB,Topo2 beta,TOPOISOMERASE II BETA	topoisomerase (DNA) II beta 180kDa	Q02880	2	Nucleus	enzyme	Diagnosis	7155	21974	361100
TRA2A	1500010G04RIK,AL022798,G430041M01RIK,HSU53209,mAWMS1,RGD1562563,TRA2 ALPHA,TRANSFORMER-2 ALPHA	transformer 2 alpha homolog (Drosophila)	Q13595		Nucleus	other	Diagnosis	29896	101214	500116
UBC	2700054O04Rik,AI194771,HMG20,Polyubiquitin,Rps27a,TI-225,Uba52,Ubb,UBIQUITIN C	ubiquitin C	P0CG48	13	Cytoplasm	enzyme	Diagnosis	7316	22190	50522
XPC	RAD4,XP3,XPCC	xeroderma pigmentosum, complementation group C	Q01831	8	Nucleus	other	Diagnosis	7508	22591	312560
YWHAZ	1110013I11RIK,14-3-3 DELTA,14-3-3 S1,14-3-3 ZETA/DELTA,14-3-3-ZETA,14-3-3z,AI596267,AL022924,AU020854,KCIP-1,MGC111427,MGC126532,MGC138156,Protein kinase c inhibitor 1 beta/alpha,Protein kinase C inhibitor protein 1 zeta/delta,Tyr mono,TYROSINE 3-MONOOXYGENASE ZETA POLYPEPTIDE,YMHAZ,YWHAD	tyrosine 3-monooxygenase/tryptophan 5-monooxygenase activation protein, zeta polypeptide	P63104	3	Cytoplasm	enzyme	Diagnosis	7534	22631	25578

## Sheet: drugs
© 2000-2012 Ingenuity Systems, Inc. All rights reserved.
Symbol	Synonym(s)	Entrez Gene Name	GenPept/UniProt/Swiss-Prot Accession	Networks	Location	Type(s)	Drug(s)	Entrez Gene ID for Human	Entrez Gene ID for Mouse	Entrez Gene ID for Rat
FDPS	6030492I17Rik,Ac2-125,AI256750,FARNESYL DIPHOSPHATE SYNTHASE,FARNESYL PYROPHOSPHATE SYNTHASE,Fdpsl1,FPP SYNTHASE,FPP synthetase,FPPS,FPS,KIAA1293,MGC107162,mKIAA1293	farnesyl diphosphate synthase	P14324	24	Cytoplasm	enzyme	YM 529, alendronic acid, pamidronic acid	2224	110196	83791
HDAC4	4932408F19,4932408F19Rik,AHO3,AI047285,BDMR,HA6116,HD4,HDAC-A,KIAA0288	histone deacetylase 4	P56524	17	Nucleus	transcription regulator	tributyrin, belinostat, pyroxamide, vorinostat, romidepsin	9759	208727	363287
HDAC1	DKFZp686H12203,EG15181,ENSMUSG00000061062,Gm1824,GON-10,HD1,HDAC,Hdac1-ps,HISTONE DEACETYLASE-1,MGC102534,MGC118085,MommeD5,RPD3,RPD3L1	histone deacetylase 1	Q13547	12	Nucleus	transcription regulator	tributyrin, belinostat, pyroxamide, MGCD0103, vorinostat, romidepsin	3065	433759	297893
IMPDH2	ENSMUSG00000071041,Gm15210,Imp dehydrogenase 2,IMPD,IMPD2,Impdh,IMPDH-II,inosine 5'-phosphate dehydrogenase 2,MGC72938,OTTMUSG00000019498	IMP (inosine 5'-monophosphate) dehydrogenase 2	P12268		Cytoplasm	enzyme	thioguanine, VX-944, interferon alfa-2b/ribavirin, mycophenolic acid, ribavirin	3615	100042069|23918	301005
PLG	Ab1-346,AI649309,DKFZp779M0222,GLU PLASMINOGEN,GLU-PG,LPA,Pg,PG2,PLASMINOGEN,Scdp	plasminogen	--	25	Extracellular Space	peptidase	tenecteplase, PLAT, tranexamic acid, aprotinin, 6-aminocaproic acid, reteplase	5340	18815	85253
MAPK14	CRK1,CSBP,CSBP1,CSBP2,CSPB1,EXIP,Hog,MAPK p38,MGC102436,MGC105413,MGC142910,MXI2,P38,P38 KINASE,P38 Map Kinase,p38 MAPK,p38 Mapk alpha,p38 MAPK-α,P38-ALPHA,p38-RK,p38/Hog1,p38/Mpk2,P38/RK,p38a,p38Hog,PRKM14,PRKM15,RK,SAPK2A	mitogen-activated protein kinase 14	--	23	Cytoplasm	kinase	SCIO-469, RO-3201195	1432	26416	81649
NR3C1	GCCR,GCR,GCR ALPHA,GLUCOCORTICOID RECEPTOR,GLUCOCORTOCOID RECEPTOR,GR,Gr alpha,Gr beta,GR-A,GRL,Grl-1,HGR,Type ii corticosteroid receptor	nuclear receptor subfamily 3, group C, member 1 (glucocorticoid receptor)	P04150	9	Nucleus	ligand-dependent nuclear receptor	rimexolone, medrysone, clocortolone pivalate, diflorasone diacetate, fluorometholone, dexamethasone phosphate, cortisone acetate, halcinonide, flurandrenolide, desoximetasone, desonide, prednisolone, clobetasol propionate, fluocinolone acetonide, prednisone, hydrocortisone, triamcinolone, dexamethasone 21-acetate, 11beta hydrocortisone acetate, betamethasone, dexamethasone, budesonide, fluticason…	2908	14815	24413
SLC1A2	1700091C19Rik,2900019G14RIK,AI159670,EAAT2,Glt,GLT-1,Glutamate-aspartate transporter,MGLT1	solute carrier family 1 (glial high affinity glutamate transporter), member 2	P43004	15	Plasma Membrane	transporter	riluzole	6506	20511	29482
PPARG	CIMT1,GLM1,NR1C3,PPAR GAMMA 3,PPAR-GAMMA,PPARG1,PPARγ,PPFP	peroxisome proliferator-activated receptor gamma	P37231	15	Nucleus	ligand-dependent nuclear receptor	pioglitazone/metformin, rosiglitazone, GI262570, pioglitazone, tesaglitazar, troglitazone	5468	19016	25664
IGF1R	A330103N21RIK,CD221,D930020L01,hyft,IGF-IR,IGF1 RECEPTOR,Igf1r beta,Igf1r beta isoform,IGFIRC,IGFR,IGFR1,JTK13,LOC51049,MGC142170,MGC142172,MGC18216,NM1	insulin-like growth factor 1 receptor	P08069	19	Plasma Membrane	transmembrane receptor	OSI-906, cixutumumab, IGF1	3480	16001	25718
TOP2B	D230016L12RIK,DNA topoisomerase II beta,TOP-2,TOP2BETA,TOPIIB,Topo2 beta,TOPOISOMERASE II BETA	topoisomerase (DNA) II beta 180kDa	Q02880	2	Nucleus	enzyme	novobiocin, etoposide, CPI-0004Na, pixantrone, becatecarin, elsamitrucin, AQ4N, BN 80927, tafluposide, mitoxantrone, norfloxacin, dexrazoxane, tirapazamine, TAS-103, XK469, gatifloxacin, valrubicin, gemifloxacin, nemorubicin, nalidixic acid, epirubicin, doxorubicin, daunorubicin	7155	21974	361100
TOP2A	DNA TOPOISOMERASE II ALPHA,TOP2,TOPO II,TOPO2 ALPHA,TOPOISOMERASE II ALPHA,TP2A	topoisomerase (DNA) II alpha 170kDa	P11388	2	Nucleus	enzyme	novobiocin, etoposide, CPI-0004Na, pixantrone, becatecarin, elsamitrucin, AQ4N, BN 80927, tafluposide, mitoxantrone, norfloxacin, dexrazoxane, tirapazamine, TAS-103, gatifloxacin, valrubicin, gemifloxacin, nemorubicin, nalidixic acid, epirubicin, doxorubicin, daunorubicin	7153	21973	360243
PPIA	2700098C05,CPHN,CYCA,Cyclophilin,CYCLOPHILIN A,Cyclophillin,CyP-18,CYPA,CYPH,LOC100503444,MGC117158,MGC12404,MGC23397,MGC72881,PEPTIDYL-PROLYL CIS-TRANS ISOMERASE,T-Cell Cyclophilin	peptidylprolyl isomerase A (cyclophilin A)	P62937	9	Cytoplasm	enzyme	N-methyl-4-Ile-cyclosporin	5478	268373	25518
KCNA5	ATFB7,HCK1,HK2,HPCN1,Kv1,KV1.5,KV1.5 ALPHA SUBUNIT,MGC117058,MGC117059,MGC25248,PCN1	potassium voltage-gated channel, shaker-related subfamily, member 5	P22460		Plasma Membrane	ion channel	nicorandil, amiodarone, flecainide, quinidine	3741	16493	25470
PGR (includes EG:18667)	9930019P03Rik,BB114106,ENSMUSG00000074510,LOC360433,NR3C3,Pgrb,PR,PR BETA,PROGESTERONE RECEPTOR,Progesterone receptor A	progesterone receptor	P06401	16	Nucleus	ligand-dependent nuclear receptor	misoprostol, dienogest, ulipristal acetate, asoprisnil, ethynodiol diacetate, norethindrone acetate, ethinyl estradiol/ethynodiol diacetate, estradiol cypionate/medroxyprogesterone acetate, tosagestin, estradiol/norethindrone acetate, ZK 230211, nestorone, drospirenone/ethinyl estradiol/levomefolic acid, ethinyl estradiol/desogestrel, ethinyl estradiol/drospirenone, ethinyl estradiol/norelgestrom…	5241	18667	25154
CA2	AI131712,CA-II,CAR2,Carbonic anhydrase 2,Ltw-5,Lvtw-5	carbonic anhydrase II	P00918	4	Cytoplasm	enzyme	methazolamide, hydrochlorothiazide, acetazolamide, trichloromethiazide, dorzolamide, chlorothiazide, dorzolamide/timolol, brinzolamide, chlorthalidone, benzthiazide, sulfacetamide, topiramate	760	12349	54231
GART	Adenosine3,AIRS,FTRG,Gaps,GARFT,GARS,GARTF,MGC47764,PAIS,PGFT,PRGS	phosphoribosylglycinamide formyltransferase, phosphoribosylglycinamide synthetase, phosphoribosylaminoimidazole synthetase	P22102		Cytoplasm	enzyme	LY231514	2618	14450	288259
NR3C2 (includes EG:110784)	FLJ41052,MCR,MGC133092,MINERALOCORTICOID RECEPTOR,MLR,MR,NR3C2VIT,TYPE1 CORTICOSTEROID RECEPTOR	nuclear receptor subfamily 3, group C, member 2	P08235		Nucleus	ligand-dependent nuclear receptor	hydrochlorothiazide/spironolactone, fludrocortisone acetate, drospirenone, spironolactone, eplerenone	4306	110784	25672
RRM2	AA407299,MGC113712,MGC116120,R2,Ribonucleoside-diphosphate reductase M2 subunit,Ribonucleotide reductase non-heme subunit,RIBONUCLEOTIDE REDUCTASE SMALL SUBUNIT,Rnr-r2,RNRII,RR2,RR2M	ribonucleotide reductase M2	P31350	23	Nucleus	enzyme	gemcitabine, triapine, hydroxyurea, fludarabine phosphate	6241	20135	362720
PNP	AL024301,AU015798,FLJ94043,FLJ97288,FLJ97312,MGC117396,MGC125915,MGC125916,NP,Np-1,Np-2,NUCLEOSIDE PHOSPHORYLASE,Pnp1,Pnp2,PRO1837,PUNP,PURINE PHOSPHORYLASE	purine nucleoside phosphorylase	P00491	25	Nucleus	enzyme	forodesine, 9-deaza-9-(3-thienylmethyl)guanine	4860	667034|18950	290029
TYMS	HST422,MGC156654,MGC88736,THYMIDYLATE SYNTHASE,TMS,TS	thymidylate synthetase	P04818	17	Nucleus	enzyme	flucytosine, 5-fluorouracil, plevitrexed, nolatrexed, capecitabine, trifluridine, floxuridine, LY231514	7298	22171	29261
RARA	ALPHA RAR,NR1B1,PLZF-RARα,RAR,RAR ALPHA,RAR ALPHA 1,RARα,RETINOIC ACID RECEPTOR ALPHA	retinoic acid receptor, alpha	P10276	5	Nucleus	ligand-dependent nuclear receptor	etretinate, adapalene, arsenic trioxide, 13-cis-retinoic acid, tazarotene, acitretin, tretinoin, 9-cis-retinoic acid	5914	19401	24705
AR	AIS,Andr,ANDROGEN RECEPTOR,AW320017,DHTR,HUMARA,HYSP1,KD,NR3C4,SBMA,SMAX1,Testosterone receptor,TFM	androgen receptor	P10275	19	Nucleus	ligand-dependent nuclear receptor	estradiol valerate/testosterone enanthate, estradiol cypionate/testosterone cypionate, BMS-641988, nilutamide, bicalutamide, flutamide, nandrolone decanoate, testosterone cypionate, medroxyprogesterone acetate, oxandrolone, danazol, dihydrotestosterone, stanozolol, spironolactone, testosterone, oxymetholone, testosterone propionate, testosterone enanthate	367	11835	24208
TUBA1A	Alpha tubulin,Alpha tubulin isotype M alpha 1,Alpha1 tubulin,B-ALPHA-1,FLJ25113,LIS3,MGC102097,MGC102098,MGC102099,T-Alpha1 Tubulin,TRAF interacting,Tuba-1,Tuba2,TUBA3,Tubulin,TUBULIN ALPHA 3	tubulin, alpha 1a	Q71U36	10	Cytoplasm	other	epothilone B, ixabepilone, colchicine/probenecid, XRP9881, eribulin, AL 108, EC145, NPI-2358, milataxel, TPI 287, TTI-237, docetaxel, vinflunine, vinorelbine, vincristine, vinblastine, paclitaxel, podophyllotoxin, colchicine	7846	22142	64158
TUBB4	AI325297,Beta tubulin,BETA TUBULIN 4 ALPHA,Beta tubulin class iv,beta-5,Beta4 Tubulin,Class IVa Beta-Tubulin,M(beta)4,Tubb,TUBB5,TUBULIN BETA (5-BETA),TUBULIN BETA5	tubulin, beta 4	P04350	10	Cytoplasm	other	epothilone B, ixabepilone, colchicine/probenecid, XRP9881, ABT-751, eribulin, MST-997, AL 108, EC145, NPI-2358, milataxel, TPI 287, TTI-237, brentuximab vedotin, cabazitaxel, BMS-275183, docetaxel, vinflunine, vinorelbine, vincristine, vinblastine, paclitaxel, podophyllotoxin, colchicine	10382	22153	29213
TUBB2A	BETA TUBULIN,Beta-tubulin class ii,dJ40E16.7,M(beta)2,TUBB,TUBB2,TUBB2B,TUBULIN BETA 2A	tubulin, beta 2A	Q13885	10	Cytoplasm	other	epothilone B, ixabepilone, colchicine/probenecid, XRP9881, ABT-751, eribulin, MST-997, AL 108, EC145, NPI-2358, milataxel, TPI 287, TTI-237, brentuximab vedotin, cabazitaxel, BMS-275183, docetaxel, vinflunine, vinorelbine, vincristine, vinblastine, paclitaxel, podophyllotoxin, colchicine	7280	22151	498736
TUBB2C	4930542G03RIK,Beta2,Class IVb Beta-Tubulin,MGC101937,MGC28623,MGC6713,MGC73008,RP23-132N23.7,TUBB2,Tubb2c1,TUBB4B	tubulin, beta 2C	P68371	10	Cytoplasm	other	epothilone B, ixabepilone, colchicine/probenecid, XRP9881, ABT-751, eribulin, MST-997, AL 108, EC145, NPI-2358, milataxel, TPI 287, TTI-237, brentuximab vedotin, cabazitaxel, BMS-275183, docetaxel, vinflunine, vinorelbine, vincristine, vinblastine, paclitaxel, colchicine	10383	227613	296554
GSK3B	7330414F15Rik,8430431H08Rik,C86142,GSK-3,GSK-3BETA,GSK-3β,Gsk-beta,GSKβ,Tpk1	glycogen synthase kinase 3 beta	P49841	18	Nucleus	kinase	enzastaurin	2932	56637	84027
TOP1	Ab2-086,AI467334,D130064I21RIK,DNA topoisomerase type I,Scl70,TOPI,TOPO I,TOPO-1,TOPOISOMERASE I	topoisomerase (DNA) I	P11387	9	Nucleus	enzyme	elsamitrucin, T 0128, CT-2106, BN 80927, tafluposide, TAS-103, beta-lapachone, irinotecan, topotecan, 9-amino-20-camptothecin, rubitecan, gimatecan, karenitecin	7150	21969	64550
.	ATP1A1 isoform 1,Atpa-1,BC010319,Lactate dehydrogenase 1, a chain,MGC3285,MGC38419,MGC51750,Na K alpha 1,Na+/K+ atpase alpha1,NA,K-ATPASE ALPHA SUBUNIT 1,Na/K atpase alpha 1,Na/K atpase alpha 3,NKA ALPHA 1,Nkaa1b	ATPase, Na+/K+ transporting, alpha 1 polypeptide	P05023	6	Plasma Membrane	transporter	digoxin, omeprazole, ethacrynic acid, perphenazine	476	11928	24211
PLA2G7	LDL-PLA2,LP-PLA2,Lyso-Paf Acetyltransferase,MGC95107,PAF ACETYLHYDROLASE,PAF-AH,PAFAH MP,Plasma paf-ah,R75400	phospholipase A2, group VII (platelet-activating factor acetylhydrolase, plasma)	--	23	Extracellular Space	enzyme	darapladib	7941	27226	301265
COL4A5	ASLN,ATS,CA54,Collagen iv alpha5,COLLAGEN TYPE IV, ISOTYPE 4,COLLAGEN TYPE IV, ISOTYPE 5,MGC167109,MGC42377,Procollagen iv alpha5,RGD1565499	collagen, type IV, alpha 5	--	23	Extracellular Space	other	collagenase clostridium histolyticum	1287	12830	363457
PPARA	4933429D07Rik,AI118064,AW742785,hPPAR,MGC2237,MGC2452,NR1C1,PPAR,PPAR ALPHA,PPARα	peroxisome proliferator-activated receptor alpha	Q07869	6	Nucleus	ligand-dependent nuclear receptor	choline fenofibrate, NS-220, tesaglitazar, clofibrate, fenofibrate, docosahexaenoic acid, gemfibrozil	5465	19013	25747
TUBB6	2310057H16RIK,BB220206,HsT1601,MGC116110,MGC132410,MGC4083,RGD1305887,TUBB-5,Tubulin Beta 5	tubulin, beta 6	Q9BUF5	10	Cytoplasm	other	brentuximab vedotin, cabazitaxel	84617	67951	307351
TUBB2B	2410129E14RIK,bA506K6.1,Beta-tubulin T beta15,Beta1 Tubulin,Beta2 Tubulin,DKFZp566F223,FLJ98847,MGC124866,MGC8685,RGD1309427,RP11-506K6.1,Tubb2,Tubulin beta-4 chain	tubulin, beta 2B	Q9BVA1		Cytoplasm	other	brentuximab vedotin, cabazitaxel	347733	73710	291081
TUBB	AA408537,AI596182,B130022C14RIK,Beta tubulin,Beta tubulin 1,M(beta)5,M40,MGC117247,MGC16435,OK/SW-CL.56,TUBB1,TUBB5,TUBULIN BETA 5	tubulin, beta	P07437	10	Cytoplasm	other	brentuximab vedotin, cabazitaxel	203068	22154	29214
CDK2	A630093N05Rik,CDC2,CDC2-RELATED KINASE,Cyclin A associated kinase,CYCLIN E ASSOCIATED KINASE,CYCLIN E-DEPENDENT KINASE,p33(CDK2),p33CDK2	cyclin-dependent kinase 2	P24941	14	Nucleus	kinase	BMS-387032, flavopiridol	1017	12566	362817
RXRA	9530071D11RIK,FLJ00280,FLJ00318,FLJ16020,FLJ16733,MGC102720,NR2B1,RETINOID X RECEPTOR ALPHA,RXR,RXR ALPHA,RXRalpha1,RXRα	retinoid X receptor, alpha	P19793	9	Nucleus	ligand-dependent nuclear receptor	bexarotene, tretinoin, 9-cis-retinoic acid	6256	20181	25271
APP	AAA,Abetapp,Abpp,AD1,Adap,Ag,Amyloid betaA4 precursor protein,Amyloid precursor,amyloid-beta-protein,Amyloidogenic glycoprotein,APP isoform 1,APPI,appican,CTFgamma,CVAP,E030013M08RIK,Nexin II,P3,PN-II,PN2,PreA4,PROTEASE NEXIN2	amyloid beta (A4) precursor protein	P05067	11	Plasma Membrane	other	bapineuzumab	351	11820	54226
PML	1200009E24Rik,AI661194,MYL,PML-RARα,PP8675,Retinoic acid receptor,RGD1562602,RNF71,TRIM19	promyelocytic leukemia	P29590	22	Nucleus	transcription regulator	arsenic trioxide	5371	18854	315713
PDE4A	D9Ertd60e,DPDE2,Pde2/iva,PDE4,PDE46,PDE4A11,Pde4a1a,PDE4A4,Pde4a8,PHOSA	phosphodiesterase 4A, cAMP-specific	P27815	15	Cytoplasm	enzyme	arofylline, tetomilast, L 869298, anagrelide, cilomilast, milrinone, rolipram, L-826,141, amrinone, roflumilast, pentoxifylline, caffeine	5141	18577	25638
PARP1	5830444G22Rik,Adprp,Adprp1,ADPRT,ADPRT 1,AI893648,C80510,MGC93658,PADPRT,pADPRT-1,PARP,PARS,POLY(ADP-RIBOSE) POLYMERASE 1,PPOL,sPARP-1	poly (ADP-ribose) polymerase 1	P09874	11	Nucleus	enzyme	ABT-888, olaparib, INO-1001	142	11545	25591
AHCY	AA987153,AL024110,CuBP,MGC102079,MGC118063,MGC19228,S-Adenosylhomocysteine Hydrolase,SAH HYDROLASE,SAHH	adenosylhomocysteinase	P23526	24	Cytoplasm	enzyme	9-(2',3'-dihydroxycyclopent-4'-enyl)adenine, 3-deazaneplanocin, neplanocin A, 3-deazaaristeromycin, cyanovirin-N, 6'-C-methylneplanocin A	191	269378	29443
PPAT	5730454C12RIK,AA408689,AA675351,AI507113,ATASE,C79945,GPAT,MGC38417,MGC93251,PRAT	phosphoribosyl pyrophosphate amidotransferase	Q06203	6	Cytoplasm	enzyme	6-mercaptopurine, thioguanine, azathioprine	5471	231327	117544
THRB	C-erba-beta,ERBA-BETA,ERBA2,GRTH,MGC126109,MGC126110,MGC141269,MGC141270,NR1A2,PRTH,RATT3REC,T3RBETA,T3rec,T3R[b],THR1,THRB1,THYROID HORMONE RECEPTOR BETA,THYROID HORMONE RECEPTOR BETA2,TR BETA,TR BETA 1,Trb1,TRβ	thyroid hormone receptor, beta (erythroblastic leukemia viral (v-erb-a) oncogene homolog 2, avian)	--		Nucleus	ligand-dependent nuclear receptor	3,5-diiodothyropropionic acid, amiodarone, levothyroxine, L-triiodothyronine	7068	21834	24831
THRA	6430529J03Rik,AR7,AW259572,C-erbA alpha,c-ERBA-1,EAR7,ERB-T-1,ERBA,ERBA1,MGC000261,MGC43240,NR1A1,Rvr,T3R ALPHA,T3R[a],Thr alpha,THRA1,THRA2,TR ALPHA,Tr alpha1,Tra1	thyroid hormone receptor, alpha	--		Nucleus	ligand-dependent nuclear receptor	3,5-diiodothyropropionic acid, amiodarone, levothyroxine, L-triiodothyronine	7067	21833	81812
HSP90B1	ECGP,ENDOPLASMIN,ERP99,FLJ22209,GP96,GRP94,HSP GP96 PRECURSOR,HSP96,TA-3,TARG2,TRA1	heat shock protein 90kDa beta (Grp94), member 1	P14625	18	Cytoplasm	other	17-dimethylaminoethylamino-17-demethoxygeldanamycin, IPI-504, cisplatin	7184	22027	362862
HSP90AB1	AL022974,C81438,D6S182,FLJ26984,Hsp1beta,HSP84,Hsp84-1,HSP90,Hsp90 alpha,HSP90-BETA,HSP90B,HSPC2,HSPCB,LOC100505819,MGC115780,MGC94263	heat shock protein 90kDa alpha (cytosolic), class B member 1	P08238	7	Cytoplasm	enzyme	17-dimethylaminoethylamino-17-demethoxygeldanamycin, IPI-504, cisplatin	3326	15516	301252
HSP90AA1	AL024080,AL024147,FLJ31884,Heat shock protein 1, alpha,hsp4,HSP86,Hsp86-1,HSP89,Hsp89-alpha-delta-N,HSP89A,Hsp90,HSP90 ALPHA,HSP90A,HSP90N,HSPC1,HSPCA,HSPCAL1,HSPCAL4,HSPN,LAP2,MGC105293	heat shock protein 90kDa alpha (cytosolic), class A member 1	P07900	7	Cytoplasm	enzyme	17-dimethylaminoethylamino-17-demethoxygeldanamycin, IPI-504, cisplatin	3320	15519	299331
ESR1	AA420328,Alpha estrogen receptor,AU041214,DKFZp686N23123,ER,ER ALPHA,Er alpha (46 kDa isoform),ER-α,ER66,ERA,ER[a],ESR,ESRA,ESTR,ESTRA,ESTROGEN RECEPTOR ALPHA,ESTROGEN RECEPTOR1,NR3A1,RNESTROR,TERP-1	estrogen receptor 1	P03372	9	Nucleus	ligand-dependent nuclear receptor	17-alpha-ethinylestradiol, fulvestrant, beta-estradiol, estradiol 17beta-cypionate, estrone, estradiol valerate, 3-(4-methoxy)phenyl-4-((4-(2-(1-piperidinyl)ethoxy)phenyl)methyl)-2H-1-benzopyran-7-ol, bazedoxifene, estradiol valerate/testosterone enanthate, TAS-108, ethinyl estradiol/ethynodiol diacetate, estradiol acetate, esterified estrogens, estradiol cypionate/medroxyprogesterone acetate, co…	2099	13982	24890

## Sheet: Sheet0
© 2000-2012 Ingenuity Systems, Inc. All rights reserved.
Symbol	Synonym(s)	Entrez Gene Name	GenPept/UniProt/Swiss-Prot Accession	Networks	Location	Type(s)	Biomarker Application(s)	Drug(s)	Entrez Gene ID for Human	Entrez Gene ID for Mouse	Entrez Gene ID for Rat
2' 5' oas		--	--	22	unknown	group
19S proteasome		--	--	13	unknown	complex
20s proteasome	20s	--	--	13	unknown	complex
26s Proteasome	Proteasome,Proteasomes,PROTEOSOME	--	--	13	Cytoplasm	complex
60S ribosomal subunit		--	--	3	unknown	complex
AARS	AI316495,Alanine--tRNA ligase,ALANYL-TRNA SYNTHETASE,ALARS,C76919,CMT2N,MGC37368,sti	alanyl-tRNA synthetase	P49588	25	Cytoplasm	enzyme			16	234734	292023
ABCB7	AA517758,ABC7,ASAT,ATM1P,AU019072,EST140535	ATP-binding cassette, sub-family B (MDR/TAP), member 7	O75027		Cytoplasm	transporter			22	11306	302395
ABCD3	ABC43,AI313901,AU018866,AW146054,Peroxisomal Membrane,PMP68,PMP70,PXMP1,ZWS2	ATP-binding cassette, sub-family D (ALD), member 3	P28288	11	Cytoplasm	transporter			5825	19299	25270
ACADM	ACAD1,Acetyl coenzyme a dehydrogenase, medium chain,Acetyl-Coenzyme A Dehydrogenase,Acyl-CoA dehydrogenase, medium chain,AU018656,FLJ18227,FLJ93013,FLJ99884,MCAD,MCADH,MEDIUM-CHAIN FATTY ACYL-COA DEHYDROGENASE	acyl-CoA dehydrogenase, C-4 to C-12 straight chain	P11310	15	Cytoplasm	enzyme	Unspecified Application		34	11364	24158
ACADVL	ACAD6,LCACD,MGC93660,VERY LONG-CHAIN FATTY ACYL-COA DEHYDROGENASE,VLACD,VLCAD	acyl-CoA dehydrogenase, very long chain	P49748	15	Cytoplasm	enzyme	Unspecified Application		37	11370	25363
ACAT2	Ab2-076,ACAT3,Acetoacetyl Coa Thiolase,ACETOCOENZYME A ACETYLTRANSFERASE 2,ACTL,AW742799,MGC95138,Similar to tcp1x,T2,Tcp-1x,Tcp-x1,Tcp1-rs1	acetyl-CoA acetyltransferase 2	Q9BWD1	6	Cytoplasm	enzyme			39	110460|224530	308100
ACIN1	2610036I19Rik,2610510L13Rik,ACINUS,Acinus S,ACINUS-1,acinusL,ACN,Apoptotic Chromatin Condensation Inducer In The Nucleus,C79325,DKFZp667N107,fSAP152,KIAA0670,mKIAA0670	apoptotic chromatin condensation inducer 1	Q9UKV3	5	Nucleus	enzyme			22985	56215	305884
ACLY	A730098H14RIK,ACL,ATP CITRATE LYASE,ATPCL,AW538652,Cce,CITRATE LYASE,CLATP,MGC124629	ATP citrate lyase	P53396	15	Cytoplasm	enzyme	Unspecified Application		47	104112	24159
Acox	Aco,acyl coenzyme A oxidase,Acyl-CoA,Acyl-CoA Oxidase,acyl-CoA:oxygen 2-oxidoreductase,Fatty Acyl-Coa Oxidase,fatty acyl-coenzyme A oxidase,Peroxisomal Acyl-CoA Oxidase,Peroxisomal lauroyl-coa oxidase	--	--	12	Cytoplasm	group
ACSL3	2610510B12Rik,ACS3,ACYL-COA SYNTHETASE 3,C85929,FACL3,LACS3,PRO2194	acyl-CoA synthetase long-chain family member 3	O95573	6	Cytoplasm	enzyme			2181	74205	114024
ACSL	acid:CoA ligase (AMP-forming),ACS,acyl-activating enzyme,Acyl-CoA Synthase (Long-Chain),acyl-CoA synthetase,arachidonyl-CoA synthetase,Facl,FACS,fatty acid thiokinase (long chain),Fatty Acyl-CoA Synthetase,Lacs,Lignoceroyl CoA Ligase,lignoceroyl-CoA synthase,Long chain acyl CoA synthetase,long-chain-fatty-acid-CoA ligase,Palmitoyl CoA Ligase,palmitoyl-CoA synthase	--	--	6	Cytoplasm	group
ACTB	A-X actin,Actin beta,Actx,BETA ACTIN,BETA CA,E430023M04Rik,Melanoma x actin,MGC128179,PS1TP5BP1	actin, beta	P60709	7	Cytoplasm	other			60	11461	81822
ACTC1	ACTC,ASD5,CARDIAC ALPHA ACTIN,CMD1R,CMH11,LVNC4,MGC156490	actin, alpha, cardiac muscle 1	P68032	7	Cytoplasm	enzyme			70	11464	29275
ACTG1	ACT,ACTG,Actin gamma,ACTL,AL023024,beta-actin,Chi-actin,DFNA20,DFNA26,E51,G-actin,GAMMA ACTIN,MGC117491,MGC28612	actin, gamma 1	P63261	7	Cytoplasm	other	Unspecified Application		71	11465	287876
ACTL6A	2810432C06RIK,Actin-like 6a,ACTL6,AI851094,ARP4,ARPN-BETA,BAF53,BAF53A,C79802,INO80K,MGC112664,MGC5382,RGD1307747	actin-like 6A	--	25	Nucleus	other			86	56456	361925
ACTN4	Actinin alpha4,ACTININ-4,Alpha actinin 4,C77391,DKFZp686K23158,FSGS,FSGS1,MGC102374,NON-MUSCLE ALPHA-ACTININ	actinin, alpha 4	O43707	7	Cytoplasm	other			81	60595	63836
acyl-CoA dehydrogenase	acyl coenzyme A dehydrogenase,acyl dehydrogenase,acyl-CoA:(acceptor) 2,3-oxidoreductase,fatty acyl coenzyme A dehydrogenase,fatty-acyl-CoA dehydrogenase,general acyl CoA dehydrogenase,long-chain acyl coenzyme A dehydrogenase,long-chain acyl-CoA dehydrogenase,medium-chain acyl-CoA dehydrogenase,medium-chain acyl-coenzyme A dehydrogenase	--	--	15	unknown	group
Adaptor protein 1	AP-1,Ap1a	--	--	21	Cytoplasm	complex
Adaptor protein 2	AP-2,Clathrin adaptor AP2	--	--	6	Cytoplasm	complex
ADAR	ADAR1,ADAR1-L,AV242451,DRADA,DSH,DSRAD,dsRNA-specific AdD,G1P1,IFI-4,K88DSRBP,mZaADAR,P136	adenosine deaminase, RNA-specific	P55265	22	Nucleus	enzyme			103	56417	81635
ADCY	3',5'-cyclic AMP synthetase,AC,ADENYL CYCLASE,Adenylate Cyclase,Adenylyl Cyclase,ATP diphosphate-lyase (cyclizing),mAC,sAC	--	--	19	Cytoplasm	group
ADH5 (includes EG:11532)	ADH-3,ADHX,CLASS III ADH,FDH,Glutathione Dependent Formaldehyde Dehydrogenase,Gs fdh,GSNOR	alcohol dehydrogenase 5 (class III), chi polypeptide	P11766	11	Cytoplasm	enzyme			128	11532
ADPGK	2610017G09RIK,C77577,DKFZP434B195,RGD1306103	ADP-dependent glucokinase	Q9BRR6	23	unknown	kinase			83440	72141	315722
ADRB	ADR-β,Beta Adrenergic Receptor,Beta Adrenoreceptor,Beta-adrenoceptor,Beta-AR	--	--	24	Plasma Membrane	group
AHCY	AA987153,AL024110,CuBP,MGC102079,MGC118063,MGC19228,S-Adenosylhomocysteine Hydrolase,SAH HYDROLASE,SAHH	adenosylhomocysteinase	P23526	24	Cytoplasm	enzyme	Unspecified Application	9-(2',3'-dihydroxycyclopent-4'-enyl)adenine, 3-deazaneplanocin, neplanocin A, 3-deazaaristeromycin, cyanovirin-N, 6'-C-methylneplanocin A	191	269378	29443
AHNAK	1110004P15RIK,2310047C17RIK,AA589382,AHNAK 1,AHNAKRS,AV091586,DA,desmoyokin,DY6,Hypothetical PDZ Domain,LOC686579,MGC5395,RGD1308572	AHNAK nucleoprotein	Q09666	19	Nucleus	other			79026	66395	191572
AHR	Ah,AH RECEPTOR,Ahh,Ahre,bHLHe76,DIOXIN RECEPTOR,DR,In	aryl hydrocarbon receptor	--		Nucleus	ligand-dependent nuclear receptor			196	11622	25690
Ahr-aryl hydrocarbon-Arnt		--	--	20	Nucleus	complex
AHSA1	AHA1,BC023857,C14orf3,MGC36589,MGC36618,p38	AHA1, activator of heat shock 90kDa protein ATPase homolog 1 (yeast)	O95433		Cytoplasm	other			10598	217737
AKR1C1/AKR1C2	2-ALPHA-HSD,20-ALPHA-HSD,3-ALPHA HSD3,9430025F20Rik,AI315367,AKR1C-pseudo,AKR1C1,AKR1C2,AKR1C21,Aldo-keto reductase,BABP,C9,DD,DD1,DD1/DD2,DD2,DDH,DDH1,DDH2,DIHYDRODIOL DEHYDROGENASE,FLJ53800,H-37,HAKRC,HAKRD,HBAB,Hepatic Bile Acid Binding,LOC100134257,LOC100508006,MBAB,MCDR2,MGC102401,MGC8954	aldo-keto reductase family 1, member C2 (dihydrodiol dehydrogenase 2; bile acid binding protein; 3-alpha hydroxysteroid dehydrogenase, type III)	Q04828	20	Cytoplasm	enzyme			1645|1646	77337	291283
Akt	AKT/PKB,B/Akt,Pkb,Protein Kinase B,Protein kinase B/akt,RAC-PK,Rac/Pkb	--	--	5	Cytoplasm	group	Diagnosis,Disease Progression,Efficacy,Prognosis,Response to Therapy,Safety
ALB	ALB1,ALBUMIN,Albumin 1,Albumin isomer 1,Albumin isomer 2,Albumin isomer 3,Albza,DKFZp779N1935,human albumin,PRO0883,PRO0903,PRO1341,SA,SERUM ALBUMIN,SERUM ALBUMIN CHAIN A,Serum albumin precursor	albumin	P02768	12	Extracellular Space	transporter	Diagnosis,Efficacy,Prognosis,Safety,Unspecified Application		213	11657	24186
alcohol dehydrogenase	ADH,alcohol dehydrogenase (NAD),alcohol:NAD oxidoreductase,aldehyde reductase,aliphatic alcohol dehydrogenase,ethanol dehydrogenase,NAD-dependent alcohol dehydrogenase,NAD-specific aromatic alcohol dehydrogenase,NADH-alcohol dehydrogenase,NADH-aldehyde dehydrogenase,primary alcohol dehydrogenase,yeast alcohol dehydrogenase	--	--	11	unknown	group	Safety,Unspecified Application
ALDH	ALDEHYDE DEHYDROGENASE	--	--	21	Nucleus	group	Efficacy
ALDH1A2	ALDH1A1,Aldh1a7,AV116159,MGC114283,MGC26444,RALDH(II),RALDH-2,Raldh1,RALDH2-T,RETINALDEHYDE DEHYDROGENASE 2	aldehyde dehydrogenase 1 family, member A2	O94788	21	Cytoplasm	enzyme			8854	19378	116676
ALDH3A2	Ahd-3,Ahd-3r,AI194803,ALD10,ALDH10,Aldh4,Aldh4-r,DKFZp686E23276,FALDH,Fatty Aldehyde Dehydrogenase,FLJ20851,SLS	aldehyde dehydrogenase 3 family, member A2	P51648	21	Cytoplasm	enzyme			224	11671	65183
aldo	ALDOLASE,FRUCTOSE-BISPHOSPHATE ALDOLASE	--	--	16	unknown	group	Unspecified Application
ALDOA	ALDA,ALDO1,ALDOLASE,Aldolase 1,Aldolase 1a,ALDOLASE A,Alfa,GSD12,MGC107164,MGC10942,MGC17716,MGC17767,RNALDOG5	aldolase A, fructose-bisphosphate	P04075	16	Cytoplasm	enzyme			226	11674	24189
ALDOC	AI847350,ALDC,ALDCAA,ALDO3,Aldolase 3,ALDOLASE C,AU040929,F16dip7,Fructose bisphosphate aldolase c,RATALDCAA,SCRG2,Zebrin2	aldolase C, fructose-bisphosphate	P09972	16	Cytoplasm	enzyme			230	11676	24191
Alp	alkaline phenyl phosphatase,Alkaline Phosphatase,alkaline phosphohydrolase,alkaline phosphomonoesterase,Ap,glycerophosphatase,orthophosphoric-monoester phosphohydrolase (alkaline optimum),phosphomonoesterase	--	--	9	unknown	group	Diagnosis,Efficacy,Prognosis,Safety,Unspecified Application
Alpha actin	Actin-alpha,Actin-α,α-Actin	--	--	7	Cytoplasm	group
Alpha Actinin	ACTININ,Actinin Alpha,Actinin α,ACTN,α-Actinin	--	--	15	Cytoplasm	group
Alpha tubulin	TUBULIN ALPHA,Tubulin alpha chain	--	--	10	Cytoplasm	group
AMOT	ANGIOMOTIN,C81439,CAG-2,D0Kist1,E230009N18Rik,KIAA1071,mKIAA1071,RGD1564027,SII6	angiomotin	Q4VCS5	25	Plasma Membrane	other			154796	27494	300289
AMPK	AMP KINASE,AMP-activated kinase,Amp-pk	--	--	6	Cytoplasm	complex
ANAPC4	2610306D21Rik,APC4,D5ERTD249E	anaphase promoting complex subunit 4	Q9UJX5	18	Nucleus	enzyme			29945	52206	305420
ANAPC1/LOC100286979	2610021O03Rik,AI047775,AI853536,ANAPC1,APC1,AW547281,LOC100134261,LOC100286979,LOC285069,MCPR,TSG24	anaphase promoting complex subunit 1	Q9H1A4		Nucleus	other			100286979|64682	17222	311412
Androgen-ARA55-AR-ARA70-HSP40-HSP70-HSP90		--	--	7	Cytoplasm	complex
ANP32B	2410015B15Rik,APRIL,BM554099,MGC103080,PAL31,PHAPI2,PHAPI2A,SSP29	acidic (leucine-rich) nuclear phosphoprotein 32 family, member B	Q92688		Nucleus	other			10541	67628	170724
Ant	Adenine Nucleotide Translocator	--	--	11	Cytoplasm	group
ANXA1	ANNEXIN 1,ANNEXIN A1,ANX1,C430014K04RIK,Lc1,Lipocortin,LIPOCORTIN1,LPC1,P35	annexin A1	P04083		Plasma Membrane	other	Diagnosis,Prognosis,Unspecified Application		301	16952	25380
ANXA2	ANNEXIN A2,ANNEXIN II,ANNEXIN2,ANX2,ANX2L4,AW215814,CAL1H,Calpactin-1 heavy chain,LIP2,LIPOCORTIN2,LPC2,LPC2D,P36,PAP-IV	annexin A2	P07355	6	Plasma Membrane	other	Diagnosis,Unspecified Application		302	12306	56611
ANXA5	ANAV,Annexin A5,ANNEXIN-V,ANX5,ENX2,LC5,MGC126971,MGC93655,PP4,R74653	annexin A5	P08758	22	Plasma Membrane	other	Diagnosis		308	11747	25673
Ap1	c-Jun	--	--	18	Nucleus	complex
Ap2 alpha	Adaptin alpha,Alpha adaptin	--	--	10	Plasma Membrane	group
AP2B1	1300012O03Rik,ADTB2,AI788979,AP-2 Beta-2,AP105B,AP2-BETA,BETA2 ADAPTIN,CLAPB1,DKFZp781K0743	adaptor-related protein complex 2, beta 1 subunit	P63010	6	Cytoplasm	transporter			163	71770	140670
AP3D1	AA407035,ADTD,AP3 DELTA,AP3D,AP3D1 isoform 1,Blvr,Bolvr,DELTA ADAPTIN,hBLVR,mBLVR1,MGC140989,mh,mocha	adaptor-related protein complex 3, delta 1 subunit	O14617	25	Cytoplasm	transporter			8943	11776	314633
APC	anaphase promoting complex,APC-C	--	--	18	Cytoplasm	complex
APEX1	APE,APE-1,APEN,APEX,APEX NUCLEASE,APX,HAP1,REF-1	APEX nuclease (multifunctional DNA repair enzyme) 1	P27695	16	Nucleus	enzyme			328	11792	79116
APP	AAA,Abetapp,Abpp,AD1,Adap,Ag,Amyloid betaA4 precursor protein,Amyloid precursor,amyloid-beta-protein,Amyloidogenic glycoprotein,APP isoform 1,APPI,appican,CTFgamma,CVAP,E030013M08RIK,Nexin II,P3,PN-II,PN2,PreA4,PROTEASE NEXIN2	amyloid beta (A4) precursor protein	P05067	11	Plasma Membrane	other	Diagnosis,Efficacy,Unspecified Application	bapineuzumab	351	11820	54226
AR	AIS,Andr,ANDROGEN RECEPTOR,AW320017,DHTR,HUMARA,HYSP1,KD,NR3C4,SBMA,SMAX1,Testosterone receptor,TFM	androgen receptor	P10275	19	Nucleus	ligand-dependent nuclear receptor	Diagnosis,Disease Progression,Efficacy,Prognosis	estradiol valerate/testosterone enanthate, estradiol cypionate/testosterone cypionate, BMS-641988, nilutamide, bicalutamide, flutamide, nandrolone decanoate, testosterone cypionate, medroxyprogesterone acetate, oxandrolone, danazol, dihydrotestosterone, stanozolol, spironolactone, testosterone, oxymetholone, testosterone propionate, testosterone enanthate	367	11835	24208
AR-HSP40-HSP70-HSP90		--	--	7	Cytoplasm	complex
ARCN1	4632432M07Rik,ARCHAIN 1,COP1D,COPD,MGC102316,MGC27546,MGC94158,nur17	archain 1	P48444	8	Cytoplasm	other			372	213827	300674
ARG1	AI,AI256583,ARGINASE I,Hyperargininemia,PGIF	arginase, liver	P05089		Cytoplasm	enzyme			383	11846	29221
ARID2	1700124K17RIK,4432409D24RIK,BAF200,DKFZ p686G052,DKFZp779P0222,FLJ30619,KIAA1557,p200,zipzap/p200	AT rich interactive domain 2 (ARID, RFX-like)	Q68CP9		Nucleus	transcription regulator			196528	77044	366980
ARID1B	6A3-5,8030481M12,9330189K18RIK,AI836955,Ardi1b,B230217J03RIK,BAF210,BAF250B,BRIGHT,DAN15,Eld/Osa,ELD/OSA1,KIAA1235,mKIAA1235,OSA2,P250R,RP11-419L10.1,SMCF1	AT rich interactive domain 1B (SWI1-like)	Q8NFD5	22	Nucleus	transcription regulator			57492	239985	282546
ARID3A	BRIGHT,DRI1,DRIL1,DRIL3,DRX,E2FBP1	AT rich interactive domain 3A (BRIGHT-like)	Q99856	4	Nucleus	transcription regulator			1820	13496
ARID4A	A630009N03,A630067N03Rik,MmRBBP1,RB-BINDING PROTEIN 1,RBBP-1,RBP-1	AT rich interactive domain 4A (RBP1-like)	P29374	17	Nucleus	transcription regulator			5926	238247	314205
ARID4B	5930400I17,6330417L24Rik,6720480E17Rik,9330186M13,BCAA,BRCAA1,DKFZp313M2420,MGC163290,RBBP1L1,RBP1-LIKE,RBP1L1,SAP180	AT rich interactive domain 4B (RBP1-like)	Q4LE39	4	Nucleus	other			51742	94246	84481
ARID5B	4930580B11,5430435G07Rik,AI467247,DESRT,DKFZP586N012,FLJ21150,FLJ41888,MRF-2,Mrf1-like	AT rich interactive domain 5B (MRF1-like)	Q14865		Nucleus	transcription regulator			84159	71371	309728
ARL6IP5	5930404D22Rik,addicsin,addiscin,Adp ribosylation like factor 6 interacting protein 5,Aip-5,AV001879,DERP11,GTRAP3-18,hp22,HSPC127,jmx,JWA,PRA2,PRAF3	ADP-ribosylation-like factor 6 interacting protein 5	O75915	11	Cytoplasm	other			10550	65106	66028
ARNT	Arnt1,bHLHe2,D3Ertd557e,DIOXIN RECEPTOR,Drnt,ESTM42,HIF BETA,HIF-1BETA,HIF1B,HIF1β,KIAA4051,mKIAA4051,TANGO,W08714	aryl hydrocarbon receptor nuclear translocator	--		Nucleus	transcription regulator			405	11863	25242
Arnt-Hif1a		--	--	16	Nucleus	complex
ARNTL	Arnt3,bHLHe5,BMAL1,BMAL1b,bmal1b',BMAL1c,JAP3,MGC47515,MOP3,PASD3,TIC	aryl hydrocarbon receptor nuclear translocator-like	O00327	16	Nucleus	transcription regulator			406	11865	29657
ASNS	AS,ASPARAGINE SYNTHETASE,MGC93148,TS11	asparagine synthetase (glutamine-hydrolyzing)	P08243	9	Cytoplasm	enzyme			440	27053	25612
ATF4	C/ATF,CREB-2,MGC96460,TAXREB67,TXREB	activating transcription factor 4 (tax-responsive enhancer element B67)	--		Nucleus	transcription regulator			468	11911	79255
ATF6	9130025P16RIK,9630036G24,AA789574,Atf6 (predicted),ATF6 ALPHA,ATF6A,DKFZp686P2194,ESTM49,FLJ21663	activating transcription factor 6	--		Cytoplasm	transcription regulator			22926	226641	304962
ATF7	1110012F10RIK,9430065F09RIK,AI549878,ATFA,ATFA2,C130020M04RIK,MGC31554,MGC57182	activating transcription factor 7	P17544	1	Nucleus	transcription regulator			11016	223922	315333
ATF1 (includes EG:100040260)	EWS-ATF1,FUS/ATF-1,Gm1862,LOC100047705,TREB36	activating transcription factor 1	--		Nucleus	transcription regulator			466	11908|100040260	315305
ATIC	2610509C24Rik,AA536954,AICAR,AICAR TFASE,AICARFT,AW212393,FLJ93545,IMP CHASE,PURH	5-aminoimidazole-4-carboxamide ribonucleotide formyltransferase/IMP cyclohydrolase	P31939		Cytoplasm	enzyme			471	108147	81643
ATN1	Atr1,ATROPHIN,atrophin-1,B37,D12S755E,DRPLA,HRS,NOD	atrophin 1	--		Nucleus	transcription regulator			1822	13498	29515
ATP1A1	ATP1A1 isoform 1,Atpa-1,BC010319,Lactate dehydrogenase 1, a chain,MGC3285,MGC38419,MGC51750,Na K alpha 1,Na+/K+ atpase alpha1,NA,K-ATPASE ALPHA SUBUNIT 1,Na/K atpase alpha 1,Na/K atpase alpha 3,NKA ALPHA 1,Nkaa1b	ATPase, Na+/K+ transporting, alpha 1 polypeptide	P05023	6	Plasma Membrane	transporter		digoxin, omeprazole, ethacrynic acid, perphenazine	476	11928	24211
ATP1B3	AA409958,AI664000,ATPB-3,AW212096,CD298,FLJ29027,NA,K-ATPASE BETA SUBUNIT 3,NKAB3S	ATPase, Na+/K+ transporting, beta 3 polypeptide	P54709		Plasma Membrane	transporter			483	11933	25390
ATP2A2	9530097L16RIK,ATP2B,Ca-transporting atpase sarcoplasmic reticulum type,D5Wsu150e,DAR,DD,DKFZp686P0211,FLJ20293,FLJ38063,KIAA4195,MGC45367,mKIAA4195,Sarcoplasmic reticulum ca2+ atpase,SERCA2,Serca2a/b,SercaII	ATPase, Ca++ transporting, cardiac muscle, slow twitch 2	P16615	18	Cytoplasm	transporter			488	11938	29693
ATP2B4	ATP2B2,DKFZp686G08106,DKFZp686M088,MGC129362,MGC129363,MXRA1,PMCA4,PMCA4b,PMCA4x	ATPase, Ca++ transporting, plasma membrane 4	P23634	18	Plasma Membrane	transporter			493	381290	29600
ATP5A1	AI035633,AL022851,AL023067,ALPHA SUBUNIT OF THE F1F0 ATP SYNTHASE (COMPLEX V),Atp synthase (f0f1), subunit alpha,ATP synthase alpha,Atp synthase alpha chain,ATP SYNTHASE ALPHA SUBUNIT,ATP Synthase F1 alpha,ATP synthase mitochondrial f1complex,ATP5A,ATP5AL2,ATPM,D18Ertd206e,F1 atpase,hATP1,MGC139059,MOM2,OMR,ORM,Q3u452	ATP synthase, H+ transporting, mitochondrial F1 complex, alpha subunit 1, cardiac muscle	P25705	15	Cytoplasm	transporter			498	11946	65262
ATP5B	ATP Synthase Beta,ATP Synthase F1 Beta,Atpd,ATPMB,ATPSB,Beta atp synthase,BETA SUBUNIT ATP SYNTHASE,F1 Atp Synthase beta,F1 ATPASE BETA,F1 BETA ATPASE,H+ ATP Synthase Beta,MGC5231,OXPHOS COMPLEX V, SUBUNIT B	ATP synthase, H+ transporting, mitochondrial F1 complex, beta polypeptide	P06576	15	Cytoplasm	transporter			506	11947	171374
ATP5C1	1700094F02Rik,ATP5C,ATP5CL1,F1 gamma,GAMMA SUBUNIT F1F0 ATPASE	ATP synthase, H+ transporting, mitochondrial F1 complex, gamma polypeptide 1	P36542	15	Cytoplasm	transporter			509	11949	116550
ATP6V0D1	Ac39,AI267038,ATP6D,ATP6DV,FLJ43534,LOC100132855,P39,Physophilin,VATX,VMA6,VPATPD	ATPase, H+ transporting, lysosomal 38kDa, V0 subunit d1	P61421	15	Cytoplasm	transporter			9114	11972	291969
ATPase	(Ca2+ + Mg2+)-ATPase,adenosine 5'-triphosphatase,adenosine triphosphatase,adenylpyrophosphatase,ATP hydrolase,ATP monophosphatase,ATP phosphohydrolase,complex V (mitochondrial electron transport),HCO3--ATPase,SV40 T-antigen,triphosphatase	--	--	7	unknown	group
ATXN1	ATAXIN-1,ATX1,C85907,D6S504E,ENSMUSG00000074917,Gm10786,SCA1	ataxin 1	P54253	13	Nucleus	transcription regulator			6310	20238	25049
ATXN2	9630045M23RIK,ATAXIN-2,ATX2,AW544490,FLJ46772,SCA2,TNRC13	ataxin 2	Q99700	11	Nucleus	other			6311	20239	288663
ATXN7	A430107N12RIK,ADCAII,AI627028,ATAXIN-7,FLJ17787,OPCA3,RGD1562692,SCA7	ataxin 7	O15265	13	Nucleus	other			6314	246103	361015
AXIN1	AI316800,AXIN,AXIN FORM I,Fu,fused,Kb,Ki,kinky,knobbly,MGC132911,MGC52315	axin 1	O15169	7	Cytoplasm	other			8312	12005	79257
BACH2	E030004N02RIK,LOC653299,MGC117590,RGD1562865	BTB and CNC homology 1, basic leucine zipper transcription factor 2	Q9BYV9	12	Nucleus	transcription regulator			60468	12014	313125
BAX	Bcl2-associated X,BCL2L4	BCL2-associated X protein	Q07812	11	Cytoplasm	transporter	Disease Progression,Efficacy,Prognosis,Unspecified Application		581	12028	24887
BAZ1B	C87820,WBSCR10,WBSCR9,WSTF	bromodomain adjacent to zinc finger domain, 1B	Q9UIG0	7	Nucleus	transcription regulator			9031	22385	368002
BCAP31	6C6-AG,b-cell receptor-associated protein 31,BAP31,CDM,DXS1357E,MGC94221,p28 Bap31	B-cell receptor-associated protein 31	P51572	10	Cytoplasm	transporter			10134	27061	293852
BCLAF1	2610102K23RIK,2700025J07Rik,2810454G14Rik,5730534O06Rik,Aa2-041,AI450190,AW556225,bK211L9.1,BTF,KIAA0164,MGC30519,MGC58035,mKIAA0164	BCL2-associated transcription factor 1	Q9NYF8	18	Nucleus	transcription regulator			9774	72567	293017
BCR	B Cell Receptor,Bcr (B-cell receptor complex)	--	--	18	Plasma Membrane	complex
Beta Tubulin	Tubulin beta	--	--	10	unknown	group
beta-estradiol	(8R,9S,13S,14S,17S)-13-methyl-6,7,8,9,11,12,14,15,16,17-decahydrocyclopenta[a]phenanthrene-3,17-diol,1,3,5(10)-estratriene-3,17beta-diol,17-beta-E2,17-beta-estradiol,17-beta-oestradiol,50-28-2,Aerodiol,Agofollin,Alora,Altrad,Amnestrogen,Aquadiol,Bardiol,C18H24O2,Climaderm,Climara,Compudose,Compudose 200,Compudose 365,Corpagen,Dermestril,Dihydromenformon,Dihydrotheelin,Dimenformon,Dimenformon Prol…	--	--	25	unknown	chemical - endogenous mammalian	Diagnosis,Efficacy,Response to Therapy,Safety
Betacatenin/TCF	Beta-catenin-LEF/TCF	--	--	14	Nucleus	complex
BLM	BS,MGC126616,MGC131618,MGC131620,RECQ2,RECQL2,RECQL3	Bloom syndrome, RecQ helicase-like	P54132	7	Nucleus	enzyme			641	12144	308755
BLVRA	0610006A11Rik,2500001N03Rik,BLVR,BVR,BVRA	biliverdin reductase A	P53004		Cytoplasm	enzyme			644	109778	116599
BMP2K	4933417M22Rik,AA673486,AV128808,BIKE,DKFZp434K0614,DKFZp434P0116,HRIHFB2017	BMP2 inducible kinase	Q9NSY1	9	Nucleus	kinase			55589	140780
BOP1/LOC727967	AU020183,AW146150,BOP1,D18861,Erb1p,KIAA0124,LOC727967,MGC109114,mKIAA0124	block of proliferation 1	Q14137	5	Nucleus	other			23246|727967	12181	300050
BRCA1	BRCA1 (LACKING EXON 11),BRCAI,BRCC1,BROVCA1,IRIS,PNCA4,PSCP,RNF53	breast cancer 1, early onset	P38398	14	Nucleus	transcription regulator	Diagnosis,Efficacy,Prognosis,Response to Therapy		672	12189	497672
BRD4	Brd5,CAP,HUNK1,HUNKI,LOC100043433,MCAP,WI-11513	bromodomain containing 4	O60885	3	Nucleus	kinase			23476	57261	362844
BRD7	BP75,CELTIX1,NAG4,Ptpn13ip	bromodomain containing 7	Q9NPI1	4	Nucleus	transcription regulator			29117	26992	361374
BRD8	2610007E11Rik,4432404P07RIK,4933408B17,4933408B17Rik,p120,SMAP,SMAP2,THYROID HORMONE RECEPTOR COACTIVATING	bromodomain containing 8	Q9H0E9	22	Nucleus	transcription regulator			10902	78656	291691
BRI3BP	2410150I18Rik,AI841257,AW742481,BNAS1,HCCR-2,HCCRBP-1,KG19	BRI3 binding protein	Q8WY22	25	unknown	other			140707	76809	498176
BTF3L4	4632412E09RIK,5730434I03Rik,AI316863,AU022207,AW552446,LOC683767,MGC23908,MGC88389,RGD1311774,RGD1561589	basic transcription factor 3-like 4	--	19	unknown	other			91408	70533	305284|366434
BUB1B	AU045529,Bub1A,BUB1beta,BUBR1,hBUBR1,MAD3,MAD3L,MGC36092,SSK1	budding uninhibited by benzimidazoles 1 homolog beta (yeast)	--	25	Nucleus	kinase			701	12236	171576
C/ebp	C/ebpt,Cebp	--	--	7	Cytoplasm	group
CA2	AI131712,CA-II,CAR2,Carbonic anhydrase 2,Ltw-5,Lvtw-5	carbonic anhydrase II	P00918	4	Cytoplasm	enzyme	Diagnosis,Unspecified Application	methazolamide, hydrochlorothiazide, acetazolamide, trichloromethiazide, dorzolamide, chlorothiazide, dorzolamide/timolol, brinzolamide, chlorthalidone, benzthiazide, sulfacetamide, topiramate	760	12349	54231
Calcineurin A	Cna,CnA catalytic subunit,Pp2b A Subunit,PP2B CATALYTIC SUBUNIT,Pp2b Subunit A,Ppp3c	--	--	18	unknown	group
Calcineurin protein(s)	Calcineurin,Calcineurin protein(s),CaN,Pp3	--	--	17	Cytoplasm	complex
CALML5	2310037J09Rik,AI649108,CALM4,Calmodulin 4,CLSP,DD112,SCARF	calmodulin-like 5	Q9NZT1	22	Cytoplasm	other			51806	80796	364774
Calpain	CALCIUM DEPENDENT PROTEASE,M calpain	--	--	15	Cytoplasm	complex
CAND1	2310038O07Rik,6330512O03Rik,AI195005,AI846556,D10ERTD516E,DKFZp434M1414,FLJ10114,FLJ10929,FLJ38691,FLJ90441,KIAA0829,mKIAA0829,Similar to CLIP-170-related,TIP120,TIP120A,Tp120a	cullin-associated and neddylation-dissociated 1	Q86VP6	13	Cytoplasm	transcription regulator			55832	71902	117152
CANX	1110069N15Rik,AI988026,CALNEXIN,Cell adhesion molecule with homology to l1cam precursor,CNX,D11Ertd153e,FLJ26570,IP90,P90,Similar to calnexin	calnexin	P27824	24	Cytoplasm	other			821	12330	29144
CAP1	Adenylyl cyclase-associated,CAP,Cap adenylate cyclase associated protein 1,CAP1-PEN,Mch1,MGC108691	CAP, adenylate cyclase-associated protein 1 (yeast)	Q01518	14	Plasma Membrane	other			10487	12331	64185
CAPN2	AI326419,CALCIUM ACTIVATED NEUTRAL PROTEINASE,CALPAIN II,Calpain2,CANP2,CANPL2,CANPml,Capa-2,FLJ39928,M-CALPAIN,M-CALPIN,M80,mCANP	calpain 2, (m/II) large subunit	P17655	15	Cytoplasm	peptidase			824	12334	29154
CAPZB	1700120C01Rik,AI325129,CAPB,CAPPB,Cappb1,Capping protein beta 1,CAPZ,Capz beta,CPB1,CPB2,CPbeat2,CPbeta1,CPbeta2,DKFZp686K0524,F-Actin Capping Protein beta,F-CAPPING,FLJ12274,FLJ44693,MGC104401,MGC129749,MGC129750,MGC95097	capping protein (actin filament) muscle Z-line, beta	P47756	10	Cytoplasm	other			832	12345	298584
CASP2	CASPASE-2,ICH-1,NEDD-2	caspase 2, apoptosis-related cysteine peptidase	P42575	13	Cytoplasm	peptidase			835	12366	64314
Caspase	Caspase-1,ICE,interleukin 1 converting enzyme,interleukin 1beta-converting endopeptidase,interleukin 1beta-converting enzyme,interleukin-1beta convertase,interleukin-1beta precursor proteinase,precursor interleukin-1beta converting enzyme,pro-interleukin 1beta proteinase,prointerleukin 1beta protease,protease A,protease VII,YVADase	--	--	11	Cytoplasm	group	Efficacy
CBLL1	AI467391,c-Cbl-like,FLJ23109,HAKAI,MGC163401,MGC163403,RNF188	Cas-Br-M (murine) ecotropic retroviral transforming sequence-like 1	Q75N03	23	Nucleus	enzyme			79872	104836	314028
CBR1	AW261796,Carbonyl Reductase,CBR,CR,CRN,hCBR1,MGC124927,Ocr,SDR21C1	carbonyl reductase 1	--	23	Cytoplasm	enzyme	Response to Therapy		873	12408	29224
CBS	AI047524,AI303044,CYSTATHIONINE BETA SYNTHASE,Cytochrome H450,HIP4,MGC18856,MGC18895,MGC37300	cystathionine-beta-synthase	P35520	21	Cytoplasm	enzyme			875	12411	24250
CBX4	HPC2,MGC143697,MGC143698,MPc2,NBP16,PC2	chromobox homolog 4	O00257	1	Nucleus	transcription regulator			8535	12418	501403
CCAR1	2610511G16RIK,9430036H15Rik,CARP-1,DIS,MGC44628,MGC90759,RGD1560358,RP11-437A18.1	cell division cycle and apoptosis regulator 1	Q8IX12	23	Nucleus	other			55749	67500	361849
CCNE1	AW538188,CCNE,CycE1,CYCLE,CYCLIN E,CYCLIN E1	cyclin E1	--		Nucleus	transcription regulator			898	12447	25729
CCNE2	AV063769,CYCE2,CYCLIN E2	cyclin E2	--	25	Nucleus	other			9134	12448	362485
CCNL1	2610030E23Rik,Ania-6a,AU018493,BM-001,Ccnl,CYCLIN L,MGC93069,PRO1073	cyclin L1	Q9UK58		Nucleus	other			57018	56706	114121
CCNT2	2900041I18Rik,C81304,CYCLIN T2,CYCT2,FLJ13583,FLJ90560,MGC134840,P-FEBb	cyclin T2	O60583	19	Nucleus	transcription regulator			905	72949	304758
CCT2	99D8.1,CCT-beta,CCTB,chaperonin containing TCP1, subunit 2 (beta),Chaperonin subunit 2,MGC142074,MGC142076,MGC94480,PRO1633,T-COMPLEX PROTEIN 1 BETA SUBUNIT,TCP-1-beta	chaperonin containing TCP1, subunit 2 (beta)	P78371	10	Cytoplasm	kinase			10576	12461	299809
CCT3	AL024092,CCT-gamma,CCT1 GAMMA,CCTG,Chaperonin subunit 3 (gamma),Matricin,MGC72950,PIG48,TCP-1-gamma,Tcp1-rs3,TriC-P5,TRIC5	chaperonin containing TCP1, subunit 3 (gamma)	P49368	10	Cytoplasm	other			7203	12462	295230
CCT4	2610204B21RIK,A45,C78323,CCT-DELTA,Cctd,MGC126164,MGC126165,SRB,T complex protein 1, delta subunit,TCP1 DELTA	chaperonin containing TCP1, subunit 4 (delta)	P50991	10	Cytoplasm	other			10575	12464	29374
CCT5	CCT-epsilon,CCTE,Chaperonin subunit 5,Chaperonin subunit 5 (epsilon),KIAA0098,mKIAA0098,Similar to cct epsilon subunit,T-complex protein 1 epsilon,T-complex protein 1 epsilon subunit,TCP-1-epsilon,TCPE	chaperonin containing TCP1, subunit 5 (epsilon)	P48643	10	Cytoplasm	other			22948	12465	294864
CCT7	AA408524,AL022769,CCT-ETA,CCTH,Cctz,Chaperonin 7,Chaperonin subunit 7,MGC110985,NIP7-1,TCP1ETA	chaperonin containing TCP1, subunit 7 (eta)	Q99832	10	Cytoplasm	other			10574	12468	297406
CCT8	AI132397,C21orf112,Cctq,Chaperonin subunit 8,D21S246,KIAA0002,PRED71,T-COMPLEX PROTEIN 1, THETA SUBUNIT,TCP1 THETA,Tcpq	chaperonin containing TCP1, subunit 8 (theta)	P50990	10	Cytoplasm	enzyme			10694	12469	288305
CCT6A	CCT-zeta,CCT-zeta-1,CCT6,Cctz,Cctz-1,Chaperonin 6a,HTR3,LOC100038887,MGC125121,MGC126214,MGC126215,MoDP-2,TCP-1-zeta,TCP20,TCPZ,TTCP20	chaperonin containing TCP1, subunit 6A (zeta 1)	P40227	10	Cytoplasm	other	Diagnosis		908	12466	288620
CD3EAP	1190028F09,2610103M17RIK,ASE,ASE-1,CAST,LOC686776,MGC118851,PAF49,RGD1305916	CD3e molecule, epsilon associated protein	O15446		Nucleus	other			10849	70333	680493
Cdc2		--	--	14	Cytoplasm	group
CDH1	AA960649,Arc-1,Cadherin 1,Cadherin E,CD324,CDHE,CSEIL,E-CADHERIN,E-CADHERIN 120 KDA,ECAD,L-CAM,MGC107495,Um,UVO,uvomorulin	cadherin 1, type 1, E-cadherin (epithelial)	--	23	Plasma Membrane	other	Diagnosis,Disease Progression,Efficacy,Prognosis		999	12550	83502
CDIPT	9530042F15Rik,D7Bwg0575e,MGC1328,PIS,PIS1,PtdIns synthase	CDP-diacylglycerol--inositol 3-phosphatidyltransferase	O14735		Cytoplasm	enzyme			10423	52858	192260
CDK2	A630093N05Rik,CDC2,CDC2-RELATED KINASE,Cyclin A associated kinase,CYCLIN E ASSOCIATED KINASE,CYCLIN E-DEPENDENT KINASE,p33(CDK2),p33CDK2	cyclin-dependent kinase 2	P24941	14	Nucleus	kinase	Disease Progression,Prognosis	BMS-387032, flavopiridol	1017	12566	362817
Cdk	Cyclin-Dependent Kinases,G1 CDK	--	--	14	Nucleus	group
CDK2-CyclinE	CyclinE-CDK2	--	--	17	Nucleus	complex
CDK5RAP2	2900018K03Rik,an,C42,C48,Cep215,DKFZp686B1070,DKFZp686D1070,KIAA1633,LOC286919,MCPH3,MGC38528,mKIAA1633	CDK5 regulatory subunit associated protein 2	Q96SN8	22	Cytoplasm	other			55755	214444	286919
CDKN2A	Arf,ARF-INK4a,CDK4I,CDKN2,CMM2,CYCLIN-DEPENDENT KINASE INHIBITOR 2A,INK4,INK4A,INK4a-ARF,Ink4a/Arf,MLM,MTS-1,P14,p14/ARF,P14ARF,p14ARF/ p16INK4a,P16,p16(INK4a),P16-INK4A,p16/ INK4a,p16Cdkn2a,P16INK4,P19,p19ARF,PCTR1,TP16	cyclin-dependent kinase inhibitor 2A (melanoma, p16, inhibits CDK4)	--		Nucleus	transcription regulator	Diagnosis,Disease Progression,Efficacy,Prognosis,Response to Therapy,Safety		1029	12578	25163
CDX2	CDX-3,CDX2/3	caudal type homeobox 2	Q99626	24	Nucleus	transcription regulator	Prognosis		1045	12591	66019
Cebp		--	--	18	unknown	complex
CEBPA	C/EBP ALPHA,C/EBP ALPHA P30,C/EBP ALPHA P42,C/EBP-α,C/ERB,CBF-A,CEBP,Cebp Alpha,CEBPα,DBPCEP,p42,Zinc Finger Homeobox 1b	CCAAT/enhancer binding protein (C/EBP), alpha	--		Nucleus	transcription regulator	Diagnosis,Disease Progression,Prognosis		1050	12606	24252
CEBPB (includes EG:1051)	Agp/eb,C/EBP BETA,C/Ebp Beta-Lip,C/EBP-β,Ccaat/enhancer binding protein beta,CEBP BETA,CEBP-β,CRP2,IL-6DBP,LAP,MGC32080,NF-IL6,NF-M,TCF5	CCAAT/enhancer binding protein (C/EBP), beta	P17676	9	Nucleus	transcription regulator			1051	12608	24253
CEBPD	C/EBP DELTA,C/EBPd,C/EBPδ,Ccaat/enhancer binding protein delta,CEBP DELTA,CELF,CRP3,NF-IL6BETA	CCAAT/enhancer binding protein (C/EBP), delta	P49716	18	Nucleus	transcription regulator			1052	12609	25695
CEBPE	C/EBP EPSILON,C/EBPe,C/EPBe,CRP1,Gm294,MGC124002,MGC124003	CCAAT/enhancer binding protein (C/EBP), epsilon	Q15744	18	Nucleus	transcription regulator			1053	110794	25410
CENPC1	CENP-C,hcp-4,MIF2	centromere protein C 1	Q03188	20	Nucleus	other			1060	12617	305270
CENPI	AI504163,FSHPRH1,LRPR1,MGC40943,MIS6,RNALRP	centromere protein I	Q92674	16	Nucleus	other			2491	102920	25448
CFLAR	2310024N18RIK,A430105C05Rik,AU021929,C-FLIP,c-FLIPR,CASH,CASP8AP1,Caspase 8 associated protein,CASPER,cFLIP short,CLARP,ENSMUSG00000072980,FLAME,FLAME-1,FLICE-LIKE IP,FLIP,Gm9845,I-FLICE,MGC103395,MGC108616,MRIT	CASP8 and FADD-like apoptosis regulator	O15519	18	Cytoplasm	other	Prognosis,Unspecified Application		8837	12633	117279
CHD1	4930525N21Rik,AI851787,AW555109,Cadherin E,DKFZp686E2337,DNABP1,E-cadherin,MGC141554	chromodomain helicase DNA binding protein 1	O14646	21	Nucleus	enzyme			1105	12648
CHD4	9530019N15Rik,AA617397,BC005710,D6Ertd380e,DKFZp686E06161,KIAA4075,MGC11769,Mi-2b,MI2,MI2 BETA,mKIAA4075	chromodomain helicase DNA binding protein 4	Q14839	8	Nucleus	enzyme			1108	107932	117535
CHD8	5830451P18RIK,AU015341,DKFZp686N17164,DUPLIN,HELSNF1,KIAA1564,LOC65027,mKIAA1564	chromodomain helicase DNA binding protein 8	Q9HCK8	6	Nucleus	enzyme			57680	67772	65027
Chuk-Ikbkb-Ikbkg	IKKα-IKKβ-IKKγ	--	--	18	Cytoplasm	complex
CIRH1A	CIRHIN,FLJ14728,FLJ17146,KIAA1988,MGC95114,NAIC,Teg-292,TEX292,UTP4	cirrhosis, autosomal recessive 1A (cirhin)	Q969X6	6	Nucleus	other			84916	21771	291987
CK1	Casein Kinase I,Casein Kinase1,CKI	--	--	5	Cytoplasm	group
Ck2	Casein kinase 2,Casein Kinase II,CKII	--	--	6	Cytoplasm	complex
CKB	B-CK,Ck-3,CKBB,Ckbr,Creatine kinase b chain,Creatine kinase b type,Creatinine phosphokinase bb,RATCKBR	creatine kinase, brain	P12277		Cytoplasm	kinase			1152	12709	24264
CLCN7	AA409691,AW538136,CLC-7,D17Wsu51e,FLJ26686,FLJ39644,FLJ46423,OPTA2,OPTB4	chloride channel 7	P51798		Plasma Membrane	ion channel			1186	26373	29233
CLOCK	5330400M04Rik,bHLHe8,KAT13D,KIAA0334,mKIAA0334	clock homolog (mouse)	--	23	Nucleus	transcription regulator			9575	12753	60447
CLTC	3110065L21Rik,CHC,CHC17,Clathrin Hc,CLATHRIN HEAVY CHAIN,CLH-17,CLTCL2,Hc,KIAA0034,MGC92975,R74732	clathrin, heavy chain (Hc)	Q00610	10	Plasma Membrane	other			1213	67300	54241
CNP	2,3''-CYCLIC NUCLEOTIDE 3''-PHOSPHODIESTERASE,CNP1,CNPase,CNPF,CNPI,CNPII	2',3'-cyclic nucleotide 3' phosphodiesterase	--	25	Cytoplasm	enzyme			1267	12799	25275
COL4A5	ASLN,ATS,CA54,Collagen iv alpha5,COLLAGEN TYPE IV, ISOTYPE 4,COLLAGEN TYPE IV, ISOTYPE 5,MGC167109,MGC42377,Procollagen iv alpha5,RGD1565499	collagen, type IV, alpha 5	--	23	Extracellular Space	other	Efficacy	collagenase clostridium histolyticum	1287	12830	363457
Collagen type I	Cn1,COL1,Collagen I,Collagen Type1,Collagen1,TYPE 1 COLLAGEN,TYPE I COLLAGEN	--	--	16	unknown	complex	Diagnosis
Collagen type IV	COL4,collagen IV	--	--	16	unknown	complex	Disease Progression
Collagen(s)	Collagen,Collagen(s)	--	--	19	Extracellular Space	complex
COP I		--	--	8	unknown	complex
COPA	Alpha-coat,Alpha-COP,AU040324,COP1A,FLJ26320,HEP-COP,xenin	coatomer protein complex, subunit alpha	P53621	8	Cytoplasm	transporter			1314	12847	304978
COPS5	AI303502,CSN5,JAB1,JUN ACTIVATION DOMAIN BINDING,MGC112728,MGC3149,MOV-34,P38,p38 JAB1,SGN5	COP9 constitutive photomorphogenic homolog subunit 5 (Arabidopsis)	--		Nucleus	transcription regulator			10987	26754	312916
CORO1C	AL022675,AW455561,AW548837,coronin-3,HCRNN4,MGC102522,RGD1564490	coronin, actin binding protein, 1C	Q9ULV4		Cytoplasm	other			23603	23790	501841
Coup-Tf	NR2F	--	--	12	Nucleus	group
CPOX	Coprogen oxidase,Coproporphyrinogen Oxidase,CPO,CPX,HCP,MGC124847	coproporphyrinogen oxidase	P36551	8	Cytoplasm	enzyme			1371	12892	304024
CPSF3	CPSF,Cpsf 73kDa,CPSF-73,MGC118660,MGC124885,YSH1	cleavage and polyadenylation specific factor 3, 73kDa	Q9UKF6		Nucleus	enzyme			51692	54451	298916
Creatine Kinase	adenosine triphosphate-creatine transphosphorylase,ATP:creatine N-phosphotransferase,ATP:creatine phosphotransferase,BB-CK,CK,CK-BB,CK-MB,CK-MM,CKMiMi,Cpk,Creatine Phosphokinase,creatine phosphotransferase,Creatinine kinase,Creatinine phosphokinase,MB-CK,Mi-CK,MiMi-CK,MM-CK,phosphocreatine kinase	--	--	6	unknown	group	Efficacy,Safety
CREB1	2310001E10Rik,3526402H21RIK,AV083133,CAMP RESPONSE ELEMENT BINDING PROTEIN 1,Cbp,CREB,MGC9284,X2BP	cAMP responsive element binding protein 1	P16220	15	Nucleus	transcription regulator			1385	12912	81646
CREB5	CRE-BPA,D430026C09Rik,RGD1566107	cAMP responsive element binding protein 5	Q02930	15	Nucleus	transcription regulator			9586	231991	500131
Creb	Creb protein	--	--		Nucleus	group
CS	2610511A05Rik,9030605P22Rik,BB234005,Cis,CITRATE SYNTHASE	citrate synthase	O75390	6	Cytoplasm	enzyme			1431	12974	170587
CSE1L	2610100P18Rik,AA407533,Capts,CAS,CELL APOPTOSIS SUSCEPTIBILITY,CSE1,MGC117283,MGC130036,MGC130037,XPO2	CSE1 chromosome segregation 1-like (yeast)	P55060	2	Nucleus	transporter			1434	110750	362273
CTBP1	50-kDaBFA-inducedADP-ribosylatedsubstrate,BARS,BARS-50,CTBP,CtBP1-L,CtBP1-S,CtBP3/BARS,D4S115h,D5H4S115,D5H4S115E,MGC104684,MGC93318	C-terminal binding protein 1	Q13363	1	Nucleus	enzyme			1487	13016	29382
CTBP2	AA407280,D7Ertd45e,GTRGEO6,Ribeye	C-terminal binding protein 2	--		Nucleus	transcription regulator			1488	13017	81717
Ctbp		--	--	13	Nucleus	group
CTCF (includes EG:10664)	AW108038,Transcription Repressor	CCCTC-binding factor (zinc finger protein)	P49711	6	Nucleus	transcription regulator			10664	13018	83726
CYC1	2610002H19Rik,AA408921,Cytochrome c1,MGC134266,UQCR4	cytochrome c-1	P08574	11	Cytoplasm	enzyme			1537	66445	300047
Cyclin A		--	--	14	Nucleus	group	Prognosis,Unspecified Application
Cyclin A/Cdk2	CDK2-Cyclin A	--	--	14	Nucleus	complex
Cyclin B		--	--	14	Cytoplasm	group	Efficacy
Cyclin D	CycD,Cyclin D1	--	--	14	Nucleus	group	Efficacy,Prognosis,Unspecified Application
CYCS	CYC,CYCSA,CYTC,CytoC,CYTOCHROME C,ENSMUSG00000062038,Gm10108,HCS,MGC93634,THC4	cytochrome c, somatic	P99999	11	Cytoplasm	enzyme			54205	670717	25309
CYFIP1	E030028J09Rik,FLJ45151,KIAA0068,l(7)1Rl,l71Rl,l7Rl1,mKIAA0068,P140SRA-1,pl-1,SHYC,SRA1	cytoplasmic FMR1 interacting protein 1	Q7L576		Cytoplasm	other			23191	20430	308666
Cytochrome c	Apocytochrome C,Cycc1,Cyt C	--	--	11	Cytoplasm	group	Unspecified Application
Cytochrome c oxidase	1.9.3.1,Complex IV,complex IV (mitochondrial electron transport),COX,Mitochondrial Complex IV,respiratory chain complex IV	--	--	11	Cytoplasm	complex
Cytokeratin		--	--	1	unknown	group	Diagnosis,Disease Progression,Efficacy,Prognosis
Cytoplasmic Dynein	Dynein Motor	--	--	9	unknown	complex
DAPK3	DAP kinase 3,DAPKL,dlk,FLJ36473,MYPTK1,ZIP,Zip kinase,ZIPK	death-associated protein kinase 3	O43293	20	Cytoplasm	kinase			1613	13144	64391
DARS2	5830468K18RIK,Asp synthetase,Aspartyl-tRNA Synthetase 2,ASPRS,FLJ10514,LBSL,MGC124683,MGC99963,MT-ASPRS,RGD1308286,RP3-383J4.2	aspartyl-tRNA synthetase 2, mitochondrial	Q6PI48		Cytoplasm	enzyme			55157	226539	304919
DARS	5730439G15Rik,ASPARTYL-TRNA SYNTHETASE,ASPRS,DKFZp781B11202,DRS,DRS1,MGC111579	aspartyl-tRNA synthetase	P14868		Cytoplasm	enzyme			1615	226414	116483
DAXX	BING2,DAP6,EAP1,MGC126245,MGC126246,MGC150289,MGC156601,PML ASSOCIATED FACTOR	death-domain associated protein	Q9UER7	20	Nucleus	transcription regulator			1616	13163	140926
DDB1	AA408517,DDBA,DNA-damage-binding protein 1,p125,p127-Ddb1,UV-DDB1,UVDDB,XAP1,XPCE,XPE,Xpe uv-damage DNA binding factor,XPE-BF	damage-specific DNA binding protein 1, 127kDa	Q16531	8	Nucleus	other			1642	13194	64470
DDOST	AGE-R1,KIAA0115,MGC2191,OKSWcl45,OST,OST48,WBP1	dolichyl-diphosphooligosaccharide--protein glycosyltransferase	P39656	1	Cytoplasm	enzyme			1650	13200	313648
DDX1	AA409185,DBP-RB,DEAD-box protein 1,UKVH5d	DEAD (Asp-Glu-Ala-Asp) box polypeptide 1	Q92499	5	Nucleus	enzyme			1653	104721	84474
DDX5	2600009A06RIK,Dead box polypeptide 5,DEAD-box protein p68,Dead5,DKFZp434E109,DKFZp686J01190,G17P1,HELR,HLR1,HUMP68,MGC118083,MGC93965,P68,p68 RNA Helicase,RNA helicase p68,Tnz2	DEAD (Asp-Glu-Ala-Asp) box polypeptide 5	P17844	20	Nucleus	enzyme			1655	13207	287765
DDX17	2610007K22RIK,A430025E01Rik,AI047725,C80929,DEAD-box protein p72,DEAD/H box RNA helicase p72,DKFZp761H2016,Gm926,MGC109323,MGC79147,P72,RH70	DEAD (Asp-Glu-Ala-Asp) box polypeptide 17	Q92841	20	Nucleus	enzyme			10521	67040	315133
DDX18	2310005B10Rik,FLJ33908,MGC117904,MGC95311,MRDB	DEAD (Asp-Glu-Ala-Asp) box polypeptide 18	Q9NVP1	25	Nucleus	enzyme			8886	66942	308490
DDX21	AI255159,AL022742,D10Ertd645e,D10Wsu42e,Ddx21a,DKFZp686F21172,GU HELICASE,GUA,GURDB,MGC112658,MGC124980,RH-II/GU,RH-II/GuA,RNA HELICASE GUALPHA,SIMILAR TO RBP-1	DEAD (Asp-Glu-Ala-Asp) box polypeptide 21	Q9NR30	17	Nucleus	enzyme			9188	56200	317399
DDX42	1810047H21Rik,AW319508,AW556242,B430002H05Rik,FLJ43179,RHELP,RNA helicase,RNAHP,SF3b125	DEAD (Asp-Glu-Ala-Asp) box polypeptide 42	Q86XP3		Cytoplasm	enzyme			11325	72047	303607
DDX50	4933429B04Rik,8430408E17RIK,GU2,GUB,MGC109605,MGC3199,RH-II,RH-II/GuB,Similar to gu2	DEAD (Asp-Glu-Ala-Asp) box polypeptide 50	Q9BQ39		Nucleus	enzyme			79009	94213	361848
DDX3X	D1Pas1-rs2,DBX,DDX14,DDX3,Fibroblast growth factor inducible 14,FIN14,Fn14,HLP2	DEAD (Asp-Glu-Ala-Asp) box polypeptide 3, X-linked	O00571	5	Nucleus	enzyme	Diagnosis		1654	13205	317335
DGKE	C87606,DAGK5,DAGK6,DGK,DGK epsilon,LOC497978,MGC124991	diacylglycerol kinase, epsilon 64kDa	P52429		Cytoplasm	kinase			8526	56077	497978
DHCR7	7-DEHYDROCHOLESTEROL REDUCTASE,7-DHC reductase,7DHCR,AA409147,D7SR,FLJ10664,MGC93039,SLOS,STEROL DELTA7-REDUCTASE	7-dehydrocholesterol reductase	Q9UBM7	6	Cytoplasm	enzyme	Diagnosis		1717	13360	64191
DHX9	AI326842,Atp dependent DNA helicase ii,DDX9,FLJ17406,HEL-5,LEUKOPHYSIN,LKP,MGC90954,mHEL-5,NDH II,NDH2,RHA,RNA HELICASE A	DEAH (Asp-Glu-Ala-His) box polypeptide 9	Q08211		Nucleus	enzyme			1660	13211	304859
DKC1	BC068171,CBF5,DKC,DYSKERIN,FLJ97620,MGC107501,NAP57,NOLA4,RP23-62O13.1,Weakly similar to tyrosine-prtein kinase jak3,XAP101	dyskeratosis congenita 1, dyskerin	O60832	3	Nucleus	enzyme			1736	245474	170944
DLAT	6332404G05Rik,DIHYDROLIPOAMIDE S-ACETYLTRANSFERASE,DLTA,E2,E2P,PDC-E2,PDH-E2	dihydrolipoamide S-acetyltransferase	P10515		Cytoplasm	enzyme			1737	235339	81654
DLD	AI315664,AI746344,DLDH,E3,GCSL,LAD,PHE3	dihydrolipoamide dehydrogenase	P09622		Cytoplasm	enzyme			1738	13382	298942
DLGAP3	BC058433,DAP-3,Gkap3,PRPL8,SAPAP3	discs, large (Drosophila) homolog-associated protein 3	O95886		Cytoplasm	other			58512	242667	286923
DLX2	AW121999,Dlx5,TES-1	distal-less homeobox 2	Q07687	19	Nucleus	transcription regulator			1746	13392	296499
DMRT1	DMT1	doublesex and mab-3 related transcription factor 1	--		Nucleus	transcription regulator			1761	50796	114498
DMTF1	Dimp,DMP1,DMTF,FLJ25188,FLJ41265,FLJ76054,hDMP1	cyclin D binding myb-like transcription factor 1	--		Nucleus	transcription regulator			9988	23857	114485
DNAJ	HSP40	--	--	21	unknown	group
DNAJC9	5330419I01RIK,AU020082,HDJC9,JDD1,KIAA0974,SB73	DnaJ (Hsp40) homolog, subfamily C, member 9	Q8WXX5		unknown	other			23234	108671	364240
DNM1L	6330417M19Rik,AI450666,DLP1,Dnml1,DNMLP1,DRP1,DVLP,DYMPLE,Dynamin-related protein 1,DYNIV-11,FLJ41912,HDYNIV,MGC90593,python,VPS1	dynamin 1-like	O00429		Cytoplasm	enzyme			10059	74006	114114
DNMT1	AIM,CXXC9,Cytosine 5-methyltransferase,DMT,DNA METHYLTRANSFERASE 1,DNA MTASE,DNA MTase HsaI,DNMT,Dnmt1o,FLJ16293,HSN1E,m.MmuI,MCMT,Met-1,MGC104992,MommeD2,MTase	DNA (cytosine-5-)-methyltransferase 1	P26358	22	Nucleus	enzyme	Diagnosis		1786	13433	84350
DNMT3A	AU015806,DNA MTase HsaIIIA,DNMT3A2,M.HsaIIIA,MGC109195,W91664	DNA (cytosine-5-)-methyltransferase 3 alpha	Q9Y6K1	12	Nucleus	enzyme			1788	13435	444984
DROSHA	1110013A17Rik,AI874853,ETOHI2,HSA242976,MGC115770,RANSE3L,RGD1307626,RN3,RNASE3L,RNASEN	drosha, ribonuclease type III	--	25	Nucleus	enzyme			29102	14000	310159
DSC1	CDHF1,DG2/DG3,DGIV/V,Dsc1b,MGC129348	desmocollin 1	Q08554	1	Plasma Membrane	other			1823	13505	291759
DSG1	BB010119,CDHF4,DESMOGLEIN 1,DG1,DSG,Dsg1a,DSG1B,Dsg1c,Dsg5,LOC679010,PPKS1,SPPK1	desmoglein 1	Q02413	1,23	Plasma Membrane	other			1828	225256|13510	291755
DSP	2300002E22Rik,5730453H04RIK,AA407887,AA407888,AW109828,DESMOPLAKIN,DP,DPI,DPII	desmoplakin	P15924	1	Plasma Membrane	other			1832	109620	306871
DUSP8	5530400B01RIK,AI593498,C11orf81,FLJ42476,FLJ42958,HB5,HVH-5,HVH8,M3/6,Nttp1,VH5	dual specificity phosphatase 8	--	23	Nucleus	phosphatase			1850	18218	361679
DYNC1H1	9930018I23RIK,AI894280,CMT20,DHC1,DHC1a,DKFZp686P2245,DNCH1,DNCHC1,DNCL,Dnec1,DNECL,DYHC,Dynein heavy chain,HL-3,KIAA0325,Loa,MAP1C,mKIAA0325,P22,SWL	dynein, cytoplasmic 1, heavy chain 1	Q14204	9	Cytoplasm	peptidase			1778	13424	29489
Dynein		--	--	9	Cytoplasm	complex
DYRK1A	2310043O08Rik,D16Ertd272e,D16Ertd493e,DUAL-SPECIFICITY TYROSINE-(Y)-PHOSPHORYLATION REGULATED KINASE 1A,DYRK,DYRK1,ENSMUSG00000074897,Gm10783,HP86,MGC150253,MGC150254,mmb,MNB,MNBH,Mp86,MRD7,PSK47	dual-specificity tyrosine-(Y)-phosphorylation regulated kinase 1A	Q13627	8	Nucleus	kinase			1859	13548	25255
E2F1	E2f,KIAA4009,mKIAA4009,RBAP1,RBBP3,RBP3	E2F transcription factor 1	--		Nucleus	transcription regulator	Disease Progression,Prognosis		1869	13555	399489
E2F2	9230110J10,E130207A07	E2F transcription factor 2	--		Nucleus	transcription regulator			1870	242705
E2F3	DKFZp686C18211,E2F3A,KIAA0075,LOC691420,MGC104598,mKIAA0075,RGD1561600	E2F transcription factor 3	--		Nucleus	transcription regulator	Diagnosis,Efficacy,Unspecified Application		1871	13557	291105
E2F4	2010111M04Rik,AI427446	E2F transcription factor 4, p107/p130-binding	--		Nucleus	transcription regulator			1874	104394	307794
E2f		--	--	14	Nucleus	group
EAF2	AW048865,BM040,Festa,FESTA-L,FESTA-S,TRAITS,U19	ELL associated factor 2	--		Nucleus	transcription regulator			55840	106389	266787
EBNA1BP2	1810014B19Rik,AA537058,B830003A16RIK,C81321,EBP2,MGC105572,NOBP,P40	EBNA1 binding protein 2	Q99848	3	Nucleus	other			10969	69072	114021
EEF2	EF2,EUKARYOTIC TRANSLATION ELONGATION FACTOR 2,MGC98463,Similar to mapkk,Transferase II	eukaryotic translation elongation factor 2	P13639	24	Cytoplasm	translation regulator			1938	13629	29565
EEF1D	1700026P12RIK,5730529A16Rik,AL023999,DELTA EF1,EEF1 DELTA,EF-1D,EF1 DELTA,EF1B BETA,FLJ20897,FP1047,Tef1 delta,Tef1d,UNQ601	eukaryotic translation elongation factor 1 delta (guanine nucleotide exchange protein)	P29692	4	Cytoplasm	translation regulator			1936	66656	300033
EEF2K	C86191,eEF-2 kinase,HSU93850,MGC45041,SMEF2K	eukaryotic elongation factor-2 kinase	--	23	Cytoplasm	kinase			29904	13631	25435
EFTUD2	DKFZp686E24196,FLJ44695,KIAA0031,p116,snRNP C U5,Snrp116,Snu114,U5 small nuclear ribonucleoprotein 116 kDa,U5-116,U5-116KD	elongation factor Tu GTP binding domain containing 2	Q15029	2	Nucleus	enzyme			9343	20624	287739
EIF2AK2	2310047A08Rik,4732414G15Rik,AI467567,AI747578,DAI,DOUBLE STRANDED RNA DEPENDENT PROTEIN KINASE,EIF2AK1,GCN4,IFNPKR,MGC126524,p68 kinase,PKR,PRKR,Tik	eukaryotic translation initiation factor 2-alpha kinase 2	P19525	22	Cytoplasm	kinase			5610	19106	54287
EIF2S1	0910001O23Rik,2410026C18Rik,EIF-2,EIF-2A,EIF-2ALPHA,eIF-2α,Eukaryotic Translation Initiation Factor 2 Alpha Subunit,MGC93488	eukaryotic translation initiation factor 2, subunit 1 alpha, 35kDa	P05198		Cytoplasm	translation regulator	Efficacy		1965	13665	54318
EIF4A1	BM-010,DDX2A,EIF-4A,eIF-4A-I,EIF4,Elongation factor 4 alpha	eukaryotic translation initiation factor 4A1	P60842	1	Cytoplasm	translation regulator			1973	13681	287436
Eif4g	Eif4 gamma,eIF4γ,elF4γ	--	--	24	Cytoplasm	group
EIF5B	A030003E17Rik,Abp7,BC018347,DKFZp434I036,FLJ10524,IF2,Initiation Factor M2,KIAA0741,LOC308306,LOC686553,LOC689581	eukaryotic translation initiation factor 5B	O60841		Cytoplasm	translation regulator			9669	226982	689581|308306
ELF4	AV314029,BC042423,ELFR,ENSMUSG00000053512,Gm9907,MEF,MEF1,MGC129343,MGC129361,MYELOID ELF-1-LIKE FACTOR,RGD1560743	E74-like factor 4 (ets domain transcription factor)	Q99607	24	Nucleus	transcription regulator			2000	56501	302811
ELK1	ELK,p62TCF,RGD:2549,TCF/ELK	ELK1, member of ETS oncogene family	P19419	19	Nucleus	transcription regulator			2002	13712	314436
ELK3	D430049E23Rik,EPR,ERP,Etrp,FLJ22425,NET,SAP2,SRF accessory protein 2	ELK3, ETS-domain protein (SRF accessory protein 2)	P41970	4	Nucleus	transcription regulator			2004	13713	362871
EMD	AW550900,EDMD,EMERIN,LEMD5,STA	emerin	P50402	18	Nucleus	other			2010	13726	25437
EN1	Engrailed-1,Mo-en.1	engrailed homeobox 1	--		Nucleus	transcription regulator			2019	13798	685360
EN2	AUTS1,BB131122,RGD1561842	engrailed homeobox 2	--		Nucleus	transcription regulator			2020	13799	499964
ENO1	0610008I15,AL022784,ALPHA ENOLASE,EG433182,ENO1L1,ENOLASE,ENOLASE 1,Enolase 1 alpha,Enolase alpha,Gm5506,MBP-1,MGC103111,MGC107267,MPB1,NNE,Phosphopyruvate hydratase,PPH	enolase 1, (alpha)	P06733	16,25	Cytoplasm	transcription regulator	Diagnosis		2023	13806|433182	24333
EP300	A430090G16,A730011L11,KAT3B,P300,p300 HAT,RSTS2	E1A binding protein p300	Q09472	17	Nucleus	transcription regulator			2033	328572	170915
EPAS1	bHLHe73,ECYT4,HIF-2ALPHA,Hif1alpha related factor,Hif2,HIF2A,HLF,HRF,MOP2,PASD2	endothelial PAS domain protein 1	Q99814	16	Nucleus	transcription regulator	Disease Progression,Prognosis		2034	13819	29452
EPHX1	AI195553,Ehm,Eph-1,EPHX,EPOX,Epoxide Hydrolase,EPXH1,HYL1,MEH,MEH8,Microsomal Colinesterase,MICROSOMAL EPOXIDE HYDROLASE	epoxide hydrolase 1, microsomal (xenobiotic)	P07099	15	Cytoplasm	peptidase	Diagnosis		2052	13849	25315
EPRS	2410081F06Rik,3010002K18Rik,BIFUNCTIONAL TRNA SYNTHETASE,C79379,DKFZp313B047,EARS,GLUPRORS,PARS,PIG32,Prs,QARS,QPRS	glutamyl-prolyl-tRNA synthetase	P07814		Cytoplasm	enzyme			2058	107508	289352
ER-α-Estradiol		--	--	10	Cytoplasm	complex
ERBB2IP	1700028E05Rik,ERBIN,LAP2,mKIAA1225,RGD1562952	erbb2 interacting protein	Q96RT1	19	Extracellular Space	cytokine			55914	59079	365661
ERK	p42/44 mapk	--	--	2	unknown	group	Efficacy
ERK1/2	p42/44 mapk,P42/p44 erk,p42/p44 MAP KINASE,P42/p44 mapk,p44/p42 MAPK	--	--	20	Cytoplasm	group
Erk1/2 dimer		--	--	20	Nucleus	complex
ESR1	AA420328,Alpha estrogen receptor,AU041214,DKFZp686N23123,ER,ER ALPHA,Er alpha (46 kDa isoform),ER-α,ER66,ERA,ER[a],ESR,ESRA,ESTR,ESTRA,ESTROGEN RECEPTOR ALPHA,ESTROGEN RECEPTOR1,NR3A1,RNESTROR,TERP-1	estrogen receptor 1	P03372	9	Nucleus	ligand-dependent nuclear receptor	Diagnosis,Disease Progression,Efficacy,Prognosis,Response to Therapy	17-alpha-ethinylestradiol, fulvestrant, beta-estradiol, estradiol 17beta-cypionate, estrone, estradiol valerate, 3-(4-methoxy)phenyl-4-((4-(2-(1-piperidinyl)ethoxy)phenyl)methyl)-2H-1-benzopyran-7-ol, bazedoxifene, estradiol valerate/testosterone enanthate, TAS-108, ethinyl estradiol/ethynodiol diacetate, estradiol acetate, esterified estrogens, estradiol cypionate/medroxyprogesterone acetate, co…	2099	13982	24890
Esr1-Esr1-estrogen-estrogen		--	--	20	Nucleus	complex
Esr1-Estrogen		--	--	20	Nucleus	complex
Esr1-Estrogen-Sp1		--	--	20	Nucleus	complex
ESRRG	DKFZp781L1617,ERR GAMMA,ERR3,Errg,ERRG2,FLJ16023,KIAA0832,LOC100504550,mKIAA0832,NR3B3	estrogen-related receptor gamma	P62508	20	Nucleus	ligand-dependent nuclear receptor	Unspecified Application		2104	26381	360896
Estrogen Receptor	ER	--	--	9	unknown	group	Diagnosis,Disease Progression,Efficacy,Prognosis,Response to Therapy
ESYT1	FAM62A,KIAA0747,MBC2,MGC124625,vp115	extended synaptotagmin-like protein 1	Q9BSJ8	23	unknown	other			23344	23943	29579
ETS1	AI196000,AI448617,C-ETS1,D230050P06,Etsoncb,EWSR2,FLJ10768,MGC124638,MGC130355,MGC18571,p42 ETS1,p51 ETS1,TPL1	v-ets erythroblastosis virus E26 oncogene homolog 1 (avian)	P14921	17	Nucleus	transcription regulator	Unspecified Application		2113	23871	24356
ETS	ETS-1/2	--	--	20	Nucleus	group
ETV4	AW414408,E1A-F,PEA3,PEAS3	ets variant 4	P43268	1	Nucleus	transcription regulator	Unspecified Application		2118	18612	360635
ETV5	1110005E01Rik,8430401F14Rik,ERM	ets variant 5	P41161	16	Nucleus	transcription regulator			2119	104156	303828
ETV6	AW123102,AW557856,MGC124677,MPE,TEL,TEL/ABL,TEL1	ets variant 6	P41212	17	Nucleus	transcription regulator			2120	14011	312777
FAH	FLJ51912,fumarylacetoacetase	fumarylacetoacetate hydrolase (fumarylacetoacetase)	P16930		Cytoplasm	enzyme			2184	14085	29383
FANCD2	2410150O07RIK,AU015151,BB137857,DKFZp762A223,FA-D2,FA4,FACD,FAD,FANCD,FLJ23826	Fanconi anemia, complementation group D2	Q9BXW9	14	Nucleus	other	Efficacy,Prognosis		2177	211651	312641
FARSA	0610012A19Rik,CML33,FARSL,FARSLA,FRSA,PheHA,Phenylalanine-tRNA synthetase-like, alpha-subunit	phenylalanyl-tRNA synthetase, alpha subunit	Q9Y285	25	Cytoplasm	enzyme			2193	66590	288917
FARSB	C76708,Farsa,Farsl,FARSLB,FRSB,HSPC173,MGC94847,PheHB,PHENYLALANYL tRNA SYNTHETASE BETA CHAIN,PheRS	phenylalanyl-tRNA synthetase, beta subunit	Q9NSD9	25	Cytoplasm	enzyme			10056	23874	301544
Fascin		--	--	1	Cytoplasm	group	Prognosis
FASN	A630082H08Rik,FAS,FATTY ACID SYNTHASE,FATTY ACID SYNTHETASE,Long chain fatty acyl-coa synthetase,MGC14367,MGC15706,NADP Dependent Oxidoreductase,OA-519,SDR27X1	fatty acid synthase	P49327	12	Cytoplasm	enzyme	Diagnosis,Efficacy,Prognosis		2194	14104	50671
FBL	AL022665,FIB,FIBRILLARIN,FLRN,MGC116371,RNU3IP1	fibrillarin	P22087		Nucleus	other			2091	14113	292747
FBLN5	A55,ARMD3,DANCE,EVEC,FIBL-5,FIBULIN 5,FLJ90059,UP50	fibulin 5	--	23	Extracellular Space	other			10516	23876	29158
FBRS	FBS,FBS1,FIBROSIN,FLJ11618	fibrosin	Q9HAH7		Extracellular Space	cytokine			64319	14123	691899
FDPS	6030492I17Rik,Ac2-125,AI256750,FARNESYL DIPHOSPHATE SYNTHASE,FARNESYL PYROPHOSPHATE SYNTHASE,Fdpsl1,FPP SYNTHASE,FPP synthetase,FPPS,FPS,KIAA1293,MGC107162,mKIAA1293	farnesyl diphosphate synthase	P14324	24	Cytoplasm	enzyme		YM 529, alendronic acid, pamidronic acid	2224	110196	83791
FEN1	AW538437,MF1,MGC94425,RAD2	flap structure-specific endonuclease 1	P39748	7	Nucleus	enzyme			2237	14156	84490
FERMT3	BC032204,C79673,KIND3,KINDLIN-3,MGC10966,MGC36836,MGC38286,MIG-2,MIG2B,RGD1310168,UNC112C,URP2,URP2SF	fermitin family member 3	Q86UX7	6	Cytoplasm	enzyme			83706	108101	309186
FGF8	AIGF,HBGF-8,KAL6,MGC149376,MGC59627	fibroblast growth factor 8 (androgen-induced)	--	25	Extracellular Space	growth factor			2253	14179	29349
Fgf	Fibroblast growth factor	--	--	19	Extracellular Space	group
Fibrinogen	FG	--	--	6	Plasma Membrane	complex	Diagnosis,Disease Progression,Efficacy,Prognosis,Safety
Filamin	Abp,ABP280/FH1	--	--	21	Cytoplasm	group
FLI1	EWS/FLI1,EWSR2,SIC-1	Friend leukemia virus integration 1	Q01543	17	Nucleus	transcription regulator			2313	14247	315532
FLNA	ABP-280,ABP1,ABPX,CVD1,DILP2,DKFZp434P031,F730004A14Rik,FILAMIN A,FILAMIN-1,FILAMIN-28,FLJ43642,FLN,FLN1,FMD,LOC100131857,MNS,NEWGENE 1560614,NHBP,OPD,OPD1,OPD2,RGD1560614,XLVD,XMVD	filamin A, alpha	P21333	21	Cytoplasm	other			2316	192176	293860
FLNC	1110055E19RIK,ABP-280,ABP280A,ABPA,ABPL,FILAMIN GAMMA,FLJ10186,FLN2,GAMMA FILAMIN,MFM5,MPD4	filamin C, gamma	Q14315	21	Cytoplasm	other	Diagnosis		2318	68794	362332
FMO2	2310008D08Rik,2310042I22Rik,AW107733,FLJ40826,FMO1B1,MGC28212	flavin containing monooxygenase 2 (non-functional)	Q99518		Cytoplasm	enzyme			2327	55990	246245
FNBP4	DKFZp686M14102,DKFZp779I1064,FBP30,FBP4,FLJ41904,Fnbp30,KIAA1014,MGC105867,mKIAA1014	formin binding protein 4	Q8N3X1	18	Nucleus	other			23360	55935	311183
FOS	AP-1,C-FOS,D12Rfj1,p55,V-FOS	FBJ murine osteosarcoma viral oncogene homolog	P01100	4	Nucleus	transcription regulator	Diagnosis,Efficacy,Prognosis		2353	14281	314322
FOSB	AP-1,DKFZp686C0818,fra-2,G0S3,GOS3,GOSB,KW3,MGC42291	FBJ murine osteosarcoma viral oncogene homolog B	--		Nucleus	transcription regulator	Prognosis		2354	14282	308411
FOSL2	FLJ23306,FRA-2	FOS-like antigen 2	P15408	16	Nucleus	transcription regulator	Prognosis		2355	14284	25446
FOXA1	HNF3 ALPHA,HNF3A,MGC33105,TCF3A,Transcription Factor 3a	forkhead box A1	--		Nucleus	transcription regulator	Diagnosis,Disease Progression,Prognosis		3169	15375	25098
FOXF2	Fkh20,FKHL6,FREAC2,LUN	forkhead box F2	Q12947	16	Nucleus	transcription regulator			2295	14238
FOXG1	2900064B05Rik,BF-1,BF1A,BF2,FHKL3,FKH2,FKHL1,FKHL2,FKHL3,FKHL4,Fkhr,FOXG1A,FOXG1B,FOXG1C,Foxo1,HBF-1,HBF-2,HBF-3,HBF-G2,Hfh9,Hfhbf1,HFK1,HFK2,HFK3,KHL2,QIN,RATBF1A	forkhead box G1	P55316	19	Nucleus	transcription regulator	Prognosis		2290	15228	24370
FOXJ3	C330039G02RIK,DKFZp761E2211,FHD6,KIAA1041,MGC165036,MGC176686,mKIAA1041	forkhead box J3	Q9UPW0	17	Nucleus	transcription regulator			22887	230700	313554
FOXL2	AU045128,BPES,BPES1,PFRK,PINTO,POF3	forkhead box L2	P58012	16	Nucleus	transcription regulator			668	26927	367152
FOXN4	FLJ35967	forkhead box N4	--		Nucleus	transcription regulator			121643	116810	288736
FSCN1	AI663989,FAN1,fascin,FASCIN1,FLJ38511,FLJ43305,HSN,p55,SNL	fascin homolog 1, actin-bundling protein (Strongylocentrotus purpuratus)	Q16658	1	Cytoplasm	other	Unspecified Application		6624	14086
FSH	FOLLICLE STIMULATING HORMONE,Follitropin	--	--	16	Plasma Membrane	complex
FUBP1	9530027K12Rik,D3ERTD330E,DNA helicase V,FBP,FBP1,FUBP,Fubp4	far upstream element (FUSE) binding protein 1	Q96AE4		Nucleus	transcription regulator			8880	51886	654496
FUS	ALS6,D430004D17Rik,D930039C12Rik,FUS1,Fusion,HNRNPP2,Pigpen,POMP75,TLS	fused in sarcoma	P35637	5	Nucleus	transcription regulator			2521	233908	317385
FXR ligand-FXR-Retinoic acid-RXRα	Bile acid-FXR-Retinoic acid-RXR&alphal;,Bile acid-FXR-retinoic acid-RXRα,FXR ligand-FXR-Retinoic acid-RXRalpha	--	--	9	Nucleus	complex
G protein	G protein alpha beta gamma,G protein alpha-G protein beta-G protein gamma,G protein alpha-G protein beta-GDP-G protein gamma,G-protein α-β-γ,Gpro,Guanine nucleotide binding protein,Gαi-Gβ-Gγ,Gαq-Gβ-Gγ	--	--	24	Cytoplasm	complex
G protein alpha	G-Protein Alpha Subunit,Gα	--	--	24	Cytoplasm	group
G protein alphai	G protein ai,G PROTEIN ALPHA I SUBUNITS,G-αi,Gi,GI ALPHA,Gn ALPHA,GNAI	--	--	24	Cytoplasm	group
G protein beta gamma	Gbetagamma,Gβγ	--	--	19	Cytoplasm	complex
G6PD	G28A,G6PD1,G6PDX,Glucose-6-P Dehydrogenase,Gpdx	glucose-6-phosphate dehydrogenase	P11413		Cytoplasm	enzyme			2539	14381	24377
GANAB	AU042638,G2AN,GLUII,Glycosyl Hydrolase Family 31,KIAA0088,MGC144011,MGC144012,mKIAA0088	glucosidase, alpha; neutral AB	Q14697		Cytoplasm	enzyme			23193	14376	293721
GAPDH	G3PD,G3PDH,GAPD,Glyceraldehyde-3-phosphate Dehydrogenase,LOC100048438,LOC685186,LOC686275,LOC689689,MGC102544,MGC102546,MGC103190,MGC103191,MGC105239,MGC127711,MGC88685,NUCLEAR URACIL DNA GLYCOSYLASE,OTTMUSG00000014946,RGD1565368	glyceraldehyde-3-phosphate dehydrogenase	P04406	16	Cytoplasm	enzyme	Diagnosis,Disease Progression,Unspecified Application		2597	100043349	500983|689689|24383|685186
GARS	CMT2D,DSMAV,Glycine--tRNA ligase,GLYCYL TRNA SYNTHETASE,GlyRS,GRS,HMN5,Nmf249,SGRP23,SMAD1	glycyl-tRNA synthetase	P41250		Cytoplasm	enzyme			2617	353172	297113
GART	Adenosine3,AIRS,FTRG,Gaps,GARFT,GARS,GARTF,MGC47764,PAIS,PGFT,PRGS	phosphoribosylglycinamide formyltransferase, phosphoribosylglycinamide synthetase, phosphoribosylaminoimidazole synthetase	P22102		Cytoplasm	enzyme	Prognosis,Safety	LY231514	2618	14450	288259
GATA1	ERYF1,GF-1,globin transcription factor 1,NFE1,XLTT	GATA binding protein 1 (globin transcription factor 1)	P15976	17	Nucleus	transcription regulator			2623	14460	25172
GATA4	ASD2,MGC126629	GATA binding protein 4	--		Nucleus	transcription regulator	Diagnosis,Disease Progression		2626	14463	54254
GATA6	AA410133	GATA binding protein 6	Q92908	17	Nucleus	transcription regulator	Diagnosis		2627	14465	29300
Gata		--	--	18	Nucleus	group
GATAD2A	1110066C11Rik,BC031407,C80248,FLJ20085,FLJ21017,MGC109147,MGC29315,MGC36975,P66ALPHA,RGD1310596	GATA zinc finger domain containing 2A	Q86YP4	9	Nucleus	transcription regulator			54815	234366	290669
GATAD2B	AL118180,C430014D17RIK,FLJ37346,KIAA1150,MGC138257,MGC138285,mKIAA1150,p66,P66BETA,RGD1308533,RP11-216N14.6	GATA zinc finger domain containing 2B	Q8WXI9	9	Nucleus	transcription regulator			57459	229542	310614
GC-GCR dimer		--	--	20	Nucleus	complex
GCM1	Gcm-rs2,Gcm1-rs1,GCMA,glide,hGCMa	glial cells missing homolog 1 (Drosophila)	Q9NP62	20	Nucleus	transcription regulator			8521	14531	29394
GFI1	AW495828,FLJ94509,Pal-1,SCN2,ZNF163	growth factor independent 1 transcription repressor	--		Nucleus	transcription regulator			2672	14581	24388
GHITM	1010001P14Rik,C77840,Clone 42,DERP2,DKFZp566C0746,FLJ26584,Growth hormone-inducible transmembrane,HSPC282,MGC94737,MICS1,My021,PTD010,TMBIM5	growth hormone inducible transmembrane protein	Q9H3K2		Cytoplasm	other	Unspecified Application		27069	66092	290596
Glucocorticoid-GCR		--	--	18	Nucleus	complex
GMPS	AA591640,AI047208,Guanine Monphosphate Synthetase	guanine monphosphate synthetase	P49915		Nucleus	enzyme			8833	229363	295088
GNAI1	AU046200,BPGTPB,G ALPHA I1,G PROTEIN ALPHA I1,GI,GI ALPHA1,Gi1 alpha-subunit,MGC128528	guanine nucleotide binding protein (G protein), alpha inhibiting activity polypeptide 1	P63096	24	Plasma Membrane	enzyme			2770	14677	25686
GNB2L1	Activated Protein Kinase C Receptor,AL033335,D4Mgi39,EPSILON RACK,GB-like,GNB2-RS1,GNB2L,Guanine Binding Protein beta2 Rs1,H12.3,HLC-7,p205,PIG21,RACK1	guanine nucleotide binding protein (G protein), beta polypeptide 2-like 1	P63244		Cytoplasm	enzyme			10399	14694	83427
GNL3	BC037996,C77032,E2IG3,MGC46970,MGC800,NNP47,NS,NUCLEOSTEMIN,NUG1	guanine nucleotide binding protein-like 3 (nucleolar)	--	25	Nucleus	other			26354	30877	290556
GOT	2-oxoglutarate-glutamate aminotransferase,AAT,aspartate alpha-ketoglutarate transaminase,ASPARTATE AMINOTRANSFERASE,Aspartate transaminase,aspartate-2-oxoglutarate transaminase,aspartate:2-oxoglutarate aminotransferase,aspartic acid aminotransferase,aspartic aminotransferase,aspartyl aminotransferase,AspT,AST,glutamate oxaloacetate transaminase,glutamate-oxalacetate aminotransferase,glutamate-oxa…	--	--	22	unknown	group	Efficacy,Prognosis,Safety,Unspecified Application
Gpd	alpha-glycerophosphate dehydrogenase,alpha-glycerophosphate dehydrogenase (acceptor),dehydrogenase, glycerol phosphate (acceptor),DL-glycerol 3-phosphate oxidase,FAD-dependent glycerol-3-phosphate dehydrogenase,FAD-dependent sn-glycerol-3-phosphate dehydrogenase,FAD-glycerophosphate dehydrogenase,FAD-linked glycerol 3-phosphate dehydrogenase,FAD-linked L-glycerol-3-phosphate dehydrogenase,flavin-…	--	--	1	Cytoplasm	group
GPI	AMF,DKFZp686C13233,G6PI,Glucose phosphate isomerase 1,Gnpda,GNPI,Gpi-1r,Gpi-1s,Gpi-1t,GPI1,MF,MGC113776,Neuroleukin,NK,NK/GPI,NLK,Org,PGI,PHI,Phosphoglucoisomerase,SA-36	glucose-6-phosphate isomerase	P06744	12	Extracellular Space	enzyme	Unspecified Application		2821	14751	292804
Gsk3	Glycogen synthase kinase,Glycogen synthase kinase 3,Gsk,GSK3 ALPHA/BETA	--	--	21	Cytoplasm	group
GSK3B	7330414F15Rik,8430431H08Rik,C86142,GSK-3,GSK-3BETA,GSK-3β,Gsk-beta,GSKβ,Tpk1	glycogen synthase kinase 3 beta	P49841	18	Nucleus	kinase	Diagnosis,Efficacy	enzastaurin	2932	56637	84027
GSR	AI325518,D8Ertd238e,GLUTATHIONE REDUCTASE,Gr,Gr-1,Gred,GRX,MGC78522	glutathione reductase	--	25	Cytoplasm	enzyme			2936	14782	116686
GST	Glutathione s-transferase,GSH Transferase	--	--	15	Nucleus	complex	Prognosis,Safety
GTF2H5	2700017P07Rik,2810432H05Rik,bA120J8.2,C6orf175,D17WSU155E,RGD1560991,TFB5,TFIIH,TGF2H5,TTD,TTD-A	general transcription factor IIH, polypeptide 5	--	19	Nucleus	other			404672	66467	502227
GTF2I	6030441I21RIK,BAP-135,BTKAP1,DIWS,ERSF,FLJ38776,FLJ56355,general transcription factor II,Gtf2ird1,GTFII-I,IB291,LOC732437,MGC94055,SPIN,TFII-I,WBS,WBSCR6	general transcription factor IIi	P78347	22	Nucleus	transcription regulator			2969	14886	353256
GTF3C3	AL022818,TF3C-gamma,TFIIIC102,TFIIIC2-102,TFIIICgamma	general transcription factor IIIC, polypeptide 3, 102kDa	Q9Y5Q9		Nucleus	transcription regulator			9330	98488	316810
GTPBP4	2610028C09Rik,CRFG,FLJ10686,FLJ10690,FLJ39774,Gtpbp3,LOC683324,NGB,NOG1	GTP binding protein 4	Q9BZE4		Nucleus	enzyme			23560	69237	114300
H+-transporting two-sector ATPase	ATP phosphohydrolase (H+-transporting),ATP synthase,bacterial Ca2+/Mg2+ ATPase,chloroplast ATPase,coupling factors (F0, F1 and CF1),F1-ATPase,FoF1-ATPase,H+-transporting ATPase,H+-transporting two-sector ATPase,mitochondrial ATPase	--	--	15	unknown	group
H2AF	H2A	--	--	8	unknown	group
H2AFY2	Histone macroH2A2,macroH2A2,MGC130227,MGC130228,RGD1561371	H2A histone family, member Y2	Q9P0M6	8	Nucleus	other			55506	404634	361844
H2AFY	H2A/y,H2AF12M,H2AFJ,HISTONE MACROH2A1.1,LOC100046770,macroH2A1,MACROH2A1.1,MACROH2A1.2,MGC105515,mH2A1	H2A histone family, member Y	O75367	8	Nucleus	other			9555	26914	29384
H2AFZ	H2A/z,H2AZ,MGC105426,MGC117173,MGC72814	H2A histone family, member Z	P0C0S5	8	Nucleus	other			3015	51788	58940
HADHA	C77020,ECHA,Enoyl-CoA Hydratase,GBP,HADH,LCEH,LCHAD,MGC105338,MGC1728,Mitochondrial long chain enoyl CoA hydratase,Mitochondrial trifunctional protein alpha,MTPA,RGD1560655,TP-ALPHA	hydroxyacyl-CoA dehydrogenase/3-ketoacyl-CoA thiolase/enoyl-CoA hydratase (trifunctional protein), alpha subunit	P40939	6	Cytoplasm	enzyme	Unspecified Application		3030	97212	170670
HAND1	bHLHa27,EHAND,Ehand1,HXT,MGC114332,Th1,Thing1	heart and neural crest derivatives expressed 1	O96004	17	Nucleus	transcription regulator			9421	15110	59112
Hat	HISTONE ACETYLASE,Histone acetyltransferase	--	--	13	Nucleus	complex
HBZ	AI450015,HBA-X,RGD1307486,ZETA GLOBIN	hemoglobin, zeta	P02008	12	Cytoplasm	transporter			3050	15126	287168
Hd-neuronal intranuclear inclusions		--	--	4	Nucleus	complex
HDAC1	DKFZp686H12203,EG15181,ENSMUSG00000061062,Gm1824,GON-10,HD1,HDAC,Hdac1-ps,HISTONE DEACETYLASE-1,MGC102534,MGC118085,MommeD5,RPD3,RPD3L1	histone deacetylase 1	Q13547	12	Nucleus	transcription regulator	Efficacy	tributyrin, belinostat, pyroxamide, MGCD0103, vorinostat, romidepsin	3065	433759	297893
HDAC4	4932408F19,4932408F19Rik,AHO3,AI047285,BDMR,HA6116,HD4,HDAC-A,KIAA0288	histone deacetylase 4	P56524	17	Nucleus	transcription regulator		tributyrin, belinostat, pyroxamide, vorinostat, romidepsin	9759	208727	363287
Hdac	Histone deacetyltransferase	--	--	17	Nucleus	group
Hdac1/2		--	--	8	Nucleus	group
HDGF	AI118077,D3Ertd299e,DKFZp686J1764,FLJ96580,HMG1L2,Transformation-related	hepatoma-derived growth factor	P51858	23	Extracellular Space	growth factor			3068	15191	114499
HDL	HDL particle,HDL Particles,high density lipoprotein	--	--	24	Plasma Membrane	complex
Hedgehog	Hh	--	--	17	Extracellular Space	group
hemoglobin	haemoglobin,Hb	--	--	12	unknown	complex	Diagnosis,Efficacy,Safety,Unspecified Application
Hexokinase	ATP-dependent hexokinase,ATP:D-hexose 6-phosphotransferase,glucose ATP phosphotransferase,hexokinase (phosphorylating),hexokinase D,hexokinase type IV,hexokinase type IV glucokinase	--	--	10	unknown	group
HIC1	AA408311,ZBTB29,ZNF901	hypermethylated in cancer 1	Q14526		Nucleus	transcription regulator	Diagnosis		3090	15248	303310
HIF1A	AA959795,bHLHe78,HIF-1ALPHA,HIF-1α,HIF-1α (hydroxylated),HIF1,Hypoxia inducible factor 1 alpha subunit,MOP1,PASD8	hypoxia inducible factor 1, alpha subunit (basic helix-loop-helix transcription factor)	Q16665	16	Nucleus	transcription regulator	Diagnosis,Efficacy,Prognosis,Response to Therapy		3091	15251	29560
HIF3A	bHLHe17,HIF-3A4,IPAS,MOP7,NEPAS,PASD7	hypoxia inducible factor 3, alpha subunit	--		Nucleus	transcription regulator			64344	53417	64345
HIPK2	1110014O20RIK,B230339E18RIK,DKFZp686K02111,FLJ23711,LOC100505582,LOC653052,PRO0593,Stank	homeodomain interacting protein kinase 2	Q9H2X6	13	Nucleus	kinase			28996	15258	362342
HIST1H1B	H1,H1.5,H1B,H1F5,H1s-3,LOC682425,MGC126630,MGC126632	histone cluster 1, H1b	P16401	24	Nucleus	other			3009	56702	680522
HIST1H1C	0610008C09Rik,H1.2,H1C,H1F2,H1var1,His1a,Histone h1, member 2,Histone h1.2,MGC107646,MGC3992	histone cluster 1, H1c	P16403	24	Nucleus	other			3006	50708
HIST1H1D	H1.3,H1D,H1F3,H1s-4,H1t,MGC138176	histone cluster 1, H1d	P16402	24	Nucleus	other			3007	14957
HIST3H2A	H2a,MGC116285,MGC3165	histone cluster 3, H2a	Q7L7L0	4	Nucleus	other			92815	319162	64646
HISTONE	HISTONES	--	--	4	Nucleus	group
Histone H1		--	--	14	Nucleus	group
Histone h4	H4,HIST4	--	--	17	Nucleus	group
HIVEP2	MBP-2,MIBP1,Myc intron binding protein 1,Schnurri-2,SHN2,ZAS2,ZNF40B	human immunodeficiency virus type I enhancer binding protein 2	--		Nucleus	transcription regulator			3097	15273	29721
HK1	BB404130,dea,HEXOKIN,HEXOKINASE 1,Hk1-s,HK1-ta,HK1-tb,HK1-tc,HKI,HXK1,mHk1-s	hexokinase 1	P19367	10	Cytoplasm	kinase			3098	15275	25058
HK2	AI642394,DKFZp686M1669,HEXOKINASE 2,Hexokinase ii,HKII,HXK2,TYPE II HEXOKINASE	hexokinase 2	P52789	10	Cytoplasm	kinase	Prognosis		3099	15277	25059
HM13	1200006O09Rik,4930443L17Rik,5031424B04Rik,AV020344,dJ324O17.1,H13,IMP1,IMPAS,IMPAS-1,MSTP086,PSENL3,PSL3,SPP	histocompatibility (minor) 13	Q8TCT9		Cytoplasm	peptidase			81502	14950	311545
HMBS	hemC,MGC108753,PBG-D,PORC,PORPHOBILINOGEN DEAMINASE,T25658,UPS,URO-S,Uros1	hydroxymethylbilane synthase	P08397	12	Cytoplasm	enzyme			3145	15288	25709
HMG CoA synthase	(S)-3-hydroxy-3-methylglutaryl-CoA acetoacetyl-CoA-lyase (CoA-acetylating),3-hydroxy-3-methylglutaryl CoA synthetase,3-Hydroxy-3-methylglutaryl coenzyme A synthase,3-hydroxy-3-methylglutaryl coenzyme A synthetase,3-hydroxy-3-methylglutaryl-CoA synthase,acetoacetyl coenzyme A transacetase,acetyl-CoA:acetoacetyl-CoA C-acetyltransferase (thioester-hydrolysing, carboxymethyl-forming),b-hydroxy-b-meth…	--	--	13	Nucleus	group
HMGA1	AL023995,HMG(I)Y,HMG-I(Y),HMG-R,Hmg-y/i,HMG1(Y),Hmgi,Hmgi/y,HMGIY,HMGY,MGC102580,MGC12816,MGC4242,MGC4854	high mobility group AT-hook 1	--		Nucleus	transcription regulator	Unspecified Application		3159	15361	117062
HMGN5	GARP45,LOC680182,LOC682212,MGC103386,MGC187664,NBP-45,NSBP1	high mobility group nucleosome binding domain 5	P82970		Nucleus	transcription regulator			79366	50887	680182|681284
HNF1B	AI385728,AI987804,Eukaryotic transcription factor 2,FJHN,HNF1BETA,HNF1β,HNF2,Homeoprotein LFB3,HPC11,LF-B3,MGC93549,MODY5,TCF2,VHNF1	HNF1 homeobox B	--		Nucleus	transcription regulator			6928	21410	25640
HNF4α dimer	HNF4 dimer,HNF4&alpha dimer,HNF4alpha dimer	--	--	21	Nucleus	complex
HNRNPA1	A1,D15Ertd119e,HDP,HETEROGENOUS NUCLEAR RIBONUCLEOPROTEIN A1,HNRNP-A,HNRPA1,HNRPA1L3,MGC102127,MGC102128,MGC102835,MGC103392,VDRE-BP1	heterogeneous nuclear ribonucleoprotein A1	P09651	2	Nucleus	other			3178	15382
HNRNPA3	2410013L13Rik,2610209F03Rik,2610510D13RIK,D10S102,FBRNP,HNRPA3,MGC101940,MGC138232,MGC142030,MGC37309	heterogeneous nuclear ribonucleoprotein A3	P51991	9	Nucleus	other			220988	229279	362152
HNRNPA2B1	9130414A06Rik,DKFZp779B0244,FLJ22720,hnRNP,hnRNP A,HNRNP A2,HNRNP B1,HNRNPA2/B1,HNRPA2,HNRPA2B1,Hnrpa2b1 (predicted),HNRPB1,RNPA2,SNRPB1,VDRE-BP2	heterogeneous nuclear ribonucleoprotein A2/B1	P22626	16	Nucleus	other			3181	53379	362361
HNRNPC	AL022939,C1,C2,D14Wsu171e,Heterogeneous nuclear ribonucleoprotein C,HNRNP,Hnrnp C1/C2,HNRNPC1,hnRNPC2,HNRPC,Hnrpc1,Hnrpc2,MGC104306,MGC105117,MGC114359,MGC117353,MGC131677,REBIP,SNRPC	heterogeneous nuclear ribonucleoprotein C (C1/C2)	P07910	6	Nucleus	other			3183	15381	290046
HNRNPD	AUF1,AUF1A,C230004L04,HNRNP D0,HnRNP UP2,HNRPD,P37	heterogeneous nuclear ribonucleoprotein D (AU-rich element RNA binding protein 1, 37kDa)	Q14103	21	Nucleus	transcription regulator			3184	11991	79256
HNRNPF	4833420I20RIK,AA407306,HnRNP F/H,HNRPF,mcs94-1,MGC101981,MGC110997,MGC125106,MGC36971,OK/SW-cl.23,Ribonucleoprotein F	heterogeneous nuclear ribonucleoprotein F	P52597	23	Nucleus	other			3185	98758	64200
HNRNPK	CSBP,FLJ41122,HNRPK,KBBP,MGC102032,NOVA,TUNP	heterogeneous nuclear ribonucleoprotein K	P61978	21	Nucleus	other	Prognosis		3190	15387	117282
HNRNPL	C79783,D830027H13Rik,FLJ35509,HNRPL,L-protein,P/OKcl.14,Ribonucleoprotein l	heterogeneous nuclear ribonucleoprotein L	P14866	21	Nucleus	other			3191	15388	80846
HNRNPU	AA408410,AI256620,AL024194,AL024437,AW557595,C86794,HNRPU,HRNPU,SAF-A,scaffold attachment factor A,SN1,Sp120,U21.1	heterogeneous nuclear ribonucleoprotein U (scaffold attachment factor A)	Q00839	5	Nucleus	transporter	Unspecified Application		3192	51810	117280
HNRNPUL1	E130317O14RIK,E1B-55kDa-associated,E1B-55KDA-ASSOCIATED PROTEIN 5,E1B-AP5,FLJ12944,Hnrnpul,HNRPUL1,MGC36621,MGC78330	heterogeneous nuclear ribonucleoprotein U-like 1	Q9BUJ2	2	Nucleus	other			11100	232989	361522
HNRPDL	AA407431,AA959857,D5Ertd650e,D5Wsu145e,HNRNP,HNRNP-D LIKE,hnRNP-DL,JKTBP,JKTBP1,JKTBP2,laAUF1,MGC125262	heterogeneous nuclear ribonucleoprotein D-like	O14979	8	Nucleus	other	Unspecified Application		9987	50926	305178
Holo RNA polymerase II	Holo-pol	--	--	19	unknown	complex
HOXA9	ABD-B,D6a9,HOX1,HOX1.7,HOX1G,Hox1r5,Hoxa7,MGC1934	homeobox A9	P31269	3	Nucleus	transcription regulator	Diagnosis		3205	15405	500126
HSD17B11	17-beta-hydroxysteroid dehydrogenase 11,17beta hsd11,17BETA HSDXI,17BHSD11,DHRS8,LOC51170,MGC93725,PAN1B,RETSDR2,SDR16C2,SDR2	hydroxysteroid (17-beta) dehydrogenase 11	--	23	Cytoplasm	enzyme			51170	114664	289456
HSD17B12	17-Beta hydroxysteroid dehydrogenase 12,2610510O05Rik,AI172963,KAR,KIK-I,Kik1,LOC84013,SDR12C1	hydroxysteroid (17-beta) dehydrogenase 12	Q53GQ0	9	Cytoplasm	enzyme			51144	56348	84013
HSF2	AI661205,HSTF 2,MGC117376,MGC156196,MGC75048	heat shock transcription factor 2	Q03933	13	Nucleus	transcription regulator			3298	15500	64441
HSF4	CTM,Hsf4 predicted,HSTF 4,ldis1,mHSF4	heat shock transcription factor 4	Q9ULV5	1	Nucleus	transcription regulator			3299	26386	291960
HSF1 (includes EG:15499)	AA960185,Chx1,Heat shock transcription factor 1,Hsf,HSTF1,LOC642255	heat shock transcription factor 1	Q00613	11,25	Nucleus	transcription regulator			3297	15499	79245
Hsp70	Hsp70gene	--	--	13	Cytoplasm	group	Unspecified Application
Hsp90	HSC90,Hsp84,Hspcb	--	--	9	Cytoplasm	group
HSP	Ancillary,Ancillary protein,HEAT SHOCK,HEAT SHOCK PROTEIN	--	--	15	Cytoplasm	group
HSP90AA1	AL024080,AL024147,FLJ31884,Heat shock protein 1, alpha,hsp4,HSP86,Hsp86-1,HSP89,Hsp89-alpha-delta-N,HSP89A,Hsp90,HSP90 ALPHA,HSP90A,HSP90N,HSPC1,HSPCA,HSPCAL1,HSPCAL4,HSPN,LAP2,MGC105293	heat shock protein 90kDa alpha (cytosolic), class A member 1	P07900	7	Cytoplasm	enzyme	Safety,Unspecified Application	17-dimethylaminoethylamino-17-demethoxygeldanamycin, IPI-504, cisplatin	3320	15519	299331
HSP90AB1	AL022974,C81438,D6S182,FLJ26984,Hsp1beta,HSP84,Hsp84-1,HSP90,Hsp90 alpha,HSP90-BETA,HSP90B,HSPC2,HSPCB,LOC100505819,MGC115780,MGC94263	heat shock protein 90kDa alpha (cytosolic), class B member 1	P08238	7	Cytoplasm	enzyme		17-dimethylaminoethylamino-17-demethoxygeldanamycin, IPI-504, cisplatin	3326	15516	301252
HSP90B1	ECGP,ENDOPLASMIN,ERP99,FLJ22209,GP96,GRP94,HSP GP96 PRECURSOR,HSP96,TA-3,TARG2,TRA1	heat shock protein 90kDa beta (Grp94), member 1	P14625	18	Cytoplasm	other		17-dimethylaminoethylamino-17-demethoxygeldanamycin, IPI-504, cisplatin	7184	22027	362862
HSPA4	AI317151,APG-2,HS24/P52,HSP110,HSP70,Hsp70RY,HSPH2,irp94,KIAA4025,MGC131852,mKIAA4025,RY	heat shock 70kDa protein 4	P34932	7	Cytoplasm	other	Efficacy		3308	15525	266759
HSPA5	AL022860,AU019543,BIP,D2Wsu141e,D2Wsu17e,FLJ26106,GRP78,HEAT SHOCK 70KDA PROTEIN5,Hsce70,HSP70-5,IDBP2,Immunoglobulin heavy chain binding,mBiP,MIF2,SEZ-7	heat shock 70kDa protein 5 (glucose-regulated protein, 78kDa)	P11021	11	Cytoplasm	enzyme	Unspecified Application		3309	14828	25617
HSPA8	2410008N15Rik,HEAT SHOCK COGNATE 71-KDA,HEAT SHOCK PROTEIN 8,HS7C,HSC54,HSC70,HSC71,HSC73,Hsp 8,HSP/C70,HSP70,HSP71,HSP73,HSPA10,IDBP1,LAP1,LOC624853,MGC102007,MGC106514,MGC114311,MGC118485,MGC128130,MGC131511,MGC29929,NIP71	heat shock 70kDa protein 8	P11142	7	Cytoplasm	enzyme	Diagnosis		3312	15481	24468
HSPA9	CSA,GRP-75,Hsc74,Hsp74,Hsp74a,Hspa9a,HSPA9B,IDBP-3,MGC4500,Mitochondrial stress-70,Mortalin,MOT,Mot1,MOT2,Mthsp70,MTHSP75,PBP74,Stress-70	heat shock 70kDa protein 9 (mortalin)	P38646	13	Cytoplasm	other			3313	15526	291671
HSPB1	ACTIN POLYMERIZATION INHIBITOR,CMT2F,DKFZp586P1322,heat shock protein 1,Heat shock protein 1 beta,HMN2B,HS.76067,Hsb1,HSP25,HSP27,HSP28,SRP27	heat shock 27kDa protein 1	--	25	Cytoplasm	other	Diagnosis		3315	15507	24471
HSPB2	2810021G24Rik,Hs.78846,HSP27,LOH11CR1K,MGC133245,MKBP	heat shock 27kDa protein 2	--	25	Cytoplasm	other			3316	69253	161476
HSPD1	CPN60,GROEL,HLD4,HSP60,HSP65,Hspd1-30p,HuCHA60,MITO-P60,SPG13	heat shock 60kDa protein 1 (chaperonin)	P10809	11	Cytoplasm	enzyme			3329	15510	63868
HSPH1	AI790491,DKFZp686M05240,Heat shock protein 105 kda,hsp-E7I,HSP105,HSP105A,HSP105B,HSP110,KIAA0201,NY-CO-25	heat shock 105kDa/110kDa protein 1	Q92598	25	Cytoplasm	other			10808	15505	288444
HTT	AI256365,C430023I11RIK,HD,HD fragment,HD misfolded,HD NH2-terminal fragment aggregates,HDH,HUNTINGTIN,IT15,LOC100503657	huntingtin	P42858	6	Cytoplasm	transcription regulator	Unspecified Application		3064	15194	29424
IARS	2510016L12RIK,AI327140,AU044614,E430001P04RIK,FLJ20736,IARS1,Iarsl,ILE TRNA SYNTHASE,ILERS,ILRS,IRS,ISOLEUCYL TRNA SYNTHETASE,PRO0785	isoleucyl-tRNA synthetase	P41252		Cytoplasm	enzyme			3376	105148	306804
Ifn	INTERFERON	--	--	22	Nucleus	group
IFN alpha/beta	Ifn type i,IFN-I,IFNα/β,IFNα/β late,Interferon alpha/beta	--	--	22	Extracellular Space	group
IFN Beta	IFNb,IFNβ,INF BETA,Interferon beta	--	--	22	Nucleus	group
IFN TYPE 1	IFN type I,type I IFN,type1 Interferon	--	--	22	unknown	group
IFT172	4930553F24Rik,DKFZp434A163,KIAA1179,osm-1,SLB,WIM	intraflagellar transport 172 homolog (Chlamydomonas)	Q9UG01		Nucleus	other			26160	67661	116475
IGF1R	A330103N21RIK,CD221,D930020L01,hyft,IGF-IR,IGF1 RECEPTOR,Igf1r beta,Igf1r beta isoform,IGFIRC,IGFR,IGFR1,JTK13,LOC51049,MGC142170,MGC142172,MGC18216,NM1	insulin-like growth factor 1 receptor	P08069	19	Plasma Membrane	transmembrane receptor	Diagnosis,Efficacy,Prognosis,Response to Therapy	OSI-906, cixutumumab, IGF1	3480	16001	25718
IGF2BP1	AL024068,AW549074,CRD-BP,D030026A21Rik,D11Moh40e,D11Moh45,IMP-1,LOC201194,Neilsen,VICKZ1,ZBP1	insulin-like growth factor 2 mRNA binding protein 1	Q9NZI8	17	Cytoplasm	translation regulator			10642	140486	303477
IGF2BP3	2610101N11Rik,AA522010,Ab2-255,AL022933,AU045931,CT98,DKFZp686F1078,IMP-3,KOC1,Koc13,MGC61294,mimp3,Neilsen,RGD1306512,VICKZ3	insulin-like growth factor 2 mRNA binding protein 3	O00425	10	Cytoplasm	translation regulator	Diagnosis		10643	140488	312320
IgG	Auto IgG,CARIMUNE,Gamimune-N,Gamma globulin,Immunoglobulin G,immunoglobulins, G,POLYGAM	--	--	3	Plasma Membrane	complex	Efficacy,Prognosis
IgG2b		--	--	11	unknown	complex	Unspecified Application
Igh	IG H CHAIN,Ig heavy chain,IGG,IgG Heavy Chain,Immunoglobin Heavy Chain,Immunoglobulin Heavy Chain	--	--	3	unknown	group
Ikb	I KAPPA B,IκB	--	--	18	Cytoplasm	group
IKBKAP	3110040G09Rik,6030413P05,C78473,DKFZp781H1425,DYS,ELP1,FD,FLJ12497,IKAP,IKI3,Ikkap1,TOT1	inhibitor of kappa light polypeptide gene enhancer in B-cells, kinase complex-associated protein	O95163	1	Cytoplasm	other			8518	230233	140934
IKBKE	AW558201,IKB EPSILON,IkBe,IKK EPSILON,IKK-E,IKK-I,IKKε,Inhibitor of kappa b kinase epsilon,KIAA0151,MGC125294,MGC125295,MGC125297	inhibitor of kappa light polypeptide gene enhancer in B-cells, kinase epsilon	Q14164	22	Cytoplasm	kinase			9641	56489	363984
IKBKG	1110037D23Rik,AI848108,AI851264,AMCBX1,AW124339,FIP-3,Fip3p,I Kappa B Gamma,IKB GAMMA,IKK-GAMMA,IKKAP1,IKKG,IKK[g],IKKγ,IP,IP1,IP2,IPD2,NEMO,NEMO RELATED	inhibitor of kappa light polypeptide gene enhancer in B-cells, kinase gamma	Q9Y6K9	18	Nucleus	kinase			8517	16151	309295
IKK (complex)	IKKALPHABETA	--	--	18	Cytoplasm	complex
Ikk (family)		--	--	18	Cytoplasm	group
IL1	Interleukin 1	--	--	12	Extracellular Space	group	Efficacy,Prognosis
IL23	interleukin 23	--	--	22	Extracellular Space	complex
IL-2R	Il2 Receptor	--	--	12	Plasma Membrane	complex
ILF2	6230405A16Rik,MGC8391,NF-AT NF45,NF45,PRO3063,TEG-267,Tex261,TEX267	interleukin enhancer binding factor 2, 45kDa	Q12905	20	Nucleus	transcription regulator			3608	67781
ILF3	CBTF,DRBF,DRBP76,Interleukin binding factor 3,Interleukin enhancer binding factor 3,MMP4,MPHOSPH4,MPP4,NF-AT-90,NF110,NF110b,NF90,NF90a,NF90b,NFAR,NFAR-1,TCP110,TCP80	interleukin enhancer binding factor 3, 90kDa	Q12906	20	Nucleus	transcription regulator			3609	16201	84472
IMPDH2	ENSMUSG00000071041,Gm15210,Imp dehydrogenase 2,IMPD,IMPD2,Impdh,IMPDH-II,inosine 5'-phosphate dehydrogenase 2,MGC72938,OTTMUSG00000019498	IMP (inosine 5'-monophosphate) dehydrogenase 2	P12268		Cytoplasm	enzyme		thioguanine, VX-944, interferon alfa-2b/ribavirin, mycophenolic acid, ribavirin	3615	100042069|23918	301005
Importin alpha	Importin α,Karyopherin alpha	--	--	2	Nucleus	group
INHA	AW555078,INHIBIN A,Inhibin Alpha,MGC93593	inhibin, alpha	--	23	Extracellular Space	growth factor	Efficacy		3623	16322	24504
Integrin	Integrin protein(s),Integrin α-β,integrin-extracellular matrix	--	--	19	Plasma Membrane	complex
Interferon alpha	Ifn alpha,IFN-α,IFNA,Ifnalpha A	--	--	22	Extracellular Space	group	Unspecified Application
IPO9	0710008K06Rik,AI845704,C78347,DKFZp761M1547,FLJ10402,Imp9,KIAA1192,mKIAA1192,Ranbp9	importin 9	Q96P70	18	Nucleus	transporter			55705	226432	304817
IRF2	9830146E22Rik,AI646973,DKFZp686F0244,HiNF-M,MGC117893	interferon regulatory factor 2	P14316	22	Nucleus	transcription regulator			3660	16363	290749
IRF	Interferon Regulatory Factor,IRF FAMILY	--	--	22	unknown	group
IRF1 (includes EG:16362)	AU020929,IFN REGULATORY FACTOR 1,ISGF2,LSIR,MAR	interferon regulatory factor 1	P10914	22	Nucleus	transcription regulator	Prognosis		3659	16362	24508
IRG	INTERFERON INDUCIBLE GTPASE,p47 GTPASE	--	--	22	unknown	group
ITPR3	FLJ36205,INSP3R3,IP3R,IP3R3,IP3R3X	inositol 1,4,5-trisphosphate receptor, type 3	Q14573	18	Cytoplasm	ion channel			3710	16440	25679
ITPR	Inositol 1,4,5-triphosphate receptor,Inositol Triphosphate Receptor,Insp3 receptor,INSP3R,IP3 Receptor,IP3R	--	--	11	Cytoplasm	group
JAK	Jak Kinase	--	--	22	Cytoplasm	group
JDP2	JUNDM2,JUNDP2,TIF	Jun dimerization protein 2	--		Nucleus	transcription regulator			122953	81703	116674
Jnk	Jnk p54,Jnk p56,Jnk/Sapk,JUN KINASE,p40,p47,Sapk/Jnk	--	--	21	Cytoplasm	group
Jnk dimer		--	--	21	Nucleus	complex
JUN	Activator protein 1,AP-1,API-1,c-Fos,C-JUN,JUNC,LOC100288387,LOC100291417,LOC100293034,v-Jun,V-jun Avian Sarcoma Virus 17 Oncogene Homolog,V-jun Sarcoma Virus 17 Oncogene Homolog	jun proto-oncogene	P05412	14	Nucleus	transcription regulator	Diagnosis,Prognosis		3725	16476	24516
JUN/JUNB/JUND	AP-1,JUN,Jun dim	--	--	21	Nucleus	group
JUP	ARVD12,CTNN γ,CTNNG,D930025P04Rik,DP3,DPIII,GAMMA-CATENIN,PDGB,PG,PKGB,PLAKOGLOBIN	junction plakoglobin	P14923	1	Plasma Membrane	other	Diagnosis		3728	16480	81679
KARS	AA589550,AL024334,AL033315,AL033367,CMTRIB,D8Ertd698e,D8Wsu108e,KARS2,KIAA0070,KRS,LYSRS,MGC94484,mKIAA0070	lysyl-tRNA synthetase	Q15046		Cytoplasm	enzyme			3735	85305	292028
KAT5	AI839539,CPLA2,ESA1,HTATIP,HTATIP1,MGC117972,MGC95167,PLIP,TIP,Tip55,TIP60	K(lysine) acetyltransferase 5	Q92993	22	Nucleus	transcription regulator			10524	81601	192218
KCNA5	ATFB7,HCK1,HK2,HPCN1,Kv1,KV1.5,KV1.5 ALPHA SUBUNIT,MGC117058,MGC117059,MGC25248,PCN1	potassium voltage-gated channel, shaker-related subfamily, member 5	P22460		Plasma Membrane	ion channel		nicorandil, amiodarone, flecainide, quinidine	3741	16493	25470
KDM2B	CXXC2,E430001G17,F-box protein FBL10,Fbl10,FBXL10,JEMMA,JHDM1B,KIAA3014,mKIAA3014,NDY1,PCCX2	lysine (K)-specific demethylase 2B	Q8NHM5	4	Nucleus	other			84678	30841	304495
KDM5A	AA409370,C76986,JARID1A,MGC11659,RBBP-2,RBP2	lysine (K)-specific demethylase 5A	P29375	5	Nucleus	transcription regulator			5927	214899
KHDRBS1	FLJ34027,GAP-A P62,Khdrbs,Khsnpdl,LOC100046073,p60,P62,p62 Gap Associated,p62 Yes,p68,p68sam,SAM68	KH domain containing, RNA binding, signal transduction associated 1	Q07666	18	Nucleus	transcription regulator			10657	20218	117268
KHSRP	6330409F21Rik,FBP2,FUBP2,KSRP,MARTA1,MGC99676	KH-type splicing regulatory protein	Q92945	3	Nucleus	enzyme			8570	16549	171137
KITLG	C-KIT LIGAND,Clo,CON,contrasted,DKFZp686F2250,FPH2,Gb,KIT LIGAND,KITL,Kl,KL-1,Mast cell factor,MGF,SCF,SCF RECEPTOR LIGAND,Scf164,SF,SHEP7,SL,SLF,STEEL,STEEL FACTOR,Stem cell factor	KIT ligand	--	23	Extracellular Space	growth factor	Diagnosis,Efficacy,Unspecified Application		4254	17311	60427
KLF2	LKLF	Kruppel-like factor 2 (lung)	--		Nucleus	transcription regulator			10365	16598	306330
KLF3	9930027G08RIK,AL024007,BKLF,MGC151315,MGC48279,TEF2	Kruppel-like factor 3 (basic)	P57682	1	Nucleus	transcription regulator			51274	16599	114845
KLF5	4930520J07Rik,BTEB2,CKLF,IKLF,Kruppel-like factor 5,mBTEB2	Kruppel-like factor 5 (intestinal)	--		Nucleus	transcription regulator			688	12224	84410
KLF8	A830097P10RIK,BKLF3,DKFZp686O08126,MGC138314,RGD1565831,ZNF74,ZNF741	Kruppel-like factor 8	O95600		Nucleus	other			11279	245671	302582
KLF13	0610043C13Rik,9430029L20RIK,BTEB3,FKLF-2,NSLP1,RFLAT-1,RGD1565099	Kruppel-like factor 13	--	23	Nucleus	transcription regulator			51621	50794	499171
KPNB1	AA409963,IMB1,IMPNB,IMPORTIN 90,IMPORTIN BETA,Importin Beta 1,IPO1,IPOB,KAP BETA1,KARYOPHERIN BETA 1,MGC2155,MGC2156,MGC2157,MGC8315,NTF97,Nuclear factor P97,p97,Ptac97	karyopherin (importin) beta 1	Q14974	2	Nucleus	transporter			3837	16211	24917
KRT1	CK1,EHK,EHK1,EPPK,K1,Kb1,KERATIN 1,Keratin 2-1,Keratin complex 2 basic gene 1,KERATIN, 67K TYPE II CYTOSKELETAL,Krt-2.1,KRT1A,KRT2-1,Krt86,NEPPK	keratin 1	P04264	1	Cytoplasm	other	Diagnosis,Disease Progression		3848	16678	300250
KRT2	BB005427,CK-2e,CK2,K2E,Kb2,Keratin 2e,KRT2-17,Krt2-2,KRT2A,KRT2E,KRTE,MGC116967,MGC116968	keratin 2	P35908	1	Cytoplasm	other			3849	16681	406228
KRT5	3300001P10Rik,AW146334,CK5,Cytokeratin 5,DDD,EBS2,K5,KERATIN 5,Krt2-5,KRT5A,Sak57,Tfip8	keratin 5	P13647	1	Cytoplasm	other	Diagnosis,Efficacy,Unspecified Application		3852	110308	369017
KRT7	CK7,CYTOKERATIN 7,D15Wsu77e,K2C7,K7,KERATIN 7,Keratin complex 2, basic, gene 7,KRT2-7,KRT7 TYPE II,MGC11625,MGC129731,MGC3625,SARCOLECTIN,SCL	keratin 7	P08729	1	Cytoplasm	other			3855	110310	300242
KRT8	AA960620,AL022697,AU019895,CARD2,Ck A,CK8,CYK8,CYKER,CYTOKERATIN 8,Ecp,EndoA,K2C8,K8,Ker8,KERATIN 8,Keratin complex 2, basic, gene 8,KO,Krt-2.8,KRT2-8,MGC118110,Troma-1	keratin 8	P05787	1	Cytoplasm	other	Prognosis		3856	16691	25626
KRT9	CK-9,EPPK,K9,KRT1-9	keratin 9	P35527	1	Cytoplasm	other	Diagnosis		3857	107656	266717
KRT10	BCIE,BIE,CK10,CYTOKERATIN 10,D130054E02RIK,EHK,K10,K1C1,Ka10,Ker59,Keratin 1-10,KERATIN 10,KPP,Krt-1.10,KRT1-10	keratin 10	P13645	1	Cytoplasm	other			3858	16661	450225
KRT13	CK13,K13,Ka13,Ker47,Keratin 13,Keratin complex 1, acidic, gene 13,Krt-1.13,KRT1-13,MGC161462,MGC3781	keratin 13	P13646	1	Cytoplasm	other			3860	16663	287699
KRT14	50KDA TYPE I EPIDERMAL KERATIN,AI626930,CK14,Cytokeratin 14,EBS3,EBS4,K14,Ka14,Keratin 1-14,KERATIN 14,Krt-1.14,KRT1-14,NFJ	keratin 14	P02533	1	Cytoplasm	other	Unspecified Application		3861	16664	287701
KRT17	CK17,K17,Ka17,KERATIN 17,KRT1-17,PC,PC2,PCHC1	keratin 17	Q04695	1	Cytoplasm	other	Diagnosis,Efficacy		3872	16667	287702
KRT79	BC031593,FLJ26646,K6L,KRT6L,MGC36907	keratin 79	Q5XKE5	23	unknown	other			338785	223917
KRT84	AV235125,HB4,HRb-1,Kb24,KRT2-16,Krt2-3,KRTHB4,MGC140837	keratin 84	Q9NSB2		Cytoplasm	other			3890	16680	315320
KRT6A	2310016L08Rik,BB144589,CK6A,CK6C,CK6D,Cytokeratin 6C,K6,K6A,K6alpha,K6B,K6beta,K6C,K6D,KERATIN 6A,Keratin6,KRT2-6A,KRT2-6B,Krt2-6c,Krt6,Krt6b,KRT6C,KRT6D,MGC141272,MK6a,Mk6b,mK6[a],mK6[b]	keratin 6A	P02538	1	Plasma Membrane	other	Diagnosis		3853	16687|16688
KTN1	CG1,KIAA0004,KINECTIN,KNT,MGC133337,MU-RMS-40.19	kinectin 1 (kinesin receptor)	Q86UP2		Cytoplasm	other			3895	16709	361029
Lamin b		--	--	2	Nucleus	group
Laminin	Lam,Laminin-111,LN	--	--	16	Extracellular Space	complex
LARS	2310045K21Rik,3110009L02Rik,AW536573,FLJ10595,FLJ21788,hr025Cl,HSPC192,KIAA1352,LARS1,LEURS,LEUS,LRS,MGC105585,mKIAA1352,PIG44,RNTLS	leucyl-tRNA synthetase	Q9P2J5		Cytoplasm	enzyme			51520	107045	291624
LBR (includes EG:368360)	AI505894,C1orf197,DHCR14B,FLJ43126,ic,LMN2R,MGC9041,Nbp60,PHA	lamin B receptor	Q14739	2	Nucleus	enzyme			3930	98386	89789
LDHA	GSD11,I lactate dehydrogenase (m chain),l7R2,lactate dehydrogenase 1 A chain,Lactate dehydrogenase 5,Lactate dehydrogenase a,LACTATE DEHYDROGENASE M4,LDH muscle subunit,LDH-M,LDH1,LDH5,M-Ldh,PIG19,RGD1562690	lactate dehydrogenase A	P00338	3	Cytoplasm	enzyme	Diagnosis,Disease Progression,Efficacy,Prognosis,Unspecified Application		3939	16828	500965|24533
LDHB	-lactate dehydrogenase h-chain,AI790582,H-Ldh,L-lactate dehydrogenase B chain,LDH heart subunit,LDH-H,LDH2,LDHBD,TRG-5	lactate dehydrogenase B	P07195	3	Cytoplasm	enzyme	Unspecified Application		3945	16832	24534
LDL	Beta Lipoprotein,Low density lipoprotein,Oxidised LDL	--	--	25	Plasma Membrane	complex	Efficacy,Unspecified Application
LECT1	BRICD3,CHM-I,CHM1,MGC156632,MYETS1	leukocyte cell derived chemotaxin 1	O75829		Extracellular Space	other			11061	16840	81512
LEMD2	BC026588,dJ482C21.1,Lem2,MGC112806,MGC37253,NET25	LEM domain containing 2	Q8NC56		Nucleus	other			221496	224640	361807
LEMD3	AI316861,MAN1,Msrb3,RGD1561001	LEM domain containing 3	Q9Y2U8	19	Nucleus	other			23592	380664	680066
LETM1	MGC94466	leucine zipper-EF-hand containing transmembrane protein 1	O95202		Cytoplasm	other			3954	56384	305457
Lh	LUTEINIZING HORMONE	--	--	16	Plasma Membrane	complex
LMNA	CDCD1,CDDC,CMD1A,CMT2B1,Dhe,EMD2,FPL,FPLD,FPLD2,HGPS,IDC,LAMIN A,LAMIN A/C,Lamin C2,LAMININ A/C,LDP1,LFP,LGMD1B,Lmn,LMN1,LMNC,LMNL1,PRO1	lamin A/C	P02545	2	Nucleus	other			4000	16905	60374
LMNB1	ADLD,LAMIN,LAMIN B,LAMIN B1,LMN,LMN2,LMNB,MGC111419	lamin B1	P20700	2	Nucleus	other			4001	16906	116685
LMNB2	LAMB2,LAMIN B2,Lamin B3,LMN2,MGC2721,RGD1563803	lamin B2	Q03252	2	Nucleus	other			84823	16907	299625
LPCAT1	2900035H07Rik,AYTL2,BB137372,BC005662,C87117,FLJ12443,FLJ41609,LOC100128216,LPCAT,MGC8148,PFAAP3,rd11,RGD1311599	lysophosphatidylcholine acyltransferase 1	Q8NF37	19	Cytoplasm	enzyme			79888	210992	361467
LPCAT2	1-Acylglycerophosphocholine O-acyltransferase,A330042H22,AYTL1,Aytl1a,DKFZp686H22112,FLJ20481,lpafat1,LysoPAFAT,RGD1563994	lysophosphatidylcholine acyltransferase 2	Q7L5N7		Cytoplasm	enzyme			54947	270084	307713
LXR ligand-LXR-Retinoic acid-RXRα	LXR ligand-LXR-Retinoic acid-RXRalpha,Oxysterol-LXRα-Retinoic acid-RXRα	--	--	12	Nucleus	complex
MAF	2810401A20Rik,A230108G15RIK,AW047063,C-MAF,Maf2,MGC71685,V-MAF AVIAN MUSCULOAPONEUROTIC FIBROSARCOMA ONCOGENE HOMOLOG	v-maf musculoaponeurotic fibrosarcoma oncogene homolog (avian)	O75444		Nucleus	transcription regulator			4094	17132	54267
MAFA	hMafA,Maf,RGD1562627,RIPE3b1	v-maf musculoaponeurotic fibrosarcoma oncogene homolog A (avian)	Q8NHW3	14	Nucleus	transcription regulator			389692	378435	366949
MAFB	b-maf,Basic domain/leucine zipper transcription factor,Kr,Kreisler,KRML,Krml1,MAF RELATED B ZIP,Maf1,MGC43127	v-maf musculoaponeurotic fibrosarcoma oncogene homolog B (avian)	Q9Y5Q3	14	Nucleus	other			9935	16658	54264
MAFG	AA545192,C630022N07RIK,hMAF,MGC13090,MGC20149	v-maf musculoaponeurotic fibrosarcoma oncogene homolog G (avian)	O15525	12	Nucleus	transcription regulator			4097	17134	64188
MAML1	AI644666,AW743257,D930008C07RIK,FLJ53540,KIAA0200,MAM-1,mKIAA0200,MM,RP23-237P10.1	mastermind-like 1 (Drosophila)	Q92585	12	Nucleus	transcription regulator			9794	103806	303101
MAP4	AA407148,DKFZp779A1753,MGC8617,MTAP4	microtubule-associated protein 4	P27816		Cytoplasm	other	Efficacy		4134	17758	367171
MAP3K1	MAPK,MAPKKK1,MEK KINASE,MEK KINASE 1,MEKK,MEKK1,Raf,SRXY6	mitogen-activated protein kinase kinase kinase 1	Q13233	18	Cytoplasm	kinase			4214	26401	116667
MAPK14	CRK1,CSBP,CSBP1,CSBP2,CSPB1,EXIP,Hog,MAPK p38,MGC102436,MGC105413,MGC142910,MXI2,P38,P38 KINASE,P38 Map Kinase,p38 MAPK,p38 Mapk alpha,p38 MAPK-α,P38-ALPHA,p38-RK,p38/Hog1,p38/Mpk2,P38/RK,p38a,p38Hog,PRKM14,PRKM15,RK,SAPK2A	mitogen-activated protein kinase 14	--	23	Cytoplasm	kinase		SCIO-469, RO-3201195	1432	26416	81649
Mapk	MAP Kinase,NGF/EGF DEPENDENT KINASE	--	--	16	Cytoplasm	group	Diagnosis,Disease Progression,Efficacy,Prognosis,Response to Therapy
MAPKAPK2	AA960234,MAPKAP KINASE-2,MK2,Rps6kc1	mitogen-activated protein kinase-activated protein kinase 2	P49137	7	Nucleus	kinase			9261	17164	289014
MAPKAPK2/3	Mk2/mk3	--	--	7	Nucleus	group
MARS	FLJ35667,METRS,MGC90747,MRS,MTRNS	methionyl-tRNA synthetase	P56192		Cytoplasm	enzyme			4141	216443	299851
MATR3	1110061A14RIK,2810017I02Rik,AI841759,AW555618,D030046F20Rik,DKFZp686K0542,DKFZp686K23100,KIAA0723,MATRIN 3,MGC9105,mKIAA0723,MPD2,P130/MAT3,VCPDM	matrin 3	P43243	5	Nucleus	other			9782	17184	29150
MAZ	MAZI,MYC ASSOCIATED ZNF,PUR1,SAF-1,SAF-2,SAF-3,ZF87,Zif87,ZNF801	MYC-associated zinc finger protein (purine-binding transcription factor)	P56270	16	Nucleus	transcription regulator			4150	17188	691842
MBD1	CXXC3,PCM1,RFT	methyl-CpG binding domain protein 1	Q9UIS9	4	Nucleus	transcription regulator			4152	17190	291439
MCM2	AA959861,AW476101,BM28,CCNL1,cdc19,CDCL1,D3S3194,KIAA0030,Mcmd2,MGC10606,MITOTIN,mKIAA0030	minichromosome maintenance complex component 2	P49736	14	Nucleus	enzyme	Diagnosis,Disease Progression,Efficacy,Prognosis,Unspecified Application		4171	17216	312538
MCM3	AL033361,C80350,HCC5,HRLF BETA SUBUNIT (P102 PROTEIN),Mcmd,MGC1157,Mini chromosome maintenance deficient 3,P1,P1-MCM3,P1.h,p1.m,RLFB	minichromosome maintenance complex component 3	P25205	14	Nucleus	enzyme			4172	17215	316273
MCM4	19G,AI325074,AU045576,CDC21,CDC21 homolog,CDC54,hCdc21,KIAA4003,mcdc21,Mcmd4,MGC33310,mKIAA4003,P1-CDC21	minichromosome maintenance complex component 4	P33991	14	Nucleus	enzyme	Disease Progression,Prognosis		4173	17217	29728
MCM5	AA617332,AI324988,AL033333,CDC46,mCD46,mCDC46,Mcmd5,MGC5315,P1-CDC46	minichromosome maintenance complex component 5	P33992	14,25	Nucleus	enzyme	Disease Progression		4174	17218	291885
MCM6	ASP-l1,D1Wsu22e,KI-MCM6,MCG40308,Mcmd6,Mis5,MM6,P105MCM	minichromosome maintenance complex component 6	Q14566	14	Nucleus	enzyme	Prognosis		4175	17219	29685
MDC1	6820401C03,AA413496,DKFZp781A0122,KIAA0170,MGC166888,mKIAA0170,NFBD1	mediator of DNA-damage checkpoint 1	Q14676	14	Nucleus	other			9656	240087	309595
MDH1	B230377B03RIK,D17921,Malate dehydrogenase 1 cytoplasmic,Malate dehydrogenase 1 nad soluble,Mdh,MDH-s,MDHA,Mdhl,MDL1,MGC:1375,MOR2	malate dehydrogenase 1, NAD (soluble)	P40925	6	Cytoplasm	enzyme			4190	17449	24551
MDH2 (includes EG:17448)	M-MDH,Malate Dehydrogenase,Malate dehydrogenase 1 mitochondrial,Malate dehydrogenase 2 mitochondrial,MDH,MGC:3559,MOR1	malate dehydrogenase 2, NAD (mitochondrial)	P40926		Cytoplasm	enzyme			4191	17448	81829
MDM2	1700007J15Rik,AA415488,HDM2,HDMX,MDM2-A1,MGC5370,MGC71221,Transformed mouse 3t3 cell double minute 2	Mdm2 p53 binding protein homolog (mouse)	Q00987	13	Nucleus	transcription regulator	Diagnosis,Disease Progression,Efficacy,Prognosis		4193	17246	314856
MDM4	4933417N07RIK,AA414968,AL023055,AU018793,AU021806,C85810,DKFZp781B1423,HDMX,MDMX,MGC132766,MRP1	Mdm4 p53 binding protein homolog (mouse)	O15151	8	Nucleus	other			4194	17248	304798
Mdm2-Tp53-Mdm4		--	--	8	Nucleus	complex
MEF2	MEFs,RSRF	--	--	17	Nucleus	group
MEF2A	A430079H05Rik,ADCAD1,M-S EF2A,mef2,RSRFC4,RSRFC9	myocyte enhancer factor 2A	Q02078	17	Nucleus	transcription regulator			4205	17258
MEF2C	5430401D19RIK,9930028G15RIK,AV011172,Mef2,MYOCYTE ENHANCER FACTOR 2C,Myocyte specific enhancer factor 2,RGD1563119	myocyte enhancer factor 2C	Q06413	17	Nucleus	transcription regulator	Unspecified Application		4208	17260	499497
MEF2D	2210408E11RIK,C80750,DKFZp686I1536,MGC31718,MGC93400	myocyte enhancer factor 2D	Q14814	17	Nucleus	transcription regulator			4209	17261	81518
MEF2D-NFAT2-p300		--	--	17	Nucleus	complex
methyltransferase		--	--	4	unknown	group
MHC Class I (complex)	MHC-1	--	--	22	Plasma Membrane	complex
MHC Class II (complex)	HLA Class II,MHC II	--	--	15	Plasma Membrane	complex
Mi2		--	--	8	Nucleus	group
MIA3	9130229H14RIK,A930039G15RIK,ARNT,AU022327,B230399H06Rik,C129 reactive peptide,C80126,D320,FLJ21469,FLJ39207,Gm1525,KIAA0268,RP11-378J18.4,TANGO,TANGO1,UNQ6077	melanoma inhibitory activity family, member 3	Q5JRA6	14	Cytoplasm	other			375056	338366
MID1IP1	3110038L01RIK,FLJ10386,G12-like,MGC72582,MIG12,S14R,slap,STRAIT11499,THRSPL	MID1 interacting protein 1 (gastrulation specific G12 homolog (zebrafish))	--	23	Cytoplasm	other			58526	68041	404280
mir-145	hsa-mir-145,microRNA 145,MIRN145,miRNA145,mmu-mir-145,rno-mir-145	microRNA 145	--	25	Cytoplasm	microRNA			406937	387163	100314036
MKI67	D630048A14Rik,KI-67,KIA,MIB1,MIKI67A,MKI67A	antigen identified by monoclonal antibody Ki-67	P46013	8	Nucleus	other	Diagnosis,Disease Progression,Efficacy,Prognosis,Response to Therapy,Unspecified Application		4288	17345	291234
MKL1	AI852829,AMKL,AW743281,AW821984,BSAC,MAL,MRTF-A	megakaryoblastic leukemia (translocation) 1	Q969V6	5	Nucleus	transcription regulator			57591	223701	315151
MLL5	1810033J14Rik,9530077A04Rik,D230038D11Rik,FLJ10078,FLJ14026,HDCMC04P,KMT2E,MGC70452	myeloid/lymphoid or mixed-lineage leukemia 5 (trithorax homolog, Drosophila)	Q8IZD2	8	Nucleus	enzyme			55904	69188	311968
MLXIPL	bHLHd14,CHREBP,MIO,MONDOB,WBSCR14,WS-bHLH	MLX interacting protein-like	--		Nucleus	transcription regulator			51085	58805	171078
Mmp	Matrix Metalloproteinase,MATRIX METALLOPROTEINASES,mmp (Matrix Metalloproteinase),mmpi,MMPs,Mt-mmp	--	--	19	Nucleus	group	Diagnosis,Efficacy
MORC3	1110051N18RIK,AI452146,BF318192,D16Jhu32e,KIAA0136,NXP2,ZCW5,ZCWCC3	MORC family CW-type zinc finger 3	Q14149	4	Nucleus	other			23515	338467	304074
MPP1	AAG12,C130070C03Rik,DXS552E,EMP55,MRG1,p55,PEMP	membrane protein, palmitoylated 1, 55kDa	Q00013		Plasma Membrane	kinase			4354	17524
MRC2	CD280,CLEC13E,ENDO180,FLJ35911,KIAA0709,MGC141530,mKIAA0709,TEM9,UPARAP	mannose receptor, C type 2	Q9UBG0	19	Plasma Membrane	transmembrane receptor			9902	17534	498011
MSH2	AI788990,COCA1,FCC1,HNPCC,HNPCC1,LCFS2	mutS homolog 2, colon cancer, nonpolyposis type 1 (E. coli)	P43246	7	Nucleus	enzyme	Diagnosis,Disease Progression,Efficacy,Prognosis,Response to Therapy		4436	17685	81709
MSH6	AU044881,AW550279,GTBP,Gtmbp,HNPCC5,HSAP	mutS homolog 6 (E. coli)	P52701	8	Nucleus	enzyme	Diagnosis		2956	17688
MSN	C78546,MOESIN	moesin	P26038		Plasma Membrane	other			4478	17698	81521
MTA2	AW550797,DKFZp686F2281,Mata1l1,mmta2,MTA-L1,MTA1-L1,PID	metastasis associated 1 family, member 2	O94776	8	Nucleus	transcription regulator			9219	23942	361724
MTORC1		--	--	24	Cytoplasm	complex
MYB	AI550390,C-MYB,c-myb CDS,efg,M16449,MGC18531,RGD1560020	v-myb myeloblastosis viral oncogene homolog (avian)	P10242		Nucleus	transcription regulator			4602	17863	498982
MYBBP1A	AL024407,AU019902,DBP,FLJ37886,P160,P160 myb-bin,p160MBP,p67MBP,PAP2	MYB binding protein (P160) 1a	Q9BQG0	7	Nucleus	transcription regulator			10514	18432	60571
MYBL2	B-MYB,MGC15600,MYB-Related Protein B,MYBB	v-myb myeloblastosis viral oncogene homolog (avian)-like 2	--		Nucleus	transcription regulator			4605	17865	296344
MYC	AU016757,bHLHe39,C-MYC,C-MYC-P64,MGC105490,MGC138120,mMyc,MRTL,Myc2,Niard,Nird,RNCMYC	v-myc myelocytomatosis viral oncogene homolog (avian)	--	25	Nucleus	transcription regulator	Diagnosis,Efficacy,Prognosis,Response to Therapy,Unspecified Application		4609	17869	24577
MYH9	BDPLT6,C80049,D0Jmb2,DFNA17,E030044M24Rik,EPSTS,FLTN,FTNS,MGC104539,MHA,MNMM IIA,Myhn-1,Myosib IIA,MYOSIN HEAVY CHAIN 9,Myosin IIa,Myosin nonmuscle heavy chain 2a,NMHC-II-A,NMHCA,NMMHC II-a,NMMHC-A,NONMUSCLE MYOSIN2 HEAVY CHAIN TYPE A,TU72.6	myosin, heavy chain 9, non-muscle	P35579	7	Cytoplasm	enzyme			4627	17886	25745
MYH10	5730504C04Rik,9330167F11Rik,Fltn,IIB,MCH-B,MGC115764,MGC134913,MGC134914,mKIAA3005,MYHN2,Myosin IIB,Nm HC myosin B,NM Myosin-HC,NMHC II-B,NMHC-B,NMMHC II-b,NMMHC-B,Nonmuscle myosin II,NONMUSCLE MYOSIN2B,SMEMB	myosin, heavy chain 10, non-muscle	P35580	7	Cytoplasm	other	Unspecified Application		4628	77579	79433
MYO1B	AA406997,Mi130,MYH-1C,MYO1B Heavy Chain,Myosin i,MYOSIN I ALPHA,myosin-1b,Myr1	myosin IB	O43795		Cytoplasm	other			4430	17912	117057
MYOCD	BSAC2A,MYCD,MYOCARDIN,SRFCP	myocardin	Q8IZQ8	20	Nucleus	transcription regulator			93649	214384	246297
MYOD1	AI503393,bHLHc1,MD1,MGC156574,MYF3,MYOD,PUM	myogenic differentiation 1	--		Nucleus	transcription regulator	Prognosis		4654	17927	337868
N-cor		--	--	5	Nucleus	group
NAB1	EGR1 binding protein 1,NGFI-A BINDING PROTEIN 1,TRANSCRIPTIONAL REGULATORY PROTEIN p54	NGFI-A binding protein 1 (EGR1 binding protein 1)	Q13506	8	Nucleus	transcription regulator			4664	17936	64824
NADPH oxidase		--	--	19	Plasma Membrane	complex
NANOG	2410002E02Rik,ecat4,ENK,LOC100038891,LOC100293888	Nanog homeobox	--		Nucleus	transcription regulator	Diagnosis,Efficacy		79923	71950	414065
NANS	4632418E04Rik,BB056474,SAS,Sialic Acid Synthase	N-acetylneuraminic acid synthase	Q9NR45		Cytoplasm	enzyme			54187	94181	298071
NAP1L1	AA407126,AI256722,D10Ertd68e,Dn38,FLJ16112,MGC23410,MGC72278,MGC8688,NAP,NAP-1,NAP1-LIKE,NAP1L,NRP	nucleosome assembly protein 1-like 1	P55209	7	Nucleus	other			4673	53605	89825
NARS	3010001M15Rik,AA960128,Asn tRNA Synthetase,ASNRS,Asparaginyl tRNA Synthetase,C78150,LRRGT00113,MGC116236,NARS1	asparaginyl-tRNA synthetase	O43776	17	Cytoplasm	enzyme			4677	70223	291556
NCAPD2	2810406C15Rik,2810465G24RIK,CAP-D2,CNAP1,EG7,hCAP-D2,KIAA0159,MGC39046,mKIAA0159,RGD1562596	non-SMC condensin I complex, subunit D2	Q15021		Nucleus	other			9918	68298	362438
NCBP1	AU014645,AW538051,CBP80,MGC105807,MGC2087,NCBP,NCBP 80 kDa subunit,Nuclear cap binding protein 80 kd,Sto1	nuclear cap binding protein subunit 1, 80kDa	Q09161	24	Nucleus	other			4686	433702	298075
NCOA1	bHLHe42,bHLHe74,ERAP160,F-SRC-1,KAT13A,MGC129719,MGC129720,MGC90703,NCOA,RIP160,SRC-1,STEROID RECEPTOR COACTIVATOR 1E	nuclear receptor coactivator 1	Q15788	20	Nucleus	transcription regulator			8648	17977	313929
NCOA2	9530095N19,bHLHe75,D1Ertd433e,GRIP-1,KAT13C,MGC138808,SRC-2,TIF-2	nuclear receptor coactivator 2	Q15596	20	Nucleus	transcription regulator			10499	17978	83724
NCOA3	2010305B15RIK,ACTR,AIB-1,AIB1 DELTA3,AW321064,bHLHe42,CAGH16,CTG26,KAT13B,MGC141848,P/CIP,pCIP,RAC3,SRC-1,SRC-3,TNRC14,TNRC16,TRAM-1	nuclear receptor coactivator 3	Q9Y6Q9	20	Nucleus	transcription regulator	Efficacy,Prognosis		8202	17979	84584
NCOA6	AIB3,ASC-2,Erap140,HNRC,KIAA0181,MGC90663,mKIAA0181,Ncoa7,NRC,PRIP,RAP250,Rnrc,Src6,TRBP	nuclear receptor coactivator 6	--		Nucleus	transcription regulator			23054	56406	116464
NDRG2	AI182517,AU040374,DKFZp781G1938,FLJ25522,KIAA1248,NDR2,Ndrg2b1,SYLD	NDRG family member 2	--	25	Cytoplasm	other			57447	29811	171114
NDUFA9	1010001N11Rik,39 Kda, ci,CC6,CI-39k,Complex I-39KD,MGC111043,NADH UBIQUINONE OXYDOREDUCTASE,ND39,NDUFS2L,SDR22E1	NADH dehydrogenase (ubiquinone) 1 alpha subcomplex, 9, 39kDa	Q16795	6	Cytoplasm	enzyme			4704	66108
NDUFB3	2700033I16Rik,AI415450,B12	NADH dehydrogenase (ubiquinone) 1 beta subcomplex, 3, 12kDa	O43676		Cytoplasm	enzyme			4709	66495	301427
NFAT (complex)	NFATc	--	--	21	Cytoplasm	complex
Nfat (family)	Nfat factors,Nuclear factor of activated Tcells	--	--	17	Cytoplasm	group
NFATC1	2210017P03Rik,AI449492,AV076380,MGC138448,NF-ATC,NFAT2,Nfatcb,RGD1560225	nuclear factor of activated T-cells, cytoplasmic, calcineurin-dependent 1	O95644	21	Nucleus	transcription regulator			4772	18018	307231
NFE2	P45,P45 NF-E2,p45-nf-ec	nuclear factor (erythroid-derived 2), 45kDa	Q16621	12	Nucleus	transcription regulator			4778	18022	366998
NFE2L2	AI194320,BM974200,NRF2	nuclear factor (erythroid-derived 2)-like 2	--		Nucleus	transcription regulator			4780	18024	83619
NFKB2	H2TF1,lyt,LYT-10,MGC93816,NF-kappaB2,NF-κB2 p100,NF-κB2 p52,NFKB,NFκB2,P100,P49,p49/p100,p50 NF KAPPA B HOMOLOG,P50B,P52,P80HT,RGD1307189	nuclear factor of kappa light polypeptide gene enhancer in B-cells 2 (p49/p100)	Q00653	18	Nucleus	transcription regulator			4791	18034	309452
NFkB (complex)	NF-KAPPA B,NF-κB	--	--	1	Nucleus	complex	Diagnosis,Disease Progression,Efficacy,Prognosis
NfkB1-RelA	p50-RelA,RELA-p50	--	--	18	Nucleus	complex
NFKBIA	AI462015,I KAPPA B ALPHA,IKB ALPHA,Ikb Kinase Alpha,IKBA,IKBM,IκBα,MAD-3,NF KAPPA BETA ALPHA,NFKBI,PIKAPPAB ALPHA,RL/IF-1	nuclear factor of kappa light polypeptide gene enhancer in B-cells inhibitor, alpha	P25963	18	Cytoplasm	other			4792	18035	25493
NFYA	AA407810,CBF-A,CBF-B,FLJ11236,HAP2,LOC100129914,NFY,SEZ-10	nuclear transcription factor Y, alpha	--		Nucleus	transcription regulator			4800	18044	29508
NHP2	2410130M07Rik,D11Ertd175e,DKCB2,NHP2P,NOLA2,Nola2 (predicted)	NHP2 ribonucleoprotein homolog (yeast)	Q9NX24	3	Nucleus	other			55651	52530	287273
NKRF	9430034D17RIK,AW124770,C80287,ITBA4,NRF,RGD1563950	NFKB repressing factor	O15226		Nucleus	transcription regulator			55922	77286	298316
NKX2-5	CHNG5,CSX,CSX1,FLJ52202,FLJ97166,FLJ97195,FLJ97197,FLJ99536,NKX2.5,NKX2E,NKX4-1,tinman	NK2 homeobox 5	--		Nucleus	transcription regulator	Diagnosis		1482	18091	114109
NMT1	AW536594,NMT	N-myristoyltransferase 1	P30419		Cytoplasm	enzyme			4836	18107	259274
NNT	4930423F13RIK,AI323702,BB168308,MGC109126,MGC126502,MGC126503,Nadp Transhydrogenase	nicotinamide nucleotide transhydrogenase	Q13423	23	Cytoplasm	enzyme			23530	18115	310378
NOC3L	AD24,AF233884,C10orf117,FAD24,FLJ12820,RGD1560656	nucleolar complex associated 3 homolog (S. cerevisiae)	Q8WTT2		Nucleus	other			64318	57753	361753
NOL6	AA410091,bA311H10.1,FLJ21959,MGC14896,MGC14921,MGC20838,NP6,NRAP,UTP22	nucleolar protein family 6 (RNA-associated)	Q9H6R4	17	Nucleus	other			65083	230082	313167
NOLC1	3230402K17Rik,AA408077,AA536818,AU046071,KIAA0035,mKIAA0035,NOPP130,NOPP140,NS5ATP13,Nucleolar and coiled-body phosphoprotein 1,P130	nucleolar and coiled-body phosphoprotein 1	Q14978	17	Nucleus	transcription regulator			9221	70769	64896
NONO	AA407051,AV149256,MGC103109,MGC109026,NMT55,Non-pou domain-containing octamer binding,nonA,NRB54,Nuclear RNA-binding protein, 54-kD,P54,P54NRB	non-POU domain containing, octamer-binding	Q15233	5	Nucleus	other			4841	53610	317259
NOP56	2310044F10Rik,MGC116301,NOL5A,SCA36	NOP56 ribonucleoprotein homolog (yeast)	O00567	25	Nucleus	other			10528	67134	362214
NOP58	HSPC120,MGC105209,MGC105440,MSSP,Nap65,Nol5,NOP5,NOP5/NOP58,Nucleolar protein 5,nucleolar protein NOP5/NOP58,SIK,Sik sp	NOP58 ribonucleoprotein homolog (yeast)	Q9Y2X3	3	Nucleus	enzyme			51602	55989	60373
Notch	Notch Receptor	--	--	12	Plasma Membrane	group
NPM1	B23,B23.1,B23NP,MGC102162,MGC104254,MGC107291,MGC108517,NO38,NPM,Nucleolar protein B23.2,NUCLEOPHOSMIN,NUMATRIN	nucleophosmin (nucleolar phosphoprotein B23, numatrin)	P06748	17	Nucleus	transcription regulator	Disease Progression,Unspecified Application		4869	18148	25498
NR0B1	AHC,AHCH,AHX,DAX-1,DSS,GTD,HHG,NROB1,SRXY2	nuclear receptor subfamily 0, group B, member 1	--		Nucleus	ligand-dependent nuclear receptor			190	11614	58850
NR0B2	FLJ17090,SHP,SHP-1	nuclear receptor subfamily 0, group B, member 2	--		Nucleus	ligand-dependent nuclear receptor			8431	23957	117274
NR1D1	A530070C09Rik,c-Erb,ear-1,hRev,R75201,Rev-Erb alpha,REV-ERBAALPHA,Rev-Erbα,REVERB,THRA1,THRAL	nuclear receptor subfamily 1, group D, member 1	--		Nucleus	ligand-dependent nuclear receptor			9572	217166	252917
NR1H2	AI194859,Liver X receptor,LXR,LXR BETA,LXR-b,NER,NER-I,NER1,OR-1,Retinoid x receptor interacting,RIP15,UNR,Unr2,UR	nuclear receptor subfamily 1, group H, member 2	P55055	12	Nucleus	ligand-dependent nuclear receptor			7376	22260	58851
NR1H3	AU018371,CHOP,LXR,LXR ALPHA,LXR-A,LXR-α,RLD-1,Unr1	nuclear receptor subfamily 1, group H, member 3	Q13133	12	Nucleus	ligand-dependent nuclear receptor			10062	22259	58852
Nr1h	LXR	--	--	12	Nucleus	group
NR2F2	2700033K02RIK,9430015G03Rik,Aporp1,ARP-1,Coup TFIIb,COUP-TF2,COUP-TFII,COUPTFB,EAR3,MGC117452,NF-E3,NR2F1,SVP40,Tcfcoup2,TFCOUP2	nuclear receptor subfamily 2, group F, member 2	--		Nucleus	ligand-dependent nuclear receptor			7026	11819	113984
NR3C1	GCCR,GCR,GCR ALPHA,GLUCOCORTICOID RECEPTOR,GLUCOCORTOCOID RECEPTOR,GR,Gr alpha,Gr beta,GR-A,GRL,Grl-1,HGR,Type ii corticosteroid receptor	nuclear receptor subfamily 3, group C, member 1 (glucocorticoid receptor)	P04150	9	Nucleus	ligand-dependent nuclear receptor	Efficacy	rimexolone, medrysone, clocortolone pivalate, diflorasone diacetate, fluorometholone, dexamethasone phosphate, cortisone acetate, halcinonide, flurandrenolide, desoximetasone, desonide, prednisolone, clobetasol propionate, fluocinolone acetonide, prednisone, hydrocortisone, triamcinolone, dexamethasone 21-acetate, 11beta hydrocortisone acetate, betamethasone, dexamethasone, budesonide, fluticason…	2908	14815	24413
NR3C2 (includes EG:110784)	FLJ41052,MCR,MGC133092,MINERALOCORTICOID RECEPTOR,MLR,MR,NR3C2VIT,TYPE1 CORTICOSTEROID RECEPTOR	nuclear receptor subfamily 3, group C, member 2	P08235		Nucleus	ligand-dependent nuclear receptor		hydrochlorothiazide/spironolactone, fludrocortisone acetate, drospirenone, spironolactone, eplerenone	4306	110784	25672
NR4A1	FAMILY 4 NUCLEAR HORMONE RECEPTOR 1,Gfrp,GFRP1,Hbr-1,HMR,Hormone receptor,MGC9485,N10,NAK-1,NGFI-B,NP10,NUR77,NURA,NURR77,TIS1,TR3,TR3 ORPHAN RECEPTOR	nuclear receptor subfamily 4, group A, member 1	--		Nucleus	ligand-dependent nuclear receptor	Unspecified Application		3164	15370	79240
NR4A2	FAMILY 4 NUCLEAR HORMONE RECEPTOR 2,HZF-3,NOT,NURR1,Nurr2,RNR-1,TINOR,TINUR	nuclear receptor subfamily 4, group A, member 2	P43354	15	Nucleus	ligand-dependent nuclear receptor			4929	18227	54278
NR5A1	AD4BP,Ad4BP/SF-1,ELP,ELP-3,FTZ1,FTZF1,MGC124277,MGC124278,Nuclear receptor subfamily 5, group A, member 1,POF7,SF-1,SPGF8,SRXY3	nuclear receptor subfamily 5, group A, member 1	Q13285	16	Nucleus	ligand-dependent nuclear receptor			2516	26423	83826
NR5A2	AU020803,B1F,B1F2,CPF,D1Ertd308e,FTF,FTF-2,FTZ-F1,FTZ-F1beta,hB1F-2,LRH-1	nuclear receptor subfamily 5, group A, member 2	O00482	9	Nucleus	ligand-dependent nuclear receptor			2494	26424	60349
NRD1 (includes EG:230598)	2600011I06Rik,AI875733,hNRD1,hNRD2,MGC25477,NARDILYSIN,NRD-C	nardilysin (N-arginine dibasic convertase)	O43847		Cytoplasm	peptidase			4898	230598	25499
NRIP1	6030458L20Rik,8430438I05RIK,9630050P12,AA959574,AW456757,FLJ77253,NUCLEAR FACTOR RECEPTOR INTERACTING PROTEIN 140,RIP140	nuclear receptor interacting protein 1	P48552	20	Nucleus	transcription regulator			8204	268903	304157
NRL	AW492574,D14H14S46E,D14S46E,Nrl (predicted),NRL-MAF,RP27	neural retina leucine zipper	P54845		Nucleus	transcription regulator			4901	18185	290221
NSDHL	AI747449,Av017044,Bpa,H105E3,MGC105618,NAD(P) dependent steroid dehydrogenase-like,Nadp-dependent steroid dehydrogenase-like,SDR31E1,Str,XAP104	NAD(P) dependent steroid dehydrogenase-like	Q15738	4	Cytoplasm	enzyme			50814	18194	309262
NUMA1	6720401E04Rik,AA764025,AL022610,AU014979,NUCLEAR MATRIX ANTIGEN,NUMA	nuclear mitotic apparatus protein 1	Q14980	10	Nucleus	other			4926	101706	308870
NUP107	AW541137,C76801,Nucleoporin Nup107,NUP84	nucleoporin 107kDa	P57740	4	Nucleus	transporter			57122	103468	116555
NUP155	D930027M19Rik,KIAA0791,mKIAA0791,N155,Nucleoporin Nup155	nucleoporin 155kDa	O75694	6	Nucleus	transporter			9631	170762	117021
NUP160	2810011M03Rik,AA414952,AU020188,DKFZp686M14102,Gtl-13,Gtl1-13,KIAA0197,MGC150678,MGC150679,mKIAA0197,NUP120	nucleoporin 160kDa	Q12769	4	Nucleus	transporter			23279	59015	311182
NUP85 (includes EG:287830)	FLJ12549,FROUNT,MGC105225,NUP75,PCNT1	nucleoporin 85kDa	Q9BW27	8	Cytoplasm	other			79902	445007	287830
NUPR1	2310032H04Rik,COM1,Nuclear Protein 1,P8,Protein p8	nuclear protein, transcriptional regulator, 1	--		Nucleus	transcription regulator			26471	56312	113900
NuRD	Mi2-NuRD	--	--	8	Nucleus	complex
ONECUT2	C730009D12,MGC120377,MGC120378,MGC124203,OC-2,RGD1564677	one cut homeobox 2	O95948		Nucleus	transcription regulator			9480	225631	307376
ORC1 (includes EG:18392)	AA545195,HSORC1,MmORC1,Orc1b,ORC1L,Origin recognition,PARC1	origin recognition complex, subunit 1	--	25	Nucleus	other			4998	18392	313479
ORC5 (includes EG:26429)	AL033327,MmORC5,ORC5L,ORC5P,ORC5T	origin recognition complex, subunit 5	O43913	14	Nucleus	other	Prognosis		5001	26429	362304
OTX1	A730044F23Rik,FLJ38361,jv,MGC15736,OTX1X	orthodenticle homeobox 1	P32242	16	Nucleus	transcription regulator			5013	18423	25646
p160		--	--	20	Nucleus	group
P-TEFb		--	--	3	unknown	complex
P38 MAPK	P38,p38 MAP KINASE,P38 MITOGEN-ACTIVATED PROTEIN KINASE	--	--	7	Cytoplasm	group
P4HA1	AL022634,P4h,P4HA,P4Halpha(I),PHalphaI,Prolyl 4 Hydroxylase Alpha 1 Subunit,Prolyl 4-Hydroxylase alpha,PROPYL 4-HYDROXYLASE ALPHA SUBUNIT	prolyl 4-hydroxylase, alpha polypeptide I	P13674	9	Cytoplasm	enzyme	Unspecified Application		5033	18451	64475
p70 S6k	p70,p70 S6 Kinase,S6K	--	--	24	Cytoplasm	group
PA2G4	AA672939,EBP1,HG4-1,Itaf45,MGC94070,p38-2G4,Plfap,PROLIFERATION ASSOCIATED 2G4,Proliveration-associated protein 1	proliferation-associated 2G4, 38kDa	Q9UQ80	7	Nucleus	transcription regulator			5036	18813	288778
PABPC1	ePAB,MGC91496,PAB1,PABP,PABP1,PABPC2,PabpI,PABPL1,POLYA BINDING	poly(A) binding protein, cytoplasmic 1	P11940	4	Cytoplasm	translation regulator			26986	18458	171350
PABPC4	APP-1,FLJ43938,iPABP,MGC11665,MGC6685,PABP4,Poly(A)-binding protein, cytoplasmic 4 (inducible form),Polyadenylate-binding	poly(A) binding protein, cytoplasmic 4 (inducible form)	Q13310	24	Cytoplasm	other			8761	230721	298510
PAICS	2610511I09Rik,ADE2,ADE2H1,AIRC,DKFZp781N1372,MGC1343,MGC5024,MGC93240,PAIS	phosphoribosylaminoimidazole carboxylase, phosphoribosylaminoimidazole succinocarboxamide synthetase	P22234		Cytoplasm	enzyme			10606	67054	140946
PAPOLA	MGC5378,PAP,PapIII,Plap,POLY(A) POLYMERASE ALPHA,POLYA POLYMERASE	poly(A) polymerase alpha	P51003	14	Nucleus	enzyme			10914	18789	314417
PARK7	CAP1,DJ-1,FLJ27376,FLJ34360,FLJ92274,RNA-BINDING PROTEIN REGULATORY SUBUNIT,SP22	parkinson protein 7	Q99497	20	Nucleus	enzyme	Diagnosis		11315	57320	117287
PARP1	5830444G22Rik,Adprp,Adprp1,ADPRT,ADPRT 1,AI893648,C80510,MGC93658,PADPRT,pADPRT-1,PARP,PARS,POLY(ADP-RIBOSE) POLYMERASE 1,PPOL,sPARP-1	poly (ADP-ribose) polymerase 1	P09874	11	Nucleus	enzyme	Diagnosis,Efficacy,Prognosis	ABT-888, olaparib, INO-1001	142	11545	25591
PARP	Pap,Poly ADP-ribose polymerase,POLY(ADP-RIBOSE) POLYMERASE	--	--	11	Nucleus	group
PBRM1	2310032M22RIK,2610016F04Rik,AI507524,BAF180,MGC156155,MGC156156,PB1,RGD1565549	polybromo 1	Q86U86		Nucleus	other			55193	66923	306254
PCBP1	ALPHA CP1,CP1,HNRNP E1,Hnrnp K Like/Sub2.3,hnRNP-X,HNRPE1,HNRPX,RGD1561319,WBP17,[a]CP-1	poly(rC) binding protein 1	Q15365	21	Nucleus	translation regulator			5093	23983	500242
PCBP2	ALPHA CP2,AW412548,CP2,hnRNP X,HNRNP-E2,HNRPE2,Hnrpx,MGC107004,MGC110998	poly(rC) binding protein 2	Q15366	21	Nucleus	other			5094	18521	363005
PCNA	MGC8367,Pcna/cyclin,PCNAR	proliferating cell nuclear antigen	P12004	15	Nucleus	enzyme	Diagnosis,Disease Progression,Prognosis,Response to Therapy		5111	18538	25737
PDCD11	1110021I22Rik,ALG-4,KIAA0185,mKIAA0185,NFBP,Pdcd11 predicted,Pdcd7,RRP5	programmed cell death 11	Q14690		Nucleus	other			22984	18572	309458
Pde	PHOSPHODIESTERASE,phosphoric diester hydrolase	--	--	15	Cytoplasm	group
PDE4A	D9Ertd60e,DPDE2,Pde2/iva,PDE4,PDE46,PDE4A11,Pde4a1a,PDE4A4,Pde4a8,PHOSA	phosphodiesterase 4A, cAMP-specific	P27815	15	Cytoplasm	enzyme		arofylline, tetomilast, L 869298, anagrelide, cilomilast, milrinone, rolipram, L-826,141, amrinone, roflumilast, pentoxifylline, caffeine	5141	18577	25638
PDGF BB	Pdgfb dimer	--	--	19	Extracellular Space	complex	Efficacy,Unspecified Application
PDGFC	1110064L01Rik,AI647969,FALLOTEIN,SCDGF	platelet derived growth factor C	Q9NRA1		Extracellular Space	growth factor			56034	54635	79429
Pdgfr	PDGF Receptor	--	--	24	Plasma Membrane	group	Efficacy
PDIA3	ER60,Erp,ERP57,ERP60,ERp61,Glucose Regulated Protein, 58kd,GRP57,GRP58,Hs.308709,HsT17083,Microsomal CPT,Microsomal protease er-60,MTP,P58,PDI,PDI-Q2,PHOSPHOLIPASE C ALPHA,PI-PLC,Pi-plc 1,Plca,PLC[a],Protein disulfide isomerase	protein disulfide isomerase family A, member 3	P30101	24	Cytoplasm	peptidase	Diagnosis		2923	14827	29468
PDIA4	AI987846,Cab2,Cabp2,CAI,Endoplasmic Reticulum Stress Protein 72,ERP70,ERP72,PROTEIN DISULFIDE ISOMERASE RELATED	protein disulfide isomerase family A, member 4	P13667	22	Cytoplasm	enzyme			9601	12304	116598
PEPCK	phosphoenolpyruvate carboxykinase	--	--	12	Nucleus	group
PES1	FLJ43790,MGC125075,PES,Pescadillo	pescadillo homolog 1, containing BRCT domain (zebrafish)	O00541	8	Nucleus	other			23481	64934	289740
PFN1	Pfn,PROFILIN,PROFILIN1	profilin 1	P07737	10	Cytoplasm	other	Unspecified Application		5216	18643	64303
PGK1	3-PHOSPHOGLYCERATE KINASE,MGC105265,MGC117307,MGC118097,MGC142128,MGC8947,MIG10,PGK,PGKA,Phosphoglycerate kinase 1,X-Chromosome Linked Phosphoglycerate Kinase,X-LINKED PHOSPHOGLYCERATE KINASE	phosphoglycerate kinase 1	P00558	12	Cytoplasm	kinase			5230	18655	24644
Pgk	3-PGK,3-phosphoglycerate kinase,3-phosphoglycerate phosphokinase,3-phosphoglyceric acid kinase,3-phosphoglyceric acid phosphokinase,3-phosphoglyceric kinase,ATP-3-phospho-D-glycerate-1-phosphotransferase,ATP:3-phospho-D-glycerate 1-phosphotransferase,ATP:D-3-phosphoglycerate 1-phosphotransferase,glycerate 3-phosphate kinase,glycerophosphate kinase,Phosphoglycerate Kinase,phosphoglyceric acid kina…	--	--	10	unknown	group
PGR (includes EG:18667)	9930019P03Rik,BB114106,ENSMUSG00000074510,LOC360433,NR3C3,Pgrb,PR,PR BETA,PROGESTERONE RECEPTOR,Progesterone receptor A	progesterone receptor	P06401	16	Nucleus	ligand-dependent nuclear receptor	Diagnosis,Efficacy,Response to Therapy	misoprostol, dienogest, ulipristal acetate, asoprisnil, ethynodiol diacetate, norethindrone acetate, ethinyl estradiol/ethynodiol diacetate, estradiol cypionate/medroxyprogesterone acetate, tosagestin, estradiol/norethindrone acetate, ZK 230211, nestorone, drospirenone/ethinyl estradiol/levomefolic acid, ethinyl estradiol/desogestrel, ethinyl estradiol/drospirenone, ethinyl estradiol/norelgestrom…	5241	18667	25154
PGRMC1	25-Dx,AA415812,HPR6.6,Iza,Membrane-Associated Progesterone Receptor Component,MPR,PGRMC,PPMR,VEMA	progesterone receptor membrane component 1	O00264	10	Plasma Membrane	transmembrane receptor			10857	53328	291948
PHB2	AU044498,BAP,BAP37,Bcap27,BCAP37,BCR ASSOCIATED PROTEIN37,MGC117268,p22,PNAS-141,PROHIBITIN 2,REA,TERP1	prohibitin 2	Q99623	20	Cytoplasm	transcription regulator			11331	12034	114766
PHIP	2810004D21RIK,4632404O06Rik,DCAF14,FLJ20705,FLJ45918,MGC90216,Ndrp,PHIP1,RGD1564964,WDR11	pleckstrin homology domain interacting protein	Q8WWQ0		Nucleus	other			55023	83946	315843
Phosphatase	Phosphatases,phosphoric monoester hydrolase,protein phosphatase	--	--	21	unknown	group
PI3K (complex)	1-phosphatidylinositol 3-kinase,ATP:1-phosphatidyl-1D-myo-inositol 3-phosphotransferase,Phosphatidylinositol 3 kinase,phosphatidylinositol 3'-kinase,PI3-kinase,PtdIns 3 Kinase,type I phosphatidylinositol kinase,type III phosphoinositide 3-kinase,Vps34p	--	--	10	Cytoplasm	complex	Prognosis
PIAS4	FLJ12419,MGC35296,Pias-gamma,Piasg,PIASY,PIASγ,ZMIZ6	protein inhibitor of activated STAT, 4	Q8N2W9	16	Nucleus	transcription regulator			51588	59004	362827
PIK3C2A	CPK,Cpk-m,DKFZp686L193,DM 68D,MGC142218,p170 Pi3-kinase,PI3-K-C2(ALPHA),PI3-K-C2A,PI3K-C2 ALPHA,PI3KC2	phosphoinositide-3-kinase, class 2, alpha polypeptide	O00443	10	Cytoplasm	kinase			5286	18704	361632
PIK3IP1	1500004A08RIK,5830455E04RIK,Crkd,HGFL,hHGFL(S),MGC17330,RGD1311203,RP23-191E3.6,zgc:66482	phosphoinositide-3-kinase interacting protein 1	--	23	unknown	other			113791	216505	305472
Pkc(s)	Cnpkc,PKC,Pkc(s),Protein Kinase C	--	--	24	Cytoplasm	group	Efficacy
PKD1	FLJ00285,mFLJ00285,MGC118471,PBP,PC1,POLYCYSTIN 1,TRPP1	polycystic kidney disease 1 (autosomal dominant)	--	23	Plasma Membrane	ion channel			5310	18763	24650
Pkg	Cgk,cGMP dependent protein kinase,PROTEIN KINASE G	--	--	16	Cytoplasm	group
PKLR	L-PK,L-PYRUVATE KINASE,PK1,PKL,Pklg,PKR,PKRL,Pyruvate kinase, liver and rbc,R-PK	pyruvate kinase, liver and RBC	P30613		Cytoplasm	kinase			5313	18770	24651
PKM2	AA414905,AL024370,AL024424,CTHBP,m-Pk,M2-Pk,MGC3932,OIP3,Pk-2,PK3,PKM,PKM12,Pyruvate kinase 3,Pyruvate kinase M,TCB,THBP1	pyruvate kinase, muscle	P14618		Cytoplasm	kinase	Diagnosis,Unspecified Application		5315	18746	25630
PKP1	AI528551,B6P,Band-6-protein,MGC138829,Pph1	plakophilin 1 (ectodermal dysplasia/skin fragility syndrome)	Q13835	1	Plasma Membrane	other			5317	18772	304822
PLA2G7	LDL-PLA2,LP-PLA2,Lyso-Paf Acetyltransferase,MGC95107,PAF ACETYLHYDROLASE,PAF-AH,PAFAH MP,Plasma paf-ah,R75400	phospholipase A2, group VII (platelet-activating factor acetylhydrolase, plasma)	--	23	Extracellular Space	enzyme	Diagnosis,Efficacy	darapladib	7941	27226	301265
PLAG1	MGC94626,PSA,SGPA,ZNF912	pleiomorphic adenoma gene 1	Q6DJT9		Nucleus	transcription regulator			5324	56711	297804
PLAGL1	DKFZp781P1017,LOT1,MGC126275,MGC126276,ZAC,ZAC1	pleiomorphic adenoma gene-like 1	--		Nucleus	transcription regulator			5325	22634	25157
PLAGL2	AU018672,AW552839,FLJ23283,mKIAA0198,PLEOMORPHIC ADENOMA GENE-LIKE 2,ZNF900	pleiomorphic adenoma gene-like 2	Q9UPG8	3	Nucleus	transcription regulator	Disease Progression		5326	54711	296281
PLC	alpha-toxin,Clostridium oedematiens beta- and g-toxins,Clostridium welchii alpha-toxin,heat-labile hemolysin,lecithinase C,lipophosphodiesterase C,lipophosphodiesterase I,phosphatidase C,phosphatidylcholine cholinephosphohydrolase,PHOSPHOINOSITIDE SPECIFIC PHOSPHOLIPASE C,Phospholipase C,Pi-plc	--	--	24	Cytoplasm	group
PLC gamma	Phospholipase C gamma,PLCG,PLCγ	--	--	19	Cytoplasm	group
PLCB3	FLJ37084,KIAA4098,LOC283126,mKIAA4098,PLC BETA3	phospholipase C, beta 3 (phosphatidylinositol-specific)	Q01970	24	Cytoplasm	enzyme			5331	18797	29322
PLDN	BLOC-1,HPS9,MGC114534,PA,PALLID,Pallidin,Stx13bp1	pallidin homolog (mouse)	--	25	Cytoplasm	other			26258	18457	317630
PLG	Ab1-346,AI649309,DKFZp779M0222,GLU PLASMINOGEN,GLU-PG,LPA,Pg,PG2,PLASMINOGEN,Scdp	plasminogen	--	25	Extracellular Space	peptidase	Diagnosis	tenecteplase, PLAT, tranexamic acid, aprotinin, 6-aminocaproic acid, reteplase	5340	18815	85253
PLRG1	AA958940,C80566,MGC105439,MGC110980,PRL1,PRP46,PRPF46	pleiotropic regulator 1	O43660	8	Nucleus	transcription regulator			5356	53317	60376
Pmca		--	--	18	Plasma Membrane	group
PMFBP1	1700016D22Rik,DKFZp434G131,F77,FLJ40146,ODF3,STAP	polyamine modulated factor 1 binding protein 1	Q8TBY8	9	Cytoplasm	other			83449	56523	171414
PML	1200009E24Rik,AI661194,MYL,PML-RARα,PP8675,Retinoic acid receptor,RGD1562602,RNF71,TRIM19	promyelocytic leukemia	P29590	22	Nucleus	transcription regulator		arsenic trioxide	5371	18854	315713
PNP	AL024301,AU015798,FLJ94043,FLJ97288,FLJ97312,MGC117396,MGC125915,MGC125916,NP,Np-1,Np-2,NUCLEOSIDE PHOSPHORYLASE,Pnp1,Pnp2,PRO1837,PUNP,PURINE PHOSPHORYLASE	purine nucleoside phosphorylase	P00491	25	Nucleus	enzyme		forodesine, 9-deaza-9-(3-thienylmethyl)guanine	4860	667034|18950	290029
POLD3	2410142G14Rik,C85233,KIAA0039,MGC119642,MGC119643,P66,P68	polymerase (DNA-directed), delta 3, accessory subunit	Q15054	8	Nucleus	transcription regulator			10714	67967	293144
Polr2l	2510029B14RIK	polymerase (RNA) II (DNA directed) polypeptide L	--	19	Nucleus	enzyme				66491
POU3F2	9430075J19RIK,A230098E07RIK,Brain-2,BRN2,NOCT3,oct-7,OTF-7,POUF3	POU class 3 homeobox 2	P20265	13	Nucleus	transcription regulator			5454	18992	29588
POU3F3	Brain1,BRN1,OTF8,RHS1,Skin1	POU class 3 homeobox 3	P20264	19	Nucleus	transcription regulator			5455	18993	192109
POU4F2	BRN3.2,BRN3B,mBrn3-3R,POU4F-RS1	POU class 4 homeobox 2	--		Nucleus	transcription regulator			5458	18997	171355
POU5F1	MGC22487,OCT-4,OCT3,OCT3/4,OTF-3,Otf3-rs7,Otf3g,OTF4	POU class 5 homeobox 1	Q01860	9	Nucleus	transcription regulator	Diagnosis,Disease Progression		5460	18999	294562
PP1 protein complex group	any Pp1 (protein phosphatase 1 complex),Atp-Mg2+-Dependent Protein Phosphatase,PP1,Pp1 (protein phosphatase 1 complex),PPA1,Protein Phosphatase 1	--	--	5	Cytoplasm	complex
PP1-C	Pp1 Catalytic Subunit	--	--	5	unknown	group
PP2A	PROTEIN PHOSPHATASE 2A,Protein Phosphatase Type2a	--	--	24	Cytoplasm	complex
PPA1	2010317E03RIK,IOPPP,MGC111556,PP,PP1,PYP,pyp rattus protein,Pyrophosphatase Inorganic,Pyrophosphatase inorganic 1,Pyrophosphate Phosphohydrolase,SID6-8061	pyrophosphatase (inorganic) 1	Q15181	6	Cytoplasm	enzyme			5464	67895	294504
PPARA	4933429D07Rik,AI118064,AW742785,hPPAR,MGC2237,MGC2452,NR1C1,PPAR,PPAR ALPHA,PPARα	peroxisome proliferator-activated receptor alpha	Q07869	6	Nucleus	ligand-dependent nuclear receptor	Diagnosis,Prognosis	choline fenofibrate, NS-220, tesaglitazar, clofibrate, fenofibrate, docosahexaenoic acid, gemfibrozil	5465	19013	25747
PPARG	CIMT1,GLM1,NR1C3,PPAR GAMMA 3,PPAR-GAMMA,PPARG1,PPARγ,PPFP	peroxisome proliferator-activated receptor gamma	P37231	15	Nucleus	ligand-dependent nuclear receptor	Diagnosis,Efficacy,Prognosis,Unspecified Application	pioglitazone/metformin, rosiglitazone, GI262570, pioglitazone, tesaglitazar, troglitazone	5468	19016	25664
PPARGC1A	A830037N07RIK,ENSMUSG00000079510,Gm11133,LEM6,Peroxisome Proliferator-Activating Receptor Gamma Coactivator 1 Alpha,PGC-1,PGC-1(alpha),Pgc-1alpha-a,PGC-1v,PGC-1α,PGC1 ALPHA,PGC1A,PGCO1,PPARGC-1 alpha,PPARGC1	peroxisome proliferator-activated receptor gamma, coactivator 1 alpha	--		Nucleus	transcription regulator	Diagnosis,Efficacy		10891	19017	83516
PPARGC1B	4631412G21Rik,DKFZp686C1790,ERRL1,FLJ14284,LOC153346,PERC,PGC-1(beta),PGC1B,PGC1beta	peroxisome proliferator-activated receptor gamma, coactivator 1 beta	--		Nucleus	transcription regulator			133522	170826	291567
PPARα-RXRα	PPARalpha-RXRalpha	--	--	1	Nucleus	complex
PPAT	5730454C12RIK,AA408689,AA675351,AI507113,ATASE,C79945,GPAT,MGC38417,MGC93251,PRAT	phosphoribosyl pyrophosphate amidotransferase	Q06203	6	Cytoplasm	enzyme		6-mercaptopurine, thioguanine, azathioprine	5471	231327	117544
PPIA	2700098C05,CPHN,CYCA,Cyclophilin,CYCLOPHILIN A,Cyclophillin,CyP-18,CYPA,CYPH,LOC100503444,MGC117158,MGC12404,MGC23397,MGC72881,PEPTIDYL-PROLYL CIS-TRANS ISOMERASE,T-Cell Cyclophilin	peptidylprolyl isomerase A (cyclophilin A)	P62937	9	Cytoplasm	enzyme		N-methyl-4-Ile-cyclosporin	5478	268373	25518
PPP1CA	C1,dism2,MGC15877,MGC1674,PP-1A,Pp-1c,PP1 ALPHA,PP1 Alpha C,PP1C ALPHA,PPP1A,Ppp1c,Protein Phosphatase 1,Ser/Thr Phosphatase Type1 alpha	protein phosphatase 1, catalytic subunit, alpha isozyme	P62136	5	Cytoplasm	phosphatase			5499	19045	24668
PPP1CB	1200010B19,Dis2m2,MGC3672,PP-1B,PP-1D,Pp1 delta,PP1-C BETA II,PP1BETA,PPP1C DELTA,PPP1CD,PROTEIN PHOSPHATASE 1 CATALYTIC SUBUNIT, BETA ISOFORM	protein phosphatase 1, catalytic subunit, beta isozyme	P62140	5	Cytoplasm	phosphatase			5500	19046	25594
PPP1CC	dis2m1,LOC360258,PP-1G,PP1,PP1 GAMMA,PP1 GAMMA1,PP1C GAMMA,PP1c gamma1,Pp1g1,Ppp1cc1,PPP1G,Protein Phosphatase 1 gamma	protein phosphatase 1, catalytic subunit, gamma isozyme	P36873	5	Cytoplasm	phosphatase			5501	19047	24669
PPP1R10	2610025H06Rik,CAT53,D17ERTD808E,FB19,PNUTS,PP1R10	protein phosphatase 1, regulatory subunit 10	Q96QC0	5	Nucleus	other			5514	52040	65045
Ppp2c	PP2A,Pp2a Subunit A,Pp2a Subunit C,Pp2a-C,Ppase-2c	--	--	21	unknown	group
PRDX1	ENHANCER,Enhancer protein,Hbp23,MGC108617,MSP23,NKEFA,OSF-3,PAG,PAGA,PAGB,PEROXIREDOXIN 1,PEROXYREDOXIN 1,PrdxI,PRX I,PRX1,TDPX2,TDX2,TPX2,TPxA	peroxiredoxin 1	Q06830	15	Cytoplasm	enzyme	Diagnosis		5052	18477	117254
PREB	C85705,FLJ11114,MGC3467,SEC12	prolactin regulatory element binding	Q9HCU5		Nucleus	transcription regulator			10113	50907	58842
Presenilin		--	--	21	unknown	group
PRKDC	AI326420,AU019811,DNA-DEPENDENT PROTEIN KINASE,DNA-PK,DNA-PKCS,DNAPDcs,DNPK1,DOXNPH,dxnph,HYRC,HYRC1,MGC189093,p220,p350,p460,p460DNA-PK,Scid,slip,XRCC7	protein kinase, DNA-activated, catalytic polypeptide	P78527	21	Nucleus	kinase			5591	19090	360748
PRMT1	6720434D09Rik,ANM1,AW214366,HCP1,Heterogeneous nuclear ribonucleoproteins methyltransferase like 2,heterogeneous ribonucleooproteins methyltransferase-like 2,Hnmt1l2,Hramt,HRMT1L2,IR1B4,Mrmt1	protein arginine methyltransferase 1	Q99873	20	Nucleus	enzyme			3276	15469	60421
PRMT5	HRMT1L5,IBP72,JBP1,SKB1,SKB1HS	protein arginine methyltransferase 5	O14744	4	Cytoplasm	enzyme			10419	27374	364382
Pro-inflammatory Cytokine	INFLAMMATORY CYTOKINE,Inflammatory Response Genes,PRO-INFLAMMATORY CYTOKINES	--	--	15	unknown	group
Profilin		--	--	24	Cytoplasm	group
PROX1	A230003G05RIK	prospero homeobox 1	Q92786	16	Nucleus	transcription regulator	Diagnosis,Disease Progression		5629	19130	305066
PRPF3	3632413F13Rik,HPRP3,HPRP3P,PRP3,Prp3p,RP18,U4/U6-associated RNA splicing factor,U6-90	PRP3 pre-mRNA processing factor 3 homolog (S. cerevisiae)	O43395		Nucleus	other			9129	70767	361995
PRPF6	1190003A07Rik,2610031L17RIK,ANT-1,C20ORF14,hPrp6,MGC11655,MGC156816,MGC36967,MGC38351,PRP6,PUTATIVE MITOCHONDRIAL OUTER MEMBRANE PROTEIN IMPORT RECEPTOR,RGD1307103,TOM,U5 snRNP-associated 102 kDa,U5-102K	PRP6 pre-mRNA processing factor 6 homolog (S. cerevisiae)	O94906		Nucleus	transcription regulator			24148	68879	366276
PRPF8	AU019467,D11Bwg0410e,DBF3/PRP8,HPRP8,PRP8,PRPC8,RP13,Sfprp8l,U5-220	PRP8 pre-mRNA processing factor 8 homolog (S. cerevisiae)	Q6P2Q9		Nucleus	other			10594	192159	287530
PRPF19	AA617263,AL024362,D19WSU55E,hPSO4,LOC246216,MGC124562,NMP200,PRP19,PSO4,SNEV,UBOX4	PRP19/PSO4 pre-mRNA processing factor 19 homolog (S. cerevisiae)	Q9UMS4	9	Nucleus	enzyme			27339	28000	246216
PRPF31	1500019O16RIK,2810404O06Rik,61K,AW554706,DKFZp566J153,NY-BR-99,PRP31,RP11	PRP31 pre-mRNA processing factor 31 homolog (S. cerevisiae)	Q8WWY3		Nucleus	other			26121	68988	292536
PRPF40A	2810012K09Rik,FBP-11,FLAF1,FLJ20585,Fnbp11,FNBP3,HIP-10,HYPA,NY-REN-6,Prp40	PRP40 pre-mRNA processing factor 40 homolog A (S. cerevisiae)	O75400	9	Nucleus	other			55660	56194	295607
PRPF4B	2610037H07,cbp143,dJ1013A10.1,KIAA0536,MGC5960,PR4H,PRP4,PRP4H,PRP4K,Prpk	PRP4 pre-mRNA processing factor 4 homolog B (yeast)	Q13523	4	Nucleus	kinase			8899	19134	291078
PSAT1	D8Ertd814e,EPIP,MGC1460,Phosphoserine Aminotransferase,PSA,PSA1,PSAT,Similar to phosphoserine aminotransferase	phosphoserine aminotransferase 1	Q9Y617		Cytoplasm	enzyme			29968	107272	293820
PSMC1	AI325227,MGC24583,MGC8541,P26S4,p56,Proteasome 26s subunit,RPT2,S4	proteasome (prosome, macropain) 26S subunit, ATPase, 1	P62191	13	Nucleus	peptidase			5700	19179	117263
PSMC6	2300001E01Rik,AI451058,CADP44,MGC12520,MGC151129,P42,P44,PMSC6,RPT4,S10B,SUG2	proteasome (prosome, macropain) 26S subunit, ATPase, 6	P62333	13	Nucleus	peptidase			5706	67089	289990
PSMD1	2410026J11Rik,MGC133040,MGC133041,P112,Proteasome 26s subunit, non-atpase, 1,Rpn2,S1	proteasome (prosome, macropain) 26S subunit, non-ATPase, 1	Q99460	2	Cytoplasm	other			5707	70247	83806
PSMD2	9430095H01Rik,AA407121,MGC116280,MGC14274,P97,Rpn1,S2,TEG-190,Tex190,TRAP-2,TUMOR NECROSIS FACTOR TYPE 1 RECEPTOR-ASSOCIATED PROTEIN 2	proteasome (prosome, macropain) 26S subunit, non-ATPase, 2	Q13200	13	Cytoplasm	other			5708	21762	287984
PSMD3	AI255837,AntP91a,D11Bwg1349e,MGC94658,P58,Psd3,RPN3,S3,TSTA2,Tstap91a,Tum-p91a	proteasome (prosome, macropain) 26S subunit, non-ATPase, 3	O43242	13	Cytoplasm	other			5709	22123	287670
PSMD10	AW554874,dJ889N15.2,GANKYRIN,p28,p28(GANK),p28Gank	proteasome (prosome, macropain) 26S subunit, non-ATPase, 10	--		Cytoplasm	transcription regulator			5716	53380	116722
PSMD12	1500002F15Rik,AI480719,MGC75406,MGC94696,P55,PSD12,Rpn5	proteasome (prosome, macropain) 26S subunit, non-ATPase, 12	O00232	13	Cytoplasm	other			5718	66997	287772
PSMF1	AW048666,BC012260,MGC18784,PI31	proteasome (prosome, macropain) inhibitor subunit 1 (PI31)	Q92530	13	Cytoplasm	other	Diagnosis		9491	228769
PTBP1	AA407203,AL033359,HNRNP-I,HNRPI,MGC10830,MGC8461,pPTB,PTB,PTB-1,PTB-T,PTB2,PTB3,PTB4,Pybp,Pybp1,Pybp2	polypyrimidine tract binding protein 1	P26599	7	Nucleus	enzyme			5725	19205	29497
PTPLAD1	4930523M17RIK,AW742319,B-IND1,FLJ90376,HACD3,HSPC121,MGC25483	protein tyrosine phosphatase-like A domain containing 1	Q9P035		Cytoplasm	other			51495	57874
PTPLB	6330408J20Rik,AI255777,AI481689,HACD2,LOC201562,Protein tyrosin phosphatase-like member b	protein tyrosine phosphatase-like (proline instead of catalytic arginine), member b	Q6Y1H2	10	Cytoplasm	phosphatase			201562	70757	288058
PTPN1	MGC93562,PROTEIN-TYROSINE PHOSPHATASE,PTP,PTP-1B,PTP-HA2,PTP1B ALPHA,PTP1BB,Ptpase 1,PTPASE 1B,PTPASE HA2	protein tyrosine phosphatase, non-receptor type 1	P18031	15	Cytoplasm	phosphatase	Prognosis		5770	19246	24697
PTRF	2310075E07RIK,AW546441,Cav-p60,CAVIN,cavin-1,CGL4,FKSG13,FLJ90031,MGC118550,TTF-I	polymerase I and transcript release factor	Q6NZI2	17	Nucleus	transcription regulator			284119	19285	287710
PTTG1	AW555095,C87862,EAP1,HPTTG,MGC126883,MGC138276,PDS1,Pituitary tumor transforming 1,PITUITARY TUMOR TRANSFORMING GENE PROTEIN1,PTTG,Pttg3,SECURIN,TUTR1	pituitary tumor-transforming 1	--		Nucleus	transcription regulator	Prognosis		9232	30939	64193
PVRL3	2610301B19Rik,3000002N23Rik,4921513D19Rik,AA407785,AU016832,AW538082,CD113,CDW113,DKFZP566B0846,FLJ90624,LOC100506575,NECTIN-3,PPR3,PRR3,PVRR3	poliovirus receptor-related 3	--	23	Plasma Membrane	other			25945	58998	288124
PYCR1	ARCL2B,MGC11688,P5C,P5CR,PIG45,PP222,PRO3,PYCR	pyrroline-5-carboxylate reductase 1	P32322		Cytoplasm	enzyme			5831	209027	287877
RAB10	Ac1075,AW107754,RAS-RELATED GTP-BINDING,Similar to rab10	RAB10, member RAS oncogene family	P61026		Cytoplasm	enzyme			10890	19325	50993
RAB1A	Ac2-048,DKFZp564B163,Gtbp,mKIAA3012,RAB1,Rab1p,Rab1r,YPT1	RAB1A, member RAS oncogene family	P62820	16	Cytoplasm	enzyme			5861	19324	81754
RAB2A	9330148M11Rik,C80220,LHX,RAB2	RAB2A, member RAS oncogene family	P61019	2	Cytoplasm	enzyme			5862	59021	65158
RAD52 (includes EG:19365)	Rad52yh	RAD52 homolog (S. cerevisiae)	P43351	13	Nucleus	other			5893	19365	297561
RALY	AI663842,HNRPCL2,Merc,MGC117312,P542,RNA binding protein Raly/Merc	RNA binding protein, autoantigenic (hnRNP-associated with lethal yellow homolog (mouse))	Q9UKM9		Nucleus	other			22913	19383	296301
RAN	ARA24,Gsp1,GTPase Ran,RANGTPASE,RAS-like, family 2, locus 9,Rasl2-9,TC4	RAN, member RAS oncogene family	P62826	2	Nucleus	enzyme			5901	19384	84509
RANBP2	A430087B05Rik,AI256741,ANE1,IIAE3,NUP358,RGD1560047,TRP1,TRP2	RAN binding protein 2	P49792	2	Nucleus	enzyme			5903	19386	294429
Rar	All Trans Retinoic Acid Receptor,RETINOIC ACID NUCLEAR RECEPTORS	--	--	20	Nucleus	group
RARA	ALPHA RAR,NR1B1,PLZF-RARα,RAR,RAR ALPHA,RAR ALPHA 1,RARα,RETINOIC ACID RECEPTOR ALPHA	retinoic acid receptor, alpha	P10276	5	Nucleus	ligand-dependent nuclear receptor	Diagnosis,Prognosis	etretinate, adapalene, arsenic trioxide, 13-cis-retinoic acid, tazarotene, acitretin, tretinoin, 9-cis-retinoic acid	5914	19401	24705
Ras	p21 Ras	--	--	13	Cytoplasm	group	Diagnosis,Efficacy,Prognosis,Response to Therapy
Ras homolog	GTPase Rho,Rho,RHO-GTPASE,Rho-like Gtpase	--	--	19	Cytoplasm	group
RB1	OSRC,p105,p105-Rb,p110 RB,pp110,PRB,RB,RB-ASSOCIATED,RETINOBLASTOMA	retinoblastoma 1	P06400	17	Nucleus	transcription regulator	Diagnosis,Efficacy,Prognosis,Unspecified Application		5925	19645	24708
Rb	pRb,Rb Tumor Suppressor	--	--	15	Nucleus	group
RBBP4	CAF-1 subunit C,CAF-I 48 kDa subunit,CAF1 P48,CAF1/p48,LOC685491,mRbAp48,NURF55,RBAP48	retinoblastoma binding protein 4	Q09028	4	Nucleus	enzyme			5928	19646	313048
RBM14	1300007E16Rik,COAA,COACTIVATOR ACTIVATOR,DKFZp779J0927,MGC15912,MGC31756,p16,p16K,PSP2,SIP,Sytip,SYTIP1,TMEM137	RNA binding motif protein 14	Q96PK6	9	Nucleus	transcription regulator			10432	56275	170900
RBM39	1500012C14Rik,2310040E03Rik,B330012G18RIK,C79248,CAPER,CAPERalpha,CC1.3,DKFZp781C0423,FLJ44170,FSAP59,HCC1,MGC109490,R75070,RNPC2,Similar to i55595 splicing factor	RNA binding motif protein 39	Q14498	14	Nucleus	transcription regulator			9584	170791	362251
RCC2	2610510H01RIK,2610529N02Rik,AA536646,AA675016,DKFZp762N0610,Image:3154023,KIAA1470,mKIAA1470,RGD1309986,TD-60	regulator of chromosome condensation 2	Q9P258	23	Nucleus	other			55920	108911	298594
RCOR1	5730409O11,6720480E22Rik,AU042633,COREST,D12WSU95E,KIAA0071,mKIAA0071,RCOR	REST corepressor 1	Q9UKL0	12	Nucleus	transcription regulator			23186	217864	314458
RDH11	2610319N22Rik,AI428145,Androgen-regulated short-chain dehydrogenase/reductase 1,ARSDR1,AU045252,C85936,CGI-82,FLJ32633,HCBP12,M42C60,MDT1,PSDR1,RALR1,SCALD,SDR7C1,Ube-1c,UBE-1c1	retinol dehydrogenase 11 (all-trans/9-cis/11-cis)	Q8TC12	9	Cytoplasm	enzyme			51109	17252	362757
REEP5	AI324241,AU022809,AW495741,C5orf18,D5S346,DELETED IN POLYPOSIS,DP1,DP1/TB2,MGC70440,R74856,TB2,TB2/DP1,YOP1	receptor accessory protein 5	Q00765	2	Extracellular Space	transporter			7905	13476	364838
REL	C-REL,V-REL	v-rel reticuloendotheliosis viral oncogene homolog (avian)	--		Nucleus	transcription regulator			5966	19696	305584
RERE	1110033A15RIK,AI414665,ARG,ARP,ATN1L,ATR2,AW742570,DNB1,FLJ38775,KIAA0458,mKIAA0458	arginine-glutamic acid dipeptide (RE) repeats	Q9P2R6	12	Nucleus	other	Unspecified Application		473	68703
Retinoic acid-RAR-RXR		--	--	12	Nucleus	complex
Rho gdi	Gdi,Rabgdi,RHO GUANINE NUCLEOTIDE DISSOCIATION INHIBITOR	--	--	16	unknown	group
Ribosomal 40s subunit	40s,40S ribosomal subunit,40S RIBOSOME	--	--	5	Cytoplasm	complex
RIF1 (includes EG:295602)	5730435J01Rik,6530403D07RIK,AU016181,AW549474,BLAP250,D2ERTD145E,DKFZp434D1026,DKFZP434D193,DKFZp781N1478,FLJ10599,FLJ12870,RGD1562474	RAP1 interacting factor homolog (yeast)	Q5UIP0	8	Nucleus	other			55183	51869	295602
RNA polymerase I	RNA Pol-I,SL1	--	--	17	Nucleus	complex
RNA polymerase iii	RNA Pol-III	--	--	24	Nucleus	complex
RNF2	AI326319,AI450156,AU019207,BAP-1,DING,HIPI3,MGC114502,RING1B,RING2	ring finger protein 2	Q99496	4	Nucleus	transcription regulator			6045	19821	304850
RNF111	ARK,Arkadia,DKFZp313E0731,DKFZp686H1966,DKFZp761D081,FLJ38008	ring finger protein 111	Q6ZNA4	7	Nucleus	enzyme			54778	93836	300813
RORA	9530021D13RIK,DKFZp686M2414,LOC283666,MGC119326,MGC119329,nmf267,NR1F1,Nuclear receptor ror alpha 1 homolog,ROR Alpha,Ror gamma,ROR1,ROR2,ROR3,Rora1,RZR-ALPHA,RZRA,sg,staggerer,tmgc26	RAR-related orphan receptor A	P35398		Nucleus	ligand-dependent nuclear receptor			6095	19883	300807
RPL3	EG668219,F2,Gm16468,J1,L3,LOC100043000,LOC100045885,MGC103388,MGC104284,MGC72934,TARBP-B	ribosomal protein L3	P39023	3	Cytoplasm	other			6122	100043000|27367	300079
RPL5	DBA6,Gm15500,L5,MGC101934,MGC102309,MGC117339,MGC117998,MGC25420,MSTP030,OTTMUSG00000022843,RGD1564051,Ribosomal protein l1a,U21RNA	ribosomal protein L5	P46777	3	Cytoplasm	other			6125	100043295|100503670	501206
RPL6	60s ribosomal protein,EG432502,EG620213,EG627889,Gm5428,Gm6136,Gm6807,L6,MGC117949,MGC93267,Ribosomal protein l6,SHUJUN-2,TAXREB107,Trbp107,TXREB1	ribosomal protein L6	Q02878	3	Cytoplasm	other			6128	432502|627889|19988|620213
RPL7	humL7-1,L7,MGC102113,MGC117326,RIBOSOMAL PROTEIN L7,Rpl7a,Surf-3	ribosomal protein L7	P18124	3,23	Cytoplasm	transcription regulator			6129	19989	297755
RPL12	E430018F03,EG241053,Gm4957,L12,MGC102182,MGC102573,Rpl12-ps1	ribosomal protein L12	P30050	3	Cytoplasm	other			6136	241053	296644
RPL13	BBC1,Breast Basic Conserved,D16S444E,D16S44E,EG668182,FLJ27453,FLJ27454,FLJ38635,Gm9026,L13,MGC117342,MGC71373,Rl13	ribosomal protein L13	P26373	3	Cytoplasm	other			6137	668182	81765
RPL14	3100001N19RIK,60S ribosomal protein L14,AA407502,AL022816,CAG-ISL-7,CTG-B33,ENSMUSG00000046721,Gm9811,hRL14,L14,LOC100040970,LOC100046610,MGC88594,RL14	ribosomal protein L14	P50914	3	Cytoplasm	other			9045	67115|100040970	65043
RPL15	2510008H07Rik,EC45,FLJ26304,Gm4294,L15,MGC107261,MGC88603,RPL10,RPLY10,RPYL10	ribosomal protein L15	P61313	3	Cytoplasm	other			6138	100043209	245981
RPL17	ASI,FLJ18762,FLJ92089,L17,LOC100133240,MGC103289,MGC112577,MGC117162,MGC118163,PD-1,RPL23	ribosomal protein L17	P18621	3	Cytoplasm	other			6139	319195	291434
RPL18	L18,Rpl18a	ribosomal protein L18	Q07020	3	Cytoplasm	other			6141	19899	81766
RPL22	2700038K18Rik,EAP,HBP15,HBP15/L22,L22,Ribosomal protein L22	ribosomal protein L22	P35268	3	Nucleus	other			6146	19934	81768
RPL13A	1810026N22Rik,23-KD HIGHLY BASIC,L13A,MGC107571,Ribol13a,Ribosomal protein l13a,TSTA1,Tstap198-7,tum-antigen	ribosomal protein L13a	P40429	3	Cytoplasm	other			23521	22121	317646
RPL18A	2510019J09RIK,60 Ribosomal Protein L18a,L18A,MGC72957	ribosomal protein L18a	Q02543	3	Cytoplasm	other			6142	76808	290641
RPL26L1	ENSMUSG00000063754,FLJ46904,Gm10136,RGD1563840,RPL26P1	ribosomal protein L26-like 1	Q9UNX3	3	Cytoplasm	other			51121	672214	307636
RPL27A	EG665189,FLJ43464,Gm7536,L27',L27A,L29,MGC107695,MGC10850,MGC17878,MGC66730,MGC87238	ribosomal protein L27a	P46776	3	Nucleus	other			6157	665189|26451	293418
RPL7A	EG666669,EG668718,Gm16477,Gm8226,L7A,LOC677073,MGC103146,PLA-X,RGD1564370,Ribosomal protein l7a,SURF3,Surfeit 3,TRUP	ribosomal protein L7a	P62424	3	Nucleus	other			6130	27176|666669|677073	499457
RPLP0	36B4,ACIDIC RIBOSOMAL PHOSPHOPROTEIN P0,AEG8,ARBP,ARPP P0,EG667618,Gm8730,L10E,LP0,MGC107165,MGC107166,MGC111226,MGC88175,P0,PRLP0,RIBOSOMAL PHOSPHOPROTEIN P0,Rp0,RPP0	ribosomal protein, large, P0	P05388	3	Cytoplasm	other			6175	11837|667618	64205
RPN1	AU018702,D6Wsu137e,DKFZp686B16177,OST1,RBPH1,RIBI,Ribophorin,Ribophorin i,Ribophorin1	ribophorin I	P04843		Cytoplasm	enzyme			6184	103963	25596
RPS2	Cho-B,EG667279,ENSMUSG00000067946,Gm14583,Gm8553,LLREP3,MGC102851,MGC117344,MGC117345,MGC118037,MGC118038,OTTMUSG00000017346,Ribosomal protein s2,Rps2r1,RPS4,S2	ribosomal protein S2	P15880	5	Cytoplasm	other			6187	546298|667279|16898	83789
RPS3	40s ribosomal subunit,D7Ertd795e,FLJ26283,FLJ27450,MGC87870,S3,S3-40S	ribosomal protein S3	P23396	5	Cytoplasm	enzyme			6188	27050	140654
RPS6	Gm13654,MGC102571,MGC103209,OTTMUSG00000013244,pp33,RIBOSOMAL PROTEIN S6,S6,S6R	ribosomal protein S6	P62753	5	Cytoplasm	other	Response to Therapy		6194	20104|667739	29304
RPS7	DBA8,LOC497813,MGC188796,MGC72770,Rps7A,S7	ribosomal protein S7	P62081	5	Cytoplasm	other			6201	20115	29258
RPS8	ENSMUSG00000070446,Gm15501,MGC107577,OTTMUSG00000022847,S8	ribosomal protein S8	P62241	5	Cytoplasm	other			6202	20116|100040298	65136
RPS16	AA420385,AI317031,RGD1559743,RGD1561137,S16	ribosomal protein S16	P62249	5	Cytoplasm	other			6217	20055	316048|140655|366030
RPS18	D6S218E,H-2Ke3,HKE3,KE-3,MGC117351,MGC126835,MGC126837,MGC156545,Ribosomal protein s18,S18	ribosomal protein S18	P62269	5	Cytoplasm	other			6222	20084	294282
RPS27A	0610006J14Rik,CEP80,EG667035,Gm8430,LOC639567,RGD1564290,S27A,Uba52,UBA80,Ubb,UBC,UBCEP1,UBCEP80	ribosomal protein S27a	P62979	5	Cytoplasm	enzyme			6233	667035	498837
RPS3A	40S ribosomal protein S3a.12/1998,EG668144,ENSMUSG00000062611,FTE/S3A,FTE1,Gm10119,Gm9000,MFTL,MGC102469,MGC117914,MGC23240,Ribosomal protein s3a,S3A	ribosomal protein S3A	P61247	5	Cytoplasm	other			6189	20091|668144|100043780	29288
RPS6KA	p90RSK,Protease-Activated Kinase II,RSK,S6 kinase	--	--	24	Cytoplasm	group
RPSA	37LRP,40kDa Ribosomal,40S RIBOSOMAL PROTEIN SA,67LR,AL022858,LAMBR,LAMININ RECEPTOR,LAMININ RECEPTOR 1,Lamr,LAMR1,Lamrl1,LBP,LBP/p40,LPS-binding,LRP,LRP/LR,MGC117921,MGC118614,MLR,NEM/1CHD4,P40,P40-3,P40-8,SA,SA p40	ribosomal protein SA	P08865	5	Cytoplasm	translation regulator			3921	16785	29236
RRM2	AA407299,MGC113712,MGC116120,R2,Ribonucleoside-diphosphate reductase M2 subunit,Ribonucleotide reductase non-heme subunit,RIBONUCLEOTIDE REDUCTASE SMALL SUBUNIT,Rnr-r2,RNRII,RR2,RR2M	ribonucleotide reductase M2	P31350	23	Nucleus	enzyme	Diagnosis	gemcitabine, triapine, hydroxyurea, fludarabine phosphate	6241	20135	362720
RSF1 (includes EG:233532)	4832420A03RIK,C030033M12RIK,Gm164,HBXAP,MGC90806,p325,XAP8	remodeling and spacing factor 1	Q96T23	7	Nucleus	transcription regulator	Prognosis		51773	233532	308839
Rsk	P90-RSK	--	--	21	Cytoplasm	group
RSL1D1	2410005K20RIK,C76439,CATX11,CSIG,DKFZP564M182,L12,MGC138433,MGC142259,PBK1,UTP30,YH77E09	ribosomal L1 domain containing 1	O76021	23	Cytoplasm	other			26156	66409	302898
RUVBL1	2510009G06Rik,ECP54,INO80H,NMP238,PONTIN,PONTIN52,RVB1,TAP54 ALPHA,TAP54 BETA,TIH1,TIP49,TIP49A	RuvB-like 1 (E. coli)	Q9Y265	14	Nucleus	transcription regulator			8607	56505	65137
RUVBL2	CGI-46,ECP51,INO80J,MGC144733,MGC144734,mp47,P47,REPTIN,RuvB like DNA helicase,RUVB2,RVB2,TIH2,TIP48,TIP49B,UPAR MRNABP	RuvB-like 2 (E. coli)	Q9Y230	14	Nucleus	transcription regulator			10856	20174	292907
Rxr	Retinoid receptor	--	--	12	Nucleus	group
RXRA	9530071D11RIK,FLJ00280,FLJ00318,FLJ16020,FLJ16733,MGC102720,NR2B1,RETINOID X RECEPTOR ALPHA,RXR,RXR ALPHA,RXRalpha1,RXRα	retinoid X receptor, alpha	P19793	9	Nucleus	ligand-dependent nuclear receptor	Prognosis	bexarotene, tretinoin, 9-cis-retinoic acid	6256	20181	25271
S100A9	60B8AG,AW546964,BEE22,CAGB,calgranulin B,CFAG,CGLB,GAGB,L1AG,Leukocyte l1 complex heavy chain,LIAG,MAC387,MIF,MIGRATION INHIBITORY FACTOR RELATED PROTEIN 14,MRP14,NIF,P14	S100 calcium binding protein A9	P06702	24	Cytoplasm	other	Diagnosis,Unspecified Application		6280	20202	94195
SAA	A-saa,Amyloid A,SAA@,SERUM AMYLOID,Serum Amyloid A	--	--	21	Nucleus	group	Efficacy,Prognosis
SACM1L	DKFZp686A0231,KIAA0851,mKIAA0851,SAC1,Sac1p	SAC1 suppressor of actin mutations 1-like (yeast)	Q9NTJ5	21	Cytoplasm	phosphatase			22908	83493	116482
SAFB2	AA389433,AI255170,KIAA0138,mKIAA0138	scaffold attachment factor B2	Q14151	6	Cytoplasm	other			9667	224902
SAFB	3110021E02RIK,5330423C17RIK,AU018122,D18386,DKFZp779C1727,E130307D12,HAP,HET,SAF-B1,Scaffold Attachment Factor B	scaffold attachment factor B	Q15424	21	Nucleus	other			6294	224903	64196
SALL1	HSAL1,Msal-3,SAL1,TBS,ZNF794	sal-like 1 (Drosophila)	Q9NSC2	8	Nucleus	transcription regulator			6299	58198	307740
SAP18	2HOR0202,C530046K05Rik,D11Ertd539e,EMegR4,ENSMUSG00000061104,Gm10094,MGC125107,MGC27131,SAP18P,Sinbp1	Sin3A-associated protein, 18kDa	O00422	4	Nucleus	transcription regulator	Unspecified Application		10284	100041953|20220	290284
SAP130	2610304F09RIK,6720406D06,FLJ12761,RGD1311657	Sin3A-associated protein, 130kDa	Q9H0E3	4	Nucleus	transcription regulator			79595	269003	307527
SARS	FLJ36399,MGC72629,SARS1,Serine--tRNA ligase,SERRS,SERS,SRS,Strs	seryl-tRNA synthetase	P49591	2	Cytoplasm	enzyme			6301	20226	266975
SART1	Ara1,HAF,HOMS1,MGC2038,Salt1,SART1259,SNRNP110,Snu66,SPF107,SSCA1,U5-110K	squamous cell carcinoma antigen recognized by T cells	O43290		Nucleus	other			9092	20227	29678
SART3	AU045857,DSAP1,KIAA0156,MGC138188,mKIAA0156,P100,p110,p110(nrb),RP11-13G14,TIP110	squamous cell carcinoma antigen recognized by T cells 3	Q15020	9	Nucleus	other			9733	53890	304582
SATB1	2610306G12Rik,AW413156	SATB homeobox 1	Q01826	3	Nucleus	transcription regulator			6304	20230	316164
SATB2	FLJ21474,FLJ32076,KIAA1034,LOC212712,MGC119474,MGC119477,mKIAA1034,RGD1562369	SATB homeobox 2	Q9UPW6	7	Nucleus	transcription regulator			23314	212712	501145
SDHA (includes EG:157074)	1500032O14RIK,2310034D06Rik,4921513A11,C81073,CMD1GG,FP,PGL5,SDH1,SDH2,SDH70,SDHF,Succinate dehydrogenase complex, subunit A flavoprotein (Fp),Succinate-ubiquinone oxidoreductase 70-kda subunit	succinate dehydrogenase complex, subunit A, flavoprotein (Fp)	P31040	6	Cytoplasm	enzyme			6389	66945	157074
SEC11A	1810012E07Rik,Endopeptidase SP18,Microsomal signal peptidase 18 kda,SEC11L1,sid2895,Sid2895p,SPC18,SPCS4A	SEC11 homolog A (S. cerevisiae)	P67812	9	Cytoplasm	peptidase			23478	56529	65166
SEC63 (includes EG:11231)	5730478J10Rik,AI649014,AW319215,DNAJC23,ERdj2,PRO2507,SEC63L,SEC63P	SEC63 homolog (S. cerevisiae)	Q9UGP8	15	Cytoplasm	transporter			11231	140740	309858
SEL1L	AW493766,IBD2,KIAA4137,mKIAA4137,PRO1063,SEL1,SEL1-LIKE,SEL1H,SEL1L1	sel-1 suppressor of lin-12-like (C. elegans)	Q9UBV2	11	Cytoplasm	other			6400	20338	314352
SENP1	2310046A20Rik,D15Ertd528e,E330036L07RIK,MGC27975,SuPr-2	SUMO1/sentrin specific peptidase 1	Q9P0U3	4	Nucleus	peptidase			29843	223870	300193
SERPINB1	1190005M04Rik,AI325983,EI,EIA,ELANH2,LEI,LEUKOCYTE ELASTASE INHIBITOR,M/NEI,MGC112650,MGC129309,MNE1,MNEI,MONOCYTE/NEUTROPHIL ELASTASE INHIBITOR,PI2,Serpinb1a	serpin peptidase inhibitor, clade B (ovalbumin), member 1	P30740		Cytoplasm	other			1992	66222	291091
SF3B1	2810001M05Rik,AA409119,Hsh155,PRP10,PRPF10,SAP155,SF3b155,Splicing factor 3b,TA-8,Targ4	splicing factor 3b, subunit 1, 155kDa	O75533		Nucleus	other			23451	81898	84486
SF3B4	Hsh49,MGC10828,MGC36369,MGC36564,SAP49,SF3b49,SF3b50,SPLICING FACTOR 3B SUBUNIT4	splicing factor 3b, subunit 4, 49kDa	Q15427	4	Nucleus	other			10262	107701	295270
SFPQ	1110004P21RIK,2810416M14Rik,5730453G22RIK,9030402K04Rik,AU021830,D4Ertd314e,Gm12940,LOC100504686,LOC252855,MGC101933,MGC112723,Myoblast Antigen 24.1D5,Nono,OTTMUSG00000009329,POMP100,PSF,Ptb associated splicing factor,REP1	splicing factor proline/glutamine-rich	P23246	5	Nucleus	other			6421	71514	252855
SGPL1	AI428538,D10Xrf456,FLJ13811,KIAA1252,S1P LYASE,S1PL,SPGL1,sphingosine-1-phosphate lyase,SPL	sphingosine-1-phosphate lyase 1	O95470		Cytoplasm	enzyme			8879	20397	286896
Shc	SHC transforming protein	--	--	19	Cytoplasm	group
SHMT1	AI324848,AI385541,C81125,CSHMT,Hydroxymethyltransferase,LRRGT00032,MGC15229,MGC24556,mSHMT,mshmt1,mshmt2,Serine Hydroxymethyl Transferase,SHMT	serine hydroxymethyltransferase 1 (soluble)	P34896		Cytoplasm	enzyme			6470	20425	287379
Sin3A	Sin3A Complex	--	--	4	Nucleus	complex
SIRT1	AA673258,MGC150273,Sir2,SIR2 ALPHA,SIR2A,SIR2L1,SIRT	sirtuin 1	Q96EB6	11	Nucleus	transcription regulator			23411	93759	309757
SKIL	9130011J04RIK,SKIR,SNO,sno-dE3,SnoA,SnoI,SNON,SnoN2	SKI-like oncogene	P12757	13	Nucleus	transcription regulator			6498	20482	114208
SLC1A2	1700091C19Rik,2900019G14RIK,AI159670,EAAT2,Glt,GLT-1,Glutamate-aspartate transporter,MGLT1	solute carrier family 1 (glial high affinity glutamate transporter), member 2	P43004	15	Plasma Membrane	transporter		riluzole	6506	20511	29482
SLC25A3	5730556H19Rik,OK/SW-cl.48,PHC,PTP	solute carrier family 25 (mitochondrial carrier; phosphate carrier), member 3	Q00325	11	Cytoplasm	transporter			5250	18674	245959
SLC25A5	2F1,AAC2,ADP/ATP CARRIER,ANC2,ANT2,EG433923,MGC101927,RGD1560896,Slc25a6,T2,T3	solute carrier family 25 (mitochondrial carrier; adenine nucleotide translocator), member 5	P05141	11	Cytoplasm	transporter			292	433923	498885
SLC25A6	AAC3,Adenine nucleotide translocator 2,Adp, atp carrier,ADP/ATP TRANSLOCASE,ANC3,Ant2,ANT3,ANT3Y,Fibroblast ATP/ADP Carrier,MGC101927,MGC17525,Slc25a5	solute carrier family 25 (mitochondrial carrier; adenine nucleotide translocator), member 6	P12236	11	Cytoplasm	transporter			293	11740	25176
SLC25A12	2610002D09Rik,AGC1,AI839531,ARALAR,ARALAR1,B230107K20RIK,BB129864,RGD1561141	solute carrier family 25 (mitochondrial carrier, Aralar), member 12	O75746	6	Cytoplasm	transporter			8604	78830	362145
SLC27A2	ACSVL1,FACVL1,FATP2,hFACVL1,HsT17226,MGC93337,Vlac,VLACS,Vlcas,VLCS	solute carrier family 27 (fatty acid transporter), member 2	O14975	6	Cytoplasm	transporter			11001	26458	65192
SLC30A3	ZNT3	solute carrier family 30 (zinc transporter), member 3	--	25	Plasma Membrane	transporter			7781	22784	366568
SLC30A7	1810059J10Rik,2610034N15Rik,4833428C12Rik,AI467242,DKFZp686M0368,ZNT7,ZnTL2	solute carrier family 30 (zinc transporter), member 7	Q8NEW0		Cytoplasm	transporter			148867	66500	310801
SLC39A6	Ermelin,LIV-1	solute carrier family 39 (zinc transporter), member 6	Q13433	15	Plasma Membrane	transporter	Disease Progression		25800	106957	291733
SLC3A2	4F2,4F2 heavy chain,4F2HC,4T2HC,AI314110,CD98,CD98 HEAVY CHAIN,CD98HC,FRP1,Ly-10,Ly-m10,MDU1,Mgp-2hc,NACAE	solute carrier family 3 (activators of dibasic and neutral amino acid transport), member 2	P08195	19	Plasma Membrane	transporter			6520	17254	50567
SLK	9A2,AV021402,AW411554,bA16H23.1,Etk4,KIAA0204,LOSK,MGC133067,mKIAA0204,mSLK,SE20-9,SMAK,STK2	STE20-like kinase	Q9H2G2		Nucleus	kinase			9748	20874	54308
SMAD4	AW743858,D18Wsu70e,DPC4,JIP,MADH4,Smaug1	SMAD family member 4	Q13485	19	Nucleus	transcription regulator	Prognosis		4089	17128	50554
Smad		--	--	13	Nucleus	complex
Smad2/3		--	--	20	Cytoplasm	group
SMARCA5	4933427E24Rik,D030040M08RIK,D330027N15Rik,hISWI,hSNF2H,ISWI,MommeD4,SNF2H,SNFA5,WCRF135	SWI/SNF related, matrix associated, actin dependent regulator of chromatin, subfamily a, member 5	O60264	7	Nucleus	transcription regulator			8467	93762	307766
SMARCC2	5930405J04RIK,BAF170,CRACC2,DKFZp313D0632,LOC685179,Rsc8	SWI/SNF related, matrix associated, actin dependent regulator of chromatin, subfamily c, member 2	Q8TAQ2	12	Nucleus	transcription regulator			6601	68094	685179
SMARCE1	2810417B20Rik,5830412H02RIK,9030408N19Rik,Baf27,BAF57,FLJ35648,RGD1304726	SWI/SNF related, matrix associated, actin dependent regulator of chromatin, subfamily e, member 1	Q969G3	12	Nucleus	transcription regulator			6605	57376	303518
SMC2	5730502P04Rik,AI255214,AW545314,CAP-E,Fin16,FLJ10093,HCAP-E,SMC2L1	structural maintenance of chromosomes 2	O95347	14	Nucleus	transporter			10592	14211	362519
SMC3	BAM,BAMACAN,BMH,CDLS3,CSPG6,HCAP,MMIP1,SMC3L1,SmcD	structural maintenance of chromosomes 3	Q9UQE7	14	Nucleus	other			9126	13006	29486
SMC4	2500002A22Rik,C79747,CAP-C,DKFZP434F205,HCAP-C,MGC125078,SMC4L1	structural maintenance of chromosomes 4	Q9NTJ3	6	Nucleus	transporter			10051	70099	295107
SMC		--	--	14	Nucleus	group
SMC1A	5830426I24Rik,CDLS2,DKFZp686L19178,DXS423E,KIAA0178,MGC138332,mKIAA0178,SB1.8,SMC1,SMC1 BETA,SMC1alpha,SMC1L1,SMCB,STRUCTURAL MAINTENANCE OF CHROMOSOMES 1	structural maintenance of chromosomes 1A	Q14683	14	Nucleus	transporter			8243	24061	63996
SMPD4	4122402O22RIK,FLJ20297,FLJ20756,KIAA1418,mKIAA1418,NET13,NSMASE-3,RGD1310674	sphingomyelin phosphodiesterase 4, neutral membrane (neutral sphingomyelinase-3)	Q9NXE4		Cytoplasm	enzyme			55627	77626	303790
SNCA	AD AMYLOID,ALPHA SYNUCLEIN,ALPHASYN,ASYN,MGC105443,MGC110988,NACP,PARK1,PARK4,PD1,SYNUCLEIN ALPHA,Synuclein-α	synuclein, alpha (non A4 component of amyloid precursor)	P37840	13	Cytoplasm	other	Diagnosis,Disease Progression,Prognosis		6622	20617	29219
SND1	AL033314,Loc56463,P100,P100-coactivator,SND p102,TDRD11,U83883	staphylococcal nuclease and tudor domain containing 1	Q7KZF4	18	Nucleus	enzyme	Unspecified Application		27044	56463	64635
SNIP1	2410133M08RIK,dJ423B22.2,FLJ12553,RP3-423B22.3	Smad nuclear interacting protein 1	Q8TAD8	1	Nucleus	other			79753	76793	313588
SNRNP70	2700022N21Rik,3200002N22Rik,AI325098,R74807,RNPU1Z,Rnulp70,RPU1,Snp1,SNRP70,Srnp70,U1 SNRNP 70K,U1 SNRNP70,U1-70,U1-70K,U1AP,U1RNP	small nuclear ribonucleoprotein 70kDa (U1)	P08621	11	Nucleus	other			6625	20637	361574
SNRNP200	A330064G03RIK,ASCC3L1,BC011390,BRR2,FLJ11521,HELIC2,KIAA0788,RP33,U5 snRNP-specific 200kD,U5-200,U5-200-KD	small nuclear ribonucleoprotein 200kDa (U5)	O75643		Nucleus	enzyme			23020	320632
SNRPD2	1810009A06Rik,MGC62953,SMD2,snRNP D2,SNRNP SM D2,SNRPD1	small nuclear ribonucleoprotein D2 polypeptide 16.5kDa	P62316	4	Nucleus	other			6633	107686	680309
SOD1	ALS,ALS1,B430204E11Rik,CU/ZN-SOD,CUZNSOD,czSOD,EG667310,homodimer,hSod1,Ipo-1,IPOA,MGC107553,SOD,SOD1L1,SODC	superoxide dismutase 1, soluble	P00441	11	Cytoplasm	enzyme	Unspecified Application		6647	667310|20655	24786
SOX2	ANOP3,lcc,MCOPS3,MGC2413,RGD1565646,Sry-2,ysb	SRY (sex determining region Y)-box 2	--		Nucleus	transcription regulator	Diagnosis,Prognosis		6657	20674	499593
SOX3	GHDX,MRGH,PHP,PHPX,SOXB	SRY (sex determining region Y)-box 3	--		Nucleus	transcription regulator	Prognosis		6658	20675	367950
SOX6	AI987981,HSSOX6,SOXD,Soxlz	SRY (sex determining region Y)-box 6	P35712		Nucleus	transcription regulator			55553	20679	293165
SOX10	DOM,MGC15649,PCWH,Sox21,WS2E,WS4,WS4C	SRY (sex determining region Y)-box 10	P56693		Nucleus	transcription regulator			6663	20665	29361
SOX18	AI385749,HLTS,Ra,Ragl	SRY (sex determining region Y)-box 18	--		Nucleus	transcription regulator			54345	20672	311723
SOX2-OCT4-NANOG		--	--	24	Nucleus	complex
SP1	1110003E12RIK,AA450830,AI845540,Sp1 (trans spliced isoform),SP1-1,Trans-acting transcription factor 1	Sp1 transcription factor	P08047	19	Nucleus	transcription regulator			6667	20683	24790
SP3	D130027J01RIK,DKFZp686O1631,MGC105187,SPR2	Sp3 transcription factor	Q02447	12	Nucleus	transcription regulator			6670	20687	367846
SPEN	HIAA0929,KIAA0929,MINT,mKIAA0929,RBM15C,RP1-134O19.1,SHARP	spen homolog, transcriptional regulator (Drosophila)	Q96T58		Nucleus	transcription regulator			23013	56381	365981
SPI1 (includes EG:20375)	Dis-1,OF,PU.1,SFPI1,SPI-A,Tcfpu1,Tfpu.1	spleen focus forming virus (SFFV) proviral integration oncogene spi1	--		Nucleus	transcription regulator			6688	20375	366126
SPTAN1	(ALPHA)II-SPECTRIN,2610027H02Rik,A2a,Alpha fodrin,ALPHA SPECTRIN,ALPHA SPECTRIN 2,Alpha-spectorin,AlphaII spectrin,EIEE5,FLJ17738,FLJ44613,Fodrin,IPF,NEAS,Spectrin alpha 2,SPNA2,SPTA2	spectrin, alpha, non-erythrocytic 1 (alpha-fodrin)	Q13813	15	Plasma Membrane	other			6709	20740	64159
SPTBN1	9930031C03Rik,AL033301,Beta fodrin,BETA II SPECTRIN,betaSpII,ELF,ELF1,Elf2,ELF3,KIAA4049,mKIAA4049,SPECTRIN BETA1,Spectrin Beta2,Spnb1,SPNB2,SPTB2	spectrin, beta, non-erythrocytic 1	Q01082	2	Plasma Membrane	other			6711	20742	305614
SRC	SFK,SRC KINASE,SRC TYROSINE KINASE,TRK	--	--	19	Cytoplasm	group
SREBF1	ADD-1,bHLHd1,D630008H06,S14,SREBP-1,SREBP-1a,STEROL RESPONSE ELEMENT	sterol regulatory element binding transcription factor 1	P36956	12	Nucleus	transcription regulator	Diagnosis		6720	20787	78968
SREBF2	AI608257,bHLHd2,MGC124823,RGD:728903,Srebf2 retired,SREBP-2,SREBP2gc,STEROL REGULATORY ELEMENT BINDING PROTEIN 2	sterol regulatory element binding transcription factor 2	Q12772	12	Nucleus	transcription regulator			6721	20788	300095
SRF	AW049942,AW240594,MCM1,p67SRF,RGD1559787,Sfr	serum response factor (c-fos serum response element-binding transcription factor)	P11831	9	Nucleus	transcription regulator			6722	20807	501099
SRF-ELK1	SRF-SRF-ELK1	--	--	20	Nucleus	complex
SRP72 (includes EG:327335)	5730576P14Rik,AI132477,BC019196,C77589	signal recognition particle 72kDa	O76094	11	Nucleus	kinase			6731	66661	498351
SRPK1	AU017960,MGC116186,SFRSK1,SR Protein Kinase 1	SRSF protein kinase 1	Q96SB4	2	Nucleus	kinase			6732	20815	361811
SRSF2	D11Wsu175e,Htra2-beta,Irebf2,MGC73009,MRF-1,PR264,SC-35,Sfrs10,SFRS2,SFRS2A,SPLICING FACTOR, ARGININE/SERINE-RICH 2,SRp30b,Tra2-B1,TRA2B	serine/arginine-rich splicing factor 2	--		Nucleus	transcription regulator			6427	20382	494445
SSB	LA,LA ANTIGEN,LARP3,Lupus la protein homolog,MGC118101,MGC93380,SSB-48	Sjogren syndrome antigen B (autoantigen La)	P05455	24	Nucleus	enzyme			6741	20823	81783
SSR3	0610038P07RIK,AL022999,AU022074,AW553833,Signal sequence receptor gamma subunit,Trap gamma,TRAP-complex gamma subunit,TRAPG	signal sequence receptor, gamma (translocon-associated protein gamma)	Q9UNL2	25	Cytoplasm	other			6747	67437	81784
SSR4	AW743063,C78062,SIGNAL SEQUENCE RECEPTOR DELTA,translocon-associated protein delta,Trap,TRAPD	signal sequence receptor, delta	P51571	11	Cytoplasm	other			6748	20832	29435
SSRP1	C81323,FACT,FACT80,Hmg1-rs1,Hmgi-rs3,Hmgox,MGC94298,PREIIBF,T160	structure specific recognition protein 1	Q08945	13	Nucleus	other			6749	20833	81785
ST3GAL4	2,3-Alpha Sialyltransferase,Alpha-2,3-sialyltransferase,Beta-galactosidase alpha-2,3-sialytransferase,CGS23,FLJ11867,FLJ46764,LOC100129068,NANTA3,SAT3,SIAT4,SIAT4C,ST3GAL IV,STZ	ST3 beta-galactoside alpha-2,3-sialyltransferase 4	--	23	Cytoplasm	enzyme			6484	20443	363040
STAG2	9230105L23Rik,B230112I07Rik,bA517O1.1,DKFZp686P168,DKFZp781H1753,FLJ25871,RGD1562042,SA-2,SAP2,SCC3B,Stromal antigen 2	stromal antigen 2	Q8N3U4	14	Nucleus	other			10735	20843	313304
STAT1	2010005J02Rik,AA408197,CANDF7,DKFZp686B04100,ISGF-3,p91,STAT1 ALPHA,Stat1 beta,Stat1 p91,STAT91,TRANSCRIPTION FACTOR SIGNAL TRANSDUCER AND ACTIVATOR	signal transducer and activator of transcription 1, 91kDa	P42224	22	Nucleus	transcription regulator	Diagnosis,Efficacy,Prognosis		6772	20846	25124
STAT3	1110034C02Rik,acute-phase response factor,APRF,AW109958,FLJ20882,HIES,MGC128731,MGC16063,MGC93551,Stat3 alpha isoform,Stat3 beta isoform,Stat3 delta,Stat3 protein	signal transducer and activator of transcription 3 (acute-phase response factor)	P40763	22	Nucleus	transcription regulator	Diagnosis,Efficacy,Prognosis		6774	20848	25125
STAT		--	--	22	Nucleus	group
Stat1-Stat2		--	--	22	Nucleus	complex
Stat1-Stat3		--	--	4	Cytoplasm	complex
STAT1/3/5	STAT1,3,5	--	--	22	Cytoplasm	group
STAT1/3/5/6		--	--	22	Cytoplasm	group
STAT5A	AA959963,MGF,pp95,STAT5,STAT5 ALPHA,STAT5A/MGF,STATA5	signal transducer and activator of transcription 5A	P42229	15	Nucleus	transcription regulator			6776	20850	24918
STAT5B	STAT5	signal transducer and activator of transcription 5B	--		Nucleus	transcription regulator			6777	20851	25126
STAU1	5830401L18Rik,AW549911,C85792,FLJ25010,MGC124588,STAU,Staufen	staufen, RNA binding protein, homolog 1 (Drosophila)	O95793	5	Cytoplasm	transporter			6780	20853	84496
STIM1	D11S4896E,GOK,SIM,STIM1L	stromal interaction molecule 1	Q13586	17	Plasma Membrane	other			6786	20866	361618
STT3A	AA408947,BB081708,FLJ27038,ITM1,MGC188229,MGC9042,RGD1565793,TMC	STT3, subunit of the oligosaccharyltransferase complex, homolog A (S. cerevisiae)	P46977	23	Plasma Membrane	enzyme			3703	16430	500972
SUMO2	Gfrp,Gm12335,HSMT3,LOC100048458,MGC117191,MGC72702,MGC93211,OTTMUSG00000006192,SENTRIN2,Smt3A,SMT3B,SMT3H2,SUMO3	SMT3 suppressor of mif two 3 homolog 2 (S. cerevisiae)	P61956	2	Nucleus	other			6613	100043429	690244
SUMO3	2810014B19Rik,AA409334,AW121497,AW536077,D10Ertd345e,SENTRIN3,SMT3A,Smt3B,SMT3H1	SMT3 suppressor of mif two 3 homolog 3 (S. cerevisiae)	P55854	2	Nucleus	other			6612	20610	499417
SUN2	AI551766,B230369L08Rik,C030011B15,FRIGG,KIAA0668,MGC133055,MGC133056,RGD1563141,UNC84B	Sad1 and UNC84 domain containing 2	Q9UH99	2	Nucleus	other			25777	223697	315135
SYMPK	1500016F02RIK,4632415H16RIK,AA125406,AI449890,FLJ27092,Hfn3g,SPK,SYM,Symplekin	symplekin	Q92797	25	Cytoplasm	other			8189	68188	292683
SYNCRIP	2610109K23Rik,4632417O19Rik,Ab2-339,dJ3J17.2,FLJ31626,GRY-RBP,hnRNP-Q,HNRPQ,HNRPQ1,NS1-associated protein 1,NSAP1,Nsap1l,PP68	synaptotagmin binding, cytoplasmic RNA interacting protein	O60506	5	Nucleus	other			10492	56403	363113
SYNE2	6820443O06RIK,AW546258,D12Ertd777e,DKFZp434H2235,DKFZp686E01115,DKFZp686H1931,EDMD5,FLJ11014,FLJ43727,FLJ45710,FLJ46790,KIAA1011,MGC96690,mKIAA1011,NESP2G,Nesprin-2,NUA,NUANCE,RGD1305248,TROPH	spectrin repeat containing, nuclear envelope 2	Q8WXH0	2	Nucleus	other			23224	319565	299151
T3-TR-RXR		--	--	20	Nucleus	complex
TAF5	6330528C20RIK,AV117817,TAF2D,TAFII100,TAFII90,Tata box binding protein associated factor, 100kd	TAF5 RNA polymerase II, TATA box binding protein (TBP)-associated factor, 100kDa	Q15542	19	Nucleus	transcription regulator			6877	226182	294018
TAF12 (includes EG:386637)	2810422D08Rik,AW557038,TAF15,TAF2J,TAFII15,TAFII20	TAF12 RNA polymerase II, TATA box binding protein (TBP)-associated factor, 20kDa	Q16514	19	Nucleus	transcription regulator			6883	66464
TAF2 (includes EG:170844)	4732460C16RIK,AI425886,CIF150,TAF2B,TAFII,TAFII-150,TAFIIB	TAF2 RNA polymerase II, TATA box binding protein (TBP)-associated factor, 150kDa	Q6P1X5	19	Nucleus	transcription regulator			6873	319944	170844
TALDO1	TAL,TAL-H,TALDOR,Transaldolase	transaldolase 1	P37837		Cytoplasm	enzyme			6888	21351	83688
TBL1X	5330429M20,EBI,RGD1563868,SMAP55,TBL1	transducin (beta)-like 1X-linked	O60907	4	Nucleus	transcription regulator			6907	21372	302711
TBL1XR1	8030499H02Rik,A630076E03RIK,AW539987,C21,C230089I12Rik,DC42,FLJ12894,IRA1,RGD1560053,TBLR1,TBLXR1	transducin (beta)-like 1 X-linked receptor 1	Q9BZK7	4	Nucleus	transcription regulator			79718	81004	365755
TBX1	CAFS,CTHM,DGCR,DGS,DORV,TBX1C,TGA,VCFS	T-box 1	O43435	16	Nucleus	transcription regulator			6899	21380	360737
TBX2	FLJ10169,THROMBOXANE B2	T-box 2	--		Nucleus	transcription regulator			6909	21385	303398
TBX3	D5Ertd189e,LOC100047200,TBX3-ISO,UMS,XHL	T-box 3	--		Nucleus	transcription regulator			6926	21386	353305
TBX22	CLPA,CPX,D230020M15Rik,dJ795G23.1,TBOX22,TBXX	T-box 22	Q9Y458	25	Nucleus	transcription regulator			50945	245572	302369
TCERG1	2410022J09Rik,2900090C16Rik,AI428505,CA150,CA150b,FBP23,FBP28,MGC133200,p144,TAF2S,Urn1	transcription elongation regulator 1	O14776	4	Nucleus	transcription regulator			10915	56070	307474
TCF3	A1,AA408400,ALF2,AW209082,bHLHb21,E12,E12/E47,E2-5,E2A,E47,ITF1,ME2,MGC129647,MGC129648,PAN1,Pan2,Putative transcription factor of the insulin gene,TCF3 isoform 1,TCFE2A,TRANSCRIPTION FACTOR 3,VDIR	transcription factor 3 (E2A immunoglobulin enhancer binding factors E12/E47)	--		Nucleus	transcription regulator	Unspecified Application		6929	21423	171046
TCOF1	AA408847,AW209012,MFD1,TCS1,treacle	Treacher Collins-Franceschetti syndrome 1	Q13428	6	Nucleus	transporter			6949	21453	291571
TCP1	AI528772,c-cpn,CCT,CCT ALPHA,CCT1,CCTa,D6S230E,p63,T complex protein 1,T-COMPLEX PROTEIN 1, ALPHA SUBUNIT,TCP1-ALPHA,Tp63,TRIC	t-complex 1	P17987	10	Cytoplasm	other			6950	21454	24818
TCR	T-cell receptor,TCR protein	--	--	3	Plasma Membrane	complex
TFAM	AI661103,Hmgts,MtTF1,MTTFA,TCF6,TCF6L1,TCF6L2,TCF6L3,Tfa,tsHMG	transcription factor A, mitochondrial	--		Cytoplasm	transcription regulator	Prognosis		7019	21780	83474
TFAP2A	activating enhancer-binding protein 2 alpha,Activator protein-2,AP 2A,AP-2,AP-2ALPHA,AP2B,AP2TF,BOFS,CUP,FLJ51761,TCFAP2A,TFAP2	transcription factor AP-2 alpha (activating enhancer binding protein 2 alpha)	--		Nucleus	transcription regulator	Diagnosis,Prognosis		7020	21418	306862
TFAP2C	AA409384,AP-2.2,AP-2G,AP-GAMMA,AP2-GAMMA,ERF1,hAP-2g,STRA2,TCFAP2C,TFAP2G	transcription factor AP-2 gamma (activating enhancer binding protein 2 gamma)	Q92754	24	Nucleus	transcription regulator			7022	21420	362280
TFCP2	ALPHA CP2,Alpha-globin transcription factor cp2,CP-2,D230015P20RIK,LBP-1C,LBP-1d,LBP1,LSF,LSF1D,MGC187831,SEF,TCFCP2,TFCP2C,UBP-1	transcription factor CP2	--		Nucleus	transcription regulator			7024	21422	315309
TFDP2	1110029I05RIK,A330080J22RIK,DKFZp313O196,DP-2,DP-3,FLJ39131,Tcfdp2	transcription factor Dp-2 (E2F dimerization partner 2)	--		Nucleus	transcription regulator			7029	211586	300947
TFEC	BB107417,bHLHe34,hTFEC-L,MGC107474,TCFEC,TFEC-L	transcription factor EC	--		Nucleus	transcription regulator			22797	21426	26296
TFRC	2610028K12Rik,AI195355,AI426448,AU015758,CD71,E430033M20Rik,Mtvr-1,p90,T9,TFNR,TFR,TFR1,TR,TRANSFERRIN RECEPTOR,TRANSFERRIN RECEPTOR 1,TRFR	transferrin receptor (p90, CD71)	P02786	11	Plasma Membrane	transporter	Diagnosis		7037	22042	64678
TH2 Cytokine	TH2-SPECIFIC CYTOKINES,TH2-TYPE CYTOKINE	--	--	21	unknown	group
THOC1	3110002N20Rik,AW107452,HPR1,LRRGT00070,MGC28284,NMP-84,P84,P84N5	THO complex 1	Q96FV9	6	Nucleus	transcription regulator	Prognosis		9984	225160	291797
THRA	6430529J03Rik,AR7,AW259572,C-erbA alpha,c-ERBA-1,EAR7,ERB-T-1,ERBA,ERBA1,MGC000261,MGC43240,NR1A1,Rvr,T3R ALPHA,T3R[a],Thr alpha,THRA1,THRA2,TR ALPHA,Tr alpha1,Tra1	thyroid hormone receptor, alpha	--		Nucleus	ligand-dependent nuclear receptor		3,5-diiodothyropropionic acid, amiodarone, levothyroxine, L-triiodothyronine	7067	21833	81812
THRB	C-erba-beta,ERBA-BETA,ERBA2,GRTH,MGC126109,MGC126110,MGC141269,MGC141270,NR1A2,PRTH,RATT3REC,T3RBETA,T3rec,T3R[b],THR1,THRB1,THYROID HORMONE RECEPTOR BETA,THYROID HORMONE RECEPTOR BETA2,TR BETA,TR BETA 1,Trb1,TRβ	thyroid hormone receptor, beta (erythroblastic leukemia viral (v-erb-a) oncogene homolog 2, avian)	--		Nucleus	ligand-dependent nuclear receptor		3,5-diiodothyropropionic acid, amiodarone, levothyroxine, L-triiodothyronine	7068	21834	24831
Thymidine Kinase	2'-deoxythymidine kinase,ATP:thymidine 5'-phosphotransferase,deoxythymidine kinase (phosphorylating),thymidine kinase (phosphorylating),TK	--	--	14	unknown	group
Thyroid hormone receptor	C-ERBA,T3 Receptor,T3r,TR	--	--	20	Nucleus	group
TIF2-NCOA1-p300-PCAF-CBP		--	--	20	Nucleus	complex
TIMELESS	C77407,Debt69,FLJ12640,FLJ20714,HTIM,TIM,TIM1,TIMELESS1	timeless homolog (Drosophila)	Q9UNS1	18	Nucleus	other			8914	21853	83508
TIMM50	2810403L02RIK,AU015082,MGC102733,TIM50,TIM50L	translocase of inner mitochondrial membrane 50 homolog (S. cerevisiae)	Q3ZCQ8	11	Cytoplasm	phosphatase			92609	66525	685725
TKT	FLJ34765,p68,TK,TKT1,TRANSKETOLASE	transketolase	P29401	15	Cytoplasm	enzyme			7086	21881	64524
TLN1	ILWEQ,KIAA1027,MGC116305,TALIN,TLN	talin 1	Q9Y490	16	Plasma Membrane	other			7094	21894	313494
TMEM43	1200015A22RIK,ARVC5,ARVD5,DKFZp586G1919,LUMA,MGC3222,MGC94413	transmembrane protein 43	Q9BTV4	2	Nucleus	other			79188	74122	362401
TMEM48	2810475A17RIK,AI450313,FLJ10407,FLJ12556,FLJ34120,NDC1,NET3,RP23-392J14.4	transmembrane protein 48	Q9BTX1	6	Nucleus	other			55706	72787	362557
TMPO	5630400D24Rik,AI195756,AI606875,AW214352,AW547477,CMD1T,LAP2,LEMD4,MGC61508,PRO0868,TP,TP alpha,TP beta/gamma	thymopoietin	P42167	18	Nucleus	other	Disease Progression		7112	21917	25359
TMX1	2810425A04Rik,AI465319,DKFZp564E1962,PDIA11,TMX,TXNDC,TXNDC1	thioredoxin-related transmembrane protein 1	Q9H3N1		Cytoplasm	enzyme			81542	72736	362751
Tnf receptor	TNF R1,Tnf receptor superfamily,TNFR	--	--	18	Plasma Membrane	group	Efficacy
TNKS	4930554K12Rik,AI662855,C86528,D130072O21RIK,mTNKS1,PARP-5a,PARPL,pART5,TANK1,TANKYRASE,Tankyrase I,TANKYRASE1,TIN1,TINF1,TNKS1	tankyrase, TRF1-interacting ankyrin-related ADP-ribose polymerase	O95271	21	Nucleus	enzyme			8658	21951	290794
TNPO1	AU021749,D13Ertd688e,IPO2,KAP BETA 2,KAP BETA 2A,KARYOPHERIN,Karyopherin beta-2,KPNB2,MIP,MIP1,TRANSPORTIN 1,TRN,TRN1	transportin 1	Q92973	2	Nucleus	transporter			3842	238799	309126
TNPO3	5730544L10Rik,C430013M08RIK,C81142,D6Ertd313e,IPO12,KIAA4133,MGC90049,mKIAA4133,MTR10A,NUCLEAR TRANSPORT RECEPTOR,Transportin-SR,TRN-SR,TRN-SR2	transportin 3	Q9Y5L0	2	Cytoplasm	other			23534	320938	296954
TOP1	Ab2-086,AI467334,D130064I21RIK,DNA topoisomerase type I,Scl70,TOPI,TOPO I,TOPO-1,TOPOISOMERASE I	topoisomerase (DNA) I	P11387	9	Nucleus	enzyme	Diagnosis,Efficacy	elsamitrucin, T 0128, CT-2106, BN 80927, tafluposide, TAS-103, beta-lapachone, irinotecan, topotecan, 9-amino-20-camptothecin, rubitecan, gimatecan, karenitecin	7150	21969	64550
Top2	DNA Topoisomerase II,Topo II,Topo2,topoisomerase II,Topoisomerase2	--	--	2	unknown	group	Diagnosis,Prognosis
TOP2A	DNA TOPOISOMERASE II ALPHA,TOP2,TOPO II,TOPO2 ALPHA,TOPOISOMERASE II ALPHA,TP2A	topoisomerase (DNA) II alpha 170kDa	P11388	2	Nucleus	enzyme	Diagnosis,Efficacy,Response to Therapy	novobiocin, etoposide, CPI-0004Na, pixantrone, becatecarin, elsamitrucin, AQ4N, BN 80927, tafluposide, mitoxantrone, norfloxacin, dexrazoxane, tirapazamine, TAS-103, gatifloxacin, valrubicin, gemifloxacin, nemorubicin, nalidixic acid, epirubicin, doxorubicin, daunorubicin	7153	21973	360243
TOP2B	D230016L12RIK,DNA topoisomerase II beta,TOP-2,TOP2BETA,TOPIIB,Topo2 beta,TOPOISOMERASE II BETA	topoisomerase (DNA) II beta 180kDa	Q02880	2	Nucleus	enzyme	Diagnosis	novobiocin, etoposide, CPI-0004Na, pixantrone, becatecarin, elsamitrucin, AQ4N, BN 80927, tafluposide, mitoxantrone, norfloxacin, dexrazoxane, tirapazamine, TAS-103, XK469, gatifloxacin, valrubicin, gemifloxacin, nemorubicin, nalidixic acid, epirubicin, doxorubicin, daunorubicin	7155	21974	361100
TOPORS	AW105885,LUN,P53BP3,p53BP3/LUN,RP31,TP53BPL	topoisomerase I binding, arginine/serine-rich, E3 ubiquitin protein ligase	Q9NS56	8	Nucleus	enzyme			10210	106021	362501
TP63	AI462811,AIS,B(p51A),B(p51B),CLIMP63,DELTA N p63,Delta N p63 Alpha,EEC3,KET,LMS,MGC115972,NBP,OFC8,p40,p51,P51/P63,p53CP,P63,p63 alpha isoform,p63 gamma isoform,p73H,P73L,RHS,SHFM4,TAp63,TP53CP,TP53L,TP73L,Trp53rp1,TRP63,TUMOR PROTEIN 63 KDA WITH STRONG HOMOLOGY TO P53	tumor protein p63	Q9H3D4	13	Nucleus	transcription regulator	Diagnosis,Efficacy,Prognosis,Unspecified Application		8626	22061	246334
TP73	P73,p73RhoGAP,TRP73	tumor protein p73	O15350	13	Nucleus	transcription regulator	Diagnosis,Efficacy,Safety		7161	22062	362675
TP53 (includes EG:22059)	bbl,bfy,bhy,FLJ92943,LFS1,MGC112612,p44,P53,TRP53	tumor protein p53	P04637	8	Nucleus	transcription regulator	Diagnosis,Disease Progression,Efficacy,Prognosis,Response to Therapy,Unspecified Application		7157	22059	24842
TP53BP1	53BP1,FLJ41424,LOC100502715,LOC688035,m53BP1,MGC100303,MGC138366,p202,P53bp1,TRP53BP1	tumor protein p53 binding protein 1	Q12888	14	Nucleus	transcription regulator			7158	27223	296099
TPR	2610029M07Rik,C77892,FLJ13049	translocated promoter region (to activated MET oncogene)	P12270	6	Nucleus	other			7175	108989	304862
TRA2A	1500010G04RIK,AL022798,G430041M01RIK,HSU53209,mAWMS1,RGD1562563,TRA2 ALPHA,TRANSFORMER-2 ALPHA	transformer 2 alpha homolog (Drosophila)	Q13595		Nucleus	other	Diagnosis		29896	101214	500116
Transportin	TRN	--	--	2	unknown	group
TRAP1	2410002K23RIK,HSP75,HSP90L,MGC95278	TNF receptor-associated protein 1	Q12931	5	Cytoplasm	enzyme			10131	68015	287069
tretinoin	(2E,4E,6E,8E)-3,7-dimethyl-9-(2,6,6-trimethylcyclohexen-1-yl)nona-2,4,6,8-tetraenoic acid,13497-05-7,22232-80-0,302-79-4,75980-27-7,all-trans retinoic acid,Altinac,Avita,C20H28O2,Renova,Retin A Micro Gel,Retin-A,retinoic acid,retinoic acid, all-trans-,retinoic acid, sodium salt,tretinoin potassium salt,tretinoin sodium salt,Tretinoin Topical,tretinoin zinc salt,Vesanoid,vitamin A acid	--	--	23	unknown	chemical - endogenous mammalian
TRIM24	A130082H20Rik,AI447469,D430004I05Rik,HTIF1,PTC6,RNF82,TF1A,TIF-1α,TIF1,TIF1A,TIF1ALPHA	tripartite motif containing 24	O15164	9	Nucleus	transcription regulator			8805	21848	500084
TRIM28	AA408787,FLJ29029,Hs.158209,KAP-1,KRAB-ASSOCIATED PROTEIN 1,KRIP-1,LOC100502802,MGC102100,RNF96,TF1B,TIF1B,TIF1BETA,Transcription intermediary factor 1 beta,XSG22	tripartite motif containing 28	Q13263	8	Nucleus	transcription regulator			10155	21849	116698
TRIM33	8030451N04RIK,AI413936,DKFZp586K1123,ECTO,ECTODERMIN,FLJ32925,mKIAA1113,PTC7,RFG7,TF1G,TIF1 GAMMA,TIF1G,TIFGAMMA	tripartite motif containing 33	Q9UPN9	9	Nucleus	transcription regulator			51592	94093	365894
TRIP12	1110036I07RIK,6720416K24RIK,AA410158,GTL6,KIAA0045,MGC124674,MGC125132,MGC138849,MGC138850,MGC31615,ULF	thyroid hormone receptor interactor 12	Q14669	12	Cytoplasm	enzyme			9320	14897	316575
TRPS1	AI115454,AI447310,D15Ertd586e,GC79,LGCR,MGC107472,MGC134928,MGC46754	trichorhinophalangeal syndrome I	Q9UHF7		Nucleus	transcription regulator	Diagnosis,Prognosis		7227	83925	299897
TRRAP	AI481500,FLJ10671,PAF350/400,PAF400,PCAF-associated factor 400, PAF400,STAF40,TR-AP,Tra1	transformation/transcription domain-associated protein	--		Nucleus	transcription regulator			8295	100683	288471
Trypsin	alpha-trypsin,beta-trypsin,cocoonase,Pancreatic Trypsin,parenzyme,parenzymol,Pronase E,pseudotrypsin,sperm receptor hydrolase,tripcellim,tryptar,tryptase,trypure	--	--	15	Extracellular Space	group
TSC22D1	AA589566,AW105905,Cerebral protein-2,DKFZp686O19206,Egr5,MGC156831,MGC17597,Ptg-2,TGFB1I4,Tilz1b,Transforming growth factor beta 1 induced transcript 4,Transforming growth factor beta stimulated clone 22,TS22A,Tsc,TSC-22	TSC22 domain family, member 1	Q15714	3	Nucleus	transcription regulator			8848	21807	498545
TSH	Thyrotropin	--	--	24	Plasma Membrane	complex
TUBA1A	Alpha tubulin,Alpha tubulin isotype M alpha 1,Alpha1 tubulin,B-ALPHA-1,FLJ25113,LIS3,MGC102097,MGC102098,MGC102099,T-Alpha1 Tubulin,TRAF interacting,Tuba-1,Tuba2,TUBA3,Tubulin,TUBULIN ALPHA 3	tubulin, alpha 1a	Q71U36	10	Cytoplasm	other	Unspecified Application	epothilone B, ixabepilone, colchicine/probenecid, XRP9881, eribulin, AL 108, EC145, NPI-2358, milataxel, TPI 287, TTI-237, docetaxel, vinflunine, vinorelbine, vincristine, vinblastine, paclitaxel, podophyllotoxin, colchicine	7846	22142	64158
TUBA1B	K ALPHA 1-TUBULIN,K-ALPHA-1,MGC102558,MGC117866,MGC118411,RGD1565476,Tuba2	tubulin, alpha 1b	P68363	10	Cytoplasm	other	Diagnosis,Efficacy		10376	22143	500929
TUBB4	AI325297,Beta tubulin,BETA TUBULIN 4 ALPHA,Beta tubulin class iv,beta-5,Beta4 Tubulin,Class IVa Beta-Tubulin,M(beta)4,Tubb,TUBB5,TUBULIN BETA (5-BETA),TUBULIN BETA5	tubulin, beta 4	P04350	10	Cytoplasm	other		epothilone B, ixabepilone, colchicine/probenecid, XRP9881, ABT-751, eribulin, MST-997, AL 108, EC145, NPI-2358, milataxel, TPI 287, TTI-237, brentuximab vedotin, cabazitaxel, BMS-275183, docetaxel, vinflunine, vinorelbine, vincristine, vinblastine, paclitaxel, podophyllotoxin, colchicine	10382	22153	29213
TUBB6	2310057H16RIK,BB220206,HsT1601,MGC116110,MGC132410,MGC4083,RGD1305887,TUBB-5,Tubulin Beta 5	tubulin, beta 6	Q9BUF5	10	Cytoplasm	other		brentuximab vedotin, cabazitaxel	84617	67951	307351
TUBB	AA408537,AI596182,B130022C14RIK,Beta tubulin,Beta tubulin 1,M(beta)5,M40,MGC117247,MGC16435,OK/SW-CL.56,TUBB1,TUBB5,TUBULIN BETA 5	tubulin, beta	P07437	10	Cytoplasm	other	Efficacy	brentuximab vedotin, cabazitaxel	203068	22154	29214
TUBB2A	BETA TUBULIN,Beta-tubulin class ii,dJ40E16.7,M(beta)2,TUBB,TUBB2,TUBB2B,TUBULIN BETA 2A	tubulin, beta 2A	Q13885	10	Cytoplasm	other		epothilone B, ixabepilone, colchicine/probenecid, XRP9881, ABT-751, eribulin, MST-997, AL 108, EC145, NPI-2358, milataxel, TPI 287, TTI-237, brentuximab vedotin, cabazitaxel, BMS-275183, docetaxel, vinflunine, vinorelbine, vincristine, vinblastine, paclitaxel, podophyllotoxin, colchicine	7280	22151	498736
TUBB2B	2410129E14RIK,bA506K6.1,Beta-tubulin T beta15,Beta1 Tubulin,Beta2 Tubulin,DKFZp566F223,FLJ98847,MGC124866,MGC8685,RGD1309427,RP11-506K6.1,Tubb2,Tubulin beta-4 chain	tubulin, beta 2B	Q9BVA1		Cytoplasm	other		brentuximab vedotin, cabazitaxel	347733	73710	291081
TUBB2C	4930542G03RIK,Beta2,Class IVb Beta-Tubulin,MGC101937,MGC28623,MGC6713,MGC73008,RP23-132N23.7,TUBB2,Tubb2c1,TUBB4B	tubulin, beta 2C	P68371	10	Cytoplasm	other	Unspecified Application	epothilone B, ixabepilone, colchicine/probenecid, XRP9881, ABT-751, eribulin, MST-997, AL 108, EC145, NPI-2358, milataxel, TPI 287, TTI-237, brentuximab vedotin, cabazitaxel, BMS-275183, docetaxel, vinflunine, vinorelbine, vincristine, vinblastine, paclitaxel, colchicine	10383	227613	296554
Tubulin		--	--	10	Cytoplasm	complex	Efficacy,Response to Therapy
TYMS	HST422,MGC156654,MGC88736,THYMIDYLATE SYNTHASE,TMS,TS	thymidylate synthetase	P04818	17	Nucleus	enzyme	Diagnosis,Disease Progression,Efficacy,Prognosis,Response to Therapy	flucytosine, 5-fluorouracil, plevitrexed, nolatrexed, capecitabine, trifluridine, floxuridine, LY231514	7298	22171	29261
UBA2	AA986091,ARX,FLJ13058,HRIHFB2115,LOC100505842,SAE2,UBA1,Ubl1a2,UBLE1B	ubiquitin-like modifier activating enzyme 2	Q9UBT2	2	Cytoplasm	enzyme			10054	50995	308508
UBC	2700054O04Rik,AI194771,HMG20,Polyubiquitin,Rps27a,TI-225,Uba52,Ubb,UBIQUITIN C	ubiquitin C	P0CG48	13	Cytoplasm	enzyme	Diagnosis		7316	22190	50522
UBE2I	5830467E05Rik,C358B7.1,F830028O17RIK,MGC105476,Mubc,P18,SUMO E2,UBC9,UbcE2A,Ubce2i,Ubce9	ubiquitin-conjugating enzyme E2I	P63279	2	Nucleus	enzyme	Disease Progression		7329	22196	25573
UBE2K	AW492011,D5Ertd601e,DKFZp564C1216,DKFZp686J24237,E2-25K,HIP2,HYPG,LIG,UBC1,UBIQUITIN CARRIER,UBIQUITIN CARRIER PROTEIN	ubiquitin-conjugating enzyme E2K	P61086	13	Cytoplasm	transcription regulator			3093	53323	289623
Ubiquitin	Polyubiquitin,Ub	--	--	13	Cytoplasm	group	Prognosis
UBTF	A930005G04RIK,NOR-90,TCFUBF,UBF,UBF1	upstream binding transcription factor, RNA polymerase I	P17480	8	Nucleus	transcription regulator			7343	21429	25574
UPF1	B430202H16RIK,FLJ43809,FLJ46894,HUPF1,KIAA0221,NORF1,PNORF-1,RENT1,smg-2,Upflp	UPF1 regulator of nonsense transcripts homolog (yeast)	Q92900	23	Nucleus	enzyme			5976	19704
USO1	MGC128739,MGI:1929095,P115,TAP,Transcytosis associated protein p115,VDP,VESICLE DOCKING PROTEIN p115	USO1 vesicle docking protein homolog (yeast)	O60763	16	Cytoplasm	transporter			8615	56041	56042
USP14	2610005K12Rik,2610037B11RIK,AW107924,ax,C78769,MGC95160,TGT,Ubiquitin specific protease 14	ubiquitin specific peptidase 14 (tRNA-guanine transglycosylase)	P54578	13	Cytoplasm	peptidase			9097	59025	291796
USP25	USP21	ubiquitin specific peptidase 25	Q9UHP3		unknown	peptidase			29761	30940	304150
USP34	A530081C03RIK,FLJ43910,KIAA0570,KIAA0729,MGC104459,MURR2	ubiquitin specific peptidase 34	Q70CQ2		unknown	peptidase			9736	17847
USP39	AA408960,AI894154,CGI-21,D6Wsu157e,HSPC332,MGC75069,SAD1,SNRNP65	ubiquitin specific peptidase 39	Q53GS9		Nucleus	peptidase			10713	28035	297336
VAPA	Erg30,hVAP-33,MGC3745,VAMP-ASSOCIATED,VAP-33	VAMP (vesicle-associated membrane protein)-associated protein A, 33kDa	Q9P0L0	7	Plasma Membrane	other			9218	30960	58857
VASP	AA107290,MGC127789	vasodilator-stimulated phosphoprotein	P50552		Plasma Membrane	other	Efficacy		7408	22323	361517
VAV1	p95 VAV,VAV,vav-T	vav 1 guanine nucleotide exchange factor	--		Nucleus	transcription regulator			7409	22324	25156
VAV		--	--	21	Cytoplasm	group
VCL	9430097D22,AA571387,AI462105,AW545629,CMD1W,CMH15,MVCL,VINCULIN	vinculin	P18206	7	Plasma Membrane	enzyme			7414	22330	305679
VCP	3110001E05,ALS14,CDC48,IBMPFD,MGC131997,MGC148092,MGC8560,P97,P97 kinase,p97/VCP,Ter atpase,TERA,TRANSITIONAL ENDOPLASMIC RETICULUM ATPASE,XSG7	valosin containing protein	P55072	7	Cytoplasm	enzyme			7415	269523	116643
VDAC1	AL033343,Brain Derived Voltage-Dependent Ion Channel,MGC111064,Nadh fecn reductase,PORIN,PORIN 31HM,VDAC,Vdac5,VOLTAGE DEPENDENT ANION CHANNEL	voltage-dependent anion channel 1	P21796	10	Cytoplasm	ion channel			7416	22333	83529
VDAC2	FLJ23841,mVDAC2,mVDAC6,POR,Vdac6	voltage-dependent anion channel 2	P45880	11	Cytoplasm	ion channel			7417	22334	83531
VDAC3	HD-VDAC3,MGC102096	voltage-dependent anion channel 3	Q9Y277	11	Cytoplasm	ion channel			7419	22335	83532
Vegf	VEGF mRNA	--	--	17	Cytoplasm	group	Diagnosis,Disease Progression,Efficacy,Prognosis,Response to Therapy,Safety,Unspecified Application
VHL	HRCA1,PVHL,PVHL30,RCA1,VHL1,VHLH	von Hippel-Lindau tumor suppressor	P40337	16	Nucleus	other	Diagnosis,Efficacy		7428	22346	24874
VIM	FLJ36605,MGC102095,MGC139781,PAL-E,VIMENTIN	vimentin	P08670	1	Cytoplasm	other	Diagnosis,Efficacy,Prognosis		7431	22352	81818
VitaminD3-VDR-RXR		--	--	20	Nucleus	complex
WARS	GAMMA-2,IFI53,IFP53,TRPRS,TRYPTOPHANYL TRNA SYNTHETASE,WRS	tryptophanyl-tRNA synthetase	P23381	22	Cytoplasm	enzyme	Prognosis		7453	22375	314442
WDR33	1110001N06RIK,2310011G05Rik,2810021O11Rik,8430413N20Rik,CFII,FLJ11294,NET14,WDC146	WD repeat domain 33	Q9C0J8		Nucleus	other			55339	74320	307524
WDR77	2610003I18RIK,2610312E17RIK,C79984,HKMT1069,MEP-50,METHYLOSOME PROTEIN 50,MGC2722,Nbla10071,p44,p44/MEP50,RGD1310479,RP11-552M11.3	WD repeat domain 77	Q9BQA1	4	Nucleus	transcription regulator			79084	70465	310769
Wnt		--	--	15	Extracellular Space	group
WRN	AI846146,DKFZp686C2056,RECQ3,RECQL2,RECQL3,RGD1564788,WS	Werner syndrome, RecQ helicase-like	Q14191	7	Nucleus	enzyme			7486	22427	290805
WT1	AWT1,D630046I19RIK,EWS-WT1,GUD,NPHS4,WAGR,WIT-2,WT,WT33	Wilms tumor 1	P19544	1	Nucleus	transcription regulator	Diagnosis,Disease Progression,Prognosis		7490	22431	24883
XBP1 (includes EG:140614)	D11Ertd39e,Hepatocarcinogenesis-related transcription factor,HTF,Sxbp-1,TREB-5,XBP1 mRNA,XBP2	X-box binding protein 1	P17861	11	Nucleus	transcription regulator			7494	22433	289754
XPC	RAD4,XP3,XPCC	xeroderma pigmentosum, complementation group C	Q01831	8	Nucleus	other	Diagnosis		7508	22591	312560
XPO1	AA420417,CRM1,CRMA,CRMI,DKFZp686B1823,emb,Exp1,EXPORTIN 1	exportin 1 (CRM1 homolog, yeast)	O14980	2	Nucleus	transporter	Diagnosis,Efficacy		7514	103573	85252
XPO5	2410004H11Rik,2700038C24Rik,AI648907,AW549301,EXP5,Exportin 5,FLJ14239,FLJ32057,FLJ45606,KIAA1291,mKIAA1291,RanBp21	exportin 5	Q9HAV4	2	Nucleus	transporter			57510	72322	363194
XPO7	4930506C02RIK,BB164534,EXP7,KIAA0745,mKIAA0745,RANBP16	exportin 7	Q9UIA9	13	Nucleus	transporter			23039	65246	361070
XRCC4	2310057B22Rik,AW413319,AW545101,MGC95022	X-ray repair complementing defective repair in Chinese hamster cells 4	Q13426	21	Nucleus	other			7518	108138	309995
XRCC5	AI314015,FLJ39089,KARP-1,KU (p70/p80) SUBUNIT,Ku large subunit,KU80,KU86,KUB2,Kup80,NFIV	X-ray repair complementing defective repair in Chinese hamster cells 5 (double-strand-break rejoining)	P13010	20	Nucleus	enzyme	Prognosis,Unspecified Application		7520	22596	363247
XRN2	5'-3' Exoribonuclease 2	5'-3' exoribonuclease 2	Q9H0D6		Nucleus	enzyme			22803	24128	362229
YAP1 (includes EG:10413)	AI325207,YAP,YAP2,YAP65,YKI,Yorkie	Yes-associated protein 1	P46937	12	Nucleus	transcription regulator			10413	22601	363014
YARS	AL024047,AU018965,CMTDIC,MGC112837,MGC139774,TYROSYL TRNA SYNTHETASE,TYRRS,YRS,YTS	tyrosyl-tRNA synthetase	P54577	1	Cytoplasm	enzyme			8565	107271	313047
YWHAZ	1110013I11RIK,14-3-3 DELTA,14-3-3 S1,14-3-3 ZETA/DELTA,14-3-3-ZETA,14-3-3z,AI596267,AL022924,AU020854,KCIP-1,MGC111427,MGC126532,MGC138156,Protein kinase c inhibitor 1 beta/alpha,Protein kinase C inhibitor protein 1 zeta/delta,Tyr mono,TYROSINE 3-MONOOXYGENASE ZETA POLYPEPTIDE,YMHAZ,YWHAD	tyrosine 3-monooxygenase/tryptophan 5-monooxygenase activation protein, zeta polypeptide	P63104	3	Cytoplasm	enzyme	Diagnosis		7534	22631	25578
YY1	AW488674,DELTA,Histone alpha factor,INO80S,NF-E1,NMP1,UCRBP,Yin and yang 1,YIN-YANG-1,YING-YANG-1	YY1 transcription factor	P25490	17	Nucleus	transcription regulator			7528	22632	24919
ZBTB2	Gm1103,ZNF437	zinc finger and BTB domain containing 2	Q8N680	9	Nucleus	other			57621	381990	308126
ZBTB4	2310026P19RIK,9230111I22RIK,KAISO-L1,KIAA1538,mKIAA1538,RP23-422L16.16,ZNF903	zinc finger and BTB domain containing 4	Q9P1Z0		Nucleus	other			57659	75580	287441
ZBTB5	5930421I10,9430083K24RIK,AI646847,KIAA0354,mKIAA0354	zinc finger and BTB domain containing 5	O15062		Nucleus	other			9925	230119	298084
ZBTB16	AI467657,KRUPPEL-LIKE ZNF,lu,LX,PLZF,ZFP145,ZNF145	zinc finger and BTB domain containing 16	Q05516	12	Nucleus	transcription regulator			7704	235320	353227
ZBTB38	A930014K01RIK,CIBZ,FLJ22332,FLJ31131,FLJ35036,RGD1310136,ZNF921	zinc finger and BTB domain containing 38	Q8NAP3		Nucleus	transcription regulator			253461	245007	315936
ZBTB7A	9030619K07RIK,9130006G12Rik,AI452336,DKFZp547O146,FBI-1,LRF,MGC99631,OCZF,Pokemon,ZBTB7,ZNF857A	zinc finger and BTB domain containing 7A	O95365	4	Nucleus	transcription regulator			51341	16969	117107
ZEB1	3110032K11Rik,AREB6,BZP,DELTAEF1,FECD6,MEB1,MGC133261,Nil2,NIL2A,PPCD3,Tcf18,TCF8,TCP8,TF8,TRANSCRIPTION FACTOR 8,ZEB,ZFHEP,Zfhep2,ZFHX1A,Zfx1a,Zfx1ha,[delta]EF1	zinc finger E-box binding homeobox 1	--		Nucleus	transcription regulator			6935	21417	25705
ZEB2	9130203F04RIK,D130016B08RIK,FLJ42816,HSPC082,KIAA0569,LOC100128821,mKIAA0569,Sip,SIP-1,SMADIP1,ZFHX1B,Zfx1b,Zfxh1b	zinc finger E-box binding homeobox 2	O60315	21	Nucleus	transcription regulator			9839	24136	311071
ZFPM1	FOG,FOG1,ZNF408,ZNF89A	zinc finger protein, multitype 1	Q8IX07	8	Nucleus	transcription regulator			161882	22761
ZIC2	HPE5,KU	Zic family member 2	O95409	11	Nucleus	transcription regulator	Prognosis		7546	22772	361096
ZIC3	Bn,HTX,HTX1,RGD1561261,ZNF203	Zic family member 3	O60481	17	Nucleus	transcription regulator			7547	22773	367944
ZMPSTE24	A530043O15Rik,CAAX ENDOPROTEASE,D030046F19,FACE-1,FLJ14968,HGPS,MADB,PRO1,STE24,STE24P	zinc metallopeptidase (STE24 homolog, S. cerevisiae)	O75844	19	Nucleus	peptidase			10269	230709	313564
ZMYM2	5830413P05Rik,FIM,MGC51607,MYM,RAMP,SCLL,ZFP198,ZINC FINGER PROTEIN 198,ZNF198	zinc finger, MYM-type 2	Q9UBW7	9	Nucleus	other			7750	76007	305913
ZNF76	2810027J07,BC025615,D6S229E,MGC188390,MGC66570,MGC79196,ZFP523,ZNF523	zinc finger protein 76	P36508	24	Nucleus	other			7629	224656	361809
ZNF148	2210405J08Rik,AI480666,AW045217,BERF-1,BFCOL1,DKFZp686L18248,HT-BETA,KW10,MT-BETA,pHZ-52,ZBP-89,ZFP148	zinc finger protein 148	Q9UQR1	8	Nucleus	transcription regulator			7707	22661	58820
ZNF295	5430437K12Rik,B430213I24Rik,DKFZp781N1974,mKIAA1227,ZBTB21,ZFP295	zinc finger protein 295	Q9ULJ3	22	Nucleus	other			49854	114565	304056
ZNF326	5730470H14Rik,dJ871E2.1,FLJ20403,MGC61591,ZAN75,ZFP326	zinc finger protein 326	Q5BKZ1		Nucleus	transcription regulator			284695	54367
ZNF462	6030417H05,9430078C22Rik,DKFZp686B2325,DKFZp762N2316,FLJ14960,FLJ45904,Gt4-2,KIAA1803,RGD1562123,RP11-508N12.1,ZFP462,Zfpip	zinc finger protein 462	Q96JM2	9	Nucleus	other			58499	242466	362522
ZNF687	4931408L03RIK,DKFZp781I1719,KIAA1441,mKIAA1441,RP11-126K1.3,Zfp687	zinc finger protein 687	Q8N1G0	4	Nucleus	other			57592	78266
ZNF711	2810409C01RIK,A230078I01,A230078I01Rik,CMPX1,dJ75N13.1,RGD1562768,Zfp711,ZNF4,ZNF5,ZNF6	zinc finger protein 711	Q9Y462	23	Nucleus	other			7552	245595	302327
